# Supplementary material for: Genome-wide identification of CBF genes and their responses to cold acclimation in Taraxacum kok-saghyz
Source: PeerJ journal article supplement (doi:10.7717/peerj.13429), 2022-05-12
Supplement: Raw_data.zip [file 18S.xls]

## Sheet: Results
Block Type	96alum
Chemistry	SYBR_GREEN
Experiment File Name	D:\Documents and Settings\INSTR-ADMIN\Recent\1116Untitled.eds
Experiment Run End Time	2013-01-09 02:38:13 AM CST
Instrument Type	sds7500
Passive Reference	ROX
Well	Sample Name	Target Name	Task	Reporter	Quencher	RQ	RQ Min	RQ Max	Cт	Cт Mean	Cт SD	ΔCт	ΔCт Mean	ΔCт SE	HK Control ΔCт Mean	HK Control ΔCт SE	ΔΔCт	Automatic Ct Threshold	Ct Threshold	Automatic Baseline	Baseline Start	Baseline End	Efficiency	Tm1	Tm2	Tm3	Comments	HIGHSD	NOAMP	EXPFAIL
A1	3-1	18S	UNKNOWN	SYBR	None				13.722	13.3409	0.341726							TRUE	0.235495	TRUE	3	16	1	82.9667				N	N	N
A2	3-1	18S	UNKNOWN	SYBR	None				13.2388	13.3409	0.341726							TRUE	0.235495	TRUE	3	16	1	83.1418				N	N	N
A3	3-1	18S	UNKNOWN	SYBR	None				13.0618	13.3409	0.341726							TRUE	0.235495	TRUE	3	15	1	83.1418				N	N	N
A4	12-1	18S	UNKNOWN	SYBR	None				14.0545	13.8609	0.168805							TRUE	0.235495	TRUE	3	8	1	83.3169				N	N	N
A5	12-1	18S	UNKNOWN	SYBR	None				13.7449	13.8609	0.168805							TRUE	0.235495	TRUE	3	8	1	83.3169				N	N	N
A6	12-1	18S	UNKNOWN	SYBR	None				13.7832	13.8609	0.168805							TRUE	0.235495	TRUE	3	8	1	83.3169				N	N	N
B1	3-2	18S	UNKNOWN	SYBR	None				32.3186	13.6197	9.08731							TRUE	0.235495	TRUE	3	25	1	71.7582				Y	N	N
B2	3-2	18S	UNKNOWN	SYBR	None				16.9645	13.6197	9.08731							TRUE	0.235495	TRUE	3	11	1	83.1418				Y	N	N
B3	3-2	18S	UNKNOWN	SYBR	None				16.2197	13.6197	9.08731							TRUE	0.235495	TRUE	3	11	1	83.3169				Y	N	N
B4	12-2	18S	UNKNOWN	SYBR	None				17.3412	17.3697	0.0943003							TRUE	0.235495	TRUE	3	12	1	83.3169				N	N	N
B5	12-2	18S	UNKNOWN	SYBR	None				17.475	17.3697	0.0943003							TRUE	0.235495	TRUE	3	12	1	83.3169				N	N	N
B6	12-2	18S	UNKNOWN	SYBR	None				17.2929	17.3697	0.0943003							TRUE	0.235495	TRUE	3	12	1	83.3169				N	N	N
C1	3-3	18S	UNKNOWN	SYBR	None				13.8566	13.3416	0.451612							TRUE	0.235495	TRUE	3	8	1	83.3169				N	N	N
C2	3-3	18S	UNKNOWN	SYBR	None				13.1548	13.3416	0.451612							TRUE	0.235495	TRUE	3	8	1	83.4921				N	N	N
C3	3-3	18S	UNKNOWN	SYBR	None				13.0133	13.3416	0.451612							TRUE	0.235495	TRUE	3	7	1	83.4921				N	N	N
C4	12-3	18S	UNKNOWN	SYBR	None				17.8614	17.6929	0.155126							TRUE	0.235495	TRUE	3	16	1	83.3169				N	N	N
C5	12-3	18S	UNKNOWN	SYBR	None				17.6611	17.6929	0.155126							TRUE	0.235495	TRUE	3	16	1	83.4921				N	N	N
C6	12-3	18S	UNKNOWN	SYBR	None				17.5561	17.6929	0.155126							TRUE	0.235495	TRUE	3	16	1	83.4921				N	N	N
D1	6-1	18S	UNKNOWN	SYBR	None				14.9969	15.0276	0.742206							TRUE	0.235495	TRUE	3	10	1	83.3169				Y	N	N
D2	6-1	18S	UNKNOWN	SYBR	None				14.8745	15.0276	0.742206							TRUE	0.235495	TRUE	3	9	1	83.4921				Y	N	N
D3	6-1	18S	UNKNOWN	SYBR	None				15.2276	15.0276	0.742206							TRUE	0.235495	TRUE	3	9	1	83.4921				Y	N	N
D4	24-1	18S	UNKNOWN	SYBR	None				20.5502	20.4466	0.11463							TRUE	0.235495	TRUE	3	15	1	83.4921				N	N	N
D5	24-1	18S	UNKNOWN	SYBR	None				20.4662	20.4466	0.11463							TRUE	0.235495	TRUE	3	15	1	83.4921				N	N	N
D6	24-1	18S	UNKNOWN	SYBR	None				20.3234	20.4466	0.11463							TRUE	0.235495	TRUE	3	15	1	83.6672				N	N	N
E1	6-2	18S	UNKNOWN	SYBR	None				14.0072	14.2007	0.44812							TRUE	0.235495	TRUE	3	9	1	83.3169				N	N	N
E2	6-2	18S	UNKNOWN	SYBR	None				14.2007	14.2007	0.44812							TRUE	0.235495	TRUE	3	8	1	83.4921				N	N	N
E3	6-2	18S	UNKNOWN	SYBR	None				14.2654	14.2007	0.44812							TRUE	0.235495	TRUE	3	9	1	83.4921				N	N	N
E4	24-2	18S	UNKNOWN	SYBR	None				20.0867	19.8458	0.212821							TRUE	0.235495	TRUE	3	10	1	83.4921				N	N	N
E5	24-2	18S	UNKNOWN	SYBR	None				19.7678	19.8458	0.212821							TRUE	0.235495	TRUE	3	10	1	83.6672				N	N	N
E6	24-2	18S	UNKNOWN	SYBR	None				19.7331	19.8458	0.212821							TRUE	0.235495	TRUE	3	10	1	83.6672				N	N	N
F1	6-3	18S	UNKNOWN	SYBR	None				15.3578	15.0273	0.304305							TRUE	0.235495	TRUE	3	9	1	83.1418				N	N	N
F2	6-3	18S	UNKNOWN	SYBR	None				14.9654	15.0273	0.304305							TRUE	0.235495	TRUE	3	9	1	83.3169				N	N	N
F3	6-3	18S	UNKNOWN	SYBR	None				14.7586	15.0273	0.304305							TRUE	0.235495	TRUE	3	9	1	83.4921				N	N	N
F4	24-3	18S	UNKNOWN	SYBR	None				19.2576	19.1307	0.110119							TRUE	0.235495	TRUE	3	14	1	83.4921				N	N	N
F5	24-3	18S	UNKNOWN	SYBR	None				19.0609	19.1307	0.110119							TRUE	0.235495	TRUE	3	14	1	83.4921				N	N	N
F6	24-3	18S	UNKNOWN	SYBR	None				19.0734	19.1307	0.110119							TRUE	0.235495	TRUE	3	14	1	83.4921				N	N	N
Analysis Type	Singleplex
Endogenous Control	18S
RQ Min/Max Confidence Level	95.0
Reference Sample	3-1

## Sheet: Raw Data
Block Type	96alum
Chemistry	SYBR_GREEN
Experiment File Name	D:\Documents and Settings\INSTR-ADMIN\Recent\1116Untitled.eds
Experiment Run End Time	2013-01-09 02:38:13 AM CST
Instrument Type	sds7500
Passive Reference	ROX
Well	Cycle	1	2	3	4	5
A1	1	373943	93374.1	59092.6	520620	3109.34
A2	1	212163	55570.6	39134.3	329759	1480.04
A3	1	195801	50026.8	38634.7	319852	1212.35
A4	1	298783	61679.1	52263.7	385377	2406.22
A5	1	298179	69903.7	58637.5	424341	2247.15
A6	1	239957	53704.1	51493.4	377628	1815.78
A7	1	443380	59778	60008.2	367855	4670.91
A8	1	289330	57076.9	62017.5	452308	3082.66
A9	1	251121	52065.3	54172	408413	2411.81
A10	1	471840	79814.3	70886.3	497466	4551.12
A11	1	434647	88550.7	71577.1	570424	181.432
A12	1	454256	96292.3	68798.4	563434	4301.7
B1	1	673860	94833.9	68811.4	446309	7132.33
B2	1	258506	50172.8	43644.9	335298	2596.25
B3	1	208527	45331.1	41101.7	310864	1378.01
B4	1	249177	57020.7	51110.9	364116	8259.72
B5	1	269854	63696	59239.9	407337	2775.59
B6	1	252875	59162.6	56694.1	383330	2481.95
B7	1	293421	47944.1	53164.8	342050	2949.92
B8	1	278041	55816.4	60362.2	408617	3070.73
B9	1	206717	44302.8	47753.5	342170	1857.1
B10	1	335488	77591.3	65466.2	459549	2859.04
B11	1	344228	83317.2	69133.4	517153	2913.84
B12	1	351316	89099.5	64106.8	511322	2806.74
C1	1	457298	103328	74416.8	569589	4767.07
C2	1	234525	58253.1	47300.2	357578	2405.48
C3	1	210185	52572.8	46678	335367	1849.48
C4	1	235204	54230.3	50999.3	344623	2710.49
C5	1	321434	74997.4	69318.3	443423	2976.99
C6	1	260529	61231	61514.3	395774	2319.73
C7	1	240441	59513.4	61602	401323	2552.88
C8	1	259630	60864.7	64722.9	424091	2230.92
C9	1	191420	45970.8	49388.6	341215	1286.92
C10	1	505928	75627.6	75347.5	454032	5121.5
C11	1	359389	75535.5	72000	521807	3589.66
C12	1	336731	71245.6	59910.5	463540	2743.78
D1	1	535477	112362	86082.7	629132	5523.71
D2	1	257280	64436.5	51805.2	376280	1893.08
D3	1	271647	62847.5	58076.9	394644	2431.54
D4	1	278946	67083.4	62593	402971	2739.86
D5	1	371954	89466.1	83807.3	509621	3980.07
D6	1	309030	74181.6	74219.8	449918	3097.52
D7	1	483373	81194.3	84405.7	444654	5516.12
D8	1	339266	67021.2	78669	477129	3439.55
D9	1	211878	48062.1	56527.7	366982	2549.74
D10	1	345186	78965.5	77610.8	509313	3096.21
D11	1	334343	82324.2	74613.2	529430	2202.47
D12	1	352430	88924.6	73092.9	558652	3164.06
E1	1	536313	121241	88349.2	637744	4971.16
E2	1	275971	66643.9	58232.6	418861	2692.86
E3	1	281528	67151.3	62918.1	417473	2106.87
E4	1	363293	83086.2	82516	507104	3424.44
E5	1	396670	94028.8	91989.4	547181	3538.46
E6	1	330198	79435.1	80938.1	475493	3286.6
E7	1	285359	61696.6	74824.3	445164	3293.72
E8	1	354867	83467.5	93359.3	562427	3573.95
E9	1	242760	59168.5	65714.8	419785	2427.42
E10	1	635077	87500.1	92406	509283	7076.38
E11	1	410628	75224.5	82779.4	566008	4052.39
E12	1	425069	78411.1	78721.9	584873	4545.24
F1	1	507574	127530	89014.6	627448	4664.1
F2	1	260900	68616.8	57431.3	415535	1844.41
F3	1	279050	72118.1	66499	435752	2228.83
F4	1	351690	81710.5	80135.7	497379	3251.17
F5	1	449180	105605	104284	632848	4014.93
F6	1	379742	90568.2	89942.7	530201	3810.19
F7	1	296913	71720.3	84764.8	515286	3235.17
F8	1	378748	91342.2	99915.9	605084	4288.98
F9	1	273710	67751	73975.9	476516	2413.66
F10	1	555001	95444.4	96355.1	589328	5448.73
F11	1	451142	101953	95168.5	662484	2991.01
F12	1	407629	93886.3	80028.9	611732	4030.94
G1	1	523993	47590.6	27240.7	23518.1	6480.87
G2	1	265731	23467.8	13042.8	11086.3	3107.71
G3	1	300394	27603.5	15776.2	12303.9	3111.37
G4	1	367608	35570.6	21492	18156.4	5356.11
G5	1	377622	36783.4	22356.5	18938	5384.51
G6	1	421294	42517.6	26405.7	22711.1	6417.18
G7	1	315221	31824.8	19942.1	25865.3	7076.6
G8	1	284681	28047.1	17155.5	14500.6	4087.09
G9	1	260982	25185.8	14995.7	12722.5	3476.66
G10	1	375705	34582.6	19686.3	16549.7	4011.25
G11	1	360639	33887.7	19927.5	16508.6	4239.12
G12	1	421228	36801.4	20381.3	17702.1	4589.92
H1	1	672442	60644.2	32968.9	28424.9	7752.13
H2	1	304447	26224	14340.4	12562.2	3261.54
H3	1	304701	27164.7	15350.5	13034.5	3756.93
H4	1	355130	33676.9	19671.6	17105.4	5009.76
H5	1	453173	44244.2	26384.2	23017.1	6696.41
H6	1	464239	45660.9	27810.9	23793	6883.01
H7	1	325320	31298.3	18580.9	16110	4210.91
H8	1	305441	28857.1	17033.3	14946.2	4132.75
H9	1	281272	26354.6	15098.4	13375.4	3949.63
H10	1	491037	45208.2	25811.6	22235.9	6332.26
H11	1	423776	39015.4	21644.2	18995.7	5831.93
H12	1	458034	40128.6	20463.4	17676.5	5278.83
A1	2	373883	93493.9	59213.8	522074	3091.86
A2	2	213330	55922.5	39112.4	328441	1385.54
A3	2	196514	50622.9	38671.2	319461	1580.17
A4	2	299661	61990	52342.4	384217	2505.07
A5	2	299203	70268.7	58675	423435	2284.41
A6	2	240325	53937.1	51525.3	376527	2010.85
A7	2	444921	60088.1	59925.4	368079	4699.06
A8	2	291048	57439.6	62234.5	452743	3183.11
A9	2	251260	52422.3	54003.6	406353	2361.68
A10	2	472673	80334.4	70802.5	496131	4712.15
A11	2	434994	88707	71439.9	570031	354.926
A12	2	454473	97012.4	68699.1	562360	3996.31
B1	2	673340	95273.2	68863	446284	7028.42
B2	2	258365	50547.9	43559	334107	2677.15
B3	2	209677	45679.1	41310.1	311320	1931.17
B4	2	250812	57368.1	51095.4	364086	8998.77
B5	2	271121	63918	59388.5	407444	2666.05
B6	2	254359	59389.7	56864.7	382288	2426.26
B7	2	294547	48401.4	53309.9	341930	3348.28
B8	2	280383	56509.9	60541.9	409816	2955.38
B9	2	207348	44595.1	47533.1	341674	1895.71
B10	2	336235	77594	65361.7	458608	3075.44
B11	2	345011	82977.2	68990.3	516014	2966.18
B12	2	352072	89772.1	63955.4	510317	3157.16
C1	2	457318	103665	74530	570159	4463.44
C2	2	235723	58963.6	47423.1	357846	2390.97
C3	2	212094	53095.9	46817.8	336509	2035.84
C4	2	236593	54857.6	51286	344609	2793.51
C5	2	324268	75575.2	69577.6	443718	3331.44
C6	2	261661	61783.7	61536.8	395962	2383.96
C7	2	242670	60156.9	61906.8	401383	2547.95
C8	2	261162	61044.3	64907.2	425103	2410.71
C9	2	192333	46146.2	49537.6	340507	1345.6
C10	2	507711	75998.7	75461	454479	5370.14
C11	2	360714	75834.6	72221.4	521866	3639.7
C12	2	336743	71989.9	59997.9	461998	2946.98
D1	2	535999	113414	85988.4	629541	5351.17
D2	2	257307	64595.1	52030.6	375747	1713.93
D3	2	273295	63633.5	58309.5	395823	2100.89
D4	2	279817	67248.7	62568.8	402320	2897.78
D5	2	374597	90126.5	84352.6	511367	4069.86
D6	2	309775	74062.2	73968.7	450052	3043.78
D7	2	483302	81802.5	84344.5	444662	5619.27
D8	2	342336	67960	79307.2	479539	3541.57
D9	2	213065	48301	56672.7	367229	2427.48
D10	2	346776	78720.1	77675.4	509921	3140.28
D11	2	335757	81675.4	74813.3	530290	2144.68
D12	2	351963	89112.5	73237.8	556198	3117.6
E1	2	538144	121848	88502.2	638452	5073.67
E2	2	278344	67183.4	58717	419766	2374.04
E3	2	283570	67559.5	63381.5	418979	2389.96
E4	2	365954	83843.6	82916.9	507241	3529.91
E5	2	400237	95325.4	92757.1	548836	3928
E6	2	333080	79808.2	81260.2	475383	3425.29
E7	2	287374	62751.8	75035.7	444397	3200.03
E8	2	358230	84206.2	93883.7	564360	3616.68
E9	2	243532	59325.9	65879.8	419253	2308.98
E10	2	635129	87793.9	92335.9	508844	7439.84
E11	2	412525	75605.1	82942.5	566016	4231.82
E12	2	424651	79137.8	78780.8	583057	4364.92
F1	2	508816	128984	89314	627770	4799.05
F2	2	263930	70295.6	58169.3	416478	1787.06
F3	2	279754	72336	66702.2	436157	2237.17
F4	2	354185	82287.1	80332.4	498249	3245
F5	2	452344	106621	104922	633774	4223.92
F6	2	381099	90911.8	90151.7	530504	3974.63
F7	2	298700	72584.2	84979	515387	3168.23
F8	2	381666	92081.3	100463	606793	4470.14
F9	2	274812	68387.5	74166.6	476396	2626.12
F10	2	556898	95913.5	96966.6	590487	6026.43
F11	2	452422	101719	95238.1	662421	2968.54
F12	2	409034	94292.4	80206.6	611286	3817.79
G1	2	523099	47266.2	27091.9	23281	6360.47
G2	2	264850	23793.5	13026.6	11126.6	2369.12
G3	2	299093	27642.7	15872	12061.6	2660.57
G4	2	366538	35622.4	21263.5	18215.8	5288
G5	2	376005	36725.2	22219.2	19108.7	5459.34
G6	2	419252	42277.5	26242.3	22483.5	6462.54
G7	2	313893	31688.9	19835.1	25579.4	6762.75
G8	2	284314	27914.7	17224	14220.8	3871.37
G9	2	260119	24876.3	14884.6	12533.4	3521.29
G10	2	374479	34428.8	19441.9	16214.1	3833.39
G11	2	361407	34024.2	19731.7	16784.1	4462.74
G12	2	419547	36984.4	20369.6	17648.4	4913.19
H1	2	670022	60067.7	32774.2	27853.3	8076.62
H2	2	302952	26034.8	14211.1	12140.4	3497.36
H3	2	302315	27002.9	15202.6	12980.4	3834.16
H4	2	352990	33386.6	19607.9	17082.6	5287.25
H5	2	451400	43809.5	26364.2	22610.7	6584.53
H6	2	462239	45436.5	27662.8	23903.4	6891.95
H7	2	322682	31206.8	18477	15763.8	4611.03
H8	2	304664	28759.5	16991.6	14990.1	4321.06
H9	2	279533	26148.9	15140.9	12977.5	4266.54
H10	2	488612	45043	25708.6	22145.9	6258.17
H11	2	421998	38599.7	21486.1	19093.3	5503.72
H12	2	455844	39598.3	20390.9	17898.5	5264.66
A1	3	372243	93196.8	58808.4	518827	2921.39
A2	3	214158	56290.5	38854.4	327998	1689.2
A3	3	196945	50614.6	38590.1	318589	1288.85
A4	3	300249	62523	52263.7	383966	2422.7
A5	3	299384	70544.5	58661.1	422718	2397.01
A6	3	240075	53857.1	51591.4	375504	1887.23
A7	3	444798	60028.8	60061.3	367211	4450.51
A8	3	291737	57917.6	62307.4	451923	3213
A9	3	251900	52749.8	53904.1	405657	2406.99
A10	3	472596	81006.3	70738.7	495070	4891.3
A11	3	434623	88748.8	71297	568029	171.226
A12	3	452713	97163.9	68619.6	559631	4169.04
B1	3	671171	94926.4	68338.5	443730	7101.69
B2	3	258964	50870.5	43735.5	333325	2711.5
B3	3	211794	46392.3	41558.2	311231	1699.71
B4	3	251593	57826.9	51211.9	364169	9352.34
B5	3	272672	64220.9	59679.8	407155	2727.56
B6	3	254843	59873.3	57149.7	382724	2479.53
B7	3	294801	48852.9	53461	342079	3510.38
B8	3	281569	56905.2	60716.9	409516	2847.18
B9	3	207175	44823.8	47723	340179	1834.11
B10	3	335623	77488.2	65380.5	456632	2996.43
B11	3	343593	83106.6	68910.6	514211	3062.66
B12	3	351384	89563.3	63844.4	507579	2684.7
C1	3	457385	103733	74572.7	568208	4608.5
C2	3	236247	59382.1	47405.2	357708	2451.06
C3	3	213232	53441.2	46946.4	336225	1941.26
C4	3	237736	55331.2	51380.3	344547	2585.47
C5	3	325383	76432.4	69617.8	443742	3522.98
C6	3	263584	62334.2	61788.8	396757	2700.33
C7	3	243908	60804.2	61976	401512	2767.05
C8	3	261723	61123.1	65088.1	425588	2398.34
C9	3	192544	46456.6	49528.7	340835	1341.47
C10	3	509074	76431.6	75685.6	455101	5453.6
C11	3	362050	76272.2	72258.6	521270	3744.89
C12	3	337293	72464.5	59839.7	460800	2671.28
D1	3	536811	113415	85902.5	627891	5962.45
D2	3	257569	64944.1	51868.1	374900	1912.2
D3	3	273613	64084.3	58492.9	395797	2472.23
D4	3	280802	67886.5	62834	402149	2784.28
D5	3	377007	90954.4	84726.9	512031	3871.11
D6	3	310886	74782.9	74181.7	449873	2929.59
D7	3	483728	82164.5	84487.3	443769	5740.1
D8	3	344312	68697	79549.1	480666	3511.46
D9	3	213635	48571.3	56880.6	366689	2435.07
D10	3	347900	79450.8	78072.8	510666	3104.14
D11	3	336072	81788.2	74863.5	529680	1966.52
D12	3	351863	89384.2	73227.7	554940	3291.57
E1	3	539626	122098	88478.2	637626	5565.73
E2	3	280097	67820.1	58857.6	420321	2765.73
E3	3	284737	68194.5	63689.7	419564	2627.32
E4	3	367768	84463.5	83045	508259	3803.68
E5	3	402526	96255	93088.4	550397	3726.62
E6	3	334925	80941.5	81566.8	476363	2978.94
E7	3	288100	63175.1	75174.3	443933	3133.67
E8	3	359858	85017.4	94311.4	565811	3758.09
E9	3	244344	59393.3	66145.1	419188	2275.93
E10	3	635150	87776.2	92414.8	509397	7250.48
E11	3	413640	76150.2	83034.5	566311	4509.04
E12	3	423813	79284.4	78507.3	580063	4237.4
F1	3	509587	129040	89224.8	626918	4638.89
F2	3	265082	71271.1	58297.8	417377	2091.34
F3	3	280747	73273.9	67020.4	436688	2340.42
F4	3	355462	82977.1	80771.2	499757	3733.39
F5	3	454380	107332	104937	635183	3863.8
F6	3	382849	91766.9	90477.9	531292	3538.47
F7	3	299700	72977.3	85104.6	514459	3423.56
F8	3	383215	92896.6	100687	607168	4777.79
F9	3	276758	69042.1	74672	476440	2372.68
F10	3	558110	96092.3	97154.8	591754	5495.63
F11	3	454600	102352	95306.6	662248	2974.67
F12	3	409395	94942.1	80227	609591	3805.76
G1	3	521508	47218.4	27228.3	23051.5	6602.79
G2	3	264343	23618.5	12953	11318	2767.86
G3	3	298619	27354.6	15800.1	12317.9	3593.73
G4	3	365220	35241.4	21401.4	17904.3	5014.57
G5	3	375710	36666.9	22269.8	18819.8	5254.98
G6	3	418421	42191.2	26298.9	22216.4	6744.93
G7	3	312328	31634	19657	25638.8	7037.37
G8	3	283636	27870.2	17188.3	14413.8	3991.86
G9	3	259338	24713.4	15022	12354.2	3600.43
G10	3	373594	34476.8	19445.2	16484.1	4188.03
G11	3	360041	33516.7	19808.8	16795	4432.52
G12	3	416683	37054.5	20256.1	17503.6	4708.37
H1	3	666347	59422.6	32598.4	27993.2	7697.76
H2	3	302128	26251.2	14304.3	12237.4	3285.58
H3	3	301918	26814.5	15066.8	13170.4	3961.29
H4	3	351589	33376.2	19568.5	16996.2	5311.7
H5	3	450091	43889.7	26352.2	22379.2	6609.06
H6	3	461277	45269.6	27654.8	23563.2	6807.04
H7	3	320919	30961.1	18344.4	15878.9	4357.81
H8	3	304023	28624.7	17142.6	14731.1	4169.85
H9	3	278278	26243.7	14934.7	13206.8	4412.15
H10	3	486662	44925.6	25685	21993.1	6440.93
H11	3	420052	38898.3	21400.3	18446.3	5676.46
H12	3	452311	39353.6	20257.1	17929.7	5269.97
A1	4	372008	93254.2	58829.3	517118	3227.37
A2	4	214444	56448.7	38979	327644	1449.25
A3	4	197629	50936.9	38796.1	318885	1479.14
A4	4	301330	63079	52404.3	383790	2393.22
A5	4	300902	70814.6	58840.8	422431	2230.95
A6	4	240921	54170.2	51486.3	375078	2126.44
A7	4	445041	60590.5	59984.9	366209	4604.15
A8	4	291731	58221	62347.1	451039	3095.11
A9	4	252937	53211.5	54165.3	405618	2364.57
A10	4	472679	81512.2	70841.4	494846	4925.52
A11	4	435719	89166.3	71270.7	567174	275.55
A12	4	452917	97553.3	68277.5	557448	4113.77
B1	4	669736	95051.3	68482.6	442475	7394.76
B2	4	259397	51777.3	43736.7	333194	2841.14
B3	4	212502	46806.9	41728	311683	1656.55
B4	4	252564	58315.3	51384.5	364572	9070.34
B5	4	273322	64830.9	59891.8	407770	2766.32
B6	4	256161	60419.5	57222.6	382927	2665.17
B7	4	295990	49321.1	53533.6	342177	3196.12
B8	4	282896	57150.2	60855	409695	2847.98
B9	4	207987	45338.3	47594.8	340388	1724.04
B10	4	336819	77906.2	65426.9	456278	3345.72
B11	4	345179	83454.9	69090.5	514134	2962.07
B12	4	351923	89721.4	63624.7	506419	3098.94
C1	4	457053	104233	74454.5	565454	4479.42
C2	4	237884	60013.1	47631.9	357662	2374.4
C3	4	214739	54109.5	47063.7	337062	1793.3
C4	4	238917	56025.6	51446.4	344848	2627.47
C5	4	327461	76887.3	69781.4	444786	3529.25
C6	4	264688	62932.7	62117.9	396985	2224.98
C7	4	245226	61484.2	62055.6	401883	2856.5
C8	4	263157	61677.9	65213.7	426796	2307.62
C9	4	193838	46820.1	49658.1	341003	1377.01
C10	4	510220	77185.7	75941.2	456243	5584.88
C11	4	363659	76861.3	72332.1	521850	3743.87
C12	4	337535	72449.5	59972.4	459760	2598.79
D1	4	537593	114097	86196.1	627478	5591.49
D2	4	259428	65416.6	52046.8	375144	1943.4
D3	4	275784	64557.9	58849.9	396575	2430.52
D4	4	281997	68440.7	63117.6	403779	2857.31
D5	4	378130	91909.2	85175.9	513803	4066.84
D6	4	312348	75202	74593.5	450265	3351.81
D7	4	484225	82371	84635	443945	5628.11
D8	4	346019	69596.1	80007.9	482247	3546.59
D9	4	214417	49182	56952.6	367148	2539.62
D10	4	348813	79667.1	78099.4	510980	3239.87
D11	4	337486	82384.1	75269.3	531027	2093.64
D12	4	352491	89897.5	73034.1	553170	3145.28
E1	4	540693	122826	88729.6	637244	5258.19
E2	4	281743	68793	59306.3	421354	2498.15
E3	4	286509	69025.7	63931.6	420485	2542.39
E4	4	369126	85397.6	83416.1	508649	3358.24
E5	4	404191	97265.6	93352.7	551693	3757.13
E6	4	336289	81966	81664.1	477089	2785.55
E7	4	289731	63873.2	75180.2	444964	3486.95
E8	4	362076	85972.9	94374.9	565998	3908.66
E9	4	245261	60161.2	66120.5	419447	2466.89
E10	4	635925	88385.9	92541.7	509736	7289.97
E11	4	414794	77120	83162	566219	4242.58
E12	4	422961	79607.5	78402.9	578943	4295.88
F1	4	509538	129355	89441	625407	4628.51
F2	4	265743	71674.4	58600.8	418455	2117.09
F3	4	282528	73957.1	67089.6	437314	2656.44
F4	4	356686	83354.6	80951.6	500036	3378.67
F5	4	456268	108040	105219	635817	3817.72
F6	4	384662	92358.7	90557.4	532357	3764.46
F7	4	300590	73329.2	85221.6	514449	3276.29
F8	4	385400	93626	101236	608236	4451.92
F9	4	278302	69437.8	74849.8	477672	2479.45
F10	4	559430	97087	97324.9	592436	5434.87
F11	4	455709	103031	95667.9	663739	2817.35
F12	4	410060	95176.2	80035.1	609316	3969.06
G1	4	520168	47320.5	27147.7	22822.1	6661.48
G2	4	264013	23475.5	12960.5	11131.6	2797.31
G3	4	297658	27324.2	15749.7	12147.1	3486.4
G4	4	364336	35410.4	21142.3	18110	4869.46
G5	4	374961	36665.9	22101	18986.6	5645.48
G6	4	417212	42289.1	26215.9	22317.7	6611.61
G7	4	311516	31409.1	19673.6	25636	6808.52
G8	4	283745	28023.4	17135.2	14228.6	3767.39
G9	4	258633	24845.9	15080.6	12369.3	3498.98
G10	4	373021	34327.3	19507.1	16192.2	4105.09
G11	4	359573	33760.2	19870	16935.8	4502.63
G12	4	416242	36887.2	20140	17171.4	4919.36
H1	4	662913	59344.3	32702.5	28029.4	7798
H2	4	300926	26097.9	14267	12300.5	3232.92
H3	4	300468	26990.2	15040.4	13033.3	3647.62
H4	4	350146	33152.1	19662.2	16960.2	5259.03
H5	4	449058	43349.8	26165.3	22667.4	6716.04
H6	4	460449	45348.2	27531.5	23570.4	6603.25
H7	4	319703	30823.3	18338.6	15755.1	4351.05
H8	4	303790	28588.5	16983.3	14924.7	4278.39
H9	4	276810	25924.9	14846.4	13287.9	3932.5
H10	4	485666	44889.4	25563.3	22489.8	5950.69
H11	4	418845	38534	21318.6	18451.6	5784.09
H12	4	451286	39578	20346.3	17494.8	5411.69
A1	5	372484	93669.5	58806.9	515765	3297.3
A2	5	215399	57055.2	39122.3	327453	1541.62
A3	5	198189	51498.8	38888.4	318666	1039.71
A4	5	302238	63554.3	52395.5	383975	2488.6
A5	5	301791	71284.3	58915.1	423004	2103.76
A6	5	241553	54330.2	51653.5	375209	1763.61
A7	5	445096	60925.1	59946.3	366510	4798
A8	5	293555	58676	62493.7	452010	3297.69
A9	5	254009	53554.3	54268.6	406275	2404.1
A10	5	473709	81958.4	70900.2	495113	4898.34
A11	5	436670	89914.3	71303.9	567368	0
A12	5	450973	97874.7	68155.4	555943	4408.1
B1	5	670329	95035.1	68440.4	442333	7590.59
B2	5	260494	52147.8	43896.1	333428	2575.2
B3	5	213812	47259.9	41776.8	312229	1643.8
B4	5	253327	58846.2	51522.6	364750	9324.74
B5	5	273626	65220.5	60110.5	408078	2693.85
B6	5	256556	60832.8	57294.6	383341	2297.11
B7	5	296539	49514.5	53748.2	342750	3719.13
B8	5	284305	57597.8	61118.7	410867	2941.06
B9	5	208855	45799.1	47839.8	340163	1898.99
B10	5	337360	78607.7	65443	456761	3014.38
B11	5	345818	84024.3	69244.9	514888	3092.42
B12	5	352241	90188.6	63546.2	504765	2652.24
C1	5	458221	104739	74492.3	565072	4687.17
C2	5	239346	60476.3	47747.4	358614	2243.87
C3	5	215344	54318.9	47386.5	337342	1738.98
C4	5	240175	56386	51675.7	345024	2759.33
C5	5	328751	77486.8	70082.7	444561	3224.03
C6	5	265716	63377.5	62260.8	397827	2553.39
C7	5	246866	62208.9	62284	402631	2775.26
C8	5	264888	62044.3	65477.8	427325	2375.25
C9	5	194753	47060.6	49913	341491	1470.41
C10	5	511136	77390.8	76084.8	456926	5577.05
C11	5	364874	77510.7	72539.5	522434	3722.42
C12	5	337788	72862.7	59913.8	459119	2504.33
D1	5	539307	115062	86230.8	627002	5476.87
D2	5	260378	66367.7	52304.7	375958	2120.53
D3	5	276877	65291.5	58855.9	397126	2440.69
D4	5	283754	68961.3	63179.5	403765	2586.88
D5	5	380986	92469.4	85252.6	513942	4232.29
D6	5	313809	75964.9	74688.6	450479	2920.96
D7	5	484643	82939.4	84726.3	444298	5751.89
D8	5	347768	70025.4	80249.9	482927	3600.11
D9	5	215641	49545.4	57029.7	367600	2342.32
D10	5	350563	80277.7	78372.9	512030	3081.23
D11	5	339024	82753.2	75345.6	532003	2233.28
D12	5	352835	90030.6	73164.9	553039	3563.4
E1	5	542749	123631	88801.4	636864	5158.42
E2	5	282149	68996.2	59191.3	422153	2689.44
E3	5	287625	69811.5	64163.8	421713	2401.94
E4	5	370406	86042.9	83572.9	509541	3547.86
E5	5	406576	97878.7	93600.9	552399	3786.63
E6	5	338485	82414.7	82204.2	477255	3135.21
E7	5	291356	64520.3	75343.4	444861	3251.75
E8	5	363402	86460.4	94805.6	567419	3686.88
E9	5	246901	60795.4	66109.6	419639	2399.87
E10	5	636375	88842.4	92655.3	510279	7293.56
E11	5	416265	77443.3	83470.8	567868	4373.57
E12	5	422722	80162.1	78423.6	579389	4188.67
F1	5	510849	130396	89360.9	624924	4902.86
F2	5	266116	69961.5	58436.9	419252	1970.8
F3	5	283390	74608.7	67174.7	437955	2659.57
F4	5	358234	84354.1	81290	501077	3413.62
F5	5	458429	109356	105613	637658	3833.79
F6	5	385903	92984.2	90799.6	533066	3546.39
F7	5	301501	73888.7	85362.3	514749	3298.29
F8	5	387233	94121.6	101238	608999	4541.99
F9	5	279137	70049.9	74858.4	477647	2600.24
F10	5	560943	97365.7	97750.3	594076	5871.88
F11	5	457417	103694	95795.6	663844	2936.87
F12	5	409757	95398.8	79987.2	606915	4004.29
G1	5	519182	47057	27079.5	22941.5	6690.08
G2	5	264181	23578.9	13024.1	11056.1	2705.29
G3	5	296894	27108.1	15774.9	12158.5	3406.85
G4	5	363765	35255	21189.6	18115.9	4984.96
G5	5	374238	36766.5	22166.8	18936.1	5460.3
G6	5	416843	41999.2	26139.2	22257.8	6612.54
G7	5	310194	31323.6	19649.6	25616.6	6770.23
G8	5	283709	27814.4	17119.8	14190	4135.68
G9	5	257887	24809.5	15004.8	12367.3	3580.14
G10	5	372024	34484.4	19473.4	16151.8	4047.26
G11	5	359320	33998.7	19748.8	16702.8	4819.33
G12	5	415736	36714.1	20278.2	17403.7	4799.68
H1	5	660241	58888.1	32451.6	27822.2	7949.2
H2	5	301088	25660.2	14253.1	12259.6	3339.38
H3	5	299602	26494.7	15006.8	12648.3	3723.66
H4	5	349098	33341.2	19469.2	16940.3	5197.89
H5	5	448109	43558.1	26162.3	22328.6	6764.13
H6	5	458717	45295.2	27447.2	23507.6	6778.44
H7	5	318795	30726.9	18188.6	15669.3	4233.14
H8	5	303295	28789.2	17042.6	14804.9	3940.72
H9	5	276128	25870	14824.1	13130	4028.86
H10	5	484313	44757.8	25563.3	22129.9	6270.52
H11	5	417793	38694	21447.2	18693.6	5324.34
H12	5	449684	39184.3	20154.8	17421.4	5126.49
A1	6	372925	93956.7	58803.9	514708	2877.67
A2	6	216469	57326.9	39179.1	327146	1437.57
A3	6	199036	51614.9	38927	318993	1255.5
A4	6	303392	63847.4	52545.8	383172	2646.41
A5	6	303478	71827.7	59168.2	422842	2122.4
A6	6	241889	54960.3	51803.3	374779	1726.68
A7	6	444929	61160.9	59968.9	366679	4806.04
A8	6	294014	59046.9	62511.9	451601	3253.68
A9	6	254940	54112.1	54382.4	406488	2502.42
A10	6	474186	82438.1	71029.8	494968	4563.2
A11	6	437682	90340.2	71478.8	566757	464.919
A12	6	451693	98341.4	68084.4	553733	4156.6
B1	6	670314	95301.1	68365.7	440968	7009.77
B2	6	261850	52545.1	43937.3	333660	2766.9
B3	6	214542	48112.3	41805.3	312433	1684.01
B4	6	254398	59067.1	51629.6	365403	9250.58
B5	6	275205	65473.1	59989.7	407772	2667.73
B6	6	257422	61133.3	57406.7	383135	2619.97
B7	6	297601	49882.4	53752.7	342993	3399.51
B8	6	285027	57985.5	61269.4	411272	3126.41
B9	6	209406	46039.3	47841.4	340462	1754.43
B10	6	338944	79009.6	65455.5	457123	3221.81
B11	6	347138	84272.5	69370.6	515650	3031.87
B12	6	353413	91084.2	63844.4	504750	2716.05
C1	6	460011	105603	74433.8	564323	4545.8
C2	6	240471	61165.1	47819.9	358837	2377.51
C3	6	216689	54794.5	47422.2	337771	2017.11
C4	6	241069	56681.3	51689.3	345194	2838.44
C5	6	329871	78168.3	70145.3	444587	3466.59
C6	6	266595	63952.8	62421.3	397839	2522.07
C7	6	248002	62923	62380.3	402604	2643.14
C8	6	265311	62393.4	65564.2	427665	2418.96
C9	6	195245	47706.8	49998.5	342019	1369.57
C10	6	512461	77970.3	76306	458106	5529.24
C11	6	365802	78076.8	72712.6	522613	3851.1
C12	6	339558	73461.2	60126.2	459608	2803.09
D1	6	540091	115757	86309.5	626334	5553.28
D2	6	261472	66689.9	52595	376521	1985.67
D3	6	277978	65669.2	59022.3	397182	2653.33
D4	6	284843	69640	63268.5	404137	2550.36
D5	6	382213	93490.4	85519.8	514103	4182.86
D6	6	315201	76860.6	74879.8	450527	2761.67
D7	6	484695	83394.9	84806	443900	5982.75
D8	6	349266	70844.3	80465.9	483560	3320.8
D9	6	216282	49983.8	57056.6	368139	2548.05
D10	6	351446	80716.3	78332.1	512182	3157.02
D11	6	340299	83410.9	75684.8	532511	1802.81
D12	6	353494	90697.4	73094.9	552497	3197.67
E1	6	543335	124451	88921.1	636790	5091.44
E2	6	283997	69950.1	59471.4	422498	2500.43
E3	6	289090	70424.4	64335.1	421998	2448.76
E4	6	372894	86752.8	83780.5	510358	3682.5
E5	6	408018	98736.7	93889.2	552969	3533.37
E6	6	339145	83148.1	82190.6	477291	3339.34
E7	6	292175	64943.5	75403.3	444993	3347.39
E8	6	365252	87446.2	95028.5	567639	3680.77
E9	6	247345	61107.5	66548	419892	2414.56
E10	6	637004	88894.6	92906.3	510853	7449.72
E11	6	417250	78135.9	83695.8	568716	4262.32
E12	6	423239	80543.5	78353.2	578305	4295.88
F1	6	512800	131245	89244.5	624262	4807.95
F2	6	265964	70042.9	58704.5	418640	2028.15
F3	6	284389	75329.7	67458.8	437970	2578.22
F4	6	359263	84974.2	81263.7	500892	3530.84
F5	6	459909	110048	105999	637444	3833.79
F6	6	387213	93651.1	91158.2	533280	3782.93
F7	6	302304	74141.9	85445.3	514586	3298.29
F8	6	388866	94858.8	101927	609658	4497.46
F9	6	279958	70705.5	75193.6	478598	2771.72
F10	6	561686	97875.3	97569.5	594562	5666.17
F11	6	459379	104242	95917.1	664771	3139.13
F12	6	410004	95981.6	80007.6	608222	3813.49
G1	6	518091	47002.7	27037.7	23102.7	6495.93
G2	6	263551	23241.8	12755.9	11185.8	3019.38
G3	6	297156	27352	15609.8	12284.7	3169.45
G4	6	363046	35300	21262.5	18082.3	5197.19
G5	6	374608	36545.6	22195.4	18887.5	5241.55
G6	6	415751	41998.3	26052.5	22323.2	6422.73
G7	6	309956	31261.6	19677.3	25521	6754.35
G8	6	283477	28067	17305.1	14395.5	4188.15
G9	6	257172	24617.3	14903.8	12399.5	3870.28
G10	6	371308	34414.6	19589.6	16365	4128.01
G11	6	359726	33599.6	19814.9	16767.1	4392.63
G12	6	414440	36516.7	20124.3	17564.8	4908.26
H1	6	660075	58863.3	32391.8	27744.5	7896.53
H2	6	300190	26057.1	14191.4	12022.4	3381.74
H3	6	298849	26721	15005.5	12659.2	3797.33
H4	6	348316	32950.7	19414.9	17030.4	5193.19
H5	6	447739	43338.8	26128.3	22566	6618.88
H6	6	458031	45013.4	27509.3	23537.2	6906.25
H7	6	318032	30481.2	18231.9	15694.6	4175.15
H8	6	302803	28707.4	16975.9	14905	4428.67
H9	6	275166	25556.6	14867.7	12853.7	4170.18
H10	6	484049	44710.1	25729.7	22085.5	6720
H11	6	417050	38735.4	21373.5	18760.4	5768.15
H12	6	449221	39131.3	20298	17505.8	5323.12
A1	7	373843	94263.6	58669.2	514075	3257.96
A2	7	217672	57774	39192.2	327174	1499.15
A3	7	200132	52114.5	38990.9	319094	1317.3
A4	7	304662	64382.2	52651	383251	2611.73
A5	7	304990	72481.5	59062.1	422580	2465.87
A6	7	243271	55343.3	51777	374695	1969.11
A7	7	444907	61109.5	60092.7	366381	4629.88
A8	7	294924	59595	62627.1	451809	3440.49
A9	7	256274	54728.1	54403.5	406989	2695.21
A10	7	475498	82892.4	71213.3	495130	4855.07
A11	7	439110	90715.9	71707.4	566781	299.363
A12	7	452547	98356.9	68141.2	552634	3786.27
B1	7	670476	95440.7	68447.2	441320	6991.12
B2	7	262560	53067.5	43901.8	333662	2878.82
B3	7	215636	48270.7	42001.5	312832	1414.3
B4	7	255021	59434.1	51815.1	364818	9403.22
B5	7	275932	65585.4	60038.7	408321	2844.68
B6	7	258156	61630.7	57436.4	383387	2516.66
B7	7	298158	50144.1	53947.9	343377	3377.34
B8	7	285924	58537.9	61436.5	411819	2817.75
B9	7	210114	46356.8	47921.2	340185	1652.58
B10	7	339347	79498.5	65588.6	456456	3281.97
B11	7	348517	84837.7	69318.5	514829	3279.22
B12	7	354669	91275.4	63689.7	504118	3172.83
C1	7	461952	106207	74547.1	564079	4653.98
C2	7	242287	61627.1	48068.6	358886	2663.43
C3	7	218760	55260.8	47357.4	337328	2350.48
C4	7	241544	57262.4	51855.5	345612	2940.03
C5	7	330981	78410.5	70369.7	444748	3214.19
C6	7	267946	64361.9	62562.6	398304	2182.42
C7	7	249183	63437.6	62575.2	403323	2661.2
C8	7	266434	63235.7	65711.8	427930	2614.42
C9	7	196092	47979.8	50014.8	342068	1624.15
C10	7	512875	78199.1	76404.1	458509	5755.28
C11	7	367646	78538.5	72708.6	523326	3587.62
C12	7	340073	74153.4	60038.8	459220	2731.7
D1	7	542481	116859	86486.2	625976	5752.94
D2	7	262483	67335.4	52394	376397	2101.41
D3	7	279085	66087.4	59240.9	398098	2442.73
D4	7	285506	70037	63489.2	404558	2842.51
D5	7	383396	93981.6	85679.9	514702	4142.5
D6	7	316740	77273.4	74999.6	451239	2938.23
D7	7	484711	83583.7	84688.4	443786	5886.48
D8	7	350257	71467.2	80571.1	484505	3631.89
D9	7	216610	50535.9	57337.3	368752	2497.46
D10	7	352504	81325.3	78498.5	512463	3184.35
D11	7	340949	83681.8	75706.1	533126	1805.69
D12	7	354177	91260.1	73026	551623	3288.61
E1	7	545191	125344	89015.6	637140	5084.61
E2	7	285263	70432.6	59436.8	422936	2351.27
E3	7	289962	70991.9	64513.8	422057	2372.54
E4	7	373400	87683.7	83861.2	510558	3740.85
E5	7	409689	99694.9	93959.2	553460	3717.46
E6	7	340587	83473.4	82299.6	478178	3071.72
E7	7	292367	65224.1	75678.6	445167	3164.9
E8	7	366431	88146.6	95117.2	567590	3599.38
E9	7	248262	61677.1	66423.1	419974	2498.11
E10	7	636851	88902.6	92990.6	511429	7332.15
E11	7	418303	78577.5	83593.8	568632	4459.69
E12	7	423363	80694.5	78564.5	578269	4260.15
F1	7	515159	131925	89546.9	624041	4861.34
F2	7	267834	70774.2	58866	420116	1901.75
F3	7	286120	75466.6	67565.2	438400	2392.57
F4	7	359968	85640.5	81575.8	501182	3624.41
F5	7	461662	110841	105853	638298	3794.14
F6	7	388036	94149.1	91205.4	534062	3560.46
F7	7	302648	74276.3	85503.8	514713	3100.33
F8	7	389648	95559.7	101737	610307	4531.87
F9	7	281362	71184	75203.2	478706	2396.4
F10	7	562574	98058.2	97856.6	595086	5114.04
F11	7	460724	105176	96418.6	666273	3157.52
F12	7	410784	96392.4	80112.4	606570	3940.69
G1	7	517828	46824.8	26873.5	23349.2	6202.43
G2	7	263917	23469.1	12981.7	11306.6	3208.32
G3	7	296217	27262.3	15558.2	12161.1	3183.34
G4	7	362310	35135.9	21085.1	18095.1	4990.88
G5	7	373960	36567.2	22187.8	18928.5	5254.98
G6	7	415648	41964.5	26075.3	22420.9	6412.55
G7	7	308972	31128.4	19594.3	25565.5	6706.71
G8	7	283617	27809.7	17308.9	14135.9	4222.16
G9	7	257163	24499	14817	12482	3493.9
G10	7	371524	34331.6	19384.4	16093.8	3983.97
G11	7	359281	33813.8	20075.6	16870.3	4471.2
G12	7	415210	36378	20039.5	17256.3	4518.36
H1	7	659162	58865.2	32507.9	27637.4	7585.63
H2	7	299456	26026.2	14080.8	12217.5	3148.2
H3	7	298481	26709.6	14941.9	12969.5	4208.43
H4	7	348009	32952.6	19435.5	16957.3	4964.61
H5	7	447578	43219.6	26024.4	22485.6	6498.16
H6	7	457362	44931.2	27320.3	23359.5	6869.6
H7	7	317257	30731.8	18212.7	15481	4420.63
H8	7	302647	28375.7	16861.9	14712.3	4457.43
H9	7	274348	25876.5	14771	13133.2	4171.25
H10	7	483192	44590	25369.6	22080.6	6486.61
H11	7	417535	38391.1	21452.6	18800.5	5717.65
H12	7	449080	39255.7	20140	17727.8	4947.58
A1	8	374609	94984.2	58839.8	512347	2682.43
A2	8	217582	57868	39262.2	326959	1567.1
A3	8	200112	52479.4	39084.3	318841	1575.27
A4	8	307040	64995.1	52804	383646	2500.74
A5	8	306909	72999.8	59382.2	423007	2216.37
A6	8	245267	55470.7	51780.2	374558	1971.51
A7	8	445571	61433.8	60088.6	366361	4615.41
A8	8	295298	59788.7	62661.9	451777	3433.01
A9	8	256652	54754.7	54610.1	407064	2593.03
A10	8	476081	83310.3	71308	495421	4980.87
A11	8	440307	91443.6	71882.3	567269	520.483
A12	8	451837	98666	68078.7	550628	4003.22
B1	8	669868	95941.7	68546.4	440486	7037.75
B2	8	262691	53214.7	44005	333882	2672.71
B3	8	216559	48706.4	41988.3	313079	1644.78
B4	8	256046	59874.1	51809.1	365100	9383.38
B5	8	276925	66126	60324.9	408751	2718.29
B6	8	259071	61833.1	57464.4	383369	2704.72
B7	8	298781	50344	53842.5	343327	3479.8
B8	8	286221	59009	61521.3	411736	2980.04
B9	8	210658	46506.6	47936	340717	1817.68
B10	8	340407	79652.8	65716.4	457239	3119.44
B11	8	349053	85511.4	69581.2	515865	3062.66
B12	8	354863	91371	63739.1	504078	2712.69
C1	8	463894	107042	74740.8	564165	4323.31
C2	8	245602	62582.9	47995.2	359409	2676.89
C3	8	220592	56093.8	47489.7	338235	1939.38
C4	8	242356	57383.2	51782.6	345658	2555.19
C5	8	332457	79214.9	70401.9	445113	3546.26
C6	8	268834	64801.3	62582.7	398501	2491.56
C7	8	250289	64052.3	62781.3	402812	2406.81
C8	8	267674	63350	65804.7	428641	2652.36
C9	8	196735	48279.1	50255.8	342796	1427.43
C10	8	513556	78403.2	76455.7	458399	5305.81
C11	8	368807	78995.2	72994.4	523523	3554.94
C12	8	340935	74474.1	60139.5	458951	2956.87
D1	8	543727	117836	86419.4	627359	5646.95
D2	8	264287	67931.4	52533.1	376343	1757.21
D3	8	280311	66599.5	59249.9	398816	2505.81
D4	8	287092	70482.2	63541.4	404493	2893.83
D5	8	384674	94610.8	85963.9	515296	4238.35
D6	8	317905	77669.2	75264.9	451745	3104.23
D7	8	484882	83725.4	84927.4	444368	5924.79
D8	8	351373	71685	80952.3	485084	3436.2
D9	8	217532	50866.3	57259.4	368696	2663.56
D10	8	353447	81559.1	78679.1	513106	3031.87
D11	8	342181	84290.4	75856.8	533530	2149.5
D12	8	355730	91553.3	72882.1	551931	3158.13
E1	8	548183	125789	89173.8	637236	5342.94
E2	8	287834	71035.8	59626.6	423799	2679.2
E3	8	291862	71239.8	64492.4	423262	2331.16
E4	8	374801	88235.9	83789.4	510990	3629.77
E5	8	411483	100235	94134.4	553460	3742.89
E6	8	342044	84480.4	82344.4	478493	3138.14
E7	8	294035	65664.3	75818.2	445535	3308.36
E8	8	367561	88499.8	95440	568600	3858.81
E9	8	249284	61760.8	66768.6	420073	2372.33
E10	8	636369	89235.3	92903.7	511604	7342.02
E11	8	419319	78932.8	84088.4	568752	4557.48
E12	8	423868	81193.4	78680.5	578758	4295.88
F1	8	516215	132914	89725.3	624165	4392.71
F2	8	270647	73797.9	59121.8	420310	1868.99
F3	8	287633	76255	67695.1	438480	2286.19
F4	8	360934	85866.2	81500.8	501683	3691.24
F5	8	463567	111229	106340	638590	3807
F6	8	389084	94619.3	91375.9	534187	3955.28
F7	8	304042	74641	85571.8	514837	3349.93
F8	8	391387	95926.3	102010	610669	4591.58
F9	8	282004	71394	75203.2	479603	2434.15
F10	8	562402	98831.7	98075.7	595292	5556.38
F11	8	462035	105709	96236.9	666887	2962.41
F12	8	411258	96624.6	80329.2	606678	3881.39
G1	8	517360	46879.2	26760.4	23045.3	6730.72
G2	8	263087	23562.3	12893.1	11362	2712.65
G3	8	295214	27338.1	15667.8	12243.9	3243.95
G4	8	361968	35206.2	21154.1	17867.7	4828.99
G5	8	373704	36461.9	22061	19093.4	5264.57
G6	8	415222	41969.8	26133.7	22187.8	6474.58
G7	8	308730	30971.9	19516.8	25478.3	6764.62
G8	8	284134	27610.1	17271.3	14367.5	4171.63
G9	8	257059	24716.5	14857.4	12318	3796.22
G10	8	370856	34449.5	19455	16160.5	4003.61
G11	8	359551	33793.4	19900.6	16855.7	4502.63
G12	8	413147	36631.2	20022.5	17409.9	5201.91
H1	8	656971	58659.1	32321.8	27525.1	7509.18
H2	8	299681	25804.9	13996.9	12080.8	3305.04
H3	8	297709	26516.2	14880.6	12970.7	3551.38
H4	8	347110	33050	19343.7	17247.7	5032.34
H5	8	446651	43301.7	26188.3	22428.9	6709.17
H6	8	456635	45113.2	27280.4	23561.4	6592.53
H7	8	316646	30566	18167.5	15533.7	4169.35
H8	8	302487	28607.1	16998.1	14801.2	4484.33
H9	8	274210	25498.5	14649.8	12944.4	3959.26
H10	8	482785	44897.2	25604.3	21919.1	6259.4
H11	8	416643	38424	21344	18495.7	5497.08
H12	8	449375	39237.4	20216.2	17415.9	5007.8
A1	9	375144	95358.4	58839.8	511934	3185.11
A2	9	218146	58346	39453.5	326454	1554.36
A3	9	201417	52784.2	39074.1	319200	1610.58
A4	9	308423	65540.5	52884.5	383468	2623
A5	9	309979	73591.9	59168.2	422451	2399.44
A6	9	247729	56089.1	51772.2	374330	2216.35
A7	9	445762	61691	60198.8	366749	4832.58
A8	9	296295	60277.5	62764.6	451707	3494.45
A9	9	257108	55346.9	54636	407174	2428.2
A10	9	476426	83915.4	71303	495291	4918.47
A11	9	441922	91669.1	71878.9	566713	571.511
A12	9	452537	98958	68057.4	550266	3765.54
B1	9	669965	96109.2	68267.9	440255	7357.46
B2	9	263913	53543.1	44117.3	333490	2650.55
B3	9	217428	49422.7	41945.6	313737	1701.67
B4	9	256571	60391.4	51750.4	365840	9633.47
B5	9	277504	66220.1	60299.6	408179	2773.06
B6	9	259816	62017	57679.8	383312	2511.81
B7	9	298321	50417.4	54097.5	343249	3312.35
B8	9	287218	59130.4	61652.3	411873	3054.02
B9	9	211250	46980.4	47968	340970	1788.93
B10	9	341278	80356.1	65669.9	456633	3307.11
B11	9	349977	85760.6	69516.8	516152	3165.29
B12	9	356662	92066	63769.3	503927	3154.92
C1	9	468781	108175	74955.1	563848	4918.27
C2	9	249081	63181.2	48195.7	359967	2300.84
C3	9	224449	56773.3	47761.8	338284	1855.1
C4	9	243387	57698.3	51928.4	345653	2774.96
C5	9	333306	79544.5	70362.5	444635	3139.9
C6	9	269217	65042.8	62741.6	398631	2619.23
C7	9	250996	64824	62951.6	403516	2716.18
C8	9	268402	63691.9	65774.6	428593	2560.81
C9	9	197511	48402.9	50281	342738	1310.89
C10	9	514399	78674.4	76600.2	459319	5589.22
C11	9	369675	79306.4	73180.7	523933	3523.28
C12	9	341558	74427.8	60357.5	459257	2474.67
D1	9	545985	118183	86751.2	627184	5221.76
D2	9	266221	68202.2	52663.1	376209	2094.36
D3	9	281872	67022.7	59330.1	398650	2382.7
D4	9	287709	70976.4	63714.7	404999	2909.62
D5	9	385925	95057.8	86071	515227	4394.73
D6	9	318880	77953.7	75538.8	451396	3040.9
D7	9	485840	83832.7	85044.9	444379	5827.54
D8	9	352064	72130.5	80994	485553	3533.21
D9	9	218210	50871.3	57545.2	368072	2484.81
D10	9	354218	81861.8	78713.6	512927	3346.52
D11	9	343175	84657.5	76274.2	533342	2009.86
D12	9	356328	91619.8	73189.2	551511	3112.66
E1	9	550291	126589	89099.4	636285	5368.91
E2	9	290094	71454.6	59603.1	423313	2407.06
E3	9	295398	71750.3	64808.1	423227	2332.25
E4	9	376444	88788.1	84058.9	510825	3747.58
E5	9	413559	100754	94263.5	553828	3675.76
E6	9	343520	84805.7	82470.9	478878	3336.41
E7	9	294435	66041.2	76028.6	445103	3260.54
E8	9	368842	89052.1	95349.2	568584	4018.53
E9	9	249666	62063.8	66709.4	420443	2168.52
E10	9	637548	89301.6	92942.7	511552	7126.63
E11	9	420138	79239.1	84025.6	568744	4462.38
E12	9	423850	81422.1	78781.6	578080	4416.09
F1	9	519050	133764	89858.4	623138	4885.07
F2	9	271751	72717.9	59157.2	420239	1969.63
F3	9	289532	76752.9	67730.2	438398	2343.55
F4	9	361452	85939.2	81609.3	501215	3640.86
F5	9	464122	111991	106629	638733	3940.97
F6	9	389702	95107.2	91432.7	534874	3592.99
F7	9	304172	75057	85623.7	514568	3238.99
F8	9	392243	96363.3	102145	610523	4489.37
F9	9	282514	71877.8	75505.2	478971	2602.4
F10	9	563538	99268.9	98077.8	596684	5576.63
F11	9	463055	106281	96397.9	665809	3183.06
F12	9	411949	96607.4	80395	607334	3850.45
G1	9	515792	47009.3	27025.3	22995.7	7120.53
G2	9	263446	23433.3	12888.1	11338.1	2988.7
G3	9	295074	27277.5	15506.5	11925.2	3209.86
G4	9	361609	35015.7	21044.8	18157.4	4986.93
G5	9	373685	36621.8	22097.2	18865.5	5405.61
G6	9	414874	41864	25983.1	22329.7	6659.75
G7	9	308521	31023.1	19557.4	25494	6943.03
G8	9	283758	27887.2	17332.1	14122.4	4236.74
G9	9	256379	24586	14885.7	12267.7	3384.34
G10	9	370932	34102.5	19549.4	16070.9	4242.59
G11	9	359757	33927.3	20001	16972.2	4746.8
G12	9	413683	36319.4	19866	17561	4714.54
H1	9	655236	58848.1	32272.3	27943.1	7843.87
H2	9	298155	25976.7	14084.2	12017.7	3261.54
H3	9	297584	26498.5	14949.1	12792.7	3764.06
H4	9	346207	32711.5	19404.6	16663.2	5322.05
H5	9	445714	43137.5	26095.4	22265	6607.1
H6	9	456029	44778.4	27332.7	23517.4	6950.04
H7	9	316457	30415.7	18183.8	15708.3	4164.52
H8	9	302470	28440.7	17004.6	14712.3	4171.71
H9	9	273569	25753.7	14694.5	12984.9	3905.73
H10	9	482710	44352.6	25319.9	21725.6	6297.68
H11	9	417504	38538.3	21388.2	18427.6	5499.74
H12	9	449118	38929.4	20177.1	17825.1	5046.78
A1	10	375539	95765.4	58744	510789	2981.12
A2	10	218708	58615.4	39299.4	326686	1466.24
A3	10	201153	52929.3	39209.1	318790	1540.94
A4	10	313226	66136.5	52858.8	383561	2814.63
A5	10	316163	74031.6	59383	422248	2469.11
A6	10	252112	56915.7	51899.7	374573	1934.59
A7	10	445390	61609.5	60087	366995	4592.08
A8	10	297307	60495.1	62838.3	451792	3496.11
A9	10	257482	55758.1	54636.9	407175	2480.25
A10	10	476878	83924.5	71324.9	495304	4958.73
A11	10	442276	91868.3	71992	567185	708.719
A12	10	452630	99141.9	67570.6	549172	4455.08
B1	10	670603	96633.7	68411.9	440140	7428.07
B2	10	264505	54293.4	44046.3	333143	2653.88
B3	10	218636	49812.1	42200.8	313576	1629.09
B4	10	257917	60706.6	51766.8	365367	9423.05
B5	10	278069	66522.2	60258.2	407814	2826.14
B6	10	260150	62362.3	57491.6	383240	2568.31
B7	10	299001	50712.6	54053.4	343482	3403.34
B8	10	287904	59352.7	61692.3	412009	2974.47
B9	10	211440	47050.4	48023.9	340591	1918.71
B10	10	341861	80671	65812.8	456648	3284.66
B11	10	350669	86224.7	69777.4	515778	2662.38
B12	10	357041	92003.4	63991.3	502986	3093.34
C1	10	475122	109669	74690.8	564123	4549.49
C2	10	256238	64355	48167.3	359614	2571.23
C3	10	231239	57549.5	47693.3	338258	1937.51
C4	10	243301	57826.6	51870.1	345984	2563
C5	10	334353	79997.7	70843.5	444993	3325.17
C6	10	270293	65272.5	62947.1	398405	2534.92
C7	10	251876	64995.5	62778.1	403058	2807.26
C8	10	269540	64110.4	65944.1	428700	2714.22
C9	10	198136	48730	50314.4	342629	1491.07
C10	10	514157	78857.4	76843.7	459314	5586.62
C11	10	369754	79760	73340.7	524035	3807.18
C12	10	341747	75044.8	60438.2	459647	3082.08
D1	10	548426	119318	86587.7	627036	5925.48
D2	10	269076	69067.9	52561.5	376773	1753.18
D3	10	284341	67720.7	59360.2	398557	2615.68
D4	10	288646	71252.6	63814.3	404993	3174.13
D5	10	386865	95452.4	86230.1	515462	4357.4
D6	10	319454	78425.8	75361	451387	3355.64
D7	10	486030	84308.6	85006.1	443992	5723.4
D8	10	352794	72555.8	81180.9	485583	3606.8
D9	10	218499	51047.6	57546.9	368794	2675.37
D10	10	354793	82245.7	78924.3	513177	3192.28
D11	10	343797	85029.5	76141.8	533911	2048.38
D12	10	357059	91886.1	73199.3	551158	3400.3
E1	10	555999	127716	89284.2	636359	5064.1
E2	10	294762	72204.1	59615.4	423569	2843.16
E3	10	299111	72307.2	64806	423505	2415
E4	10	378140	88979.6	84128.4	510722	3789.1
E5	10	416128	101338	94376.6	553558	3923.93
E6	10	345974	85096.8	82402.8	478445	3346.18
E7	10	294915	66324.7	76022.7	445508	3119.03
E8	10	370086	89292.4	95671.9	568945	3370.48
E9	10	250591	62395.1	66843.4	420058	2417.32
E10	10	636957	89418.4	93129.9	511621	7278.3
E11	10	420152	79741.9	84232.4	570619	4221.95
E12	10	423529	81472.4	78527.2	578450	4135.06
F1	10	522942	134965	89735.9	623524	4450.54
F2	10	273244	72222.3	59013.4	420127	1934.52
F3	10	292981	77263.5	67692.9	438484	2187.11
F4	10	362133	86555.2	81755.2	501783	3479.43
F5	10	465617	112488	106424	638871	3903.46
F6	10	390181	95226.2	91421.4	534066	3956.16
F7	10	304705	74969.2	85675.6	513904	3365.23
F8	10	392984	96658.6	102350	610915	4534.91
F9	10	283508	72029.5	75583.4	479010	2343.56
F10	10	563513	99270	98129.9	596823	6029.63
F11	10	464440	106412	96543.2	667365	3082.95
F12	10	412528	97067.9	80315.9	606128	3897.72
G1	10	516489	46614	27112.1	23034.5	6491.41
G2	10	263256	23397.6	12874.4	11140.4	2820.62
G3	10	295077	27288.8	15628.8	12386.7	3221.22
G4	10	361325	35314.6	21127.5	17806.4	5258.39
G5	10	373671	36432.8	21997.1	18697.7	5343.25
G6	10	413957	41668.4	25905.5	22156.5	6465.32
G7	10	307866	30947.6	19434.6	25328.8	7082.21
G8	10	283051	27995.1	17346.6	14367.5	4159.97
G9	10	256027	24543.5	14681.6	12230.5	3395.5
G10	10	370498	34017.4	19427.8	16164.9	4144.38
G11	10	359129	34075.2	19756.2	16795	4607.79
G12	10	413582	36174.9	20220.8	17406.2	4593.62
H1	10	654639	58808	32212.6	27305.8	8122.49
H2	10	298332	25835.8	13960.8	12363.6	3236.35
H3	10	296581	26839.8	14761.6	12572.6	4002.88
H4	10	346061	32824	19231.3	16839.7	5180.96
H5	10	445654	43204.6	25968.4	22222.2	6618.88
H6	10	455845	45037.2	27299.9	23238.3	6730.17
H7	10	315810	30332.9	18096.3	15570.8	4233.14
H8	10	302316	28557.8	17051.8	14836.7	4348.89
H9	10	273317	25577.1	14811.4	12726.8	4078.11
H10	10	481939	44295.8	25456.5	22028.8	6144.56
H11	10	416499	38318.3	21382.9	18629.4	5786.75
H12	10	447344	38964.1	20201.3	17694.8	5677.4
A1	11	376478	95891.8	58706.6	510736	2873.3
A2	11	218982	58679.6	39454.6	326565	1539.49
A3	11	201936	53441.4	39278.1	319375	1454.62
A4	11	320385	67250.4	52840.3	383355	2427.04
A5	11	325490	75538.7	59432	421687	2153.99
A6	11	260544	57863.5	52096.4	373635	1918.53
A7	11	446226	61780.4	60281.6	366298	4686.19
A8	11	297440	60773.7	62907	451827	3344.18
A9	11	258477	55855.2	54718.3	407109	2563.15
A10	11	477096	84170.4	71587.2	495182	4757.44
A11	11	442059	92466	72030.9	567411	496.67
A12	11	452472	99084.8	67949.6	549203	3913.4
B1	11	670100	96676.3	68439.1	439990	7013.77
B2	11	265577	54168.3	44177	333508	2594.04
B3	11	220862	49906.9	42248.6	313750	1414.3
B4	11	258904	60986.9	52093.8	365453	9699.87
B5	11	279924	66868.1	60318.2	408735	2930.63
B6	11	261581	62580.9	57598.1	383003	2495.67
B7	11	299425	50876.2	54034.7	343623	3316.93
B8	11	288145	59626.6	61789.6	411704	2896.51
B9	11	211793	47081.4	48060.9	340362	1857.1
B10	11	342498	80688	66004	456029	2924.59
B11	11	352544	86707.6	69779.5	515855	2986.71
B12	11	357437	92612.3	64041.8	503805	3026.17
C1	11	488751	111396	75080.6	564148	4601.12
C2	11	267750	65643.1	48481.2	359289	2456.24
C3	11	243687	58715.7	47860.4	338563	2060.19
C4	11	244152	58170.9	51989.6	345488	2521.98
C5	11	335177	80268.5	70364.3	444561	3306.38
C6	11	270868	65711.9	62813.8	398492	2575.87
C7	11	252525	65547.3	62990.6	403529	2433.89
C8	11	269688	64348.3	66135.7	428583	2324.94
C9	11	198681	49063.4	50399.1	342606	1379.49
C10	11	515154	79268.3	76803.3	459967	5353.62
C11	11	371312	80196.6	73210.9	524128	3828.63
C12	11	343028	75192.9	60192.6	458750	2599.89
D1	11	552714	119792	86967.3	626893	5829.35
D2	11	274210	69636.1	52862.1	376910	1781.36
D3	11	288588	68196.2	59490.5	398689	2475.29
D4	11	289699	71735	64024.3	404886	2845.47
D5	11	388124	95869.1	86280.2	514919	4194.96
D6	11	320436	78841.3	75467.5	452148	2985.25
D7	11	485907	84381.7	84986.7	444426	6021.07
D8	11	353396	72751	81268.5	485933	3733.07
D9	11	218989	51396.2	57589.6	368683	2509.26
D10	11	355151	82567.8	78941.1	513101	3321.84
D11	11	345280	85231.8	76309	534521	2072.46
D12	11	356935	92192.2	73270.3	551374	3423.04
E1	11	563676	128544	89290.9	637137	5047.7
E2	11	302954	73338.9	59924.6	423776	2643.9
E3	11	307222	73569.8	64908.7	423697	2211.39
E4	11	381081	89199.6	84203.5	511517	3478.29
E5	11	420753	102152	94450.7	553840	3510.99
E6	11	349689	85498.5	82548.8	478130	3357.9
E7	11	295292	66399.3	76123	445411	3302.5
E8	11	370928	89710.3	95644.7	568954	3718.41
E9	11	250810	62678.9	66910.9	420298	2447.61
E10	11	636756	89730.8	93136.1	511726	7101.51
E11	11	421007	80037.9	84195	570559	4246.17
E12	11	423731	81732	78662.2	579077	4303.19
F1	11	530100	136017	90157.8	623130	4564.74
F2	11	278102	72901.4	58966.2	420518	2165.07
F3	11	297812	77943.5	67947.3	438294	2578.22
F4	11	363004	86871.6	81710.6	501422	3593.56
F5	11	467331	113013	106568	638322	4183.2
F6	11	391642	95341.1	91509.7	534293	4005.4
F7	11	304982	75283.7	85636	514346	3692.28
F8	11	394886	97142.5	102511	611011	4548.06
F9	11	284351	72372.2	75584.5	478943	2507.49
F10	11	563876	99190.2	98424.5	596277	5357.06
F11	11	465040	107298	96574.4	665568	3216.77
F12	11	412433	97114.7	80237.7	605391	3646.75
G1	11	516353	46842.9	26827	22771	6246.08
G2	11	262739	23363.1	12763.4	11126.6	3126.12
G3	11	294199	27364.7	15633.8	12236.3	3389.17
G4	11	361009	35072.4	21131.4	17744.1	5286.03
G5	11	373399	36732.7	22019	18711.1	5512.11
G6	11	414122	41757.3	25952.1	22022	6312.55
G7	11	307287	30960.2	19412.5	25293.6	6917.81
G8	11	283822	27857	17284.8	14382	4185.24
G9	11	255844	24644.6	14910.9	12400.5	3252.46
G10	11	369597	34138.5	19447.4	16162.7	3751.55
G11	11	359481	33924.7	19945.9	16841.1	4496.59
G12	11	413723	36712.7	20180.4	17387.5	4672.59
H1	11	652976	58365.1	32065.8	27647.7	7913.52
H2	11	298128	25630.6	14090.1	12153.3	3128.74
H3	11	296421	26377.1	14908.2	12785.5	3981.49
H4	11	345430	32730.4	19373.7	16916.5	5326.75
H5	11	445148	43159.5	25964.4	22223.2	6754.32
H6	11	454897	44889.7	27288.4	23278.7	6836.53
H7	11	315060	30318.4	18017.5	15469.3	4181.92
H8	11	302371	28392.4	17008.3	14674	4254.27
H9	11	272811	25395.1	14760.4	12914.5	3828.64
H10	11	481911	44199	25598.1	21962.3	6602.69
H11	11	417005	38335.4	21176.5	18843.3	5693.74
H12	11	447355	38803	20372.3	17641.6	4959.98
A1	12	376853	95975.5	58624.4	510041	3087.49
A2	12	219741	58882.5	39441.5	326241	1587.27
A3	12	202840	53402	39438.5	318991	1278.06
A4	12	333516	68907.1	52934.9	383415	2721.85
A5	12	343103	77584.4	59467.1	421738	2328.97
A6	12	275152	59645	51980.1	373948	1830.23
A7	12	446535	61914.1	60220.5	366766	4837.41
A8	12	298159	60993.8	62878.1	452143	3162.36
A9	12	258860	55879	54687.6	407472	2419.52
A10	12	477326	84249.3	71399.7	495516	5058.37
A11	12	443843	92458.8	72214.9	567561	282.354
A12	12	453413	98886.9	67550.7	547129	3949.33
B1	12	670868	96713.1	68410.5	439938	7226.91
B2	12	267828	54850.8	44276.7	333590	2851.12
B3	12	223709	50416.3	42200.8	313597	1746.78
B4	12	261105	60947	52012.7	365356	9348.89
B5	12	281637	67188.4	60544.5	408219	3228.92
B6	12	263522	63039	57647.7	383192	2441.59
B7	12	299847	50938	54258.3	343981	3338.34
B8	12	288578	59786.7	61682.1	412171	2947.42
B9	12	211674	47180.7	48131.7	341014	1824.25
B10	12	343109	80839.6	66000.4	456613	3492.09
B11	12	352818	86921.3	69813.2	515706	3170.43
B12	12	358259	92811.7	64011.5	503883	3089.99
C1	12	511594	114600	75006.3	564545	4426.56
C2	12	290153	68490.8	48337.4	359573	2600.23
C3	12	265172	61369.3	47770.3	338242	2002.13
C4	12	244989	58294.5	51989.6	345767	2474.12
C5	12	336349	80611.9	70605.7	444316	3399.46
C6	12	271955	65953.4	62844.3	398484	2644.92
C7	12	253355	66051.9	62905.5	403307	2625.91
C8	12	270071	64581.6	66189.5	428715	2608.65
C9	12	199020	49068.1	50464.2	343111	1373.7
C10	12	514829	79408.1	76919.4	459795	5349.28
C11	12	372085	80164.5	73450.4	524417	3878.67
C12	12	343041	75151.2	60297.7	459272	2828.35
D1	12	559191	120986	87052	627084	5678.99
D2	12	281868	70792.2	52714.8	376582	1864.9
D3	12	295412	69251.2	59464.4	398852	2784.57
D4	12	290558	71962.2	63943	405127	3045.83
D5	12	389206	96385.1	86433.5	515212	4294.84
D6	12	321496	78993.9	75632	451797	2915.2
D7	12	486155	84614.1	84963.3	444241	5898.27
D8	12	354204	72961.6	81422.8	486254	3635.23
D9	12	219763	51668.1	57438.7	368784	2446.03
D10	12	356333	82847.6	79041.1	513566	3265.43
D11	12	345959	85660.7	76342.8	534337	2170.69
D12	12	358183	92390.8	73297.6	551264	3187.78
E1	12	577342	130959	89503.7	637500	5270.5
E2	12	315980	75510.3	60201.4	424258	2757.76
E3	12	319921	75121.5	64837	423644	2337.7
E4	12	386709	90358	84298.5	510783	3248.28
E5	12	427624	103339	94495.7	553986	3510.99
E6	12	355936	86463.2	82831	478804	2991.64
E7	12	295711	66646.8	76010.9	445576	3305.43
E8	12	371613	90118.3	95803.1	569444	3695.02
E9	12	251178	62850.9	66877.1	420691	2246.55
E10	12	636889	89547.6	93277.2	512482	7250.48
E11	12	421667	80390.3	84233.3	570320	4425.6
E12	12	424708	82041.1	78629.9	578929	4262.58
F1	12	540268	137606	89956.7	623201	4354.15
F2	12	287645	75761	59197.3	420526	1940.37
F3	12	308042	79569.8	67986.6	438622	2412.39
F4	12	364312	87161.4	81914.3	501679	3650.11
F5	12	468478	113241	106674	639196	3932.4
F6	12	392408	95758.1	91586.6	534716	3854.16
F7	12	305506	75448.2	85762.5	513839	3124.24
F8	12	394992	97396.7	102417	611130	4466.09
F9	12	284773	72531.3	75890.7	479188	2848.29
F10	12	563828	99562.5	98416	596797	5538.26
F11	12	465509	107230	96636.7	666218	2522.13
F12	12	413316	97433.9	80379	606993	3815.21
G1	12	515053	46670	26856.4	22913.6	6520.01
G2	12	262690	23331.2	12799.5	10937.8	2911.41
G3	12	294063	27019.6	15376.7	11981.3	3193.44
G4	12	360076	35039.1	20970.9	17774.8	4866.5
G5	12	372956	36591.7	22133.4	18637.6	5132.17
G6	12	413157	41697.7	26002.3	22290.1	6752.34
G7	12	307231	31078	19550	25456	6822.53
G8	12	283205	27938.3	17240.4	14363.6	4093.89
G9	12	255391	24365.4	14833.1	12434.7	3311.3
G10	12	369897	34256.4	19299.7	16039.2	3867.21
G11	12	359181	33904.3	19832.1	16672.4	4629.55
G12	12	413341	36362.3	20069.5	17237.6	5114.31
H1	12	653284	58128.5	32115.3	27671.9	7577.14
H2	12	297545	25665.2	13955	12076.1	3298.17
H3	12	295969	26473.2	14749.6	12482.3	3873.37
H4	12	344590	32812.6	19364.3	16911.8	5007.88
H5	12	445761	43001.3	25742.5	22288.8	6712.12
H6	12	454708	44811.1	27174.8	23308.3	6580.91
H7	12	314378	30363.7	17939.6	15372.8	4236.04
H8	12	302134	28498.4	17066.7	14664.6	4060.39
H9	12	272871	25626.6	14459.6	12945.5	4029.93
H10	12	480840	44436.5	25321.2	21809.4	6581.7
H11	12	416272	38332.6	21112.2	18586.6	5427.98
H12	12	447820	39261.8	19998.7	17551.7	5030.83
A1	13	378082	96467.9	58607.9	509350	3654.28
A2	13	220356	59131.3	39471	326553	1554.36
A3	13	203238	53840.5	39237.5	319265	1182.92
A4	13	357780	71751.4	52984.4	383392	2414.03
A5	13	374797	81055.2	59511.2	422520	2208.26
A6	13	302200	62455	51907.6	373756	1746.75
A7	13	446323	62156.1	60390.1	366702	4723.99
A8	13	298550	61114.1	63045.4	451591	3360.78
A9	13	259026	56008.5	54842.6	407256	2606.53
A10	13	477980	84423.4	71535.3	495279	4932.56
A11	13	443531	92726	72165.8	567105	505.742
A12	13	452714	99293.4	67858.7	546030	3693.69
B1	13	671390	96979	68538.3	440831	7095.03
B2	13	271458	55290.2	44221.7	333211	2540.85
B3	13	229142	51070	42292.3	313529	1632.03
B4	13	264061	61689.5	52105.9	365299	9339.4
B5	13	284465	67459.1	60595.1	407939	2692.17
B6	13	266951	63375.8	57825.5	383050	2631.27
B7	13	299710	50936.5	54220.9	343417	3444.63
B8	13	288720	59878.5	61828.9	412815	2720.7
B9	13	212058	47365.5	48191.7	340342	1889.96
B10	13	342978	81079.2	66074.6	456432	3398.7
B11	13	353566	87119.5	69937.9	515545	2861.49
B12	13	358772	92939.2	64120.2	503624	3128.05
C1	13	552899	120302	74833.3	564218	4663.81
C2	13	327935	72876.3	48405.6	359908	2311.2
C3	13	302546	65600.4	47925.1	338657	2002.13
C4	13	245553	58600.2	52114	345754	2557.14
C5	13	336413	80691.4	70621.8	443913	3375.3
C6	13	272418	66101.7	62870.8	397991	2464.26
C7	13	253874	66410.1	63215.8	404104	2799.88
C8	13	271119	64609.9	66421	429159	2512.98
C9	13	199606	49200.7	50561.9	343072	1458.01
C10	13	515307	79688.6	76910.8	460434	5477.08
C11	13	372145	80616.2	73309.5	524427	3841.9
C12	13	342964	75439.5	60378.5	459163	2883.27
D1	13	570724	122809	86839.5	627093	5951.36
D2	13	296824	72577.2	52870.2	376561	1790.42
D3	13	307508	70877.6	59597.8	398857	2408.14
D4	13	291158	72341.9	64295.3	404669	2841.52
D5	13	390807	96862.5	86560.2	515112	4334.19
D6	13	322810	79585.3	75788.9	452486	3275.04
D7	13	486708	84707.6	84953.6	444318	5847.19
D8	13	355052	73438.6	81445.3	486181	3554.95
D9	13	219616	51739	57543.5	368966	2620.56
D10	13	356290	82860.8	79178.3	513168	3234.58
D11	13	346500	85745.1	76383.4	534487	1845.18
D12	13	358392	92807.5	73332.1	550802	3208.54
E1	13	601609	133490	89701.9	637452	5493.29
E2	13	340679	77934.1	59987.1	424484	2639.34
E3	13	344169	77804.9	65039.3	423751	2362.74
E4	13	395571	90998	84654.1	510951	3616.3
E5	13	440064	104554	94641.9	554353	3629.99
E6	13	366922	87890.4	82815.4	478338	3411.62
E7	13	296406	66843.3	76281.3	445523	3044.86
E8	13	373073	90201.7	95996.7	569034	3441.69
E9	13	251507	62990.1	67053.1	419952	2202.49
E10	13	637220	89752	93125.5	512044	7178.69
E11	13	422055	80316.1	84329.8	570261	4347.55
E12	13	424016	82057	78834.6	578418	4518.44
F1	13	559093	140445	90230.3	623331	4604.78
F2	13	303035	77483.6	59362.3	420854	2051.55
F3	13	326137	81730.9	67873.8	438351	2201.71
F4	13	365424	87435.4	82031.9	501524	3747.79
F5	13	471215	113747	106981	639101	3711.61
F6	13	393786	95921	91750.1	534684	3585.96
F7	13	305910	75489.3	85877.6	514107	3297.33
F8	13	396048	97197.2	102801	611443	4323.39
F9	13	284737	72918.5	75745.1	479098	2671.42
F10	13	563991	99687	98310.7	597372	5498.82
F11	13	466085	107503	96778.9	666764	2962.41
F12	13	413633	97620.2	80363.9	606403	3773.1
G1	13	514681	46979.6	26848.7	22922.9	6872.2
G2	13	262135	23635.1	12858.2	10809.3	2948.22
G3	13	294067	27190.3	15478.8	12009.4	3166.93
G4	13	359867	34886.7	21108.8	17881.5	5179.42
G5	13	372754	36335	22031.4	18727.3	5356.68
G6	13	413464	41650.6	25922.9	22060.7	6605.13
G7	13	307038	31009.6	19376.5	25324.2	7010.29
G8	13	283200	28051.8	17142	14420.6	4279.49
G9	13	255214	24504	14864.4	12442.8	3406.66
G10	13	369352	34343.7	19481	16093.8	4226.22
G11	13	359227	33785.7	19990	16730.7	4598.12
G12	13	412920	36578.2	20033	17137.7	5341.34
H1	13	651035	58535	32236.5	27526.8	8017.16
H2	13	296791	25714.6	14077.3	12024.7	3180.25
H3	13	296111	26295	14939.5	12448.6	3944.66
H4	13	344288	32593.3	19277.2	16615.8	5026.69
H5	13	445136	43058.4	25992.4	22557.1	6542.33
H6	13	454030	44685.6	27191.7	23311	7013.5
H7	13	314424	30455.2	17912.7	15535.7	4280.5
H8	13	302266	28635	16959.2	14645	4160.58
H9	13	271972	25577.1	14539.3	13098	3834
H10	13	480673	44180.9	25301.3	21842.7	6312.5
H11	13	417005	38179.7	21242.2	18612	5689.75
H12	13	445802	38872.3	20279.4	17766.4	4919.23
A1	14	379395	96791.2	58868.2	508854	3126.83
A2	14	221331	59356	39466.7	326745	1424.83
A3	14	203994	53904.8	39310.6	318679	1646.87
A4	14	399552	76056.9	52947.3	383111	2779.95
A5	14	430058	86776.1	59516.9	421982	2323.3
A6	14	349841	67277.1	51855.1	373420	1887.23
A7	14	446032	62073.9	60360.4	366738	4865.56
A8	14	299112	61506.4	62910.4	452173	3181.45
A9	14	259239	56320.7	54775.7	407494	2617.13
A10	14	478342	84621.7	71615.1	495637	4881.23
A11	14	444433	93224.7	72253.8	567585	471.723
A12	14	452922	99308.8	67877.2	545220	4181.48
B1	14	671941	97220	68655.1	440562	7272.21
B2	14	279624	56333.8	44280.2	332688	2739.2
B3	14	239284	52357.2	42359.4	313883	1791.9
B4	14	269728	62394.5	51987.7	365474	9651.58
B5	14	290638	68296.1	60516.6	407624	2730.09
B6	14	272411	64072.6	57775	382880	2504.55
B7	14	299853	51137.2	54226.2	343680	3488.97
B8	14	289217	60222.2	61899.5	412562	2990.38
B9	14	212961	47344.3	48101.2	340625	1920.35
B10	14	344052	81282.8	66030.8	456120	3066.47
B11	14	354533	87010	69916.4	515526	3217.64
B12	14	359048	93177.5	64127	503542	3010.5
C1	14	619062	129327	75143.9	564540	4510.15
C2	14	388124	79735.6	48383.6	359782	2373.36
C3	14	362704	71690.2	47833.2	338741	2017.11
C4	14	245990	58703.9	52274.4	345546	2720.26
C5	14	337969	81044.3	70787.2	444557	3425.42
C6	14	273060	66261.6	62963.9	398298	2526.09
C7	14	254554	66756.9	63311.3	403512	2483.95
C8	14	272045	64773.8	66495.2	429580	2454.42
C9	14	199758	49457.9	50522.8	342494	1427.43
C10	14	516271	79588.6	77078.6	460065	5554.45
C11	14	373021	80957.4	73608.5	524386	3883.78
C12	14	343113	75522.8	60274.5	459171	2873.39
D1	14	591526	125468	87289.6	627517	5791.14
D2	14	323335	75645.9	52881.4	376711	1785.39
D3	14	330389	73091.2	59677	398686	2434.59
D4	14	292602	72746.2	64110.5	404864	3161.3
D5	14	392204	97117.3	86593.6	515508	4319.06
D6	14	324699	79467.7	75751.8	452463	2920
D7	14	486734	84591.9	85137.2	444308	5807.89
D8	14	355610	73277.4	81486.2	486592	3554.11
D9	14	220251	52086.7	57711.1	369000	2585.99
D10	14	357775	83039.9	79138.5	513078	3205.5
D11	14	347302	85814.8	76539.9	534616	2286.25
D12	14	358985	92671.1	73454.7	551336	3303.43
E1	14	642849	139134	89579.5	636877	5389.41
E2	14	381513	82898.9	60084.2	424733	2618.85
E3	14	384943	82156	64892.6	424249	2590.3
E4	14	413518	92811.2	84628.7	511786	3509.71
E5	14	463199	107086	94525.8	554110	3846.63
E6	14	387842	90044.5	82845.6	478912	2982.84
E7	14	296832	66938.7	76305.8	445470	3503.54
E8	14	374067	90613.7	95942.2	569307	3598.37
E9	14	252012	63277.7	66837.9	419750	2235.54
E10	14	637354	89706	93129	511861	7342.02
E11	14	422686	80450.5	84458.3	569488	4307.18
E12	14	425325	81969.5	78668.9	579186	4288.57
F1	14	591094	144626	90048.9	623345	4944.39
F2	14	329243	79604.6	59189	420868	2081.98
F3	14	359319	85219.4	68021.8	438509	2363.37
F4	14	367824	87633.6	81940.7	502412	3542.15
F5	14	475088	114233	106984	639290	4411.49
F6	14	397713	96486.6	91805.2	534292	3832.17
F7	14	306142	75436.3	85851.2	513138	3282.98
F8	14	397076	97493.5	102731	611567	4579.44
F9	14	285821	72900.5	75749.4	479050	2137.57
F10	14	565123	99747.6	98557.4	597160	5320.82
F11	14	467842	107499	96866.1	666959	3128.92
F12	14	414130	97515.1	80355.9	607249	3749.03
G1	14	514939	46861.1	26785.2	23321.3	6533.55
G2	14	263151	23254.5	12903.1	11272.6	3129.8
G3	14	293758	27001.9	15462.4	11793.9	3255.32
G4	14	359149	34646.4	20899.9	17877.6	5029.38
G5	14	373373	36282.4	22039.1	18862.7	5132.17
G6	14	413067	41554.6	25885.4	22219.1	6400.51
G7	14	306775	30927.8	19422.6	25125.6	6735.67
G8	14	283338	27653.6	17242.4	14193.8	4252.29
G9	14	255206	24582.9	14837.2	12354.2	3455.35
G10	14	368944	34019.6	19500.6	16056.6	3896.68
G11	14	359329	33812.5	20037.7	16904.2	4741.97
G12	14	413561	36578.2	19952.1	17526.1	4756.49
H1	14	651031	58458.7	31859.2	27684	7779.31
H2	14	296818	25593.5	14028.4	12170.8	3571.78
H3	14	295030	26455.5	14943.1	12813.2	3650
H4	14	344032	32601.8	19295	16859.6	5289.13
H5	14	445067	42986.2	25826.5	22524.3	6761.19
H6	14	454184	44678.5	27133.1	23438.5	6476.34
H7	14	313838	30304	18055	15580.5	4539.51
H8	14	302397	28499.3	17008.3	14694.6	4434.24
H9	14	272237	25386.5	14507.4	12902.8	3902.52
H10	14	480439	44320.3	25482.6	21842.7	6469.33
H11	14	416134	38564	21192.6	18697.6	6097.68
H12	14	446584	39239.4	20281.2	17579.2	4864.32
A1	15	380769	96707.5	58642.3	507991	3266.71
A2	15	222570	59243.7	39650.3	326554	1799.62
A3	15	205279	54292.4	39391.8	319094	1241.77
A4	15	465264	83368.4	52802.2	383164	2376.74
A5	15	516757	95555.1	59526.7	422488	2566.32
A6	15	424375	74978.4	51880.6	373642	1859.93
A7	15	447009	62338.1	60467.3	366277	4761
A8	15	299776	61553.4	63013.9	451981	2958.95
A9	15	259691	56622.5	55042.6	407791	2581.46
A10	15	478268	84774.5	71479.5	495615	5047.3
A11	15	444829	93212.8	72229.8	567465	760.88
A12	15	454179	99475.7	67579.1	545451	3870.56
B1	15	671295	97224.4	68736.6	440344	7000.45
B2	15	292074	57943	44310	333418	2643.9
B3	15	257189	54215.3	42361.5	314032	1970.4
B4	15	280177	63408	52087.8	365440	9605.01
B5	15	301073	69171.9	60466.8	408098	2681.21
B6	15	283762	65206.6	57884.7	382819	2581.23
B7	15	300074	51113.9	54301.7	343831	3437.74
B8	15	289555	60454.3	62037.6	412588	2856.73
B9	15	213144	47623.6	48199.9	341083	1826.71
B10	15	344162	81452.3	66058.5	456182	3022.47
B11	15	355131	87358.3	70069.8	515774	2974.39
B12	15	359971	93217.6	64130.3	503859	2847.04
C1	15	715302	141924	75089.1	564293	4583.91
C2	15	473901	89226.8	48373.1	360111	2348.5
C3	15	447338	80211.2	47865.1	338902	1627.55
C4	15	246704	58683.2	52035.3	345633	2431.14
C5	15	339287	81152.5	70886.5	443821	3241.93
C6	15	273826	66529.4	62904.5	398149	2347.03
C7	15	255252	67150	63350.3	404058	2734.23
C8	15	272456	64951.9	66294.7	429017	2494.84
C9	15	200019	49721.4	50551.3	342855	1322.46
C10	15	515640	79933.4	77181.9	460605	5354.49
C11	15	373255	81063.8	73489.7	524404	3639.7
C12	15	343956	75835.4	60513.5	459571	2683.37
D1	15	627232	130440	87198.9	627607	5612.44
D2	15	367948	80657.1	52883.4	376668	1837.72
D3	15	368404	77084.5	59541.6	399498	2669.61
D4	15	294253	73178.7	64092.1	404434	3168.21
D5	15	394384	97519.3	86743	515552	4372.53
D6	15	326901	80339.2	75771.8	452230	2905.6
D7	15	486377	84947.4	85246	444645	6073.13
D8	15	355964	73841.2	81607.2	486922	3661.99
D9	15	220632	52047.2	57824.3	368870	2634.9
D10	15	357564	83331.2	79322.6	512893	3488.42
D11	15	347727	85878.6	76796	534890	2197.65
D12	15	359222	93033	73471.9	550440	3340.99
E1	15	708549	147579	89563.5	637218	5485.09
E2	15	445229	89986	60096.4	424777	2618.85
E3	15	447673	89032.3	64838.1	424446	2650.19
E4	15	443383	96275.7	84318.4	510662	3430.05
E5	15	503697	111105	94764	554286	3741.87
E6	15	424262	93482.1	82883.6	478919	3459.48
E7	15	296975	67028.5	76223.3	445570	2954.1
E8	15	373887	90838.4	96161.1	569800	3824.22
E9	15	252110	63268.6	66920	419748	2249.31
E10	15	637364	89835.2	93291.4	512229	7325.87
E11	15	422414	80944.8	84389.9	570647	4050.6
E12	15	424861	81949.2	78920.8	578110	4258.52
F1	15	648110	151940	90061	623645	4778.29
F2	15	377006	86668.7	59327	420861	2107.73
F3	15	414232	91158.4	67932.4	438415	2529.2
F4	15	372076	88203.3	81984.3	501714	3726.2
F5	15	481079	114994	107018	639327	4092.09
F6	15	402557	96985.5	92007.2	534846	3663.34
F7	15	306510	75687.7	85944.6	513218	3638.73
F8	15	397602	97897.2	102778	611849	4606.76
F9	15	285795	73268.6	75766.5	478748	2705.93
F10	15	564650	99551.9	98448.9	596818	5827.11
F11	15	468155	107660	96836	666937	3060.47
F12	15	414103	97598.2	80665.1	607493	3712.93
G1	15	514501	46704.6	26825.4	22881	6389.06
G2	15	262598	23396.3	12903.1	11077.5	2988.7
G3	15	292655	27007	15516.6	12083.3	3082.32
G4	15	359109	34917	20938.3	17814.3	5164.61
G5	15	372740	36481.7	21913.2	18858.9	5486.21
G6	15	413230	41683.5	25856.2	22131.6	6715.31
G7	15	306017	30978.2	19413.4	25232.3	6601.16
G8	15	283384	27812.5	17196	14381	4044.34
G9	15	254657	24620.4	14809.9	12176.1	3084.05
G10	15	369117	33934.4	19362.7	15798.6	4122.55
G11	15	359155	34012.7	19876.1	16960.1	4444.61
G12	15	413501	36626.9	19988.6	17301.3	4971.18
H1	15	650254	58554.1	31937.7	27316.1	7813.29
H2	15	296747	25712.2	14120.3	11865.8	2832.24
H3	15	295286	26236.8	14789.2	13131.9	3693.96
H4	15	343215	32541.3	19087	16453.5	5137.69
H5	15	444546	43041.3	25957.4	22238.1	6424.55
H6	15	453356	44574.3	27142.9	23134.1	6574.65
H7	15	313421	30335.7	17927.1	15468.4	4161.62
H8	15	302253	28565.3	17008.3	14458.9	4538.14
H9	15	271438	25397.3	14514.8	13240.9	4058.83
H10	15	479892	44322.9	25459	21885.9	6431.05
H11	15	416210	38162.6	21204.6	18571.9	5754.86
H12	15	446133	38764.2	20067.4	17560.9	5248.72
A1	16	381917	97885.9	58726.1	507438	3027.75
A2	16	224090	59602.5	39589.1	326298	1845.27
A3	16	206854	54484.2	39442.5	318972	1599.79
A4	16	555467	92767.4	52911	383174	2407.09
A5	16	634532	107201	59343	422183	2394.58
A6	16	525425	85017.4	51910	373796	1906.49
A7	16	446582	62328.6	60526	367107	5113.3
A8	16	299939	61695.2	63230.9	451877	3046.12
A9	16	259782	56623.5	54909.6	407620	2408.92
A10	16	478354	84678.3	71487.5	495774	4941.62
A11	16	445584	93599.3	72180.7	567248	730.264
A12	16	453697	99189.8	67836	544146	3996.31
B1	16	672556	97469.8	68720.3	440439	7172.3
B2	16	313979	60899.6	44267.5	333402	2731.44
B3	16	287975	57537.2	42393	314450	1475.11
B4	16	299323	65332	52102.5	365595	9636.92
B5	16	320660	71302.3	60507.3	408167	2598.64
B6	16	303718	67303.2	57869.5	382573	2431.1
B7	16	300285	51109.6	54296.5	343799	3248.12
B8	16	289743	60441.4	62040.8	412801	3026.97
B9	16	213281	47906.9	48234.4	340447	1840.68
B10	16	344481	81412	65956.6	455690	3293.64
B11	16	355435	87478.2	70158.7	516224	2892.28
B12	16	359771	93356.9	64076.5	503530	3054.16
C1	16	833914	158139	75011.2	563961	4891.23
C2	16	574490	99829.7	48355.2	360105	2357.82
C3	16	546594	90173.8	47806.9	339510	2002.13
C4	16	248343	59335.1	52234.6	345211	2843.33
C5	16	341068	81546	70739.8	443857	3071.87
C6	16	275935	66825.2	63143.7	398476	2103.73
C7	16	255708	67216.8	63429.1	403976	2792.49
C8	16	272990	65330.9	66496.8	430221	2741.43
C9	16	200343	49555.5	50506.5	343210	1844.83
C10	16	516473	79789.4	77203.4	460792	5440.56
C11	16	374126	81090.9	73553.1	525024	3801.06
C12	16	344038	75640.9	60433.8	459251	2496.64
D1	16	683755	137643	87085.5	626803	5606.28
D2	16	438019	88399.4	52811.3	376788	1721.98
D3	16	428404	83445.7	59714.1	399158	2495.63
D4	16	297776	73512.1	64164.7	404959	2791.19
D5	16	399122	98105.3	86514.1	515620	4132.41
D6	16	330797	80607.5	75798.4	452135	3138.78
D7	16	487216	84999.2	85439.4	444537	5707.69
D8	16	356285	73699.4	81732.3	486762	3988.13
D9	16	220830	52252.4	57871.2	369082	2778.24
D10	16	358193	83269.4	79258.8	513603	3287.47
D11	16	347868	86331.2	76840.4	535611	2170.69
D12	16	359569	93202.6	73529.7	550578	3246.1
E1	16	802335	159234	89522.3	637718	5470.05
E2	16	535424	99751.5	59959.2	424884	2686.03
E3	16	536887	97616.3	65038.2	424513	2530.42
E4	16	497433	101331	84533.8	511643	3654.45
E5	16	574196	117539	94710.9	554339	3729.67
E6	16	487507	99287.6	82651.9	478521	3599.14
E7	16	297524	67289.2	76271.4	445271	3164.9
E8	16	374935	91007.1	96210.5	568621	3491.55
E9	16	252619	63221.2	67109.6	419789	2363.15
E10	16	637188	89683	93216	512764	7215.48
E11	16	423251	80947.6	84474.7	570798	4525.18
E12	16	424356	82057	78882.7	577609	4165.12
F1	16	736586	163364	90029.2	623776	4856.89
F2	16	449073	93104.7	59224.4	420510	1915.8
F3	16	501909	100059	67870.6	438950	2256.99
F4	16	380751	89103.2	82168.7	501749	3554.49
F5	16	492825	116493	107098	639669	3827.36
F6	16	412144	97666.7	91776.4	534946	3817.22
F7	16	307019	75634.7	85905	513530	2967.41
F8	16	398191	98100.6	102906	611516	4519.73
F9	16	286508	73336.5	75913.2	478725	2446.02
F10	16	564681	99372.1	98444.7	596835	6096.78
F11	16	468263	107783	96979.3	667146	3155.48
F12	16	414293	97767.3	80408.3	605624	3746.45
G1	16	513653	46951.6	26715.4	23087.2	6513.99
G2	16	262285	23338.8	12926.8	11121.6	3272.12
G3	16	292706	27020.9	15439.7	12013.2	3348.76
G4	16	358980	34935.6	20868.4	17789.6	5130.06
G5	16	372743	36529.6	22025.7	18578.5	5476.61
G6	16	412863	41658.6	25855.3	22223.7	6625.5
G7	16	305982	30734.3	19200.3	25063.4	6946.77
G8	16	283523	27820.1	17183.5	14345.3	3919.95
G9	16	254926	24685.1	14785.7	12508.2	3552.74
G10	16	369562	33932.3	19373.5	15851.1	4027.62
G11	16	359624	33762.8	19846.8	16736.8	4351.54
G12	16	412547	36319.4	19989.9	17632.2	4763.9
H1	16	649419	58281.2	31898.5	27100.2	7964.49
H2	16	296588	25681.3	14166.9	12320.3	3303.89
H3	16	295228	26158.4	14663	12668.8	3851.98
H4	16	343309	32555.5	19174.2	16680.3	5065.26
H5	16	444379	42869.1	25733.5	22473.6	6899.57
H6	16	453525	44744.8	26948.6	23204.2	6822.23
H7	16	313077	30071.7	17754	15614.6	4238.94
H8	16	302305	28585.7	16962.9	14693.6	4265.4
H9	16	270896	25599.7	14557.3	12952.9	3945.35
H10	16	479242	44303.6	25409.3	21723.2	6442.16
H11	16	416391	38292.6	21490.1	18614.7	5317.7
H12	16	446086	38964.1	20132.5	17533.3	5374.49
A1	17	384964	98050.1	58678.2	507011	2828.13
A2	17	226936	60109.2	39542.1	326275	1491.72
A3	17	210193	55008.7	39471	319133	1318.28
A4	17	656505	103366	52754.5	383310	2489.47
A5	17	766229	120142	59221.3	422231	2398.63
A6	17	633612	95819.3	51931.5	373112	1887.23
A7	17	446461	62381.6	60376.5	366972	4899.34
A8	17	299456	61844.4	63162.2	451897	3166.51
A9	17	260203	56732	54973.7	407480	2501.46
A10	17	477742	84869.6	71479.5	495406	4974.83
A11	17	446264	93620.7	72501.9	567954	312.97
A12	17	453287	99712.2	67801.9	543353	3790.41
B1	17	671936	97515.3	68777.4	440801	7128.33
B2	17	349182	64695.4	44355.8	333251	2841.14
B3	17	336433	62626.5	42657.3	314310	1541.8
B4	17	332931	68987.4	52093.8	365629	9661.93
B5	17	355416	74640.3	60566.4	407946	2767.16
B6	17	340064	70624.2	57763	382752	2611.09
B7	17	300266	51106.7	54295	344215	3279.47
B8	17	290207	60693.3	62109	413167	3109.71
B9	17	212905	47961.4	48213	340747	1826.71
B10	17	344782	81391.3	66102.3	455521	3190.38
B11	17	355959	87638.8	70026.8	516502	3167.35
B12	17	360401	93650.7	64224.5	503583	2830.25
C1	17	965463	175119	74851.6	564210	4425.34
C2	17	675867	111625	48242.9	360031	2565.01
C3	17	644217	100563	47653.9	339272	2105.14
C4	17	251082	59108.7	52205.4	345224	2527.84
C5	17	344594	82110.8	70921.3	444057	3482.71
C6	17	279041	67252.9	63079.5	398408	2406.45
C7	17	256266	67624.3	63548.4	404411	2782.64
C8	17	273499	65481.4	66414.5	429590	2495.66
C9	17	201045	49926.2	50849.3	342855	1099.29
C10	17	516444	79622.5	77225.7	460962	5665.73
C11	17	374963	81254.5	73734.3	524608	3665.23
C12	17	344311	75914.1	60573.2	458958	2707.53
D1	17	765820	148384	87299.1	627165	5994.49
D2	17	532898	98632.9	52844.8	376539	1894.08
D3	17	513283	92121.3	59619.8	399358	2730.65
D4	17	303560	74076.3	64106.6	404682	3194.86
D5	17	406595	99119.8	86723.3	515097	4377.57
D6	17	337966	81531	75867.8	452508	3215.55
D7	17	486781	84999.2	85344.2	444807	5798.07
D8	17	357113	73735.1	81774.9	487667	3785.76
D9	17	220804	52313.4	57732.1	368828	2310.28
D10	17	358161	83480.3	79242.9	513279	3325.36
D11	17	348823	86573.6	76760.2	535542	1767.17
D12	17	360041	93081.3	73454.7	550571	3152.2
E1	17	915925	173811	89413.2	637723	5457.75
E2	17	637732	110921	59962.5	424492	2605.19
E3	17	640301	108742	64768.5	424304	2355.12
E4	17	580876	109632	84320.6	511031	3430.05
E5	17	683136	128159	94833.1	554449	3836.46
E6	17	585146	108308	82637.3	478859	3319.81
E7	17	297275	67105.9	76291.1	445055	3495.73
E8	17	375720	91362.2	96281.1	568906	3906.62
E9	17	253160	63298.6	66963.7	419853	2487.09
E10	17	637200	89799.8	93358.8	512444	7259.46
E11	17	423736	80882.7	84669.6	570946	4323.33
E12	17	424708	82025.2	78874.4	578404	3932.82
F1	17	856834	179102	90056.5	623264	4514.31
F2	17	546050	103768	59156	420858	1969.63
F3	17	616911	111882	68046.2	438283	2407.17
F4	17	395756	90761.2	82087.6	501903	3567.85
F5	17	514366	118269	107041	639889	3965.62
F6	17	429569	99343.2	91975.7	534699	3549.9
F7	17	306941	75680.4	85986.2	512817	3018.09
F8	17	398575	97994	102917	611796	4685.7
F9	17	286700	73253.8	75832.9	478748	2483.76
F10	17	565052	99598.7	98737.1	597282	5583.03
F11	17	469139	107838	96857.8	667515	3387.36
F12	17	413974	98045.3	80442.1	606845	4001.72
G1	17	513991	46744.1	26667.4	22870.2	7189.77
G2	17	262418	23154.9	12901.8	11161.9	3393.58
G3	17	292786	26890.7	15217.9	11987.7	3139.15
G4	17	359006	34839.8	21025	17650.2	4877.36
G5	17	372335	36600.1	21990.4	18689.1	5397.94
G6	17	412794	41691.5	25775.9	22039.5	6411.62
G7	17	305569	30926	19368.2	25231.4	6837.48
G8	17	283263	27991.3	17226.9	14295.1	4273.66
G9	17	254291	24525.3	14815	12352.2	3528.4
G10	17	368884	33672.6	19451.7	16074.1	3678.44
G11	17	359838	33825.3	19939.8	16748.9	4612.63
G12	17	413105	36112	20151.7	17292.6	4761.43
H1	17	649207	58294.5	31939.4	27468.1	7945.8
H2	17	296371	25399.4	13970.2	12009.5	3287.87
H3	17	294705	26408.7	14765.2	12493.2	3957.73
H4	17	343914	32568.7	19205.1	16849.2	4926.05
H5	17	443708	43311.8	25806.5	22143.7	6861.3
H6	17	453130	44542.5	27081.7	23118	6714.98
H7	17	313803	30187.4	17926.1	15512.3	4488.29
H8	17	302337	28281.8	16976.8	14829.3	4428.67
H9	17	270846	25058.1	14621.1	12925.2	4044.92
H10	17	479458	44218.4	25244.2	22265.5	6144.56
H11	17	415640	38632.5	21293.1	18562.6	6015.3
H12	17	445487	38919.2	19807.2	17351.7	5362.09
A1	18	392002	99003.7	58785.9	506431	3217.17
A2	18	232890	60904.8	39647.1	326141	1480.04
A3	18	216093	55743.7	39287.3	318729	1794.98
A4	18	754892	113472	52753.6	382935	2349.86
A5	18	880426	131401	59195.2	422370	2414.02
A6	18	733346	104986	51761.1	373183	1957.07
A7	18	447208	62228.1	60463.3	367235	4817.3
A8	18	300184	61825.4	63230.9	452301	3382.37
A9	18	260620	56845.3	54964.1	407752	2572.79
A10	18	478688	84766.4	71623	495374	5021.13
A11	18	446352	93724.5	72277.8	567314	671.298
A12	18	453438	99026	67589	542649	4153.84
B1	18	672561	97912	68872.5	440307	7105.69
B2	18	398574	70522.1	44365	333297	2588.5
B3	18	401181	69306.5	42389.9	314247	1688.92
B4	18	388586	74217.6	52133.5	365657	9380.8
B5	18	412985	79836.4	60498	408072	2803.39
B6	18	399921	76205.5	57799.1	382627	2368.95
B7	18	300396	51212.8	54288.3	344136	3378.87
B8	18	290895	60729.7	62096.5	412794	2925.94
B9	18	213198	47935.4	48361	340700	1855.46
B10	18	345556	81755.6	65937	455358	3159.85
B11	18	356547	87805.7	70012.5	515493	3170.43
B12	18	360703	93563.4	64285	503197	2889.58
C1	18	1.09007e+06	191354	74973.4	564978	4545.8
C2	18	768949	121975	47924.8	360508	2346.43
C3	18	734239	109175	47672.7	339435	1979.65
C4	18	254706	59552.1	52261.8	344579	2731.98
C5	18	350439	82428.3	70913.3	443759	3349.34
C6	18	284538	67713.3	63124.5	398471	2562.22
C7	18	256935	67778.4	63348.7	404562	2744.9
C8	18	273499	65605.1	66677	429622	2390.09
C9	18	201401	49951.6	50752.4	343412	1305.93
C10	18	516260	79856.3	77201.6	460838	5574.45
C11	18	375178	81287.7	73682.9	524572	3790.84
C12	18	344573	75831.9	60554.4	459239	2928.31
D1	18	866849	161918	87108.1	627398	5618.6
D2	18	640039	110186	52853.9	377038	2175.88
D3	18	612179	102596	59568.7	399257	2487.49
D4	18	314375	75284.7	64223.7	405257	3091.23
D5	18	420600	100297	86812.7	515203	4213.12
D6	18	350547	82798.3	76045.7	451892	3009.24
D7	18	487266	84888.1	85430.6	444658	5674.28
D8	18	357464	74242.1	82031	487416	3626.03
D9	18	220886	52303.5	57970.1	368957	2472.17
D10	18	358746	83475	79435.9	513407	3104.14
D11	18	348755	86381.2	76968.9	535692	2081.12
D12	18	360860	93245.6	73492.2	550891	3546.59
E1	18	1.03889e+06	188889	89586.2	637770	5557.53
E2	18	740578	122375	59833.1	425171	2920.59
E3	18	743984	119479	64847.7	424127	2395.4
E4	18	692526	120464	84573.5	511232	3325.7
E5	18	831611	141113	94625.9	555520	3754.08
E6	18	713479	119573	82927.4	479081	3459.48
E7	18	298005	67490.4	76427.8	445372	3192.22
E8	18	375692	91349.4	96366.8	569626	3593.28
E9	18	253156	63437.8	67100.5	419926	2230.95
E10	18	636794	90067	93292.3	512247	7044.07
E11	18	424431	80796.3	84658.7	571308	4243.48
E12	18	424491	82260.9	78726.1	578450	4415.28
F1	18	991104	195774	89837.2	623008	5009.64
F2	18	651304	115817	59152.5	421344	2348.81
F3	18	742380	124773	67775.9	438687	2436.38
F4	18	423120	93559.6	82300.5	502002	3726.2
F5	18	554082	122380	107176	639474	3735.19
F6	18	461597	102308	91865.5	534598	3952.64
F7	18	307522	75762.7	85884.2	512498	3114.68
F8	18	399217	98021.4	103169	611957	4705.94
F9	18	286697	73198.6	76009.6	479093	2394.25
F10	18	565681	99653	98827.5	597522	5770.62
F11	18	470015	107688	96979.3	667756	2974.67
F12	18	414474	97588.6	80592.2	605814	3585.73
G1	18	514142	46759	26703	22862.4	6948.95
G2	18	262499	23409.1	12780.8	11046	2625.54
G3	18	292354	27007	15383	12258	3284.36
G4	18	359185	35024.5	20935.4	17899.3	5147.83
G5	18	372740	36420.6	22078.1	18798.8	5276.09
G6	18	412281	41502.1	25856.2	21862.6	6657.9
G7	18	305618	30830.6	19320.2	25218.4	7266.22
G8	18	283616	28136	17363	14549.8	4222.16
G9	18	254788	24638.6	14772.5	12066.5	3848.98
G10	18	369060	33923.5	19336.6	16067.6	4050.53
G11	18	359681	33924.7	19849.2	16799.9	4600.54
G12	18	412220	36450.9	20061.7	17396.2	4781.17
H1	18	648937	57855.5	31816.5	27537.2	7896.53
H2	18	296510	25424.1	14055.1	12103	3173.39
H3	18	293769	26379.7	14711.1	12639.9	4100.31
H4	18	342861	32297.3	19123.6	16679.3	5401.06
H5	18	444564	43018.3	25923.4	22334.5	6329.35
H6	18	452727	44560.2	27005.4	23277.8	7061.76
H7	18	312773	30076.6	17868.5	15519.1	4154.85
H8	18	302329	28168.5	17034.2	14742.3	4474.13
H9	18	271089	25063.5	14551	13117.2	4082.39
H10	18	479113	44184.8	25213.1	21406.4	6060.59
H11	18	416423	38125.4	21259.6	18541.2	5827.94
H12	18	445965	39006.9	20013.5	17726	4795.23
A1	19	403123	101150	58676.7	506469	3387.64
A2	19	242735	61999.6	39548.7	326231	1725.3
A3	19	225947	57261.3	39365.4	319343	1294.74
A4	19	843939	122982	52705	383231	2697.57
A5	19	985255	141490	59169.9	422237	2511.23
A6	19	820593	113676	51607.3	373610	1847.89
A7	19	447287	62237.6	60382.9	366899	4702.28
A8	19	300091	62064.5	63175.4	451772	3215.49
A9	19	260085	57078.5	55236.8	407185	2335.66
A10	19	478248	84834.2	71614.1	495318	4568.23
A11	19	446792	93843.8	72475.6	567578	351.525
A12	19	453832	99030.7	67498.2	542028	3822.2
B1	19	673643	97787.1	68777.4	441359	7222.92
B2	19	457008	77516.4	44320.3	333131	2565.23
B3	19	475335	76984.3	42351.3	314492	1627.13
B4	19	470729	82135.7	52090.4	365556	9611.91
B5	19	498117	87858.8	60378.1	408145	2938.21
B6	19	487487	84368.5	57791.9	382939	2339.89
B7	19	300298	51217.9	54384	344482	3366.64
B8	19	290553	60895.9	62175	412994	3047.66
B9	19	213367	47792.9	48426.8	340927	1862.03
B10	19	345493	81657.8	66059.4	455311	3226.3
B11	19	356167	88021.6	70274.2	515848	2838.91
B12	19	360509	93509.1	64361.3	503175	3096.7
C1	19	1.20765e+06	207503	74884.5	564895	4770.76
C2	19	857363	131228	47983.6	360954	2791.89
C3	19	815924	117592	47535.7	339564	1884.13
C4	19	261557	60170	52194.7	345501	2662.63
C5	19	360807	83567.4	70966.9	444299	3181.07
C6	19	293970	68842.9	63084.3	398395	2665.8
C7	19	257215	68173.8	63640	404291	2547.13
C8	19	274348	65710.7	66633	429982	2180.61
C9	19	201615	50129.4	50598.5	343316	1393.54
C10	19	516386	80129.1	77139.7	461196	5394.48
C11	19	374892	81402.1	73842	524741	3760.21
C12	19	344408	75760.1	60556.6	459174	2816.27
D1	19	986511	177226	86994.7	627488	5966.15
D2	19	751056	122179	52807.2	377140	1942.39
D3	19	718939	113970	59453.4	399599	2558.71
D4	19	332347	77209	64282.7	405208	3009.31
D5	19	444862	102718	86966	515520	4144.52
D6	19	374439	85024.9	76028.6	452277	3235.7
D7	19	487326	85184.4	85397.6	444734	5632.04
D8	19	357692	74068.8	81960.1	487446	3405.26
D9	19	221556	52611.7	57898	368899	2742.82
D10	19	358584	83206.7	79419	513167	3188.75
D11	19	349165	86620.7	77040.4	535294	2036.82
D12	19	360922	93300.3	73595.6	550257	3218.43
E1	19	1.16527e+06	204808	89296.2	638126	5383.94
E2	19	842830	133654	59667.9	424908	2807.86
E3	19	846497	129697	64852	424799	2548.93
E4	19	825518	132842	84362.6	511583	3600.59
E5	19	987063	154981	94413.7	555425	3845.62
E6	19	856129	131745	82718.1	479570	3297.34
E7	19	298278	67411	76497.6	445596	3387.4
E8	19	376937	91221.9	96382	569426	3865.93
E9	19	252889	63415.1	67167.9	419627	2465.06
E10	19	636886	89846.7	93348.2	512412	7268.43
E11	19	423659	80834.8	84683.3	570758	4491.09
E12	19	424711	82105.5	78857.8	578965	4407.97
F1	19	1.1299e+06	212962	89808.5	623948	4994.81
F2	19	753248	126659	59035.8	420750	1997.72
F3	19	867184	137965	67500.3	438807	2797.25
F4	19	470579	98176.6	82220.4	502217	3532.9
F5	19	621922	128649	107293	640020	3972.05
F6	19	517265	107605	91902.3	535201	3899.88
F7	19	307260	75802	86050.3	513146	3050.6
F8	19	399874	98106.4	102968	611565	4816.25
F9	19	287024	73254.8	75836.1	478479	2539.84
F10	19	565022	99557.2	98549.9	596698	5942.23
F11	19	469662	108007	96918	668574	3111.55
F12	19	414266	97706.2	80371.9	605410	4152.12
G1	19	512793	46457.6	26664.3	22910.5	6839.08
G2	19	262194	23395	12889.4	11163.1	3084.4
G3	19	291919	26828.8	15399.4	12068	3327.29
G4	19	358129	34673.8	21073.3	17737.2	5337.36
G5	19	372300	36357.6	21982.8	18902.7	5581.2
G6	19	412008	41524.3	25855.3	21872.7	6518.1
G7	19	305411	30782	19334.1	25249.9	6891.66
G8	19	283596	28012.1	17181.5	14593.2	4426.23
G9	19	254156	24611.3	14881.6	12334.1	3596.37
G10	19	368325	34049	19218.2	15974.6	4169.48
G11	19	359540	34195	19845.5	16673.7	4419.23
G12	19	412317	36386.6	19973	17503.6	5024.24
H1	19	647946	58004.4	31883.1	27229.8	7442.92
H2	19	296485	25640.5	13896.8	12232.7	3400.06
H3	19	293878	26229.2	14788	12451	3737.92
H4	19	342623	32357.8	19083.3	16644.2	4786.84
H5	19	443539	43218.6	25757.5	22203.4	6881.91
H6	19	452261	44522.2	27032	23083	6803.46
H7	19	312239	30173.9	17862.7	15521	3868.78
H8	19	302201	28533.7	16957.3	14982.7	4476.91
H9	19	270358	25288.5	14583.9	13020.1	4094.17
H10	19	478965	43986.1	25301.3	22021.5	6543.42
H11	19	415416	38304	21456.6	18791.2	5930.26
H12	19	444819	39229.2	20099.1	17261.8	5094.6
A1	20	424453	103791	59025.3	506670	2715.94
A2	20	260709	64293.6	39597.9	326332	1791.12
A3	20	245440	59450.6	39552.1	318808	1258.45
A4	20	924773	131802	52597.1	383007	2325.58
A5	20	1.07533e+06	150557	59185.4	422282	2295.75
A6	20	897440	121372	51574.7	373381	1556.5
A7	20	446574	62445.7	60650.6	367261	5011.95
A8	20	300691	61981.2	63311.2	451760	3026.2
A9	20	261006	56911	55004.3	407655	2424.34
A10	20	478707	85096.2	71590.1	495392	4577.29
A11	20	447421	93794.9	72540.7	567583	309.568
A12	20	453619	98834.4	67425.8	541435	3956.24
B1	20	673973	97957.6	68652.4	440801	6927.18
B2	20	521158	85193.1	44111.6	333292	2652.77
B3	20	547631	84838.6	42329.9	314295	1823.28
B4	20	570153	91546.2	52081.8	365658	9394.59
B5	20	600865	96943.4	60382.4	408277	2694.7
B6	20	593518	93935.9	57719.8	382927	2704.72
B7	20	300854	51102.3	54378	344457	3361.28
B8	20	291319	60780.6	62102.8	412793	3181.3
B9	20	213472	47799.4	48389.8	340471	1848.07
B10	20	346564	81655.1	66289.9	455777	2897.65
B11	20	357531	87877.6	70279.3	515851	3211.48
B12	20	361756	93663.7	64273.8	503086	3214.26
C1	20	1312108	221691	74776.1	564964	4667.5
C2	20	929356	139415	47960.5	360253	2409.62
C3	20	881363	124315	47491.6	339406	1828.88
C4	20	275017	61674.7	52065.4	345486	2573.74
C5	20	380193	85282.7	70879.3	444218	3493.45
C6	20	312593	70568.6	63152.6	398357	2347.03
C7	20	257816	68447	63704.4	403880	2648.89
C8	20	274600	65962.1	66664.8	429423	2757.1
C9	20	201983	50068.3	50902.2	343486	1598.52
C10	20	516341	80184.2	77218.9	461541	5846.56
C11	20	375377	81903.9	73547	525009	3619.27
C12	20	345485	75660.6	60507.9	458512	2709.73
D1	20	1.11153e+06	192806	86966.1	627189	5871.25
D2	20	856682	133917	52717.9	377206	2058.13
D3	20	825928	124611	59338.1	399657	2451.89
D4	20	366528	80356.1	64223.7	404704	2878.04
D5	20	490288	106881	86820.6	516042	4444.16
D6	20	417251	88607.6	75810.8	452285	2945.9
D7	20	487709	85290.8	85434.5	445069	5967.04
D8	20	358250	74119.8	82096.9	487580	3657.81
D9	20	221644	52398.2	57851.9	369192	2327.14
D10	20	358946	83283.5	79207.5	513609	3423.19
D11	20	350480	86554	76970.8	535751	2045.49
D12	20	361781	93615	73494.2	550391	3629.63
E1	20	1.27941e+06	219273	89159.2	638553	5435.88
E2	20	933969	143605	59662.3	425629	2509.54
E3	20	941499	139464	64731	424832	2785.2
E4	20	951187	145358	84188.1	511206	3770.02
E5	20	1136189	168659	94531.8	555112	3839.51
E6	20	985622	143314	82676.3	479493	3253.39
E7	20	299176	67651	76369.8	445088	3320.07
E8	20	377369	91480.9	96329.5	568952	3921.88
E9	20	253723	63589.8	67050.3	419544	2377.84
E10	20	637499	89699.8	93263.9	513015	7212.79
E11	20	424778	80935.4	84578.5	570774	4580.81
E12	20	425120	81995.1	78916.6	579092	4209.79
F1	20	1258420	229856	89509.1	623790	4942.91
F2	20	850172	136388	58622	421096	1725.04
F3	20	977948	149177	67490.8	438291	2209.01
F4	20	545902	105555	82053.2	501970	3970.91
F5	20	730014	138671	106895	640305	3987.06
F6	20	605840	115530	91881.3	535263	3718.74
F7	20	307599	75802.9	86032.4	512683	3366.18
F8	20	399883	98007.7	103142	611728	4548.06
F9	20	287604	73714.2	76045	478480	2559.26
F10	20	564885	99658.3	98690.3	597081	5920.91
F11	20	469951	107801	97157.9	667765	2886.82
F12	20	415082	97680.4	80678.4	606760	3930.38
G1	20	513349	46572.9	26698.4	23169.3	6416.16
G2	20	261987	23406.5	12921.8	10930.2	2924.91
G3	20	291938	26750.4	15388.1	12185.3	3243.95
G4	20	358062	34608.3	20844.8	17747.1	5006.67
G5	20	371928	36125.4	21855.1	18838.8	5387.38
G6	20	411823	41465.6	25786	22057.9	6993.99
G7	20	305265	30568.8	19309.2	25296.3	6782.37
G8	20	284110	27852.2	17099.5	14013.4	4282.41
G9	20	254082	24361.4	14652.4	12284.8	3375.21
G10	20	368016	34014.1	19320.3	16008.5	3829.02
G11	20	359127	34160.6	19860.2	16917.6	4842.29
G12	20	412413	35946	19966.4	17273.8	4767.6
H1	20	647360	58357.5	31816.5	27000.1	7876.15
H2	20	295635	25656.5	13903.8	11953.4	3040.59
H3	20	294036	26004.2	14840.9	12703.7	3716.53
H4	20	342260	32451.4	18995.2	16543.7	5584.48
H5	20	443203	43007.3	25839.5	22463.7	6760.21
H6	20	452447	44667.1	27086.1	23037.2	6974.17
H7	20	312168	29999.5	17947.3	15478.1	4202.21
H8	20	302078	28437	16928.6	14833	4477.84
H9	20	269767	25360.7	14564.8	12931.6	4100.59
H10	20	479236	44093.2	25282.7	22058.4	6384.12
H11	20	416133	38349.7	21164.4	18665.5	5972.78
H12	20	444589	39465.8	20290.5	17579.2	5023.75
A1	21	462864	109224	58639.3	506098	2949.07
A2	21	291916	68338	39627.4	325792	1406.78
A3	21	279262	63245.6	39511.5	319258	1619.4
A4	21	994512	138856	52592.7	383258	2628.2
A5	21	1.14871e+06	157993	59079.2	422848	2494.22
A6	21	961819	127527	51662.3	373627	2087.11
A7	21	446855	62524.8	60569.4	366866	4843.04
A8	21	300640	62137.8	63449.6	452343	3159.87
A9	21	260937	57133.7	55157.4	407842	2448.44
A10	21	479195	85110.4	71710.8	496108	4857.08
A11	21	447499	94109.8	72584.2	567720	604.395
A12	21	453401	99064.7	67554.9	541208	4144.17
B1	21	675372	98417.5	68808.6	440651	7390.77
B2	21	585057	92664.2	44207.9	333077	2621.74
B3	21	617194	92157.2	42479.4	314745	1438.82
B4	21	668586	101045	51885	365916	9734.37
B5	21	705574	105999	60313.1	408169	2629.81
B6	21	699138	103398	57666.2	383072	2632.88
B7	21	300946	51056.5	54493.2	344640	3458.39
B8	21	291497	60876.2	62159.3	413236	3141.53
B9	21	213625	47915.8	48354.5	340973	1830
B10	21	346036	81871.3	66048.7	455407	3281.97
B11	21	357493	88344.8	70366.2	515993	3322.33
B12	21	362172	93467.8	64298.5	502176	2992.58
C1	21	1.40154e+06	233181	74778.5	564921	4561.78
C2	21	988189	145831	48014.1	360354	2258.37
C3	21	937516	129689	47545.1	339440	2006.81
C4	21	298428	63752.1	52077.1	344775	2768.12
C5	21	415262	88421.6	71070.6	444153	3233.88
C6	21	344868	73544.3	63176.6	398618	2383.16
C7	21	258197	68692.1	63859.6	404806	2979.59
C8	21	275274	65876.2	66717.8	430293	2641.64
C9	21	201729	50454.1	50729.6	343481	1150.54
C10	21	516721	79965.6	77317.8	461729	5246.69
C11	21	376071	81726.3	73569.2	524731	3672.38
C12	21	345583	75930.3	60733.6	459324	2720.71
D1	21	1.2318e+06	209330	87003.1	628022	5667.9
D2	21	950907	144111	52461	377058	2039.01
D3	21	922582	134834	59353.1	399487	2655.36
D4	21	421307	85848.2	64273.1	405132	2870.14
D5	21	563973	113433	87010.2	515932	4371.52
D6	21	488060	95028.1	76141.7	452585	2912.32
D7	21	487849	85408.4	85486	444370	5880.59
D8	21	358947	74404.9	81965.9	487709	3786.59
D9	21	221678	52643	58084.1	368420	2645.86
D10	21	359086	83536.8	79394.3	513320	3542.18
D11	21	350118	86639.4	77045.2	535994	2194.76
D12	21	362222	93487.2	73556.1	550426	3419.08
E1	21	1.38404e+06	232176	89095.4	639241	5295.1
E2	21	1.01009e+06	151582	59669	425412	2812.42
E3	21	1.01811e+06	147296	64548	424907	2331.16
E4	21	1069809	156700	84203.5	511762	3596.11
E5	21	1.27057e+06	180721	94316.6	555132	3760.18
E6	21	1.1013e+06	153394	82510.8	479915	3321.76
E7	21	299580	68013.8	76590	445228	3471.33
E8	21	378078	91684.9	96753.1	568917	3753
E9	21	254459	63683.5	67094.1	419332	2500.86
E10	21	636979	89660	93306.5	512900	7367.15
E11	21	424512	80808.5	84697.8	572097	4232.72
E12	21	424844	81865.3	79007.8	577968	4260.15
F1	21	1.36712e+06	243852	89557.5	623596	4610.71
F2	21	928534	145970	58698.6	421332	1962.61
F3	21	1.07206e+06	159420	67379	438603	2516.69
F4	21	650228	115412	82088.6	502124	3422.88
F5	21	882837	152260	107045	640182	3887.38
F6	21	729148	126359	91869	535219	3885.81
F7	21	307938	76089.9	86151.3	512331	3017.13
F8	21	400676	98289.3	103019	611705	4800.06
F9	21	287602	73312.1	76039.6	478249	2781.43
F10	21	564872	99675.3	98710.5	597048	5856.96
F11	21	469573	107818	97001.1	667920	3157.52
F12	21	414769	97560.9	80608.2	607772	4055.86
G1	21	513467	46846.2	26698.4	23147.6	6503.45
[truncated: 10,967 more rows]

## Sheet: Multicomponent Data
Block Type	96alum
Chemistry	SYBR_GREEN
Experiment File Name	D:\Documents and Settings\INSTR-ADMIN\Recent\1116Untitled.eds
Experiment Run End Time	2013-01-09 02:38:13 AM CST
Instrument Type	sds7500
Passive Reference	ROX
Well	Cycle	SYBR	ROX
A1	1	378748	521398
A2	1	215204	330142
A3	1	198878	320065
A4	1	301674	386017
A5	1	302163	424908
A6	1	242600	377720
A7	1	444053	369329
A8	1	291906	452863
A9	1	253625	408880
A10	1	474003	498910
A11	1	438289	571556
A12	1	457967	564693
B1	1	672573	448548
B2	1	260489	335942
B3	1	210868	311206
B4	1	252361	364638
B5	1	273517	407944
B6	1	256224	383851
B7	1	295123	342822
B8	1	280417	409273
B9	1	209026	342628
B10	1	339857	460515
B11	1	349123	518357
B12	1	356701	512471
C1	1	462617	570908
C2	1	238051	358183
C3	1	213043	335837
C4	1	238230	345235
C5	1	325634	444544
C6	1	263918	396629
C7	1	243679	401977
C8	1	263051	424912
C9	1	194077	341699
C10	1	507914	456216
C11	1	363115	522963
C12	1	340080	464610
D1	1	540607	630826
D2	1	261228	377020
D3	1	275190	395465
D4	1	282792	403880
D5	1	377038	511233
D6	1	313187	451386
D7	1	485601	447651
D8	1	342508	478856
D9	1	214508	367960
D10	1	349594	510915
D11	1	339331	530826
D12	1	357890	560029
E1	1	542705	639570
E2	1	279907	419714
E3	1	285416	418616
E4	1	367395	508930
E5	1	401948	549281
E6	1	334647	477368
E7	1	288432	446858
E8	1	359482	564620
E9	1	246180	421143
E10	1	634810	512645
E11	1	413681	567893
E12	1	427859	586567
F1	1	515395	629743
F2	1	265319	416574
F3	1	283538	437287
F4	1	356293	499173
F5	1	455166	635131
F6	1	384870	532386
F7	1	300966	517047
F8	1	383965	607371
F9	1	277710	477960
F10	1	558669	592133
F11	1	453206	664602
F12	1	412690	613317
G1	1
G2	1
G3	1
G4	1
G5	1
G6	1
G7	1
G8	1
G9	1
G10	1
G11	1
G12	1
H1	1
H2	1
H3	1
H4	1
H5	1
H6	1
H7	1
H8	1
H9	1
H10	1
H11	1
H12	1
A1	2	378710	522849
A2	2	216399	328836
A3	2	199659	319684
A4	2	302577	384884
A5	2	303216	424021
A6	2	242992	376643
A7	2	445609	369538
A8	2	293642	453319
A9	2	253806	406831
A10	2	474890	497585
A11	2	438650	571153
A12	2	458290	563619
B1	2	672131	448529
B2	2	260401	334757
B3	2	212043	311681
B4	2	254014	364608
B5	2	274793	408068
B6	2	257716	382852
B7	2	296285	342724
B8	2	282805	410475
B9	2	209681	342112
B10	2	340593	459576
B11	2	349850	517217
B12	2	357537	511461
C1	2	462684	571483
C2	2	239319	358463
C3	2	214984	336979
C4	2	239670	345260
C5	2	328498	444868
C6	2	265092	396817
C7	2	245949	402078
C8	2	264586	425931
C9	2	194998	341024
C10	2	509715	456671
C11	2	364457	523047
C12	2	340193	463095
D1	2	541262	631219
D2	2	261275	376521
D3	2	276903	396654
D4	2	283670	403238
D5	2	379719	513021
D6	2	313915	451482
D7	2	485585	447651
D8	2	345638	481308
D9	2	215708	368222
D10	2	351138	511522
D11	2	340649	531698
D12	2	357457	557619
E1	2	544584	640286
E2	2	282310	420664
E3	2	287478	420156
E4	2	370105	509119
E5	2	405605	551010
E6	2	337539	477305
E7	2	290525	446137
E8	2	362884	566588
E9	2	246960	420641
E10	2	634895	512205
E11	2	415597	567920
E12	2	427545	584778
F1	2	516808	630093
F2	2	268504	417589
F3	2	284258	437710
F4	2	358820	500054
F5	2	458400	636128
F6	2	386247	532712
F7	2	302820	517175
F8	2	386926	609123
F9	2	278865	477868
F10	2	560594	593350
F11	2	454440	664547
F12	2	414125	612895
G1	2
G2	2
G3	2
G4	2
G5	2
G6	2
G7	2
G8	2
G9	2
G10	2
G11	2
G12	2
H1	2
H2	2
H3	2
H4	2
H5	2
H6	2
H7	2
H8	2
H9	2
H10	2
H11	2
H12	2
A1	3	377068	519594
A2	3	217263	328372
A3	3	200081	318814
A4	3	303223	384627
A5	3	303428	423315
A6	3	242737	375647
A7	3	445481	368702
A8	3	294379	452522
A9	3	254477	406133
A10	3	474901	496531
A11	3	438294	569158
A12	3	456596	560910
B1	3	669960	445948
B2	3	261033	334004
B3	3	214215	311624
B4	3	254837	364705
B5	3	276358	407823
B6	3	258246	383319
B7	3	296584	342892
B8	3	284020	410204
B9	3	209536	340666
B10	3	339979	457632
B11	3	348472	515428
B12	3	356835	508740
C1	3	462760	569560
C2	3	239886	358325
C3	3	216147	336716
C4	3	240850	345211
C5	3	329687	444898
C6	3	267050	397631
C7	3	247238	402216
C8	3	265149	426431
C9	3	195239	341345
C10	3	511110	457311
C11	3	365827	522464
C12	3	340798	461893
D1	3	542059	629580
D2	3	261575	375667
D3	3	277267	396653
D4	3	284709	403107
D5	3	382187	513724
D6	3	315083	451337
D7	3	486043	446796
D8	3	347666	482447
D9	3	216299	367720
D10	3	352328	512304
D11	3	340973	531101
D12	3	357394	556375
E1	3	546073	639469
E2	3	284114	421228
E3	3	288699	420772
E4	3	371962	510136
E5	3	407962	552587
E6	3	339473	478309
E7	3	291283	445701
E8	3	364573	568070
E9	3	247771	420611
E10	3	634911	512759
E11	3	416760	568222
E12	3	426741	581789
F1	3	517572	629241
F2	3	269756	418490
F3	3	285341	438273
F4	3	360155	501595
F5	3	460486	637512
F6	3	388064	533529
F7	3	303848	516284
F8	3	388540	609523
F9	3	280857	477976
F10	3	561811	594620
F11	3	456663	664384
F12	3	414567	611221
G1	3
G2	3
G3	3
G4	3
G5	3
G6	3
G7	3
G8	3
G9	3
G10	3
G11	3
G12	3
H1	3
H2	3
H3	3
H4	3
H5	3
H6	3
H7	3
H8	3
H9	3
H10	3
H11	3
H12	3
A1	4	376849	517903
A2	4	217567	328035
A3	4	200796	319130
A4	4	304357	384471
A5	4	304956	423054
A6	4	243608	375216
A7	4	445788	367709
A8	4	294409	451657
A9	4	255555	406126
A10	4	475049	496323
A11	4	439426	568310
A12	4	456856	558714
B1	4	668577	444722
B2	4	261578	333876
B3	4	214963	312090
B4	4	255851	365123
B5	4	277067	408455
B6	4	259607	383529
B7	4	297808	342998
B8	4	285359	410398
B9	4	210396	340856
B10	4	341207	457290
B11	4	350077	515372
B12	4	357385	507571
C1	4	462504	566825
C2	4	241576	358305
C3	4	217709	337554
C4	4	242090	345516
C5	4	331789	445945
C6	4	268201	397901
C7	4	248609	402591
C8	4	266623	427633
C9	4	196557	341527
C10	4	512326	458468
C11	4	367483	523044
C12	4	341033	460879
D1	4	542920	629205
D2	4	263463	375929
D3	4	279463	397464
D4	4	285948	404746
D5	4	383392	515525
D6	4	316572	451780
D7	4	486554	446989
D8	4	349443	484062
D9	4	217134	368180
D10	4	353254	512618
D11	4	342437	532477
D12	4	358078	554604
E1	4	547218	639119
E2	4	285852	422299
E3	4	290540	421709
E4	4	373399	510569
E5	4	409708	553895
E6	4	340919	479035
E7	4	292963	446714
E8	4	366861	568263
E9	4	248754	420864
E10	4	635741	513108
E11	4	418012	568146
E12	4	425947	580671
F1	4	517566	627770
F2	4	270456	419589
F3	4	287176	438898
F4	4	361405	501892
F5	4	462427	638173
F6	4	389917	534585
F7	4	304763	516290
F8	4	390775	610644
F9	4	282426	479210
F10	4	563224	595313
F11	4	457829	665897
F12	4	415251	610929
G1	4
G2	4
G3	4
G4	4
G5	4
G6	4
G7	4
G8	4
G9	4
G10	4
G11	4
G12	4
H1	4
H2	4
H3	4
H4	4
H5	4
H6	4
H7	4
H8	4
H9	4
H10	4
H11	4
H12	4
A1	5	377382	516562
A2	5	218590	327861
A3	5	201422	318924
A4	5	305310	384652
A5	5	305889	423628
A6	5	244250	375365
A7	5	445882	368001
A8	5	296261	452631
A9	5	256653	406786
A10	5	476119	496593
A11	5	440463	568505
A12	5	455009	557213
B1	5	669154	444578
B2	5	262705	334124
B3	5	216309	312634
B4	5	256664	365316
B5	5	277411	408787
B6	5	260041	383945
B7	5	298372	343590
B8	5	286798	411584
B9	5	211305	340666
B10	5	341823	457767
B11	5	350778	516134
B12	5	357763	505925
C1	5	463720	566452
C2	5	243073	359258
C3	5	218329	337870
C4	5	243372	345720
C5	5	333126	445766
C6	5	269262	398747
C7	5	250303	403356
C8	5	268374	428188
C9	5	197487	342041
C10	5	513253	459157
C11	5	368760	523644
C12	5	341338	460239
D1	5	544733	628739
D2	5	264514	376763
D3	5	280623	398007
D4	5	287739	404741
D5	5	386276	515673
D6	5	318091	452002
D7	5	487019	447349
D8	5	351217	484762
D9	5	218381	368634
D10	5	355049	513685
D11	5	343997	533449
D12	5	358434	554489
E1	5	549345	638752
E2	5	286277	423074
E3	5	291727	422946
E4	5	374730	511466
E5	5	412129	554622
E6	5	343138	479274
E7	5	294634	446636
E8	5	368220	569716
E9	5	250440	421051
E10	5	636232	513657
E11	5	419501	569809
E12	5	425786	581114
F1	5	518992	627285
F2	5	270620	420356
F3	5	288099	439540
F4	5	363039	502960
F5	5	464697	640033
F6	5	391206	535314
F7	5	305719	516604
F8	5	392639	611394
F9	5	283313	479187
F10	5	564750	596980
F11	5	459592	666016
F12	5	414984	608550
G1	5
G2	5
G3	5
G4	5
G5	5
G6	5
G7	5
G8	5
G9	5
G10	5
G11	5
G12	5
H1	5
H2	5
H3	5
H4	5
H5	5
H6	5
H7	5
H8	5
H9	5
H10	5
H11	5
H12	5
A1	6	377857	515513
A2	6	219677	327564
A3	6	202269	319252
A4	6	306484	383879
A5	6	307617	423500
A6	6	244658	374964
A7	6	445746	368170
A8	6	296758	452231
A9	6	257639	407010
A10	6	476651	496464
A11	6	441514	567920
A12	6	455785	555017
B1	6	669179	443219
B2	6	264090	334358
B3	6	217131	312839
B4	6	257746	365972
B5	6	278998	408470
B6	6	260929	383758
B7	6	299461	343828
B8	6	287553	412003
B9	6	211875	340960
B10	6	343433	458125
B11	6	352108	516900
B12	6	359039	505942
C1	6	465594	565705
C2	6	244265	359487
C3	6	219710	338297
C4	6	244287	345890
C5	6	334303	445800
C6	6	270188	398781
C7	6	251497	403343
C8	6	268827	428534
C9	6	198041	342571
C10	6	514626	460346
C11	6	369742	523842
C12	6	343156	460745
D1	6	545597	628088
D2	6	265631	377352
D3	6	281751	398083
D4	6	288885	405118
D5	6	387590	515868
D6	6	319554	452077
D7	6	487113	446971
D8	6	352779	485412
D9	6	219060	369168
D10	6	355969	513830
D11	6	345332	533989
D12	6	359169	553945
E1	6	550030	638693
E2	6	288212	423447
E3	6	293241	423249
E4	6	377263	512297
E5	6	413639	555221
E6	6	343861	479308
E7	6	295484	446774
E8	6	370146	569963
E9	6	250911	421357
E10	6	636857	514254
E11	6	420553	570671
E12	6	426344	580035
F1	6	521021	626618
F2	6	270480	419784
F3	6	289165	439590
F4	6	364122	502775
F5	6	466232	639876
F6	6	392567	535574
F7	6	306539	516456
F8	6	394328	612134
F9	6	284193	480166
F10	6	565539	597437
F11	6	461585	666945
F12	6	415305	609845
G1	6
G2	6
G3	6
G4	6
G5	6
G6	6
G7	6
G8	6
G9	6
G10	6
G11	6
G12	6
H1	6
H2	6
H3	6
H4	6
H5	6
H6	6
H7	6
H8	6
H9	6
H10	6
H11	6
H12	6
A1	7	378801	514874
A2	7	220919	327592
A3	7	203412	319358
A4	7	307800	383970
A5	7	309185	423229
A6	7	246065	374878
A7	7	445718	367892
A8	7	297720	452451
A9	7	259028	407506
A10	7	477999	496646
A11	7	442967	567967
A12	7	456620	553933
B1	7	669358	443576
B2	7	264856	334356
B3	7	218228	313256
B4	7	258403	365420
B5	7	279728	409016
B6	7	261708	384010
B7	7	300039	344232
B8	7	288499	412561
B9	7	212610	340698
B10	7	343887	457486
B11	7	353536	516084
B12	7	360296	505301
C1	7	467582	565477
C2	7	246110	359565
C3	7	221807	337854
C4	7	244818	346323
C5	7	335426	445988
C6	7	271566	399256
C7	7	252716	404076
C8	7	270024	428815
C9	7	198908	342621
C10	7	515060	460756
C11	7	371615	524544
C12	7	343755	460353
D1	7	548092	627755
D2	7	266705	377206
D3	7	282891	399012
D4	7	289581	405561
D5	7	388810	516479
D6	7	321118	452792
D7	7	487146	446843
D8	7	353819	486354
D9	7	219439	369808
D10	7	357079	514127
D11	7	346004	534598
D12	7	359914	553075
E1	7	551971	639048
E2	7	289517	423875
E3	7	294165	423330
E4	7	377856	512505
E5	7	415387	555713
E6	7	345321	480193
E7	7	295699	446982
E8	7	371379	569928
E9	7	251875	421421
E10	7	636705	514831
E11	7	421643	570578
E12	7	426485	580022
F1	7	523428	626431
F2	7	272409	421258
F3	7	290890	440026
F4	7	364889	503102
F5	7	468046	640694
F6	7	393431	536347
F7	7	306892	516588
F8	7	395171	612746
F9	7	285631	480273
F10	7	566437	597987
F11	7	463015	668484
F12	7	416126	608222
G1	7
G2	7
G3	7
G4	7
G5	7
G6	7
G7	7
G8	7
G9	7
G10	7
G11	7
G12	7
H1	7
H2	7
H3	7
H4	7
H5	7
H6	7
H7	7
H8	7
H9	7
H10	7
H11	7
H12	7
A1	8	379665	513178
A2	8	220846	327387
A3	8	203442	319121
A4	8	310217	384377
A5	8	311139	423690
A6	8	248047	374744
A7	8	446411	367872
A8	8	298113	452423
A9	8	259403	407605
A10	8	478627	496945
A11	8	444242	568469
A12	8	455976	551942
B1	8	668840	442761
B2	8	265005	334585
B3	8	219191	313498
B4	8	259465	365697
B5	8	280768	409476
B6	8	262634	383997
B7	8	300676	344168
B8	8	288844	412492
B9	8	213164	341223
B10	8	344951	458273
B11	8	354149	517136
B12	8	360499	505265
C1	8	469601	565582
C2	8	249492	360072
C3	8	223709	338763
C4	8	245634	346358
C5	8	336967	446352
C6	8	272487	399453
C7	8	253871	403605
C8	8	271262	429526
C9	8	199575	343368
C10	8	515756	460653
C11	8	372815	524772
C12	8	344645	460097
D1	8	549448	629114
D2	8	268554	377169
D3	8	284157	399719
D4	8	291195	405506
D5	8	390136	517101
D6	8	322309	453325
D7	8	487327	447447
D8	8	354946	486975
D9	8	220385	369742
D10	8	358036	514782
D11	8	347291	535014
D12	8	361478	553363
E1	8	554969	639161
E2	8	292123	424749
E3	8	296068	424512
E4	8	379298	512920
E5	8	417216	555738
E6	8	346858	480508
E7	8	297393	447363
E8	8	372532	570963
E9	8	252895	421563
E10	8	636264	514992
E11	8	422687	570753
E12	8	427048	580518
F1	8	524597	626572
F2	8	275542	421478
F3	8	292471	440121
F4	8	365867	503584
F5	8	469971	641047
F6	8	394515	536494
F7	8	308308	516720
F8	8	396929	613138
F9	8	286288	481154
F10	8	566352	598218
F11	8	464367	669069
F12	8	416623	608352
G1	8
G2	8
G3	8
G4	8
G5	8
G6	8
G7	8
G8	8
G9	8
G10	8
G11	8
G12	8
H1	8
H2	8
H3	8
H4	8
H5	8
H6	8
H7	8
H8	8
H9	8
H10	8
H11	8
H12	8
A1	9	380248	512770
A2	9	221468	326909
A3	9	204764	319474
A4	9	311647	384212
A5	9	314234	423117
A6	9	250548	374519
A7	9	446630	368269
A8	9	299154	452368
A9	9	259926	407716
A10	9	479045	496816
A11	9	445856	567918
A12	9	456704	551580
B1	9	668959	442504
B2	9	266249	334210
B3	9	220133	314141
B4	9	260041	366419
B5	9	281351	408911
B6	9	263390	383969
B7	9	300229	344127
B8	9	289842	412644
B9	9	213801	341477
B10	9	345893	457671
B11	9	355089	517413
B12	9	362360	505121
C1	9	474550	565293
C2	9	252991	360645
C3	9	227593	338845
C4	9	246686	346373
C5	9	337841	445877
C6	9	272891	399603
C7	9	254645	404320
C8	9	272016	429474
C9	9	200355	343315
C10	9	516619	461578
C11	9	373707	525198
C12	9	345249	460422
D1	9	551710	628976
D2	9	270493	377053
D3	9	285745	399567
D4	9	291856	406026
D5	9	391420	517049
D6	9	323303	453021
D7	9	488286	447473
D8	9	355673	487440
D9	9	221057	369167
D10	9	358831	514611
D11	9	348315	534877
D12	9	362075	552981
E1	9	557145	638214
E2	9	294401	424266
E3	9	299619	424517
E4	9	380980	512794
E5	9	419322	556116
E6	9	348352	480903
E7	9	297824	446969
E8	9	373854	570935
E9	9	253303	421919
E10	9	637436	514945
E11	9	423530	570738
E12	9	427060	579859
F1	9	527494	625571
F2	9	276502	421413
F3	9	294401	440044
F4	9	366387	503139
F5	9	470597	641227
F6	9	395174	537176
F7	9	308476	516463
F8	9	397819	613013
F9	9	286841	480573
F10	9	567522	599589
F11	9	465447	668024
F12	9	417299	609008
G1	9
G2	9
G3	9
G4	9
G5	9
G6	9
G7	9
G8	9
G9	9
G10	9
G11	9
G12	9
H1	9
H2	9
H3	9
H4	9
H5	9
H6	9
H7	9
H8	9
H9	9
H10	9
H11	9
H12	9
A1	10	380700	511626
A2	10	222056	327122
A3	10	204525	319084
A4	10	316446	384301
A5	10	320380	422943
A6	10	254966	374774
A7	10	446254	368495
A8	10	300177	452460
A9	10	260345	407719
A10	10	479490	496832
A11	10	446231	568397
A12	10	456823	550451
B1	10	669661	442406
B2	10	266930	333860
B3	10	221371	314014
B4	10	261406	365955
B5	10	281942	408548
B6	10	263756	383874
B7	10	300933	344350
B8	10	290544	412783
B9	10	213997	341111
B10	10	346505	457703
B11	10	355829	517071
B12	10	362723	504212
C1	10	480973	565534
C2	10	260182	360293
C3	10	234384	338810
C4	10	246614	346690
C5	10	338923	446294
C6	10	273978	399409
C7	10	255535	403846
C8	10	273185	429603
C9	10	201007	343212
C10	10	516400	461604
C11	10	373841	525318
C12	10	345518	460818
D1	10	554259	628814
D2	10	273411	377596
D3	10	288261	399480
D4	10	292811	406034
D5	10	392389	517301
D6	10	323916	452988
D7	10	488519	447089
D8	10	356436	487496
D9	10	221361	369877
D10	10	359441	514883
D11	10	348972	535423
D12	10	362828	552633
E1	10	562900	638306
E2	10	299090	424520
E3	10	303348	424791
E4	10	382678	512702
E5	10	421923	555867
E6	10	350812	480469
E7	10	298325	447366
E8	10	375110	571332
E9	10	254251	421559
E10	10	636864	515037
E11	10	423603	572612
E12	10	426752	580197
F1	10	531475	625939
F2	10	277914	421286
F3	10	297865	440125
F4	10	367125	503716
F5	10	472126	641335
F6	10	395660	536382
F7	10	308997	515819
F8	10	398582	613426
F9	10	287841	480621
F10	10	567497	599733
F11	10	466819	669576
F12	10	417929	607807
G1	10
G2	10
G3	10
G4	10
G5	10
G6	10
G7	10
G8	10
G9	10
G10	10
G11	10
G12	10
H1	10
H2	10
H3	10
H4	10
H5	10
H6	10
H7	10
H8	10
H9	10
H10	10
H11	10
H12	10
A1	11	381633	511570
A2	11	222334	327019
A3	11	205363	319669
A4	11	323630	384095
A5	11	329750	422396
A6	11	263390	373879
A7	11	447098	367835
A8	11	300341	452504
A9	11	261337	407663
A10	11	479737	496742
A11	11	446103	568624
A12	11	456661	550518
B1	11	669177	442259
B2	11	267966	334235
B3	11	223574	314190
B4	11	262412	366081
B5	11	283813	409460
B6	11	265194	383655
B7	11	301370	344486
B8	11	290812	412497
B9	11	214348	340890
B10	11	347136	457117
B11	11	357735	517149
B12	11	363197	505027
C1	11	494575	565599
C2	11	271675	360008
C3	11	246804	339130
C4	11	247492	346218
C5	11	339765	445805
C6	11	274590	399476
C7	11	256230	404338
C8	11	273356	429514
C9	11	201581	343201
C10	11	517430	462241
C11	11	375428	525395
C12	11	346795	459904
D1	11	558532	628714
D2	11	278537	377767
D3	11	292509	399626
D4	11	293901	405958
D5	11	393676	516777
D6	11	324928	453749
D7	11	488403	447513
D8	11	357051	487851
D9	11	221880	369774
D10	11	359829	514812
D11	11	350458	536044
D12	11	362746	552855
E1	11	570547	639074
E2	11	307299	424760
E3	11	311500	424992
E4	11	385611	513492
E5	11	426583	556154
E6	11	354532	480181
E7	11	298707	447284
E8	11	375983	571338
E9	11	254497	421804
E10	11	636699	515142
E11	11	424481	572548
E12	11	426984	580831
F1	11	538644	625594
F2	11	282782	421667
F3	11	302712	439968
F4	11	368019	503356
F5	11	473876	640816
F6	11	397117	536617
F7	11	309300	516247
F8	11	400513	613542
F9	11	288709	480556
F10	11	567847	599231
F11	11	467527	667807
F12	11	417843	607070
G1	11
G2	11
G3	11
G4	11
G5	11
G6	11
G7	11
G8	11
G9	11
G10	11
G11	11
G12	11
H1	11
H2	11
H3	11
H4	11
H5	11
H6	11
H7	11
H8	11
H9	11
H10	11
H11	11
H12	11
A1	12	382011	510874
A2	12	223106	326697
A3	12	206244	319309
A4	12	336756	384165
A5	12	347348	422450
A6	12	277999	374169
A7	12	447418	368288
A8	12	301076	452811
A9	12	261717	408016
A10	12	479973	497050
A11	12	447850	568793
A12	12	457547	548424
B1	12	669932	442205
B2	12	270267	334327
B3	12	226441	314034
B4	12	264579	365975
B5	12	285540	408984
B6	12	267162	383848
B7	12	301794	344867
B8	12	291257	412941
B9	12	214242	341541
B10	12	347756	457692
B11	12	358031	517006
B12	12	364031	505101
C1	12	517412	565981
C2	12	294084	360269
C3	12	268314	338801
C4	12	248333	346493
C5	12	340960	445598
C6	12	275690	399474
C7	12	257101	404109
C8	12	273758	429651
C9	12	201917	343705
C10	12	517125	462087
C11	12	376186	525708
C12	12	346803	460431
D1	12	565049	628911
D2	12	286220	377426
D3	12	299366	399782
D4	12	294774	406183
D5	12	394798	517086
D6	12	325993	453427
D7	12	488670	447328
D8	12	357871	488186
D9	12	222673	369852
D10	12	361027	515281
D11	12	351179	535867
D12	12	363998	552748
E1	12	584286	639456
E2	12	320397	425268
E3	12	324217	424930
E4	12	391298	512784
E5	12	433504	556304
E6	12	360814	480881
E7	12	299144	447431
E8	12	376699	571840
E9	12	254878	422185
E10	12	636807	515904
E11	12	425173	572317
E12	12	427984	580681
F1	12	548841	625641
F2	12	292529	421701
F3	12	312995	440296
F4	12	369343	503635
F5	12	475034	641688
F6	12	397917	537042
F7	12	309836	515767
F8	12	400643	613646
F9	12	289143	480837
F10	12	567840	599742
F11	12	467977	668454
F12	12	418751	608669
G1	12
G2	12
G3	12
G4	12
G5	12
G6	12
G7	12
G8	12
G9	12
G10	12
G11	12
G12	12
H1	12
H2	12
H3	12
H4	12
H5	12
H6	12
H7	12
H8	12
H9	12
H10	12
H11	12
H12	12
A1	13	383287	510189
A2	13	223744	327009
A3	13	206694	319556
A4	13	360984	384145
A5	13	378988	423222
A6	13	304992	373966
A7	13	447239	368247
A8	13	301476	452289
A9	13	261896	407823
A10	13	480638	496831
A11	13	447582	568336
A12	13	456929	547365
B1	13	670482	443102
B2	13	273890	333946
B3	13	231872	313978
B4	13	267582	365930
B5	13	288363	408714
B6	13	270588	383732
B7	13	301657	344309
B8	13	291407	413593
B9	13	214643	340887
B10	13	347655	457524
B11	13	358793	516860
B12	13	364551	504857
C1	13	558697	565636
C2	13	331824	360603
C3	13	305688	339224
C4	13	248923	346497
C5	13	341031	445205
C6	13	276163	398993
C7	13	257649	404934
C8	13	274799	430118
C9	13	202510	343680
C10	13	517629	462715
C11	13	376301	525702
C12	13	346766	460332
D1	13	576612	628895
D2	13	301171	377422
D3	13	311495	399803
D4	13	295407	405782
D5	13	396430	517006
D6	13	327350	454126
D7	13	489227	447402
D8	13	358757	488119
D9	13	222535	370045
D10	13	360986	514907
D11	13	351722	536019
D12	13	364259	552296
E1	13	608447	639428
E2	13	345027	425462
E3	13	348470	425059
E4	13	400135	512996
E5	13	445947	556683
E6	13	371837	480421
E7	13	299852	447416
E8	13	378154	571464
E9	13	255218	421481
E10	13	637158	515453
E11	13	425548	572270
E12	13	427307	580198
F1	13	567705	625798
F2	13	307903	422043
F3	13	331107	440014
F4	13	370471	503498
F5	13	477793	641636
F6	13	399297	537033
F7	13	310240	516045
F8	13	401670	614004
F9	13	289147	480729
F10	13	568016	600295
F11	13	468575	669010
F12	13	419088	608084
G1	13
G2	13
G3	13
G4	13
G5	13
G6	13
G7	13
G8	13
G9	13
G10	13
G11	13
G12	13
H1	13
H2	13
H3	13
H4	13
H5	13
H6	13
H7	13
H8	13
H9	13
H10	13
H11	13
H12	13
A1	14	384616	509721
A2	14	224731	327198
A3	14	207445	318987
A4	14	402617	383859
A5	14	434116	422689
A6	14	352521	373623
A7	14	446942	368279
A8	14	302076	452844
A9	14	262145	408050
A10	14	481020	497194
A11	14	448536	568820
A12	14	457135	546566
B1	14	671056	442848
B2	14	282048	333436
B3	14	242018	314334
B4	14	273254	366088
B5	14	294553	408394
B6	14	276060	383558
B7	14	301820	344568
B8	14	291936	413354
B9	14	215532	341154
B10	14	348738	457210
B11	14	359730	516839
B12	14	364855	504776
C1	14	624812	565979
C2	14	391930	360469
C3	14	365764	339289
C4	14	249366	346314
C5	14	342606	445859
C6	14	276814	399307
C7	14	258357	404367
C8	14	275731	430542
C9	14	202688	343107
C10	14	518569	462372
C11	14	377205	525696
C12	14	346924	460329
D1	14	597382	629362
D2	14	327659	377568
D3	14	334346	399643
D4	14	296877	405949
D5	14	397839	517398
D6	14	329212	454097
D7	14	489242	447417
D8	14	359295	488527
D9	14	223198	370101
D10	14	362473	514814
D11	14	352520	536165
D12	14	364823	552837
E1	14	649686	638842
E2	14	385863	425716
E3	14	389235	425527
E4	14	418081	513811
E5	14	469110	556429
E6	14	392775	480987
E7	14	300282	447369
E8	14	379178	571725
E9	14	255746	421255
E10	14	637286	515274
E11	14	426186	571522
E12	14	428581	580939
F1	14	599687	625791
F2	14	333986	422037
F3	14	364268	440186
F4	14	372866	504358
F5	14	481676	641823
F6	14	403242	536656
F7	14	310465	515092
F8	14	402716	614117
F9	14	290218	480682
F10	14	569140	600116
F11	14	470305	669213
F12	14	419561	608919
G1	14
G2	14
G3	14
G4	14
G5	14
G6	14
G7	14
G8	14
G9	14
G10	14
G11	14
G12	14
H1	14
H2	14
H3	14
H4	14
H5	14
H6	14
H7	14
H8	14
H9	14
H10	14
H11	14
H12	14
A1	15	385936	508844
A2	15	225926	327029
A3	15	208759	319405
A4	15	468179	383887
A5	15	520582	423181
A6	15	426897	373834
A7	15	447936	367840
A8	15	302737	452668
A9	15	262627	408375
A10	15	480967	497157
A11	15	448923	568699
A12	15	458386	546765
B1	15	670426	442640
B2	15	294486	334159
B3	15	259879	314479
B4	15	283682	366065
B5	15	304958	408852
B6	15	287402	383512
B7	15	302037	344726
B8	15	292295	413398
B9	15	215744	341617
B10	15	348866	457274
B11	15	360362	517102
B12	15	365765	505090
C1	15	720909	565718
C2	15	477554	360783
C3	15	450279	339440
C4	15	250070	346367
C5	15	343922	445150
C6	15	277599	399153
C7	15	259086	404909
C8	15	276156	429962
C9	15	202973	343466
C10	15	517985	462917
C11	15	377449	525700
C12	15	347794	460750
D1	15	633090	629436
D2	15	372217	377522
D3	15	372345	400420
D4	15	298555	405525
D5	15	400037	517462
D6	15	331476	453873
D7	15	488919	447764
D8	15	359699	488867
D9	15	223572	369988
D10	15	362296	514655
D11	15	352947	536464
D12	15	365103	551953
E1	15	715311	639171
E2	15	449503	425755
E3	15	451972	425708
E4	15	447993	512662
E5	15	509621	556632
E6	15	429199	480996
E7	15	300432	447454
E8	15	379020	572239
E9	15	255842	421264
E10	15	637309	515656
E11	15	425975	572657
E12	15	428123	579902
F1	15	656649	626084
F2	15	381903	422046
F3	15	419164	440079
F4	15	377131	503679
F5	15	487683	641863
F6	15	408090	537227
F7	15	310853	515184
F8	15	403276	614400
F9	15	290230	480389
F10	15	568652	599767
F11	15	470633	669187
F12	15	419546	609193
G1	15
G2	15
G3	15
G4	15
G5	15
G6	15
G7	15
G8	15
G9	15
G10	15
G11	15
G12	15
H1	15
H2	15
H3	15
H4	15
H5	15
H6	15
H7	15
H8	15
H9	15
H10	15
H11	15
H12	15
A1	16	387249	508305
A2	16	227466	326769
A3	16	210330	319291
A4	16	558096	383900
A5	16	638008	422846
A6	16	527686	373975
A7	16	447514	368663
A8	16	302914	452593
A9	16	262716	408190
A10	16	481039	497314
A11	16	449717	568479
A12	16	457872	545498
B1	16	671695	442733
B2	16	316389	334137
B3	16	290604	314891
B4	16	302795	366218
B5	16	324541	408924
B6	16	307355	383266
B7	16	302244	344694
B8	16	292479	413609
B9	16	215911	340996
B10	16	349176	456778
B11	16	360677	517556
B12	16	365589	504758
C1	16	839439	565368
C2	16	577899	360763
C3	16	549390	340020
C4	16	251759	345980
C5	16	345724	445165
C6	16	279717	399506
C7	16	259544	404839
C8	16	276722	431171
C9	16	203276	343809
C10	16	518791	463104
C11	16	378310	526319
C12	16	347848	460424
D1	16	689524	628623
D2	16	442184	377624
D3	16	432325	400103
D4	16	302074	406049
D5	16	404787	517496
D6	16	335363	453783
D7	16	489756	447685
D8	16	360004	488728
D9	16	223788	370203
D10	16	362911	515345
D11	16	353139	537181
D12	16	365467	552096
E1	16	808937	639650
E2	16	539559	425836
E3	16	541066	425790
E4	16	502004	513649
E5	16	580088	556673
E6	16	492435	480568
E7	16	301000	447168
E8	16	380075	571088
E9	16	256341	421329
E10	16	637116	516173
E11	16	426801	572817
E12	16	427641	579403
F1	16	745054	626203
F2	16	453699	421686
F3	16	506750	440593
F4	16	385805	503736
F5	16	499459	642209
F6	16	417653	537293
F7	16	311353	515483
F8	16	403880	614091
F9	16	290942	480385
F10	16	568662	599783
F11	16	470753	669410
F12	16	419756	607318
G1	16
G2	16
G3	16
G4	16
G5	16
G6	16
G7	16
G8	16
G9	16
G10	16
G11	16
G12	16
H1	16
H2	16
H3	16
H4	16
H5	16
H6	16
H7	16
H8	16
H9	16
H10	16
H11	16
H12	16
A1	17	390235	507876
A2	17	230324	326740
A3	17	213678	319453
A4	17	658822	384004
A5	17	769304	422867
A6	17	635600	373290
A7	17	447402	368511
A8	17	302456	452606
A9	17	263144	408059
A10	17	480463	496951
A11	17	450386	569211
A12	17	457554	544709
B1	17	671096	443097
B2	17	351460	333994
B3	17	338951	314780
B4	17	336377	366246
B5	17	359241	408712
B6	17	343640	383423
B7	17	302226	345102
B8	17	292965	413977
B9	17	215546	341289
B10	17	349470	456629
B11	17	361212	517815
B12	17	366248	504826
C1	17	970759	565580
C2	17	679166	360666
C3	17	646938	339755
C4	17	254444	345987
C5	17	349272	445386
C6	17	282836	399431
C7	17	260136	405282
C8	17	277241	430541
C9	17	204009	343504
C10	17	518744	463274
C11	17	379154	525929
C12	17	348153	460150
D1	17	771499	628995
D2	17	536892	377374
D3	17	517142	400278
D4	17	307857	405769
D5	17	412287	517013
D6	17	342555	454158
D7	17	489324	447936
D8	17	360828	489622
D9	17	223768	369935
D10	17	362902	515025
D11	17	354110	537104
D12	17	365915	552080
E1	17	922395	639632
E2	17	641721	425441
E3	17	644468	425541
E4	17	585437	513012
E5	17	689043	556792
E6	17	590063	480889
E7	17	300737	446959
E8	17	380887	571378
E9	17	256884	421373
E10	17	637142	515876
E11	17	427272	572985
E12	17	427982	580187
F1	17	865233	625690
F2	17	550551	422021
F3	17	621650	439950
F4	17	400819	503876
F5	17	520961	642416
F6	17	435076	537076
F7	17	311280	514795
F8	17	404250	614368
F9	17	291123	480397
F10	17	569053	600260
F11	17	471620	669760
F12	17	419480	608530
G1	17
G2	17
G3	17
G4	17
G5	17
G6	17
G7	17
G8	17
G9	17
G10	17
G11	17
G12	17
H1	17
H2	17
H3	17
H4	17
H5	17
H6	17
H7	17
H8	17
H9	17
H10	17
H11	17
H12	17
A1	18	397230	507312
A2	18	236263	326618
A3	18	219566	319033
A4	18	756879	383624
A5	18	883157	422989
A6	18	734988	373321
A7	18	448119	368781
A8	18	303171	453011
A9	18	263569	408326
A10	18	481379	496936
A11	18	450487	568555
A12	18	457594	543992
B1	18	671766	442618
B2	18	400734	334035
B3	18	403534	314679
B4	18	391896	366271
B5	18	416683	408822
B6	18	403409	383299
B7	18	302365	345024
B8	18	293649	413609
B9	18	215831	341261
B10	18	350276	456448
B11	18	361812	516818
B12	18	366532	504450
C1	18	1.09517e+06	566338
C2	18	772088	361088
C3	18	736782	339907
C4	18	258075	345362
C5	18	355090	445092
C6	18	288326	399499
C7	18	260813	405403
C8	18	277253	430607
C9	18	204363	344040
C10	18	518589	463148
C11	18	379370	525888
C12	18	348399	460426
D1	18	872460	629192
D2	18	643840	377856
D3	18	616004	400163
D4	18	318683	406348
D5	18	426273	517128
D6	18	355144	453577
D7	18	489795	447801
D8	18	361224	489410
D9	18	223849	370093
D10	18	363480	515175
D11	18	354020	537276
D12	18	366740	552401
E1	18	1.04512e+06	639684
E2	18	744446	426085
E3	18	748094	425367
E4	18	697046	513231
E5	18	837394	557806
E6	18	718330	481135
E7	18	301495	447289
E8	18	380858	572095
E9	18	256895	421462
E10	18	636770	515675
E11	18	427947	573340
E12	18	427801	580218
F1	18	999305	625404
F2	18	655724	422500
F3	18	747006	440307
F4	18	428177	503999
F5	18	560686	642026
F6	18	467092	536961
F7	18	311864	514468
F8	18	404889	614559
F9	18	291115	480759
F10	18	569680	600507
F11	18	472464	670011
F12	18	419909	607524
G1	18
G2	18
G3	18
G4	18
G5	18
G6	18
G7	18
G8	18
G9	18
G10	18
G11	18
G12	18
H1	18
H2	18
H3	18
H4	18
H5	18
H6	18
H7	18
H8	18
H9	18
H10	18
H11	18
H12	18
A1	19	408388	507339
A2	19	246051	326696
A3	19	229440	319647
A4	19	845673	383901
A5	19	987640	422846
A6	19	822011	373707
A7	19	448199	368440
A8	19	303108	452483
A9	19	263072	407801
A10	19	480955	496879
A11	19	450934	568837
A12	19	457979	543367
B1	19	672804	443648
B2	19	459043	333861
B3	19	477503	314908
B4	19	473861	366157
B5	19	501662	408872
B6	19	490847	383594
B7	19	302269	345376
B8	19	293329	413816
B9	19	215983	341492
B10	19	350203	456418
B11	19	361465	517197
B12	19	366333	504437
C1	19	1.21268e+06	566234
C2	19	860279	361525
C3	19	818374	340006
C4	19	264914	346258
C5	19	365468	445629
C6	19	297778	399418
C7	19	261129	405178
C8	19	278104	430954
C9	19	204594	343925
C10	19	518743	463493
C11	19	379102	526074
C12	19	348227	460362
D1	19	991941	629254
D2	19	754661	377940
D3	19	722736	400474
D4	19	336665	406307
D5	19	450539	517457
D6	19	379034	453950
D7	19	489881	447872
D8	19	361433	489430
D9	19	224543	370027
D10	19	363292	514936
D11	19	354453	536891
D12	19	366809	551785
E1	19	1.17131e+06	639991
E2	19	846566	425797
E3	19	850507	426018
E4	19	829935	513533
E5	19	992744	557676
E6	19	860873	481572
E7	19	301760	447518
E8	19	382080	571901
E9	19	256628	421178
E10	19	636836	515844
E11	19	427190	572802
E12	19	427996	580741
F1	19	1.13789e+06	626320
F2	19	757492	421899
F3	19	871737	440384
F4	19	475599	504195
F5	19	628466	642575
F6	19	522750	537554
F7	19	311607	515127
F8	19	405547	614148
F9	19	291444	480133
F10	19	569019	599661
F11	19	472150	670812
F12	19	419721	607103
G1	19
G2	19
G3	19
G4	19
G5	19
G6	19
G7	19
G8	19
G9	19
G10	19
G11	19
G12	19
H1	19
H2	19
H3	19
H4	19
H5	19
H6	19
H7	19
H8	19
H9	19
H10	19
H11	19
H12	19
A1	20	429543	507568
A2	20	263964	326799
A3	20	248863	319138
A4	20	926302	383658
A5	20	1.07746e+06	422884
A6	20	898666	373466
A7	20	447520	368831
A8	20	303690	452489
A9	20	263957	408235
A10	20	481440	496949
A11	20	451544	568848
A12	20	457741	542773
B1	20	673152	443084
B2	20	523055	333992
B3	20	549665	314704
B4	20	573050	366243
B5	20	604160	408993
B6	20	596690	383560
B7	20	302806	345350
B8	20	294073	413608
B9	20	216087	341039
B10	20	351258	456904
B11	20	362789	517200
B12	20	367577	504340
C1	20	1.31705e+06	566277
C2	20	932171	360823
C3	20	883736	339837
C4	20	278382	346224
C5	20	384830	445536
C6	20	316395	399388
C7	20	261751	404784
C8	20	278380	430412
C9	20	204952	344132
C10	20	518706	463843
C11	20	379641	526303
C12	20	349270	459701
D1	20	1.11671e+06	628939
D2	20	860139	377984
D3	20	829614	400505
D4	20	370816	405802
D5	20	495936	517943
D6	20	421806	453924
D7	20	490270	448206
D8	20	361991	489580
D9	20	224608	370308
D10	20	363656	515345
D11	20	355740	537334
D12	20	367694	551907
E1	20	1.2853e+06	640386
E2	20	937574	426498
E3	20	945449	426027
E4	20	955590	513127
E5	20	1.14181e+06	557377
E6	20	990317	481478
E7	20	302672	447002
E8	20	382533	571429
E9	20	257471	421081
E10	20	637424	516426
E11	20	428305	572805
E12	20	428383	580872
F1	20	1.26635e+06	626122
F2	20	854180	422192
F3	20	982384	439867
F4	20	550870	503924
F5	20	736468	642797
F6	20	611262	537606
F7	20	311944	514670
F8	20	405547	614331
F9	20	292065	480162
F10	20	568895	600056
F11	20	472415	670040
F12	20	420519	608470
G1	20
G2	20
G3	20
G4	20
G5	20
G6	20
G7	20
G8	20
G9	20
G10	20
G11	20
G12	20
H1	20
H2	20
H3	20
H4	20
H5	20
H6	20
H7	20
H8	20
H9	20
H10	20
H11	20
H12	20
A1	21	467753	506961
A2	21	295076	326264
A3	21	282564	319575
A4	21	995792	383897
A5	21	1.15065e+06	423421
A6	21	962850	373710
A7	21	447807	368432
A8	21	303658	453080
A9	21	263917	408438
A10	21	481922	497670
A11	21	451664	568988
A12	21	457564	542561
B1	21	674589	442952
B2	21	586792	333784
B3	21	619068	315158
B4	21	671270	366460
B5	21	708593	408869
B6	21	702115	383683
B7	21	302892	345546
B8	21	294259	414051
B9	21	216251	341528
B10	21	350764	456511
B11	21	362811	517351
B12	21	367956	503442
C1	21	1.40632e+06	566225
C2	21	990888	360922
C3	21	939779	339871
C4	21	301750	345525
C5	21	419861	445494
C6	21	348657	399645
C7	21	262151	405714
C8	21	279038	431271
C9	21	204740	344104
C10	21	519056	464039
C11	21	380303	526032
C12	21	349404	460528
D1	21	1.23696e+06	629752
D2	21	954198	377798
D3	21	926234	400331
D4	21	425589	406223
D5	21	569555	517854
D6	21	492594	454258
D7	21	490421	447528
D8	21	362708	489689
D9	21	224666	369581
D10	21	363823	515084
D11	21	355394	537583
D12	21	368111	551948
E1	21	1.38973e+06	641047
E2	21	1.01355e+06	426278
E3	21	1.022e+06	426069
E4	21	1074151	513663
E5	21	1.27611e+06	557360
E6	21	1.10593e+06	481858
E7	21	303105	447171
E8	21	383254	571453
E9	21	258209	420878
E10	21	636906	516318
E11	21	428027	574123
E12	21	428095	579772
F1	21	1.37495e+06	625926
F2	21	932555	422434
F3	21	1076475	440156
F4	21	655087	504070
F5	21	889103	642690
F6	21	734463	537554
F7	21	312307	514342
F8	21	406360	614292
F9	21	292022	479934
F10	21	568884	600026
F11	21	472043	670176
F12	21	420195	609464
G1	21
[truncated: 10,967 more rows]

## Sheet: Amplification Data
Block Type	96alum
Chemistry	SYBR_GREEN
Experiment File Name	D:\Documents and Settings\INSTR-ADMIN\Recent\1116Untitled.eds
Experiment Run End Time	2013-01-09 02:38:13 AM CST
Instrument Type	sds7500
Passive Reference	ROX
Well	Cycle	Target Name	Rn	ΔRn
A1	1	18S	0.726408	0.00675189
A1	2	18S	0.724319	0.00195045
A1	3	18S	0.725697	0.000615619
A1	4	18S	0.727644	-0.000149929
A1	5	18S	0.730565	5.82248e-05
A1	6	18S	0.732973	-0.000245983
A1	7	18S	0.735715	-0.000216166
A1	8	18S	0.739832	0.00118778
A1	9	18S	0.741558	0.000201691
A1	10	18S	0.744097	2.86727e-05
A1	11	18S	0.746004	-0.00077681
A1	12	18S	0.747761	-0.0017325
A1	13	18S	0.751265	-0.000941469
A1	14	18S	0.754562	-0.000356257
A1	15	18S	0.758457	0.000825837
A1	16	18S	0.761845	0.00150129
A1	17	18S	0.768367	0.00531058
A1	18	18S	0.783008	0.0172399
A1	19	18S	0.804961	0.0364804
A1	20	18S	0.846276	0.0750829
A1	21	18S	0.92266	0.148754
A1	22	18S	1.04839	0.27177
A1	23	18S	1.23949	0.460163
A1	24	18S	1.47837	0.696326
A1	25	18S	1.73482	0.950068
A1	26	18S	1.9752	1.18773
A1	27	18S	2.20036	1.41018
A1	28	18S	2.39981	1.60692
A1	29	18S	2.56107	1.76546
A1	30	18S	2.69954	1.90122
A1	31	18S	2.81037	2.00934
A1	32	18S	2.91448	2.11074
A1	33	18S	3.00083	2.19438
A1	34	18S	3.06767	2.2585
A1	35	18S	3.13267	2.32079
A1	36	18S	3.19624	2.38164
A1	37	18S	3.24899	2.43168
A1	38	18S	3.2987	2.47869
A1	39	18S	3.325	2.50227
A1	40	18S	3.35801	2.53257
A2	1	18S	0.651853	-0.00555734
A2	2	18S	0.658076	-0.0017257
A2	3	18S	0.661638	-0.00055379
A2	4	18S	0.663243	-0.00134013
A2	5	18S	0.666715	-0.000259063
A2	6	18S	0.670638	0.00127345
A2	7	18S	0.674372	0.00261654
A2	8	18S	0.67457	0.000424188
A2	9	18S	0.677462	0.000924709
A2	10	18S	0.678819	-0.000109173
A2	11	18S	0.679882	-0.00143643
A2	12	18S	0.682916	-0.00079369
A2	13	18S	0.684215	-0.00188539
A2	14	18S	0.686833	-0.00165738
A2	15	18S	0.690845	-3.64699e-05
A2	16	18S	0.696105	0.00283262
A2	17	18S	0.704913	0.00924974
A2	18	18S	0.723362	0.0253078
A2	19	18S	0.75315	0.0527048
A2	20	18S	0.807727	0.104891
A2	21	18S	0.90441	0.199184
A2	22	18S	1.05929	0.351675
A2	23	18S	1.28815	0.578141
A2	24	18S	1.5567	0.844299
A2	25	18S	1.82878	1.11399
A2	26	18S	2.06455	1.34737
A2	27	18S	2.28128	1.56171
A2	28	18S	2.46615	1.74419
A2	29	18S	2.61315	1.88879
A2	30	18S	2.73499	2.00825
A2	31	18S	2.83869	2.10956
A2	32	18S	2.91996	2.18843
A2	33	18S	3.0033	2.26938
A2	34	18S	3.06112	2.32481
A2	35	18S	3.11539	2.37669
A2	36	18S	3.17443	2.43334
A2	37	18S	3.2138	2.47032
A2	38	18S	3.24961	2.50374
A2	39	18S	3.28717	2.53891
A2	40	18S	3.30947	2.55882
A3	1	18S	0.621367	-0.00198401
A3	2	18S	0.624552	-0.000854302
A3	3	18S	0.627578	0.000116263
A3	4	18S	0.6292	-0.000317815
A3	5	18S	0.631568	-4.56991e-06
A3	6	18S	0.633571	-5.7059e-05
A3	7	18S	0.636938	0.00125415
A3	8	18S	0.637508	-0.000231238
A3	9	18S	0.640941	0.00114541
A3	10	18S	0.640975	-0.000875638
A3	11	18S	0.642423	-0.00148358
A3	12	18S	0.645908	-5.4122e-05
A3	13	18S	0.646815	-0.00120197
A3	14	18S	0.650325	0.000251874
A3	15	18S	0.653587	0.00145829
A3	16	18S	0.65874	0.00455549
A3	17	18S	0.668887	0.012647
A3	18	18S	0.688224	0.0299283
A3	19	18S	0.717792	0.0574415
A3	20	18S	0.779799	0.117393
A3	21	18S	0.884185	0.219723
A3	22	18S	1.05984	0.393322
A3	23	18S	1.31302	0.64445
A3	24	18S	1.61398	0.943349
A3	25	18S	1.91667	1.24398
A3	26	18S	2.18157	1.50683
A3	27	18S	2.42528	1.74848
A3	28	18S	2.62645	1.9476
A3	29	18S	2.79683	2.11592
A3	30	18S	2.93239	2.24943
A3	31	18S	3.04781	2.36279
A3	32	18S	3.14464	2.45757
A3	33	18S	3.22007	2.53094
A3	34	18S	3.2867	2.59552
A3	35	18S	3.35795	2.66471
A3	36	18S	3.40571	2.71041
A3	37	18S	3.4576	2.76025
A3	38	18S	3.49951	2.80011
A3	39	18S	3.52509	2.82362
A3	40	18S	3.56612	2.86261
A4	1	18S	0.781504	0.0011877
A4	2	18S	0.786151	0.00217244
A4	3	18S	0.788356	0.000714824
A4	4	18S	0.791625	0.000321924
A4	5	18S	0.79373	-0.00123613
A4	6	18S	0.798385	-0.000243637
A4	7	18S	0.801625	-0.000666161
A4	8	18S	0.807063	0.00110918
A4	9	18S	0.811132	0.00151575
A4	10	18S	0.823433	0.0101544
A4	11	18S	0.842578	0.0256367
A4	12	18S	0.876594	0.0559901
A4	13	18S	0.939706	0.11544
A4	14	18S	1.04887	0.220938
A4	15	18S	1.21958	0.387985
A4	16	18S	1.45375	0.618499
A4	17	18S	1.71566	0.876748
A4	18	18S	1.97297	1.13039
A4	19	18S	2.20284	1.3566
A4	20	18S	2.41439	1.56449
A4	21	18S	2.5939	1.74034
A4	22	18S	2.73496	1.87773
A4	23	18S	2.86388	2.00298
A4	24	18S	2.96842	2.10386
A4	25	18S	3.05689	2.18868
A4	26	18S	3.12919	2.25731
A4	27	18S	3.19591	2.32037
A4	28	18S	3.24955	2.37035
A4	29	18S	3.30426	2.42139
A4	30	18S	3.34531	2.45878
A4	31	18S	3.37517	2.48497
A4	32	18S	3.41507	2.52121
A4	33	18S	3.43972	2.54221
A4	34	18S	3.46823	2.56705
A4	35	18S	3.49644	2.5916
A4	36	18S	3.51282	2.60432
A4	37	18S	3.52615	2.61398
A4	38	18S	3.54415	2.62832
A4	39	18S	3.56482	2.64532
A4	40	18S	3.58532	2.66216
A5	1	18S	0.711126	0.00154851
A5	2	18S	0.715097	0.0020572
A5	3	18S	0.716791	0.000287147
A5	4	18S	0.720844	0.000877081
A5	5	18S	0.72207	-0.00135932
A5	6	18S	0.726369	-0.00052411
A5	7	18S	0.730538	0.000182113
A5	8	18S	0.734356	0.000537086
A5	9	18S	0.742666	0.00538351
A5	10	18S	0.757502	0.0167567
A5	11	18S	0.780665	0.0364559
A5	12	18S	0.822222	0.0745495
A5	13	18S	0.895483	0.144347
A5	14	18S	1.02703	0.272437
A5	15	18S	1.23017	0.472104
A5	16	18S	1.50884	0.747317
A5	17	18S	1.81926	1.05427
A5	18	18S	2.08789	1.31944
A5	19	18S	2.3357	1.56378
A5	20	18S	2.5479	1.77252
A5	21	18S	2.71752	1.93868
A5	22	18S	2.8712	2.0889
A5	23	18S	2.98942	2.20365
A5	24	18S	3.0935	2.30427
A5	25	18S	3.17162	2.37893
A5	26	18S	3.23782	2.44166
A5	27	18S	3.30557	2.50595
A5	28	18S	3.35409	2.551
A5	29	18S	3.39925	2.59271
A5	30	18S	3.43305	2.62304
A5	31	18S	3.47026	2.65679
A5	32	18S	3.4954	2.67846
A5	33	18S	3.52109	2.70069
A5	34	18S	3.54805	2.72419
A5	35	18S	3.5698	2.74247
A5	36	18S	3.59024	2.75945
A5	37	18S	3.59742	2.76317
A5	38	18S	3.61691	2.77919
A5	39	18S	3.62825	2.78708
A5	40	18S	3.64644	2.8018
A6	1	18S	0.642276	0.00254959
A6	2	18S	0.64515	0.00251495
A6	3	18S	0.646183	0.000638048
A6	4	18S	0.649249	0.000794617
A6	5	18S	0.6507	-0.000663563
A6	6	18S	0.652483	-0.0017901
A6	7	18S	0.656385	-0.000797816
A6	8	18S	0.661911	0.00181882
A6	9	18S	0.668986	0.0059838
A6	10	18S	0.680318	0.0144064
A6	11	18S	0.704481	0.03566
A6	12	18S	0.742979	0.0712485
A6	13	18S	0.81556	0.14092
A6	14	18S	0.943519	0.26597
A6	15	18S	1.14194	0.461483
A6	16	18S	1.41102	0.727653
A6	17	18S	1.7027	1.01642
A6	18	18S	1.96878	1.27959
A6	19	18S	2.19961	1.50752
A6	20	18S	2.40628	1.71128
A6	21	18S	2.57646	1.87854
A6	22	18S	2.71576	2.01494
A6	23	18S	2.82652	2.12278
A6	24	18S	2.92201	2.21537
A6	25	18S	3.00368	2.29412
A6	26	18S	3.06868	2.35621
A6	27	18S	3.13076	2.41539
A6	28	18S	3.18229	2.46401
A6	29	18S	3.22124	2.50005
A6	30	18S	3.25897	2.53486
A6	31	18S	3.29129	2.56428
A6	32	18S	3.3239	2.59398
A6	33	18S	3.34505	2.61222
A6	34	18S	3.36715	2.63141
A6	35	18S	3.3912	2.65255
A6	36	18S	3.41008	2.66852
A6	37	18S	3.42766	2.68319
A6	38	18S	3.44466	2.69728
A6	39	18S	3.45677	2.70649
A6	40	18S	3.4786	2.7254
A7	1	CBF1	1.20232	-0.00954335
A7	2	CBF1	1.20585	-0.00613636
A7	3	CBF1	1.20824	-0.0038746
A7	4	CBF1	1.21234	0.000100787
A7	5	CBF1	1.21164	-0.000728317
A7	6	CBF1	1.21071	-0.0017813
A7	7	CBF1	1.21154	-0.00106688
A7	8	CBF1	1.21349	0.000757974
A7	9	CBF1	1.21278	-7.68522e-05
A7	10	CBF1	1.21102	-0.00196787
A7	11	CBF1	1.21549	0.00237635
A7	12	CBF1	1.21486	0.00162521
A7	13	CBF1	1.21451	0.0011492
A7	14	CBF1	1.2136	0.000114938
A7	15	CBF1	1.21775	0.00414349
A7	16	CBF1	1.21388	0.000152602
A7	17	CBF1	1.21408	0.000224362
A7	18	CBF1	1.21514	0.00115753
A7	19	CBF1	1.21648	0.00237525
A7	20	CBF1	1.21335	-0.000879526
A7	21	CBF1	1.21544	0.00108969
A7	22	CBF1	1.21353	-0.000949151
A7	23	CBF1	1.21426	-0.000338684
A7	24	CBF1	1.21464	-8.64402e-05
A7	25	CBF1	1.21516	0.000315292
A7	26	CBF1	1.21415	-0.000821253
A7	27	CBF1	1.21575	0.000654316
A7	28	CBF1	1.21609	0.000870797
A7	29	CBF1	1.21649	0.00114784
A7	30	CBF1	1.21397	-0.00150267
A7	31	CBF1	1.21477	-0.000820913
A7	32	CBF1	1.21533	-0.000383537
A7	33	CBF1	1.21655	0.000709728
A7	34	CBF1	1.21443	-0.00153832
A7	35	CBF1	1.21523	-0.000862769
A7	36	CBF1	1.21341	-0.00280576
A7	37	CBF1	1.21707	0.000726642
A7	38	CBF1	1.21703	0.000572024
A7	39	CBF1	1.21681	0.00022083
A7	40	CBF1	1.21458	-0.00213475
A8	1	CBF1	0.644578	-0.011509
A8	2	CBF1	0.64776	-0.00895914
A8	3	CBF1	0.650529	-0.00682229
A8	4	CBF1	0.651842	-0.00614087
A8	5	CBF1	0.654531	-0.00408484
A8	6	CBF1	0.65621	-0.00303763
A8	7	CBF1	0.658017	-0.00186303
A8	8	CBF1	0.658924	-0.00158776
A8	9	CBF1	0.661305	0.000161542
A8	10	CBF1	0.663433	0.00165681
A8	11	CBF1	0.663732	0.0013237
A8	12	CBF1	0.664905	0.00186475
A8	13	CBF1	0.666557	0.00288449
A8	14	CBF1	0.667064	0.00276
A8	15	CBF1	0.668782	0.00384614
A8	16	CBF1	0.669286	0.00371724
A8	17	CBF1	0.668256	0.0020553
A8	18	CBF1	0.669235	0.00240258
A8	19	CBF1	0.669877	0.00241226
A8	20	CBF1	0.671154	0.00305726
A8	21	CBF1	0.670208	0.00147896
A8	22	CBF1	0.672019	0.00265861
A8	23	CBF1	0.672887	0.00289437
A8	24	CBF1	0.672298	0.00167268
A8	25	CBF1	0.671977	0.000719921
A8	26	CBF1	0.673226	0.00133721
A8	27	CBF1	0.674131	0.00160962
A8	28	CBF1	0.673858	0.000705027
A8	29	CBF1	0.673921	0.000135766
A8	30	CBF1	0.673999	-0.000418594
A8	31	CBF1	0.67541	0.000360759
A8	32	CBF1	0.674396	-0.00128532
A8	33	CBF1	0.674924	-0.0013899
A8	34	CBF1	0.674447	-0.00249847
A8	35	CBF1	0.674985	-0.0025934
A8	36	CBF1	0.67648	-0.0017303
A8	37	CBF1	0.67625	-0.00259228
A8	38	CBF1	0.676211	-0.00326299
A8	39	CBF1	0.677699	-0.00240734
A8	40	CBF1	0.676523	-0.00421554
A9	1	CBF1	0.620292	-0.0127559
A9	2	CBF1	0.623863	-0.00974759
A9	3	CBF1	0.626587	-0.00758659
A9	4	CBF1	0.629251	-0.00548531
A9	5	CBF1	0.630929	-0.00436996
A9	6	CBF1	0.633005	-0.00285733
A9	7	CBF1	0.635642	-0.000783178
A9	8	CBF1	0.636408	-0.000579891
A9	9	CBF1	0.637517	-3.38785e-05
A9	10	CBF1	0.638541	0.000427257
A9	11	CBF1	0.641062	0.00238542
A9	12	CBF1	0.641437	0.00219812
A9	13	CBF1	0.64218	0.00237828
A9	14	CBF1	0.642434	0.00206891
A9	15	CBF1	0.643102	0.00217396
A9	16	CBF1	0.643613	0.00212226
A9	17	CBF1	0.644868	0.00281455
A9	18	CBF1	0.645486	0.00287007
A9	19	CBF1	0.645098	0.00191852
A9	20	CBF1	0.646581	0.00283921
A9	21	CBF1	0.646161	0.00185612
A9	22	CBF1	0.646313	0.00144488
A9	23	CBF1	0.647991	0.00255994
A9	24	CBF1	0.648962	0.00296803
A9	25	CBF1	0.648902	0.00234555
A9	26	CBF1	0.648687	0.00156715
A9	27	CBF1	0.648886	0.00120336
A9	28	CBF1	0.649625	0.00137988
A9	29	CBF1	0.648921	0.000112901
A9	30	CBF1	0.649606	0.000234707
A9	31	CBF1	0.650615	0.000681598
A9	32	CBF1	0.649079	-0.0014174
A9	33	CBF1	0.650518	-0.000541838
A9	34	CBF1	0.64945	-0.00217223
A9	35	CBF1	0.64894	-0.00324556
A9	36	CBF1	0.649902	-0.00284617
A9	37	CBF1	0.651724	-0.00158663
A9	38	CBF1	0.65207	-0.00180368
A9	39	CBF1	0.649196	-0.00524104
A9	40	CBF1	0.652507	-0.00249287
A10	1	CBF1	0.950076	-0.00816924
A10	2	CBF1	0.95439	-0.00441882
A10	3	CBF1	0.956438	-0.00293398
A10	4	CBF1	0.957137	-0.00279744
A10	5	CBF1	0.958772	-0.00172613
A10	6	CBF1	0.960092	-0.000969414
A10	7	CBF1	0.962454	0.000829611
A10	8	CBF1	0.963139	0.00095148
A10	9	CBF1	0.96423	0.00147926
A10	10	CBF1	0.965097	0.00178292
A10	11	CBF1	0.965767	0.00189013
A10	12	CBF1	0.965644	0.00120364
A10	13	CBF1	0.967407	0.00240358
A10	14	CBF1	0.967469	0.00190264
A10	15	CBF1	0.967434	0.00130412
A10	16	CBF1	0.967274	0.000580739
A10	17	CBF1	0.96682	-0.000435543
A10	18	CBF1	0.968694	0.000875022
A10	19	CBF1	0.967953	-0.000429508
A10	20	CBF1	0.968791	-0.000154574
A10	21	CBF1	0.968356	-0.00115291
A10	22	CBF1	0.96884	-0.00123161
A10	23	CBF1	0.9685	-0.00213542
A10	24	CBF1	0.969586	-0.00161182
A10	25	CBF1	0.972066	0.000304568
A10	26	CBF1	0.97193	-0.00039408
A10	27	CBF1	0.973352	0.000464741
A10	28	CBF1	0.979512	0.00606159
A10	29	CBF1	0.990057	0.0160431
A10	30	CBF1	1.00564	0.0310616
A10	31	CBF1	1.03725	0.0621091
A10	32	CBF1	1.09748	0.121777
A10	33	CBF1	1.19965	0.223384
A10	34	CBF1	1.35229	0.375458
A10	35	CBF1	1.53968	0.562287
A10	36	CBF1	1.72828	0.750322
A10	37	CBF1	1.90385	0.925335
A10	38	CBF1	2.05195	1.07287
A10	39	CBF1	2.18428	1.20464
A10	40	CBF1	2.2877	1.30749
A11	1	CBF1	0.766835	-0.00603908
A11	2	CBF1	0.768009	-0.00594472
A11	3	CBF1	0.770073	-0.00495916
A11	4	CBF1	0.773215	-0.0028963
A11	5	CBF1	0.774774	-0.00241666
A11	6	CBF1	0.777424	-0.000846021
A11	7	CBF1	0.779916	0.000567146
A11	8	CBF1	0.781472	0.00104375
A11	9	CBF1	0.785071	0.00356353
A11	10	CBF1	0.785069	0.00248248
A11	11	CBF1	0.784531	0.000864815
A11	12	CBF1	0.787369	0.00262434
A11	13	CBF1	0.787531	0.00170703
A11	14	CBF1	0.788537	0.00163372
A11	15	CBF1	0.789385	0.00140293
A11	16	CBF1	0.791088	0.00202657
A11	17	CBF1	0.791246	0.0011055
A11	18	CBF1	0.792336	0.00111677
A11	19	CBF1	0.792731	0.000431674
A11	20	CBF1	0.793787	0.000409085
A11	21	CBF1	0.793802	-0.000654738
A11	22	CBF1	0.792691	-0.00284497
A11	23	CBF1	0.793632	-0.00298373
A11	24	CBF1	0.794419	-0.00327585
A11	25	CBF1	0.796225	-0.00254831
A11	26	CBF1	0.799024	-0.000829018
A11	27	CBF1	0.804207	0.00327542
A11	28	CBF1	0.81336	0.0113486
A11	29	CBF1	0.830401	0.0273109
A11	30	CBF1	0.860468	0.0562982
A11	31	CBF1	0.918239	0.11299
A11	32	CBF1	1.021	0.214668
A11	33	CBF1	1.18922	0.381815
A11	34	CBF1	1.42887	0.620388
A11	35	CBF1	1.70606	0.896495
A11	36	CBF1	1.96068	1.15004
A11	37	CBF1	2.17641	1.36468
A11	38	CBF1	2.35028	1.53747
A11	39	CBF1	2.49593	1.68204
A11	40	CBF1	2.60598	1.79102
A12	1	CBF1	0.811002	-0.00369678
A12	2	CBF1	0.813119	-0.00308062
A12	3	CBF1	0.814029	-0.00367176
A12	4	CBF1	0.817692	-0.00150898
A12	5	CBF1	0.816581	-0.00412054
A12	6	CBF1	0.821209	-0.000993776
A12	7	CBF1	0.824324	0.000621054
A12	8	CBF1	0.82613	0.000926013
A12	9	CBF1	0.827992	0.00128718
A12	10	CBF1	0.829906	0.00170068
A12	11	CBF1	0.829512	-0.000194489
A12	12	CBF1	0.834294	0.00308754
A12	13	CBF1	0.83478	0.0020719
A12	14	CBF1	0.836376	0.00216771
A12	15	CBF1	0.838359	0.00265035
A12	16	CBF1	0.839365	0.00215541
A12	17	CBF1	0.839996	0.00128586
A12	18	CBF1	0.841179	0.000968073
A12	19	CBF1	0.842855	0.00114297
A12	20	CBF1	0.843338	0.000125664
A12	21	CBF1	0.843341	-0.00137218
A12	22	CBF1	0.846195	-1.93107e-05
A12	23	CBF1	0.84515	-0.00256506
A12	24	CBF1	0.84526	-0.0039552
A12	25	CBF1	0.847718	-0.00299817
A12	26	CBF1	0.853426	0.00120905
A12	27	CBF1	0.859586	0.00586866
A12	28	CBF1	0.87133	0.0161117
A12	29	CBF1	0.893406	0.0366874
A12	30	CBF1	0.933567	0.075347
A12	31	CBF1	1.01216	0.152442
A12	32	CBF1	1.14194	0.280723
A12	33	CBF1	1.33457	0.471845
A12	34	CBF1	1.57699	0.712769
A12	35	CBF1	1.81841	0.952687
A12	36	CBF1	2.02472	1.15749
A12	37	CBF1	2.1932	1.32448
A12	38	CBF1	2.33364	1.46342
A12	39	CBF1	2.44114	1.56941
A12	40	CBF1	2.53501	1.66178
B1	1	18S	1.49945	-0.000750925
B1	2	18S	1.49852	-0.0028991
B1	3	18S	1.50233	-0.000322424
B1	4	18S	1.50336	-0.000515213
B1	5	18S	1.50514	4.50429e-05
B1	6	18S	1.50982	0.00349183
B1	7	18S	1.509	0.00145309
B1	8	18S	1.51061	0.00183584
B1	9	18S	1.51176	0.00175463
B1	10	18S	1.51368	0.0024521
B1	11	18S	1.51309	0.000632696
B1	12	18S	1.51498	0.00130107
B1	13	18S	1.51316	-0.00174952
B1	14	18S	1.51532	-0.000811012
B1	15	18S	1.51461	-0.00274712
B1	16	18S	1.51716	-0.00142607
B1	17	18S	1.51456	-0.00524938
B1	18	18S	1.51771	-0.00332072
B1	19	18S	1.51653	-0.00573235
B1	20	18S	1.51924	-0.00423952
B1	21	18S	1.52294	-0.00177084
B1	22	18S	1.52353	-0.00240721
B1	23	18S	1.52809	0.000929073
B1	24	18S	1.53456	0.00617473
B1	25	18S	1.53983	0.0102213
B1	26	18S	1.54892	0.0180856
B1	27	18S	1.56669	0.0346267
B1	28	18S	1.58689	0.0536057
B1	29	18S	1.61319	0.0786752
B1	30	18S	1.64843	0.11269
B1	31	18S	1.69692	0.159955
B1	32	18S	1.7537	0.215506
B1	33	18S	1.82053	0.281117
B1	34	18S	1.90092	0.360278
B1	35	18S	1.98893	0.447064
B1	36	18S	2.08195	0.538857
B1	37	18S	2.17267	0.628354
B1	38	18S	2.26117	0.715628
B1	39	18S	2.33709	0.790319
B1	40	18S	2.40275	0.854754
B2	1	18S	0.7754	-0.00086017
B2	2	18S	0.77788	-0.000913718
B2	3	18S	0.781525	0.000198244
B2	4	18S	0.783459	-0.00040164
B2	5	18S	0.786248	-0.000146615
B2	6	18S	0.789841	0.000912358
B2	7	18S	0.792139	0.00067642
B2	8	18S	0.79204	-0.00195557
B2	9	18S	0.79665	0.000120501
B2	10	18S	0.799527	0.000463444
B2	11	18S	0.80173	0.000132853
B2	12	18S	0.808389	0.00425837
B2	13	18S	0.820162	0.0134974
B2	14	18S	0.845882	0.0366839
B2	15	18S	0.881274	0.0695419
B2	16	18S	0.946884	0.132618
B2	17	18S	1.0523	0.235495
B2	18	18S	1.19968	0.380343
B2	19	18S	1.37495	0.553084
B2	20	18S	1.56607	0.74167
B2	21	18S	1.758	0.931061
B2	22	18S	1.93641	1.10695
B2	23	18S	2.09827	1.26627
B2	24	18S	2.24178	1.40724
B2	25	18S	2.36357	1.5265
B2	26	18S	2.47308	1.63347
B2	27	18S	2.56763	1.72549
B2	28	18S	2.65181	1.80714
B2	29	18S	2.7182	1.871
B2	30	18S	2.78171	1.93197
B2	31	18S	2.83167	1.9794
B2	32	18S	2.89262	2.03781
B2	33	18S	2.92979	2.07245
B2	34	18S	2.96904	2.10916
B2	35	18S	3.00629	2.14388
B2	36	18S	3.03513	2.17019
B2	37	18S	3.07223	2.20476
B2	38	18S	3.09089	2.22088
B2	39	18S	3.12222	2.24968
B2	40	18S	3.1452	2.27013
B3	1	18S	0.677583	-0.00286331
B3	2	18S	0.68032	-0.00292743
B3	3	18S	0.687414	0.00136544
B3	4	18S	0.688786	-6.45187e-05
B3	5	18S	0.691892	0.000240796
B3	6	18S	0.694066	-0.000386463
B3	7	18S	0.696644	-0.000609782
B3	8	18S	0.699176	-0.000878937
B3	9	18S	0.700746	-0.00211089
B3	10	18S	0.704971	-0.000686612
B3	11	18S	0.71159	0.00313097
B3	12	18S	0.721071	0.00981022
B3	13	18S	0.738497	0.0244351
B3	14	18S	0.769939	0.0530751
B3	15	18S	0.826378	0.106714
B3	16	18S	0.922871	0.200405
B3	17	18S	1.07679	0.351519
B3	18	18S	1.28237	0.554297
B3	19	18S	1.51633	0.785456
B3	20	18S	1.74661	1.01294
B3	21	18S	1.96431	1.22784
B3	22	18S	2.15949	1.42021
B3	23	18S	2.32902	1.58694
B3	24	18S	2.47107	1.72619
B3	25	18S	2.58999	1.84231
B3	26	18S	2.69783	1.94735
B3	27	18S	2.78934	2.03606
B3	28	18S	2.86723	2.11115
B3	29	18S	2.92518	2.1663
B3	30	18S	2.98336	2.22167
B3	31	18S	3.03828	2.27379
B3	32	18S	3.08107	2.31378
B3	33	18S	3.12563	2.35554
B3	34	18S	3.15079	2.3779
B3	35	18S	3.18803	2.41234
B3	36	18S	3.21063	2.43214
B3	37	18S	3.24714	2.46585
B3	38	18S	3.27107	2.48697
B3	39	18S	3.2873	2.5004
B3	40	18S	3.31395	2.52425
B4	1	18S	0.692086	-0.000528682
B4	2	18S	0.696677	0.00159156
B4	3	18S	0.698748	0.00119237
B4	4	18S	0.700724	0.000697459
B4	5	18S	0.70258	8.35151e-05
B4	6	18S	0.704278	-0.000689394
B4	7	18S	0.707139	-0.000298284
B4	8	18S	0.709507	-0.000400819
B4	9	18S	0.709684	-0.00269436
B4	10	18S	0.714312	-0.000537285
B4	11	18S	0.716813	-0.000506902
B4	12	18S	0.722944	0.0031537
B4	13	18S	0.731236	0.00897557
B4	14	18S	0.746416	0.0216849
B4	15	18S	0.774948	0.0477465
B4	16	18S	0.826815	0.0971432
B4	17	18S	0.918446	0.186304
B4	18	18S	1.06996	0.335349
B4	19	18S	1.29415	0.557063
B4	20	18S	1.56467	0.82512
B4	21	18S	1.83177	1.08975
B4	22	18S	2.07746	1.33296
B4	23	18S	2.29111	1.54414
B4	24	18S	2.47452	1.72509
B4	25	18S	2.62555	1.87364
B4	26	18S	2.74216	1.98778
B4	27	18S	2.84962	2.09277
B4	28	18S	2.93486	2.17554
B4	29	18S	2.99023	2.22845
B4	30	18S	3.05932	2.29507
B4	31	18S	3.11348	2.34675
B4	32	18S	3.16238	2.39318
B4	33	18S	3.20652	2.43485
B4	34	18S	3.2369	2.46276
B4	35	18S	3.26675	2.49014
B4	36	18S	3.29137	2.51229
B4	37	18S	3.31701	2.53545
B4	38	18S	3.33912	2.5551
B4	39	18S	3.35487	2.56838
B4	40	18S	3.37208	2.58311
B5	1	18S	0.670478	-0.000902034
B5	2	18S	0.6734	-0.00017844
B5	3	18S	0.677643	0.00186689
B5	4	18S	0.678329	0.000354768
B5	5	18S	0.67862	-0.00155187
B5	6	18S	0.683031	0.000660585
B5	7	18S	0.683906	-0.000662347
B5	8	18S	0.685677	-0.00108924
B5	9	18S	0.68805	-0.000914132
B5	10	18S	0.690109	-0.00105349
B5	11	18S	0.693138	-0.000222434
B5	12	18S	0.69817	0.00261128
B5	13	18S	0.705538	0.00778126
B5	14	18S	0.721248	0.0212937
B5	15	18S	0.745887	0.0437347
B5	16	18S	0.793647	0.0892962
B5	17	18S	0.878959	0.172411
B5	18	18S	1.01923	0.31048
B5	19	18S	1.22694	0.515997
B5	20	18S	1.47719	0.764046
B5	21	18S	1.73306	1.01771
B5	22	18S	1.9492	1.23166
B5	23	18S	2.14786	1.42812
B5	24	18S	2.31224	1.59031
B5	25	18S	2.44558	1.72145
B5	26	18S	2.5556	1.82927
B5	27	18S	2.65349	1.92496
B5	28	18S	2.72407	1.99334
B5	29	18S	2.78718	2.05426
B5	30	18S	2.84604	2.11092
B5	31	18S	2.88898	2.15166
B5	32	18S	2.93547	2.19595
B5	33	18S	2.9684	2.22668
B5	34	18S	2.99938	2.25546
B5	35	18S	3.02968	2.28357
B5	36	18S	3.05259	2.30428
B5	37	18S	3.06708	2.31657
B5	38	18S	3.0904	2.33769
B5	39	18S	3.10184	2.34693
B5	40	18S	3.10802	2.35091
B6	1	18S	0.667509	-0.00124694
B6	2	18S	0.673149	0.00214637
B6	3	18S	0.67371	0.000460996
B6	4	18S	0.676889	0.00139394
B6	5	18S	0.677287	-0.000454213
B6	6	18S	0.679931	-5.72952e-05
B6	7	18S	0.681513	-0.000721162
B6	8	18S	0.683948	-0.000533039
B6	9	18S	0.685965	-0.000761732
B6	10	18S	0.687091	-0.00188211
B6	11	18S	0.69123	1.01682e-05
B6	12	18S	0.696011	0.00254445
B6	13	18S	0.705148	0.00943577
B6	14	18S	0.719735	0.0217757
B6	15	18S	0.749397	0.0491916
B6	16	18S	0.801935	0.0994832
B6	17	18S	0.896241	0.191543
B6	18	18S	1.05247	0.345522
B6	19	18S	1.2796	0.57041
B6	20	18S	1.55566	0.844223
B6	21	18S	1.82994	1.11625
B6	22	18S	2.06623	1.3503
B6	23	18S	2.27291	1.55473
B6	24	18S	2.4498	1.72938
B6	25	18S	2.58902	1.86636
B6	26	18S	2.70364	1.97873
B6	27	18S	2.80123	2.07406
B6	28	18S	2.88058	2.15117
B6	29	18S	2.94771	2.21606
B6	30	18S	3.00483	2.27093
B6	31	18S	3.05303	2.31688
B6	32	18S	3.09666	2.35827
B6	33	18S	3.1348	2.39416
B6	34	18S	3.1684	2.42551
B6	35	18S	3.19829	2.45316
B6	36	18S	3.21738	2.47
B6	37	18S	3.24456	2.49494
B6	38	18S	3.26336	2.51149
B6	39	18S	3.2733	2.51918
B6	40	18S	3.28143	2.52507
B7	1	CBF1	0.860864	-0.00767993
B7	2	CBF1	0.864498	-0.00449407
B7	3	CBF1	0.864948	-0.00449271
B7	4	CBF1	0.868252	-0.00163683
B7	5	CBF1	0.868395	-0.00194178
B7	6	CBF1	0.870961	0.000176083
B7	7	CBF1	0.871619	0.000385642
B7	8	CBF1	0.873631	0.00194948
B7	9	CBF1	0.872437	0.000307239
B7	10	CBF1	0.873915	0.00133785
B7	11	CBF1	0.87484	0.00181378
B7	12	CBF1	0.875101	0.00162721
B7	13	CBF1	0.876125	0.00220244
B7	14	CBF1	0.875936	0.00156568
B7	15	CBF1	0.876164	0.00134543
B7	16	CBF1	0.876849	0.00158246
B7	17	CBF1	0.875757	4.20873e-05
B7	18	CBF1	0.87636	0.000197346
B7	19	CBF1	0.875188	-0.00142326
B7	20	CBF1	0.876809	-0.000250009
B7	21	CBF1	0.876561	-0.000946561
B7	22	CBF1	0.87821	0.000254045
B7	23	CBF1	0.878373	-3.05789e-05
B7	24	CBF1	0.879086	0.000233756
B7	25	CBF1	0.877428	-0.00187274
B7	26	CBF1	0.876582	-0.00316623
B7	27	CBF1	0.87854	-0.00165658
B7	28	CBF1	0.880417	-0.00022745
B7	29	CBF1	0.883717	0.0026242
B7	30	CBF1	0.889082	0.0075405
B7	31	CBF1	0.902296	0.0203064
B7	32	CBF1	0.925364	0.0429266
B7	33	CBF1	0.969198	0.0863121
B7	34	CBF1	1.046	0.162663
B7	35	CBF1	1.16895	0.285171
B7	36	CBF1	1.34015	0.455917
B7	37	CBF1	1.52958	0.644901
B7	38	CBF1	1.71508	0.829949
B7	39	CBF1	1.87843	0.992854
B7	40	CBF1	2.02004	1.13401
B8	1	CBF1	0.685158	-0.00933848
B8	2	CBF1	0.688972	-0.0063428
B8	3	CBF1	0.692389	-0.00374378
B8	4	CBF1	0.695322	-0.00162887
B8	5	CBF1	0.696815	-0.00095324
B8	6	CBF1	0.697941	-0.000645666
B8	7	CBF1	0.699288	-0.00011672
B8	8	CBF1	0.700242	1.96108e-05
B8	9	CBF1	0.702402	0.00136174
B8	10	CBF1	0.703867	0.00200865
B8	11	CBF1	0.705005	0.00232844
B8	12	CBF1	0.705323	0.00182903
B8	13	CBF1	0.704574	0.000261619
B8	14	CBF1	0.70626	0.00112995
B8	15	CBF1	0.707054	0.00110565
B8	16	CBF1	0.707139	0.000372765
B8	17	CBF1	0.707684	9.93733e-05
B8	18	CBF1	0.709967	0.00156471
B8	19	CBF1	0.708838	-0.000382024
B8	20	CBF1	0.710994	0.000955161
B8	21	CBF1	0.710683	-0.000173022
B8	22	CBF1	0.711949	0.000274266
B8	23	CBF1	0.712029	-0.000463744
B8	24	CBF1	0.712014	-0.00129593
B8	25	CBF1	0.712048	-0.00208061
B8	26	CBF1	0.713575	-0.00137136
B8	27	CBF1	0.714519	-0.0012457
B8	28	CBF1	0.715136	-0.00144673
B8	29	CBF1	0.719637	0.00223643
B8	30	CBF1	0.725892	0.00767329
B8	31	CBF1	0.73977	0.020734
B8	32	CBF1	0.764915	0.0450602
B8	33	CBF1	0.811287	0.0906147
B8	34	CBF1	0.893383	0.171893
B8	35	CBF1	1.03352	0.311216
B8	36	CBF1	1.24564	0.522513
B8	37	CBF1	1.5027	0.778757
B8	38	CBF1	1.76423	1.03947
B8	39	CBF1	1.97883	1.25325
B8	40	CBF1	2.17186	1.44546
B9	1	CBF1	0.610066	-0.0081904
B9	2	CBF1	0.612901	-0.00615656
B9	3	CBF1	0.615078	-0.0047823
B9	4	CBF1	0.617259	-0.00340291
B9	5	CBF1	0.620271	-0.00119281
B9	6	CBF1	0.621407	-0.000858534
B9	7	CBF1	0.624042	0.000973907
B9	8	CBF1	0.624706	0.000836236
B9	9	CBF1	0.626107	0.0014354
B9	10	CBF1	0.627353	0.00187893
B9	11	CBF1	0.628791	0.00251558
B9	12	CBF1	0.627283	0.000204907
B9	13	CBF1	0.629659	0.00177938
B9	14	CBF1	0.631773	0.00309105
B9	15	CBF1	0.631537	0.00205377
B9	16	CBF1	0.633177	0.00289153
B9	17	CBF1	0.631563	0.000476067
B9	18	CBF1	0.632452	0.000562748
B9	19	CBF1	0.632468	-0.000222945
B9	20	CBF1	0.633613	0.000119976
B9	21	CBF1	0.633185	-0.00111025
B9	22	CBF1	0.634616	-0.000480986
B9	23	CBF1	0.634451	-0.00144788
B9	24	CBF1	0.635289	-0.00141204
B9	25	CBF1	0.63563	-0.00187318
B9	26	CBF1	0.63624	-0.00206533
B9	27	CBF1	0.637213	-0.00189401
B9	28	CBF1	0.639078	-0.000831129
B9	29	CBF1	0.643466	0.00275482
B9	30	CBF1	0.649622	0.00810888
B9	31	CBF1	0.66276	0.0204454
B9	32	CBF1	0.689739	0.046622
B9	33	CBF1	0.737055	0.0931366
B9	34	CBF1	0.82682	0.182099
B9	35	CBF1	0.975549	0.330027
B9	36	CBF1	1.20222	0.555892
B9	37	CBF1	1.48803	0.840902
B9	38	CBF1	1.77472	1.12679
B9	39	CBF1	2.01811	1.36938
B9	40	CBF1	2.21378	1.56425
B10	1	CBF1	0.737994	-0.00756652
B10	2	CBF1	0.741104	-0.00555524
B10	3	CBF1	0.742908	-0.00484954
B10	4	CBF1	0.74615	-0.00270558
B10	5	CBF1	0.746719	-0.00323447
B10	6	CBF1	0.749647	-0.00140421
B10	7	CBF1	0.751689	-0.000461219
B10	8	CBF1	0.75272	-0.000527816
B10	9	CBF1	0.755767	0.00142106
B10	10	CBF1	0.757052	0.00160748
B10	11	CBF1	0.759402	0.00285928
B10	12	CBF1	0.759804	0.00216326
B10	13	CBF1	0.759863	0.00112379
B10	14	CBF1	0.762751	0.00291382
B10	15	CBF1	0.762925	0.00199011
B10	16	CBF1	0.764433	0.00239993
B10	17	CBF1	0.765325	0.0021935
B10	18	CBF1	0.767395	0.00316492
B10	19	CBF1	0.767285	0.00195695
B10	20	CBF1	0.768779	0.00235235
B10	21	CBF1	0.768359	0.000834204
B10	22	CBF1	0.767078	-0.00154499
B10	23	CBF1	0.768877	-0.000843406
B10	24	CBF1	0.769236	-0.001583
B10	25	CBF1	0.769486	-0.00243083
B10	26	CBF1	0.770477	-0.00253862
B10	27	CBF1	0.771297	-0.00281592
B10	28	CBF1	0.772547	-0.0026643
B10	29	CBF1	0.774736	-0.00157379
B10	30	CBF1	0.779605	0.00219701
B10	31	CBF1	0.786354	0.00784758
B10	32	CBF1	0.801702	0.022098
B10	33	CBF1	0.829982	0.0492794
B10	34	CBF1	0.882322	0.100521
B10	35	CBF1	0.974791	0.191892
B10	36	CBF1	1.13123	0.34723
B10	37	CBF1	1.36262	0.577522
B10	38	CBF1	1.64922	0.863024
B10	39	CBF1	1.92298	1.13569
B10	40	CBF1	2.14855	1.36016
B11	1	CBF1	0.673518	-0.00360477
B11	2	CBF1	0.676408	-0.00192768
B11	3	CBF1	0.676082	-0.00346657
B11	4	CBF1	0.67927	-0.00149217
B11	5	CBF1	0.679626	-0.00234972
B11	6	CBF1	0.681191	-0.00199759
B11	7	CBF1	0.685035	0.00063353
B11	8	CBF1	0.684827	-0.000788172
B11	9	CBF1	0.686278	-0.000550838
B11	10	CBF1	0.688162	0.00012006
B11	11	CBF1	0.691744	0.00248933
B11	12	CBF1	0.692509	0.00204038
B11	13	CBF1	0.694178	0.00249634
B11	14	CBF1	0.696019	0.00312379
B11	15	CBF1	0.696889	0.00278099
B11	16	CBF1	0.696885	0.00156355
B11	17	CBF1	0.69757	0.0010355
B11	18	CBF1	0.700076	0.00232802
B11	19	CBF1	0.698894	-6.75045e-05
B11	20	CBF1	0.701447	0.00127234
B11	21	CBF1	0.701286	-0.000101384
B11	22	CBF1	0.703335	0.000734023
B11	23	CBF1	0.70238	-0.00143399
B11	24	CBF1	0.703894	-0.001133
B11	25	CBF1	0.704239	-0.0020021
B11	26	CBF1	0.70593	-0.00152415
B11	27	CBF1	0.705777	-0.00289065
B11	28	CBF1	0.707142	-0.00273897
B11	29	CBF1	0.710815	-0.000278684
B11	30	CBF1	0.714505	0.00219764
B11	31	CBF1	0.723768	0.0102479
B11	32	CBF1	0.739545	0.0248113
B11	33	CBF1	0.770782	0.0548355
B11	34	CBF1	0.825805	0.108644
B11	35	CBF1	0.924883	0.206509
B11	36	CBF1	1.09035	0.370762
B11	37	CBF1	1.32451	0.603713
B11	38	CBF1	1.60717	0.885158
B11	39	CBF1	1.866	1.14277
B11	40	CBF1	2.08591	1.36147
B12	1	CBF1	0.696041	-0.00935587
B12	2	CBF1	0.69905	-0.00751189
B12	3	CBF1	0.701408	-0.00631962
B12	4	CBF1	0.704109	-0.00478402
B12	5	CBF1	0.707147	-0.00291178
B12	6	CBF1	0.709644	-0.00157968
B12	7	CBF1	0.713033	0.000643993
B12	8	CBF1	0.713485	-6.94159e-05
B12	9	CBF1	0.717374	0.00265398
B12	10	CBF1	0.719386	0.00350126
B12	11	CBF1	0.719164	0.00211342
B12	12	CBF1	0.720709	0.00249287
B12	13	CBF1	0.722089	0.0027075
B12	14	CBF1	0.722807	0.00226041
B12	15	CBF1	0.724159	0.00244697
B12	16	CBF1	0.724286	0.00140889
B12	17	CBF1	0.725494	0.00145205
B12	18	CBF1	0.726597	0.00138934
B12	19	CBF1	0.726222	-0.000150664
B12	20	CBF1	0.728828	0.00128986
B12	21	CBF1	0.730882	0.00217803
B12	22	CBF1	0.73085	0.000981346
B12	23	CBF1	0.731203	0.000168696
B12	24	CBF1	0.731866	-0.000333355
B12	25	CBF1	0.731554	-0.00181066
B12	26	CBF1	0.732514	-0.002016
B12	27	CBF1	0.73442	-0.00127553
B12	28	CBF1	0.736249	-0.000612188
B12	29	CBF1	0.733581	-0.00444489
B12	30	CBF1	0.736748	-0.00244408
B12	31	CBF1	0.738701	-0.0016564
B12	32	CBF1	0.744242	0.00271965
B12	33	CBF1	0.752746	0.0100585
B12	34	CBF1	0.768129	0.0242757
B12	35	CBF1	0.797649	0.0526308
B12	36	CBF1	0.851542	0.105359
B12	37	CBF1	0.952242	0.204893
B12	38	CBF1	1.11009	0.361575
B12	39	CBF1	1.34164	0.591961
B12	40	CBF1	1.60838	0.857535
C1	1	18S	0.810319	0.00533182
C1	2	18S	0.80962	0.00102652
C1	3	18S	0.812487	0.000286954
C1	4	18S	0.815956	0.000149511
C1	5	18S	0.81864	-0.000772687
C1	6	18S	0.823034	1.49931e-05
C1	7	18S	0.82688	0.000255265
C1	8	18S	0.830297	6.59653e-05
C1	9	18S	0.839476	0.00563865
C1	10	18S	0.850475	0.0130314
C1	11	18S	0.874426	0.0333757
C1	12	18S	0.914187	0.06953
C1	13	18S	0.987733	0.13947
C1	14	18S	1.10395	0.252081
C1	15	18S	1.27433	0.418851
C1	16	18S	1.48477	0.625683
C1	17	18S	1.71639	0.853706
C1	18	18S	1.93377	1.06747
C1	19	18S	2.14166	1.27176
C1	20	18S	2.32581	1.4523
C1	21	18S	2.48367	1.60656
C1	22	18S	2.62004	1.73932
C1	23	18S	2.73873	1.8544
C1	24	18S	2.83959	1.95166
C1	25	18S	2.92311	2.03157
C1	26	18S	2.9987	2.10355
C1	27	18S	3.05651	2.15776
C1	28	18S	3.12077	2.21842
C1	29	18S	3.16013	2.25417
C1	30	18S	3.21285	2.30328
C1	31	18S	3.24068	2.3275
C1	32	18S	3.27301	2.35623
C1	33	18S	3.30379	2.3834
C1	34	18S	3.3271	2.40311
C1	35	18S	3.35029	2.42268
C1	36	18S	3.38209	2.45089
C1	37	18S	3.39521	2.4604
C1	38	18S	3.41724	2.47882
C1	39	18S	3.43604	2.49402
C1	40	18S	3.45072	2.50509
C2	1	18S	0.664608	0.00447129
C2	2	18S	0.667625	0.00318106
C2	3	18S	0.669466	0.000714058
C2	4	18S	0.674219	0.00115988
C2	5	18S	0.676596	-0.000770626
C2	6	18S	0.679484	-0.00219097
C2	7	18S	0.684466	-0.00151597
C2	8	18S	0.692894	0.00260364
C2	9	18S	0.701495	0.00689777
C2	10	18S	0.722141	0.0232353
C2	11	18S	0.754636	0.0514231
C2	12	18S	0.816289	0.108768
C2	13	18S	0.920191	0.208363
C2	14	18S	1.08728	0.371142
C2	15	18S	1.32366	0.603219
C2	16	18S	1.60188	0.877127
C2	17	18S	1.88309	1.15403
C2	18	18S	2.13823	1.40486
C2	19	18S	2.37958	1.64191
C2	20	18S	2.58346	1.84148
C2	21	18S	2.74544	1.99915
C2	22	18S	2.88025	2.12966
C2	23	18S	2.99738	2.24247
C2	24	18S	3.09395	2.33474
C2	25	18S	3.16433	2.40081
C2	26	18S	3.23018	2.46235
C2	27	18S	3.29217	2.52003
C2	28	18S	3.33837	2.56192
C2	29	18S	3.38465	2.60389
C2	30	18S	3.4111	2.62604
C2	31	18S	3.45606	2.6667
C2	32	18S	3.48071	2.68703
C2	33	18S	3.50499	2.70701
C2	34	18S	3.52095	2.71866
C2	35	18S	3.55308	2.74648
C2	36	18S	3.56347	2.75257
C2	37	18S	3.58478	2.76957
C2	38	18S	3.60087	2.78135
C2	39	18S	3.62059	2.79677
C2	40	18S	3.63328	2.80514
C3	1	18S	0.634363	2.34127e-05
C3	2	18S	0.637975	0.000267047
C3	3	18S	0.641927	0.00085144
C3	4	18S	0.644962	0.00051828
C3	5	18S	0.646192	-0.00161953
C3	6	18S	0.649458	-0.00172154
C3	7	18S	0.656519	0.00197135
C3	8	18S	0.660371	0.00245597
C3	9	18S	0.671673	0.0103896
C3	10	18S	0.691786	0.0271344
C3	11	18S	0.727758	0.0597387
C3	12	18S	0.791951	0.120564
C3	13	18S	0.901137	0.226382
C3	14	18S	1.07803	0.39991
C3	15	18S	1.32653	0.645042
C3	16	18S	1.61576	0.9309
C3	17	18S	1.90413	1.21591
C3	18	18S	2.1676	1.47601
C3	19	18S	2.40694	1.71198
C3	20	18S	2.60047	1.90214
C3	21	18S	2.7651	2.06341
C3	22	18S	2.89728	2.19221
C3	23	18S	3.00942	2.30099
C3	24	18S	3.10358	2.39178
C3	25	18S	3.18201	2.46684
C3	26	18S	3.24382	2.52528
C3	27	18S	3.30826	2.58635
C3	28	18S	3.35152	2.62625
C3	29	18S	3.39177	2.66312
C3	30	18S	3.43129	2.69928
C3	31	18S	3.46288	2.7275
C3	32	18S	3.48727	2.74852
C3	33	18S	3.50792	2.76581
C3	34	18S	3.52917	2.78369
C3	35	18S	3.55232	2.80347
C3	36	18S	3.57061	2.8184
C3	37	18S	3.59292	2.83733
C3	38	18S	3.6102	2.85125
C3	39	18S	3.62378	2.86146
C3	40	18S	3.63397	2.86828
C4	1	18S	0.690053	-0.0047654
C4	2	18S	0.694171	-0.00266718
C4	3	18S	0.697689	-0.00116907
C4	4	18S	0.700662	-0.000216568
C4	5	18S	0.703959	0.00105994
C4	6	18S	0.706257	0.00133795
C4	7	18S	0.706908	-3.12734e-05
C4	8	18S	0.709191	0.000231598
C4	9	18S	0.712198	0.00121837
C4	10	18S	0.71134	-0.00166005
C4	11	18S	0.714844	-0.000176293
C4	12	18S	0.716703	-0.000337092
C4	13	18S	0.718399	-0.000661625
C4	14	18S	0.720058	-0.00102293
C4	15	18S	0.72198	-0.00112121
C4	16	18S	0.72767	0.00254825
C4	17	18S	0.735413	0.0082718
C4	18	18S	0.74726	0.0180979
C4	19	18S	0.765077	0.0338946
C4	20	18S	0.804052	0.0708499
C4	21	18S	0.873309	0.138087
C4	22	18S	0.988427	0.251184
C4	23	18S	1.16841	0.42915
C4	24	18S	1.39972	0.658435
C4	25	18S	1.65265	0.909343
C4	26	18S	1.89635	1.15102
C4	27	18S	2.12529	1.37795
C4	28	18S	2.32033	1.57096
C4	29	18S	2.47536	1.72398
C4	30	18S	2.61278	1.85937
C4	31	18S	2.72773	1.97231
C4	32	18S	2.81889	2.06145
C4	33	18S	2.89619	2.13673
C4	34	18S	2.96132	2.19984
C4	35	18S	3.02666	2.26316
C4	36	18S	3.0774	2.31187
C4	37	18S	3.13031	2.36276
C4	38	18S	3.16785	2.39828
C4	39	18S	3.19134	2.41975
C4	40	18S	3.22117	2.44756
C5	1	18S	0.732514	-0.00404043
C5	2	18S	0.738416	-0.000706436
C5	3	18S	0.741039	-0.000652129
C5	4	18S	0.744013	-0.000246334
C5	5	18S	0.747313	0.000485797
C5	6	18S	0.749893	0.000498321
C5	7	18S	0.752097	0.000133905
C5	8	18S	0.754937	0.000405412
C5	9	18S	0.757701	0.000601637
C5	10	18S	0.759415	-0.00025255
C5	11	18S	0.762139	-9.6319e-05
C5	12	18S	0.765174	0.000370214
C5	13	18S	0.76601	-0.00136141
C5	14	18S	0.768418	-0.00152174
C5	15	18S	0.772598	9.05698e-05
C5	16	18S	0.77662	0.00154463
C5	17	18S	0.7842	0.00655596
C5	18	18S	0.79779	0.0175781
C5	19	18S	0.820117	0.0373371
C5	20	18S	0.863746	0.0783982
C5	21	18S	0.942461	0.154545
C5	22	18S	1.0731	0.282614
C5	23	18S	1.273	0.479946
C5	24	18S	1.53185	0.736226
C5	25	18S	1.81413	1.01594
C5	26	18S	2.06805	1.26729
C5	27	18S	2.29725	1.49393
C5	28	18S	2.49373	1.68784
C5	29	18S	2.65246	1.844
C5	30	18S	2.78746	1.97643
C5	31	18S	2.90356	2.08997
C5	32	18S	2.99549	2.17933
C5	33	18S	3.07387	2.25513
C5	34	18S	3.1405	2.3192
C5	35	18S	3.19775	2.37388
C5	36	18S	3.25029	2.42386
C5	37	18S	3.29198	2.46298
C5	38	18S	3.33398	2.50241
C5	39	18S	3.35947	2.52533
C5	40	18S	3.38865	2.55194
C6	1	18S	0.665404	-0.00191556
C6	2	18S	0.668046	-0.00133771
C6	3	18S	0.671602	0.000152925
C6	4	18S	0.67404	0.000526869
C6	5	18S	0.675272	-0.000306598
C6	6	18S	0.677535	-0.000107354
C6	7	18S	0.680181	0.000473656
C6	8	18S	0.682151	0.000378512
C6	9	18S	0.682905	-0.000931553
C6	10	18S	0.68596	5.80473e-05
C6	11	18S	0.687376	-0.000590586
C6	12	18S	0.690133	0.000101767
C6	13	18S	0.692151	5.54983e-05
C6	14	18S	0.693236	-0.000924477
C6	15	18S	0.69547	-0.00075444
C6	16	18S	0.700157	0.00186773
C6	17	18S	0.708096	0.00774223
C6	18	18S	0.72172	0.0193013
C6	19	18S	0.745529	0.041046
C6	20	18S	0.7922	0.085652
C6	21	18S	0.872417	0.163805
C6	22	18S	1.00996	0.299286
C6	23	18S	1.22088	0.508134
C6	24	18S	1.48917	0.774359
C6	25	18S	1.7807	1.06383
C6	26	18S	2.03735	1.31841
C6	27	18S	2.26837	1.54737
C6	28	18S	2.46734	1.74427
C6	29	18S	2.62833	1.9032
C6	30	18S	2.76355	2.03636
C6	31	18S	2.87495	2.14569
C6	32	18S	2.97473	2.2434
C6	33	18S	3.05225	2.31886
C6	34	18S	3.11739	2.38194
C6	35	18S	3.18017	2.44265
C6	36	18S	3.2317	2.49212
C6	37	18S	3.2735	2.53186
C6	38	18S	3.31306	2.56935
C6	39	18S	3.34408	2.59831
C6	40	18S	3.37811	2.63027
C7	1	CBF1	0.606202	-0.00955465
C7	2	CBF1	0.611694	-0.00567079
C7	3	CBF1	0.614689	-0.00428496
C7	4	CBF1	0.617521	-0.00306143
C7	5	CBF1	0.62055	-0.00164133
C7	6	CBF1	0.623529	-0.000271241
C7	7	CBF1	0.625416	6.77549e-06
C7	8	CBF1	0.629009	0.00199068
C7	9	CBF1	0.629812	0.00118419
C7	10	CBF1	0.632752	0.00251601
C7	11	CBF1	0.633702	0.00185728
C7	12	CBF1	0.636217	0.00276329
C7	13	CBF1	0.636274	0.00121151
C7	14	CBF1	0.638918	0.00224597
C7	15	CBF1	0.639863	0.00158235
C7	16	CBF1	0.641104	0.00121437
C7	17	CBF1	0.641865	0.000366456
C7	18	CBF1	0.643343	0.000235525
C7	19	CBF1	0.644481	-0.000235212
C7	20	CBF1	0.646644	0.000318834
C7	21	CBF1	0.646148	-0.00178644
C7	22	CBF1	0.646586	-0.0029567
C7	23	CBF1	0.648516	-0.00263529
C7	24	CBF1	0.650225	-0.00253615
C7	25	CBF1	0.653312	-0.00105763
C7	26	CBF1	0.658952	0.00297315
C7	27	CBF1	0.666736	0.00914917
C7	28	CBF1	0.68215	0.0229542
C7	29	CBF1	0.710639	0.0498337
C7	30	CBF1	0.765429	0.103015
C7	31	CBF1	0.862174	0.198152
C7	32	CBF1	1.02469	0.359059
C7	33	CBF1	1.25739	0.590148
C7	34	CBF1	1.53806	0.869206
C7	35	CBF1	1.80721	1.13675
C7	36	CBF1	2.02605	1.35398
C7	37	CBF1	2.19525	1.52157
C7	38	CBF1	2.33121	1.65592
C7	39	CBF1	2.43418	1.75728
C7	40	CBF1	2.52324	1.84474
C8	1	CBF1	0.61907	-0.00276711
C8	2	CBF1	0.621194	-0.00195634
C8	3	CBF1	0.621787	-0.00267573
C8	4	CBF1	0.623486	-0.0022897
C8	5	CBF1	0.626766	-0.000322177
C8	6	CBF1	0.627318	-0.00108246
C8	7	CBF1	0.629697	-1.65196e-05
C8	8	CBF1	0.631537	0.000511491
C8	9	CBF1	0.63337	0.00103181
C8	10	CBF1	0.635901	0.00224987
C8	11	CBF1	0.636431	0.00146705
C8	12	CBF1	0.637164	0.000887308
C8	13	CBF1	0.638892	0.00130273
C8	14	CBF1	0.640428	0.00152622
C8	15	CBF1	0.642281	0.00206615
C8	16	CBF1	0.641792	0.000264569
C8	17	CBF1	0.643937	0.00109698
C8	18	CBF1	0.643866	-0.000285875
C8	19	CBF1	0.645323	-0.000142493
C8	20	CBF1	0.646776	-1.79404e-06
C8	21	CBF1	0.647012	-0.0010784
C8	22	CBF1	0.647963	-0.00143993
C8	23	CBF1	0.647487	-0.00322881
C8	24	CBF1	0.651012	-0.00101643
C8	25	CBF1	0.652481	-0.000859403
C8	26	CBF1	0.656689	0.00203557
C8	27	CBF1	0.660978	0.00501172
C8	28	CBF1	0.67162	0.0143415
C8	29	CBF1	0.693835	0.0352433
C8	30	CBF1	0.732871	0.0729665
C8	31	CBF1	0.805491	0.144275
C8	32	CBF1	0.931627	0.269097
C8	33	CBF1	1.13084	0.466999
C8	34	CBF1	1.40092	0.735764
C8	35	CBF1	1.70836	1.0419
C8	36	CBF1	1.98272	1.31494
C8	37	CBF1	2.19936	1.53027
C8	38	CBF1	2.37625	1.70585
C8	39	CBF1	2.51322	1.84151
C8	40	CBF1	2.62403	1.951
C9	1	CBF1	0.567975	-0.0051511
C9	2	CBF1	0.571802	-0.00252259
C9	3	CBF1	0.57197	-0.00355232
C9	4	CBF1	0.575523	-0.00119823
C9	5	CBF1	0.577379	-0.000540318
C9	6	CBF1	0.578103	-0.00101483
C9	7	CBF1	0.580546	0.000230371
C9	8	CBF1	0.581226	-0.00028807
C9	9	CBF1	0.583588	0.000876128
C9	10	CBF1	0.585663	0.00175285
C9	11	CBF1	0.587357	0.00224787
C9	12	CBF1	0.587472	0.00116456
C9	13	CBF1	0.58924	0.00173474
C9	14	CBF1	0.590742	0.00203777
C9	15	CBF1	0.590954	0.00105238
C9	16	CBF1	0.591247	0.000146273
C9	17	CBF1	0.593906	0.00160689
C9	18	CBF1	0.594011	0.000514273
C9	19	CBF1	0.594879	0.000184123
C9	20	CBF1	0.59556	-0.000333066
C9	21	CBF1	0.594995	-0.00209635
C9	22	CBF1	0.59589	-0.00240039
C9	23	CBF1	0.597614	-0.0018748
C9	24	CBF1	0.598286	-0.00240039
C9	25	CBF1	0.602038	0.000152536
C9	26	CBF1	0.605081	0.00199802
C9	27	CBF1	0.614459	0.0101771
C9	28	CBF1	0.62924	0.0237603
C9	29	CBF1	0.655231	0.0485527
C9	30	CBF1	0.707355	0.0994782
C9	31	CBF1	0.803005	0.19393
C9	32	CBF1	0.961391	0.351118
C9	33	CBF1	1.20225	0.590778
C9	34	CBF1	1.50725	0.894579
C9	35	CBF1	1.82103	1.20717
C9	36	CBF1	2.08523	1.47016
C9	37	CBF1	2.29821	1.68195
C9	38	CBF1	2.47271	1.85525
C9	39	CBF1	2.60505	1.98639
C9	40	CBF1	2.71664	2.09678
C10	1	CBF1	1.11332	-0.00606219
C10	2	CBF1	1.11615	-0.00317387
C10	3	CBF1	1.11764	-0.00163345
C10	4	CBF1	1.11747	-0.00174945
C10	5	CBF1	1.11781	-0.00135618
C10	6	CBF1	1.11791	-0.00120777
C10	7	CBF1	1.11786	-0.00120622
C10	8	CBF1	1.11962	0.000606231
C10	9	CBF1	1.11924	0.000284601
C10	10	CBF1	1.11871	-0.000197724
C10	11	CBF1	1.1194	0.000540655
C10	12	CBF1	1.11911	0.000306643
C10	13	CBF1	1.11868	-7.0658e-05
C10	14	CBF1	1.12154	0.00284389
C10	15	CBF1	1.11896	0.000316049
C10	16	CBF1	1.12025	0.00165763
C10	17	CBF1	1.11973	0.00119628
C10	18	CBF1	1.1197	0.00121893
C10	19	CBF1	1.11921	0.000772129
C10	20	CBF1	1.11828	-0.000101321
C10	21	CBF1	1.11856	0.000233057
C10	22	CBF1	1.1179	-0.000372172
C10	23	CBF1	1.12034	0.00211787
C10	24	CBF1	1.11828	0.000111572
C10	25	CBF1	1.11772	-0.000393045
C10	26	CBF1	1.11827	0.000206813
C10	27	CBF1	1.11762	-0.000388999
C10	28	CBF1	1.11901	0.00105271
C10	29	CBF1	1.11729	-0.000611332
C10	30	CBF1	1.11798	0.000130981
C10	31	CBF1	1.11749	-0.000308071
C10	32	CBF1	1.11705	-0.000697531
C10	33	CBF1	1.11871	0.0010155
C10	34	CBF1	1.11672	-0.000920699
C10	35	CBF1	1.11634	-0.00125222
C10	36	CBF1	1.11554	-0.00199562
C10	37	CBF1	1.11912	0.00163311
C10	38	CBF1	1.11761	0.000178396
C10	39	CBF1	1.11542	-0.00196058
C10	40	CBF1	1.11704	-0.0002876
C11	1	CBF1	0.694342	-0.0118468
C11	2	CBF1	0.696796	-0.0100525
C11	3	CBF1	0.700195	-0.00731282
C11	4	CBF1	0.702585	-0.00558221
C11	5	CBF1	0.704217	-0.0046096
C11	6	CBF1	0.705827	-0.00365891
C11	7	CBF1	0.708453	-0.00169275
C11	8	CBF1	0.710432	-0.000373587
C11	9	CBF1	0.711555	9.08416e-05
C11	10	CBF1	0.711647	-0.000477202
C11	11	CBF1	0.714564	0.00178013
C11	12	CBF1	0.715579	0.00213614
C11	13	CBF1	0.715806	0.00170424
C11	14	CBF1	0.717535	0.00277329
C11	15	CBF1	0.717994	0.00257248
C11	16	CBF1	0.718784	0.00270365
C11	17	CBF1	0.720922	0.00418202
C11	18	CBF1	0.721388	0.00398859
C11	19	CBF1	0.720625	0.00256647
C11	20	CBF1	0.721336	0.00261766
C11	21	CBF1	0.722966	0.00358795
C11	22	CBF1	0.722019	0.0019816
C11	23	CBF1	0.723917	0.00322089
C11	24	CBF1	0.723647	0.00229068
C11	25	CBF1	0.723153	0.00113816
C11	26	CBF1	0.723145	0.000469979
C11	27	CBF1	0.724534	0.0012003
C11	28	CBF1	0.724729	0.000735198
C11	29	CBF1	0.725416	0.000762725
C11	30	CBF1	0.72585	0.000538064
C11	31	CBF1	0.725395	-0.000576673
C11	32	CBF1	0.726255	-0.000375936
C11	33	CBF1	0.725744	-0.00154688
C11	34	CBF1	0.726956	-0.000993581
C11	35	CBF1	0.726071	-0.00253866
C11	36	CBF1	0.72631	-0.00295847
C11	37	CBF1	0.726852	-0.00307674
C11	38	CBF1	0.727153	-0.00343467
C11	39	CBF1	0.727415	-0.00383237
C11	40	CBF1	0.727675	-0.00423149
C12	1	CBF1	0.73197	-0.0127151
C12	2	CBF1	0.734608	-0.0106405
C12	3	CBF1	0.737829	-0.0079835
C12	4	CBF1	0.739963	-0.00641329
C12	5	CBF1	0.741653	-0.00528588
C12	6	CBF1	0.744785	-0.00271789
C12	7	CBF1	0.74672	-0.00134604
C12	8	CBF1	0.74907	0.000439999
C12	9	CBF1	0.749855	0.000661178
C12	10	CBF1	0.749794	3.74028e-05
C12	11	CBF1	0.75406	0.00373991
C12	12	CBF1	0.753213	0.00232894
C12	13	CBF1	0.753296	0.00184869
C12	14	CBF1	0.753644	0.00163279
C12	15	CBF1	0.754844	0.00226959
C12	16	CBF1	0.755494	0.00235618
C12	17	CBF1	0.756607	0.00290543
C12	18	CBF1	0.756688	0.00242268
C12	19	CBF1	0.756421	0.00159249
C12	20	CBF1	0.759776	0.0043843
C12	21	CBF1	0.758702	0.00274629
C12	22	CBF1	0.759546	0.00302654
C12	23	CBF1	0.76007	0.00298748
C12	24	CBF1	0.759745	0.00209889
C12	25	CBF1	0.760732	0.00252224
C12	26	CBF1	0.760002	0.00122839
C12	27	CBF1	0.760289	0.000952828
C12	28	CBF1	0.760875	0.000974689
C12	29	CBF1	0.760202	-0.000261226
C12	30	CBF1	0.760625	-0.000402085
C12	31	CBF1	0.760472	-0.00111837
C12	32	CBF1	0.761398	-0.000756639
C12	33	CBF1	0.760667	-0.00205079
C12	34	CBF1	0.763236	-4.55223e-05
C12	35	CBF1	0.761259	-0.002586
C12	36	CBF1	0.762266	-0.00214268
C12	37	CBF1	0.760971	-0.00400039
C12	38	CBF1	0.764413	-0.00112281
C12	39	CBF1	0.761175	-0.00492381
C12	40	CBF1	0.762811	-0.00385124
D1	1	18S	0.856983	0.00220116
D1	2	18S	0.857487	-0.000151656
D1	3	18S	0.860985	0.000488694
D1	4	18S	0.862866	-0.000487137
D1	5	18S	0.866389	0.000179557
D1	6	18S	0.868663	-0.000403837
D1	7	18S	0.873099	0.00117546
D1	8	18S	0.873368	-0.00141291
D1	9	18S	0.877157	-0.000481036
D1	10	18S	0.881436	0.000941207
D1	11	18S	0.888372	0.00502057
D1	12	18S	0.898455	0.0122469
D1	13	18S	0.916864	0.0277988
D1	14	18S	0.949188	0.0572653
D1	15	18S	1.00581	0.111026
D1	16	18S	1.09688	0.199244
D1	17	18S	1.22656	0.326065
D1	18	18S	1.38664	0.483286
D1	19	18S	1.57638	0.67017
D1	20	18S	1.77555	0.866484
D1	21	18S	1.9642	1.05228
D1	22	18S	2.13895	1.22417
D1	23	18S	2.3	1.38237
D1	24	18S	2.44199	1.5215
D1	25	18S	2.5596	1.63625
D1	26	18S	2.66758	1.74138
D1	27	18S	2.76892	1.83985
D1	28	18S	2.84557	1.91365
D1	29	18S	2.91157	1.97679
D1	30	18S	2.97758	2.03994
D1	31	18S	3.03593	2.09544
D1	32	18S	3.08143	2.13808
D1	33	18S	3.12727	2.18107
D1	34	18S	3.16302	2.21396
D1	35	18S	3.19972	2.2478
D1	36	18S	3.23184	2.27706
D1	37	18S	3.26705	2.30941
D1	38	18S	3.29514	2.33465
D1	39	18S	3.31299	2.34964
D1	40	18S	3.343	2.3768
D2	1	18S	0.692877	0.00340623
D2	2	18S	0.693918	0.00120947
D2	3	18S	0.696295	0.000350003
D2	4	18S	0.700832	0.00164929
D2	5	18S	0.702072	-0.000348146
D2	6	18S	0.703935	-0.00172254
D2	7	18S	0.707055	-0.00184023
D2	8	18S	0.712026	-0.000105824
D2	9	18S	0.717387	0.00201744
D2	10	18S	0.724083	0.00547585
D2	11	18S	0.737325	0.0154813
D2	12	18S	0.758349	0.0332672
D2	13	18S	0.79797	0.0696514
D2	14	18S	0.867814	0.136258
D2	15	18S	0.985947	0.251154
D2	16	18S	1.17096	0.432931
D2	17	18S	1.4227	0.681437
D2	18	18S	1.70393	0.959425
D2	19	18S	1.99677	1.24903
D2	20	18S	2.27559	1.52461
D2	21	18S	2.52568	1.77147
D2	22	18S	2.73886	1.9814
D2	23	18S	2.92056	2.15987
D2	24	18S	3.05941	2.29548
D2	25	18S	3.18876	2.4216
D2	26	18S	3.29327	2.52287
D2	27	18S	3.37547	2.60182
D2	28	18S	3.46228	2.6854
D2	29	18S	3.52594	2.74582
D2	30	18S	3.57105	2.78769
D2	31	18S	3.62294	2.83635
D2	32	18S	3.66937	2.87954
D2	33	18S	3.70022	2.90716
D2	34	18S	3.73276	2.93645
D2	35	18S	3.76792	2.96838
D2	36	18S	3.79693	2.99415
D2	37	18S	3.82215	3.01614
D2	38	18S	3.84627	3.03702
D2	39	18S	3.87074	3.05825
D2	40	18S	3.88401	3.06828
D3	1	18S	0.695866	0.000838082
D3	2	18S	0.698097	0.000646872
D3	3	18S	0.699016	-0.000856116
D3	4	18S	0.703115	0.000820266
D3	5	18S	0.70507	0.000352551
D3	6	18S	0.707768	0.000629238
D3	7	18S	0.708977	-0.000584728
D3	8	18S	0.710891	-0.00109309
D3	9	18S	0.715138	0.000731883
D3	10	18S	0.72159	0.00476241
D3	11	18S	0.731957	0.0127071
D3	12	18S	0.748824	0.0271515
D3	13	18S	0.779121	0.0550267
D3	14	18S	0.836611	0.110094
D3	15	18S	0.929886	0.200947
D3	16	18S	1.08054	0.349175
D3	17	18S	1.29196	0.558172
D3	18	18S	1.53938	0.803176
D3	19	18S	1.8047	1.06607
D3	20	18S	2.07142	1.33037
D3	21	18S	2.31367	1.5702
D3	22	18S	2.52524	1.77935
D3	23	18S	2.70119	1.95287
D3	24	18S	2.85047	2.09973
D3	25	18S	2.98163	2.22847
D3	26	18S	3.09536	2.33978
D3	27	18S	3.18802	2.43002
D3	28	18S	3.26379	2.50337
D3	29	18S	3.33252	2.56967
D3	30	18S	3.3911	2.62583
D3	31	18S	3.44072	2.67302
D3	32	18S	3.49103	2.72091
D3	33	18S	3.52916	2.75662
D3	34	18S	3.55623	2.78127
D3	35	18S	3.59285	2.81546
D3	36	18S	3.62798	2.84817
D3	37	18S	3.65144	2.86921
D3	38	18S	3.68057	2.89592
D3	39	18S	3.69283	2.90576
D3	40	18S	3.71644	2.92695
D4	1	18S	0.700187	-0.000331399
D4	2	18S	0.70348	0.000583323
D4	3	18S	0.706286	0.0010109
D4	4	18S	0.706487	-0.00116625
D4	5	18S	0.710921	0.000889062
D4	6	18S	0.713088	0.000677733
D4	7	18S	0.714024	-0.000764253
D4	8	18S	0.718103	0.000936594
D4	9	18S	0.718812	-0.00073344
D4	10	18S	0.721149	-0.000774359
D4	11	18S	0.72397	-0.000331587
D4	12	18S	0.725718	-0.000962414
D4	13	18S	0.727995	-0.0010633
D4	14	18S	0.731315	-0.000121692
D4	15	18S	0.736218	0.00240301
D4	16	18S	0.743936	0.00774218
D4	17	18S	0.7587	0.0201282
D4	18	18S	0.784261	0.0433113
D4	19	18S	0.828598	0.0852697
D4	20	18S	0.913786	0.168079
D4	21	18S	1.04767	0.29959
D4	22	18S	1.25346	0.502998
D4	23	18S	1.51994	0.767102
D4	24	18S	1.80871	1.05349
D4	25	18S	2.08263	1.32503
D4	26	18S	2.33026	1.57028
D4	27	18S	2.55275	1.7904
D4	28	18S	2.7323	1.96756
D4	29	18S	2.88103	2.11392
D4	30	18S	3.00992	2.24043
D4	31	18S	3.11824	2.34637
D4	32	18S	3.2099	2.43566
D4	33	18S	3.28808	2.51146
D4	34	18S	3.35416	2.57516
D4	35	18S	3.42006	2.63868
D4	36	18S	3.46983	2.68607
D4	37	18S	3.52242	2.73628
D4	38	18S	3.56298	2.77446
D4	39	18S	3.59648	2.80558
D4	40	18S	3.62661	2.83333
D5	1	18S	0.737506	-0.000886845
D5	2	18S	0.740164	-0.000593415
D5	3	18S	0.743954	0.000832623
D5	4	18S	0.743693	-0.00179201
D5	5	18S	0.749071	0.00122243
D5	6	18S	0.751336	0.00112319
D5	7	18S	0.752809	0.000232093
D5	8	18S	0.754468	-0.000472914
D5	9	18S	0.757027	-0.000278189
D5	10	18S	0.758531	-0.00113799
D5	11	18S	0.761792	-0.000240585
D5	12	18S	0.763506	-0.000891113
D5	13	18S	0.766781	1.98811e-05
D5	14	18S	0.768921	-0.000203699
D5	15	18S	0.773075	0.00158628
D5	16	18S	0.782202	0.00834944
D5	17	18S	0.79744	0.0212234
D5	18	18S	0.824309	0.0457282
D5	19	18S	0.87068	0.0897351
D5	20	18S	0.95751	0.174201
D5	21	18S	1.09984	0.314165
D5	22	18S	1.31127	0.523231
D5	23	18S	1.57799	0.787587
D5	24	18S	1.84942	1.05666
D5	25	18S	2.09991	1.30478
D5	26	18S	2.3131	1.51561
D5	27	18S	2.51385	1.714
D5	28	18S	2.6645	1.86228
D5	29	18S	2.79219	1.9876
D5	30	18S	2.89613	2.08918
D5	31	18S	2.98575	2.17644
D5	32	18S	3.0617	2.25002
D5	33	18S	3.12346	2.30942
D5	34	18S	3.17764	2.36123
D5	35	18S	3.22929	2.41052
D5	36	18S	3.27351	2.45238
D5	37	18S	3.30946	2.48596
D5	38	18S	3.34351	2.51765
D5	39	18S	3.37169	2.54347
D5	40	18S	3.39517	2.56458
D6	1	18S	0.693834	8.33155e-06
D6	2	18S	0.6953	-0.000927996
D6	3	18S	0.698111	-0.000518213
D6	4	18S	0.700721	-0.000310072
D6	5	18S	0.703737	0.000303798
D6	6	18S	0.706859	0.00102341
D6	7	18S	0.709196	0.000959095
D6	8	18S	0.71099	0.000350831
D6	9	18S	0.713661	0.000619411
D6	10	18S	0.715064	-0.000378786
D6	11	18S	0.716097	-0.00174784
D6	12	18S	0.718953	-0.00129407
D6	13	18S	0.720836	-0.00181335
D6	14	18S	0.724981	-7.01465e-05
D6	15	18S	0.730329	0.00287593
D6	16	18S	0.739038	0.0091836
D6	17	18S	0.754265	0.0220086
D6	18	18S	0.782985	0.0483265
D6	19	18S	0.834969	0.0979089
D6	20	18S	0.929245	0.189782
D6	21	18S	1.08439	0.342529
D6	22	18S	1.31802	0.573751
D6	23	18S	1.6167	0.870032
D6	24	18S	1.91907	1.17
D6	25	18S	2.20401	1.45254
D6	26	18S	2.44939	1.69552
D6	27	18S	2.66536	1.90908
D6	28	18S	2.84495	2.08627
D6	29	18S	2.98544	2.22436
D6	30	18S	3.11206	2.34858
D6	31	18S	3.20802	2.44213
D6	32	18S	3.29824	2.52995
D6	33	18S	3.37098	2.60029
D6	34	18S	3.43302	2.65993
D6	35	18S	3.48669	2.7112
D6	36	18S	3.53706	2.75916
D6	37	18S	3.5766	2.79631
D6	38	18S	3.61966	2.83696
D6	39	18S	3.65386	2.86876
D6	40	18S	3.67919	2.89169
D7	1	CBF1	1.08477	-0.00277664
D7	2	CBF1	1.08474	-0.00320136
D7	3	CBF1	1.08784	-0.00049195
D7	4	CBF1	1.08852	-0.000205705
D7	5	CBF1	1.08868	-0.00043349
D7	6	CBF1	1.08981	0.00030873
D7	7	CBF1	1.0902	0.000305178
D7	8	CBF1	1.08913	-0.00115225
D7	9	CBF1	1.09121	0.000537444
D7	10	CBF1	1.09267	0.00160534
D7	11	CBF1	1.09137	-7.81058e-05
D7	12	CBF1	1.09242	0.000580668
D7	13	CBF1	1.09348	0.00125375
D7	14	CBF1	1.09348	0.000862407
D7	15	CBF1	1.09191	-0.00109511
D7	16	CBF1	1.09398	0.000577305
D7	17	CBF1	1.0924	-0.00139153
D7	18	CBF1	1.09378	-0.000400045
D7	19	CBF1	1.0938	-0.000769213
D7	20	CBF1	1.09385	-0.00110691
D7	21	CBF1	1.09585	0.000498267
D7	22	CBF1	1.09495	-0.000788931
D7	23	CBF1	1.09492	-0.00121103
D7	24	CBF1	1.09753	0.00100927
D7	25	CBF1	1.09849	0.00158591
D7	26	CBF1	1.10536	0.008064
D7	27	CBF1	1.11611	0.0184253
D7	28	CBF1	1.13565	0.0375719
D7	29	CBF1	1.17309	0.0746193
D7	30	CBF1	1.23022	0.131366
D7	31	CBF1	1.32137	0.222123
D7	32	CBF1	1.43728	0.33765
D7	33	CBF1	1.56369	0.463662
D7	34	CBF1	1.69377	0.593354
D7	35	CBF1	1.8149	0.714098
D7	36	CBF1	1.92368	0.822482
D7	37	CBF1	2.01543	0.913849
D7	38	CBF1	2.09311	0.991133
D7	39	CBF1	2.16053	1.05816
D7	40	CBF1	2.2191	1.11634
D8	1	CBF1	0.715262	-0.00558187
D8	2	CBF1	0.718122	-0.00375073
D8	3	CBF1	0.720631	-0.00227097
D8	4	CBF1	0.721897	-0.00203462
D8	5	CBF1	0.724514	-0.000447032
D8	6	CBF1	0.726761	0.000770769
D8	7	CBF1	0.727492	0.000472525
D8	8	CBF1	0.728879	0.000830231
D8	9	CBF1	0.729675	0.00059636
D8	10	CBF1	0.731157	0.00104902
D8	11	CBF1	0.731886	0.000748508
D8	12	CBF1	0.733063	0.000896345
D8	13	CBF1	0.734978	0.00178233
D8	14	CBF1	0.735467	0.00124191
D8	15	CBF1	0.735781	0.000526314
D8	16	CBF1	0.736614	0.000329756
D8	17	CBF1	0.736952	-0.000361222
D8	18	CBF1	0.738079	-0.000263095
D8	19	CBF1	0.738477	-0.000894827
D8	20	CBF1	0.739391	-0.00101044
D8	21	CBF1	0.740692	-0.000738984
D8	22	CBF1	0.740862	-0.00159799
D8	23	CBF1	0.742287	-0.0012019
D8	24	CBF1	0.743501	-0.00101716
D8	25	CBF1	0.748142	0.00259418
D8	26	CBF1	0.7548	0.00822296
D8	27	CBF1	0.770162	0.0225549
D8	28	CBF1	0.79831	0.0496736
D8	29	CBF1	0.85187	0.102205
D8	30	CBF1	0.94337	0.192675
D8	31	CBF1	1.08961	0.337889
D8	32	CBF1	1.28932	0.536566
D8	33	CBF1	1.51787	0.764091
D8	34	CBF1	1.71875	0.963935
D8	35	CBF1	1.89856	1.14272
D8	36	CBF1	2.04581	1.28894
D8	37	CBF1	2.17148	1.41358
D8	38	CBF1	2.27116	1.51223
D8	39	CBF1	2.35173	1.59177
D8	40	CBF1	2.42006	1.65907
D9	1	CBF1	0.582966	-0.00542689
D9	2	CBF1	0.585809	-0.00361778
D9	3	CBF1	0.588217	-0.00224403
D9	4	CBF1	0.58975	-0.00174522
D9	5	CBF1	0.592407	-0.000122375
D9	6	CBF1	0.593388	-0.000176095
D9	7	CBF1	0.593387	-0.00121097
D9	8	CBF1	0.596051	0.000418489
D9	9	CBF1	0.5988	0.00213383
D9	10	CBF1	0.598471	0.000771077
D9	11	CBF1	0.600042	0.00130756
D9	12	CBF1	0.60206	0.00229144
D9	13	CBF1	0.601373	0.000570042
D9	14	CBF1	0.603074	0.00123742
D9	15	CBF1	0.604267	0.00139625
D9	16	CBF1	0.6045	0.00059479
D9	17	CBF1	0.604885	-5.4738e-05
D9	18	CBF1	0.604845	-0.00112871
D9	19	CBF1	0.606828	-0.000179403
D9	20	CBF1	0.606545	-0.00149734
D9	21	CBF1	0.607895	-0.00118097
D9	22	CBF1	0.608337	-0.00177346
D9	23	CBF1	0.610423	-0.000721393
D9	24	CBF1	0.613492	0.00131379
D9	25	CBF1	0.618446	0.00523308
D9	26	CBF1	0.628978	0.0147311
D9	27	CBF1	0.647251	0.0319704
D9	28	CBF1	0.683243	0.0669276
D9	29	CBF1	0.748895	0.131545
D9	30	CBF1	0.865494	0.247111
D9	31	CBF1	1.04539	0.42597
D9	32	CBF1	1.28816	0.667711
D9	33	CBF1	1.54645	0.924965
D9	34	CBF1	1.77676	1.15424
D9	35	CBF1	1.97455	1.351
D9	36	CBF1	2.13908	1.51449
D9	37	CBF1	2.27685	1.65123
D9	38	CBF1	2.37864	1.75199
D9	39	CBF1	2.46828	1.84059
D9	40	CBF1	2.53838	1.90965
D10	1	CBF1	0.68425	-0.0097642
D10	2	CBF1	0.686458	-0.00801399
D10	3	CBF1	0.687731	-0.00719946
D10	4	CBF1	0.689118	-0.00627132
D10	5	CBF1	0.691181	-0.00466685
D10	6	CBF1	0.692775	-0.00353159
D10	7	CBF1	0.694535	-0.00223027
D10	8	CBF1	0.695511	-0.00171298
D10	9	CBF1	0.697287	-0.000395447
D10	10	CBF1	0.698102	-3.89179e-05
D10	11	CBF1	0.698953	0.000353672
D10	12	CBF1	0.700641	0.00158305
D10	13	CBF1	0.701071	0.0015543
D10	14	CBF1	0.704087	0.00411143
D10	15	CBF1	0.70396	0.00352597
D10	16	CBF1	0.70421	0.00331792
D10	17	CBF1	0.704631	0.00327993
D10	18	CBF1	0.705548	0.00373862
D10	19	CBF1	0.705508	0.00324012
D10	20	CBF1	0.705657	0.00293045
D10	21	CBF1	0.706337	0.00315197
D10	22	CBF1	0.706739	0.00309574
D10	23	CBF1	0.707759	0.00365719
D10	24	CBF1	0.706746	0.00218493
D10	25	CBF1	0.707857	0.00283787
D10	26	CBF1	0.707481	0.00200296
D10	27	CBF1	0.707382	0.00144558
D10	28	CBF1	0.708313	0.00191816
D10	29	CBF1	0.708877	0.00202345
D10	30	CBF1	0.706644	-0.000668261
D10	31	CBF1	0.707512	-0.000258624
D10	32	CBF1	0.707416	-0.000813211
D10	33	CBF1	0.707833	-0.000854364
D10	34	CBF1	0.70755	-0.00159617
D10	35	CBF1	0.70679	-0.00281481
D10	36	CBF1	0.706663	-0.00340063
D10	37	CBF1	0.706076	-0.00444642
D10	38	CBF1	0.706542	-0.00443822
D10	39	CBF1	0.706823	-0.00461575
D10	40	CBF1	0.707872	-0.00402545
D11	1	CBF1	0.639252	-0.00790713
D11	2	CBF1	0.640682	-0.00702264
D11	3	CBF1	0.642011	-0.00623829
D11	4	CBF1	0.643101	-0.00569229
D11	5	CBF1	0.644854	-0.00448421
D11	6	CBF1	0.646703	-0.00318022
D11	7	CBF1	0.647224	-0.00320375
D11	8	CBF1	0.649126	-0.00184725
D11	9	CBF1	0.651205	-0.000312297
D11	10	CBF1	0.651769	-0.000293148
D11	11	CBF1	0.653787	0.00117958
D11	12	CBF1	0.655347	0.0021949
D11	13	CBF1	0.656174	0.00247762
D11	14	CBF1	0.657484	0.00324284
D11	15	CBF1	0.657912	0.00312633
D11	16	CBF1	0.657393	0.0020624
D11	17	CBF1	0.659295	0.00341896
D11	18	CBF1	0.658917	0.00249618
D11	19	CBF1	0.660195	0.00322945
D11	20	CBF1	0.662048	0.00453773
D11	21	CBF1	0.661097	0.00304232
D11	22	CBF1	0.661522	0.00292259
D11	23	CBF1	0.66166	0.00251563
D11	24	CBF1	0.660987	0.00129768
D11	25	CBF1	0.663147	0.00291328
D11	26	CBF1	0.663079	0.00230056
D11	27	CBF1	0.663032	0.00170906
D11	28	CBF1	0.66232	0.000451896
D11	29	CBF1	0.663446	0.00103353
D11	30	CBF1	0.662532	-0.000426049
D11	31	CBF1	0.663977	0.000474951
D11	32	CBF1	0.663459	-0.000588679
D11	33	CBF1	0.663654	-0.000938244
D11	34	CBF1	0.663083	-0.00205373
D11	35	CBF1	0.663457	-0.00222496
D11	36	CBF1	0.663049	-0.00317778
D11	37	CBF1	0.662583	-0.00418836
D11	38	CBF1	0.663694	-0.00362151
D11	39	CBF1	0.663704	-0.00415674
D11	40	CBF1	0.663746	-0.00465895
D12	1	CBF1	0.639056	-0.00954178
D12	2	CBF1	0.641041	-0.00827823
D12	3	CBF1	0.642361	-0.00767938
D12	4	CBF1	0.645647	-0.00511519
D12	5	CBF1	0.646422	-0.00506125
D12	6	CBF1	0.648384	-0.00382129
D12	7	CBF1	0.650751	-0.00217519
D12	8	CBF1	0.653237	-0.00041054
D12	9	CBF1	0.654769	0.000399724
D12	10	CBF1	0.656544	0.00145323
D12	11	CBF1	0.656132	0.000320149
D12	12	CBF1	0.658524	0.00199063
D12	13	CBF1	0.659536	0.00228054
D12	14	CBF1	0.65991	0.00193358
D12	15	CBF1	0.661476	0.00277758
D12	16	CBF1	0.661963	0.00254393
D12	17	CBF1	0.662793	0.00265158
D12	18	CBF1	0.663902	0.00303966
D12	19	CBF1	0.664768	0.00318384
D12	20	CBF1	0.666224	0.00391907
D12	21	CBF1	0.66693	0.00390333
D12	22	CBF1	0.666374	0.00262612
D12	23	CBF1	0.666702	0.00223243
D12	24	CBF1	0.667398	0.00220722
D12	25	CBF1	0.667511	0.00159788
D12	26	CBF1	0.669221	0.0025866
D12	27	CBF1	0.669035	0.00167929
D12	28	CBF1	0.668777	0.000699809
D12	29	CBF1	0.669329	0.000530173
D12	30	CBF1	0.669909	0.000389386
D12	31	CBF1	0.670706	0.000464844
D12	32	CBF1	0.670346	-0.000616505
D12	33	CBF1	0.669797	-0.00188746
D12	34	CBF1	0.671108	-0.00129767
D12	35	CBF1	0.670387	-0.00274064
D12	36	CBF1	0.670133	-0.00371518
D12	37	CBF1	0.67115	-0.00342008
D12	38	CBF1	0.672315	-0.0029768
D12	39	CBF1	0.67152	-0.00449344
D12	40	CBF1	0.671352	-0.00538262
E1	1	18S	0.848546	0.00137767
E1	2	18S	0.850532	0.000329699
E1	3	18S	0.853947	0.000711586
E1	4	18S	0.856206	-6.29766e-05
E1	5	18S	0.860028	0.000724878
E1	6	18S	0.861181	-0.00115589
E1	7	18S	0.86374	-0.00163028
E1	8	18S	0.868278	-0.000125919
E1	9	18S	0.872976	0.0015386
E1	10	18S	0.881865	0.0073941
E1	11	18S	0.892771	0.0152664
E1	12	18S	0.913723	0.0331852
E1	13	18S	0.951548	0.0679768
E1	14	18S	1.01697	0.130369
E1	15	18S	1.11912	0.229485
E1	16	18S	1.26466	0.371983
E1	17	18S	1.44207	0.546366
E1	18	18S	1.6338	0.735065
E1	19	18S	1.8302	0.928427
E1	20	18S	2.00707	1.10227
E1	21	18S	2.16791	1.26007
E1	22	18S	2.30648	1.3956
E1	23	18S	2.42786	1.51395
E1	24	18S	2.52457	1.60763
E1	25	18S	2.61568	1.6957
E1	26	18S	2.6879	1.76489
E1	27	18S	2.75548	1.82944
E1	28	18S	2.81233	1.88325
E1	29	18S	2.85936	1.92725
E1	30	18S	2.90122	1.96608
E1	31	18S	2.93501	1.99683
E1	32	18S	2.96755	2.02634
E1	33	18S	2.99762	2.05337
E1	34	18S	3.02268	2.0754
E1	35	18S	3.04309	2.09278
E1	36	18S	3.06966	2.11632
E1	37	18S	3.08853	2.13215
E1	38	18S	3.10783	2.14842
E1	39	18S	3.11661	2.15416
E1	40	18S	3.13472	2.16924
E2	1	18S	0.666899	-0.00160595
E2	2	18S	0.671106	6.65545e-05
E2	3	18S	0.674488	0.000914608
E2	4	18S	0.676894	0.000786516
E2	5	18S	0.67666	-0.00198194
E2	6	18S	0.680633	-0.000543863
E2	7	18S	0.683025	-0.000685545
E2	8	18S	0.687755	0.00151023
E2	9	18S	0.693905	0.00512549
E2	10	18S	0.704536	0.0132227
E2	11	18S	0.723466	0.0296174
E2	12	18S	0.753399	0.057017
E2	13	18S	0.810946	0.112029
E2	14	18S	0.906387	0.204936
E2	15	18S	1.05578	0.351794
E2	16	18S	1.26706	0.56054
E2	17	18S	1.50837	0.799313
E2	18	18S	1.74718	1.03559
E2	19	18S	1.98819	1.27407
E2	20	18S	2.19831	1.48165
E2	21	18S	2.37767	1.65848
E2	22	18S	2.52532	1.8036
E2	23	18S	2.64537	1.92111
E2	24	18S	2.74782	2.02102
E2	25	18S	2.8355	2.10617
E2	26	18S	2.91399	2.18213
E2	27	18S	2.97805	2.24365
E2	28	18S	3.03328	2.29635
E2	29	18S	3.07577	2.33631
E2	30	18S	3.11882	2.37682
E2	31	18S	3.1513	2.40677
E2	32	18S	3.18773	2.44066
E2	33	18S	3.21386	2.46426
[truncated: 1,847 more rows]

## Sheet: BioGroup Analysis Result
Block Type	96alum
Chemistry	SYBR_GREEN
Experiment File Name	D:\Documents and Settings\INSTR-ADMIN\Recent\1116Untitled.eds
Experiment Run End Time	2013-01-09 02:38:13 AM CST
Instrument Type	sds7500
Passive Reference	ROX
Biogroup Name	Target Name	Task	RQ	RQ Min	RQ Max	Cт Mean	ΔCт Mean	ΔCт SE	ΔΔCт
Analysis Type	Singleplex
Endogenous Control	18S
RQ Min/Max Confidence Level	95.0
Reference Biogroup Name

## Sheet: Technical Analysis Result
Block Type	96alum
Chemistry	SYBR_GREEN
Experiment File Name	D:\Documents and Settings\INSTR-ADMIN\Recent\1116Untitled.eds
Experiment Run End Time	2013-01-09 02:38:13 AM CST
Instrument Type	sds7500
Passive Reference	ROX
Sample Name	Target Name	Task	RQ	RQ Min	RQ Max	Cт Mean	ΔCт Mean	ΔCт SE	ΔΔCт
3-1	CBF1	UNKNOWN
12-1	CBF1	UNKNOWN				30.4666	16.6057	0.386907
3-2	CBF1	UNKNOWN				32.656	10.8218	5.24663
12-2	CBF1	UNKNOWN				34.1157	16.746	0.658361
3-3	CBF1	UNKNOWN				29.6571	16.3156	0.299935
12-3	CBF1	UNKNOWN
6-1	CBF1	UNKNOWN				28.4998	13.0326	0.490912
24-1	CBF1	UNKNOWN
6-2	CBF1	UNKNOWN				26.5385	12.0474	0.266045
24-2	CBF1	UNKNOWN				36.4656	20.6197	0.300629
6-3	CBF1	UNKNOWN				28.4313	13.404	0.184707
24-3	CBF1	UNKNOWN
Analysis Type	Singleplex
Endogenous Control	18S
RQ Min/Max Confidence Level	95.0
Reference Sample	3-1
