# Supplementary material for: Genome-wide identification of CBF genes and their responses to cold acclimation in Taraxacum kok-saghyz
Source: PeerJ journal article supplement (doi:10.7717/peerj.13429), 2022-05-12
Supplement: Raw_data.zip [file CBF2-CBF3.xls]

## Sheet: Results
Block Type	96alum
Chemistry	SYBR_GREEN
Experiment File Name	D:\HAIFENG\CBF217.eds
Experiment Run End Time	2021-08-27 15:22:27 PM CST
Instrument Type	sds7500
Passive Reference	ROX
Well	Sample Name	Target Name	Task	Reporter	Quencher	RQ	RQ Min	RQ Max	Cт	Cт Mean	Cт SD	ΔCт	ΔCт Mean	ΔCт SE	HK Control ΔCт Mean	HK Control ΔCт SE	Automatic Ct Threshold	Ct Threshold	Automatic Baseline	Baseline Start	Baseline End	Efficiency	Tm1	Tm2	Tm3	Comments	HIGHSD	NOAMP	OUTLIERRG	EXPFAIL
A1	C3-1	CBF3	UNKNOWN	SYBR	None				30.7164	30.7484	0.0280146						TRUE	0.0361375	TRUE	3	23	1	81.9377				N	N	N	N
A2	C3-1	CBF3	UNKNOWN	SYBR	None				30.7683	30.7484	0.0280146						TRUE	0.0361375	TRUE	3	23	1	82.1136				N	N	N	N
A3	C3-1	CBF3	UNKNOWN	SYBR	None				30.7605	30.7484	0.0280146						TRUE	0.0361375	TRUE	3	23	1	82.1136				N	N	N	N
A4	C12-3	CBF3	UNKNOWN	SYBR	None				34.3725	34.0959	0.340844						TRUE	0.0361375	TRUE	3	28	1	82.1136				N	N	N	N
A5	C12-3	CBF3	UNKNOWN	SYBR	None				33.7151	34.0959	0.340844						TRUE	0.0361375	TRUE	3	27	1	82.1136				N	N	N	N
A6	C12-3	CBF3	UNKNOWN	SYBR	None				34.2	34.0959	0.340844						TRUE	0.0361375	TRUE	3	27	1	82.1136				N	N	N	N
A7	C3-1	CBF2	UNKNOWN	SYBR	None				30.8455	31.1453	0.558459						TRUE	0.031696	TRUE	3	39	1	61.7073				N	Y	N	Y
A8	C3-1	CBF2	UNKNOWN	SYBR	None				31.3401	31.1453	0.558459						TRUE	0.031696	TRUE	3	31	1	83.8728				Y	N	N	N
A9	C3-1	CBF2	UNKNOWN	SYBR	None				31.2504	31.1453	0.558459						TRUE	0.031696	TRUE	3	30	1	83.345				Y	N	N	N
A10	C12-3	CBF2	UNKNOWN	SYBR	None				35.288	35.3655	0.0197638						TRUE	0.031696	TRUE	3	39	1	66.633				N	Y	N	Y
A11	C12-3	CBF2	UNKNOWN	SYBR	None				35.3627	35.3655	0.0197638						TRUE	0.031696	TRUE	3	39	1	65.9293				N	Y	N	Y
A12	C12-3	CBF2	UNKNOWN	SYBR	None				35.4457	35.3655	0.0197638						TRUE	0.031696	TRUE	3	39	1	64.8738				N	Y	N	Y
B1	C3-2	CBF3	UNKNOWN	SYBR	None				30.7653	30.7093	0.186946						TRUE	0.0361375	TRUE	3	22	1	82.1136				N	N	N	N
B2	C3-2	CBF3	UNKNOWN	SYBR	None				30.5008	30.7093	0.186946						TRUE	0.0361375	TRUE	3	21	1	82.2895				N	N	N	N
B3	C3-2	CBF3	UNKNOWN	SYBR	None				30.8619	30.7093	0.186946						TRUE	0.0361375	TRUE	3	22	1	82.2895				N	N	N	N
B7	C3-2	CBF2	UNKNOWN	SYBR	None				29.5854	30.4119	1.01752						TRUE	0.031696	TRUE	3	31	1	83.6969				Y	N	N	N
B8	C3-2	CBF2	UNKNOWN	SYBR	None				30.8758	30.4119	1.01752						TRUE	0.031696	TRUE	3	29	1	83.5209				Y	N	N	N
B9	C3-2	CBF2	UNKNOWN	SYBR	None				30.7746	30.4119	1.01752						TRUE	0.031696	TRUE	3	29	1	83.5209				Y	N	N	N
C1	C3-3	CBF3	UNKNOWN	SYBR	None				29.9945	29.9483	0.0922045						TRUE	0.0361375	TRUE	3	23	1	82.2895				N	N	N	N
C2	C3-3	CBF3	UNKNOWN	SYBR	None				29.0084	29.9483	0.0922045						TRUE	0.0361375	TRUE	3	23	1	82.2895				N	N	N	N
C3	C3-3	CBF3	UNKNOWN	SYBR	None				29.8422	29.9483	0.0922045						TRUE	0.0361375	TRUE	3	23	1	82.4654				N	N	N	N
C7	C3-3	CBF2	UNKNOWN	SYBR	None				30.2504	30.1193	0.842507						TRUE	0.031696	TRUE	3	31	1	83.8728				Y	N	N	N
C8	C3-3	CBF2	UNKNOWN	SYBR	None				30.8886	30.1193	0.842507						TRUE	0.031696	TRUE	3	31	1	83.6969				Y	N	N	N
C9	C3-3	CBF2	UNKNOWN	SYBR	None				29.2189	30.1193	0.842507						TRUE	0.031696	TRUE	3	30	1	83.6969				Y	N	N	N
D1	C6-1	CBF3	UNKNOWN	SYBR	None				28.9064	28.6407	0.24788						TRUE	0.0361375	TRUE	3	25	1	82.2895				N	N	N	N
D2	C6-1	CBF3	UNKNOWN	SYBR	None				28.4157	28.6407	0.24788						TRUE	0.0361375	TRUE	3	25	1	82.4654				N	N	N	N
D3	C6-1	CBF3	UNKNOWN	SYBR	None				28.6	28.6407	0.24788						TRUE	0.0361375	TRUE	3	25	1	82.6414				N	N	N	N
D7	C6-1	CBF2	UNKNOWN	SYBR	None				31.3988	31.5023	0.431692						TRUE	0.031696	TRUE	3	31	1	84.2246				N	N	N	N
D8	C6-1	CBF2	UNKNOWN	SYBR	None				31.5683	31.5023	0.431692						TRUE	0.031696	TRUE	3	32	1	84.2246				N	N	N	N
D9	C6-1	CBF2	UNKNOWN	SYBR	None				31.5399	31.5023	0.431692						TRUE	0.031696	TRUE	3	39	1	64.1702				N	Y	N	Y
E1	C6-2	CBF3	UNKNOWN	SYBR	None				28.8317	28.7504	0.0707441						TRUE	0.0361375	TRUE	3	22	1	82.4654				N	N	N	N
E2	C6-2	CBF3	UNKNOWN	SYBR	None				28.7166	28.7504	0.0707441						TRUE	0.0361375	TRUE	3	22	1	82.6414				N	N	N	N
E3	C6-2	CBF3	UNKNOWN	SYBR	None				28.7029	28.7504	0.0707441						TRUE	0.0361375	TRUE	3	22	1	82.6414				N	N	N	N
E4	C24-1	CBF3	UNKNOWN	SYBR	None				30.1531	30.0754	0.288706						TRUE	0.0361375	TRUE	3	24	1	82.4654				N	N	N	N
E5	C24-1	CBF3	UNKNOWN	SYBR	None				30.1764	30.0754	0.288706						TRUE	0.0361375	TRUE	3	23	1	82.6414				N	N	N	N
E6	C24-1	CBF3	UNKNOWN	SYBR	None				29.8967	30.0754	0.288706						TRUE	0.0361375	TRUE	3	24	1	82.8173				N	N	N	N
E7	C6-2	CBF2	UNKNOWN	SYBR	None				30.8486	31.3965	0.923844						TRUE	0.031696	TRUE	3	30	1	84.4005				Y	N	N	N
E8	C6-2	CBF2	UNKNOWN	SYBR	None				32.4631	31.3965	0.923844						TRUE	0.031696	TRUE	3	31	1	84.2246				Y	N	Y	N
E9	C6-2	CBF2	UNKNOWN	SYBR	None				30.8776	31.3965	0.923844						TRUE	0.031696	TRUE	3	29	1	84.2246				Y	N	N	N
E10	C24-1	CBF2	UNKNOWN	SYBR	None				32.6249	32.6158	1.91059						TRUE	0.031696	TRUE	3	34	1	83.5209				Y	N	Y	N
E11	C24-1	CBF2	UNKNOWN	SYBR	None				32.6287	32.6158	1.91059						TRUE	0.031696	TRUE	3	30	1	83.1691				Y	N	N	N
E12	C24-1	CBF2	UNKNOWN	SYBR	None				32.6029	32.6158	1.91059						TRUE	0.031696	TRUE	3	30	1	83.1691				Y	N	N	N
F1	C6-3	CBF3	UNKNOWN	SYBR	None				29.2473	28.969	0.244612						TRUE	0.0361375	TRUE	3	22	1	82.2895				N	N	N	N
F2	C6-3	CBF3	UNKNOWN	SYBR	None				28.788	28.969	0.244612						TRUE	0.0361375	TRUE	3	22	1	82.4654				N	N	N	N
F3	C6-3	CBF3	UNKNOWN	SYBR	None				28.8718	28.969	0.244612						TRUE	0.0361375	TRUE	3	22	1	82.4654				N	N	N	N
F4	C24-2	CBF3	UNKNOWN	SYBR	None				26.5139	29.253	0.162339						TRUE	0.0361375	TRUE	3	24	1	82.4654				N	N	N	N
F5	C24-2	CBF3	UNKNOWN	SYBR	None				26.3559	29.253	0.162339						TRUE	0.0361375	TRUE	3	23	1	82.4654				N	N	N	N
F6	C24-2	CBF3	UNKNOWN	SYBR	None				26.1892	29.253	0.162339						TRUE	0.0361375	TRUE	3	23	1	82.6414				N	N	N	N
F7	C6-3	CBF2	UNKNOWN	SYBR	None				31.68	31.6664	0.987711						TRUE	0.031696	TRUE	3	31	1	84.0487				Y	N	N	N
F8	C6-3	CBF2	UNKNOWN	SYBR	None				31.6299	31.6664	0.987711						TRUE	0.031696	TRUE	3	29	1	84.0487				Y	N	Y	N
F9	C6-3	CBF2	UNKNOWN	SYBR	None				31.6892	31.6664	0.987711						TRUE	0.031696	TRUE	3	31	1	84.2246				Y	N	N	N
F10	C24-2	CBF2	UNKNOWN	SYBR	None				32.7769	32.4714	0.442633						TRUE	0.031696	TRUE	3	30	1	83.345				N	N	N	N
F11	C24-2	CBF2	UNKNOWN	SYBR	None				31.9638	32.4714	0.442633						TRUE	0.031696	TRUE	3	29	1	83.345				N	N	N	N
F12	C24-2	CBF2	UNKNOWN	SYBR	None				32.6735	32.4714	0.442633						TRUE	0.031696	TRUE	3	30	1	83.1691				N	N	N	N
G1	C12-1	CBF3	UNKNOWN	SYBR	None				34.6663	34.4537	0.193735						TRUE	0.0361375	TRUE	3	26	1	81.9377				N	N	N	N
G2	C12-1	CBF3	UNKNOWN	SYBR	None				34.4075	34.4537	0.193735						TRUE	0.0361375	TRUE	3	26	1	81.9377				N	N	N	N
G3	C12-1	CBF3	UNKNOWN	SYBR	None				34.2872	34.4537	0.193735						TRUE	0.0361375	TRUE	3	26	1	82.1136				N	N	N	N
G4	C24-3	CBF3	UNKNOWN	SYBR	None				30.218	30.1231	1.86034						TRUE	0.0361375	TRUE	3	25	1	82.2895				Y	N	N	N
G5	C24-3	CBF3	UNKNOWN	SYBR	None				30.1076	30.1231	1.86034						TRUE	0.0361375	TRUE	3	24	1	82.2895				Y	N	N	N
G6	C24-3	CBF3	UNKNOWN	SYBR	None				30.0437	30.1231	1.86034						TRUE	0.0361375	TRUE	3	28	1	82.1136				Y	N	N	N
G7	C12-1	CBF2	UNKNOWN	SYBR	None				35.4375	35.6146	0.0862649						TRUE	0.031696	TRUE	3	39	1	64.6979				N	Y	N	Y
G8	C12-1	CBF2	UNKNOWN	SYBR	None				35.6787	35.6146	0.0862649						TRUE	0.031696	TRUE	3	39	1	65.4016				N	Y	N	Y
G9	C12-1	CBF2	UNKNOWN	SYBR	None				35.7277	35.6146	0.0862649						TRUE	0.031696	TRUE	3	39	1	66.2812				N	Y	N	Y
G10	C24-3	CBF2	UNKNOWN	SYBR	None				33.3514	33.5014	1.14749						TRUE	0.031696	TRUE	3	39	1	66.1052				N	Y	N	Y
G11	C24-3	CBF2	UNKNOWN	SYBR	None				33.7702	33.5014	1.14749						TRUE	0.031696	TRUE	3	31	1	83.1691				N	N	N	N
G12	C24-3	CBF2	UNKNOWN	SYBR	None				33.3826	33.5014	1.14749						TRUE	0.031696	TRUE	3	39	1	65.9293				N	Y	N	Y
H1	C12-2	CBF3	UNKNOWN	SYBR	None				34.5858	34.4247	0.119936						TRUE	0.0361375	TRUE	3	29	1	81.5859				Y	N	N	N
H2	C12-2	CBF3	UNKNOWN	SYBR	None				34.3836	34.4247	0.119936						TRUE	0.0361375	TRUE	3	29	1	82.2895				Y	N	N	N
H3	C12-2	CBF3	UNKNOWN	SYBR	None				34.3048	34.4247	0.119936						TRUE	0.0361375	TRUE	3	30	1	82.1136				Y	N	N	N
H7	C12-2	CBF2	UNKNOWN	SYBR	None				36.1175	35.9243	0.0107369						TRUE	0.031696	TRUE	3	33	1	83.6969				N	N	N	N
H8	C12-2	CBF2	UNKNOWN	SYBR	None				35.9378	35.9243	0.0107369						TRUE	0.031696	TRUE	3	39	1	65.4016				N	Y	N	Y
H9	C12-2	CBF2	UNKNOWN	SYBR	None				35.7175	35.9243	0.0107369						TRUE	0.031696	TRUE	3	39	1	65.5775				N	Y	N	Y
Analysis Type	Singleplex
Endogenous Control	CBF3
RQ Min/Max Confidence Level	95.0
Reference Sample	C3-1

## Sheet: Raw Data
Block Type	96alum
Chemistry	SYBR_GREEN
Experiment File Name	D:\HAIFENG\CBF117.eds
Experiment Run End Time	2021-08-27 15:22:27 PM CST
Instrument Type	sds7500
Passive Reference	ROX
Well	Cycle	1	2	3	4	5
A1	1	263819	70882	45804	438454	1543.02
A2	1	240166	59478.7	43072.4	373755	1757.15
A3	1	195228	48249	40502.1	347503	1012.25
A4	1	187437	42041.7	42946.9	349338	1433.33
A5	1	203472	45149.5	45696.6	351311	1433.83
A6	1	171538	38555.5	43557.3	339953	1160.75
A7	1	176020	40701.1	42989.8	325554	1303.86
A8	1	204312	44476.6	48407	365144	2034.07
A9	1	202592	45477.6	49285	385247	1795.84
A10	1	234194	53330.6	51421.2	409390	1931.36
A11	1	239930	55393	50162.8	436763	0
A12	1	260949	65632.6	51814.2	466283	1778.44
B1	1	251060	64930.9	44420	387806	1863.68
B2	1	232476	57835.5	44610.4	363926	1847.19
B3	1	208766	48595.5	41745.3	321612	1372.12
B4	1	211407	50890	46759.8	353438	8400.29
B5	1	201112	50029.3	47158	340471	1827.64
B6	1	199143	48744.7	48711.5	344915	2016.23
B7	1	186265	44098.2	47103.3	333644	1689.05
B8	1	214668	49180.9	53502.7	375215	2097.8
B9	1	219734	51244.8	52976.7	384829	1485.03
B10	1	214883	47317.9	54304.3	415530	2039.22
B11	1	238757	52722.8	55916.8	445414	2013.72
B12	1	235780	54329.4	49842.5	427811	1845.03
C1	1	311122	82757.8	55598.2	456566	2537.19
C2	1	263197	67490.4	51988.4	401975	1827.42
C3	1	234462	58855.3	51632.6	380065	1745.54
C4	1	186585	43243.3	43233	309901	1432.9
C5	1	217873	52699.5	51962.1	357975	1985.26
C6	1	211848	50609.3	54030.3	366997	1879.71
C7	1	174236	39844.6	50528.9	344370	1916.09
C8	1	203158	46924.6	59501.4	407344	1693.19
C9	1	208289	47650.4	55570.8	389680	1478.67
C10	1	218984	50556.8	57268.6	416385	1853.51
C11	1	232918	55062	57328.2	443808	1998.57
C12	1	234580	58262.2	54855.4	457829	1482.83
D1	1	369405	97173.6	67756.7	536959	3116.79
D2	1	276727	69560	56349.5	417194	1432.14
D3	1	262520	65886.7	58365.6	407499	2040.86
D4	1	250931	60931.7	59102.4	398024	1693.66
D5	1	257923	62697.6	64364.1	417275	2013.74
D6	1	260724	62265.8	66700.3	424009	1871.18
D7	1	211492	47602	65084.8	410163	2469.73
D8	1	191319	41980.1	56955.6	369821	1359.76
D9	1	200586	44760.9	58939	390978	1655.98
D10	1	241136	55752.4	63187.2	438819	1729.22
D11	1	234061	57777.9	57360.2	430424	576.859
D12	1	281860	70793.5	64260.3	513840	2326.83
E1	1	358919	98176.6	68880.4	539773	2487.63
E2	1	299080	77185.7	62592	458946	2172.51
E3	1	283442	73046.6	64796.3	440960	1641.94
E4	1	285306	70831.8	71633.1	463360	2432.56
E5	1	266325	66026.3	70113.8	444984	1984.34
E6	1	271061	66451.2	75200.8	465075	1988.56
E7	1	232026	58282.5	69971.6	431813	1949.88
E8	1	256429	64312.6	75117.3	471293	2248.34
E9	1	254962	64156.6	71446.9	463516	2108.84
E10	1	208325	41080.6	64287.8	448453	1912.46
E11	1	242485	58606.1	61679.2	452294	1725.2
E12	1	281399	67396.7	66338.7	524959	2128.85
F1	1	346906	92878.5	69917.1	530248	2445.5
F2	1	295377	78267.1	62992.2	462698	1879.52
F3	1	295350	77752.9	68834.7	459535	2055.69
F4	1	293529	73502.6	72949.4	473048	2357.66
F5	1	297270	72030.1	79269.4	511698	1410.48
F6	1	283136	68453.1	76632.6	478553	2016.33
F7	1	239739	59106	66325.2	404927	1780.63
F8	1	266933	64363.4	72486.5	449691	2777.01
F9	1	289062	70087	76804.2	495906	2570.04
F10	1	274655	67287.5	73525.7	511566	1752.29
F11	1	274520	67789.1	69603.5	517745	718.129
F12	1	301708	75759.7	70024.9	566980	2300.81
G1	1	358345	94674	66027.1	528505	2379.53
G2	1	351981	92655.4	69128	515847	2086.94
G3	1	346832	88980.7	76130	538992	1568.31
G4	1	338320	82740.8	77355.5	515091	2798.49
G5	1	296305	70726	75017.8	494946	1954.43
G6	1	281924	70118.4	76394.9	496228	2162.82
G7	1	241721	55653.8	70450.8	450923	2336.14
G8	1	255933	59920.5	74767.4	489128	2287.45
G9	1	267842	63498.7	76620.9	518049	2570.72
G10	1	258673	59855.1	65075.4	461779	1258.15
G11	1	255155	61701.3	61092.2	455439	1740.61
G12	1	291315	69952.6	67084.9	556361	1944.55
H1	1	408606	101728	73503.9	611761	2951.01
H2	1	305706	75576.2	63813.4	504952	1859.16
H3	1	328245	82389	75889.4	561220	2905.03
H4	1	312315	25764.5	13780.4	11288.1	3381.54
H5	1	288372	24075.2	12986.2	10830.4	3305.51
H6	1	243030	19931.9	10689.5	8634.79	2575.88
H7	1	241400	53443.1	71326.7	490440	2543.75
H8	1	261503	57068.3	70876.4	488282	2603.96
H9	1	282492	62503	76771.5	547110	2822.23
H10	1	302852	24197.2	12364.5	9997.54	2249.88
H11	1	303808	23662.7	11571.3	9407.62	2455.55
H12	1	316642	23739.4	10385.1	8536.37	1537.59
A1	2	261347	70145	45507.8	436046	1620.24
A2	2	239099	59612.8	43149	372923	1431.2
A3	2	193728	48095.6	40504.1	346028	1104.45
A4	2	186679	42116.4	42990.3	348241	1381.3
A5	2	204128	45735.9	45886	351274	1452.46
A6	2	171387	38671.3	43711.9	339780	1110.18
A7	2	177595	41477.3	43307.4	324935	1346.5
A8	2	204022	44573.8	48373.9	363772	1814.06
A9	2	202154	45240.5	49287.9	383521	1978.99
A10	2	233260	53335.7	51055.3	407267	2107.49
A11	2	237912	55278.5	49826.7	433356	0
A12	2	259058	65159.7	51665.2	461593	1994.01
B1	2	249360	64559.1	44333	386495	2095.47
B2	2	231952	57365.7	44399.4	362860	1705.35
B3	2	209140	49021.2	41717.9	320997	1617.32
B4	2	210930	50705.6	47055.8	354324	9133.3
B5	2	202071	50439.6	47259.3	340813	1879.04
B6	2	199894	48586.3	48999.8	345895	1866.91
B7	2	188374	44626	47422.7	333900	1729.58
B8	2	216164	49443.4	53637.7	374899	2022.22
B9	2	220758	51597.3	53130.5	385601	1511.31
B10	2	216256	47330.4	54720.6	416558	2151.46
B11	2	236925	52279.6	55570.3	442696	1900.82
B12	2	234770	54472.1	49785.3	425981	2055.51
C1	2	310006	82370.3	55610.4	455687	2147.52
C2	2	263797	67195	52242.4	402757	2048.07
C3	2	234998	58790.2	51789.3	380878	1655.64
C4	2	186107	42716.8	43586.8	311068	1372.34
C5	2	218826	52982.4	52390.4	358294	2203.65
C6	2	212888	50462.6	54251.9	367740	1921.46
C7	2	176060	40118.5	50768.4	344313	2131.09
C8	2	203753	46935.7	59416.6	406084	1666.8
C9	2	209881	48061.6	55981.1	391123	1645.64
C10	2	220076	50966	57500.9	416724	1782.22
C11	2	233017	55291.8	57452	444395	1793.3
C12	2	235139	58677.7	54750.3	457087	1284.02
D1	2	367293	96641.7	68020.6	536256	2975.06
D2	2	277418	69950.1	56321.1	418444	1267.08
D3	2	263378	66221.9	58674.4	409479	1690.89
D4	2	251641	61509.5	59493.3	399505	1613.72
D5	2	259479	63214.6	64510.5	417581	2196.35
D6	2	261811	62689.5	66862.9	424849	2024.71
D7	2	213112	47784.3	65022.6	409421	2663.26
D8	2	192149	41968.8	57228.4	370555	1167.42
D9	2	201677	44850.7	58995.1	391158	2111.29
D10	2	241399	55833.6	63272.2	439768	1619.05
D11	2	234223	57798.5	57560.3	431423	496.927
D12	2	281205	70620.6	64209.7	512203	2201.3
E1	2	358448	97862.3	69086.6	540346	2382.38
E2	2	300529	77286.2	63299.6	460032	1678.34
E3	2	284800	73419	65433.1	442147	1597.3
E4	2	285545	70959.8	72019.7	465096	2212.64
E5	2	266490	66393.4	70525.2	445030	2219.29
E6	2	272398	66884.3	75250.4	465377	2274.74
E7	2	233555	59014.7	70345.2	431196	2237.78
E8	2	257753	64520.6	75209.1	470287	2545.41
E9	2	256274	64048.4	71627.4	463228	2137.3
E10	2	194814	33026	63491.1	446302	1935.8
E11	2	243148	58828.9	61731.1	452171	1648.05
E12	2	280721	67762.3	66144.8	523488	1943.67
F1	2	345536	92834	69858.1	529492	2979.39
F2	2	297010	78911	63338.8	464380	1483.95
F3	2	296276	77815	69204	461079	2141.22
F4	2	294950	73635.7	73397.4	474585	2221.94
F5	2	298259	72447.6	79328.2	511965	2227.18
F6	2	284911	69072.7	76927.3	480313	1916.97
F7	2	241555	59542.1	66565	405316	2000.58
F8	2	268738	65047.8	72718.5	449978	2636.34
F9	2	290347	70317.2	77129.8	495943	2264.83
F10	2	275785	67661.9	73669.2	512252	2002.77
F11	2	274056	67696.6	69619.1	516681	554.685
F12	2	301481	75695.7	69902.3	564905	2188.22
G1	2	355694	93603.5	65703.3	527409	2356.96
G2	2	351198	92812.5	69579.6	516629	2392.44
G3	2	347444	89220.8	76583.7	540475	1805.7
G4	2	339415	83054.4	77618.6	516458	2198.32
G5	2	296598	70882	75292.4	494791	2185.66
G6	2	282045	70423.4	76431.4	496414	2245.23
G7	2	243144	56398.8	70568	450947	2192.29
G8	2	258299	60545.8	75149.6	489275	2593.54
G9	2	269924	64238.1	76738	518495	2286.66
G10	2	259851	60036.2	65281.7	462339	1143.58
G11	2	255224	61684.7	61103.2	454759	1906.21
G12	2	289686	70072.8	66680.5	553912	1694.08
H1	2	408052	100978	73707.1	612910	2794.71
H2	2	305651	75723.4	64095.1	504636	2130.47
H3	2	327670	82195.6	76039.7	560509	2739.87
H4	2	311765	25865.7	13838.5	11383	3274.31
H5	2	286218	24095.2	12992.2	10807.6	2852.08
H6	2	242524	20015.9	10718.8	8575.55	2527.61
H7	2	241475	53847.8	71297.9	489321	2502.19
H8	2	262270	57445.6	70706.8	486340	2880.4
H9	2	283457	62336.1	76737.5	546598	2897.18
H10	2	301728	24021.7	12437.7	10290.9	2542.54
H11	2	301741	23782.7	11553.9	9601.47	2656.19
H12	2	314427	23152.1	10102.5	8668.49	1753.71
A1	3	258511	69560.7	45310.3	432913	1650.84
A2	3	238176	59438.5	43012.3	371352	1596.83
A3	3	193111	47900.7	40317.3	344555	1062.27
A4	3	186387	41927.1	42977.9	346595	1481.89
A5	3	204909	46018.2	46015	350957	1450.03
A6	3	171698	39017.7	43755.7	339050	1216.94
A7	3	178092	41795.3	43210.9	324627	1377.06
A8	3	203912	44670.3	48260.4	361971	1993.39
A9	3	201222	45295.7	49108	382175	2158.29
A10	3	232599	53293.2	51177	405665	2117.55
A11	3	236699	54881.2	49423.2	430269	0
A12	3	255579	64625	51029.2	454574	2123.9
B1	3	247257	64125.7	43939	383853	1555.95
B2	3	231736	57706.9	44361.6	362655	1817.27
B3	3	209597	49506.4	41961.9	321740	1140.66
B4	3	211005	50624.1	47186.9	354505	9874.93
B5	3	202723	50655	47404.6	340665	1889.99
B6	3	200303	48949.4	49170.3	346469	1857.22
B7	3	189536	45239.6	47668	334772	1884.8
B8	3	216949	49858.4	53575.7	375448	1857.55
B9	3	220766	51650.2	53192.9	384809	1650.94
B10	3	216709	47632.7	54883.2	417724	2170.32
B11	3	234580	51794.7	55123.6	438223	1650.39
B12	3	233018	54155.9	49299.9	421987	1927.88
C1	3	306843	81497.9	55264.5	450946	2470.81
C2	3	264111	67720.3	52292.8	402881	2001.46
C3	3	235734	59210	52099	382160	1592.9
C4	3	186107	42570.6	43492.5	311642	1668.29
C5	3	219668	53170.1	52295.6	358837	1973.62
C6	3	213225	50978.1	54265.5	368411	2002.56
C7	3	177034	40679.3	50801.8	344748	2070.37
C8	3	204249	47294.2	59516.1	405311	1615.66
C9	3	210899	48399.8	56154.5	391558	1149.71
C10	3	220097	50993.1	57524.2	416351	2153.45
C11	3	234267	55207.5	57480.2	444637	1948.53
C12	3	235119	59176.6	54812.3	455951	1353.22
D1	3	364828	96230.8	67551.4	532596	3394.08
D2	3	278678	70590.4	56669.3	419131	1297.28
D3	3	265198	66576.8	58912	410279	2035.78
D4	3	252639	61734.8	59615.3	400979	2149.65
D5	3	259898	63487.8	64839.6	418551	1976.42
D6	3	262016	62892.3	67059.8	426099	1572.75
D7	3	213539	48325	65063.4	409351	2568.95
D8	3	193888	42441	57369.4	370198	1546.25
D9	3	202631	44994.1	59072.2	390251	2274.86
D10	3	241306	55521.2	63640.4	440202	1766.24
D11	3	235144	57974.2	57673.3	431412	720.352
D12	3	281181	70948.1	63925.9	510572	2256.65
E1	3	357539	97619	68755.4	538319	2555.97
E2	3	302442	78339.5	63410.1	461824	2293.2
E3	3	285889	74088.8	65836.6	443271	1868.42
E4	3	286889	71767	72319	465888	1939.99
E5	3	268200	66955.9	70635.3	445312	1941.62
E6	3	273125	67348.7	75630.9	466673	2449.57
E7	3	234968	59564.5	70356	431659	2215.33
E8	3	258818	64876.7	75555	470547	2450.8
E9	3	257056	64226.7	71686.7	462810	2369.58
E10	3	188533	29109.8	63135.3	444597	1504.12
E11	3	244117	59008.3	61870.5	452934	1697.39
E12	3	278977	67168	65698.1	520204	1953.41
F1	3	344268	92332.4	69189.8	526678	2587.87
F2	3	298009	79209.8	63421.3	465564	1666.52
F3	3	297619	78236.1	69504.1	462262	2067.17
F4	3	295505	74343.4	73864.6	476072	1842.53
F5	3	299667	72617.8	79679	513071	1506.94
F6	3	286320	69635.8	77382.8	481112	2347.84
F7	3	242588	59794.4	66897.2	406021	2314.25
F8	3	270714	65876.8	73119.5	450254	2773.97
F9	3	290446	70784	77190.8	496010	2412.58
F10	3	277012	68125.8	73852.1	512822	1963.33
F11	3	274994	67994.6	69523.5	516741	720.172
F12	3	299635	75244.7	69324.8	561278	2317.14
G1	3	351967	93488.3	65444.5	524042	2602.28
G2	3	352704	93645.2	69875.3	517209	1656.3
G3	3	348617	89411.6	76913.8	541369	2189.57
G4	3	340894	83250.8	77796.9	517431	2551.71
G5	3	297931	71137.7	75486.9	495335	2429.36
G6	3	282492	70909.8	76965.4	498211	2571.13
G7	3	244587	57036.7	70867	452025	2380.04
G8	3	259587	61289.3	75448.8	489423	2766.51
G9	3	270289	64268.4	77144	518867	2311.01
G10	3	260591	60687.6	65470.7	461699	1549.5
G11	3	256165	62139.9	61106.9	454454	1912.26
G12	3	287833	70031.3	66315.2	549291	1868.05
H1	3	406143	101436	73270	611459	2794.71
H2	3	305914	75840.8	63827.3	502282	1815.65
H3	3	326437	82094.5	76031.2	558712	2731.56
H4	3	311585	25645.3	13777.6	11322.3	3495.36
H5	3	285819	23819.8	12916.2	10654.6	2963.97
H6	3	241865	20028.2	10751.6	8562.98	2442.7
H7	3	241660	53992.3	71029.6	487053	2651.99
H8	3	262396	57556.1	70773.5	484025	2909.16
H9	3	282892	62570.9	76651.4	543570	2989.25
H10	3	300510	24057.9	12265.1	10146.7	2793.21
H11	3	301420	23712.7	11611.5	9608.16	2552.55
H12	3	312533	23270.4	10158.3	8064.78	1941.48
A1	4	258113	69770.8	45304.3	430370	1076.76
A2	4	238952	59503.9	42816.6	370631	1395.1
A3	4	193652	48419	40331.6	344001	1246.68
A4	4	186703	42153.7	42894.8	346550	1585.94
A5	4	206004	46198.2	45912.9	350333	1256.43
A6	4	172313	39137.4	43739.7	338843	1115.8
A7	4	179155	42027.9	43366.9	324632	1418.89
A8	4	204169	45057.7	48094.7	362056	1951.88
A9	4	201668	45434.7	49235.2	381933	1964.53
A10	4	233079	53412.6	51198.9	405274	1894.12
A11	4	236296	55004.1	49488.4	429016	0
A12	4	258536	65144.2	51331.6	458644	2140.49
B1	4	246949	64141.9	44148.2	383356	1903.64
B2	4	232176	57973.4	44483.1	362120	1649.95
B3	4	210250	49870.6	42030	322045	1246.58
B4	4	211806	50870.4	47149.8	355037	9824.91
B5	4	202926	50904.3	47565.8	341343	1954.88
B6	4	201392	49240.6	49252	346568	2004.12
B7	4	190672	45499.2	47657.5	335533	1811.39
B8	4	217972	50215	53763.2	376078	2295.89
B9	4	221541	52143.6	53289.1	385103	1386.46
B10	4	217319	47908.1	55295	419156	2082.32
B11	4	235208	52527.8	55295.3	438317	2144.07
B12	4	233714	54314	49409.8	420524	1595.37
C1	4	305949	82039.8	55231.6	449887	2319.61
C2	4	265075	68125.7	52580.4	403355	2033.57
C3	4	236545	59939.7	52187.2	382495	1869.15
C4	4	186437	42676.3	43675.2	311927	1596.01
C5	4	220098	53636.3	52578.1	358845	2175.91
C6	4	213912	51382.6	54506.3	369067	1754.45
C7	4	177730	40784.8	50967.4	344593	1986.67
C8	4	204749	47755.2	59535.7	405001	1494.43
C9	4	212219	48868.9	56299.5	391968	1356.35
C10	4	221012	51256.6	57547.4	416892	1824.82
C11	4	234732	55690.3	57682.5	444986	1957.72
C12	4	235310	59571.4	54593.2	454449	1666.26
D1	4	364323	96340.6	67626.6	531362	3289.33
D2	4	280223	71055.7	57095.7	420140	1065.8
D3	4	265651	67199.7	59204.8	411862	1582.03
D4	4	252869	62232.7	59867.9	401907	1638.39
D5	4	260885	64065.4	65116.7	419078	2116.65
D6	4	263750	63564.5	67453.5	427242	1879.81
D7	4	214467	48613.8	65160.5	410038	2591.54
D8	4	194373	42901	57459.5	370555	1666.67
D9	4	203107	45416	59186.2	390766	2131.53
D10	4	242687	55500.9	63669.6	440493	1649.02
D11	4	236508	58681	57879.1	432099	868.659
D12	4	280969	71238	63812.4	508848	2125.19
E1	4	358264	97888.2	68743.4	536048	2676.25
E2	4	303776	78924.8	63674.6	463140	1955.03
E3	4	287211	74631	65835.5	444480	2170.02
E4	4	288025	72136.2	72624.9	466974	2394.41
E5	4	268561	67752.9	70743.4	446155	1790.08
E6	4	274601	67894.1	75994.9	467010	2205.39
E7	4	235954	59884.7	70492.7	431020	2232.9
E8	4	260340	65495.7	75658.9	470766	2658.34
E9	4	257660	64583.4	71837.1	462707	2171.27
E10	4	185500	27809.1	63103.3	444080	1686.3
E11	4	245369	59615.4	62020.8	452895	1715.34
E12	4	278718	67623.6	65660	518584	2067.94
F1	4	344067	92496.4	69490.7	525938	3056.5
F2	4	300005	80034.7	63822.1	466148	1651.31
F3	4	299284	78869.8	69975.5	463500	2131.83
F4	4	297575	74741.6	73871.7	476071	2335.04
F5	4	300852	73344.4	79982.5	513418	1905.64
F6	4	287310	70282.4	77545.5	482054	2254.63
F7	4	244222	60661.9	66906.6	406314	2071.35
F8	4	271447	66288.4	73178.5	451052	2867.08
F9	4	292196	71042.9	77382.5	496366	2456.8
F10	4	278146	68322.6	74239.2	513998	2161.58
F11	4	275295	68507.6	70153.8	516952	666.031
F12	4	299713	75838	69375.4	560588	2099.7
G1	4	351464	93374.6	65424.4	522236	2597.77
G2	4	355188	94075.6	70137.3	518584	2283.24
G3	4	349662	90005.6	77158.3	542614	1680.69
G4	4	342063	84458.3	78068.8	518821	2668.19
G5	4	298820	71478	75595.6	495927	2300.79
G6	4	284108	71713.6	76954.4	500795	2197.08
G7	4	246347	57539.6	71096.7	451627	2339.88
G8	4	260865	61784	75695.9	490228	2503.17
G9	4	271559	64846.1	76951.1	518958	2462.17
G10	4	261627	60778.2	65745.5	463057	1552.78
G11	4	256976	62453.5	61269.7	455259	1734.57
G12	4	287772	70599.1	66372.6	548197	1679.27
H1	4	405362	101516	73567.1	609758	3058.04
H2	4	306549	76174.6	63785.4	500828	2194.58
H3	4	327483	82384	75998.8	557965	2527.2
H4	4	310620	25725.7	13837.5	11326.1	3559.32
H5	4	285104	23956	13049.2	10826.5	3217.18
H6	4	241656	20034.4	10647.8	8472.31	2357.79
H7	4	241936	54204.3	70962.3	485914	2447.1
H8	4	262715	57906.5	70819.9	483821	2760.73
H9	4	284241	62708.7	76443.1	542530	3177.69
H10	4	300012	24047.5	12278.8	10041.9	2690.72
H11	4	300463	23048.4	11738.8	9382.22	2636.26
H12	4	312229	23502.9	10123	8327.18	2154.05
A1	5	257851	69777.4	45109.8	429621	1519.7
A2	5	239387	59666.7	43000.3	370222	1606.38
A3	5	194446	48464.6	40587.3	344170	1275.12
A4	5	187503	42062.2	42866.5	346212	1522.64
A5	5	207013	46610.3	46174.2	350618	1394.95
A6	5	172391	39093.1	43887.9	339300	1415.22
A7	5	180560	42546.1	43557.4	324811	1640.89
A8	5	205753	45465.7	48436.8	361735	1998.37
A9	5	202881	45895.5	49374	381855	1954.89
A10	5	233885	53328.6	51394.3	405577	2101.45
A11	5	237413	55327.4	49616.4	429012	0
A12	5	258137	65478	51369.9	458482	1709.35
B1	5	246518	63947.9	44050.4	382302	1753.11
B2	5	233380	58652.4	44603.5	362955	1575.7
B3	5	211660	50553.5	42151	322782	1119.08
B4	5	212495	51323.2	47360.4	355320	10165.5
B5	5	204180	51175.8	47728.8	341764	2124.24
B6	5	202004	49505.6	49521.8	347141	1925.02
B7	5	191746	46195.6	47964.9	335450	1761.69
B8	5	218870	50653.5	53892.7	376279	2104.16
B9	5	222609	52491.2	53343.4	386029	1382.36
B10	5	218959	48615.9	55487.1	420756	2349.01
B11	5	236220	52793.7	55385.3	439011	2089.67
B12	5	233480	54778.9	49316.7	420094	1865.19
C1	5	306430	82004.8	55195	449129	2468.35
C2	5	266606	68469	52402	403358	1688.6
C3	5	237635	60174.2	52286.6	383087	1755.84
C4	5	187363	42931	43787	312352	1596.01
C5	5	221518	54252.1	52763.2	359752	1954.83
C6	5	215202	51801	54761.5	369382	2037.09
C7	5	178557	41181.7	51062.8	344631	1847.98
C8	5	205714	48052.2	59754.1	405600	1778.96
C9	5	213584	49414.2	56502.2	392674	1522.48
C10	5	222866	51479.5	57883	418294	1891.76
C11	5	236030	56428	57962.3	446003	2230.39
C12	5	236909	59802.9	54838.8	455228	1713.49
D1	5	364403	96198.7	67583.6	531361	3449.54
D2	5	281107	71651.8	57057.2	420618	1345.58
D3	5	267399	67896.7	59572.7	412754	2150.74
D4	5	254572	62988.6	60086.6	402904	1636.42
D5	5	262212	64659.7	65233.6	420092	2401.16
D6	5	265110	64573.3	67801.6	428403	2012.23
D7	5	215847	49138.7	65535.5	410225	2680.94
D8	5	195830	43317.4	57613	370815	1248.54
D9	5	204068	45880	59365.6	391460	2413.14
D10	5	244033	56205.1	63896.2	441494	1812.95
D11	5	237640	59393.7	57946.7	433035	651.976
D12	5	282015	71654.7	63791.1	508143	2198.33
E1	5	358939	98605.7	68868.4	535973	2428.86
E2	5	305414	79721.2	63888.9	463803	2121.27
E3	5	288386	75653.1	66274.3	445524	1741.02
E4	5	289248	72512.8	72817.1	467978	2346.16
E5	5	270068	67814.9	71044.7	446078	2012.82
E6	5	276338	68529.8	76140.9	467764	2350.92
E7	5	237171	60392	70636.2	431400	2467.12
E8	5	260914	65976.3	75903	471774	2460.97
E9	5	258607	65132.1	71988.4	463546	2403.55
E10	5	183179	26880.9	62758.2	442814	1922.33
E11	5	246727	60206.5	62364.2	454030	1576.28
E12	5	279398	68109.3	65644.3	518095	2021.64
F1	5	344669	93173.1	69693.3	524560	2983.84
F2	5	301195	80679.7	63976.5	467006	1366.92
F3	5	300869	79927.7	70126.6	463586	1898.21
F4	5	298253	75480.9	74096.7	477568	2529.37
F5	5	302037	74004.1	80321.7	513988	2143.58
F6	5	288935	70931.6	77796.4	482654	2189.56
F7	5	245336	61143.6	66863.2	406666	1940.34
F8	5	273131	66866.2	73439.5	451753	2621.16
F9	5	293379	71806.7	77680.2	496711	2589.45
F10	5	279496	68906.6	74622	515240	2279.9
F11	5	276834	68956.1	70063.4	517887	784.527
F12	5	300272	76171.5	69402.1	559494	2128.92
G1	5	351213	93509.7	65402.7	521578	2499.94
G2	5	356653	95047.4	70253.4	520591	2463.59
G3	5	351218	90785.4	77462	543938	2224.93
G4	5	344628	84914.6	78391	520124	2527.03
G5	5	300093	72194.4	75771	496856	2220.2
G6	5	285791	72692.7	77410.8	502236	2198.93
G7	5	247101	58118.1	71180.7	452914	2490.26
G8	5	261979	62557.8	75690.1	490839	2671.28
G9	5	272564	65226.4	77518.7	519237	2261.3
G10	5	263809	60973.5	65866	463550	1241.79
G11	5	258599	63177.7	61432.4	455678	2034.34
G12	5	287924	70457.5	66274.8	545723	1723.69
H1	5	406054	102415	73418.6	608615	2810
H2	5	306848	76639.5	63734.2	500916	1910.67
H3	5	328210	82713.9	76034.9	558246	2548.58
H4	5	310939	25621.7	13859.1	11442.8	3318.52
H5	5	284897	23775.7	13073.2	10874.1	3226.02
H6	5	240846	19645.7	10704.6	8699.43	2435.55
H7	5	242438	54379.6	70838.3	484363	2546.65
H8	5	264050	58238.2	70921.8	483851	2871.12
H9	5	284279	62941.3	76960.7	541700	3148.78
H10	5	300116	24088.8	12118.6	10278.6	2483.26
H11	5	300788	23532.7	11489.5	9737.83	2737.25
H12	5	311652	23268.3	10240.1	8558.39	1558.85
A1	6	257129	69979.3	45060.4	428319	1722.23
A2	6	239431	59640.3	43047.3	370545	1931.27
A3	6	194515	48868.9	40464.5	344022	1022.06
A4	6	187248	42511.6	43252.9	345836	1489.69
A5	6	207757	47191.1	46093.4	351106	1406.29
A6	6	173166	39631.5	43915.8	339107	1180.02
A7	6	180893	42891.8	43511.6	324660	1639.28
A8	6	206451	45501.1	48432.7	362283	1719.41
A9	6	202994	46204.9	49393.1	382161	1994.42
A10	6	234653	53976.2	51403.3	405314	2275.56
A11	6	237006	55595.8	49520.4	428462	0
A12	6	259151	65369.8	51320.2	456815	2317.36
B1	6	246745	64278.5	44034.1	381680	1428.06
B2	6	233758	58838.2	44626.4	363369	1751.89
B3	6	212750	51182	42311.6	322878	1473.14
B4	6	212824	51661.3	47538.2	355865	10099.1
B5	6	204919	51851	47991.4	341927	2001.22
B6	6	202716	50201.6	49529.8	347446	1941.17
B7	6	192550	46667.5	47954.5	335416	1856.5
B8	6	219621	50959.3	54241.1	376131	2344.41
B9	6	223442	52982.9	53509.5	386667	1391.39
B10	6	219486	48750.5	55576.4	421921	2120.04
B11	6	236553	53117	55517.1	439480	1972.66
B12	6	233704	55104.6	49360.4	419742	1750.99
C1	6	306492	82492.1	55400.9	448499	2744.94
C2	6	267461	69049.9	52669.7	404165	2087.44
C3	6	238139	60714	52528.7	383507	1884.13
C4	6	187487	43474.4	43955.1	312785	1715.18
C5	6	222292	54596.4	52723	359770	2001.37
C6	6	215837	52471	54877.9	369850	1764.89
C7	6	178976	41380.5	51023.1	344404	1934.15
C8	6	206175	48500.6	59912.3	405138	1869.68
C9	6	214351	49996.1	56646.3	393366	1297.66
C10	6	223808	52247.1	58115.3	418961	2010
C11	6	236443	56657.9	58188.8	446420	1693.22
C12	6	237320	60235.8	54934	455121	1624.52
D1	6	364778	96815.7	67304.3	530628	3567.86
D2	6	282765	72409.4	57252.1	421631	1099.01
D3	6	268409	68164.6	59681	413320	2052.06
D4	6	255475	63305.7	60310.1	403276	1902.9
D5	6	262983	65126	65461.5	420631	2309.35
D6	6	266720	65092.9	68048.8	428719	1983.45
D7	6	216597	49411.8	65445.2	410071	2796.86
D8	6	196288	43668.9	57782.3	370764	1347.22
D9	6	204766	46118.1	59356.4	391477	2414.83
D10	6	244901	56573.1	64210.4	441646	1872
D11	6	238710	60022.9	58220.2	433340	708.795
D12	6	282547	72333.3	63852.9	507760	2031.29
E1	6	359943	99443.5	68812.6	535368	2497.2
E2	6	306660	80155.7	64246	464673	1951.61
E3	6	289527	76003.3	66321.4	446131	1792.2
E4	6	290270	73061.8	72962.9	468928	2241.82
E5	6	271056	68735.9	71290.9	446545	1727.02
E6	6	277373	69090	76314.2	467502	2475.94
E7	6	238092	60815.2	70921.3	431986	1947.93
E8	6	262618	66441.3	76153.1	471366	2673.6
E9	6	260176	65669.8	72134.3	463788	2266.75
E10	6	181027	25849.2	62756.4	441910	1994.13
E11	6	247567	60558.9	62353.3	454666	1338.54
E12	6	279666	68479.2	65896.2	517051	2076.87
F1	6	345172	93294.1	69545.1	524336	2427.7
F2	6	302414	81486.4	64273.6	467222	1648.97
F3	6	301920	80450.9	70426.7	464560	2045.26
F4	6	299188	76122.6	74565.9	478023	2149.97
F5	6	303571	74592.8	80301.7	514392	1930.29
F6	6	290244	71611.1	78153.2	482795	2572.08
F7	6	245565	61421.5	67142.6	406112	2178.46
F8	6	274015	67720.6	73562.5	451465	2702.12
F9	6	294343	72345.6	77869.8	496930	2220.61
F10	6	279955	69369.4	74633.7	515654	2110.42
F11	6	278179	69690.7	70176.6	518676	764.097
F12	6	300562	76254.6	69388.7	559475	2039.53
G1	6	352136	94016.9	65314.4	521127	2674.53
G2	6	358406	95761.3	70632.6	519797	1924.99
G3	6	353273	91551.3	77503.6	544366	1747.62
G4	6	345216	85703	78615.6	520813	2564.54
G5	6	301355	72860	76334.4	496591	2229.79
G6	6	287678	73405.9	77984.9	504112	2193.38
G7	6	247803	58544.6	71384.6	452697	2446.36
G8	6	262932	63007.1	75898.6	491283	2811.21
G9	6	273495	65766.6	77418.7	518757	2484.49
G10	6	264128	61688.3	66004	464423	1248.33
G11	6	260025	64057.5	61875.5	455928	2019.84
G12	6	288557	70765	66158.7	545433	2187.62
H1	6	405078	102081	73343.4	606867	3197.35
H2	6	307679	77078.4	63962.4	499668	2074.38
H3	6	330025	83571	76155	557304	2820.67
H4	6	310381	25673.7	13796.3	11310	3489.72
H5	6	284512	23890.9	12993.2	10833.4	2852.08
H6	6	240781	19791.5	10721.4	8510.02	2384.61
H7	6	243078	54903.8	70947.9	483780	2631.7
H8	6	264818	58604.3	71122.8	484077	2873.91
H9	6	285690	63248.2	76635.4	541609	3336.15
H10	6	299492	23743	12251.5	10077.7	2649.97
H11	6	299230	23294.1	11470.8	9332.76	2585.77
H12	6	311192	23033.8	10347.9	8198.74	1826.33
A1	7	257309	70365	45106.8	426824	1408.97
A2	7	240371	60231.9	43162.1	370484	1791.12
A3	7	195742	49505.4	40516.3	343897	1342.8
A4	7	188107	42673.3	43078.7	346128	1576.4
A5	7	208506	47645.3	46256.7	351062	1554.53
A6	7	173464	39915.8	43891.1	338880	1224.97
A7	7	181989	43144.2	43659.5	325052	1693.17
A8	7	206408	45765.7	48484	361422	2136.19
A9	7	203868	46289.6	49661.9	381940	2011.77
A10	7	235240	54062.2	51554.8	405289	2439.61
A11	7	237687	56132.6	49599.3	427753	0
A12	7	259026	65889.1	51263.5	455106	1752.19
B1	7	246993	64347.6	44024.6	381068	1718.47
B2	7	234620	59382.8	44760.6	362716	1743.03
B3	7	213727	51617.8	42361.5	323442	1429.99
B4	7	213051	52002.8	47601.2	356179	10398.4
B5	7	205749	52150.7	47920.5	342074	2194.18
B6	7	203588	50369.3	49705.2	347367	2147.79
B7	7	193533	46767.1	47986.6	335702	1643.94
B8	7	220533	51292.3	54067.7	376742	2115.3
B9	7	224565	53453.5	53673.9	386763	1227.12
B10	7	220249	48952.3	55813.1	422953	1899.14
B11	7	236868	53611.3	55578.4	439781	2177.94
B12	7	234387	55142.4	49220.3	419037	1795.77
C1	7	306982	82965.2	55203.6	447778	2472.04
C2	7	267936	69502.2	52747.3	404146	1956.91
C3	7	238563	61279.9	52789.6	383962	1929.08
C4	7	187745	43648	44038.7	312751	1887.09
C5	7	223344	55006.4	52836.5	359855	1877.85
C6	7	216452	52625.4	54902.8	370301	1928.69
C7	7	179577	41648.4	50957	344308	1997.33
C8	7	207051	48624.3	59852.8	405583	1858.14
C9	7	214937	50309.6	56770.1	393500	1607.61
C10	7	224403	52297.1	58209.9	419856	1936.97
C11	7	237602	57147.7	58224	447175	1924.02
C12	7	237875	60966.3	54955	454541	1397.15
D1	7	365008	97087.2	67818.8	530231	3264.68
D2	7	283223	72663.7	57372.9	421054	1419.05
D3	7	269233	68921	59747.2	414061	2091.73
D4	7	256826	63904.4	60489.2	404024	1932.51
D5	7	264280	65898.7	65673.7	420817	2140.86
D6	7	267771	65716.6	68188.6	429761	1865.42
D7	7	216887	49934.9	65692	410169	2666.21
D8	7	197119	44064.2	57861.6	371182	1418.3
D9	7	205491	46460.1	59485.4	392136	2287.51
D10	7	245266	57352.3	64145.8	442955	1703.67
D11	7	239660	60144.6	58402.8	434286	499.816
D12	7	283196	72710.2	64012	507217	2436.55
E1	7	361594	100034	68909.7	534942	2644.82
E2	7	308191	80695.2	64241.6	464517	2274.98
E3	7	290742	76621.4	66548.2	446897	1925.03
E4	7	290815	73846.7	73130.7	468883	2472.95
E5	7	272407	69187.8	71418.1	446611	1931.45
E6	7	278491	69821.6	76477.7	468018	2283.53
E7	7	239134	61273.4	70839.7	430790	2082.6
E8	7	263496	66989.6	76253.9	471730	2322.61
E9	7	260546	66267.6	72319.3	463762	2498.11
E10	7	179370	24610.5	62420.2	440601	1878.36
E11	7	248639	60915.1	62641.1	455022	1792.49
E12	7	280022	68462.5	65601.2	516192	2093.93
F1	7	345449	93590.3	69360.6	524002	2727.27
F2	7	303400	82096.2	64307.8	467502	1624.39
F3	7	303221	81242.5	70524.6	464978	1932.62
F4	7	299951	76466.6	74514.2	477800	2504.7
F5	7	304631	75170.4	80625.2	515407	1908.86
F6	7	291015	72218	78085	482657	2412.04
F7	7	247106	62151.9	67279.5	406819	2077.09
F8	7	274526	67843.8	73836.5	451736	2961.2
F9	7	295666	72732.9	77935.1	496977	2370.52
F10	7	280643	69714.1	74966.5	516261	2028.35
F11	7	279520	69898.3	70342.8	519123	952.057
F12	7	301069	76610	69603.7	557807	2256.98
G1	7	351801	94300.1	65601	520325	2138.72
G2	7	360447	96421.6	70592.7	521047	2037.86
G3	7	354864	92146.6	77780.8	545285	1473.61
G4	7	346914	86492.4	78733.8	520612	2758.01
G5	7	302244	73282.1	76160	497014	2090.67
G6	7	288635	74220.4	78137.4	505992	2237.82
G7	7	248133	59007	71437.2	452983	2414.6
G8	7	263916	63137.6	75874.5	491267	2797.61
G9	7	274178	66131.7	77468.2	518960	2371.88
G10	7	265458	61965.5	65951.8	464226	1324.72
G11	7	261158	64501.2	61858.4	456488	2050.06
G12	7	288709	71199.8	66312.6	544668	2016.11
H1	7	406309	102447	73280.3	604739	3214.34
H2	7	308455	77533.4	64004.3	499022	2364.01
H3	7	330841	83895.9	76070.9	556837	3131.96
H4	7	309567	25716.3	13965.9	11457	3366.49
H5	7	284558	23918	13018.2	10800.6	3296.68
H6	7	240779	19620.1	10762.2	8551.31	2614.31
H7	7	242844	54918.3	70868.1	483808	2553.41
H8	7	264874	58841.3	70914.4	484262	2914.72
H9	7	285878	64008.4	76953.2	541673	3177.69
H10	7	299659	24007.5	12271.3	9996.3	2542.54
H11	7	300063	23752.7	11661.1	9568.05	2270.85
H12	7	310841	23272.4	10342.3	8163.87	2263.87
A1	8	257391	70709.6	44915.3	426223	1302.6
A2	8	241073	60721.4	43268.1	370014	1387.67
A3	8	196343	49565.5	40474.6	344189	1187.83
A4	8	188710	42867	43145	346267	1485.36
A5	8	209400	48046	46371	350873	1459.76
A6	8	174273	40005.2	44075.1	339188	1398.36
A7	8	182539	43688.5	43723.1	325010	1440.61
A8	8	206996	45938	48633.9	361833	2024.11
A9	8	204771	46688.5	49711.7	382049	2121.66
A10	8	235661	54391.1	51428.2	405220	2289.65
A11	8	238813	56575.2	49528.4	428312	0
A12	8	257119	65348.2	50692.8	450437	2003.68
B1	8	247202	64842.7	44167.3	381104	2060.84
B2	8	235523	59459.9	44977.3	362860	1661.03
B3	8	214320	52254.3	42545.5	323735	1229.91
B4	8	213637	52201.6	47663.3	356109	10457.9
B5	8	206164	52565	48105.4	342138	2200.92
B6	8	204154	50656.6	49720.4	347717	1915.34
B7	8	193954	47312.3	48287.3	335984	1702.82
B8	8	220865	51579.9	54319.6	376477	2078.71
B9	8	224902	53824.7	53910.7	386744	1392.21
B10	8	220444	49536.3	56035.6	424651	1888.37
B11	8	236884	53702.1	55797.2	439771	1931.61
B12	8	235019	55655.6	49334.6	419010	2043.2
C1	8	306893	82973	55276.6	447458	2592.51
C2	8	269029	70024.2	52743.1	404019	1914.44
C3	8	240017	61620.6	52784.9	384049	1678.11
C4	8	188062	43534.8	44041.6	313299	1724.95
C5	8	223800	55274.5	52990.3	359540	1960.2
C6	8	217173	53042.3	54888.4	370667	1965.63
C7	8	179842	41672.7	51201.3	344788	1980.92
C8	8	207327	49074.2	59866.6	405646	1770.71
C9	8	215781	50614.4	56910.9	393693	1270.39
C10	8	224725	52565.7	58264.1	419829	2068.25
C11	8	237988	57305.2	58417.3	446818	1967.93
C12	8	238326	61139.9	54952.8	454224	1857.38
D1	8	365690	97340.1	67880.9	530478	2918.37
D2	8	284890	73209.3	57529.3	421816	1455.28
D3	8	270435	69314.4	59918.6	414594	2020.52
D4	8	257261	64360.5	60583	404112	2019.37
D5	8	264966	66644.7	65645.2	420767	2093.45
D6	8	269104	66011.9	68314.1	429532	1694.61
D7	8	218126	50333	65604.5	410526	2600.39
D8	8	198161	44438.4	57900.8	371142	1218.43
D9	8	206777	47018.8	59762	392146	2379.42
D10	8	246847	57378.8	64486.5	442582	1993.63
D11	8	240651	60927.9	58424.1	434509	933.183
D12	8	283916	73068.9	64165.1	507571	2056
E1	8	362505	101197	69271.4	535266	2636.61
E2	8	309001	81300.6	64461.4	464726	2047.26
E3	8	291831	76883	66587.8	446585	1601.65
E4	8	292045	74356.6	73463.1	468946	2052.19
E5	8	272822	69562.5	71466.1	447276	2010.79
E6	8	279704	70255.5	76543.9	468183	2287.43
E7	8	240303	61650.3	71115	431301	2046.5
E8	8	264386	67379.1	76236.8	471918	2288.02
E9	8	261947	66735.3	72447.9	464091	2207.08
E10	8	177336	23565.5	62373.2	439455	1973.49
E11	8	250008	61683.8	62704.9	454999	1736.87
E12	8	280220	69070.9	65878.8	516851	2220.64
F1	8	346357	94182.6	69921.6	524332	2768.8
F2	8	304442	82482.5	64454	467812	1847.92
F3	8	304176	81919.3	70735.2	464439	1981.64
F4	8	300796	76960.4	74786.8	478369	2212.69
F5	8	305684	75590.9	80669.3	515367	2024.61
F6	8	292364	72920.4	78515.2	483684	2374.22
F7	8	247463	62595.3	67379.5	406473	2092.39
F8	8	275226	68333.6	73950.4	452093	2729.44
F9	8	296540	73031	77787.3	496881	2476.21
F10	8	281756	69956.6	74954.8	516996	1778.94
F11	8	280129	70565.1	70404	519269	650.708
F12	8	301387	76819.3	69554	558343	2335.19
G1	8	351616	94481.3	65470.9	518716	2064.97
G2	8	361147	97203.1	70960.8	521701	2188.77
G3	8	355069	92619.2	78200.5	545645	1977.44
G4	8	348397	87155.8	78972.2	521254	2445.1
G5	8	303254	73678.8	76614.7	497776	2183.74
G6	8	289973	75247.4	78631.2	507720	2308.18
G7	8	249101	59499.2	71615.3	453081	2410.87
G8	8	264602	63355.2	76143.7	492499	2449.73
G9	8	274881	66755.9	77693.4	519409	2543.33
G10	8	266556	62389.9	66278.7	464721	1176.31
G11	8	262173	64970.4	62060.3	456866	1788.96
G12	8	289080	71601.8	66220	544688	1739.73
H1	8	406161	103091	73138.6	604040	3280.6
H2	8	309694	77781.9	63875.1	498867	2113.3
H3	8	331147	84414.1	76661	557225	3295.93
H4	8	309417	25758.8	13851.6	11484.5	3323.22
H5	8	283691	23902.9	12959.2	11000.3	3112.17
H6	8	240594	19803.8	10782.6	8547.72	2305.06
H7	8	243094	55121.6	70888.3	482744	2642.33
H8	8	266041	59108	71097.8	483934	2590.97
H9	8	286547	64376.7	76820.4	541126	3131.65
H10	8	299912	24156	12247.7	10263.8	2973.49
H11	8	299501	23557	11643.7	9733.82	2567.16
H12	8	310778	23511	10286.6	8661.15	1711.19
A1	9	257150	70455.2	44837.5	425058	1190.41
A2	9	241108	60832.6	43257.2	369937	1930.21
A3	9	196939	49798.7	40664.4	343781	1417.35
A4	9	188606	43182.3	43099	345420	1642.3
A5	9	209816	48329.1	46467.4	351290	1537.52
A6	9	174415	40301.9	44084.7	339585	1273.14
A7	9	183466	43993.1	43679.6	325409	1589.41
A8	9	208136	46303.9	48637.2	362061	2328.8
A9	9	204704	46528.6	49671.5	382252	2062.86
A10	9	236340	54405.2	51325.5	405406	2183.97
A11	9	238396	56795.9	49609.6	428168	0
A12	9	259265	66604.6	51304.6	454364	1379.09
B1	9	247651	65046.9	44180.8	380165	2071.49
B2	9	236024	59707.6	44842	362681	1902.59
B3	9	215179	52372.3	42611.6	323455	1207.35
B4	9	214670	52368.1	47651.2	356037	10583.8
B5	9	207034	52737.5	48013.4	342329	2173.11
B6	9	204355	50666.7	49861.3	348403	1862.87
B7	9	195121	47643.1	48206.5	336116	1682.94
B8	9	221924	51809.8	54413	376610	2326.12
B9	9	226031	54308.3	53976.5	387220	1625.48
B10	9	221891	49667.3	56300.9	425485	1843.47
B11	9	237878	54065	55588.7	439658	1802.29
B12	9	235070	55863.3	49438.9	418775	1758.83
C1	9	307967	83240	55258.4	447085	2319.61
C2	9	270183	69968.6	52961.5	403739	2291.52
C3	9	240740	61964	52912.5	384134	1723.06
C4	9	188835	43840.4	44231.1	313323	1595.04
C5	9	224217	55573.8	53129.8	359897	2052.39
C6	9	217528	53250.4	55111.5	370683	1787.37
C7	9	180828	42038.5	51144.8	344673	2121.24
C8	9	208273	49093.1	60015	405448	1773.19
C9	9	216734	50788.3	56947.6	393867	1376.18
C10	9	225484	52614	58119.6	418605	1977.83
C11	9	238826	57974.7	58386.1	447060	2027.16
C12	9	238516	61077.4	55249.3	454719	1546.53
D1	9	365786	97448.7	67910.7	530487	3347.25
D2	9	286072	73640.6	57540.4	422297	1165.43
D3	9	270757	69370.8	60130.1	414559	2001.19
D4	9	258576	64806.6	60623.7	404633	2294.73
D5	9	266522	66742.2	65740.6	421685	2027.87
D6	9	270036	66649.1	68499.6	430101	1793.45
D7	9	219048	50697.7	66087.3	410545	2666.21
D8	9	198871	44567.1	58010.1	371331	1450.08
D9	9	207469	47061.7	59705.9	392114	2435.07
D10	9	247093	57471.5	64422.8	442977	1840.28
D11	9	241733	61244	58633.7	434641	720.352
D12	9	284832	73690.6	64162	507242	2232.93
E1	9	363468	101200	69336.6	533894	2653.02
E2	9	310034	81782	64548.5	465612	1805.87
E3	9	292978	77795.4	66721.6	447882	1865.15
E4	9	293124	74597.8	73719.4	469023	2148.69
E5	9	273757	69760.8	71467.1	446836	1938.57
E6	9	280393	70474.8	76786.2	468614	2332.36
E7	9	240222	62063.2	71193.6	431347	2117.74
E8	9	265804	67783.2	76213.6	471944	2568.81
E9	9	263058	67286.7	72491.6	464393	2262.16
E10	9	174989	22650.6	62105.2	438074	1880.15
E11	9	250845	61971.4	62800.5	454994	1532.32
E12	9	281386	69311	65907.8	516098	2044.38
F1	9	346702	94505.8	69947.3	522789	2705.03
F2	9	305332	83357.1	64787.6	468035	1543.64
F3	9	306399	82112	70804.4	465013	2013.97
F4	9	302006	77284.7	74868.9	478244	2596.21
F5	9	306822	75943.5	80842.6	515317	1824.19
F6	9	293475	73113.7	78415.5	483214	2468.31
F7	9	248371	62778.1	67379.5	406195	1869.57
F8	9	276157	68563.4	74008.4	451987	2515.91
F9	9	297329	73587.9	78022.9	497174	2612.1
F10	9	282640	70235.4	75014.4	517533	1933.49
F11	9	281201	70671.6	70485	518746	1011.3
F12	9	301974	76918.6	69610	558506	2176.19
G1	9	351695	94398.9	65505	519363	2962
G2	9	362400	97903	70970.8	522668	2023.14
G3	9	356337	93424.3	78137.5	546309	1844.85
G4	9	348621	87708.7	79067.8	521332	2730.37
G5	9	303922	74113.1	76644.3	497491	2167.43
G6	9	292006	75827.2	79082.1	509658	2199.86
G7	9	249673	59861.8	71688.2	453568	2420.21
G8	9	265269	64020.2	76295.3	491796	2818.01
G9	9	275446	66820.6	77765.1	518980	2617.38
G10	9	266460	62801.3	66331.9	465045	1224.33
G11	9	262746	65147.7	61879.2	457385	2102.03
G12	9	289512	72195.3	66289.1	544035	2227.1
H1	9	407115	103734	73072	602799	2663.89
H2	9	310428	78105.8	63988	498321	1851.14
H3	9	332876	85142.3	76555.2	557157	2838.49
H4	9	309926	25726.7	13839.4	11598.4	3530.16
H5	9	283433	23613.5	13116.1	10725.1	3224.05
H6	9	239686	19716.4	10717.9	8346.64	2555.32
H7	9	243263	55232.4	70711.4	482259	2482.86
H8	9	266497	59337.5	71154.3	483998	2821.03
H9	9	287159	64415.5	76946.9	540819	3078.12
H10	9	298611	23764.9	12333.4	10182.4	2615.39
H11	9	299516	23698.4	11512.3	9416.98	2738.57
H12	9	311659	23425.4	10070.9	8229.93	2639.42
A1	10	257686	70785.1	44879.4	423960	1187.5
A2	10	242387	61116.9	43315.2	370163	1875
A3	10	197793	50080.7	40627.9	343742	1013.23
A4	10	189040	43356.4	43252	345630	1463.68
A5	10	210741	48843.4	46448.6	350952	1549.67
A6	10	174710	40507	44175.5	339120	1408
A7	10	183802	44386.3	43809.1	324975	1596.65
A8	10	208603	46522.4	48779.7	362111	1625.6
A9	10	205535	46979.8	49738.5	382186	2062.86
A10	10	236332	54700.7	51548.9	405862	1995.77
A11	10	239015	57024.9	49698.7	427797	0
A12	10	259949	66596.9	51426.7	452400	1888.99
B1	10	247238	65094	44020.5	380272	1452.04
B2	10	236859	59913.3	44946.3	362072	2103.15
B3	10	215924	52730.4	42824.1	323774	1448.62
B4	10	214770	52531.2	47739.2	356173	10441.5
B5	10	207229	53024	48098.7	342048	2273.39
B6	10	205056	51110.9	49855.7	348397	2176.04
B7	10	195484	47786.4	48308.3	336145	2012.49
B8	10	222301	52031.3	54447.5	376225	2117.69
B9	10	226546	54423.9	53941.1	387035	1663.26
B10	10	222082	49854.8	56490.2	427016	1982.65
B11	10	238087	54332	55784.9	439780	2006.53
B12	10	235735	56181.9	49329	418529	2052.15
C1	10	307581	83682	55270.5	446809	2484.33
C2	10	270830	70787.1	52834.5	403903	1678.24
C3	10	241278	62139	52875.9	384532	1903.8
C4	10	188796	43877.2	44085.4	312678	1549.13
C5	10	224717	55998.5	52941.1	359679	2051.49
C6	10	217789	53269	55408.5	370471	1814.67
C7	10	181344	42049.1	51351.7	344027	1843.06
C8	10	208763	49341.4	60063.9	405092	1578.55
C9	10	217241	51327.3	57230.1	394091	1539.01
C10	10	226060	53016.4	58525.7	420816	1932.63
C11	10	238642	57987.8	58452.5	446674	2199.75
C12	10	239303	61548.5	55255.9	455004	1363.1
D1	10	366701	98016.4	67943	530030	2856.75
D2	10	286166	73750.7	57571.9	421890	1405.97
D3	10	272000	69913.6	60182.3	415192	2204.66
D4	10	258567	65171.8	60907.2	404530	1803.22
D5	10	267100	67300.5	65924.3	421845	2087.39
D6	10	271116	67258.5	68477.7	430103	2171.52
D7	10	219448	51258.7	65873.6	410809	2874.47
D8	10	199527	44896	58040.1	371498	1488.55
D9	10	207490	47732.4	59855	392080	2066.6
D10	10	248047	57823.6	64629	443132	1726.58
D11	10	242707	61680.8	58723.6	434697	1037.19
D12	10	285169	73853.8	64209.7	506839	2252.7
E1	10	365179	101901	69441.7	534383	2391.95
E2	10	310982	82503.5	64653.4	465815	2018.79
E3	10	293952	78173	67044.8	448125	1788.93
E4	10	293475	75073.9	73972.3	469148	2176.74
E5	10	274710	70180.3	71654.3	447404	1788.04
E6	10	281416	71136.4	76960.4	467968	2352.87
E7	10	241656	62217.2	70990.1	430634	2250.46
E8	10	267106	68189.3	76349.8	471869	2493.52
E9	10	263553	67607.9	72528.1	464352	2356.72
E10	10	174267	22317.9	61810.7	436682	1897.21
E11	10	251705	62457.2	62962.7	454696	1739.56
E12	10	281728	69726.9	66017.2	515739	1946.1
F1	10	348587	94524.9	69737.1	523094	2801.42
F2	10	306550	83550.3	64804.1	467824	1652.48
F3	10	306804	82732	70931	464916	2025.45
F4	10	302917	77914.6	74993.5	478311	2402.9
F5	10	308146	76507.9	81021.1	515092	1918.5
F6	10	294985	73583	78604.4	483646	2260.79
F7	10	249098	63176.7	67235.1	406412	1838.97
F8	10	276879	68990.6	74002.4	451743	2625.21
F9	10	297682	73787.4	78305.7	496873	2367.29
F10	10	283139	70642.8	75236.6	517288	1913.24
F11	10	281149	70914.6	70731.1	519797	740.602
F12	10	302494	77559.8	69753.9	558630	2256.12
G1	10	351979	94921	65807.1	518764	2545.09
G2	10	364354	97876.2	71006.9	521794	2105.34
G3	10	357595	93627.8	78397.1	545503	1804.44
G4	10	350222	88066.3	79352.5	521042	2731.36
G5	10	305121	74875.5	76745.3	497537	2410.17
G6	10	293238	76318.1	79286.5	511364	2344.29
G7	10	250474	60525.8	71808.2	452880	2035.36
G8	10	265992	63969.1	76198.8	492417	2749.99
G9	10	276083	67264.7	77886.3	519540	2591.01
G10	10	267764	62806.8	66480.7	465267	1386.92
G11	10	263031	65803	62127.6	457282	2098.41
G12	10	290386	72314	66583.9	542565	1807.59
H1	10	406613	104303	73188.1	601071	3307.78
H2	10	311263	78722.7	64088.1	497838	2270.14
H3	10	334340	85693.4	76715.1	557405	2687.6
H4	10	309149	25574.4	13852.5	11425.7	3438.92
H5	10	283448	23959	12985.2	11214	3534.19
H6	10	239563	19815.3	10803	8335.87	2489.18
H7	10	244002	55470.4	70884.5	482001	2565.01
H8	10	267029	59685.1	71209.9	483844	2963.89
H9	10	288181	65021.8	77038.3	540944	3148.78
H10	10	299422	23944.3	12381.8	10419.1	2562.29
H11	10	299611	23618.4	11654.4	9548	2559.19
H12	10	310428	23090.9	10281	8090.47	1923.76
A1	11	256988	70916.4	44710.3	422503	1462.88
A2	11	242289	61453.9	43404.8	369909	1862.26
A3	11	197451	50185.4	40703	343987	924.954
A4	11	189079	43427.5	43082.2	345559	1413.39
A5	11	211580	49154	46509	351289	1604.76
A6	11	175142	40684.2	44247.9	339091	1456.16
A7	11	184261	44178.2	43927.3	324823	1755.11
A8	11	208884	46991.4	48786.3	361143	2080.56
A9	11	205870	47016	49996.8	381994	1901.88
A10	11	236776	54930.4	51472.1	405083	2292.67
A11	11	238958	56727.9	49823.3	427813	0
A12	11	257219	66035.9	50748.2	448031	1977.43
B1	11	247186	64933.8	44278.7	379376	1982.24
B2	11	237195	60584.1	45011.7	362532	2042.21
B3	11	216320	52944.3	42960.3	323627	1062.19
B4	11	214731	52693.4	47854.9	355915	10524.3
B5	11	207764	53164.3	48145.1	342201	2034.92
B6	11	205293	51191.2	49894.9	347988	1952.47
B7	11	196334	47941.9	48332.2	335940	1702.82
B8	11	222779	52288.5	54669.6	376554	2105.75
B9	11	226719	54557.4	54042.3	387278	1721.58
B10	11	222832	50216.3	56538.5	427603	1993.43
B11	11	238019	54385.2	55732.8	440277	2425.29
B12	11	235692	56145.3	49570.1	418783	2081.26
C1	11	307706	83671.7	55350.9	445915	2555.63
C2	11	270239	71046.5	53087.4	402992	2042.89
C3	11	241163	62272.1	52980.1	384081	1508.62
C4	11	188651	43877.2	44136.9	313383	1702.48
C5	11	225339	55879.1	53156.6	359611	2351.34
C6	11	218377	53491.1	55218.3	370892	1870.88
C7	11	181790	42315.5	51487.8	344302	1916.09
C8	11	209690	49739.3	60084.3	405117	1597.52
C9	11	217541	51337.6	57210.5	394325	1462.97
C10	11	225214	52818.2	58220.2	417390	1876.12
C11	11	239577	58475.6	58692.1	446964	2366.21
C12	11	239940	61791.6	55160.8	454815	1463.06
D1	11	366530	98091.6	67820	529335	3122.95
D2	11	286597	74140.9	57568.9	421900	1105.05
D3	11	272391	70179.5	60289.6	414988	2161.93
D4	11	259799	65323.5	60884	404868	1853.55
D5	11	267778	67345.6	65771	421596	2513.15
D6	11	271611	67675.8	68473.9	430441	1864.46
D7	11	220153	51368.9	66232.1	410187	2733.01
D8	11	199971	45357.7	58119.3	371275	1429.17
D9	11	208071	47899.7	59736.9	391951	2142.49
D10	11	248515	58138.6	64461.8	443486	1869.36
D11	11	243425	62034.2	58871.4	435234	1180.68
D12	11	285956	74405.8	64426.5	506398	2019.42
E1	11	365673	102305	69435	533490	3030.26
E2	11	312248	82432	64798.5	465611	2074.58
E3	11	294645	78502.1	66845.8	447195	1473.17
E4	11	294313	75178.6	73614.5	468886	2257.52
E5	11	275206	70547.4	71572.2	446745	2025.03
E6	11	282020	71298.5	77053.8	468374	2682.02
E7	11	241800	62652.7	71046.1	431018	2263.15
E8	11	267672	68743.6	76664.4	471850	2495.56
E9	11	264058	67750.8	72790.6	464412	2447.61
E10	11	172831	21620.7	61664.3	435380	2010.28
E11	11	251770	62752.3	62975.4	454668	1853.5
E12	11	282610	70140.1	66020.5	514862	2243.38
F1	11	347626	94805.2	69924.6	522510	3161.8
F2	11	307169	83851.6	64880.8	467399	1602.15
F3	11	307931	83205.7	71023.6	464783	1874.22
F4	11	303364	78432.1	75015.8	478752	2305.22
F5	11	308134	77043	80981.2	515061	1876.7
F6	11	295319	74071.8	78617.5	483480	2097.23
F7	11	249866	63377.8	67616.4	406363	2110.56
F8	11	277752	69065.9	74074.4	451351	2609.01
F9	11	299062	74172.5	78239.3	496558	2513.96
F10	11	282942	70706.7	75303.6	517454	2176.51
F11	11	282485	71367.5	70796.5	519421	848.883
F12	11	303101	77797.7	69759.2	557039	2144.39
G1	11	351189	94766.2	65638.2	519133	2516.49
G2	11	365217	98532.6	71301.4	522414	2241.53
G3	11	358006	94368.4	78317.7	546728	2088.56
G4	11	351218	88331.1	79315.1	521614	2597.11
G5	11	306268	74802.2	76948.4	497428	2323.82
G6	11	294794	77223.3	79649.8	513661	2541.5
G7	11	250993	60289.1	71785.1	453110	2265.15
G8	11	266249	64497.9	76425.6	492259	2692.66
G9	11	276318	67373.9	77972.2	519253	2712.75
G10	11	267839	63182.2	66456.8	465224	1210.14
G11	11	264698	65922.9	62336.9	457129	2154.01
G12	11	290809	72468.5	66201.7	542831	2452.89
H1	11	406613	104453	73370.8	601361	3396.12
H2	11	311755	78918.1	64059	498611	1930.13
H3	11	334350	86110.6	76705.4	557811	2903.84
H4	11	309528	25737.1	13900.3	11413.4	3839.63
H5	11	283198	23966	13000.2	10682.4	3209.33
H6	11	240037	20160.7	10714.3	8820.61	2069.1
H7	11	243715	55552.3	70776.8	482117	2333.06
H8	11	267333	59777.1	71200.6	483862	2549.22
H9	11	288754	65097.1	76942.6	540378	3174.48
H10	11	299192	23963.7	12216.7	10399.4	2774.69
H11	11	298842	23514.1	11627.6	9374.2	2943.2
H12	11	310586	23125.6	10277.3	8162.04	1902.51
A1	12	257326	70731	44693.9	422085	1359.43
A2	12	243318	61536.5	43401.5	369898	1534.19
A3	12	198281	50708.9	40586.3	343939	1342.8
A4	12	189189	43642.4	43326.3	345283	1610.22
A5	12	211552	49244.9	46505	351270	1586.94
A6	12	175668	40874.5	44106.2	339390	1504.32
A7	12	184667	44473.3	43990.8	324619	1861.28
A8	12	209530	47033.4	48814.5	361842	2102.98
A9	12	205975	47168.3	49867.6	382151	1993.45
A10	12	237254	55054.8	51645.6	405100	2603.66
A11	12	239561	57265.9	49792.5	427774	0
A12	12	259973	66904.4	51172.6	450907	2372.64
B1	12	246471	64998.5	44343.9	379574	2148.76
B2	12	237521	61003.7	45080.5	362181	1996.78
B3	12	217022	53391.2	42929.8	323798	1116.14
B4	12	214965	52728.3	47776.4	356016	10467.4
B5	12	208405	53523.4	48227.9	342246	2141.94
B6	12	206003	51456.2	50150.3	348210	2198.64
B7	12	196651	48191.3	48376.3	336289	1737.22
B8	12	222964	52415.2	54521.3	376780	2251.34
B9	12	227356	54714.6	54057.9	387056	1620.55
B10	12	223811	50489	56677.8	429210	2155.95
B11	12	238381	54549.9	55819.7	439693	1979.85
B12	12	236111	56633.8	49394.1	417935	1809.21
C1	12	307830	84002.2	55360.7	445941	2672.41
C2	12	271497	71135.8	53068.6	403054	1821.2
C3	12	241305	62549.4	52899.4	384322	1783
C4	12	189034	43915	44305	313187	1668.29
C5	12	225412	56008.9	53212.9	359944	2181.28
C6	12	218641	53859	55460.7	371014	1975.26
C7	12	181819	42608.4	51463.1	344301	2180.33
C8	12	210068	49847.2	60079.4	404962	1870.51
C9	12	218102	51905.1	57204.8	394236	1483.63
C10	12	226593	53378.2	58543.7	420256	2033.47
C11	12	239956	58627.1	58618.6	447135	2428.51
C12	12	240126	61837.9	55423	454045	1681.64
D1	12	365924	98273	67784.2	529236	3217.85
D2	12	286768	74549.6	57790.2	421882	1403.96
D3	12	272922	70499.9	60429.9	414950	1853.67
D4	12	260860	65627.9	60929.5	404391	1952.25
D5	12	268165	67729.2	66193.5	421460	2227.63
D6	12	272424	67750.3	68692.6	431117	1851.03
D7	12	220884	51588.3	66126.2	410119	2577.79
D8	12	200417	45532.6	58140.2	371186	1416.63
D9	12	208422	48026.6	59905.3	392037	2344.85
D10	12	248555	58062.7	64746.8	443251	2124.07
D11	12	243792	62310	58963.2	435090	830.138
D12	12	286468	74720.4	64200.5	506743	2289.27
E1	12	366124	102758	69514.8	534670	2657.12
E2	12	312685	83003.9	65012.8	465169	2389.98
E3	12	295559	78823.8	67085.5	447771	1644.12
E4	12	294635	75553.1	73875.1	469127	2615.45
E5	12	275818	70981.1	71838.5	446373	2150.13
E6	12	282174	71703.9	77163.8	468379	2257.16
E7	12	242165	62861.4	71231	430773	1850.34
E8	12	267789	68877	76420.4	471788	2370.43
E9	12	264795	67907.3	72721.3	464142	2442.11
E10	12	171338	21102.1	61588	434032	2228.36
E11	12	252403	63474.9	63072.9	454600	1786.21
E12	12	282198	70043	66013.8	514938	1858.38
F1	12	348471	95365.6	69992.7	522210	2765.83
F2	12	307710	83970.6	64779.4	467833	1940.37
F3	12	307755	83485.7	71073.6	465158	2073.42
F4	12	303756	78390.7	75046.2	478375	2338.13
F5	12	309066	77359.1	81072.6	515231	2230.4
F6	12	295940	74361.3	78707.5	483670	2583.51
F7	12	250289	63744.4	67551.3	406206	2280.78
F8	12	277925	69351.3	74028.4	451553	2889.35
F9	12	299249	74377.2	78361.4	496312	2353.27
F10	12	283425	70769.4	75286.6	517452	1859.94
F11	12	282745	71686.9	70678.1	519597	752.86
F12	12	302923	77734.6	69651.7	558020	2312.85
G1	12	351267	94891.3	65387.2	518843	2430.7
G2	12	365096	98818.7	71395	522683	2161.78
G3	12	359045	94599.7	78414.7	546628	2112.55
G4	12	351342	88620.2	79403.8	521180	2497.41
G5	12	306485	75581.5	76705.3	497352	2059.97
G6	12	296203	77880.5	79895.3	515510	2357.25
G7	12	250786	60861.4	71965.9	453002	2320.26
G8	12	266782	64398.6	76574.2	492001	2658.65
G9	12	276430	67581.3	77968.1	519254	2552.46
G10	12	268139	63259.6	66545.9	464526	1120.66
G11	12	264639	66079.7	62510.7	456660	2272.47
G12	12	290730	72778.9	66283.9	542965	1770.57
H1	12	406981	104638	73155.6	600285	3068.23
H2	12	312692	79450.9	64092.8	497580	1887.78
H3	12	335632	86467.1	76727.1	557556	2779.08
H4	12	308958	25769.2	13964	11510.2	3537.69
H5	12	283176	23907	13011.2	10868.2	3145.54
H6	12	239586	19903.7	10788	8708.4	2321.15
H7	12	244256	55852.9	70892.1	481833	2375.58
H8	12	267930	60088.4	71491.5	483359	3114.17
H9	12	289221	65219.9	77099.9	540665	3122.02
H10	12	298486	23878.5	12415.4	10200.9	2966.09
H11	12	298830	23485.5	11464.1	9592.11	2549.89
H12	12	310461	23396.8	10346.1	8340.03	1978.68
A1	13	257261	70980.4	44720.8	421708	1481.82
A2	13	243439	61973.2	43373.1	370091	1670.09
A3	13	198538	51006.4	40655.3	343979	1251.58
A4	13	189857	43741	43277.6	345003	1796.65
A5	13	212403	49446.9	46526.2	350767	1667.94
A6	13	176282	41009.7	44260.7	339013	1227.38
A7	13	185060	44600.7	43960.2	324741	1578.95
A8	13	209791	47081.2	48794.6	361947	2336.28
A9	13	206579	47377.7	49904	382126	2177.57
A10	13	236832	55342.2	51616.6	405022	2222.22
A11	13	239745	57425.7	49855.3	428081	0
A12	13	260218	66867.3	51111.6	450681	2321.51
B1	13	247403	65160.1	44092.5	379469	1731.79
B2	13	238006	60968.6	45011.7	362613	1932.51
B3	13	217295	53647.4	42843.4	323685	1361.33
B4	13	215430	53067.2	47839.4	356282	10755.4
B5	13	208782	53661.2	48296.3	342558	2002.06
B6	13	205899	51487.1	49979.8	348503	2038.83
B7	13	196526	48471.2	48442.1	336092	1846.56
B8	13	223581	52710.3	54700.2	376910	2063.59
B9	13	227776	55182.7	54266.7	387354	1578.66
B10	13	223938	50716.9	56944.9	429968	2051.79
B11	13	239655	54576	55901.5	440321	2023.98
B12	13	236333	56891.1	49685.6	417830	2320.85
C1	13	307971	84231.6	55335.1	444929	2013.53
C2	13	271392	71509.6	53112.6	403340	2181.71
C3	13	242348	62613.7	53202.5	384274	2071.42
C4	13	189034	44231	44222.4	313249	1853.88
C5	13	226096	56391.2	53196.8	359602	2092.67
C6	13	219057	53924.2	55463.9	371123	1935.11
C7	13	182445	42371.6	51516.4	344192	2154.07
C8	13	210139	49891.4	60258.8	404602	1621.44
C9	13	218805	52004.4	57186.1	394000	1388.58
C10	13	227011	53230.8	58595.4	420095	2269.07
C11	13	240393	58553.9	58609.6	446940	2162.99
C12	13	240074	62039.3	55334.5	454662	1831.02
D1	13	366692	98213.8	67978.8	529336	3142.67
D2	13	287685	74474.4	57823.7	421956	1450.25
D3	13	273441	70677.8	60531.2	415109	1882.15
D4	13	260768	66224.8	61031.1	404952	2113.13
D5	13	269344	68113.7	66110	421771	2295.22
D6	13	272973	67939.7	69026.4	431108	1826.08
D7	13	221163	51745.7	66258.3	409816	2846.97
D8	13	201287	45697.1	58173.6	370947	1277.81
D9	13	209232	48189	59923.8	392237	2319.55
D10	13	248818	58575.5	64668.9	443662	1733.63
D11	13	243757	62503.4	59023.1	435167	906.218
D12	13	286237	74704.3	64297.8	506665	2313.98
E1	13	366652	103211	69306	533828	2542.3
E2	13	313466	83465.2	64917.9	465789	1966.41
E3	13	296304	78995.8	67141.1	447910	1890.19
E4	13	295476	75877.8	73792.3	469165	2127.37
E5	13	276858	70966.9	71899.5	446372	1887.72
E6	13	283357	71891.9	77318.6	468059	2313.8
E7	13	242595	62919.1	71288	430401	1947.93
E8	13	269083	69128.1	76792.5	471668	2554.57
E9	13	265241	68424.1	72829.8	463987	2126.28
E10	13	170077	20727	61609.3	433236	1994.13
E11	13	253264	63584.9	63047.4	454132	1595.12
E12	13	282965	70477.5	65982.4	514104	1868.13
F1	13	348029	95037.6	69906.5	522910	2807.36
F2	13	308683	84304.7	64861.9	467950	1619.71
F3	13	308756	83880.4	71189.6	465652	2080.73
F4	13	304444	78464.6	75214.5	478548	2709.31
F5	13	309574	77424	81157.6	514937	1732.01
F6	13	296798	74447.5	78862.3	483505	2417.31
F7	13	250751	63785.5	67724	405852	2295.12
F8	13	278991	69671	74256.4	451623	2781.06
F9	13	299446	74690.2	78383.8	496826	2507.49
F10	13	283812	70985.4	75397.2	517923	1923.9
F11	13	283173	71822.4	70939.8	520031	757.968
F12	13	303266	77955.3	69835.6	557109	2658.36
G1	13	351252	94665.7	65845.8	517921	2990.59
G2	13	365970	98774	71555.9	522940	2328.64
G3	13	359638	94838.5	78737.3	547827	1712.26
G4	13	352660	88917.2	79459.9	521691	2499.39
G5	13	307020	75316.4	76744.4	498057	2675.94
G6	13	297625	78172.1	80564.4	517458	2362.81
G7	13	252082	60669.7	71819.2	453523	2311.85
G8	13	266682	64396.7	76553	492761	2542.04
G9	13	277353	67597.5	77952	519614	2324.2
G10	13	268859	63521.5	66771.8	464615	983.171
G11	13	265609	66760.6	62652.7	457208	1990.83
G12	13	291558	73082.1	66263	542416	1800.19
H1	13	406691	104709	72969.6	599416	3469.17
H2	13	313485	79988.7	64187.1	497641	2094.98
H3	13	336273	87264.7	76969.8	557985	2809.97
H4	13	308838	25600.9	13787.9	11531	3540.51
H5	13	282797	23812.8	13007.2	10630.7	3130.82
H6	13	239460	19813.5	10901.5	8332.28	2420.36
H7	13	243862	55974.3	70866.2	481432	2264.44
H8	13	267616	60132	71436.9	484049	2564.07
H9	13	288850	65645.2	77096.7	540998	3316.87
H10	13	298559	24010.1	12298.6	10406.8	2859.89
H11	13	298518	23619.8	11708	9693.72	2685.42
H12	13	310054	23378.4	10427.9	8079.46	2393.19
A1	14	257904	71198.7	44632.6	421018	1643.55
A2	14	243837	62110.8	43407	369489	1859.07
A3	14	199151	50696.4	40955.7	343882	911.222
A4	14	189794	43911.6	43310.4	345156	1575.54
A5	14	212635	49648	46710.7	350882	1540.76
A6	14	176332	41193.8	44356.3	339128	1536.43
A7	14	185163	45028.7	44043	324858	1562.06
A8	14	209962	47172.7	49130.9	361782	2063.96
A9	14	205988	47397.7	49778.7	382266	2341.44
A10	14	237101	55176.3	51656.5	405231	2513.08
A11	14	239658	57390	49779.9	427467	0
A12	14	259309	66994	51030.7	450489	1782.59
B1	14	247362	64745.7	44380.6	379030	1751.78
B2	14	238475	61238.6	45091.9	362542	2165.21
B3	14	218043	53802.7	43144.3	324454	1293.66
B4	14	216040	53102.9	47775.5	355753	10714.9
B5	14	209452	53837	48316.5	342121	1938.87
B6	14	206234	51523.4	50061.5	348291	2153.44
B7	14	197813	48666.1	48523.7	336083	1974.26
B8	14	224162	52658	54617.8	376609	2134.39
B9	14	227904	55374	54279	387237	1568.81
B10	14	224370	50784.1	56992.3	431056	2330.15
B11	14	239612	54796	55911.7	439871	2352.42
B12	14	236361	56782.5	49517.4	418191	2005.13
C1	14	308272	84112.4	55332.7	445106	2601.11
C2	14	271719	71457.3	53252.3	403327	1953.8
C3	14	242506	63138.6	53113.3	384219	1877.58
C4	14	189393	44552.7	44306.9	313307	1712.25
C5	14	226002	56521.8	53362.2	359407	2062.23
C6	14	219020	53849.7	55457.5	371243	1925.48
C7	14	182670	42589.4	51489.4	344624	1989.13
C8	14	210756	50109.6	60108.8	405248	1807
C9	14	219146	52006.7	57441.8	394260	1221.62
C10	14	227261	53115.5	58568.7	419394	1980.44
C11	14	240382	58728.5	58613.6	447653	1998.57
C12	14	241163	62011.6	55186.2	455002	1770.6
D1	14	366471	97897.9	68143.5	529749	3244.96
D2	14	287978	75061.2	57816.6	421972	1580.08
D3	14	273624	70802.4	60535.2	415650	1866.89
D4	14	261193	66313.8	60945	405368	1753.87
D5	14	269698	68278.3	66017.6	421862	2447.57
D6	14	274000	68275.3	68953.2	430967	1757.95
D7	14	221528	51964.2	66225.3	410182	2370.51
D8	14	201731	45854.2	58242	371117	1503.6
D9	14	209740	48496.3	59998.4	392043	2466.26
D10	14	249180	58440.5	64783.9	444125	1747.73
D11	14	245015	62928.5	59145.8	435442	928.368
D12	14	287000	75172.4	64568.4	506766	2114.32
E1	14	367688	103419	69568	533668	2859.41
E2	14	313872	83563.5	65095.4	465769	1828.64
E3	14	296628	79533.7	67159.3	447567	1700.74
E4	14	296205	76053.5	74120.3	469260	1982.63
E5	14	276428	71411.1	71913.5	446853	1962.98
E6	14	283718	72218	77137.5	468409	2345.06
E7	14	243158	63205.3	71424.7	430876	2062.11
E8	14	269496	69347.8	76878.2	472034	2335.84
E9	14	265850	68662.5	72797.9	463854	2396.2
E10	14	168954	20199.6	61378.6	431944	1833.49
E11	14	253317	63648.8	63181.3	455114	1700.08
E12	14	283138	70689.4	66018.8	513797	1881.94
F1	14	348445	95413.4	70149.9	522291	2761.38
F2	14	309356	84694.6	65097.7	467744	1522.57
F3	14	309744	84120.4	71150.3	464838	2195.45
F4	14	305199	79067.8	75138.5	477891	2548.91
F5	14	310186	77612.5	81383.4	514783	2061.05
F6	14	297601	74818	78871.9	483710	2390.93
F7	14	250896	63927.2	67587.2	405912	2164.11
F8	14	279307	69526.3	74094.4	451035	2839.76
F9	14	299988	74899.2	78308.9	496304	2300.42
F10	14	284127	70858.8	75396.1	517679	1559.37
F11	14	284041	72061.2	70931.5	519613	891.787
F12	14	303925	78249.6	69701.5	557094	2176.19
G1	14	350895	94907.8	66010.1	517667	2816
G2	14	366240	99495.5	71320.1	523740	2170.37
G3	14	359964	94906.8	78728.5	547815	2426.97
G4	14	353008	89161.5	79619.5	521806	2608.96
G5	14	307957	75871	76925.5	497963	2176.06
G6	14	298556	79145.8	80815.4	520176	2522.06
G7	14	251762	61128.6	71963.2	453418	2218.44
G8	14	267350	64474.3	76690	492174	2580.91
G9	14	277428	67705.7	78003.5	518697	2496.66
G10	14	269155	63433.1	66765.2	465111	1634.62
G11	14	265561	67039.8	62409.1	458189	2244.67
G12	14	291415	73242.3	66441.8	541587	1956.89
H1	14	406969	105116	73430.5	598014	3628.87
H2	14	313563	79752.6	64361.7	497259	1926.7
H3	14	337335	87383.6	76950.6	558121	2896.71
H4	14	308629	25698.3	13761.7	11478.8	3543.33
H5	14	282343	23928	13026.2	10910.9	3256.44
H6	14	238956	19878.9	10761.3	8685.06	2635.76
H7	14	244200	55836.5	71009.4	481026	2128.17
H8	14	268884	60285.4	71479.5	483990	2706
H9	14	289434	65698	77182.8	540678	3659.48
H10	14	298386	24319.8	12487.4	10083.8	3021.65
H11	14	298512	23617	11821.9	9578.75	2591.08
H12	14	309583	23474.3	10470.6	8125.34	2262.1
A1	15	257433	71659.9	44650.5	419828	960.196
A2	15	244883	62246.1	43448.5	369681	1701.94
A3	15	199596	51323.6	40674.6	344266	1472.28
A4	15	190118	43816.5	43274.1	345062	1712.54
A5	15	212626	49699.1	46751.6	351004	1357.69
A6	15	176415	41510.8	44404.1	339435	1572.56
A7	15	185357	44956.7	44059.1	324870	1826.7
A8	15	210605	47265	49000	361933	2075.58
A9	15	206964	47514.8	49930.8	381531	2128.41
A10	15	237375	55188.4	51676.5	405230	2359.1
A11	15	239307	57479.4	49999.4	427723	0
A12	15	258641	66793.1	50863.2	446372	1544.91
B1	15	247384	65127.8	44240.6	378742	1637.21
B2	15	238179	61478.1	45168.8	362253	1854.94
B3	15	218500	54188.1	43161.6	324338	1641.84
B4	15	216447	53192.1	47879.1	356024	10523.4
B5	15	209684	54007.9	48486.2	342338	1970.89
B6	15	206809	51652.4	50095.1	348747	2061.43
B7	15	197591	48781.7	48629.1	336138	1617.18
B8	15	224192	52820.3	54727.7	376754	2175.76
B9	15	228802	55693.1	54365.4	387928	1564.7
B10	15	225007	50620	57296	432257	2371.46
B11	15	239730	55204.8	56044.6	439963	1770.47
B12	15	237134	56751.8	49582.4	418272	2168.59
C1	15	308373	84260.1	55426.5	444654	2397.06
C2	15	272438	71763.6	53120	403377	1958.98
C3	15	242850	63318.2	53225.9	384243	1865.4
C4	15	189823	44575.4	44341	313421	1616.53
C5	15	226462	56516.6	53395.3	359734	1924.39
C6	15	220145	54046.1	55418.1	371170	1972.85
C7	15	182794	42575.8	51495.7	344306	1998.97
C8	15	210745	50162.4	60214.7	405030	1761.64
C9	15	219676	52216.3	57414.9	394645	1303.45
C10	15	227109	53329.9	58457.7	418485	1940.45
C11	15	240705	58884.1	58570.3	447348	2014.91
C12	15	241559	62127.3	55373.2	454489	1703.6
D1	15	367084	98171.8	68168.6	528532	3173.48
D2	15	288706	74840.9	57939.4	422129	1514.66
D3	15	274328	70977.4	60762.8	415747	2114.12
D4	15	262703	66671.8	61254.6	405397	1915.73
D5	15	270147	68379.5	66067.7	422227	2387.03
D6	15	274479	68676.5	69304.1	431717	2041.98
D7	15	222135	51903.1	66315.6	410250	2747.74
D8	15	202218	46079.4	58485.6	371505	1238.5
D9	15	210101	48481.5	60072.9	391947	2178.74
D10	15	249896	58717.6	64830.8	443906	1834.11
D11	15	245052	63222.9	59133.3	436153	465.147
D12	15	287165	75388.3	64384	506561	2303.11
E1	15	367649	104068	69602.6	534361	2722.73
E2	15	314019	83885.2	65153.4	466280	2368.35
E3	15	297223	79682.5	67332.7	447327	1764.98
E4	15	296107	76071.4	74146.8	469312	2292.31
E5	15	277466	71726.7	71985.6	446000	2153.18
E6	15	284864	72431.8	77213.4	468445	2290.36
E7	15	243616	63059.8	71347	430363	2451.5
E8	15	269974	69585.2	76874.2	472020	2769.23
E9	15	266242	68735.3	72984.8	464138	2300.72
E10	15	168753	20120	61199.4	430877	1697.07
E11	15	254444	63797.3	63143.1	454302	1703.67
E12	15	283314	70790	66303	514355	2150.78
F1	15	349474	95719.1	70050.1	521764	2759.9
F2	15	309893	84965.5	65169.6	468164	1563.53
F3	15	309991	84392	71270.5	465176	1853.36
F4	15	305559	79297.5	75462.8	477933	2687.71
F5	15	311223	77776.6	81393.9	515259	2091.06
F6	15	297985	75053.6	79017.1	483914	2536.9
F7	15	251333	64582.7	67893.9	406107	2240.62
F8	15	280313	70023.9	74358.4	451300	3462.15
F9	15	300628	74879	78324.9	495895	2153.74
F10	15	284083	70938.6	75640.7	517845	1742.7
F11	15	284405	72080.5	70844.2	520295	1026.63
F12	15	303574	78177	69947.6	557168	2286.2
G1	15	351655	94837	65901.6	518622	2518
G2	15	367466	99595.1	71852.8	522885	2113.93
G3	15	360530	95011.7	78752.4	547943	1983.75
G4	15	353745	89253.3	79773.2	521805	2715.57
G5	15	308728	75919.9	77059	497753	2279.68
G6	15	300177	79390.4	81225.2	522180	2291.52
G7	15	252163	61296.8	71993.6	453812	2508.94
G8	15	267576	64458.2	76760.5	492626	2617.84
G9	15	278138	68081	78060	518701	2377.96
G10	15	269844	63583.7	66684.9	464617	1563.69
G11	15	266065	66879.1	62560.9	457520	1532.71
G12	15	292150	73372.4	66470.4	541803	1805.12
H1	15	407502	104715	73140.3	598124	2917.03
H2	15	313926	79896	64261.6	497596	2291.89
H3	15	337849	87901.8	77162.1	558074	3000.08
H4	15	309335	25735.2	13971.5	11309	3591.3
H5	15	282319	24039.2	13138.1	10938.7	3181.85
H6	15	238915	19795	10828.8	8457.95	2399.8
H7	15	244294	56167	71038.3	481240	2383.31
H8	15	269355	60467.5	71508.2	484184	2586.33
H9	15	289891	65979.1	77058.5	540328	2944.29
H10	15	299119	24172.7	12409.2	10420.3	2593.16
H11	15	298121	23665.5	11821.9	9933.02	2491.43
H12	15	310387	23786.3	10519	8314.34	2283.36
A1	16	257686	71599.2	44628.1	418749	1809.66
A2	16	244984	62163.5	43444.2	369515	1866.5
A3	16	200459	51421	40945.5	344038	1252.56
A4	16	190119	43949.8	43277.6	344991	1679.59
A5	16	212802	49813.5	46660.1	351209	1450.03
A6	16	176837	41700.3	44414.4	339349	1551.68
A7	16	186205	44971.7	44022.9	325016	1393.95
A8	16	210541	47495	48884.9	361585	2226.68
A9	16	206694	47577.7	49957.6	381867	1994.42
A10	16	238026	55348.3	51760.2	405040	2339.97
A11	16	239688	57794.4	49781	428161	0
A12	16	256011	66226	50220.1	443534	2114.23
B1	16	247658	65154.2	44206.7	378917	1601.24
B2	16	239339	61770.3	45213.5	362313	1557.97
B3	16	218855	54264.8	43175.9	324182	1288.76
B4	16	215803	53199.7	47961.9	355894	10526
B5	16	209705	54143.3	48495.5	342311	2180.7
B6	16	206744	51867.9	50238.4	348747	2096.94
B7	16	197950	48861.6	48587.3	336719	1559.83
B8	16	224053	52977.4	54945.8	376971	2043.7
B9	16	229101	55702.1	54317.7	387861	1540.88
B10	16	225145	51040.7	57192.4	433444	2277.18
B11	16	239876	55107.9	56011.8	440273	1804.34
B12	16	236653	56977.2	49699	417831	2317.49
C1	16	307768	84138.3	55581.1	443962	2550.71
C2	16	272745	71878	53164.1	402731	1931.01
C3	16	243259	63092.1	53012.9	384647	1843.87
C4	16	190206	44376.3	44459.5	313411	1976.95
C5	16	226414	56417.1	53277.3	359664	2026.43
C6	16	219842	54255	55577.9	371214	1910.22
C7	16	182840	42519.6	51533.9	344444	2058.06
C8	16	211470	50439	60429.1	404920	1722.05
C9	16	220164	52298.9	57341.6	394080	1308.41
C10	16	227518	53348.5	58657.3	418029	1854.38
C11	16	241195	58841.9	58669.9	447477	1970.99
C12	16	242010	62400.5	55492.7	455023	1892.53
D1	16	366546	98315	68169.8	528802	2877.7
D2	16	288948	75116.8	58009.5	422133	1461.32
D3	16	274296	71298.7	60692.6	415701	1879.1
D4	16	262673	66697.2	61093	405306	1929.55
D5	16	270587	68613.2	66335.9	421833	2346.68
D6	16	274936	68854.2	69086.4	431625	1796.33
D7	16	222543	52388.2	66335.1	410271	2842.05
D8	16	202418	46315.9	58401.3	371584	1246.03
D9	16	210237	48730.4	60170.2	392245	2249.57
D10	16	250352	58827	64886.6	443886	1990.99
D11	16	246248	63150.3	59043.4	436064	384.252
D12	16	288185	75607.3	64421.5	506184	1903.77
E1	16	368513	104250	69653.1	533721	2677.62
E2	16	314253	83967.8	65128.9	465486	2098.5
E3	16	297735	79863.9	67288.8	447883	1815.06
E4	16	296601	76311.6	74118.1	469484	2016.29
E5	16	277610	71538.9	71944.6	446347	1797.2
E6	16	284924	72684.2	77336.1	467870	2498.4
E7	16	244314	63552.9	71260.5	430134	2502.25
E8	16	270542	69828.5	76892.4	471918	2685.8
E9	16	267028	69044.6	72916.4	464408	2323.67
E10	16	168065	19628.9	61033.5	429877	2120.67
E11	16	254750	64416.6	63074.7	454637	1531.42
E12	16	283799	70880.1	66188.7	514391	1954.23
F1	16	349454	95644.3	70166.6	522593	3194.43
F2	16	310561	84957	65229.7	467779	1837.39
F3	16	310538	84317.3	71400.3	464945	1961.83
F4	16	305846	79215.7	75415.1	478014	2715.48
F5	16	311348	77939.8	81353	515026	1783.46
F6	16	298276	75037.5	79143	483550	2195.72
F7	16	251866	64213.3	67854.3	405303	2225.31
F8	16	280333	69979.9	74278.4	450828	2835.71
F9	16	300532	75022.2	78304.6	496411	2443.86
F10	16	284307	71274.8	75725.8	518044	2165.85
F11	16	284867	72350.5	70909.7	519886	1050.12
F12	16	304564	78079.5	70031.1	557470	2459.82
G1	16	351308	95014.8	65957.4	518535	2481.88
G2	16	368005	99890.1	71820.4	523614	2176.5
G3	16	360851	94881.5	78975.5	547493	1902.93
G4	16	353949	89586.5	79589	521800	2767.88
G5	16	308293	76009.2	77055.2	497087	2442.79
G6	16	301277	79867	81609.4	524838	1998.02
G7	16	252674	61397.6	72072.1	453581	2357.62
G8	16	267873	64824.3	76681.4	492388	2511.92
G9	16	278522	68628.3	78249.9	518424	2434.78
G10	16	269918	63880.5	66782.6	464538	1325.81
G11	16	267051	67386.6	62777.5	457823	1978.74
G12	16	292136	73306.7	66466.5	541524	1900.13
H1	16	406939	105364	73288.8	597314	3375.73
H2	16	314356	80072.8	64361.7	497658	2059.5
H3	16	339039	88300	77139.3	557877	2921.66
H4	16	308662	25704	13877.8	11712.3	3953.44
H5	16	282403	23718.7	12967.2	10875.1	3247.61
H6	16	238988	19552.9	10749.8	8504.63	2396.23
H7	16	244167	56112.1	70846	480823	2424.87
H8	16	269071	60485.1	71748.1	483412	2976.88
H9	16	290446	66111.5	77198.8	540387	3105.96
H10	16	299289	24073.4	12299.9	10387	2796.91
H11	16	298301	23747	11682.5	9522.6	2450.23
H12	16	310917	22919.6	10275.4	8176.72	1895.42
A1	17	257916	71376	44514.4	418240	1260.35
A2	17	244752	62719.5	43506.5	369600	1985.42
A3	17	200224	51613.8	40913.1	343856	1199.6
A4	17	190498	44214.5	43447.4	344464	1730.75
A5	17	213266	49984.6	46844.6	351126	1538.33
A6	17	176842	41635.1	44386.5	339286	1359.83
A7	17	186076	44997.1	44080	324635	1647.33
A8	17	210794	47670.6	49097.8	361554	2225.02
A9	17	206489	47545.3	50114.5	382302	2054.18
A10	17	237760	55160.1	51814	404861	1983.69
A11	17	240074	57739.5	49797	427825	0
A12	17	257755	66488.7	50800.7	444684	2075.54
B1	17	247458	65014.6	44228.4	378438	2092.81
B2	17	239379	61663.9	45255.9	362170	2189.59
B3	17	219159	54530.1	43218.6	324762	1517.28
B4	17	216303	53459.7	47966.2	356043	10348.4
B5	17	210058	54229.9	48491.3	342368	2244.74
B6	17	206902	51706.4	50243.2	348514	2230.93
B7	17	198244	48977.2	48669.5	336074	1614.12
B8	17	224740	52912.1	54805.4	376718	2107.35
B9	17	229605	55741.2	54346.5	387936	1457.92
B10	17	225638	51192.3	57564.9	434121	2175.71
B11	17	240210	55282	55914.7	440038	1916.21
B12	17	237502	56802.6	49602.6	418136	1664.79
C1	17	308613	84426	55506.8	444159	2342.97
C2	17	272575	71906.3	53162	402032	2198.29
C3	17	243196	63552.8	53377	384303	1770.82
C4	17	190088	44402.7	44553.8	313582	1540.34
C5	17	227114	56668	53355.9	360123	1894.86
C6	17	220030	54296.1	55741.6	371260	1960.81
C7	17	182845	42653.9	51592.8	344168	2042.47
C8	17	211329	50486.3	60306.1	405027	1722.05
C9	17	220690	52493.3	57462.1	394131	1405.11
C10	17	227544	53426.5	58678.8	419313	2165.62
C11	17	240929	59025.6	58970.9	447436	2227.32
C12	17	242123	62343.8	55524.8	454973	1885.94
D1	17	367568	98276.7	68190.1	528550	3293.03
D2	17	289653	75186.8	57953.6	421865	1354.64
D3	17	274756	71182.1	60724.7	416181	1763.12
D4	17	262778	66807.2	61215.9	405403	1881.19
D5	17	270736	68774.1	66444	422318	2125.73
D6	17	275438	69136.9	68957	432128	1908.6
D7	17	222592	52269.7	66274.8	410198	2561.09
D8	17	202904	46437.4	58478.1	371462	1364.78
D9	17	210533	48924	60163.5	392243	2045.52
D10	17	250577	58703.4	64998.1	444086	1909.9
D11	17	246019	63441.8	59212.5	435601	663.533
D12	17	288278	75517.1	64491.4	506441	2339.68
E1	17	369569	104750	69619.9	534213	2331.81
E2	17	314950	84141	65289.6	466079	2224.88
E3	17	298047	79627.6	67423.7	447836	1647.38
E4	17	297066	76241.8	74046.3	469839	2517.84
E5	17	278414	71847.8	71969.6	446046	1756.51
E6	17	285259	73037.1	77328.3	468217	2305.01
E7	17	244667	63603	71527.9	429842	2078.7
E8	17	271002	70012.9	77094.1	471464	2420.28
E9	17	267208	69224.8	73044	463686	2216.26
E10	17	166982	19436	61011.3	428274	2111.7
E11	17	255380	64289.7	63359.9	454099	1529.63
E12	17	284039	71044.3	66096.7	513568	2006.21
F1	17	350237	95540.8	70022.9	521122	3409.46
F2	17	310885	85268	65084.7	467854	1811.64
F3	17	311763	84500.4	71502.5	465549	2187.11
F4	17	306506	79305.4	75376.6	478343	2293.91
F5	17	312017	78199.2	81503.1	514942	2222.89
F6	17	298419	75198.8	79190.2	483758	2431.38
F7	17	252092	64065.2	67687.2	405576	1990.06
F8	17	280572	70149.1	74393.4	451135	2988.52
F9	17	300620	75353.2	78520.9	495749	2702.7
F10	17	284636	71120.5	75694.9	518400	2094.43
F11	17	285151	72531.2	71046.7	520088	608.826
F12	17	304132	78520.9	69995.5	556977	2523.42
G1	17	351026	94846.9	65867.5	518284	2749.78
G2	17	367893	99711.4	71734.3	524100	1918.86
G3	17	361305	95618.3	79009.5	547906	1876.42
G4	17	353986	89680.3	79670.8	522170	2700.76
G5	17	308975	76252.7	76920.8	497443	2525.31
G6	17	302439	80233.4	81977.3	526767	2273.93
G7	17	252576	61329.2	72149.6	453407	2500.54
G8	17	268098	64577.4	76727.7	492359	2367.13
G9	17	278899	68306.6	78216.6	518832	2545.36
G10	17	270048	63740.9	66933.6	464403	1308.35
G11	17	267816	67220.9	62935.4	457974	1797.43
G12	17	293021	73658.5	66379.1	541485	1499.13
H1	17	407149	104896	73027.6	596558	3025.76
H2	17	314451	80464.7	64220.8	498100	1922.12
H3	17	339402	88281.1	77114.1	558184	2965.62
H4	17	308623	25659.5	13897.5	11878.3	3502.88
H5	17	282088	23838.8	13000.2	10981.5	3695.15
H6	17	238998	19741.1	10885.5	8553.1	2577.66
H7	17	244435	56016.7	70890.2	481080	2582.41
H8	17	268874	60421	71730.5	484365	2760.73
H9	17	290585	66129.8	77292.3	540807	3124.16
H10	17	298911	24252.7	12334.7	10204.6	2767.28
H11	17	298837	23395.5	11686.5	9641.58	2427.64
H12	17	310144	23545.7	10314.5	8426.27	1755.48
A1	18	258111	71961.9	44581.7	417636	1870.85
A2	18	245194	62525.8	43464.9	369131	1679.64
A3	18	200003	51572.4	40992.2	343822	953.399
A4	18	190573	44202.1	43345.7	345123	1733.35
A5	18	213534	49876.8	46731.1	350995	1433.83
A6	18	177004	41669.3	44451.9	339299	1383.11
A7	18	186254	45232	44048.7	325243	1636.87
A8	18	211312	47586.5	49130.9	361565	2026.6
A9	18	207008	47396.8	50138.4	381807	2040.69
A10	18	237237	55265.3	51709.4	404861	2342.99
A11	18	240226	57930.4	49976.5	428158	0
A12	18	258297	66709.7	50647.4	444445	1999.54
B1	18	246829	65277.6	43846.6	378177	1903.64
B2	18	239415	62054.3	45149.3	362220	1785.13
B3	18	218969	54772.2	43197.2	324442	1462.35
B4	18	216647	53241.3	47910.1	355980	10531.2
B5	18	210456	54388.4	48557.2	342662	1975.94
B6	18	207387	51820.8	50221.6	348873	2290.66
B7	18	198636	48935.1	48862.5	336268	1970.43
B8	18	225356	53117	54831.3	376743	2124.05
B9	18	230243	55880.4	54448.4	388045	1614.8
B10	18	226034	51125	57576.5	435935	2142.48
B11	18	240355	55193.4	56038.4	439885	1804.34
B12	18	237540	56901.7	49674.4	417774	1754.35
C1	18	308281	84795.5	55453.2	443394	2709.29
C2	18	272714	72470.9	53164.1	402646	2036.68
C3	18	243684	63712.9	53382.6	384544	1477.71
C4	18	189763	44464	44581	313383	1679.04
C5	18	227426	56823.7	53516.9	359618	1858.16
C6	18	220438	54522	55638.1	371784	1780.14
C7	18	183197	42631.9	51584.9	344319	2183.61
C8	18	211716	50601.3	60488.7	404930	1943.09
C9	18	220804	52714.8	57710.5	394300	1386.1
C10	18	227707	53381.6	58703.8	418990	2187.35
C11	18	241189	59065.7	58758.5	447208	1929.12
C12	18	242306	62380.8	55277	455080	1570.7
D1	18	366475	98239.7	68303.5	528726	3119.25
D2	18	289787	75202.2	58024.7	422199	1618.32
D3	18	275016	71248.3	60727.7	415722	1881.14
D4	18	263130	67333.2	61401.7	405415	2016.4
D5	18	271459	68970.1	66458.7	421884	2272.02
D6	18	275973	69162	69207.1	431846	1932.59
D7	18	222845	52384.5	66557.5	409898	2846.97
D8	18	203351	46571	58418	371060	1625.69
D9	18	211098	49152.3	60181.9	391806	2468.79
D10	18	250621	58876.4	65042.4	443979	1712.48
D11	18	246367	63545.9	59058.9	436420	722.278
D12	18	288137	76026.1	64550.2	506176	2362.42
E1	18	370336	104760	69658.5	533308	2657.12
E2	18	315283	84081.8	65219.3	465928	1916.31
E3	18	298878	80105.4	67478.2	447728	1710.54
E4	18	297185	76550.6	74284.8	469197	2272.11
E5	18	278512	71923.1	71967.6	446147	1944.68
E6	18	286071	72830.7	77620.3	468299	2286.46
E7	18	244436	63209.1	71397.1	430100	2253.39
E8	18	271992	70292.5	77021.5	471477	2364.32
E9	18	267809	68979.1	73125.2	464235	2165.76
E10	18	166884	19473.2	60760.2	427326	2222.98
E11	18	255438	64536.8	63326.2	454226	1662.4
E12	18	284362	71346.3	66350.3	514094	1851.07
F1	18	348959	95558.3	70133.3	522350	2976.42
F2	18	310493	85483	65083.5	467312	1763.66
F3	18	311225	85020.4	71562.1	465397	1853.36
F4	18	306805	79582.4	75520.5	478039	2646.59
F5	18	312381	78393.7	81503.1	514933	2095.35
F6	18	299175	75611.5	79168.4	483415	2428.74
F7	18	252203	64532.4	67894.9	404993	2434.74
F8	18	280598	70170.6	74371.4	450596	2673.78
F9	18	301132	75280	78379.6	495325	2247.57
F10	18	284628	71157.7	75632.2	518155	2084.84
F11	18	285512	72379.5	71009.3	520171	989.853
F12	18	304685	78572.5	69846.3	557517	2384.18
G1	18	350100	94609.7	65893.9	518654	2624.86
G2	18	368402	99952.7	71890.3	523898	2272.2
G3	18	361442	95135.6	79148.1	547974	2271.65
G4	18	354687	89974.3	79823.5	522542	2509.26
G5	18	309132	76545.1	76989.4	497300	2241.31
G6	18	303883	80845.1	82394.4	529192	2396.14
G7	18	253247	61448	72125.6	453541	2316.52
G8	18	268497	64818.6	76881.2	492850	2755.82
G9	18	278866	68739.5	78113.6	519039	2528.11
G10	18	270329	63982	67015	464509	1365.09
G11	18	268040	67199.2	62876.6	457937	1820.39
G12	18	293025	74046.1	66512.2	541384	1886.56
H1	18	406521	105154	73261.5	595996	3251.71
H2	18	314240	80467.2	64559.6	497657	2162.53
H3	18	338842	88805.7	77195.8	558074	2944.24
H4	18	308170	25851.5	13906.9	11616.4	3421.99
H5	18	282006	23735.7	13156.1	10999.3	3218.16
H6	18	238765	19875.4	10779.1	8591.71	2257.69
H7	18	244109	55922.3	71036.4	480369	2446.14
H8	18	269631	60968.4	71547.1	484113	2594.68
H9	18	290857	66259	77500.6	540679	3184.11
H10	18	298662	23884.9	12396.7	10514	3090.8
H11	18	297787	23288.4	11603.5	9850.13	2585.77
H12	18	308756	23351.9	10528.3	8341.86	2141.65
A1	19	257104	71940.6	44512.9	417485	1282.2
A2	19	245789	62845.6	43673.8	369634	1336.71
A3	19	200412	51946.6	41050.1	343741	1273.16
A4	19	190437	44220.7	43381.1	344586	1425.53
A5	19	214081	50090.1	46917.3	351070	1207.82
A6	19	177520	41674.7	44526.7	339223	1360.63
A7	19	186817	45348.3	44090.5	325053	1487.26
A8	19	211287	47645	48994.2	361425	2191.81
A9	19	206506	47808	50002.5	381649	2271.07
A10	19	237878	55242	51854.9	405113	2188
A11	19	240266	57738.3	50209.7	427634	0
A12	19	259985	67045	50901.5	447397	1866.88
B1	19	247023	65202.7	44170	377809	1890.32
B2	19	240095	62026.2	45216.9	361265	1847.19
B3	19	220081	54661.2	43104.7	324623	1587.9
B4	19	216081	53509.8	48027.5	355659	10602.8
B5	19	210645	54259.6	48515.8	342450	2087.17
B6	19	207499	52290.5	50210.4	348743	2109.05
B7	19	198546	49118.3	48583.5	336335	2016.31
B8	19	225397	53365.1	54833.6	376343	2063.59
B9	19	230340	56052.2	54588.2	387947	1362.64
B10	19	226192	51290.1	57866.8	437145	2247.54
B11	19	240378	55356.1	56233.7	440202	2106.09
B12	19	237699	56533.5	49639.6	417846	1998.41
C1	19	307690	84868	55416.7	443163	2535.96
C2	19	273040	72198.4	53115.8	402275	1902
C3	19	244496	63840.4	53277.5	384814	1848.55
C4	19	189680	44412.2	44485.8	313487	1901.74
C5	19	227195	56930.9	53466.8	359384	2235.88
C6	19	220039	54301.5	55821.9	371570	1999.35
C7	19	183976	42704	51673.2	343838	2120.42
C8	19	211780	50700.6	60436.5	404803	1653.6
C9	19	220743	52937.9	57722.7	394450	1286.92
C10	19	227624	53138.4	58608.3	418648	1970.01
C11	19	241493	59265.5	58957.8	447213	1818.83
C12	19	242596	62547.5	55574.6	455260	1681.64
D1	19	367062	98374.2	68215.1	528202	3380.53
D2	19	290364	75598.5	58061.3	421652	1726.01
D3	19	274860	71408.5	60776.8	415991	1970.67
D4	19	263927	67494.9	61460.8	405675	1715.37
D5	19	271710	69060.2	66483.3	421945	2160.03
D6	19	276470	69049	69240.4	432452	1935.47
D7	19	223424	52602	66429.3	410016	3050.32
D8	19	203574	46870.7	58457.2	370826	1601.44
D9	19	210954	49044.3	60153.4	391912	2274.86
D10	19	250992	58990.2	65001.7	444213	1750.38
D11	19	247031	63801.1	59280.1	435951	1103.64
D12	19	289476	75920.9	64648.5	506298	2097.51
E1	19	370053	105017	69562.7	533354	2879.91
E2	19	316454	84499.5	65142.2	465990	2170.23
E3	19	299632	80235.2	67658	447678	2121.02
E4	19	297560	76683.9	74321.3	469468	2480.81
E5	19	278924	72173.9	72148.8	446182	2157.25
E6	19	285977	72867.6	77390.6	468222	2397.8
E7	19	245026	63652.1	71447.3	429443	2232.9
E8	19	272384	70078.6	77050.7	471821	2389.76
E9	19	268086	69486	73165.3	464049	2249.31
E10	19	166274	19232.5	60668	426847	2093.75
E11	19	255869	64671.2	63355.3	454368	1654.33
E12	19	284792	71439.9	66280.7	513076	2023.26
F1	19	349780	95233.5	70059.2	522103	3016.46
F2	19	312118	85494	65076.5	467137	1479.27
F3	19	312247	85027.8	71511	464587	2221.53
F4	19	306816	79674	75471.9	477796	2287.75
F5	19	313047	78471.7	81657.5	515451	2124.29
F6	19	299470	75641.1	79149.1	483614	2569.44
F7	19	252408	64572.6	67725.9	404795	1950.86
F8	19	281475	70516.7	74378.4	450632	3184.86
F9	19	301698	75285.3	78422.4	495176	2254.04
F10	19	284914	71419.4	75662	518319	2133.87
F11	19	285886	72877.5	70968.8	520303	408.608
F12	19	304755	78405.3	70213.2	556838	2132.36
G1	19	350236	94911.1	66037.9	518918	2689.58
G2	19	369395	99970.6	71951.4	524412	2377.71
G3	19	361800	95946.9	79036	548501	1969.86
G4	19	355023	90120.9	79898.3	522123	2525.05
G5	19	309586	76619.3	77088.5	497030	2593.43
G6	19	304484	81467.6	82650	531709	2291.52
G7	19	252880	61526.2	72260.3	453121	2309.05
G8	19	268491	64532.9	76887.9	493039	2504.15
G9	19	279008	68758.8	78139.8	519185	2706.66
G10	19	270142	63937.3	67021.6	464392	1557.14
G11	19	267995	67509	63070	458105	2311.15
G12	19	293337	74244.9	66646.6	541283	1682.97
H1	19	406225	104784	72894.5	596041	2927.22
H2	19	314871	80407.8	64319.8	497958	2081.25
H3	19	340157	89069.9	77491.4	557915	2944.24
H4	19	307986	25527.1	13958.4	11449.4	3463.38
H5	19	281789	23754.7	13014.2	10940.7	2927.66
H6	19	238423	19965.5	10819	8773.04	2286.29
H7	19	244216	56115.9	70885.4	480563	2552.45
H8	19	269975	60636.6	71646.2	484495	2983.37
H9	19	291220	66262.3	77188.1	540840	3131.65
H10	19	298473	24125	12564.4	10447.4	2829.02
H11	19	297605	23507	11639.6	9772.59	2529.96
H12	19	310023	23464.1	10435.3	8538.21	1895.42
A1	20	257474	71843.8	44690.9	416923	1529.9
A2	20	246134	63123.1	43744.8	369334	1821.91
A3	20	201343	51840.9	41006.4	343521	1324.17
A4	20	190068	44363.7	43372.3	344432	1417.72
A5	20	213938	49996.8	46907.5	350574	1243.47
A6	20	177469	41924.9	44516.4	339150	1547.67
A7	20	186506	45196.4	44196.6	324550	1624
A8	20	211182	47997.8	49163.2	361317	1858.06
A9	20	207248	47459.6	50123.1	381781	2222.87
A10	20	237700	55499	51871.9	404475	1864.93
A11	20	240646	57820.6	49920.5	427715	0
A12	20	258708	66595.3	50326.6	443238	1808.84
B1	20	247946	65158.6	44326.2	378409	1851.69
B2	20	240796	62340.6	45071.3	361520	2004.53
B3	20	220462	55074.8	43314.1	324215	1157.33
B4	20	216817	53648.2	48130.2	355729	10664.9
B5	20	210766	54239	48504.8	342172	2144.47
B6	20	207501	51962.9	50350.5	348203	2439.98
B7	20	199596	49132.1	48689	336234	2025.49
B8	20	225434	53334.7	54883.8	376911	2080.3
B9	20	230959	56343.6	54520.8	387800	1657.51
B10	20	226886	51176.2	57999	438116	2289.75
B11	20	240514	55372.7	56121.2	440432	1909.03
B12	20	237333	57011.4	49712.5	417706	2130.52
C1	20	308228	84702.1	55515.4	443071	2540.88
C2	20	273701	72553.7	53295.3	402058	2262.51
C3	20	244401	63900.9	53214.7	384289	1664.07
C4	20	190113	44343.3	44280.7	313355	1634.11
C5	20	227333	56879.9	53389	359640	2197.39
C6	20	220508	54343.5	55643.7	371452	1890.95
C7	20	183613	42676.7	51674.8	343877	2021.13
C8	20	212579	50658.1	60487	404865	1750.92
C9	20	221594	52791	57539.5	394547	1384.45
C10	20	227897	53324.8	58633.2	418730	2066.51
C11	20	241718	59055.7	58622.6	447405	1881.12
C12	20	242733	62643.6	55408.6	455162	1858.48
D1	20	366825	98011.4	68145.9	527677	3381.76
D2	20	290609	75690.2	58133.3	422043	1337.53
D3	20	275826	71523.2	60791.8	416363	1791.61
D4	20	263734	67384.1	61417.2	405876	1750.91
D5	20	272403	69208.3	66590.4	422694	2535.34
D6	20	276897	69520.1	69358.3	432197	1757.95
D7	20	222948	52800.1	66449.7	409886	2636.73
D8	20	204005	47001.1	58480.6	371354	1419.97
D9	20	211470	49244.6	60409.9	391999	2346.53
D10	20	250892	58916.1	65207.9	444569	1797.09
D11	20	247419	63943.4	59207.7	436205	1038.15
D12	20	289125	76130.3	64483.3	505535	1738.7
E1	20	370658	105336	69522.8	533368	2416.56
E2	20	316395	84462.6	65278.4	466174	2205.53
E3	20	300413	80347	67568.1	447614	1925.03
E4	20	298302	76831	74419.6	469422	2506.61
E5	20	279331	72209.1	71922.5	446318	1675.15
E6	20	286789	73264.7	77485	468175	2606.81
E7	20	244921	63676.7	71539.7	429776	2151.89
E8	20	272617	70630.9	77171.7	471847	2480.3
E9	20	268784	69728	73148.9	463988	2235.54
E10	20	165829	19110.4	60639.6	425326	1837.97
E11	20	256333	64877	63432.7	453476	1726.1
E12	20	284874	71313.6	66181.2	512840	2054.13
F1	20	350757	95797.1	70050.1	520837	3175.15
F2	20	312254	85536.5	65406.6	466917	1644.29
F3	20	312935	84944.6	71634.4	464209	2077.6
F4	20	307380	79759.8	75622.9	478445	2583.87
F5	20	312981	78888.2	81786.7	515175	1956.02
F6	20	300502	75457.1	79343.2	483521	2382.14
F7	20	252927	64734.4	67870.4	404703	1990.06
F8	20	281909	70314.3	74489.4	450530	3119.08
F9	20	302108	75523	78600.2	495160	2347.87
F10	20	285317	71187.5	75883.1	518875	2215.94
F11	20	286272	72624.8	71032.2	520486	858.077
F12	20	304686	78639.4	70000	557334	2356.68
G1	20	349587	94753	65991.5	518622	2508.97
G2	20	370029	100287	71932.7	524236	2250.12
G3	20	362289	95880	79266.6	548748	2294.38
G4	20	355163	90078.9	79991.9	521746	2889.3
G5	20	310280	76710.5	77284	497207	2282.56
G6	20	305501	81565.4	83156.5	534761	2692.42
G7	20	253363	61556.8	72312.9	453497	2216.58
G8	20	268879	64756.1	76748.9	492868	2760.68
G9	20	278683	68656.6	78501.4	519403	2487.53
G10	20	270424	63887.1	66995.5	464016	1574.6
G11	20	268991	67723.2	62819.1	458257	2162.47
G12	20	293621	74347.9	66543.5	541223	2030.92
H1	20	405850	105188	72961	594886	3136.19
H2	20	315304	80423.9	64362.9	497609	2273.57
H3	20	340524	88681.8	77371.2	558287	3324.44
H4	20	308976	25704	13995.8	11626.9	3599.77
H5	20	281825	23677.6	13172.1	10849.3	3074.87
H6	20	238453	19917.8	10732.9	8689.55	2311.32
H7	20	244949	56214.2	70865.2	480859	2354.32
H8	20	269959	60908	71851	483995	2458.31
H9	20	291199	66368.9	77603.7	541346	3095.25
H10	20	299179	24042.4	12340.9	10573.2	2549.94
H11	20	297483	23542.7	11756.2	9569.39	2479.47
H12	20	310358	23525.3	10214.1	8284.98	1844.05
A1	21	258176	71884.8	44613.1	416011	1108.82
A2	21	246339	63166.6	43811.5	368711	1645.67
A3	21	201705	52358.1	41176.9	343504	1331.03
A4	21	190405	44311.3	43334.2	344382	1636.23
A5	21	213971	50122.5	46977.7	351038	1333.38
A6	21	177561	42028.2	44553	338867	1530.81
A7	21	186854	45258.1	44120.2	324878	1752.7
A8	21	211243	47888.2	49042.3	361442	2289.78
A9	21	206995	47608.1	50181.4	381568	2248.9
A10	21	238292	55376.6	51846	404593	2125.6
A11	21	240843	57887.4	50250.8	427590	0
A12	21	255479	65508.9	49808.5	437290	2195.76
B1	21	248333	65437.8	44375.1	377454	1968.92
B2	21	241609	62429.4	45346.5	361494	1690.95
B3	21	220707	54999.1	43423.9	324146	1106.33
B4	21	216835	53627.9	47953.3	355973	10630.4
B5	21	210803	54669.9	48529.3	342481	2146.15
B6	21	207811	52198.5	50430.6	348401	2171.2
B7	21	199443	49297.8	48680	336192	1854.98
B8	21	225523	53394.7	54909	377023	2195.65
B9	21	231453	56338.7	54614.5	388328	1687.9
B10	21	227212	51443.5	58232.2	438905	2330.15
B11	21	240415	55580.3	56024.1	440416	1976.77
B12	21	238025	57317	49821.2	418027	1746.51
C1	21	308844	84568.6	55397.2	442038	2601.11
C2	21	273981	72545	53300.5	401981	2009.74
C3	21	245279	64056.3	53480.2	383754	2006.81
C4	21	190158	44471.6	44757.9	313624	1502.25
C5	21	227923	56865.2	53306.8	359136	2321.8
C6	21	220583	54131.5	55764.9	371277	2227.39
C7	21	184094	42619	51683.5	344260	2244.33
C8	21	212321	50833	60586.5	404524	1686.59
C9	21	221480	53014.1	57663.2	394441	1287.74
C10	21	228246	53327.4	58640.1	418576	1962.18
C11	21	241758	58875	58834	447296	2322.3
C12	21	242740	62999	55524.8	455102	1803.56
D1	21	366812	98170.6	68192.4	528037	3309.05
D2	21	291123	75680.9	58358.7	421593	1112.09
D3	21	276256	71584.5	60892.1	415296	1976.77
D4	21	264353	67710.2	61477.2	405882	1896.98
D5	21	272800	69257	66566.8	421874	2047.04
D6	21	277977	69676.3	69453.4	432234	1900.92
D7	21	223647	52730.7	66588.6	409072	2654.42
D8	21	204330	46836.7	58659.1	371223	1607.3
D9	21	211580	49292.4	60165.1	391947	2122.25
D10	21	250858	59018.5	65218.5	444244	2136.41
D11	21	247860	64090.7	59397.1	436006	488.26
D12	21	289015	76455.6	64454.9	505752	2241.83
E1	21	372368	105656	69740.9	533392	2714.52
E2	21	318250	84749.7	65373.3	466079	2007.4
E3	21	301664	80660.3	67651.6	447373	1762.8
E4	21	298646	76966.4	74186.5	468632	2037.61
E5	21	280099	72398.9	72102.7	445494	1733.12
E6	21	287024	73226.9	77554.1	467852	2492.54
E7	21	245400	63711.6	71630.1	429037	2318.78
E8	21	272881	70590.7	77194.9	471537	2507.77
E9	21	268888	69698.9	73037.7	463686	2306.23
E10	21	165420	18811.3	60526.9	424432	1758.1
E11	21	256833	64911.8	63232.3	453453	1568.2
E12	21	285104	71499.1	66235.9	512300	2050.88
F1	21	350753	95692	70162	521759	3473.23
F2	21	313519	85642.2	65189.6	466779	1749.61
F3	21	313554	85098.3	71573.8	464689	2312.26
F4	21	307943	79703.6	75549.9	477834	2293.91
F5	21	313620	78891.2	81466.4	514545	1959.23
F6	21	301052	75653.7	79218.2	483278	2539.54
F7	21	253378	64868.8	67957.2	404412	2183.24
F8	21	281774	70416	74493.4	449932	2730.46
F9	21	302791	75573.9	78555.2	494717	2353.27
F10	21	285238	71243.9	75665.2	518346	2170.11
F11	21	286598	72815.1	71217	520278	561.836
F12	21	305487	78560.1	70042.6	556349	2362.7
G1	21	349786	94367.7	65958.9	519080	2490.91
[truncated: 11,063 more rows]

## Sheet: Multicomponent Data
Block Type	96alum
Chemistry	SYBR_GREEN
Experiment File Name	D:\HAIFENG\CBF117.eds
Experiment Run End Time	2021-08-27 15:22:27 PM CST
Instrument Type	sds7500
Passive Reference	ROX
Well	Cycle	SYBR	ROX
A1	1	268043	438728
A2	1	243102	374049
A3	1	198071	347566
A4	1	189661	349390
A5	1	205873	351419
A6	1	173390	339663
A7	1	178287	325584
A8	1	206626	365387
A9	1	205038	385469
A10	1	237021	409798
A11	1	242859	437143
A12	1	264660	466834
B1	1	255000	388214
B2	1	235949	364326
B3	1	211500	321874
B4	1	214388	353586
B5	1	204117	340667
B6	1	202002	345073
B7	1	188777	333767
B8	1	217111	375567
B9	1	222650	385254
B10	1	217383	415795
B11	1	241497	446045
B12	1	238608	428384
C1	1	316463	457196
C2	1	267414	402518
C3	1	237666	380437
C4	1	189003	310100
C5	1	220898	358336
C6	1	214674	367373
C7	1	176232	344598
C8	1	205756	407767
C9	1	210931	390120
C10	1	221822	416936
C11	1	236072	444336
C12	1	238086	458432
D1	1	375611	537787
D2	1	281004	417883
D3	1	266496	408144
D4	1	254443	398547
D5	1	261501	417996
D6	1	264196	424937
D7	1	213003	411171
D8	1	193532	370616
D9	1	202998	391848
D10	1	244268	439736
D11	1	237569	431175
D12	1	286177	514790
E1	1	365477	540674
E2	1	303937	459736
E3	1	287938	441960
E4	1	289014	464528
E5	1	270136	446040
E6	1	274818	466350
E7	1	235229	433102
E8	1	260127	472710
E9	1	258750	464871
E10	1	208332	449272
E11	1	245945	453296
E12	1	285286	526033
F1	1	353006	531629
F2	1	300449	463744
F3	1	300256	460996
F4	1	297913	474328
F5	1	301439	512854
F6	1	287042	479897
F7	1	243126	406272
F8	1	270605	451150
F9	1	293138	497384
F10	1	278666	512753
F11	1	275848	518860
F12	1	306287	568019
G1	1	364423	529617
G2	1	357979	516957
G3	1	352422	540168
G4	1	343249	516486
G5	1	300394	496141
G6	1	286068	497342
G7	1	244472	452075
G8	1	258846	490384
G9	1	271510	519300
G10	1	262081	462744
G11	1	258770	456468
G12	1	294545	557478
H1	1	414429	612930
H2	1	310217	505865
H3	1	333340	562420
H4	1
H5	1
H6	1
H7	1	244287	491349
H8	1	264546	489290
H9	1	285843	548191
H10	1
H11	1
H12	1
A1	2	265518	436314
A2	2	242081	373235
A3	2	196578	346110
A4	2	188925	348315
A5	2	206590	351407
A6	2	173255	339513
A7	2	179933	325017
A8	2	206353	364033
A9	2	204578	383769
A10	2	236104	407662
A11	2	240865	433739
A12	2	262744	462175
B1	2	253283	386908
B2	2	235372	363249
B3	2	211920	321266
B4	2	213896	354495
B5	2	205110	341017
B6	2	202727	346074
B7	2	190918	334062
B8	2	218618	375275
B9	2	223701	386033
B10	2	218738	416859
B11	2	239639	443322
B12	2	237639	426568
C1	2	315315	456328
C2	2	267969	403319
C3	2	238187	381257
C4	2	188474	311293
C5	2	221869	358708
C6	2	215689	368132
C7	2	178066	344576
C8	2	206347	406520
C9	2	212547	391593
C10	2	222945	417298
C11	2	236198	444930
C12	2	238690	457686
D1	2	373466	537121
D2	2	281730	419111
D3	2	267379	410130
D4	2	255204	400054
D5	2	263092	418317
D6	2	265312	425783
D7	2	214628	410434
D8	2	194353	371372
D9	2	204088	392034
D10	2	244537	440680
D11	2	237731	432184
D12	2	285512	513167
E1	2	364973	541263
E2	2	305377	460891
E3	2	289320	443208
E4	2	289261	466285
E5	2	270335	446142
E6	2	276184	466653
E7	2	236811	432549
E8	2	261459	471736
E9	2	260038	464611
E10	2	194121	447049
E11	2	246625	453181
E12	2	284668	524558
F1	2	351656	530876
F2	2	302135	465443
F3	2	301178	462562
F4	2	299332	475896
F5	2	302460	513125
F6	2	288859	481664
F7	2	244968	406687
F8	2	272460	451464
F9	2	294433	497462
F10	2	279823	513447
F11	2	275386	517812
F12	2	306057	565954
G1	2	361674	528499
G2	2	357230	517780
G3	2	353054	541684
G4	2	344365	517863
G5	2	300701	496025
G6	2	286218	497530
G7	2	245956	452115
G8	2	261251	490580
G9	2	273648	519753
G10	2	263264	463320
G11	2	258836	455798
G12	2	292969	555013
H1	2	413775	614087
H2	2	310183	505584
H3	2	332751	561736
H4	2
H5	2
H6	2
H7	2	244406	490245
H8	2	265347	487359
H9	2	286775	547683
H10	2
H11	2
H12	2
A1	3	262667	433192
A2	3	241154	371668
A3	3	195947	344635
A4	3	188614	346691
A5	3	207395	351111
A6	3	173603	338803
A7	3	180460	324702
A8	3	206256	362247
A9	3	203667	382422
A10	3	235449	406096
A11	3	239621	430645
A12	3	259267	455162
B1	3	251164	384254
B2	3	235205	363043
B3	3	212429	322027
B4	3	213961	354691
B5	3	205777	340891
B6	3	203170	346660
B7	3	192132	334952
B8	3	219438	375805
B9	3	223715	385262
B10	3	219220	418028
B11	3	237272	438855
B12	3	235878	422567
C1	3	312094	451605
C2	3	268343	403448
C3	3	238959	382557
C4	3	188459	311845
C5	3	222721	359228
C6	3	216073	368793
C7	3	179085	345007
C8	3	206874	405775
C9	3	213590	392043
C10	3	222969	416935
C11	3	237418	445171
C12	3	238738	456570
D1	3	370993	533456
D2	3	283050	419831
D3	3	269217	410948
D4	3	256214	401517
D5	3	263534	419314
D6	3	265534	427035
D7	3	215100	410373
D8	3	196122	371043
D9	3	205046	391153
D10	3	244412	441153
D11	3	238660	432186
D12	3	285531	511524
E1	3	364047	539225
E2	3	307388	462671
E3	3	290468	444366
E4	3	290672	467102
E5	3	272083	446435
E6	3	276947	467977
E7	3	238262	433005
E8	3	262548	472038
E9	3	260831	464208
E10	3	187500	445324
E11	3	247602	453949
E12	3	282877	521264
F1	3	350343	528023
F2	3	303155	466621
F3	3	302550	463764
F4	3	299954	477419
F5	3	303871	514257
F6	3	290309	482511
F7	3	246015	407424
F8	3	274498	451790
F9	3	294578	497537
F10	3	281086	514030
F11	3	276345	517860
F12	3	304184	562307
G1	3	358008	525143
G2	3	358818	518385
G3	3	354232	542604
G4	3	345848	518843
G5	3	302046	496585
G6	3	286710	499366
G7	3	247447	453214
G8	3	262602	490765
G9	3	274012	520171
G10	3	264070	462714
G11	3	259819	455498
G12	3	291154	550402
H1	3	411979	612607
H2	3	310457	503228
H3	3	331524	559962
H4	3
H5	3
H6	3
H7	3	244606	487981
H8	3	265483	485090
H9	3	286246	544690
H10	3
H11	3
H12	3
A1	4	262316	430672
A2	4	241924	370934
A3	4	196548	344091
A4	4	188953	346638
A5	4	208495	350484
A6	4	174225	338598
A7	4	181536	324726
A8	4	206555	362310
A9	4	204124	382199
A10	4	235936	405713
A11	4	239243	429413
A12	4	262232	459222
B1	4	250866	383784
B2	4	235673	362528
B3	4	213117	322336
B4	4	214779	355209
B5	4	206005	341578
B6	4	204278	346768
B7	4	193282	335698
B8	4	220487	376450
B9	4	224535	385564
B10	4	219854	419488
B11	4	237983	438968
B12	4	236583	421129
C1	4	311293	450555
C2	4	269342	403949
C3	4	239842	382899
C4	4	188797	312148
C5	4	223193	359275
C6	4	216792	369469
C7	4	179784	344878
C8	4	207415	405473
C9	4	214944	392464
C10	4	223902	417470
C11	4	237935	445540
C12	4	238979	455062
D1	4	370512	532246
D2	4	284628	420875
D3	4	269731	412541
D4	4	256492	402462
D5	4	264568	419869
D6	4	267316	428212
D7	4	216045	411060
D8	4	196645	371405
D9	4	205560	391673
D10	4	245775	441443
D11	4	240088	432887
D12	4	285361	509808
E1	4	364796	536981
E2	4	308773	463999
E3	4	291833	445556
E4	4	291832	468210
E5	4	272516	447276
E6	4	278461	468358
E7	4	239269	432397
E8	4	264114	472268
E9	4	261464	464126
E10	4	184365	444811
E11	4	248908	453928
E12	4	282683	519658
F1	4	350168	527324
F2	4	305221	467242
F3	4	304265	465041
F4	4	302043	477419
F5	4	305116	514639
F6	4	291353	483457
F7	4	247716	407714
F8	4	275263	452581
F9	4	296336	497912
F10	4	282228	515237
F11	4	276702	518141
F12	4	304341	561631
G1	4	357499	523354
G2	4	361315	519772
G3	4	355333	543860
G4	4	347134	520245
G5	4	302960	497181
G6	4	288390	501900
G7	4	249241	452855
G8	4	263917	491589
G9	4	275329	520236
G10	4	265103	464084
G11	4	260656	456311
G12	4	291176	549325
H1	4	411228	610954
H2	4	311126	501788
H3	4	332590	559220
H4	4
H5	4
H6	4
H7	4	244902	486853
H8	4	265838	484895
H9	4	287593	543641
H10	4
H11	4
H12	4
A1	5	262062	429911
A2	5	242373	370550
A3	5	197333	344286
A4	5	189729	346301
A5	5	209539	350797
A6	5	174295	339066
A7	5	182982	324928
A8	5	208165	362037
A9	5	205375	382139
A10	5	236718	406035
A11	5	240383	429422
A12	5	261894	459064
B1	5	250415	382730
B2	5	236946	363366
B3	5	214589	323078
B4	5	215510	355516
B5	5	207274	342014
B6	5	204911	347368
B7	5	194418	335658
B8	5	221422	376664
B9	5	225628	386481
B10	5	221554	421088
B11	5	239012	439663
B12	5	236420	420695
C1	5	311760	449802
C2	5	270891	403930
C3	5	240943	383494
C4	5	189739	312581
C5	5	224660	360189
C6	5	218110	369814
C7	5	180642	344929
C8	5	208399	406091
C9	5	216351	393186
C10	5	225758	418891
C11	5	239304	446576
C12	5	240580	455858
D1	5	370571	532241
D2	5	285571	421342
D3	5	271534	413466
D4	5	258253	403470
D5	5	265940	420881
D6	5	268758	429399
D7	5	217461	411296
D8	5	198129	371681
D9	5	206557	392380
D10	5	247180	442457
D11	5	241288	433819
D12	5	286443	509109
E1	5	365555	536921
E2	5	310483	464679
E3	5	293104	446639
E4	5	293079	469222
E5	5	274015	447242
E6	5	280242	469118
E7	5	240521	432791
E8	5	264728	473290
E9	5	262455	464971
E10	5	181977	443522
E11	5	250316	455087
E12	5	283415	519172
F1	5	350850	525983
F2	5	306470	468107
F3	5	305946	465144
F4	5	302790	478920
F5	5	306355	515245
F6	5	293025	484080
F7	5	248866	408053
F8	5	276988	453305
F9	5	297585	498290
F10	5	283625	516507
F11	5	278268	519054
F12	5	304935	560552
G1	5	357272	522700
G2	5	362880	521766
G3	5	356959	545202
G4	5	349718	521568
G5	5	304294	498117
G6	5	290155	503376
G7	5	250044	454129
G8	5	265098	492189
G9	5	276364	520582
G10	5	267277	464584
G11	5	262346	456743
G12	5	291308	546866
H1	5	412039	609807
H2	5	311483	501868
H3	5	333346	559502
H4	5
H5	5
H6	5
H7	5	245417	485312
H8	5	267193	484938
H9	5	287657	542887
H10	5
H11	5
H12	5
A1	6	261396	428617
A2	6	242413	370875
A3	6	197456	344126
A4	6	189536	345977
A5	6	210342	351269
A6	6	175124	338881
A7	6	183352	324774
A8	6	208857	362575
A9	6	205524	382443
A10	6	237557	405777
A11	6	240024	428868
A12	6	262868	457410
B1	6	250687	382113
B2	6	237341	363778
B3	6	215740	323192
B4	6	215874	356074
B5	6	208077	342208
B6	6	205689	347668
B7	6	195263	335624
B8	6	222198	376567
B9	6	226506	387130
B10	6	222089	422245
B11	6	239381	440141
B12	6	236686	420351
C1	6	311889	449203
C2	6	271805	404759
C3	6	241501	383938
C4	6	189919	313029
C5	6	225461	360202
C6	6	218804	370290
C7	6	181076	344701
C8	6	208901	405660
C9	6	217170	393884
C10	6	226773	419578
C11	6	239739	447014
C12	6	241042	455763
D1	6	371023	531487
D2	6	287296	422363
D3	6	272560	414037
D4	6	259178	403866
D5	6	266749	421441
D6	6	270402	429743
D7	6	218230	411132
D8	6	198616	371654
D9	6	207271	392396
D10	6	248078	442646
D11	6	242418	434151
D12	6	287055	508737
E1	6	366653	536317
E2	6	311762	465579
E3	6	294269	447242
E4	6	294145	470174
E5	6	275082	447735
E6	6	281320	468887
E7	6	241473	433404
E8	6	266461	472923
E9	6	264062	465228
E10	6	179743	442632
E11	6	251186	455714
E12	6	283727	518168
F1	6	351360	525745
F2	6	307767	468354
F3	6	307043	466140
F4	6	303781	479428
F5	6	307934	515639
F6	6	294386	484268
F7	6	249120	407549
F8	6	277947	453039
F9	6	298593	498529
F10	6	284130	516916
F11	6	279677	519845
F12	6	305231	560531
G1	6	358247	522245
G2	6	364696	521025
G3	6	359076	545628
G4	6	350385	522275
G5	6	305612	497931
G6	6	292095	505296
G7	6	250782	453945
G8	6	266087	492652
G9	6	277343	520097
G10	6	267675	465460
G11	6	263861	457040
G12	6	291972	546569
H1	6	411036	608070
H2	6	312358	500660
H3	6	335239	558587
H4	6
H5	6
H6	6
H7	6	246107	484754
H8	6	267992	485186
H9	6	289085	542758
H10	6
H11	6
H12	6
A1	7	261635	427140
A2	7	243418	370826
A3	7	198746	344009
A4	7	190401	346244
A5	7	211135	351246
A6	7	175452	338656
A7	7	184463	325178
A8	7	208847	361736
A9	7	206395	382257
A10	7	238145	405770
A11	7	240766	428175
A12	7	262826	455711
B1	7	250940	381508
B2	7	238260	363148
B3	7	216754	323754
B4	7	216137	356392
B5	7	208930	342344
B6	7	206569	347615
B7	7	196245	335909
B8	7	223134	377144
B9	7	227667	387245
B10	7	222865	423290
B11	7	239753	440446
B12	7	237360	419640
C1	7	312434	448469
C2	7	272329	404749
C3	7	241982	384420
C4	7	190192	313007
C5	7	226543	360301
C6	7	219428	370736
C7	7	181698	344598
C8	7	209780	406088
C9	7	217783	394032
C10	7	227367	420470
C11	7	240941	447763
C12	7	241686	455191
D1	7	371286	531150
D2	7	287778	421810
D3	7	273457	414774
D4	7	260576	404625
D5	7	268108	421653
D6	7	271502	430784
D7	7	218564	411263
D8	7	199476	372076
D9	7	208024	393060
D10	7	248522	443926
D11	7	243369	435105
D12	7	287743	508218
E1	7	368353	535907
E2	7	313335	465426
E3	7	295537	448024
E4	7	294762	470154
E5	7	276464	447817
E6	7	282496	469416
E7	7	242548	432221
E8	7	267382	473294
E9	7	264486	465227
E10	7	177978	441301
E11	7	252285	456099
E12	7	284075	517287
F1	7	351671	525395
F2	7	308812	468634
F3	7	308414	466563
F4	7	304572	479204
F5	7	309040	516680
F6	7	295209	484123
F7	7	250715	408262
F8	7	278465	453342
F9	7	299942	498585
F10	7	284847	517555
F11	7	281021	520306
F12	7	305776	558905
G1	7	357960	521481
G2	7	366787	522254
G3	7	360715	546567
G4	7	352149	522092
G5	7	306535	498324
G6	7	293124	507162
G7	7	251155	454233
G8	7	267074	492634
G9	7	278057	520304
G10	7	269019	465260
G11	7	265032	457592
G12	7	292183	545827
H1	7	412294	605957
H2	7	313182	500027
H3	7	336082	558117
H4	7
H5	7
H6	7
H7	7	245877	484771
H8	7	268074	485341
H9	7	289360	542860
H10	7
H11	7
H12	7
A1	8	261773	426526
A2	8	244178	370373
A3	8	199344	344293
A4	8	191018	346389
A5	8	212065	351074
A6	8	176259	338982
A7	8	185069	325146
A8	8	209447	362159
A9	8	207334	382371
A10	8	238602	405687
A11	8	241932	428720
A12	8	260882	451032
B1	8	251218	381558
B2	8	239158	363314
B3	8	217416	324065
B4	8	216738	356331
B5	8	209385	342431
B6	8	207159	347960
B7	8	196720	336227
B8	8	223494	376917
B9	8	228041	387257
B10	8	223127	424990
B11	8	239781	440460
B12	8	238053	419625
C1	8	312348	448160
C2	8	273469	404624
C3	8	243456	384504
C4	8	190494	313545
C5	8	227022	360013
C6	8	220182	371093
C7	8	181962	345102
C8	8	210099	406152
C9	8	218649	394241
C10	8	227715	420451
C11	8	241340	447433
C12	8	242152	454878
D1	8	371990	531400
D2	8	289486	422580
D3	8	274687	415320
D4	8	261052	404725
D5	8	268861	421601
D6	8	272851	430578
D7	8	219828	411601
D8	8	200545	372042
D9	8	209352	393106
D10	8	250088	443602
D11	8	244439	435328
D12	8	288497	508584
E1	8	369404	536268
E2	8	314206	465658
E3	8	296641	447722
E4	8	296031	470260
E5	8	276910	448476
E6	8	283739	469587
E7	8	243741	432761
E8	8	268300	473477
E9	8	265920	465567
E10	8	175860	440167
E11	8	253725	456083
E12	8	284349	517969
F1	8	352642	525781
F2	8	309885	468958
F3	8	309432	466059
F4	8	305459	479798
F5	8	310125	516647
F6	8	296612	485190
F7	8	251111	407936
F8	8	279205	453708
F9	8	300837	498471
F10	8	285974	518276
F11	8	281700	520456
F12	8	306117	559429
G1	8	357804	519875
G2	8	367576	522942
G3	8	360973	546972
G4	8	353686	522753
G5	8	307575	499132
G6	8	294552	508925
G7	8	252163	454353
G8	8	267774	493879
G9	8	278819	520774
G10	8	270152	465788
G11	8	266091	457986
G12	8	292604	545837
H1	8	412246	605251
H2	8	314430	499858
H3	8	336447	558568
H4	8
H5	8
H6	8
H7	8	246147	483728
H8	8	269256	485042
H9	8	290062	542305
H10	8
H11	8
H12	8
A1	9	261496	425365
A2	9	244228	370297
A3	9	199961	343912
A4	9	190957	345549
A5	9	212509	351497
A6	9	176434	339373
A7	9	186019	325533
A8	9	210614	362384
A9	9	207248	382567
A10	9	239270	405858
A11	9	241555	428587
A12	9	263170	454980
B1	9	251688	380631
B2	9	239683	363123
B3	9	218277	323797
B4	9	217776	356258
B5	9	210264	342607
B6	9	207358	348653
B7	9	197909	336345
B8	9	224566	377060
B9	9	229211	387734
B10	9	224569	425844
B11	9	240805	440325
B12	9	238132	419403
C1	9	313439	447789
C2	9	274599	404373
C3	9	244208	384604
C4	9	191290	313594
C5	9	227464	360383
C6	9	220553	371139
C7	9	182974	344982
C8	9	211037	405978
C9	9	219610	394417
C10	9	228470	419228
C11	9	242248	447668
C12	9	242330	455399
D1	9	372099	531414
D2	9	290703	423055
D3	9	275012	415313
D4	9	262398	405242
D5	9	270411	422514
D6	9	273834	431162
D7	9	220775	411687
D8	9	201261	372242
D9	9	210042	393068
D10	9	250341	443983
D11	9	245543	435482
D12	9	289479	508258
E1	9	370350	534920
E2	9	315281	466541
E3	9	297872	449015
E4	9	297124	470370
E5	9	277856	448046
E6	9	284442	470044
E7	9	243698	432817
E8	9	269744	473500
E9	9	267074	465870
E10	9	173449	438774
E11	9	254584	456089
E12	9	285527	517227
F1	9	353024	524258
F2	9	310866	469215
F3	9	311649	466633
F4	9	306689	479687
F5	9	311287	516620
F6	9	297732	484716
F7	9	252028	407663
F8	9	280150	453611
F9	9	301675	498790
F10	9	286877	518813
F11	9	282773	519950
F12	9	306707	559596
G1	9	357870	520520
G2	9	368897	523897
G3	9	362319	547619
G4	9	353968	522842
G5	9	308281	498856
G6	9	296623	510888
G7	9	252766	454841
G8	9	268503	493209
G9	9	279385	520362
G10	9	270104	466113
G11	9	266676	458479
G12	9	293112	545199
H1	9	413274	604015
H2	9	315196	499331
H3	9	338238	558488
H4	9
H5	9
H6	9
H7	9	246327	483228
H8	9	269732	485112
H9	9	290671	542018
H10	9
H11	9
H12	9
A1	10	262072	424281
A2	10	245520	370525
A3	10	200837	343869
A4	10	191405	345775
A5	10	213483	351162
A6	10	176751	338929
A7	10	186398	325123
A8	10	211101	362450
A9	10	208122	382509
A10	10	239301	406334
A11	10	242194	428230
A12	10	263837	453048
B1	10	251291	380719
B2	10	240530	362533
B3	10	219054	324138
B4	10	217894	356403
B5	10	210488	342342
B6	10	208098	348647
B7	10	198282	336388
B8	10	224963	376687
B9	10	229732	387548
B10	10	224779	427374
B11	10	241044	440468
B12	10	238829	419149
C1	10	313122	447519
C2	10	275337	404519
C3	10	244758	384991
C4	10	191256	312941
C5	10	228001	360144
C6	10	220814	370972
C7	10	183486	344378
C8	10	211547	405635
C9	10	220168	394674
C10	10	229084	421455
C11	10	242068	447296
C12	10	243166	455681
D1	10	373074	530965
D2	10	290808	422658
D3	10	276298	415943
D4	10	262426	405180
D5	10	271039	422697
D6	10	274961	431162
D7	10	221222	411917
D8	10	201941	372410
D9	10	210129	393053
D10	10	251322	444161
D11	10	246555	435548
D12	10	289832	507865
E1	10	372124	535414
E2	10	316302	466754
E3	10	298876	449295
E4	10	297518	470527
E5	10	278840	448628
E6	10	285518	469435
E7	10	245134	432090
E8	10	271072	473445
E9	10	267596	465835
E10	10	172705	437368
E11	10	255490	455815
E12	10	285918	516883
F1	10	354877	524538
F2	10	312090	469009
F3	10	312117	466553
F4	10	307656	479769
F5	10	312653	516425
F6	10	299273	485165
F7	10	252786	407857
F8	10	280907	453372
F9	10	302045	498531
F10	10	287415	518599
F11	10	282745	521015
F12	10	307303	559734
G1	10	358222	519958
G2	10	370815	523039
G3	10	363583	546857
G4	10	355589	522593
G5	10	309547	498915
G6	10	297892	512590
G7	10	253626	454183
G8	10	269213	493807
G9	10	280062	520928
G10	10	271391	466350
G11	10	267041	458406
G12	10	293987	543772
H1	10	412870	602317
H2	10	316099	498866
H3	10	339748	558751
H4	10
H5	10
H6	10
H7	10	247083	482997
H8	10	270297	484968
H9	10	291749	542152
H10	10
H11	10
H12	10
A1	11	261416	422823
A2	11	245475	370284
A3	11	200516	344119
A4	11	191452	345684
A5	11	214346	351502
A6	11	177197	338911
A7	11	186825	324989
A8	11	211434	361500
A9	11	208456	382351
A10	11	239767	405557
A11	11	242096	428258
A12	11	261087	448655
B1	11	251217	379860
B2	11	240949	362995
B3	11	219471	324009
B4	11	217873	356164
B5	11	211031	342498
B6	11	208342	348251
B7	11	199139	336190
B8	11	225462	377039
B9	11	229917	387800
B10	11	225562	427958
B11	11	240984	440954
B12	11	238781	419425
C1	11	313243	446644
C2	11	274787	403652
C3	11	244660	384561
C4	11	191112	313641
C5	11	228606	360107
C6	11	221418	371359
C7	11	183954	344667
C8	11	212504	405663
C9	11	220465	394902
C10	11	228226	418045
C11	11	243049	447610
C12	11	243824	455484
D1	11	372917	530266
D2	11	291280	422667
D3	11	276714	415756
D4	11	263661	405508
D5	11	271714	422432
D6	11	275490	431493
D7	11	221933	411357
D8	11	202426	372202
D9	11	210721	392912
D10	11	251818	444489
D11	11	247305	436095
D12	11	290677	507452
E1	11	372663	534533
E2	11	317541	466570
E3	11	299596	448355
E4	11	298359	470222
E5	11	279366	447971
E6	11	286132	469847
E7	11	245316	432475
E8	11	271685	473468
E9	11	268110	465928
E10	11	171217	436067
E11	11	255588	455789
E12	11	286839	516016
F1	11	353970	523981
F2	11	312736	468598
F3	11	313282	466433
F4	11	308152	480206
F5	11	312695	516389
F6	11	299651	485005
F7	11	253567	407861
F8	11	281779	452996
F9	11	303449	498213
F10	11	287227	518772
F11	11	284117	520652
F12	11	307932	558162
G1	11	357426	520306
G2	11	371748	523684
G3	11	364076	548055
G4	11	356602	523152
G5	11	310674	498834
G6	11	299523	514894
G7	11	254116	454405
G8	11	269522	493682
G9	11	280307	520656
G10	11	271509	466305
G11	11	268696	458278
G12	11	294423	543999
H1	11	412893	602623
H2	11	316608	499625
H3	11	339809	559150
H4	11
H5	11
H6	11
H7	11	246808	483097
H8	11	270607	484984
H9	11	292323	541584
H10	11
H11	11
H12	11
A1	12	261714	422407
A2	12	246494	370272
A3	12	201401	344059
A4	12	191589	345442
A5	12	214330	351482
A6	12	177738	339186
A7	12	187261	324797
A8	12	212076	362190
A9	12	208579	382491
A10	12	240254	405595
A11	12	242762	428216
A12	12	263908	451546
B1	12	250528	380063
B2	12	241325	362656
B3	12	220217	324175
B4	12	218109	356253
B5	12	211704	342554
B6	12	209071	348503
B7	12	199479	336539
B8	12	225658	377242
B9	12	230564	387583
B10	12	226559	429558
B11	12	241361	440386
B12	12	239261	418567
C1	12	313410	446671
C2	12	276037	403710
C3	12	244831	384788
C4	12	191495	313470
C5	12	228690	360441
C6	12	221714	371512
C7	12	184011	344663
C8	12	212889	405510
C9	12	221079	394814
C10	12	229650	420906
C11	12	243441	447770
C12	12	244013	454751
D1	12	372347	530164
D2	12	291498	422677
D3	12	277273	415737
D4	12	264742	405047
D5	12	272135	422358
D6	12	276303	432186
D7	12	222678	411275
D8	12	202883	372118
D9	12	211081	393018
D10	12	251849	444294
D11	12	247699	435963
D12	12	291222	507770
E1	12	373166	535707
E2	12	318040	466162
E3	12	300534	448953
E4	12	298715	470495
E5	12	280014	447643
E6	12	286322	469867
E7	12	245697	432260
E8	12	271813	473375
E9	12	268855	465653
E10	12	169692	434733
E11	12	256298	455733
E12	12	286421	516091
F1	12	354874	523690
F2	12	313284	469016
F3	12	313139	466809
F4	12	308535	479839
F5	12	313650	516569
F6	12	300294	485204
F7	12	254021	407699
F8	12	281978	453190
F9	12	303655	497987
F10	12	287711	518767
F11	12	284411	520812
F12	12	307747	559121
G1	12	357520	519993
G2	12	371665	523960
G3	12	365128	547967
G4	12	356756	522736
G5	12	310969	498728
G6	12	300984	516742
G7	12	253969	454324
G8	12	270040	493447
G9	12	280440	520657
G10	12	271814	465628
G11	12	268658	457835
G12	12	294389	544138
H1	12	413280	601535
H2	12	317600	498610
H3	12	341114	558900
H4	12
H5	12
H6	12
H7	12	247377	482832
H8	12	271231	484527
H9	12	292798	541886
H10	12
H11	12
H12	12
A1	13	261692	422036
A2	13	246675	370461
A3	13	201694	344107
A4	13	192258	345161
A5	13	215193	350990
A6	13	178360	338836
A7	13	187663	324913
A8	13	212339	362292
A9	13	209199	382470
A10	13	239876	405514
A11	13	242965	428526
A12	13	264141	451316
B1	13	251463	379932
B2	13	241797	363075
B3	13	220516	324054
B4	13	218606	356524
B5	13	212092	342870
B6	13	208972	348768
B7	13	199386	336355
B8	13	226300	377393
B9	13	231031	387903
B10	13	226711	430338
B11	13	242617	441015
B12	13	239516	418494
C1	13	313581	445667
C2	13	275979	403998
C3	13	245868	384779
C4	13	191528	313521
C5	13	229406	360103
C6	13	222133	371619
C7	13	184608	344563
C8	13	212964	405181
C9	13	221785	394579
C10	13	230046	420754
C11	13	243862	447577
C12	13	243990	455352
D1	13	373092	530285
D2	13	292393	422754
D3	13	277805	415906
D4	13	264710	405612
D5	13	273340	422651
D6	13	276865	432224
D7	13	222969	410997
D8	13	203762	371887
D9	13	211899	393218
D10	13	252164	444689
D11	13	247688	436047
D12	13	290992	507703
E1	13	373745	534852
E2	13	318865	466761
E3	13	301289	449097
E4	13	299579	470520
E5	13	281043	447650
E6	13	287512	469575
E7	13	246129	431903
E8	13	273120	473308
E9	13	269347	465515
E10	13	168408	433952
E11	13	257159	455269
E12	13	287232	515263
F1	13	354397	524374
F2	13	314282	469140
F3	13	314171	467310
F4	13	309223	480032
F5	13	314159	516292
F6	13	301152	485063
F7	13	254482	407376
F8	13	283065	453289
F9	13	303881	498495
F10	13	288117	519245
F11	13	284846	521270
F12	13	308115	558240
G1	13	357474	519129
G2	13	372520	524232
G3	13	365740	549187
G4	13	358091	523245
G5	13	311471	499426
G6	13	302421	518744
G7	13	255231	454816
G8	13	269939	494191
G9	13	281354	521009
G10	13	272554	465743
G11	13	269700	458392
G12	13	295244	543594
H1	13	413007	600658
H2	13	318451	498681
H3	13	341843	559352
H4	13
H5	13
H6	13
H7	13	247001	482435
H8	13	270927	485198
H9	13	292482	542214
H10	13
H11	13
H12	13
A1	14	262353	421344
A2	14	247086	369869
A3	14	202253	344044
A4	14	192218	345314
A5	14	215446	351127
A6	14	178431	338962
A7	14	187816	325039
A8	14	212518	362171
A9	14	208619	382594
A10	14	240119	405725
A11	14	242875	427911
A12	14	263273	451117
B1	14	251360	379528
B2	14	242294	363015
B3	14	221272	324847
B4	14	219212	355995
B5	14	212773	342443
B6	14	209307	348571
B7	14	200679	336357
B8	14	226869	377087
B9	14	231179	387790
B10	14	227145	431414
B11	14	242603	440573
B12	14	239527	418833
C1	14	313860	445842
C2	14	276294	404001
C3	14	246083	384714
C4	14	191917	313589
C5	14	229326	359934
C6	14	222088	371736
C7	14	184852	344983
C8	14	213596	405795
C9	14	222123	394868
C10	14	230280	420061
C11	14	243872	448280
C12	14	245054	455672
D1	14	372833	530710
D2	14	292752	422768
D3	14	277998	416439
D4	14	265140	406007
D5	14	273707	422728
D6	14	277915	432075
D7	14	223350	411350
D8	14	204216	372064
D9	14	212433	393037
D10	14	252507	445158
D11	14	248979	436333
D12	14	291804	507831
E1	14	374791	534724
E2	14	319277	466762
E3	14	301667	448763
E4	14	300319	470657
E5	14	280660	448125
E6	14	287901	469893
E7	14	246713	432388
E8	14	273549	473679
E9	14	269974	465380
E10	14	167247	432651
E11	14	257219	456253
E12	14	287430	514963
F1	14	354856	523787
F2	14	314992	468964
F3	14	315173	466503
F4	14	310033	479376
F5	14	314784	516171
F6	14	301983	485266
F7	14	254640	407415
F8	14	283364	452690
F9	14	304440	497972
F10	14	288414	519004
F11	14	285733	520857
F12	14	308801	558210
G1	14	357159	518894
G2	14	372877	524994
G3	14	366071	549175
G4	14	358461	523379
G5	14	312455	499357
G6	14	303440	521446
G7	14	254962	454732
G8	14	270608	493632
G9	14	281440	520114
G10	14	272836	466232
G11	14	269688	459333
G12	14	295128	542791
H1	14	413340	599316
H2	14	318496	498322
H3	14	342904	559484
H4	14
H5	14
H6	14
H7	14	247319	482054
H8	14	272195	485146
H9	14	293064	541909
H10	14
H11	14
H12	14
A1	15	261974	420165
A2	15	248129	370063
A3	15	202775	344393
A4	15	192525	345218
A5	15	215443	351252
A6	15	178550	339270
A7	15	187998	325052
A8	15	213162	362304
A9	15	209595	381888
A10	15	240389	405726
A11	15	242544	428187
A12	15	262591	447022
B1	15	251439	379228
B2	15	242035	362738
B3	15	221769	324736
B4	15	219623	356275
B5	15	213020	342678
B6	15	209889	349023
B7	15	200471	336425
B8	15	226916	377244
B9	15	232102	388481
B10	15	227753	432634
B11	15	242772	440677
B12	15	240280	418920
C1	15	313979	445405
C2	15	277040	404034
C3	15	246443	384752
C4	15	192344	313706
C5	15	229781	360259
C6	15	223222	371659
C7	15	184973	344672
C8	15	213590	405596
C9	15	222668	395243
C10	15	230154	419153
C11	15	244209	447974
C12	15	245458	455185
D1	15	373471	529512
D2	15	293443	422938
D3	15	278713	416564
D4	15	266670	406078
D5	15	274161	423093
D6	15	278427	432860
D7	15	223947	411430
D8	15	204720	372478
D9	15	212789	392952
D10	15	253244	444949
D11	15	249050	437032
D12	15	291995	507610
E1	15	374839	535412
E2	15	319460	467273
E3	15	302271	448548
E4	15	300223	470712
E5	15	281718	447298
E6	15	289056	469938
E7	15	247155	431875
E8	15	274045	473665
E9	15	270370	465684
E10	15	167045	431578
E11	15	258348	455448
E12	15	287617	515545
F1	15	355907	523256
F2	15	315554	469386
F3	15	315448	466850
F4	15	310413	479461
F5	15	315827	516639
F6	15	302386	485486
F7	15	255134	407650
F8	15	284409	452987
F9	15	305070	497572
F10	15	288380	519198
F11	15	286091	521520
F12	15	308447	558309
G1	15	357893	519827
G2	15	374096	524211
G3	15	366641	549304
G4	15	359199	523398
G5	15	313223	499168
G6	15	305070	523469
G7	15	255374	455123
G8	15	270830	494085
G9	15	282182	520125
G10	15	273533	465735
G11	15	270162	458689
G12	15	295865	543008
H1	15	413801	599395
H2	15	318872	498645
H3	15	343473	559462
H4	15
H5	15
H6	15
H7	15	247448	482268
H8	15	272681	485340
H9	15	293548	541549
H10	15
H11	15
H12	15
A1	16	262209	419097
A2	16	248216	369899
A3	16	203635	344198
A4	16	192543	345148
A5	16	215630	351442
A6	16	178988	339187
A7	16	188836	325191
A8	16	213128	361947
A9	16	209337	382222
A10	16	241050	405548
A11	16	242961	428598
A12	16	259939	444151
B1	16	251711	379398
B2	16	243213	362800
B3	16	222128	324583
B4	16	218990	356157
B5	16	213056	342653
B6	16	209847	349042
B7	16	200835	336989
B8	16	226796	377486
B9	16	232398	388408
B10	16	227939	433790
B11	16	242903	440980
B12	16	239841	418496
C1	16	313369	444738
C2	16	277356	403402
C3	16	246820	385122
C4	16	192703	313711
C5	16	229724	360175
C6	16	222942	371724
C7	16	185013	344813
C8	16	214336	405517
C9	16	223160	394678
C10	16	230561	418729
C11	16	244687	448114
C12	16	245939	455725
D1	16	372963	529778
D2	16	293715	422950
D3	16	278717	416510
D4	16	266643	405968
D5	16	274620	422744
D6	16	278896	432739
D7	16	224395	411454
D8	16	204941	372544
D9	16	212948	393258
D10	16	253708	444936
D11	16	250220	436933
D12	16	293025	507240
E1	16	375712	534786
E2	16	319701	466488
E3	16	302796	449089
E4	16	300736	470877
E5	16	281843	447632
E6	16	289140	469393
E7	16	247892	431638
E8	16	274631	473568
E9	16	271178	465940
E10	16	166316	430574
E11	16	258722	455770
E12	16	288105	515568
F1	16	355877	524088
F2	16	316210	469014
F3	16	315980	466639
F4	16	310688	479535
F5	16	315966	516405
F6	16	302673	485146
F7	16	255628	406855
F8	16	284424	452512
F9	16	304990	498077
F10	16	288638	519405
F11	16	286580	521124
F12	16	309405	558617
G1	16	357578	519747
G2	16	374663	524927
G3	16	366942	548888
G4	16	359438	523370
G5	16	312802	498513
G6	16	306207	526129
G7	16	255891	454907
G8	16	271162	493842
G9	16	282621	519876
G10	16	273641	465669
G11	16	271197	459013
G12	16	295843	542731
H1	16	413348	598609
H2	16	319317	498717
H3	16	344694	559265
H4	16
H5	16
H6	16
H7	16	247317	481834
H8	16	272403	484612
H9	16	294111	541624
H10	16
H11	16
H12	16
A1	17	262395	418581
A2	17	248071	369990
A3	17	203431	344015
A4	17	192949	344650
A5	17	216108	351384
A6	17	178986	339121
A7	17	188712	324824
A8	17	213398	361943
A9	17	209131	382670
A10	17	240765	405378
A11	17	243332	428267
A12	17	261680	445346
B1	17	251495	378927
B2	17	243238	362666
B3	17	222460	325160
B4	17	219512	356305
B5	17	213415	342709
B6	17	209986	348814
B7	17	201138	336369
B8	17	227468	377219
B9	17	232900	388485
B10	17	228443	434502
B11	17	243254	440737
B12	17	240648	418787
C1	17	314237	444925
C2	17	277193	402714
C3	17	246811	384830
C4	17	192588	313892
C5	17	230442	360635
C6	17	223133	371793
C7	17	185032	344550
C8	17	214201	405605
C9	17	223700	394744
C10	17	230595	419995
C11	17	244447	448108
C12	17	246042	455679
D1	17	373961	529531
D2	17	294418	422679
D3	17	279159	416985
D4	17	266758	406080
D5	17	274783	423235
D6	17	279420	433214
D7	17	224433	411374
D8	17	205434	372434
D9	17	213260	393255
D10	17	253916	445147
D11	17	250029	436497
D12	17	293105	507502
E1	17	376816	535267
E2	17	320408	467091
E3	17	303079	449060
E4	17	301189	471217
E5	17	282668	447341
E6	17	289504	469732
E7	17	248246	431389
E8	17	275104	473149
E9	17	271375	465247
E10	17	165232	428995
E11	17	259329	455272
E12	17	288362	514745
F1	17	356633	522619
F2	17	316567	469072
F3	17	317210	467247
F4	17	311350	479852
F5	17	316655	516343
F6	17	302830	485357
F7	17	255838	407099
F8	17	284678	452829
F9	17	305111	497455
F10	17	288946	519750
F11	17	286881	521338
F12	17	309041	558126
G1	17	357278	519490
G2	17	374531	525396
G3	17	367477	549299
G4	17	359484	523744
G5	17	313502	498845
G6	17	307393	528072
G7	17	255788	454747
G8	17	271359	493818
G9	17	282958	520274
G10	17	273753	465554
G11	17	271928	459179
G12	17	296760	542683
H1	17	413483	597833
H2	17	319464	499138
H3	17	345049	559565
H4	17
H5	17
H6	17
H7	17	247571	482092
H8	17	272202	485546
H9	17	294250	542049
H10	17
H11	17
H12	17
A1	18	262683	417990
A2	18	248475	369521
A3	18	203209	343990
A4	18	193021	345287
A5	18	216359	351241
A6	18	179150	339143
A7	18	188915	325418
A8	18	213898	361958
A9	18	209624	382185
A10	18	240264	405366
A11	18	243507	428615
A12	18	262244	445095
B1	18	250919	378629
B2	18	243325	362703
B3	18	222302	324842
B4	18	219826	356236
B5	18	213825	343007
B6	18	210479	349164
B7	18	201521	336585
B8	18	228099	377247
B9	18	233545	388606
B10	18	228825	436290
B11	18	243385	440600
B12	18	240699	418436
C1	18	313963	444164
C2	18	277399	403319
C3	18	247311	385068
C4	18	192273	313700
C5	18	230765	360162
C6	18	223558	372292
C7	18	185379	344697
C8	18	214596	405535
C9	18	223836	394944
C10	18	230751	419680
C11	18	244708	447858
C12	18	246226	455759
D1	18	372883	529718
D2	18	294552	423017
D3	18	279422	416534
D4	18	267160	406118
D5	18	275518	422812
D6	18	279953	432973
D7	18	224695	411120
D8	18	205889	372033
D9	18	213842	392828
D10	18	253979	445047
D11	18	250384	437286
D12	18	293033	507247
E1	18	377570	534378
E2	18	320729	466933
E3	18	303953	448962
E4	18	301338	470618
E5	18	282774	447440
E6	18	290289	469853
E7	18	247982	431623
E8	18	276111	473151
E9	18	271945	465797
E10	18	165143	428030
E11	18	259415	455394
E12	18	288720	515291
F1	18	355380	523844
F2	18	316206	468536
F3	18	316735	467104
F4	18	311675	479572
F5	18	317034	516335
F6	18	303619	485017
F7	18	255992	406557
F8	18	284706	452296
F9	18	305610	497020
F10	18	288942	519502
F11	18	287218	521416
F12	18	309591	558644
G1	18	356337	519859
G2	18	375062	525216
G3	18	367555	549382
G4	18	360209	524129
G5	18	313687	498714
G6	18	308884	530508
G7	18	256463	454875
G8	18	271778	494321
G9	18	282973	520465
G10	18	274058	465669
G11	18	272145	459137
G12	18	296819	542597
H1	18	412909	597301
H2	18	319258	498737
H3	18	344562	559466
H4	18
H5	18
H6	18
H7	18	247239	481412
H8	18	273010	485275
H9	18	294533	541949
H10	18
H11	18
H12	18
A1	19	261702	417832
A2	19	249103	370040
A3	19	203660	343917
A4	19	192890	344761
A5	19	216924	351338
A6	19	179659	339078
A7	19	189485	325237
A8	19	213880	361803
A9	19	209181	382014
A10	19	240891	405631
A11	19	243519	428122
A12	19	263941	448043
B1	19	251098	378299
B2	19	243989	361767
B3	19	223384	325010
B4	19	219299	355936
B5	19	213997	342792
B6	19	210639	349036
B7	19	201451	336613
B8	19	228167	376854
B9	19	233659	388527
B10	19	229000	437517
B11	19	243428	440935
B12	19	240803	418504
C1	19	313394	443932
C2	19	277687	402948
C3	19	248126	385321
C4	19	192185	313790
C5	19	230548	359926
C6	19	223142	372108
C7	19	186157	344238
C8	19	214670	405403
C9	19	223799	395093
C10	19	230642	419331
C11	19	245032	447886
C12	19	246533	455968
D1	19	373477	529192
D2	19	295168	422483
D3	19	279285	416805
D4	19	267964	406380
D5	19	275776	422875
D6	19	280435	433572
D7	19	225288	411218
D8	19	206139	371809
D9	19	213689	392928
D10	19	254357	445272
D11	19	251069	436850
D12	19	294335	507377
E1	19	377327	534414
E2	19	321934	466986
E3	19	304712	448935
E4	19	301723	470890
E5	19	283205	447500
E6	19	290200	469745
E7	19	248607	430987
E8	19	276480	473493
E9	19	272269	465620
E10	19	164517	427547
E11	19	259855	455537
E12	19	289155	514278
F1	19	356143	523593
F2	19	317809	468363
F3	19	317746	466300
F4	19	311695	479327
F5	19	317702	516864
F6	19	303913	485210
F7	19	256199	406340
F8	19	285608	452334
F9	19	306171	496879
F10	19	289253	519667
F11	19	287646	521541
F12	19	309637	558010
G1	19	356513	520134
G2	19	376040	525730
G3	19	368003	549887
G4	19	360557	523726
G5	19	314145	498462
G6	19	309541	533014
G7	19	256109	454481
G8	19	271742	494508
G9	19	283116	520612
G10	19	273868	465555
G11	19	272142	459325
G12	19	297152	542510
H1	19	412564	597308
H2	19	319868	499008
H3	19	345890	559343
H4	19
H5	19
H6	19
H7	19	247366	481583
H8	19	273313	485663
H9	19	294891	542069
H10	19
H11	19
H12	19
A1	20	262044	417294
A2	20	249481	369752
A3	20	204560	343695
A4	20	192544	344609
A5	20	216772	350848
A6	20	179639	339005
A7	20	189160	324756
A8	20	213820	361718
A9	20	209868	382157
A10	20	240750	405003
A11	20	243904	428171
A12	20	262627	443866
B1	20	251993	378908
B2	20	244719	362003
B3	20	223810	324633
B4	20	220041	356017
B5	20	214115	342518
B6	20	210606	348524
B7	20	202490	336528
B8	20	228199	377419
B9	20	234303	388374
B10	20	229670	438489
B11	20	243564	441149
B12	20	240512	418374
C1	20	313899	443851
C2	20	278381	402755
C3	20	248040	384796
C4	20	192606	313632
C5	20	230679	360167
C6	20	223610	371967
C7	20	185795	344276
C8	20	215456	405471
C9	20	224626	395163
C10	20	230932	419415
C11	20	245228	448037
C12	20	246680	455853
D1	20	373196	528665
D2	20	295421	422876
D3	20	280253	417173
D4	20	267762	406572
D5	20	276476	423624
D6	20	280902	433338
D7	20	224835	411093
D8	20	206579	372330
D9	20	214219	393048
D10	20	254251	445649
D11	20	251468	437092
D12	20	294017	506604
E1	20	377964	534422
E2	20	321871	467184
E3	20	305495	448861
E4	20	302472	470857
E5	20	283611	447601
E6	20	291042	469714
E7	20	248505	431326
E8	20	276762	473535
E9	20	272984	465558
E10	20	164071	426047
E11	20	260337	454667
E12	20	289218	514034
F1	20	357178	522341
F2	20	317949	468184
F3	20	318416	465943
F4	20	312262	479985
F5	20	317678	516610
F6	20	304918	485145
F7	20	256729	406269
F8	20	286018	452248
F9	20	306600	496886
F10	20	289626	520242
F11	20	287994	521730
F12	20	309601	558479
G1	20	355855	519836
G2	20	376704	525553
G3	20	368478	550159
G4	20	360691	523368
G5	20	314840	498661
G6	20	310558	536078
G7	20	256589	454857
G8	20	272150	494322
G9	20	282783	520871
G10	20	274141	465181
G11	20	273148	459446
G12	20	297446	542442
H1	20	412258	596172
H2	20	320295	498669
H3	20	346203	559697
H4	20
H5	20
H6	20
H7	20	248101	481872
H8	20	273327	485197
H9	20	294884	542618
H10	20
H11	20
H12	20
A1	21	262733	416382
A2	21	249689	369143
A3	21	204985	343697
A4	21	192870	344555
A5	21	216820	351314
A6	21	179742	338733
A7	21	189510	325068
A8	21	213866	361826
A9	21	209637	381955
A10	21	241316	405117
A11	21	244106	428083
A12	21	259309	437926
B1	21	252413	377969
B2	21	245530	362007
B3	21	224043	324578
B4	21	220057	356235
B5	21	214199	342825
B6	21	210938	348730
B7	21	202357	336486
B8	21	228293	377533
B9	21	234791	388906
B10	21	230024	439295
B11	21	243493	441122
B12	21	241233	418702
C1	21	314484	442818
C2	21	278656	402679
C3	21	248924	384304
C4	21	192665	313959
C5	21	231262	359661
C6	21	223665	371813
C7	21	186266	344653
C8	21	215218	405150
C9	21	224536	395076
C10	21	231277	419265
C11	21	245246	447954
C12	21	246736	455807
D1	21	373205	529025
D2	21	295926	422459
D3	21	280685	416137
D4	21	268408	406586
D5	21	276874	422816
D6	21	281987	433388
D7	21	225524	410314
D8	21	206885	372225
D9	21	214333	392965
D10	21	254228	445331
D11	21	251920	436917
D12	21	293952	506817
E1	21	379686	534471
E2	21	323733	467101
E3	21	306766	448634
E4	21	302827	470050
E5	21	284391	446818
E6	21	291271	469406
E7	21	248984	430614
E8	21	277020	473234
E9	21	273085	465246
E10	21	163639	425153
E11	21	260834	454620
E12	21	289469	513506
F1	21	357159	523264
F2	21	319208	468023
F3	21	319044	466409
F4	21	312813	479374
F5	21	318311	515950
F6	21	305482	484890
F7	21	257188	405996
F8	21	285894	451661
F9	21	307281	496444
F10	21	289554	519694
F11	21	288339	521545
F12	21	310376	557509
G1	21	355995	520287
[truncated: 11,063 more rows]

## Sheet: Amplification Data
Block Type	96alum
Chemistry	SYBR_GREEN
Experiment File Name	D:\HAIFENG\CBF117.eds
Experiment Run End Time	2021-08-27 15:22:27 PM CST
Instrument Type	sds7500
Passive Reference	ROX
Well	Cycle	Target Name	Rn	ΔRn
A1	1	CBF3	0.610955	0.00691992
A1	2	CBF3	0.608549	0.00312542
A1	3	CBF3	0.606352	-0.000459332
A1	4	CBF3	0.609086	0.000885937
A1	5	CBF3	0.609573	-1.48155e-05
A1	6	CBF3	0.609858	-0.00111775
A1	7	CBF3	0.612528	0.000163328
A1	8	CBF3	0.613733	-2.01429e-05
A1	9	CBF3	0.614758	-0.000383321
A1	10	CBF3	0.617685	0.00115548
A1	11	CBF3	0.618264	0.000346165
A1	12	CBF3	0.619578	0.00027183
A1	13	CBF3	0.620071	-0.000622783
A1	14	CBF3	0.622659	0.000576514
A1	15	CBF3	0.623502	3.1303e-05
A1	16	CBF3	0.625653	0.000793818
A1	17	CBF3	0.626867	0.00062048
A1	18	CBF3	0.628442	0.000806737
A1	19	CBF3	0.626331	-0.00269212
A1	20	CBF3	0.627961	-0.00245049
A1	21	CBF3	0.63099	-0.000809585
A1	22	CBF3	0.632915	-0.000273151
A1	23	CBF3	0.637768	0.0031919
A1	24	CBF3	0.643864	0.00789887
A1	25	CBF3	0.659227	0.0218739
A1	26	CBF3	0.685161	0.0464199
A1	27	CBF3	0.733159	0.0930295
A1	28	CBF3	0.821347	0.17983
A1	29	CBF3	0.976455	0.333549
A1	30	CBF3	1.21363	0.569334
A1	31	CBF3	1.54182	0.896135
A1	32	CBF3	1.90124	1.25417
A1	33	CBF3	2.23644	1.58798
A1	34	CBF3	2.50919	1.85934
A1	35	CBF3	2.73904	2.0878
A1	36	CBF3	2.92615	2.27353
A1	37	CBF3	3.06852	2.41451
A1	38	CBF3	3.18549	2.53009
A1	39	CBF3	3.28023	2.62345
A1	40	CBF3	3.36237	2.70419
A2	1	CBF3	0.64992	0.00250534
A2	2	CBF3	0.648602	-0.000345994
A2	3	CBF3	0.648842	-0.00163837
A2	4	CBF3	0.652201	0.00018879
A2	5	CBF3	0.654091	0.000545738
A2	6	CBF3	0.653624	-0.00145313
A2	7	CBF3	0.656422	-0.000187507
A2	8	CBF3	0.659276	0.00113402
A2	9	CBF3	0.659548	-0.000127057
A2	10	CBF3	0.662628	0.00142091
A2	11	CBF3	0.662938	0.000197919
A2	12	CBF3	0.66571	0.00143767
A2	13	CBF3	0.665861	5.64882e-05
A2	14	CBF3	0.668037	0.000699777
A2	15	CBF3	0.670503	0.00163328
A2	16	CBF3	0.671036	0.000634044
A2	17	CBF3	0.670479	-0.00145566
A2	18	CBF3	0.672425	-0.00104203
A2	19	CBF3	0.673178	-0.00182108
A2	20	CBF3	0.674726	-0.00180573
A2	21	CBF3	0.676403	-0.00166145
A2	22	CBF3	0.680365	0.000768605
A2	23	CBF3	0.683604	0.00247476
A2	24	CBF3	0.689395	0.00673284
A2	25	CBF3	0.704981	0.020787
A2	26	CBF3	0.730486	0.0447592
A2	27	CBF3	0.776968	0.0897086
A2	28	CBF3	0.863038	0.174246
A2	29	CBF3	1.01296	0.322639
A2	30	CBF3	1.25194	0.560082
A2	31	CBF3	1.58338	0.889994
A2	32	CBF3	1.96908	1.27415
A2	33	CBF3	2.32409	1.62764
A2	34	CBF3	2.63199	1.934
A2	35	CBF3	2.88215	2.18263
A2	36	CBF3	3.08572	2.38466
A2	37	CBF3	3.24068	2.5381
A2	38	CBF3	3.36508	2.66097
A2	39	CBF3	3.46046	2.75481
A2	40	CBF3	3.55697	2.84979
A3	1	CBF3	0.56988	0.00220581
A3	2	CBF3	0.567963	-0.00121259
A3	3	CBF3	0.568563	-0.00211513
A3	4	CBF3	0.571211	-0.000969365
A3	5	CBF3	0.573167	-0.000515367
A3	6	CBF3	0.573791	-0.00139323
A3	7	CBF3	0.577734	0.00104786
A3	8	CBF3	0.578997	0.000808301
A3	9	CBF3	0.58143	0.00173884
A3	10	CBF3	0.584051	0.0028579
A3	11	CBF3	0.582694	-1.28142e-06
A3	12	CBF3	0.585368	0.00117095
A3	13	CBF3	0.586136	0.000437209
A3	14	CBF3	0.58787	0.000668583
A3	15	CBF3	0.588791	8.71887e-05
A3	16	CBF3	0.591623	0.0014172
A3	17	CBF3	0.591344	-0.00036404
A3	18	CBF3	0.590741	-0.00246899
A3	19	CBF3	0.592179	-0.00253296
A3	20	CBF3	0.595178	-0.0010357
A3	21	CBF3	0.596412	-0.00130393
A3	22	CBF3	0.599017	-0.000200955
A3	23	CBF3	0.603387	0.00266691
A3	24	CBF3	0.611481	0.0092587
A3	25	CBF3	0.623824	0.0200995
A3	26	CBF3	0.650352	0.045125
A3	27	CBF3	0.698243	0.0915144
A3	28	CBF3	0.787359	0.179128
A3	29	CBF3	0.941938	0.332205
A3	30	CBF3	1.18844	0.577209
A3	31	CBF3	1.532	0.91926
A3	32	CBF3	1.92807	1.31383
A3	33	CBF3	2.29469	1.67895
A3	34	CBF3	2.60096	1.98372
A3	35	CBF3	2.84894	2.23019
A3	36	CBF3	3.03932	2.41908
A3	37	CBF3	3.20127	2.57952
A3	38	CBF3	3.32137	2.69812
A3	39	CBF3	3.41239	2.78764
A3	40	CBF3	3.49008	2.86382
A4	1	CBF3	0.542833	-0.00260936
A4	2	CBF3	0.542398	-0.00379607
A4	3	CBF3	0.544042	-0.0029046
A4	4	CBF3	0.545103	-0.00259535
A4	5	CBF3	0.547873	-0.000576641
A4	6	CBF3	0.547828	-0.00137377
A4	7	CBF3	0.549905	-4.93371e-05
A4	8	CBF3	0.551456	0.000749982
A4	9	CBF3	0.552619	0.00116032
A4	10	CBF3	0.553555	0.00134446
A4	11	CBF3	0.553837	0.000875094
A4	12	CBF3	0.554619	0.00090438
A4	13	CBF3	0.55701	0.00254359
A4	14	CBF3	0.556646	0.00142817
A4	15	CBF3	0.557691	0.00172061
A4	16	CBF3	0.557855	0.00113251
A4	17	CBF3	0.559841	0.00236664
A4	18	CBF3	0.559017	0.000790838
A4	19	CBF3	0.55949	0.000511372
A4	20	CBF3	0.558733	-0.00099738
A4	21	CBF3	0.559766	-0.0007168
A4	22	CBF3	0.559986	-0.00124857
A4	23	CBF3	0.560641	-0.00134583
A4	24	CBF3	0.561554	-0.00118481
A4	25	CBF3	0.561426	-0.00206426
A4	26	CBF3	0.5615	-0.00274266
A4	27	CBF3	0.564812	-0.000182858
A4	28	CBF3	0.568201	0.00245491
A4	29	CBF3	0.577596	0.0110972
A4	30	CBF3	0.595092	0.0278411
A4	31	CBF3	0.629018	0.0610156
A4	32	CBF3	0.688581	0.119827
A4	33	CBF3	0.792686	0.22318
A4	34	CBF3	0.962161	0.391903
A4	35	CBF3	1.20632	0.635309
A4	36	CBF3	1.49144	0.919674
A4	37	CBF3	1.76078	1.18826
A4	38	CBF3	1.9886	1.41534
A4	39	CBF3	2.18169	1.60768
A4	40	CBF3	2.3391	1.76433
A5	1	CBF3	0.585833	-0.00829681
A5	2	CBF3	0.587895	-0.00746778
A5	3	CBF3	0.590681	-0.00591479
A5	4	CBF3	0.594879	-0.0029497
A5	5	CBF3	0.597323	-0.00173855
A5	6	CBF3	0.598806	-0.0014878
A5	7	CBF3	0.601104	-0.000422673
A5	8	CBF3	0.604045	0.00128493
A5	9	CBF3	0.604582	0.000589397
A5	10	CBF3	0.607932	0.00270643
A5	11	CBF3	0.609801	0.00334294
A5	12	CBF3	0.609789	0.0020985
A5	13	CBF3	0.613102	0.00417881
A5	14	CBF3	0.613584	0.00342785
A5	15	CBF3	0.613358	0.00196877
A5	16	CBF3	0.613558	0.000935818
A5	17	CBF3	0.615021	0.00116588
A5	18	CBF3	0.615986	0.000898249
A5	19	CBF3	0.617424	0.00110394
A5	20	CBF3	0.617851	0.000297477
A5	21	CBF3	0.617168	-0.0016184
A5	22	CBF3	0.617142	-0.00287685
A5	23	CBF3	0.619207	-0.00204442
A5	24	CBF3	0.620535	-0.0019493
A5	25	CBF3	0.620566	-0.00315183
A5	26	CBF3	0.623479	-0.00147087
A5	27	CBF3	0.627809	0.00162618
A5	28	CBF3	0.634033	0.00661717
A5	29	CBF3	0.647584	0.0189351
A5	30	CBF3	0.677104	0.0472225
A5	31	CBF3	0.729809	0.0986948
A5	32	CBF3	0.822003	0.189656
A5	33	CBF3	0.980981	0.347401
A5	34	CBF3	1.21758	0.582766
A5	35	CBF3	1.51152	0.875475
A5	36	CBF3	1.81069	1.17342
A5	37	CBF3	2.06933	1.43082
A5	38	CBF3	2.27325	1.6335
A5	39	CBF3	2.44268	1.80171
A5	40	CBF3	2.57044	1.92823
A6	1	CBF3	0.510476	-0.00234223
A6	2	CBF3	0.510303	-0.00341123
A6	3	CBF3	0.512402	-0.00220971
A6	4	CBF3	0.514548	-0.000960204
A6	5	CBF3	0.514045	-0.00235965
A6	6	CBF3	0.516772	-0.000529242
A6	7	CBF3	0.518084	-0.000113846
A6	8	CBF3	0.519967	0.000872144
A6	9	CBF3	0.519883	-0.000108282
A6	10	CBF3	0.521497	0.000609726
A6	11	CBF3	0.522843	0.00105856
A6	12	CBF3	0.524013	0.00133174
A6	13	CBF3	0.526389	0.00281197
A6	14	CBF3	0.526404	0.00192995
A6	15	CBF3	0.526278	0.000907385
A6	16	CBF3	0.527699	0.00143114
A6	17	CBF3	0.527793	0.000628636
A6	18	CBF3	0.528243	0.000182267
A6	19	CBF3	0.529847	0.000889666
A6	20	CBF3	0.529901	4.67472e-05
A6	21	CBF3	0.530631	-0.00011936
A6	22	CBF3	0.529318	-0.00232895
A6	23	CBF3	0.530515	-0.00202871
A6	24	CBF3	0.532016	-0.00142443
A6	25	CBF3	0.532985	-0.00135218
A6	26	CBF3	0.534748	-0.000485101
A6	27	CBF3	0.53745	0.00131974
A6	28	CBF3	0.541429	0.00440256
A6	29	CBF3	0.552549	0.0146256
A6	30	CBF3	0.572021	0.0332012
A6	31	CBF3	0.609077	0.06936
A6	32	CBF3	0.675514	0.1349
A6	33	CBF3	0.795466	0.253956
A6	34	CBF3	0.987555	0.445148
A6	35	CBF3	1.25958	0.716281
A6	36	CBF3	1.57441	1.03021
A6	37	CBF3	1.86414	1.31904
A6	38	CBF3	2.12013	1.57413
A6	39	CBF3	2.32008	1.77319
A6	40	CBF3	2.48529	1.9375
A7	1	CBF1	0.547592	-0.0165916
A7	2	CBF1	0.553611	-0.0114066
A7	3	CBF1	0.555772	-0.0100783
A7	4	CBF1	0.559043	-0.00764142
A7	5	CBF1	0.563146	-0.0043711
A7	6	CBF1	0.564554	-0.00379712
A7	7	CBF1	0.567266	-0.00191844
A7	8	CBF1	0.569189	-0.000829
A7	9	CBF1	0.57143	0.000578317
A7	10	CBF1	0.573314	0.00162914
A7	11	CBF1	0.574865	0.00234707
A7	12	CBF1	0.576547	0.00319577
A7	13	CBF1	0.577581	0.00339538
A7	14	CBF1	0.577827	0.00280802
A7	15	CBF1	0.578362	0.00251029
A7	16	CBF1	0.580694	0.00400845
A7	17	CBF1	0.580967	0.00344851
A7	18	CBF1	0.58053	0.00217797
A7	19	CBF1	0.582605	0.00341935
A7	20	CBF1	0.582468	0.0024482
A7	21	CBF1	0.582985	0.00213181
A7	22	CBF1	0.584362	0.00267575
A7	23	CBF1	0.585695	0.00317541
A7	24	CBF1	0.585546	0.0021924
A7	25	CBF1	0.586028	0.0018418
A7	26	CBF1	0.588384	0.00336433
A7	27	CBF1	0.586645	0.000791727
A7	28	CBF1	0.588766	0.00207846
A7	29	CBF1	0.588571	0.00105039
A7	30	CBF1	0.588187	-0.000167277
A7	31	CBF1	0.58978	0.000592852
A7	32	CBF1	0.588892	-0.00112842
A7	33	CBF1	0.589098	-0.00175678
A7	34	CBF1	0.589251	-0.00243646
A7	35	CBF1	0.591017	-0.00150431
A7	36	CBF1	0.590529	-0.0028254
A7	37	CBF1	0.591025	-0.00316277
A7	38	CBF1	0.590537	-0.00448445
A7	39	CBF1	0.590095	-0.00576012
A7	40	CBF1	0.592075	-0.00461375
A8	1	CBF1	0.5655	-0.00672126
A8	2	CBF1	0.566852	-0.00633078
A8	3	CBF1	0.56938	-0.00476525
A8	4	CBF1	0.570107	-0.00500079
A8	5	CBF1	0.574982	-0.00108779
A8	6	CBF1	0.576038	-0.00099384
A8	7	CBF1	0.577346	-0.000648179
A8	8	CBF1	0.57833	-0.000627005
A8	9	CBF1	0.581191	0.00127267
A8	10	CBF1	0.582427	0.00154561
A8	11	CBF1	0.58488	0.0030364
A8	12	CBF1	0.585536	0.00273076
A8	13	CBF1	0.586098	0.00233065
A8	14	CBF1	0.586789	0.00205916
A8	15	CBF1	0.588353	0.00266047
A8	16	CBF1	0.588836	0.0021818
A8	17	CBF1	0.589589	0.00197278
A8	18	CBF1	0.590948	0.00236869
A8	19	CBF1	0.591151	0.00161005
A8	20	CBF1	0.591124	0.000620093
A8	21	CBF1	0.591075	-0.000390192
A8	22	CBF1	0.592711	0.000283236
A8	23	CBF1	0.59278	-0.000610164
A8	24	CBF1	0.5929	-0.00145272
A8	25	CBF1	0.592594	-0.0027202
A8	26	CBF1	0.59512	-0.00115652
A8	27	CBF1	0.595019	-0.00222015
A8	28	CBF1	0.596435	-0.00176678
A8	29	CBF1	0.596483	-0.00268086
A8	30	CBF1	0.599855	-0.000270439
A8	31	CBF1	0.602807	0.00171852
A8	32	CBF1	0.6107	0.00864966
A8	33	CBF1	0.624482	0.0214695
A8	34	CBF1	0.651157	0.0471818
A8	35	CBF1	0.702557	0.0976198
A8	36	CBF1	0.794107	0.188208
A8	37	CBF1	0.949383	0.342522
A8	38	CBF1	1.19183	0.584006
A8	39	CBF1	1.51036	0.901573
A8	40	CBF1	1.85116	1.24142
A9	1	CBF1	0.531919	-0.00435736
A9	2	CBF1	0.533076	-0.00382868
A9	3	CBF1	0.532572	-0.00496029
A9	4	CBF1	0.534077	-0.00408238
A9	5	CBF1	0.537436	-0.00135161
A9	6	CBF1	0.537398	-0.00201645
A9	7	CBF1	0.539937	-0.000105065
A9	8	CBF1	0.542232	0.00156183
A9	9	CBF1	0.54173	0.000432781
A9	10	CBF1	0.544097	0.00217233
A9	11	CBF1	0.545196	0.0026429
A9	12	CBF1	0.545318	0.00213726
A9	13	CBF1	0.546969	0.00316113
A9	14	CBF1	0.545276	0.00084083
A9	15	CBF1	0.548838	0.00377527
A9	16	CBF1	0.547685	0.00199398
A9	17	CBF1	0.546505	0.000186869
A9	18	CBF1	0.548488	0.00154239
A9	19	CBF1	0.547574	8.76877e-07
A9	20	CBF1	0.549165	0.000963956
A9	21	CBF1	0.548853	2.39778e-05
A9	22	CBF1	0.550524	0.00106788
A9	23	CBF1	0.549456	-0.000627467
A9	24	CBF1	0.549213	-0.00149842
A9	25	CBF1	0.551011	-0.000327979
A9	26	CBF1	0.549272	-0.00269436
A9	27	CBF1	0.54964	-0.00295407
A9	28	CBF1	0.550556	-0.00266583
A9	29	CBF1	0.551851	-0.00199857
A9	30	CBF1	0.557255	0.00277825
A9	31	CBF1	0.562233	0.0071289
A9	32	CBF1	0.572957	0.017225
A9	33	CBF1	0.596911	0.0405518
A9	34	CBF1	0.639738	0.0827505
A9	35	CBF1	0.72107	0.163455
A9	36	CBF1	0.855815	0.297572
A9	37	CBF1	1.06753	0.508655
A9	38	CBF1	1.34798	0.78848
A9	39	CBF1	1.64029	1.08016
A9	40	CBF1	1.88912	1.32837
A10	1	CBF1	0.578384	-0.00759486
A10	2	CBF1	0.579166	-0.00715019
A10	3	CBF1	0.579786	-0.00686668
A10	4	CBF1	0.581534	-0.00545611
A10	5	CBF1	0.582999	-0.00432824
A10	6	CBF1	0.585437	-0.00222835
A10	7	CBF1	0.586896	-0.0011065
A10	8	CBF1	0.588142	-0.000197147
A10	9	CBF1	0.589542	0.000865392
A10	10	CBF1	0.588928	-8.55735e-05
A10	11	CBF1	0.591204	0.00185262
A10	12	CBF1	0.592349	0.00266041
A10	13	CBF1	0.591535	0.00150953
A10	14	CBF1	0.591827	0.00146366
A10	15	CBF1	0.592492	0.00179181
A10	16	CBF1	0.594382	0.00334412
A10	17	CBF1	0.593927	0.00255206
A10	18	CBF1	0.592708	0.000996224
A10	19	CBF1	0.593868	0.00181862
A10	20	CBF1	0.59444	0.00205289
A10	21	CBF1	0.59567	0.00294555
A10	22	CBF1	0.594532	0.00147025
A10	23	CBF1	0.596666	0.00326735
A10	24	CBF1	0.596516	0.00277975
A10	25	CBF1	0.595824	0.00175106
A10	26	CBF1	0.596405	0.00199428
A10	27	CBF1	0.595476	0.000728479
A10	28	CBF1	0.594621	-0.000464124
A10	29	CBF1	0.596362	0.00093983
A10	30	CBF1	0.596389	0.000629257
A10	31	CBF1	0.597154	0.0010576
A10	32	CBF1	0.59603	-0.000404056
A10	33	CBF1	0.594945	-0.00182608
A10	34	CBF1	0.595709	-0.0013994
A10	35	CBF1	0.595528	-0.00191811
A10	36	CBF1	0.595588	-0.00219489
A10	37	CBF1	0.59466	-0.00346063
A10	38	CBF1	0.595826	-0.00263204
A10	39	CBF1	0.594892	-0.00390278
A10	40	CBF1	0.596586	-0.00254615
A11	1	CBF1	0.555559	-0.00558408
A11	2	CBF1	0.555323	-0.00614741
A11	3	CBF1	0.556424	-0.00537316
A11	4	CBF1	0.557141	-0.00498378
A11	5	CBF1	0.559784	-0.00266839
A11	6	CBF1	0.559667	-0.00311257
A11	7	CBF1	0.562307	-0.000800461
A11	8	CBF1	0.564311	0.000876921
A11	9	CBF1	0.563608	-0.000154013
A11	10	CBF1	0.56557	0.00148016
A11	11	CBF1	0.565302	0.000885707
A11	12	CBF1	0.566916	0.00217155
A11	13	CBF1	0.566978	0.00190665
A11	14	CBF1	0.567583	0.00218416
A11	15	CBF1	0.566443	0.000716143
A11	16	CBF1	0.566874	0.000820141
A11	17	CBF1	0.568177	0.00179592
A11	18	CBF1	0.568125	0.00141676
A11	19	CBF1	0.568808	0.00177163
A11	20	CBF1	0.569641	0.00227713
A11	21	CBF1	0.570231	0.00254051
A11	22	CBF1	0.570805	0.00278702
A11	23	CBF1	0.570006	0.00166001
A11	24	CBF1	0.570355	0.00168205
A11	25	CBF1	0.570053	0.00105261
A11	26	CBF1	0.569875	0.00054733
A11	27	CBF1	0.569877	0.00022128
A11	28	CBF1	0.569576	-0.000407382
A11	29	CBF1	0.571623	0.00131256
A11	30	CBF1	0.570316	-0.000321397
A11	31	CBF1	0.571174	0.000209192
A11	32	CBF1	0.571178	-0.000114473
A11	33	CBF1	0.571246	-0.000373825
A11	34	CBF1	0.570439	-0.00150877
A11	35	CBF1	0.570982	-0.00129277
A11	36	CBF1	0.570689	-0.00191351
A11	37	CBF1	0.571381	-0.00154844
A11	38	CBF1	0.570835	-0.0024225
A11	39	CBF1	0.570265	-0.00331998
A11	40	CBF1	0.569329	-0.00458331
A12	1	CBF1	0.566926	-0.00775586
A12	2	CBF1	0.568495	-0.00683789
A12	3	CBF1	0.569615	-0.00636779
A12	4	CBF1	0.571036	-0.00559823
A12	5	CBF1	0.570496	-0.00678812
A12	6	CBF1	0.574687	-0.00324802
A12	7	CBF1	0.576738	-0.00184732
A12	8	CBF1	0.578412	-0.000824203
A12	9	CBF1	0.57842	-0.00146668
A12	10	CBF1	0.58236	0.00182266
A12	11	CBF1	0.581932	0.000743336
A12	12	CBF1	0.584454	0.00261516
A12	13	CBF1	0.585269	0.00277925
A12	14	CBF1	0.583603	0.000463011
A12	15	CBF1	0.587423	0.00363249
A12	16	CBF1	0.585249	0.000807524
A12	17	CBF1	0.587589	0.00249642
A12	18	CBF1	0.589186	0.0034436
A12	19	CBF1	0.589099	0.00270545
A12	20	CBF1	0.59168	0.00463557
A12	21	CBF1	0.592129	0.00443452
A12	22	CBF1	0.590193	0.00184738
A12	23	CBF1	0.591207	0.0022112
A12	24	CBF1	0.592985	0.00333815
A12	25	CBF1	0.592241	0.00194364
A12	26	CBF1	0.594329	0.00338094
A12	27	CBF1	0.593348	0.00174944
A12	28	CBF1	0.593978	0.00172834
A12	29	CBF1	0.594108	0.00120763
A12	30	CBF1	0.593857	0.00030635
A12	31	CBF1	0.596385	0.00218336
A12	32	CBF1	0.594835	-1.64116e-05
A12	33	CBF1	0.594367	-0.00113537
A12	34	CBF1	0.594485	-0.00166836
A12	35	CBF1	0.595766	-0.00103732
A12	36	CBF1	0.595388	-0.0020664
A12	37	CBF1	0.586366	-0.0117386
A12	38	CBF1	0.596238	-0.00251779
A12	39	CBF1	0.595252	-0.00415477
A12	40	CBF1	0.595326	-0.00473139
B1	1	CBF3	0.656855	0.00411664
B1	2	CBF3	0.654634	0.00118027
B1	3	CBF3	0.653641	-0.000528258
B1	4	CBF3	0.653665	-0.00121951
B1	5	CBF3	0.654286	-0.00131287
B1	6	CBF3	0.656054	-0.000260979
B1	7	CBF3	0.657758	0.000727905
B1	8	CBF3	0.658401	0.000656185
B1	9	CBF3	0.661239	0.00277833
B1	10	CBF3	0.660042	0.000866736
B1	11	CBF3	0.66134	0.00144918
B1	12	CBF3	0.659174	-0.00143183
B1	13	CBF3	0.661862	0.000540591
B1	14	CBF3	0.662297	0.000259957
B1	15	CBF3	0.663029	0.000276809
B1	16	CBF3	0.663448	-1.93828e-05
B1	17	CBF3	0.663703	-0.000479606
B1	18	CBF3	0.662703	-0.00219481
B1	19	CBF3	0.663756	-0.00185668
B1	20	CBF3	0.665051	-0.00127705
B1	21	CBF3	0.667814	0.000770537
B1	22	CBF3	0.670014	0.00225474
B1	23	CBF3	0.67672	0.00824546
B1	24	CBF3	0.690629	0.0214393
B1	25	CBF3	0.71467	0.0447656
B1	26	CBF3	0.756935	0.0863152
B1	27	CBF3	0.838078	0.166743
B1	28	CBF3	0.980309	0.308259
B1	29	CBF3	1.21192	0.539154
B1	30	CBF3	1.52277	0.849287
B1	31	CBF3	1.87942	1.20523
B1	32	CBF3	2.20104	1.52613
B1	33	CBF3	2.46186	1.78623
B1	34	CBF3	2.66531	1.98897
B1	35	CBF3	2.8351	2.15804
B1	36	CBF3	2.954	2.27623
B1	37	CBF3	3.05348	2.37499
B1	38	CBF3	3.13696	2.45776
B1	39	CBF3	3.19623	2.51631
B1	40	CBF3	3.26278	2.58214
B2	1	CBF3	0.647631	0.00128775
B2	2	CBF3	0.647964	4.00909e-05
B2	3	CBF3	0.647872	-0.00163237
B2	4	CBF3	0.650081	-0.00100415
B2	5	CBF3	0.652086	-0.00057995
B2	6	CBF3	0.652434	-0.00181205
B2	7	CBF3	0.656097	0.000269453
B2	8	CBF3	0.658268	0.000860005
B2	9	CBF3	0.66006	0.00107087
B2	10	CBF3	0.66347	0.00290073
B2	11	CBF3	0.663781	0.00163054
B2	12	CBF3	0.665439	0.00170813
B2	13	CBF3	0.665969	0.000657532
B2	14	CBF3	0.66745	0.000557325
B2	15	CBF3	0.667246	-0.00122689
B2	16	CBF3	0.670376	0.000322103
B2	17	CBF3	0.670694	-0.000940454
B2	18	CBF3	0.670867	-0.00234845
B2	19	CBF3	0.674437	-0.000358914
B2	20	CBF3	0.676014	-0.000362203
B2	21	CBF3	0.678246	0.000288728
B2	22	CBF3	0.682927	0.00338911
B2	23	CBF3	0.693285	0.0121659
B2	24	CBF3	0.708322	0.0256226
B2	25	CBF3	0.739625	0.0553442
B2	26	CBF3	0.796337	0.110476
B2	27	CBF3	0.901041	0.213599
B2	28	CBF3	1.08126	0.392239
B2	29	CBF3	1.3733	0.682697
B2	30	CBF3	1.76226	1.07008
B2	31	CBF3	2.19756	1.5038
B2	32	CBF3	2.59906	1.90371
B2	33	CBF3	2.90104	2.20411
B2	34	CBF3	3.1384	2.43989
B2	35	CBF3	3.32835	2.62826
B2	36	CBF3	3.4663	2.76463
B2	37	CBF3	3.57763	2.87438
B2	38	CBF3	3.67352	2.96869
B2	39	CBF3	3.74785	3.04144
B2	40	CBF3	3.80413	3.09614
B3	1	CBF3	0.657088	-0.00181617
B3	2	CBF3	0.659641	-0.000918998
B3	3	CBF3	0.659662	-0.00255347
B3	4	CBF3	0.661163	-0.00270761
B3	5	CBF3	0.664201	-0.00132543
B3	6	CBF3	0.667527	0.000344991
B3	7	CBF3	0.669503	0.000665012
B3	8	CBF3	0.670903	0.00040949
B3	9	CBF3	0.674116	0.00196756
B3	10	CBF3	0.675807	0.00200225
B3	11	CBF3	0.67736	0.00190021
B3	12	CBF3	0.679314	0.00219883
B3	13	CBF3	0.680493	0.0017223
B3	14	CBF3	0.681158	0.000731554
B3	15	CBF3	0.682921	0.000839024
B3	16	CBF3	0.684348	0.000610622
B3	17	CBF3	0.684156	-0.00123783
B3	18	CBF3	0.684339	-0.00270983
B3	19	CBF3	0.687313	-0.00139107
B3	20	CBF3	0.689426	-0.000934377
B3	21	CBF3	0.690257	-0.00175817
B3	22	CBF3	0.694897	0.00122594
B3	23	CBF3	0.702542	0.00721508
B3	24	CBF3	0.715648	0.0186657
B3	25	CBF3	0.738883	0.0402446
B3	26	CBF3	0.787081	0.0867878
B3	27	CBF3	0.870992	0.169043
B3	28	CBF3	1.01201	0.308405
B3	29	CBF3	1.23846	0.533198
B3	30	CBF3	1.54348	0.83656
B3	31	CBF3	1.87806	1.16949
B3	32	CBF3	2.17357	1.46334
B3	33	CBF3	2.40783	1.69594
B3	34	CBF3	2.59493	1.88139
B3	35	CBF3	2.75073	2.03554
B3	36	CBF3	2.85726	2.14042
B3	37	CBF3	2.95166	2.23316
B3	38	CBF3	3.02407	2.30391
B3	39	CBF3	3.08816	2.36634
B3	40	CBF3	3.13296	2.40949
B4	1	CBF3	0.606325	0.00332559
B4	2	CBF3	0.603381	-0.000425521
B4	3	CBF3	0.603233	-0.00138099
B4	4	CBF3	0.604655	-0.000766539
B4	5	CBF3	0.606191	-3.73463e-05
B4	6	CBF3	0.60626	-0.0007755
B4	7	CBF3	0.606459	-0.00138407
B4	8	CBF3	0.60825	-0.000400428
B4	9	CBF3	0.611289	0.00183122
B4	10	CBF3	0.611368	0.00110362
B4	11	CBF3	0.611722	0.000650252
B4	12	CBF3	0.612229	0.000349358
B4	13	CBF3	0.61316	0.000473206
B4	14	CBF3	0.615773	0.00227928
B4	15	CBF3	0.616443	0.00214212
B4	16	CBF3	0.614867	-0.000240947
B4	17	CBF3	0.616079	0.000163162
B4	18	CBF3	0.617081	0.000358775
B4	19	CBF3	0.616121	-0.00140863
B4	20	CBF3	0.618064	-0.000273174
B4	21	CBF3	0.617729	-0.00141509
B4	22	CBF3	0.618829	-0.00112238
B4	23	CBF3	0.620548	-0.000210739
B4	24	CBF3	0.621195	-0.000370906
B4	25	CBF3	0.622809	0.000435773
B4	26	CBF3	0.629494	0.00631296
B4	27	CBF3	0.639871	0.0158832
B4	28	CBF3	0.661554	0.0367593
B4	29	CBF3	0.70233	0.0767274
B4	30	CBF3	0.77489	0.148481
B4	31	CBF3	0.906951	0.279734
B4	32	CBF3	1.12415	0.496127
B4	33	CBF3	1.43444	0.805604
B4	34	CBF3	1.79951	1.16987
B4	35	CBF3	2.17457	1.54413
B4	36	CBF3	2.48193	1.85067
B4	37	CBF3	2.73382	2.10176
B4	38	CBF3	2.93677	2.3039
B4	39	CBF3	3.09041	2.45673
B4	40	CBF3	3.22337	2.58889
B5	1	CBF3	0.59917	-0.00288258
B5	2	CBF3	0.601466	-0.00186583
B5	3	CBF3	0.603645	-0.000964956
B5	4	CBF3	0.603096	-0.00279248
B5	5	CBF3	0.606039	-0.00112825
B5	6	CBF3	0.608042	-0.000404099
B5	7	CBF3	0.610293	0.000567648
B5	8	CBF3	0.611467	0.000462696
B5	9	CBF3	0.613718	0.00143552
B5	10	CBF3	0.614847	0.00128556
B5	11	CBF3	0.616153	0.0013127
B5	12	CBF3	0.618016	0.00189755
B5	13	CBF3	0.618578	0.00118081
B5	14	CBF3	0.621338	0.00266153
B5	15	CBF3	0.621634	0.00167866
B5	16	CBF3	0.621784	0.000550473
B5	17	CBF3	0.622729	0.000216342
B5	18	CBF3	0.623386	-0.000405561
B5	19	CBF3	0.624277	-0.000793455
B5	20	CBF3	0.625122	-0.00122689
B5	21	CBF3	0.624805	-0.00282249
B5	22	CBF3	0.626208	-0.00269808
B5	23	CBF3	0.627135	-0.00305034
B5	24	CBF3	0.627161	-0.00430262
B5	25	CBF3	0.630727	-0.00201581
B5	26	CBF3	0.636069	0.00204757
B5	27	CBF3	0.642608	0.00730799
B5	28	CBF3	0.652183	0.0156043
B5	29	CBF3	0.676743	0.0388855
B5	30	CBF3	0.72208	0.0829436
B5	31	CBF3	0.804731	0.164316
B5	32	CBF3	0.950384	0.30869
B5	33	CBF3	1.19091	0.54794
B5	34	CBF3	1.53202	0.887766
B5	35	CBF3	1.941	1.29547
B5	36	CBF3	2.34807	1.70126
B5	37	CBF3	2.67247	2.02438
B5	38	CBF3	2.93609	2.28672
B5	39	CBF3	3.14775	2.4971
B5	40	CBF3	3.30619	2.65427
B6	1	CBF3	0.585389	-0.00254637
B6	2	CBF3	0.585793	-0.00300629
B6	3	CBF3	0.586079	-0.00358293
B6	4	CBF3	0.589091	-0.00143521
B6	5	CBF3	0.589897	-0.00149191
B6	6	CBF3	0.591623	-0.000629685
B6	7	CBF3	0.594247	0.00113019
B6	8	CBF3	0.595351	0.00137133
B6	9	CBF3	0.594742	-0.000101577
B6	10	CBF3	0.596874	0.00116673
B6	11	CBF3	0.598251	0.00168105
B6	12	CBF3	0.599912	0.00247782
B6	13	CBF3	0.599171	0.000873727
B6	14	CBF3	0.60047	0.00130912
B6	15	CBF3	0.601361	0.00133617
B6	16	CBF3	0.601209	0.000320844
B6	17	CBF3	0.602001	0.000249064
B6	18	CBF3	0.602807	0.000192483
B6	19	CBF3	0.603487	8.82419e-06
B6	20	CBF3	0.604281	-6.08701e-05
B6	21	CBF3	0.604876	-0.000329584
B6	22	CBF3	0.604869	-0.00119971
B6	23	CBF3	0.6058	-0.00113273
B6	24	CBF3	0.606476	-0.00131973
B6	25	CBF3	0.607594	-0.00106571
B6	26	CBF3	0.609755	0.000232286
B6	27	CBF3	0.615529	0.00514202
B6	28	CBF3	0.626419	0.0151689
B6	29	CBF3	0.646812	0.0346988
B6	30	CBF3	0.686245	0.0732675
B6	31	CBF3	0.758922	0.145082
B6	32	CBF3	0.890365	0.275661
B6	33	CBF3	1.1053	0.48973
B6	34	CBF3	1.41665	0.800219
B6	35	CBF3	1.80254	1.18524
B6	36	CBF3	2.18814	1.56999
B6	37	CBF3	2.49591	1.87689
B6	38	CBF3	2.74877	2.12889
B6	39	CBF3	2.94788	2.32713
B6	40	CBF3	3.10761	2.486
B7	1	CBF1	0.565595	-0.0113231
B7	2	CBF1	0.571506	-0.00660743
B7	3	CBF1	0.57361	-0.00569825
B7	4	CBF1	0.575763	-0.00474073
B7	5	CBF1	0.579215	-0.00248448
B7	6	CBF1	0.58179	-0.00110437
B7	7	CBF1	0.584222	0.000132638
B7	8	CBF1	0.58508	-0.000204337
B7	9	CBF1	0.588409	0.0019293
B7	10	CBF1	0.589445	0.00176971
B7	11	CBF1	0.592341	0.00347044
B7	12	CBF1	0.592737	0.00267105
B7	13	CBF1	0.592784	0.00152321
B7	14	CBF1	0.596624	0.00416796
B7	15	CBF1	0.595886	0.00223472
B7	16	CBF1	0.595968	0.00112133
B7	17	CBF1	0.597969	0.00192698
B7	18	CBF1	0.598721	0.00148438
B7	19	CBF1	0.598464	3.15495e-05
B7	20	CBF1	0.601704	0.00207679
B7	21	CBF1	0.601384	0.000561316
B7	22	CBF1	0.60101	-0.00100733
B7	23	CBF1	0.602543	-0.000670414
B7	24	CBF1	0.60511	0.000702072
B7	25	CBF1	0.604894	-0.000709157
B7	26	CBF1	0.605254	-0.00154514
B7	27	CBF1	0.605659	-0.00233452
B7	28	CBF1	0.606943	-0.00224633
B7	29	CBF1	0.60796	-0.00242476
B7	30	CBF1	0.609547	-0.00203241
B7	31	CBF1	0.614174	0.00139876
B7	32	CBF1	0.621673	0.00770264
B7	33	CBF1	0.635557	0.0203917
B7	34	CBF1	0.662051	0.0456908
B7	35	CBF1	0.712355	0.0947991
B7	36	CBF1	0.802309	0.183558
B7	37	CBF1	0.959098	0.339152
B7	38	CBF1	1.20556	0.584421
B7	39	CBF1	1.53439	0.91205
B7	40	CBF1	1.89854	1.27501
B8	1	CBF1	0.578089	-0.00760654
B8	2	CBF1	0.582554	-0.0041531
B8	3	CBF1	0.583913	-0.0038062
B8	4	CBF1	0.585702	-0.00302948
B8	5	CBF1	0.587851	-0.00189246
B8	6	CBF1	0.590063	-0.000692315
B8	7	CBF1	0.591643	-0.000124575
B8	8	CBF1	0.592953	0.000173752
B8	9	CBF1	0.59557	0.00177903
B8	10	CBF1	0.597214	0.00241114
B8	11	CBF1	0.597981	0.00216594
B8	12	CBF1	0.598179	0.0013518
B8	13	CBF1	0.59964	0.00180093
B8	14	CBF1	0.601636	0.00278423
B8	15	CBF1	0.60151	0.00164674
B8	16	CBF1	0.600805	-7.06999e-05
B8	17	CBF1	0.603011	0.00112396
B8	18	CBF1	0.60464	0.00174022
B8	19	CBF1	0.605451	0.00153966
B8	20	CBF1	0.60463	-0.000293062
B8	21	CBF1	0.604698	-0.00123731
B8	22	CBF1	0.606629	-0.000318263
B8	23	CBF1	0.605585	-0.00237503
B8	24	CBF1	0.607706	-0.00126513
B8	25	CBF1	0.60901	-0.000973897
B8	26	CBF1	0.608903	-0.00209279
B8	27	CBF1	0.610848	-0.00115967
B8	28	CBF1	0.611885	-0.00113451
B8	29	CBF1	0.61598	0.00194801
B8	30	CBF1	0.620056	0.0050127
B8	31	CBF1	0.631731	0.0156752
B8	32	CBF1	0.653639	0.0365712
B8	33	CBF1	0.691731	0.0736516
B8	34	CBF1	0.76456	0.145468
B8	35	CBF1	0.891399	0.271295
B8	36	CBF1	1.0998	0.478687
B8	37	CBF1	1.39639	0.774264
B8	38	CBF1	1.74694	1.1238
B8	39	CBF1	2.08654	1.46239
B8	40	CBF1	2.34916	1.724
B9	1	CBF1	0.577931	-0.00322902
B9	2	CBF1	0.579487	-0.00276036
B9	3	CBF1	0.580681	-0.00265261
B9	4	CBF1	0.582356	-0.00206462
B9	5	CBF1	0.583801	-0.00170593
B9	6	CBF1	0.58509	-0.00150322
B9	7	CBF1	0.587915	0.000235138
B9	8	CBF1	0.588863	9.63679e-05
B9	9	CBF1	0.591155	0.00130144
B9	10	CBF1	0.592783	0.00184348
B9	11	CBF1	0.592876	0.000849561
B9	12	CBF1	0.594877	0.00176347
B9	13	CBF1	0.59559	0.00139004
B9	14	CBF1	0.596146	0.000859544
B9	15	CBF1	0.59746	0.00108681
B9	16	CBF1	0.598334	0.000874901
B9	17	CBF1	0.599507	0.000960543
B9	18	CBF1	0.600983	0.00135011
B9	19	CBF1	0.601398	0.000678354
B9	20	CBF1	0.603293	0.001487
B9	21	CBF1	0.603722	0.00082967
B9	22	CBF1	0.604394	0.00041493
B9	23	CBF1	0.603637	-0.00142847
B9	24	CBF1	0.603923	-0.00222903
B9	25	CBF1	0.605698	-0.00154121
B9	26	CBF1	0.607	-0.00132598
B9	27	CBF1	0.606936	-0.00247565
B9	28	CBF1	0.610077	-0.00042204
B9	29	CBF1	0.612913	0.00132741
B9	30	CBF1	0.618597	0.00592524
B9	31	CBF1	0.632026	0.0182671
B9	32	CBF1	0.65343	0.0385846
B9	33	CBF1	0.696567	0.0806356
B9	34	CBF1	0.775063	0.158045
B9	35	CBF1	0.914078	0.295973
B9	36	CBF1	1.13827	0.519081
B9	37	CBF1	1.4637	0.843422
B9	38	CBF1	1.85302	1.23165
B9	39	CBF1	2.2242	1.60175
B9	40	CBF1	2.53038	1.90684
B10	1	CBF1	0.522812	-0.00849531
B10	2	CBF1	0.524729	-0.00604945
B10	3	CBF1	0.524416	-0.00583351
B10	4	CBF1	0.524101	-0.00561984
B10	5	CBF1	0.526147	-0.00304559
B10	6	CBF1	0.525972	-0.00269101
B10	7	CBF1	0.526507	-0.00162714
B10	8	CBF1	0.525017	-0.00258857
B10	9	CBF1	0.527351	0.000273573
B10	10	CBF1	0.525953	-0.000594819
B10	11	CBF1	0.527066	0.00104615
B10	12	CBF1	0.527423	0.00193222
B10	13	CBF1	0.52682	0.00185806
B10	14	CBF1	0.526512	0.00207924
B10	15	CBF1	0.526432	0.00252793
B10	16	CBF1	0.525459	0.00208357
B10	17	CBF1	0.525758	0.00291099
B10	18	CBF1	0.524478	0.0021602
B10	19	CBF1	0.523409	0.00161957
B10	20	CBF1	0.523776	0.00251589
B10	21	CBF1	0.52362	0.00288847
B10	22	CBF1	0.522372	0.00216891
B10	23	CBF1	0.522689	0.00301469
B10	24	CBF1	0.521372	0.00222712
B10	25	CBF1	0.521419	0.00280266
B10	26	CBF1	0.520337	0.00224981
B10	27	CBF1	0.518872	0.00131305
B10	28	CBF1	0.518849	0.00181891
B10	29	CBF1	0.517476	0.000974953
B10	30	CBF1	0.517302	0.00133019
B10	31	CBF1	0.516338	0.000894643
B10	32	CBF1	0.514577	-0.000337933
B10	33	CBF1	0.513401	-0.000985191
B10	34	CBF1	0.512685	-0.00117212
B10	35	CBF1	0.511565	-0.00176288
B10	36	CBF1	0.509809	-0.0029905
B10	37	CBF1	0.507839	-0.00443128
B10	38	CBF1	0.507598	-0.00414411
B10	39	CBF1	0.506347	-0.0048663
B10	40	CBF1	0.504094	-0.00658989
B11	1	CBF1	0.541419	-0.00210192
B11	2	CBF1	0.540553	-0.00335774
B11	3	CBF1	0.540661	-0.00363997
B11	4	CBF1	0.542142	-0.00254916
B11	5	CBF1	0.543625	-0.00145584
B11	6	CBF1	0.543873	-0.00159854
B11	7	CBF1	0.544343	-0.0015185
B11	8	CBF1	0.544388	-0.00186315
B11	9	CBF1	0.54688	0.00023934
B11	10	CBF1	0.547246	0.000215012
B11	11	CBF1	0.546507	-0.000914445
B11	12	CBF1	0.548068	0.000256538
B11	13	CBF1	0.550134	0.00193321
B11	14	CBF1	0.550655	0.00206361
B11	15	CBF1	0.550906	0.00192538
B11	16	CBF1	0.550825	0.00145414
B11	17	CBF1	0.551925	0.00216378
B11	18	CBF1	0.552395	0.00224358
B11	19	CBF1	0.552072	0.00153118
B11	20	CBF1	0.552113	0.0011823
B11	21	CBF1	0.551986	0.000664986
B11	22	CBF1	0.553627	0.00191584
B11	23	CBF1	0.553411	0.00130953
B11	24	CBF1	0.554435	0.00194354
B11	25	CBF1	0.553178	0.000297189
B11	26	CBF1	0.554037	0.000765911
B11	27	CBF1	0.555199	0.00153772
B11	28	CBF1	0.554884	0.000832412
B11	29	CBF1	0.554488	4.67538e-05
B11	30	CBF1	0.555122	0.000290885
B11	31	CBF1	0.554415	-0.000806088
B11	32	CBF1	0.554218	-0.00139314
B11	33	CBF1	0.556197	0.00019555
B11	34	CBF1	0.555524	-0.000866852
B11	35	CBF1	0.555209	-0.00157204
B11	36	CBF1	0.55535	-0.00182144
B11	37	CBF1	0.556814	-0.000747551
B11	38	CBF1	0.555912	-0.00203949
B11	39	CBF1	0.556119	-0.00222219
B11	40	CBF1	0.556238	-0.0024934
B12	1	CBF1	0.556995	-0.00661905
B12	2	CBF1	0.557094	-0.00705277
B12	3	CBF1	0.558204	-0.00647613
B12	4	CBF1	0.561782	-0.00343042
B12	5	CBF1	0.561974	-0.00377193
B12	6	CBF1	0.563067	-0.0032112
B12	7	CBF1	0.565628	-0.00118348
B12	8	CBF1	0.567298	-4.63188e-05
B12	9	CBF1	0.567789	-8.81342e-05
B12	10	CBF1	0.569795	0.00138532
B12	11	CBF1	0.569306	0.000363664
B12	12	CBF1	0.571621	0.00214504
B12	13	CBF1	0.572328	0.00231958
B12	14	CBF1	0.571891	0.0013499
B12	15	CBF1	0.57357	0.00249589
B12	16	CBF1	0.573101	0.00149456
B12	17	CBF1	0.574631	0.00249094
B12	18	CBF1	0.575234	0.00256118
B12	19	CBF1	0.57539	0.00218415
B12	20	CBF1	0.574872	0.00113424
B12	21	CBF1	0.576146	0.00187509
B12	22	CBF1	0.577501	0.00269689
B12	23	CBF1	0.577951	0.00261442
B12	24	CBF1	0.577599	0.0017298
B12	25	CBF1	0.578242	0.00184003
B12	26	CBF1	0.577667	0.000731414
B12	27	CBF1	0.578017	0.000548395
B12	28	CBF1	0.578615	0.000614047
B12	29	CBF1	0.577631	-0.000902924
B12	30	CBF1	0.578963	-0.000104075
B12	31	CBF1	0.58112	0.00152077
B12	32	CBF1	0.578565	-0.00156726
B12	33	CBF1	0.580404	-0.000260993
B12	34	CBF1	0.579827	-0.00137068
B12	35	CBF1	0.579968	-0.00176298
B12	36	CBF1	0.580462	-0.00180211
B12	37	CBF1	0.580832	-0.0019645
B12	38	CBF1	0.579873	-0.00345614
B12	39	CBF1	0.581166	-0.00269604
B12	40	CBF1	0.580625	-0.00377009
C1	1	CBF3	0.692182	0.00251397
C1	2	CBF3	0.690984	0.000275311
C1	3	CBF3	0.691078	-0.000671655
C1	4	CBF3	0.690911	-0.00187963
C1	5	CBF3	0.693105	-0.000726189
C1	6	CBF3	0.694316	-0.000555926
C1	7	CBF3	0.696669	0.000756779
C1	8	CBF3	0.696958	4.24238e-06
C1	9	CBF3	0.699969	0.00197528
C1	10	CBF3	0.699685	0.000649586
C1	11	CBF3	0.701327	0.00125115
C1	12	CBF3	0.701658	0.000541885
C1	13	CBF3	0.703622	0.00146436
C1	14	CBF3	0.703971	0.0007725
C1	15	CBF3	0.70493	0.000690814
C1	16	CBF3	0.704615	-0.000664385
C1	17	CBF3	0.706269	-5.10214e-05
C1	18	CBF3	0.706862	-0.000499216
C1	19	CBF3	0.705951	-0.00245082
C1	20	CBF3	0.707215	-0.00222745
C1	21	CBF3	0.710188	-0.000295511
C1	22	CBF3	0.711354	-0.000169952
C1	23	CBF3	0.71465	0.00208516
C1	24	CBF3	0.719823	0.00621752
C1	25	CBF3	0.73109	0.016443
C1	26	CBF3	0.753244	0.0375566
C1	27	CBF3	0.792058	0.0753293
C1	28	CBF3	0.86658	0.148811
C1	29	CBF3	0.996783	0.277973
C1	30	CBF3	1.20564	0.485788
C1	31	CBF3	1.51133	0.790438
C1	32	CBF3	1.87772	1.15579
C1	33	CBF3	2.24211	1.51913
C1	34	CBF3	2.54	1.81599
C1	35	CBF3	2.79257	2.06752
C1	36	CBF3	3.00275	2.27665
C1	37	CBF3	3.15958	2.43244
C1	38	CBF3	3.2925	2.56432
C1	39	CBF3	3.39372	2.6645
C1	40	CBF3	3.48424	2.75398
C2	1	CBF3	0.664353	-0.00051172
C2	2	CBF3	0.664409	-0.00191207
C2	3	CBF3	0.665123	-0.0026542
C2	4	CBF3	0.666772	-0.00246138
C2	5	CBF3	0.670638	-5.14428e-05
C2	6	CBF3	0.671522	-0.000623764
C2	7	CBF3	0.672833	-0.000768899
C2	8	CBF3	0.67586	0.000802163
C2	9	CBF3	0.679073	0.00255889
C2	10	CBF3	0.680651	0.00268091
C2	11	CBF3	0.680752	0.00132532
C2	12	CBF3	0.68375	0.00286718
C2	13	CBF3	0.683119	0.000780599
C2	14	CBF3	0.683895	9.98574e-05
C2	15	CBF3	0.685684	0.00043299
C2	16	CBF3	0.687543	0.000835324
C2	17	CBF3	0.688311	0.000147847
C2	18	CBF3	0.687789	-0.00183007
C2	19	CBF3	0.689139	-0.00193616
C2	20	CBF3	0.691193	-0.00133886
C2	21	CBF3	0.692005	-0.00198307
C2	22	CBF3	0.69495	-0.000494141
C2	23	CBF3	0.698511	0.00161092
C2	24	CBF3	0.706084	0.00772773
C2	25	CBF3	0.716091	0.0162787
C2	26	CBF3	0.738479	0.0372103
C2	27	CBF3	0.776239	0.0735142
C2	28	CBF3	0.849095	0.144914
C2	29	CBF3	0.98312	0.277483
C2	30	CBF3	1.19858	0.491491
C2	31	CBF3	1.51698	0.808433
C2	32	CBF3	1.90704	1.19703
C2	33	CBF3	2.30751	1.59605
C2	34	CBF3	2.63921	1.92629
C2	35	CBF3	2.92251	2.20814
C2	36	CBF3	3.14322	2.42739
C2	37	CBF3	3.31949	2.60221
C2	38	CBF3	3.45792	2.73917
C2	39	CBF3	3.56752	2.84732
C2	40	CBF3	3.65561	2.93396
C3	1	CBF3	0.624718	0.00136433
C3	2	CBF3	0.624741	0.000176068
C3	3	CBF3	0.624637	-0.00113832
C3	4	CBF3	0.626383	-0.000603764
C3	5	CBF3	0.628285	8.80258e-05
C3	6	CBF3	0.629009	-0.000399343
C3	7	CBF3	0.629474	-0.00114528
C3	8	CBF3	0.633169	0.00133853
C3	9	CBF3	0.63496	0.00191874
C3	10	CBF3	0.63575	0.00149854
C3	11	CBF3	0.636206	0.000743189
C3	12	CBF3	0.636275	-0.000398401
C3	13	CBF3	0.638985	0.0010999
C3	14	CBF3	0.639651	0.000555369
C3	15	CBF3	0.640525	0.000218322
C3	16	CBF3	0.640889	-0.000628821
C3	17	CBF3	0.64135	-0.00137869
C3	18	CBF3	0.642252	-0.00168701
C3	19	CBF3	0.643947	-0.00120276
C3	20	CBF3	0.6446	-0.00176124
C3	21	CBF3	0.647728	0.000156024
C3	22	CBF3	0.64874	-4.26799e-05
C3	23	CBF3	0.652763	0.00276966
C3	24	CBF3	0.660104	0.00889918
C3	25	CBF3	0.67173	0.019314
C3	26	CBF3	0.695536	0.0419098
C3	27	CBF3	0.73957	0.084733
C3	28	CBF3	0.821772	0.165723
C3	29	CBF3	0.96368	0.306421
C3	30	CBF3	1.19124	0.532769
C3	31	CBF3	1.51306	0.853378
C3	32	CBF3	1.88551	1.22462
C3	33	CBF3	2.25063	1.58853
C3	34	CBF3	2.55279	1.88947
C3	35	CBF3	2.80271	2.13819
C3	36	CBF3	3.00313	2.33739
C3	37	CBF3	3.15881	2.49186
C3	38	CBF3	3.28402	2.61587
C3	39	CBF3	3.38903	2.71966
C3	40	CBF3	3.48405	2.81347
C4	1	CBF3	0.60949	0.00425955
C4	2	CBF3	0.605456	-0.000211061
C4	3	CBF3	0.604336	-0.00176826
C4	4	CBF3	0.604831	-0.00171011
C4	5	CBF3	0.607009	3.12769e-05
C4	6	CBF3	0.606714	-0.000700514
C4	7	CBF3	0.607629	-0.000221555
C4	8	CBF3	0.607548	-0.000739842
C4	9	CBF3	0.609993	0.00126845
C4	10	CBF3	0.611156	0.00199489
C4	11	CBF3	0.609333	-0.00026451
C4	12	CBF3	0.610887	0.000852517
C4	13	CBF3	0.610894	0.000422981
C4	14	CBF3	0.612002	0.00109387
C4	15	CBF3	0.613136	0.00179056
C4	16	CBF3	0.614267	0.0024857
C4	17	CBF3	0.613549	0.00133096
C4	18	CBF3	0.612921	0.000265323
C4	19	CBF3	0.612465	-0.000626983
C4	20	CBF3	0.614116	0.000587318
C4	21	CBF3	0.613662	-0.000303081
C4	22	CBF3	0.613453	-0.000949399
C4	23	CBF3	0.614557	-0.000281911
C4	24	CBF3	0.613496	-0.0017792
C4	25	CBF3	0.613385	-0.00232759
C4	26	CBF3	0.614582	-0.00156712
C4	27	CBF3	0.613145	-0.00344094
C4	28	CBF3	0.615695	-0.0013278
C4	29	CBF3	0.618256	0.000796428
C4	30	CBF3	0.622985	0.00508853
C4	31	CBF3	0.631479	0.0131459
C4	32	CBF3	0.648113	0.0293436
C4	33	CBF3	0.682326	0.0631192
C4	34	CBF3	0.742923	0.123279
C4	35	CBF3	0.853385	0.233305
C4	36	CBF3	1.03364	0.413121
C4	37	CBF3	1.29322	0.672264
C4	38	CBF3	1.61017	0.988775
C4	39	CBF3	1.92347	1.30165
C4	40	CBF3	2.19748	1.57522
C5	1	CBF3	0.616454	-0.00561953
C5	2	CBF3	0.618522	-0.00455488
C5	3	CBF3	0.619999	-0.00408145
C5	4	CBF3	0.621232	-0.00385168
C5	5	CBF3	0.623728	-0.00235961
C5	6	CBF3	0.62593	-0.00116139
C5	7	CBF3	0.628761	0.00066632
C5	8	CBF3	0.630592	0.00149398
C5	9	CBF3	0.631175	0.00107299
C5	10	CBF3	0.633084	0.00197867
C5	11	CBF3	0.634828	0.00271949
C5	12	CBF3	0.634474	0.00136204
C5	13	CBF3	0.637058	0.00294269
C5	14	CBF3	0.637133	0.00201434
C5	15	CBF3	0.637822	0.00169979
C5	16	CBF3	0.637812	0.000685969
C5	17	CBF3	0.638988	0.000858337
C5	18	CBF3	0.640727	0.00159409
C5	19	CBF3	0.640542	0.000405622
C5	20	CBF3	0.640479	-0.000660833
C5	21	CBF3	0.642999	0.0008555
C5	22	CBF3	0.643547	0.000399575
C5	23	CBF3	0.643879	-0.000271999
C5	24	CBF3	0.642608	-0.00254587
C5	25	CBF3	0.642375	-0.00378273
C5	26	CBF3	0.64523	-0.00193094
C5	27	CBF3	0.646515	-0.00164962
C5	28	CBF3	0.650715	0.00154673
C5	29	CBF3	0.65769	0.0075181
C5	30	CBF3	0.671105	0.0199297
C5	31	CBF3	0.696536	0.0443576
C5	32	CBF3	0.745328	0.0921455
C5	33	CBF3	0.833622	0.179436
C5	34	CBF3	0.984892	0.329703
C5	35	CBF3	1.22755	0.57136
C5	36	CBF3	1.55135	0.894152
C5	37	CBF3	1.91036	1.25216
C5	38	CBF3	2.25136	1.59215
C5	39	CBF3	2.53242	1.87221
C5	40	CBF3	2.74553	2.08432
C6	1	CBF3	0.584347	-0.00495341
C6	2	CBF3	0.585902	-0.00394624
C6	3	CBF3	0.585893	-0.00450232
C6	4	CBF3	0.586767	-0.00417477
C6	5	CBF3	0.589783	-0.00170645
C6	6	CBF3	0.590899	-0.00113809
C6	7	CBF3	0.591871	-0.000713084
C6	8	CBF3	0.593333	0.000202173
C6	9	CBF3	0.59426	0.000581346
C6	10	CBF3	0.59523	0.00100451
C6	11	CBF3	0.596236	0.00146307
C6	12	CBF3	0.596788	0.00146817
C6	13	CBF3	0.597742	0.00187518
C6	14	CBF3	0.597435	0.00102065
C6	15	CBF3	0.60061	0.00364835
C6	16	CBF3	0.599751	0.00224201
C6	17	CBF3	0.600152	0.0020966
C6	18	CBF3	0.60049	0.00188694
C6	19	CBF3	0.599669	0.000518978
C6	20	CBF3	0.601155	0.0014579
C6	21	CBF3	0.601553	0.00130796
C6	22	CBF3	0.601864	0.00107195
C6	23	CBF3	0.602657	0.00131809
C6	24	CBF3	0.602368	0.000482162
C6	25	CBF3	0.601705	-0.00072844
C6	26	CBF3	0.601907	-0.00107418
C6	27	CBF3	0.602515	-0.00101324
C6	28	CBF3	0.602415	-0.00165998
C6	29	CBF3	0.602784	-0.00183864
C6	30	CBF3	0.603582	-0.00158732
C6	31	CBF3	0.60427	-0.00144633
C6	32	CBF3	0.604652	-0.00161194
C6	33	CBF3	0.605009	-0.00180188
C6	34	CBF3	0.608709	0.00135064
C6	35	CBF3	0.613622	0.00571665
C6	36	CBF3	0.623673	0.01522
C6	37	CBF3	0.645137	0.0361375
C6	38	CBF3	0.68293	0.0733832
C6	39	CBF3	0.756341	0.146247
C6	40	CBF3	0.881885	0.271244
C7	1	CBF1	0.511413	-0.0108829
C7	2	CBF1	0.516769	-0.00638728
C7	3	CBF1	0.519075	-0.00494088
C7	4	CBF1	0.521298	-0.00357893
C7	5	CBF1	0.523707	-0.00203
C7	6	CBF1	0.525312	-0.0012855
C7	7	CBF1	0.527274	-0.000184385
C7	8	CBF1	0.527269	-0.00104945
C7	9	CBF1	0.530388	0.00120907
C7	10	CBF1	0.532805	0.00276593
C7	11	CBF1	0.533716	0.00281621
C7	12	CBF1	0.533888	0.00212824
C7	13	CBF1	0.535774	0.00315318
C7	14	CBF1	0.535831	0.00234993
C7	15	CBF1	0.536664	0.00232279
C7	16	CBF1	0.536562	0.00136003
C7	17	CBF1	0.537025	0.000963223
C7	18	CBF1	0.537802	0.000879161
C7	19	CBF1	0.540781	0.00299797
C7	20	CBF1	0.539667	0.00102366
C7	21	CBF1	0.540444	0.000940554
C7	22	CBF1	0.540323	-4.14524e-05
C7	23	CBF1	0.540411	-0.000813948
C7	24	CBF1	0.541783	-0.000301786
C7	25	CBF1	0.540576	-0.00236919
C7	26	CBF1	0.541459	-0.00234722
C7	27	CBF1	0.539415	-0.00525106
C7	28	CBF1	0.542464	-0.00306281
C7	29	CBF1	0.544188	-0.00219862
C7	30	CBF1	0.54797	0.000722699
C7	31	CBF1	0.55193	0.0038226
C7	32	CBF1	0.561453	0.0124847
C7	33	CBF1	0.576375	0.0265466
C7	34	CBF1	0.609261	0.058572
C7	35	CBF1	0.667142	0.115592
C7	36	CBF1	0.767183	0.214773
C7	37	CBF1	0.922738	0.369467
C7	38	CBF1	1.12957	0.575436
C7	39	CBF1	1.36015	0.805154
C7	40	CBF1	1.57063	1.01478
C8	1	CBF1	0.504591	-0.00649798
C8	2	CBF1	0.507593	-0.00451415
C8	3	CBF1	0.509824	-0.00330291
C8	4	CBF1	0.511538	-0.00260815
C8	5	CBF1	0.513182	-0.0019823
C8	6	CBF1	0.514965	-0.00121869
C8	7	CBF1	0.516588	-0.000615306
C8	8	CBF1	0.51729	-0.000931858
C8	9	CBF1	0.519824	0.000582764
C8	10	CBF1	0.52152	0.0012597
C8	11	CBF1	0.523843	0.00256398
C8	12	CBF1	0.524991	0.00269297
C8	13	CBF1	0.525602	0.00228445
C8	14	CBF1	0.526365	0.00202905
C8	15	CBF1	0.526609	0.0012539
C8	16	CBF1	0.528551	0.00217683
C8	17	CBF1	0.528103	0.000709433
C8	18	CBF1	0.529167	0.00075492
C8	19	CBF1	0.529521	8.95618e-05
C8	20	CBF1	0.531372	0.000921532
C8	21	CBF1	0.531205	-0.000264175
C8	22	CBF1	0.533414	0.000924887
C8	23	CBF1	0.534072	0.000564288
C8	24	CBF1	0.534548	2.15362e-05
C8	25	CBF1	0.534581	-0.000964733
C8	26	CBF1	0.535066	-0.00149878
C8	27	CBF1	0.534971	-0.00261255
C8	28	CBF1	0.538206	-0.000397093
C8	29	CBF1	0.537906	-0.00171643
C8	30	CBF1	0.538752	-0.00188904
C8	31	CBF1	0.542832	0.0011722
C8	32	CBF1	0.548762	0.00608316
C8	33	CBF1	0.558938	0.0152395
C8	34	CBF1	0.580328	0.0356105
C8	35	CBF1	0.617448	0.0717119
C8	36	CBF1	0.684959	0.138204
C8	37	CBF1	0.803342	0.255567
C8	38	CBF1	0.983034	0.43424
C8	39	CBF1	1.22533	0.675522
C8	40	CBF1	1.48343	0.932603
C9	1	CBF1	0.540681	-0.00518462
C9	2	CBF1	0.542776	-0.00427383
C9	3	CBF1	0.544812	-0.00342194
C9	4	CBF1	0.547677	-0.0017413
C9	5	CBF1	0.550253	-0.000349798
C9	6	CBF1	0.551354	-0.000432323
C9	7	CBF1	0.552702	-0.000268502
C9	8	CBF1	0.554608	0.000452921
C9	9	CBF1	0.556796	0.00145723
C9	10	CBF1	0.557846	0.00132285
C9	11	CBF1	0.558279	0.000571498
C9	12	CBF1	0.559957	0.00106541
C9	13	CBF1	0.56208	0.00200373
C9	14	CBF1	0.562524	0.00126413
C9	15	CBF1	0.56337	0.000926078
C9	16	CBF1	0.565422	0.00179347
C9	17	CBF1	0.566696	0.00188374
C9	18	CBF1	0.566754	0.000756944
C9	19	CBF1	0.566448	-0.000733383
C9	20	CBF1	0.568438	7.2321e-05
C9	21	CBF1	0.568337	-0.00121231
C9	22	CBF1	0.570547	-0.000186546
C9	23	CBF1	0.570692	-0.00122596
C9	24	CBF1	0.571652	-0.00145023
C9	25	CBF1	0.57273	-0.001556
C9	26	CBF1	0.573428	-0.00204234
C9	27	CBF1	0.574995	-0.00165942
C9	28	CBF1	0.576357	-0.00148236
C9	29	CBF1	0.578988	-3.5254e-05
C9	30	CBF1	0.584435	0.00422734
C9	31	CBF1	0.593154	0.0117629
C9	32	CBF1	0.611269	0.0286928
C9	33	CBF1	0.643974	0.0602141
C9	34	CBF1	0.703262	0.118318
C9	35	CBF1	0.809036	0.222908
C9	36	CBF1	0.979493	0.392181
C9	37	CBF1	1.21904	0.630547
C9	38	CBF1	1.50428	0.914603
C9	39	CBF1	1.78392	1.19305
C9	40	CBF1	2.02433	1.43228
C10	1	CBF1	0.532029	-0.00881083
C10	2	CBF1	0.534258	-0.00695197
C10	3	CBF1	0.534782	-0.00679898
C10	4	CBF1	0.536331	-0.00562122
C10	5	CBF1	0.538942	-0.00338082
C10	6	CBF1	0.54048	-0.00221361
C10	7	CBF1	0.540744	-0.00231985
C10	8	CBF1	0.541596	-0.00183856
C10	9	CBF1	0.544978	0.00117222
C10	10	CBF1	0.543554	-0.000621839
C10	11	CBF1	0.545937	0.00138944
C10	12	CBF1	0.545609	0.000690788
C10	13	CBF1	0.546748	0.00145895
C10	14	CBF1	0.548207	0.0025476
C10	15	CBF1	0.549094	0.00306429
C10	16	CBF1	0.550622	0.00422066
C10	17	CBF1	0.549042	0.00227073
C10	18	CBF1	0.549825	0.0026827
C10	19	CBF1	0.550023	0.00251012
C10	20	CBF1	0.550605	0.00272121
C10	21	CBF1	0.551625	0.00337034
C10	22	CBF1	0.550691	0.00206599
C10	23	CBF1	0.552297	0.0033008
C10	24	CBF1	0.552432	0.00306462
C10	25	CBF1	0.550727	0.000989166
C10	26	CBF1	0.552363	0.00225401
C10	27	CBF1	0.552312	0.00183318
C10	28	CBF1	0.55056	-0.000290258
C10	29	CBF1	0.550483	-0.000737852
C10	30	CBF1	0.553312	0.00172058
C10	31	CBF1	0.552633	0.0006705
C10	32	CBF1	0.550259	-0.0020745
C10	33	CBF1	0.552064	-0.000640014
C10	34	CBF1	0.549549	-0.00352592
C10	35	CBF1	0.550633	-0.00281193
C10	36	CBF1	0.550332	-0.00348394
C10	37	CBF1	0.552011	-0.0021757
C10	38	CBF1	0.552209	-0.00234905
C10	39	CBF1	0.551815	-0.00311386
C10	40	CBF1	0.552919	-0.00238016
C11	1	CBF1	0.53129	-0.00531719
C11	2	CBF1	0.530865	-0.00622618
C11	3	CBF1	0.533319	-0.00425609
C11	4	CBF1	0.534038	-0.00402127
C11	5	CBF1	0.535865	-0.00267822
C11	6	CBF1	0.536312	-0.00271538
C11	7	CBF1	0.538099	-0.00141244
C11	8	CBF1	0.539388	-0.000607503
C11	9	CBF1	0.541132	0.000653292
C11	10	CBF1	0.541182	0.000218931
C11	11	CBF1	0.542992	0.00154464
C11	12	CBF1	0.543673	0.00174173
C11	13	CBF1	0.544849	0.00243389
C11	14	CBF1	0.544017	0.0011184
C11	15	CBF1	0.545141	0.00175799
C11	16	CBF1	0.546037	0.00217049
C11	17	CBF1	0.545509	0.0011585
C11	18	CBF1	0.546397	0.001562
C11	19	CBF1	0.547086	0.0017675
C11	20	CBF1	0.547339	0.00153657
C11	21	CBF1	0.547479	0.00119239
C11	22	CBF1	0.548731	0.00196055
C11	23	CBF1	0.548229	0.000974788
C11	24	CBF1	0.547622	-0.000116595
C11	25	CBF1	0.550037	0.00181469
C11	26	CBF1	0.550799	0.00209267
C11	27	CBF1	0.549831	0.000640914
C11	28	CBF1	0.55087	0.00119623
C11	29	CBF1	0.549969	-0.000188946
C11	30	CBF1	0.551178	0.000535884
C11	31	CBF1	0.551615	0.00048931
C11	32	CBF1	0.551182	-0.000428206
C11	33	CBF1	0.551664	-0.000429718
C11	34	CBF1	0.550989	-0.00158917
C11	35	CBF1	0.550969	-0.00209303
C11	36	CBF1	0.55271	-0.00083611
C11	37	CBF1	0.550764	-0.00326621
C11	38	CBF1	0.552749	-0.00176438
C11	39	CBF1	0.55284	-0.00215809
C11	40	CBF1	0.552983	-0.00249827
C12	1	CBF1	0.519348	-0.008795
C12	2	CBF1	0.521516	-0.00720676
C12	3	CBF1	0.522895	-0.00640644
C12	4	CBF1	0.525158	-0.00472344
C12	5	CBF1	0.527752	-0.00270843
C12	6	CBF1	0.528877	-0.0021631
C12	7	CBF1	0.530955	-0.000663556
C12	8	CBF1	0.532345	0.000146124
C12	9	CBF1	0.532127	-0.0006509
C12	10	CBF1	0.533633	0.000275545
C12	11	CBF1	0.535308	0.00137145
C12	12	CBF1	0.536587	0.00207157
C12	13	CBF1	0.535828	0.000732385
C12	14	CBF1	0.537787	0.00211218
C12	15	CBF1	0.539249	0.00299559
C12	16	CBF1	0.539664	0.0028308
C12	17	CBF1	0.539946	0.00253302
C12	18	CBF1	0.540255	0.00226314
C12	19	CBF1	0.54068	0.00210925
C12	20	CBF1	0.541139	0.00198868
C12	21	CBF1	0.541316	0.00158612
C12	22	CBF1	0.542509	0.00219976
C12	23	CBF1	0.542385	0.00149673
C12	24	CBF1	0.541967	0.000498724
C12	25	CBF1	0.542481	0.000433705
C12	26	CBF1	0.543871	0.00124392
C12	27	CBF1	0.543779	0.00057314
C12	28	CBF1	0.544532	0.0007466
C12	29	CBF1	0.545184	0.000819744
C12	30	CBF1	0.544058	-0.000886429
C12	31	CBF1	0.545097	-0.00042651
C12	32	CBF1	0.545947	-0.000156133
C12	33	CBF1	0.545057	-0.00162508
C12	34	CBF1	0.546368	-0.000893304
C12	35	CBF1	0.546924	-0.00091648
C12	36	CBF1	0.546846	-0.00157445
C12	37	CBF1	0.546984	-0.00201515
C12	38	CBF1	0.54705	-0.00252905
C12	39	CBF1	0.547468	-0.00268974
C12	40	CBF1	0.547897	-0.00284029
D1	1	CBF3	0.698438	0.00282842
D1	2	CBF3	0.695311	-0.000860842
D1	3	CBF3	0.695451	-0.00128383
D1	4	CBF3	0.696129	-0.00116859
D1	5	CBF3	0.696248	-0.00161255
D1	6	CBF3	0.698085	-0.000337821
D1	7	CBF3	0.699023	3.70604e-05
D1	8	CBF3	0.700019	0.000470294
D1	9	CBF3	0.700205	9.37994e-05
D1	10	CBF3	0.702634	0.00196029
D1	11	CBF3	0.703264	0.00202749
D1	12	CBF3	0.702324	0.000524645
D1	13	CBF3	0.70357	0.0012075
D1	14	CBF3	0.702516	-0.000408709
D1	15	CBF3	0.705312	0.00182464
D1	16	CBF3	0.703999	-5.19202e-05
D1	17	CBF3	0.706211	0.00159808
D1	18	CBF3	0.703928	-0.00124849
D1	19	CBF3	0.705751	1.21181e-05
D1	20	CBF3	0.705921	-0.000380113
D1	21	CBF3	0.705458	-0.00140642
D1	22	CBF3	0.706528	-0.000899035
D1	23	CBF3	0.706183	-0.00180697
D1	24	CBF3	0.70718	-0.0013723
D1	25	CBF3	0.711336	0.00222081
D1	26	CBF3	0.717703	0.00802484
D1	27	CBF3	0.72785	0.0176096
D1	28	CBF3	0.749968	0.039164
D1	29	CBF3	0.793232	0.0818653
D1	30	CBF3	0.869737	0.157808
D1	31	CBF3	1.00079	0.288294
D1	32	CBF3	1.21241	0.499351
D1	33	CBF3	1.49911	0.785497
D1	34	CBF3	1.81752	1.10334
D1	35	CBF3	2.12705	1.41231
D1	36	CBF3	2.37925	1.66394
D1	37	CBF3	2.57433	1.85846
D1	38	CBF3	2.73408	2.01765
D1	39	CBF3	2.85738	2.14039
D1	40	CBF3	2.95825	2.24069
D2	1	CBF3	0.672446	-0.000648099
D2	2	CBF3	0.672209	-0.00235069
D2	3	CBF3	0.6742	-0.0018246
D2	4	CBF3	0.676277	-0.00121376
D2	5	CBF3	0.677766	-0.00119038
D2	6	CBF3	0.680211	-0.000210399
D2	7	CBF3	0.682244	0.000357054
D2	8	CBF3	0.685046	0.00169376
D2	9	CBF3	0.687151	0.00233352
D2	10	CBF3	0.688047	0.00176383
D2	11	CBF3	0.689148	0.00139925
D2	12	CBF3	0.689648	0.000433371
D2	13	CBF3	0.69164	0.000959756
D2	14	CBF3	0.692465	0.000319737
D2	15	CBF3	0.693821	0.000209724
D2	16	CBF3	0.694443	-0.000632891
D2	17	CBF3	0.696552	9.78317e-06
D2	18	CBF3	0.696312	-0.00169507
D2	19	CBF3	0.698651	-0.000821788
D2	20	CBF3	0.6986	-0.00233811
D2	21	CBF3	0.700486	-0.00191788
D2	22	CBF3	0.702389	-0.00148007
D2	23	CBF3	0.703386	-0.00194843
D2	24	CBF3	0.708979	0.00217897
D2	25	CBF3	0.71188	0.00361463
D2	26	CBF3	0.720998	0.0112673
D2	27	CBF3	0.738154	0.0269579
D2	28	CBF3	0.772567	0.0599054
D2	29	CBF3	0.834209	0.120082
D2	30	CBF3	0.944352	0.228759
D2	31	CBF3	1.13104	0.413986
D2	32	CBF3	1.4114	0.69288
D2	33	CBF3	1.76576	1.04577
D2	34	CBF3	2.13559	1.41414
D2	35	CBF3	2.47072	1.7478
D2	36	CBF3	2.73752	2.01313
D2	37	CBF3	2.93849	2.21264
D2	38	CBF3	3.10337	2.37606
D2	39	CBF3	3.23368	2.50489
D2	40	CBF3	3.33707	2.60682
D3	1	CBF3	0.652946	7.24308e-06
D3	2	CBF3	0.651938	-0.00210202
D3	3	CBF3	0.655112	-2.91771e-05
D3	4	CBF3	0.653828	-0.00241339
D3	5	CBF3	0.656726	-0.000616404
D3	6	CBF3	0.6583	-0.00014371
D3	7	CBF3	0.65929	-0.000254367
D3	8	CBF3	0.661386	0.000739987
D3	9	CBF3	0.662179	0.000432158
D3	10	CBF3	0.664269	0.00142085
D3	11	CBF3	0.665567	0.00161787
D3	12	CBF3	0.666943	0.00189327
D3	13	CBF3	0.667951	0.00179978
D3	14	CBF3	0.667561	0.000309278
D3	15	CBF3	0.669077	0.000723857
D3	16	CBF3	0.669172	-0.000281883
D3	17	CBF3	0.66947	-0.00108485
D3	18	CBF3	0.670826	-0.000829234
D3	19	CBF3	0.670062	-0.00269465
D3	20	CBF3	0.67179	-0.00206722
D3	21	CBF3	0.674502	-0.000457095
D3	22	CBF3	0.674485	-0.00157459
D3	23	CBF3	0.677289	0.000128698
D3	24	CBF3	0.678733	0.000471692
D3	25	CBF3	0.682272	0.00290913
D3	26	CBF3	0.691868	0.0114041
D3	27	CBF3	0.70439	0.0228252
D3	28	CBF3	0.733265	0.0505991
D3	29	CBF3	0.78553	0.101764
D3	30	CBF3	0.878663	0.193795
D3	31	CBF3	1.04013	0.354159
D3	32	CBF3	1.29047	0.603396
D3	33	CBF3	1.62664	0.93847
D3	34	CBF3	1.98994	1.30067
D3	35	CBF3	2.32608	1.63571
D3	36	CBF3	2.5968	1.90533
D3	37	CBF3	2.80593	2.11335
D3	38	CBF3	2.97325	2.27958
D3	39	CBF3	3.10544	2.41067
D3	40	CBF3	3.20448	2.50861
D4	1	CBF3	0.638427	0.00251882
D4	2	CBF3	0.637923	0.000703723
D4	3	CBF3	0.638115	-0.000416083
D4	4	CBF3	0.637307	-0.00253588
D4	5	CBF3	0.64008	-0.00107421
D4	6	CBF3	0.641743	-0.000722909
D4	7	CBF3	0.643993	0.000215195
D4	8	CBF3	0.645011	-7.79542e-05
D4	9	CBF3	0.647509	0.00110805
D4	10	CBF3	0.647679	-3.36354e-05
D4	11	CBF3	0.6502	0.00117579
D4	12	CBF3	0.653608	0.00327302
D4	13	CBF3	0.65262	0.000972748
D4	14	CBF3	0.653042	8.32547e-05
D4	15	CBF3	0.656697	0.0024269
D4	16	CBF3	0.656808	0.0012268
D4	17	CBF3	0.65691	1.74106e-05
D4	18	CBF3	0.657838	-0.000366278
D4	19	CBF3	0.659393	-0.000123224
D4	20	CBF3	0.658585	-0.00224284
D4	21	CBF3	0.66015	-0.00198888
D4	22	CBF3	0.662005	-0.00144553
D4	23	CBF3	0.663724	-0.00103875
D4	24	CBF3	0.665767	-0.00030741
D4	25	CBF3	0.66926	0.0018744
D4	26	CBF3	0.677263	0.00856614
D4	27	CBF3	0.689934	0.0199249
D4	28	CBF3	0.716502	0.0451817
D4	29	CBF3	0.768009	0.0953776
D4	30	CBF3	0.857139	0.183195
D4	31	CBF3	1.01878	0.343525
D4	32	CBF3	1.27407	0.597501
D4	33	CBF3	1.61771	0.939831
D4	34	CBF3	2.00193	1.32274
D4	35	CBF3	2.37383	1.69333
D4	36	CBF3	2.6801	1.99829
D4	37	CBF3	2.91193	2.2288
D4	38	CBF3	3.10958	2.42515
D4	39	CBF3	3.26472	2.57897
D4	40	CBF3	3.38431	2.69725
D5	1	CBF3	0.625606	-0.00138413
D5	2	CBF3	0.628931	0.000478859
D5	3	CBF3	0.62849	-0.00142296
D5	4	CBF3	0.63012	-0.00125501
D5	5	CBF3	0.631866	-0.000969763
D5	6	CBF3	0.632944	-0.00135369
D5	7	CBF3	0.635851	9.15833e-05
D5	8	CBF3	0.637714	0.000493361
D5	9	CBF3	0.640006	0.00132447
D5	10	CBF3	0.641212	0.00106875
D5	11	CBF3	0.643215	0.00160994
D5	12	CBF3	0.644324	0.00125749
D5	13	CBF3	0.646727	0.00219904
D5	14	CBF3	0.647478	0.00148824
D5	15	CBF3	0.647993	0.000542
D5	16	CBF3	0.649612	0.000699638
D5	17	CBF3	0.649245	-0.00112899
D5	18	CBF3	0.651632	-0.00020281
D5	19	CBF3	0.652145	-0.00115149
D5	20	CBF3	0.652645	-0.00211341
D5	21	CBF3	0.654833	-0.00138661
D5	22	CBF3	0.655313	-0.00236831
D5	23	CBF3	0.659298	0.000155449
D5	24	CBF3	0.663027	0.00242309
D5	25	CBF3	0.668257	0.00619194
D5	26	CBF3	0.682551	0.0190237
D5	27	CBF3	0.706662	0.0416735
D5	28	CBF3	0.749521	0.0830713
D5	29	CBF3	0.832691	0.16478
D5	30	CBF3	0.975976	0.306603
D5	31	CBF3	1.20951	0.538674
D5	32	CBF3	1.53948	0.867187
D5	33	CBF3	1.92949	1.25573
D5	34	CBF3	2.29845	1.62323
D5	35	CBF3	2.60962	1.93294
D5	36	CBF3	2.8495	2.17136
D5	37	CBF3	3.03871	2.35911
D5	38	CBF3	3.19392	2.51286
D5	39	CBF3	3.31797	2.63544
D5	40	CBF3	3.41026	2.72627
D6	1	CBF3	0.621729	3.72642e-05
D6	2	CBF3	0.623116	-6.28721e-05
D6	3	CBF3	0.621809	-0.00285791
D6	4	CBF3	0.624261	-0.00189345
D6	5	CBF3	0.625893	-0.00174885
D6	6	CBF3	0.629217	8.7747e-05
D6	7	CBF3	0.630249	-0.000367156
D6	8	CBF3	0.633686	0.00158203
D6	9	CBF3	0.635107	0.00151575
D6	10	CBF3	0.63772	0.00264133
D6	11	CBF3	0.638458	0.00189198
D6	12	CBF3	0.639316	0.00126202
D6	13	CBF3	0.64056	0.00101901
D6	14	CBF3	0.643209	0.00218082
D6	15	CBF3	0.643226	0.000709956
D6	16	CBF3	0.64449	0.000486319
D6	17	CBF3	0.644992	-0.000499364
D6	18	CBF3	0.646583	-0.000395176
D6	19	CBF3	0.646802	-0.00166422
D6	20	CBF3	0.648228	-0.00172531
D6	21	CBF3	0.650658	-0.000782607
D6	22	CBF3	0.650744	-0.00218379
D6	23	CBF3	0.652881	-0.00153446
D6	24	CBF3	0.655228	-0.000675022
D6	25	CBF3	0.660341	0.00295037
D6	26	CBF3	0.670114	0.0112365
D6	27	CBF3	0.685586	0.0252204
D6	28	CBF3	0.716504	0.054651
D6	29	CBF3	0.774071	0.110731
D6	30	CBF3	0.87822	0.213393
D6	31	CBF3	1.05788	0.39157
D6	32	CBF3	1.33281	0.665009
D6	33	CBF3	1.69632	1.02703
D6	34	CBF3	2.08971	1.41893
D6	35	CBF3	2.45225	1.77999
D6	36	CBF3	2.73544	2.06168
D6	37	CBF3	2.96241	2.28717
D6	38	CBF3	3.14404	2.46731
D6	39	CBF3	3.28749	2.60927
D6	40	CBF3	3.40055	2.72085
D7	1	CBF1	0.51804	-0.00862553
D7	2	CBF1	0.522928	-0.00479702
D7	3	CBF1	0.524159	-0.00462485
D7	4	CBF1	0.52558	-0.00426229
D7	5	CBF1	0.528722	-0.00217937
D7	6	CBF1	0.530802	-0.0011586
D7	7	CBF1	0.531446	-0.0015737
D7	8	CBF1	0.53408	1.56951e-06
D7	9	CBF1	0.536269	0.00113207
D7	10	CBF1	0.537054	0.000858407
D7	11	CBF1	0.539514	0.00225963
D7	12	CBF1	0.541434	0.00312007
D7	13	CBF1	0.542509	0.00313632
D7	14	CBF1	0.542968	0.00253632
D7	15	CBF1	0.544314	0.00282335
D7	16	CBF1	0.54537	0.00282047
D7	17	CBF1	0.545569	0.00196119
D7	18	CBF1	0.546544	0.00187683
D7	19	CBF1	0.547857	0.00213079
D7	20	CBF1	0.54692	0.000134909
D7	21	CBF1	0.549638	0.00179446
D7	22	CBF1	0.548899	-4.00907e-06
D7	23	CBF1	0.54973	-0.000231122
D7	24	CBF1	0.550323	-0.000697071
D7	25	CBF1	0.549109	-0.00297077
D7	26	CBF1	0.550721	-0.00241754
D7	27	CBF1	0.551495	-0.00270253
D7	28	CBF1	0.551885	-0.00337054
D7	29	CBF1	0.554026	-0.00228873
D7	30	CBF1	0.556177	-0.00119691
D7	31	CBF1	0.561524	0.00309162
D7	32	CBF1	0.570732	0.0112402
D7	33	CBF1	0.589548	0.0289977
D7	34	CBF1	0.623104	0.0614945
D7	35	CBF1	0.685108	0.12244
D7	36	CBF1	0.792662	0.228935
D7	37	CBF1	0.959042	0.394256
D7	38	CBF1	1.18642	0.620579
D7	39	CBF1	1.42985	0.862942
D7	40	CBF1	1.64825	1.08028
D8	1	CBF1	0.52219	-0.00699937
D8	2	CBF1	0.523338	-0.00716168
D8	3	CBF1	0.52857	-0.00324037
D8	4	CBF1	0.529463	-0.00365738
D8	5	CBF1	0.533063	-0.00136774
D8	6	CBF1	0.534411	-0.00133056
D8	7	CBF1	0.536118	-0.000934201
D8	8	CBF1	0.539038	0.000675826
D8	9	CBF1	0.540671	0.000998631
D8	10	CBF1	0.542255	0.00127172
D8	11	CBF1	0.543859	0.00156568
D8	12	CBF1	0.545213	0.0016096
D8	13	CBF1	0.547913	0.00299938
D8	14	CBF1	0.548873	0.00264889
D8	15	CBF1	0.549617	0.00208246
D8	16	CBF1	0.550111	0.00126604
D8	17	CBF1	0.551597	0.0014415
D8	18	CBF1	0.553416	0.00195069
D8	19	CBF1	0.554421	0.00164478
D8	20	CBF1	0.554827	0.000740149
D8	21	CBF1	0.555808	0.000410641
D8	22	CBF1	0.556286	-0.000421633
D8	23	CBF1	0.556984	-0.00103391
D8	24	CBF1	0.558729	-0.000599045
D8	25	CBF1	0.559871	-0.000767382
D8	26	CBF1	0.559504	-0.00244479
D8	27	CBF1	0.559379	-0.00388014
D8	28	CBF1	0.561543	-0.00302632
D8	29	CBF1	0.562456	-0.0034236
D8	30	CBF1	0.564335	-0.00285487
D8	31	CBF1	0.56932	0.00081903
D8	32	CBF1	0.576668	0.00685691
D8	33	CBF1	0.586638	0.015517
D8	34	CBF1	0.610211	0.0377796
D8	35	CBF1	0.653902	0.0801598
D8	36	CBF1	0.730862	0.155809
D8	37	CBF1	0.862824	0.286461
D8	38	CBF1	1.06283	0.485156
D8	39	CBF1	1.32516	0.746181
D8	40	CBF1	1.60196	1.02167
D9	1	CBF1	0.518052	-0.00967544
D9	2	CBF1	0.520588	-0.00790701
D9	3	CBF1	0.524209	-0.00505229
D9	4	CBF1	0.524824	-0.00520427
D9	5	CBF1	0.526421	-0.00437372
D9	6	CBF1	0.52822	-0.00334165
D9	7	CBF1	0.529242	-0.0030864
D9	8	CBF1	0.532559	-0.000537094
D9	9	CBF1	0.534365	0.000502011
D9	10	CBF1	0.534607	-2.22543e-05
D9	11	CBF1	0.536305	0.000909085
D9	12	CBF1	0.537077	0.00091405
D9	13	CBF1	0.538884	0.00195447
D9	14	CBF1	0.540491	0.0027939
D9	15	CBF1	0.541512	0.00304878
D9	16	CBF1	0.541496	0.00226583
D9	17	CBF1	0.542295	0.00229732
D9	18	CBF1	0.544366	0.00360167
D9	19	CBF1	0.543837	0.0023054
D9	20	CBF1	0.545021	0.00272337
D9	21	CBF1	0.545427	0.0023617
D9	22	CBF1	0.547508	0.00367648
D9	23	CBF1	0.547532	0.00293358
D9	24	CBF1	0.548008	0.00264303
D9	25	CBF1	0.547284	0.00115186
D9	26	CBF1	0.548604	0.00170453
D9	27	CBF1	0.548833	0.00116691
D9	28	CBF1	0.548997	0.000563731
D9	29	CBF1	0.549468	0.000268347
D9	30	CBF1	0.550363	0.000396872
D9	31	CBF1	0.549326	-0.00140788
D9	32	CBF1	0.550612	-0.00088817
D9	33	CBF1	0.551556	-0.000711544
D9	34	CBF1	0.550651	-0.00238272
D9	35	CBF1	0.553068	-0.000733265
D9	36	CBF1	0.55281	-0.0017572
D9	37	CBF1	0.551847	-0.00348786
D9	38	CBF1	0.552509	-0.00359227
D9	39	CBF1	0.553264	-0.00360435
D9	40	CBF1	0.554085	-0.00355057
D10	1	CBF1	0.555488	-0.00205379
D10	2	CBF1	0.554908	-0.00330913
D10	3	CBF1	0.55403	-0.00486112
D10	4	CBF1	0.556754	-0.00281246
D10	5	CBF1	0.558654	-0.00158675
D10	6	CBF1	0.560443	-0.000471914
D10	7	CBF1	0.559826	-0.00176355
D10	8	CBF1	0.563766	0.00150194
D10	9	CBF1	0.563852	0.000912625
D10	10	CBF1	0.565835	0.00222118
D10	11	CBF1	0.566534	0.00224549
D10	12	CBF1	0.566853	0.00189018
D10	13	CBF1	0.567058	0.00142019
D10	14	CBF1	0.567231	0.000918437
D10	15	CBF1	0.569154	0.00216727
D10	16	CBF1	0.570212	0.0025501
D10	17	CBF1	0.570409	0.00207284
D10	18	CBF1	0.570679	0.0016686
D10	19	CBF1	0.57124	0.00155522
D10	20	CBF1	0.570518	0.000157966
D10	21	CBF1	0.570874	-0.000160806
D10	22	CBF1	0.57107	-0.000639258
D10	23	CBF1	0.572021	-0.000362699
D10	24	CBF1	0.571614	-0.00144465
D10	25	CBF1	0.572307	-0.00142582
D10	26	CBF1	0.57267	-0.00173732
D10	27	CBF1	0.572045	-0.00303682
D10	28	CBF1	0.573516	-0.00224069
D10	29	CBF1	0.574908	-0.00152288
D10	30	CBF1	0.576757	-0.000348494
D10	31	CBF1	0.580914	0.00313319
D10	32	CBF1	0.588649	0.0101942
D10	33	CBF1	0.600994	0.0218639
D10	34	CBF1	0.627883	0.048079
D10	35	CBF1	0.678892	0.0984127
D10	36	CBF1	0.767644	0.18649
D10	37	CBF1	0.92227	0.340442
D10	38	CBF1	1.16068	0.578182
D10	39	CBF1	1.47078	0.887605
D10	40	CBF1	1.80081	1.21696
D11	1	CBF1	0.55098	-0.00586076
D11	2	CBF1	0.550068	-0.00761904
D11	3	CBF1	0.552216	-0.00631877
D11	4	CBF1	0.554621	-0.00476058
D11	5	CBF1	0.556197	-0.00403138
D11	6	CBF1	0.558373	-0.00270208
D11	7	CBF1	0.559334	-0.00258752
D11	8	CBF1	0.561505	-0.00126305
D11	9	CBF1	0.563842	0.000227063
D11	10	CBF1	0.56608	0.0016177
D11	11	CBF1	0.567088	0.00177946
D11	12	CBF1	0.568166	0.00201013
D11	13	CBF1	0.568031	0.00102886
D11	14	CBF1	0.570617	0.00276752
D11	15	CBF1	0.569866	0.00117029
D11	16	CBF1	0.572675	0.00313194
D11	17	CBF1	0.572809	0.00241901
D11	18	CBF1	0.572585	0.00134886
D11	19	CBF1	0.574726	0.0026427
D11	20	CBF1	0.575321	0.00239146
D11	21	CBF1	0.576586	0.00280905
D11	22	CBF1	0.578089	0.00346566
D11	23	CBF1	0.578211	0.00274015
D11	24	CBF1	0.577314	0.000996648
D11	25	CBF1	0.57905	0.00188589
D11	26	CBF1	0.579848	0.00183725
D11	27	CBF1	0.579891	0.00103348
D11	28	CBF1	0.581148	0.00144338
D11	29	CBF1	0.580997	0.000445951
D11	30	CBF1	0.580072	-0.00132598
D11	31	CBF1	0.582296	5.10662e-05
D11	32	CBF1	0.583567	0.000475211
D11	33	CBF1	0.582803	-0.00113573
D11	34	CBF1	0.584238	-0.000547132
D11	35	CBF1	0.584104	-0.00152805
D11	36	CBF1	0.583012	-0.00346723
D11	37	CBF1	0.584885	-0.00244084
D11	38	CBF1	0.584588	-0.00358429
D11	39	CBF1	0.584993	-0.00402609
D11	40	CBF1	0.585299	-0.00456688
D12	1	CBF1	0.55591	-0.0070697
D12	2	CBF1	0.556373	-0.00737103
D12	3	CBF1	0.558197	-0.00631045
D12	4	CBF1	0.559743	-0.00552846
D12	5	CBF1	0.562637	-0.00339815
D12	6	CBF1	0.564251	-0.00254726
D12	7	CBF1	0.56618	-0.00138219
D12	8	CBF1	0.567256	-0.00106965
D12	9	CBF1	0.56955	0.000460911
D12	10	CBF1	0.570687	0.000833535
D12	11	CBF1	0.572818	0.00220132
D12	12	CBF1	0.573532	0.00215105
D12	13	CBF1	0.573155	0.00101049
D12	14	CBF1	0.574609	0.00170128
D12	15	CBF1	0.575234	0.00156291
D12	16	CBF1	0.577685	0.00324988
D12	17	CBF1	0.577543	0.00234446
D12	18	CBF1	0.577693	0.00173003
D12	19	CBF1	0.580112	0.00338541
D12	20	CBF1	0.580368	0.00287839
D12	21	CBF1	0.579997	0.00174331
D12	22	CBF1	0.581571	0.00255415
D12	23	CBF1	0.581521	0.00174022
D12	24	CBF1	0.582417	0.00187204
D12	25	CBF1	0.582708	0.00139965
D12	26	CBF1	0.583102	0.00103002
D12	27	CBF1	0.582939	0.000103619
D12	28	CBF1	0.584712	0.00111258
D12	29	CBF1	0.585109	0.00074587
D12	30	CBF1	0.585392	0.000265193
D12	31	CBF1	0.586689	0.000798511
D12	32	CBF1	0.585925	-0.000728882
D12	33	CBF1	0.585481	-0.00193685
D12	34	CBF1	0.586357	-0.00182405
D12	35	CBF1	0.587421	-0.00152414
D12	36	CBF1	0.588137	-0.00157191
D12	37	CBF1	0.587552	-0.00292079
D12	38	CBF1	0.588884	-0.0023523
D12	39	CBF1	0.58822	-0.00377974
D12	40	CBF1	0.588994	-0.00376927
E1	1	CBF3	0.675966	0.000413199
E1	2	CBF3	0.674298	-0.00306025
E1	3	CBF3	0.675131	-0.00403286
E1	4	CBF3	0.679346	-0.00162279
E1	5	CBF3	0.680836	-0.00193827
E1	6	CBF3	0.683651	-0.000929145
E1	7	CBF3	0.687345	0.000959443
E1	8	CBF3	0.688841	0.000650347
E1	9	CBF3	0.692346	0.00234981
E1	10	CBF3	0.69502	0.00321892
E1	11	CBF3	0.697175	0.00356798
E1	12	CBF3	0.696587	0.00117439
E1	13	CBF3	0.698782	0.00156469
E1	14	CBF3	0.700906	0.0018833
E1	15	CBF3	0.700096	-0.000732917
E1	16	CBF3	0.702547	-8.63706e-05
E1	17	CBF3	0.703978	-0.000460852
E1	18	CBF3	0.706561	0.000316228
E1	19	CBF3	0.706058	-0.00199165
E1	20	CBF3	0.70724	-0.00261593
E1	21	CBF3	0.710396	-0.00126504
E1	22	CBF3	0.713457	-9.27533e-06
E1	23	CBF3	0.722065	0.00679306
E1	24	CBF3	0.73496	0.0178831
E1	25	CBF3	0.76116	0.0422777
E1	26	CBF3	0.809381	0.0886926
E1	27	CBF3	0.895328	0.172834
E1	28	CBF3	1.04366	0.319364
E1	29	CBF3	1.27853	0.552429
E1	30	CBF3	1.59253	0.864617
E1	31	CBF3	1.94611	1.2164
E1	32	CBF3	2.2839	1.55238
E1	33	CBF3	2.54689	1.81357
E1	34	CBF3	2.76341	2.02828
E1	35	CBF3	2.94566	2.20872
E1	36	CBF3	3.08476	2.34602
E1	37	CBF3	3.18516	2.44461
E1	38	CBF3	3.26666	2.52431
E1	39	CBF3	3.34776	2.6036
E1	40	CBF3	3.40176	2.65579
E2	1	CBF3	0.661111	-0.00182755
E2	2	CBF3	0.662579	-0.00188707
E2	3	CBF3	0.664377	-0.00161626
E2	4	CBF3	0.66546	-0.00206142
E2	5	CBF3	0.668165	-0.000882954
E2	6	CBF3	0.669623	-0.000952667
E2	7	CBF3	0.673222	0.00111886
E2	8	CBF3	0.674757	0.00112597
E2	9	CBF3	0.675785	0.000626988
E2	10	CBF3	0.677663	0.000977667
E2	11	CBF3	0.680587	0.00237369
E2	12	CBF3	0.682254	0.00251337
E2	13	CBF3	0.683145	0.00187771
E2	14	CBF3	0.684026	0.00123073
E2	15	CBF3	0.683669	-0.000652994
E2	16	CBF3	0.685336	-0.000513615
E2	17	CBF3	0.685965	-0.00141255
E2	18	CBF3	0.686885	-0.00201995
E2	19	CBF3	0.689386	-0.00104641
E2	20	CBF3	0.68896	-0.00299939
E2	21	CBF3	0.693069	-0.000418245
E2	22	CBF3	0.697746	0.00273147
E2	23	CBF3	0.705879	0.00933736
E2	24	CBF3	0.720254	0.0221846
E2	25	CBF3	0.746153	0.046557
E2	26	CBF3	0.792881	0.0917569
E2	27	CBF3	0.881902	0.179251
E2	28	CBF3	1.03704	0.332865
E2	29	CBF3	1.28028	0.574578
E2	30	CBF3	1.61041	0.903172
E2	31	CBF3	1.98812	1.27936
E2	32	CBF3	2.34307	1.63278
E2	33	CBF3	2.62403	1.91222
[truncated: 1,847 more rows]

## Sheet: BioGroup Analysis Result
Block Type	96alum
Chemistry	SYBR_GREEN
Experiment File Name	D:\HAIFENG\CBF117.eds
Experiment Run End Time	2021-08-27 15:22:27 PM CST
Instrument Type	sds7500
Passive Reference	ROX
Biogroup Name	Target Name	Task	RQ	RQ Min	RQ Max	Cт Mean	ΔCт Mean	ΔCт SE	ΔΔCт
Analysis Type	Singleplex
Endogenous Control	CBF3
RQ Min/Max Confidence Level	95.0
Reference Biogroup Name

## Sheet: Technical Analysis Result
Block Type	96alum
Chemistry	SYBR_GREEN
Experiment File Name	D:\HAIFENG\CBF117.eds
Experiment Run End Time	2021-08-27 15:22:27 PM CST
Instrument Type	sds7500
Passive Reference	ROX
Sample Name	Target Name	Task	RQ	RQ Min	RQ Max	Cт Mean	ΔCт Mean	ΔCт SE	ΔΔCт
C3-1	CBF1	UNKNOWN	1	0.41819	2.39126	33.1453	7.39687	0.395221	0
C12-3	CBF1	UNKNOWN
C3-2	CBF1	UNKNOWN	0.809041	0.256302	2.55381	32.4119	7.70258	0.597298	0.305716
C18-1	CBF1	UNKNOWN
C3-3	CBF1	UNKNOWN	1.16949	0.456061	2.99898	33.1193	7.17098	0.489326	-0.225884
C18-2	CBF1	UNKNOWN
C6-1	CBF1	UNKNOWN	2.89494	1.37613	6.09003	33.504	5.86334	0.337135	-1.53353
C18-3	CBF1	UNKNOWN	2.41724			33.4975	6.12351		-1.27336
C6-2	CBF1	UNKNOWN	0.841388	0.300535	2.35558	32.3965	7.64603	0.534943	0.249157
C24-1	CBF1	UNKNOWN	1.1901	0.139049	10.1858	33.7188	7.14579	1.1156	-0.25108
C6-3	CBF1	UNKNOWN	0.810215	0.261569	2.50966	32.6695	7.70049	0.587483	0.303623
C24-2	CBF1	UNKNOWN	2.42579	1.43665	4.09596	32.4714	6.11841	0.2722	-1.27846
C12-1	CBF1	UNKNOWN
C24-3	CBF1	UNKNOWN	4.98467			33.5061	5.07937		-2.3175
C12-2	CBF1	UNKNOWN	18.4692			35.4145	3.18982		-4.20705
Analysis Type	Singleplex
Endogenous Control	CBF3
RQ Min/Max Confidence Level	95.0
Reference Sample	C3-1
