# Supplementary material for: Genome-wide identification of CBF genes and their responses to cold acclimation in Taraxacum kok-saghyz
Source: PeerJ journal article supplement (doi:10.7717/peerj.13429), 2022-05-12
Supplement: Raw_data.zip [file CBF3-CBF4.xls]

## Sheet: Results
Block Type	96alum
Chemistry	SYBR_GREEN
Experiment File Name	D:\HAIFENG\1117CBF34Untitled.eds
Experiment Run End Time	2013-01-10 03:05:40 AM CST
Instrument Type	sds7500
Passive Reference	ROX
Well	Sample Name	Target Name	Task	Reporter	Quencher	RQ	RQ Min	RQ Max	Cт	Cт Mean	Cт SD	ΔCт	HK Control ΔCт Mean	HK Control ΔCт SE	ΔΔCт	Automatic Ct Threshold	Ct Threshold	Automatic Baseline	Baseline Start	Baseline End	Efficiency	Tm1	Tm2	Tm3	Comments	HIGHSD	NOAMP	EXPFAIL
A2	3-1	CBF3	UNKNOWN	SYBR	None				27.0579	27.0808	0.0229335					TRUE	0.355183	TRUE	3	39	1	63.2519				N	Y	Y
A3	3-1	CBF3	UNKNOWN	SYBR	None				27.0276	27.0808	0.0229335					TRUE	0.355183	TRUE	3	39	1	62.0259				N	Y	Y
A4	3-1	CBF3	UNKNOWN	SYBR	None				27.1286	27.0808	0.0229335					TRUE	0.355183	TRUE	3	39	1	61.6757				N	Y	Y
A5	12-3	CBF3	UNKNOWN	SYBR	None				29.1879	29.197	1.31438					TRUE	0.355183	TRUE	3	27	1	81.991				Y	N	N
A6	12-3	CBF3	UNKNOWN	SYBR	None				29.2099	29.197	1.31438					TRUE	0.355183	TRUE	3	29	1	81.991				Y	N	N
A7	12-3	CBF3	UNKNOWN	SYBR	None				29.1933	29.197	1.31438					TRUE	0.355183	TRUE	3	27	1	82.1661				Y	N	N
A8	6-2	CBF4	UNKNOWN	SYBR	None				26.5195	26.5627	0.091816					TRUE	0.107696	TRUE	3	22	1	84.7931				N	N	N
A9	6-2	CBF4	UNKNOWN	SYBR	None				26.5005	26.5627	0.091816					TRUE	0.107696	TRUE	3	22	1	84.7931				N	N	N
A10	6-2	CBF4	UNKNOWN	SYBR	None				26.6682	26.5627	0.091816					TRUE	0.107696	TRUE	3	22	1	84.7931				N	N	N
B2	3-2	CBF3	UNKNOWN	SYBR	None				27.0384	27.0876	1.52565					TRUE	0.355183	TRUE	3	31	1	82.3413				Y	N	N
B3	3-2	CBF3	UNKNOWN	SYBR	None				27.0687	27.0876	1.52565					TRUE	0.355183	TRUE	3	29	1	82.3413				Y	N	N
B4	3-2	CBF3	UNKNOWN	SYBR	None				27.1871	27.0876	1.52565					TRUE	0.355183	TRUE	3	28	1	82.3413				Y	N	N
B5	24-1	CBF3	UNKNOWN	SYBR	None				30.9891	31.2485	0.0754159					TRUE	0.355183	TRUE	3	24	1	82.3413				N	N	N
B6	24-1	CBF3	UNKNOWN	SYBR	None				31.4707	31.2485	0.0754159					TRUE	0.355183	TRUE	3	24	1	82.3413				N	N	N
B7	24-1	CBF3	UNKNOWN	SYBR	None				30.9862	31.2485	0.0754159					TRUE	0.355183	TRUE	3	24	1	82.3413				N	N	N
B8	6-3	CBF4	UNKNOWN	SYBR	None				27.8698	27.8029	0.184394					TRUE	0.107696	TRUE	3	23	1	84.9683				N	N	N
B9	6-3	CBF4	UNKNOWN	SYBR	None				27.5944	27.8029	0.184394					TRUE	0.107696	TRUE	3	23	1	84.9683				N	N	N
B10	6-3	CBF4	UNKNOWN	SYBR	None				27.9446	27.8029	0.184394					TRUE	0.107696	TRUE	3	24	1	84.7931				N	N	N
C2	3-3	CBF3	UNKNOWN	SYBR	None				32.6808	27.0392	0.5339					TRUE	0.355183	TRUE	3	26	1	82.3413				Y	N	N
C3	3-3	CBF3	UNKNOWN	SYBR	None				33.0877	27.0392	0.5339					TRUE	0.355183	TRUE	3	27	1	82.3413				Y	N	N
C4	3-3	CBF3	UNKNOWN	SYBR	None				33.7392	27.0392	0.5339					TRUE	0.355183	TRUE	3	28	1	82.3413				Y	N	N
C5	24-2	CBF3	UNKNOWN	SYBR	None				25.9896	30.6541	0.112497					TRUE	0.355183	TRUE	3	20	1	82.3413				N	N	N
C6	24-2	CBF3	UNKNOWN	SYBR	None				25.7742	30.6541	0.112497					TRUE	0.355183	TRUE	3	20	1	82.3413				N	N	N
C7	24-2	CBF3	UNKNOWN	SYBR	None				25.9382	30.6541	0.112497					TRUE	0.355183	TRUE	3	20	1	82.3413				N	N	N
C8	12-1	CBF4	UNKNOWN	SYBR	None				27.338	27.406	0.196486					TRUE	0.107696	TRUE	3	23	1	85.3185				N	N	N
C9	12-1	CBF4	UNKNOWN	SYBR	None				27.2526	27.406	0.196486					TRUE	0.107696	TRUE	3	23	1	85.3185				N	N	N
C10	12-1	CBF4	UNKNOWN	SYBR	None				27.6275	27.406	0.196486					TRUE	0.107696	TRUE	3	24	1	85.1434				N	N	N
D2	6-1	CBF3	UNKNOWN	SYBR	None				25.8427	25.5917	0.0674422					TRUE	0.355183	TRUE	3	19	1	82.1661				N	N	N
D3	6-1	CBF3	UNKNOWN	SYBR	None				25.8638	25.5917	0.0674422					TRUE	0.355183	TRUE	3	19	1	82.3413				N	N	N
D4	6-1	CBF3	UNKNOWN	SYBR	None				25.3686	25.5917	0.0674422					TRUE	0.355183	TRUE	3	19	1	82.3413				N	N	N
D5	24-3	CBF3	UNKNOWN	SYBR	None				29.9164	30.059	0.144991					TRUE	0.355183	TRUE	3	24	1	82.3413				N	N	N
D6	24-3	CBF3	UNKNOWN	SYBR	None				30.0541	30.059	0.144991					TRUE	0.355183	TRUE	3	24	1	82.3413				N	N	N
D7	24-3	CBF3	UNKNOWN	SYBR	None				30.2063	30.059	0.144991					TRUE	0.355183	TRUE	3	24	1	82.3413				N	N	N
D8	12-2	CBF4	UNKNOWN	SYBR	None				31.4992	31.0243	0.464304					TRUE	0.107696	TRUE	3	27	1	85.3185				N	N	N
D9	12-2	CBF4	UNKNOWN	SYBR	None				30.5714	31.0243	0.464304					TRUE	0.107696	TRUE	3	26	1	85.3185				N	N	N
D10	12-2	CBF4	UNKNOWN	SYBR	None				31.0022	31.0243	0.464304					TRUE	0.107696	TRUE	3	27	1	85.1434				N	N	N
E2	6-2	CBF3	UNKNOWN	SYBR	None				25.4419	24.822	0.851444					TRUE	0.355183	TRUE	3	20	1	82.1661				Y	N	N
E3	6-2	CBF3	UNKNOWN	SYBR	None				24.4213	24.822	0.851444					TRUE	0.355183	TRUE	3	19	1	82.3413				Y	N	N
E4	6-2	CBF3	UNKNOWN	SYBR	None				24.6027	24.822	0.851444					TRUE	0.355183	TRUE	3	18	1	82.3413				Y	N	N
E5	3-1	CBF4	UNKNOWN	SYBR	None				29.5693	29.5808	0.01918					TRUE	0.107696	TRUE	3	39	1	63.6021				N	Y	Y
E6	3-1	CBF4	UNKNOWN	SYBR	None				29.5958	29.5808	0.01918					TRUE	0.107696	TRUE	3	39	1	61.8508				N	Y	Y
E7	3-1	CBF4	UNKNOWN	SYBR	None				29.5946	29.5808	0.01918					TRUE	0.107696	TRUE	3	39	1	63.6021				N	Y	Y
E8	12-3	CBF4	UNKNOWN	SYBR	None				30.6839	30.5787	1.40639					TRUE	0.107696	TRUE	3	29	1	85.3185				Y	N	N
E9	12-3	CBF4	UNKNOWN	SYBR	None				30.5394	30.5787	1.40639					TRUE	0.107696	TRUE	3	39	1	62.2011				N	N	Y
E10	12-3	CBF4	UNKNOWN	SYBR	None				30.5128	30.5787	1.40639					TRUE	0.107696	TRUE	3	32	1	84.9683				Y	N	N
F2	6-3	CBF3	UNKNOWN	SYBR	None				26.343	26.1767	0.162699					TRUE	0.355183	TRUE	3	20	1	81.991				N	N	N
F3	6-3	CBF3	UNKNOWN	SYBR	None				26.0179	26.1767	0.162699					TRUE	0.355183	TRUE	3	20	1	82.1661				N	N	N
F4	6-3	CBF3	UNKNOWN	SYBR	None				26.1691	26.1767	0.162699					TRUE	0.355183	TRUE	3	20	1	82.1661				N	N	N
F5	3-2	CBF4	UNKNOWN	SYBR	None				29.3867	29.3864	0.00962087					TRUE	0.107696	TRUE	3	39	1	64.4778				N	Y	Y
F6	3-2	CBF4	UNKNOWN	SYBR	None				29.3956	29.3864	0.00962087					TRUE	0.107696	TRUE	3	39	1	64.1275				N	Y	Y
F7	3-2	CBF4	UNKNOWN	SYBR	None				29.3768	29.3864	0.00962087					TRUE	0.107696	TRUE	3	39	1	62.7265				N	Y	Y
F8	24-1	CBF4	UNKNOWN	SYBR	None				34.3436	34.2379	0.294169					TRUE	0.107696	TRUE	3	32	1	85.1434				N	N	N
F9	24-1	CBF4	UNKNOWN	SYBR	None				34.1389	34.2379	0.294169					TRUE	0.107696	TRUE	3	33	1	84.9683				N	N	N
F10	24-1	CBF4	UNKNOWN	SYBR	None				34.231	34.2379	0.294169					TRUE	0.107696	TRUE	3	33	1	84.9683				N	N	N
G2	12-1	CBF3	UNKNOWN	SYBR	None				26.3267	26.3623	0.0664016					TRUE	0.355183	TRUE	3	20	1	81.991				N	N	N
G3	12-1	CBF3	UNKNOWN	SYBR	None				26.3213	26.3623	0.0664016					TRUE	0.355183	TRUE	3	20	1	82.1661				N	N	N
G4	12-1	CBF3	UNKNOWN	SYBR	None				26.4389	26.3623	0.0664016					TRUE	0.355183	TRUE	3	20	1	82.1661				N	N	N
G5	3-3	CBF4	UNKNOWN	SYBR	None				29.9478	29.7392	0.118542					TRUE	0.107696	TRUE	3	39	1	64.3026				N	Y	Y
G6	3-3	CBF4	UNKNOWN	SYBR	None				29.6207	29.7392	0.118542					TRUE	0.107696	TRUE	3	39	1	63.427				N	Y	Y
G7	3-3	CBF4	UNKNOWN	SYBR	None				29.6785	29.7392	0.118542					TRUE	0.107696	TRUE	3	39	1	62.2011				N	Y	Y
G8	24-2	CBF4	UNKNOWN	SYBR	None				33.9478	33.749	0.174555					TRUE	0.107696	TRUE	3	26	1	85.1434				N	N	N
G9	24-2	CBF4	UNKNOWN	SYBR	None				33.6207	33.749	0.174555					TRUE	0.107696	TRUE	3	25	1	84.9683				N	N	N
G10	24-2	CBF4	UNKNOWN	SYBR	None				33.6785	33.749	0.174555					TRUE	0.107696	TRUE	3	25	1	84.9683				N	N	N
H2	12-2	CBF3	UNKNOWN	SYBR	None				29.7956	29.5451	0.219803					TRUE	0.355183	TRUE	3	24	1	81.8159				N	N	N
H3	12-2	CBF3	UNKNOWN	SYBR	None				29.3848	29.5451	0.219803					TRUE	0.355183	TRUE	3	24	1	81.8159				N	N	N
H4	12-2	CBF3	UNKNOWN	SYBR	None				29.4548	29.5451	0.219803					TRUE	0.355183	TRUE	3	23	1	81.991				N	N	N
H5	6-1	CBF4	UNKNOWN	SYBR	None				27.0563	26.9111	0.134751					TRUE	0.107696	TRUE	3	23	1	84.7931				N	N	N
H6	6-1	CBF4	UNKNOWN	SYBR	None				26.7901	26.9111	0.134751					TRUE	0.107696	TRUE	3	23	1	84.7931				N	N	N
H7	6-1	CBF4	UNKNOWN	SYBR	None				26.8868	26.9111	0.134751					TRUE	0.107696	TRUE	3	23	1	84.7931				N	N	N
H8	24-3	CBF4	UNKNOWN	SYBR	None				33.7637	33.1116	0.779419					TRUE	0.107696	TRUE	3	30	1	84.7931				Y	N	N
H9	24-3	CBF4	UNKNOWN	SYBR	None				32.2484	33.1116	0.779419					TRUE	0.107696	TRUE	3	28	1	84.7931				Y	N	N
H10	24-3	CBF4	UNKNOWN	SYBR	None				33.3228	33.1116	0.779419					TRUE	0.107696	TRUE	3	29	1	84.618				Y	N	N
Analysis Type	Singleplex
Endogenous Control	CBF3
RQ Min/Max Confidence Level	95.0
Reference Sample	3-1

## Sheet: Raw Data
Block Type	96alum
Chemistry	SYBR_GREEN
Experiment File Name	D:\HAIFENG\1117CBF34Untitled.eds
Experiment Run End Time	2013-01-10 03:05:40 AM CST
Instrument Type	sds7500
Passive Reference	ROX
Well	Cycle	1	2	3	4	5
A1	1	43149.9	5197.93	3174.79	3854.05	1445.39
A2	1	241832	61253.3	41791.1	354643	1744.41
A3	1	207224	51868.9	39312.6	326046	1360.46
A4	1	269546	65514.7	51447.5	394991	1677.85
A5	1	256251	64221.7	50902.2	375118	1769.2
A6	1	195733	48645	43162.2	320963	1149.52
A7	1	263825	64566.8	54567	394691	2023.76
A8	1	239769	56691.2	53323.7	392913	2376.13
A9	1	247349	60074.4	52230.8	391776	1875.85
A10	1	390945	94501.6	70020.9	515844	3402.77
A11	1	0	0	0	0	0
A12	1	0	132.9	105.042	712.6	92.584
B1	1	0	0	0	226.738	33.3037
B2	1	244844	65200.2	46540.1	376653	1974.62
B3	1	197799	52149.4	41851.1	323572	1238.74
B4	1	271094	66614.8	53950.1	387771	8310.6
B5	1	249930	63140.4	53240.3	367221	2274.23
B6	1	203686	50090.4	46540.9	318988	2193.8
B7	1	247720	60107.2	54722.8	376564	2400.92
B8	1	244318	55384.7	55856.9	381610	2553.64
B9	1	218358	53630.2	48142.3	343852	1515.42
B10	1	377617	88174.1	69951.5	482206	3420.25
B11	1	0	79.2574	86.8844	185.858	0
B12	1	0	101.477	0	0	0
C1	1	2451.08	1143.24	612.669	730.19	240.935
C2	1	246386	66137.9	50572.3	387190	2009.74
C3	1	216602	56750	48973.3	356033	1935.64
C4	1	261063	65739	56507.9	387514	2576.67
C5	1	275653	68583.7	60201.7	396965	2866.9
C6	1	214291	53723.9	52569.5	349340	1930.3
C7	1	262412	64956.8	62407.3	410220	2905.73
C8	1	232809	52025.2	58344.6	384737	2321.64
C9	1	218080	48407.7	50412.9	339386	1758.87
C10	1	346362	75795.3	67326.8	447844	3353.19
C11	1	1310.67	333.228	405.648	720.577	803.716
C12	1	0	0	0	748.326	38.4436
D1	1	31100.9	6701.58	5119.87	7084.91	4779.32
D2	1	289946	76660.9	56018.5	405712	1561.96
D3	1	239426	62967.1	53440	367843	2243.32
D4	1	294243	74035.4	64281.8	413992	2735.91
D5	1	307180	77606.5	72750.5	456505	3088.21
D6	1	232200	59582.4	60378.2	379051	2340.41
D7	1	294880	77309.8	74553.9	458089	3550.36
D8	1	231692	56690.8	61669.8	391740	1889.95
D9	1	238802	58572.9	57077.5	363879	2430.01
D10	1	378738	90443.2	77885.2	502617	3134.11
D11	1	17092.1	5033.73	4844.68	7398.1	3134.69
D12	1	10251.1	1316.48	753.023	1273.65	323.226
E1	1	4473.62	1057.76	481.467	761.559	438.752
E2	1	323842	99124.9	70540.7	508778	2082.55
E3	1	282155	76688.9	61934.6	410503	1908.7
E4	1	367924	95198.8	78769.8	484337	3325.7
E5	1	302608	72224.4	76502.8	469661	2956.68
E6	1	221688	52917.4	61599.7	375626	2386.08
E7	1	280765	66774.3	76408.1	459195	2699.38
E8	1	296175	75200.1	78284.2	479401	2969.64
E9	1	314267	87668.6	69810.6	426502	2550.44
E10	1	406095	100153	85229.4	541181	3555.69
E11	1	18332.8	2748.75	1974.02	2481.78	1612.16
E12	1	6383.73	1559.36	1107.07	2731.83	2440.75
F1	1	46481.7	8313.08	6231.28	7283.47	3910.72
F2	1	309007	87872.6	65726	474322	1973.14
F3	1	275039	74962.4	66072.3	438853	2079.68
F4	1	350448	88848	81881.9	514098	3231.63
F5	1	368821	86146.5	92800	579687	2808.09
F6	1	239652	58731.9	65960.5	408407	2109.54
F7	1	303990	74714.1	83584.9	507821	3067.82
F8	1	348521	89481.8	109490	700519	4755.53
F9	1	306221	77791.1	91622.6	607993	3014.38
F10	1	451749	112671	119220	822314	3960.77
F11	1	18848.9	3156.71	2312.29	2327.58	0
F12	1	0	0	0	0	214.869
G1	1	15745.2	4543.49	5191.87	10568.6	14716.7
G2	1	335991	94393.5	68601.5	503737	2414.52
G3	1	320100	85744	72810.7	508743	1825.91
G4	1	378482	96922.6	83753.4	539201	3168.66
G5	1	375861	91986.8	88300.2	557357	3001.2
G6	1	263086	65755.8	67466.5	424102	2589.65
G7	1	309490	77219.1	79035	497744	4728.32
G8	1	297334	74994	76081	480209	2791.78
G9	1	293577	73125.7	70439	454353	2642.75
G10	1	408969	98189.3	84327.3	560247	2896.04
G11	1	11697.6	2950.42	2627.71	4317.99	2757.18
G12	1	87699.4	17079.1	14067.2	19077	11506.9
H1	1	29812.8	5170.75	3830.89	6379.98	6219.71
H2	1	347047	98792.2	66040.4	501832	2239.23
H3	1	316806	89642.5	68439.5	492850	2334.71
H4	1	399293	106131	84540.9	572436	3578.13
H5	1	391042	90772.1	91708.1	593568	3713.8
H6	1	272822	63437.3	64036.6	417546	2574.98
H7	1	328550	76275.8	77475.2	504410	2824.99
H8	1	352429	87555.2	79871.1	523931	3469.47
H9	1	297640	74139.4	67491.4	462090	2863.99
H10	1	459489	109661	91866.7	636380	4215.74
H11	1	11418.1	1582.84	356.493	1573.51	1097.56
H12	1	21554.3	3485.45	1831.24	4431.5	3914.84
A1	2	43178.6	5298.05	3126.91	4146.32	1634.81
A2	2	241538	61585.8	41794.3	353976	1900.48
A3	2	207810	52114.5	39333.9	325499	980.863
A4	2	270019	66021.9	51418.3	394205	1653.57
A5	2	257229	64890.9	50834.4	373831	1612.86
A6	2	195958	49122	43077	320497	1249.05
A7	2	263883	64969.5	54427.9	392206	2248.18
A8	2	237969	56621.1	53014.8	390150	2262.38
A9	2	246169	59813.6	51922.7	388489	2431.09
A10	2	392555	95359.6	70178.4	515981	3960.34
A11	2	0	0	0	0	0
A12	2	0	361.612	133.432	601.124	479.502
B1	2	0	0	0	27.3178	93.2505
B2	2	245853	65336.9	46970.1	376691	2181.83
B3	2	198111	52806.1	41852.1	322783	1235.79
B4	2	273612	67398.8	54220.2	388561	8773.69
B5	2	251697	63426	53261.4	366938	2232.1
B6	2	204904	50600.2	46663.4	318794	2126
B7	2	249723	60986.2	54933	376794	2670.83
B8	2	245274	55743.6	55806.7	381232	2590.23
B9	2	217443	53536.5	47900.6	340610	1615.62
B10	2	379593	89125	70143.6	483510	3558.54
B11	2	0	0	181.946	116.796	0
B12	2	0	0	0	0	0
C1	2	2785.87	847.708	518.881	794.765	549.479
C2	2	248318	66605.4	51042.6	388505	2269.77
C3	2	218211	57523.5	49298.9	356181	1934.7
C4	2	262803	66518.2	56712	387104	2665.56
C5	2	276550	69120	60301.8	397362	2744.28
C6	2	214404	53838.1	52457.9	348146	1907.81
C7	2	262957	65202.7	62532.2	410122	2876.19
C8	2	232790	52450.7	58474.2	383973	2261.43
C9	2	218731	48691.9	50395.8	339011	1706.8
C10	2	348852	76313.9	67703.6	448209	3546.19
C11	2	775.097	404.491	337.201	511.802	558.618
C12	2	0	0	0	560.144	470.111
D1	2	31378.8	6607.8	5284.6	7044.42	5108.38
D2	2	291801	77171.5	56428.7	407200	1709.91
D3	2	240195	63444.6	53654.5	367174	2127.34
D4	2	295110	74454.3	64331.1	414277	2514.83
D5	2	308368	77763.8	72967.7	456907	3249.63
D6	2	232832	60203.5	60421	378625	2438.29
D7	2	295740	77928.2	74769.5	457431	3267.43
D8	2	232708	57120.9	61881.7	391674	2032.95
D9	2	240019	59053.3	57137.9	363729	2623.09
D10	2	380716	90369.9	78071.9	503726	3136.75
D11	2	16871.7	4998.39	5004.1	7551.95	3309.96
D12	2	9775.85	1239.17	689.173	1382.25	159.142
E1	2	4516.05	1042.73	420.286	521.859	32.8039
E2	2	326096	99438.7	70903.5	511073	2474.24
E3	2	283519	77356.6	62081.2	411083	1966.41
E4	2	370378	95880	79062.5	483831	3037.34
E5	2	304658	72938.5	76790.1	470459	2866.16
E6	2	222790	53263.8	61557.8	375113	2525.75
E7	2	282457	67433.7	76585	459340	3159.04
E8	2	297082	75360	78393.1	479519	2623.75
E9	2	316092	88130.9	69916.4	426397	2409.05
E10	2	408969	100580	85575.4	543653	3539.53
E11	2	18579.7	2974.29	2181.71	2860.6	1132.19
E12	2	6394.47	1307.71	1060.66	2533.65	2766.46
F1	2	46740.1	8333.78	6131.48	7153.78	3916.66
F2	2	310679	88420.4	66197.6	475218	2388.6
F3	2	277170	75293.9	66395.8	439306	2082.81
F4	2	353709	90070.2	81948.8	514899	3574.02
F5	2	370969	86851.8	93201.2	581609	2669.83
F6	2	240317	59006.2	66029.6	407634	2211.55
F7	2	305310	74887.8	83607.6	506966	3082.16
F8	2	350698	90374.4	109744	702332	4642.18
F9	2	307856	78080.8	91473.7	607550	2722.11
F10	2	455271	113396	119998	826660	4250.69
F11	2	18827.5	3153.48	2257.26	2376.11	0
F12	2	0	0	0	0	199.398
G1	2	15915.2	4487.5	5027.64	10680.2	14218.5
G2	2	338081	94668.1	68954.6	505072	2223.12
G3	2	321529	86022	73123.2	508913	2041.83
G4	2	381131	97856.5	83771.1	539760	2831.06
G5	2	377170	91960.5	88350.7	557458	3463.66
G6	2	264999	66421	67600.6	424761	2391.51
G7	2	309272	77115.6	79407.8	498174	4880.58
G8	2	296339	74715	75471	476965	2890.89
G9	2	293842	73625.4	70355.1	453917	2815.21
G10	2	409707	98271.1	84363.1	560185	3008.44
G11	2	11455.6	3135.3	2561.62	4048.57	3218.93
G12	2	87382.1	17349.4	14095.9	19095.7	11062.7
H1	2	29978.7	5338.72	3661.88	6283.26	6709
H2	2	348438	99844.4	66396.7	501728	1993.1
H3	2	317632	90002.8	68268.9	491654	2707.79
H4	2	398625	106067	84324.5	569508	3392.83
H5	2	392038	91285.9	91501.2	592467	3940.51
H6	2	274137	64189.9	64051.7	417579	2363.16
H7	2	328269	76405.9	77350.2	501663	3017.32
H8	2	352846	87757.8	79966.5	523465	3623.46
H9	2	298164	74151.2	67309.6	461140	2927.16
H10	2	459988	110001	92008.2	636400	4247.85
H11	2	11418.1	1545.7	368.555	1951.84	1271.62
H12	2	21102.9	3821.97	2089.66	4462.7	3495.01
A1	3	43339.3	5598.41	3082.03	4138.75	1955.36
A2	3	241538	61577.7	41834.8	352273	2114.95
A3	3	207603	52237.9	39304.5	324483	1568.4
A4	3	270362	66070.8	51477.6	393355	2067.19
A5	3	257925	65066.1	50925.8	372881	1695.49
A6	3	196000	49022.5	43112.1	319326	1365.45
A7	3	262934	65043	54295.2	390111	2368.03
A8	3	237672	56559.3	52853.2	388803	2537.19
A9	3	245602	59945.9	51812.7	387096	2151.54
A10	3	392735	95690.5	70124.6	514845	3737.92
A11	3	0	0	0	0	0
A12	3	0	156.08	0	749.289	241.824
B1	3	0	0	0	0	127.886
B2	3	247288	65663	46982.7	377078	1993.45
B3	3	198299	53155.1	41885.6	322663	1541.8
B4	3	274198	67864.4	54334.1	389171	9150.54
B5	3	252502	63979.9	53415.1	367483	2218.62
B6	3	205233	51182.7	46753.9	318521	2347.16
B7	3	249884	61257.3	54966.7	376065	2667
B8	3	244553	55915.8	55774.5	380499	2632.39
B9	3	217189	53764.5	47945.8	339651	1583.59
B10	3	380451	89100.8	70196.3	483351	3500.17
B11	3	0	103.243	150.259	160.468	16.4218
B12	3	0	0	0	0	0
C1	3	2343.52	842.523	661.39	829.536	582.669
C2	3	249459	66985.8	50976.4	389347	2192.07
C3	3	218878	57834.3	49156.2	356265	2007.74
C4	3	263823	67108.8	56672.1	387430	2808.16
C5	3	277729	69424.4	60464.5	397821	2738.01
C6	3	214758	54407.1	52643.3	347480	1977.67
C7	3	263612	65831.1	62669.1	409704	3068.21
C8	3	232708	52655.6	58532.1	383204	2490.71
C9	3	219347	49215.8	50543.2	339010	1989.47
C10	3	349702	76972.2	67655.4	449246	3758.32
C11	3	1324.04	262.969	407.661	777.332	819.034
C12	3	0	0	0	356.556	219.678
D1	3	31112.5	6374.59	5271.47	7179.41	4856.97
D2	3	292914	77550.3	56472.4	408744	1770.29
D3	3	240878	63620.6	53666.6	367051	2088.68
D4	3	295798	74858.6	64683.4	414198	2641.16
D5	3	308794	78295.5	73168.1	457106	2979.25
D6	3	233882	60337.2	60446.6	378047	2013.19
D7	3	295697	78088.4	74761.8	455892	3367.63
D8	3	233723	57789.1	61986	391237	2219.44
D9	3	241330	59346.6	57199.9	363550	2563.23
D10	3	382083	90936.5	78374.6	504589	3314.79
D11	3	17011.6	5160.36	4987.68	7163.98	3633.54
D12	3	9816.28	1090.98	848.291	1068.28	206.588
E1	3	4517.47	869.17	623.779	1061.53	400.481
E2	3	326903	100052	71412.4	512211	2478.8
E3	3	284194	77646.7	62335.9	411644	2143.89
E4	3	370984	96334.9	79200.6	484816	3258.38
E5	3	305945	73658.3	77041.4	470685	2693.25
E6	3	223062	53655.4	61544.2	374258	2289.39
E7	3	282494	67425.2	76401.2	459470	2599.84
E8	3	296757	75870.1	78454.6	478493	2920.81
E9	3	317697	89334.7	70063.1	426808	2295.21
E10	3	410374	101001	85953.3	546552	3967.62
E11	3	18270.3	2682.97	2082.42	2655.26	1308.03
E12	3	6576.1	1525.8	1125.3	2527.21	2659.24
F1	3	47039.6	8434.09	6030.17	7087.46	3793.56
F2	3	313314	89377.7	66526.5	475824	2474.04
F3	3	278462	76029.8	66522.4	439703	1850.23
F4	3	354792	90712.9	82464.6	515621	3457.84
F5	3	371352	87179.1	93437.5	581387	3011.73
F6	3	240719	59494.1	66028.7	406391	2209.79
F7	3	305808	75572.5	83683.1	506215	2997.05
F8	3	350537	90378.3	110010	701340	4812.2
F9	3	308321	78325.8	91691.1	606532	3094.19
F10	3	456573	113997	120279	828548	4003.41
F11	3	19026.2	3208.34	2184.58	2406.44	222.691
F12	3	0	0	0	0	485.603
G1	3	16385.9	4696.65	5221.31	11143.7	14492.4
G2	3	339417	95232.6	69084.3	505518	2621.86
G3	3	322630	86699.4	73457.1	508998	1761.51
G4	3	382079	98311.8	84192.8	540286	2983.08
G5	3	377858	92298.9	88788.3	557492	2955.15
G6	3	265660	66945.6	67794.1	424396	2552.61
G7	3	309202	77533.1	79292.5	497250	5125.31
G8	3	294825	74472.8	75113.9	473534	2715.98
G9	3	293487	73503	70194.6	452175	2926.8
G10	3	409720	98605	84591.2	560970	2830.57
G11	3	11786	3140.4	2819.87	4064.35	3205.63
G12	3	87405.9	16957.5	14097.2	19276.8	11031.9
H1	3	29926.7	5270	3878.69	6445.61	6156.85
H2	3	349079	100092	66210.4	500322	2161.38
H3	3	317171	89925.7	68304.9	490061	2484.42
H4	3	398236	106188	84217.7	568210	3184.95
H5	3	391864	91568.4	91499.2	590022	3721.65
H6	3	274187	64334.8	64023.3	415618	2316.68
H7	3	326724	76467.6	77008.9	499119	2968.03
H8	3	352149	87677	79831.2	521334	3271.87
H9	3	297550	74398.9	67361.7	458984	3442.14
H10	3	459224	109843	91849.3	634322	4593.6
H11	3	11463.5	1727.13	352.473	1537.41	1239.73
H12	3	21368.8	3460.98	1892.59	4356.27	4347.06
A1	4	42771	5220.91	3254.08	4328.04	1719.32
A2	4	242316	61807	41905.9	351329	2091.59
A3	4	208585	52477.3	39330.9	324312	1602.73
A4	4	271225	66331.9	51540.4	393172	1741.15
A5	4	258971	65858.6	51107.1	372594	1780.54
A6	4	196600	49369	43179	319392	1078.87
A7	4	264259	65496.4	54403	389429	2149.24
A8	4	237580	56943.4	52737.3	387428	2376.96
A9	4	245600	60363.8	51910.3	386234	1823.8
A10	4	394207	96552.6	70226.3	514731	3595
A11	4	0	0	0	0	0
A12	4	0	129.809	0	663.212	518.194
B1	4	0	0	0	0	195.826
B2	4	247716	66387.5	47061.8	377622	2076.56
B3	4	199378	53308.4	42037.1	322676	1578.09
B4	4	275574	68564.3	54597.4	389609	9293.7
B5	4	253831	64498.3	53494.5	367594	2451.18
B6	4	205775	51625.3	46913.2	319077	2255.14
B7	4	250982	61606.3	55243.4	376301	2746.53
B8	4	245790	56064.5	55914.2	380419	2474.88
B9	4	217799	54127.6	48093	340025	1485.85
B10	4	382137	89873.2	70460.7	483729	3516.33
B11	4	0	69.8716	225.9	145.234	100.583
B12	4	0	92.0377	0	0	0
C1	4	2355.62	518.476	621.195	1038.16	826.063
C2	4	251171	67236.4	51245.2	390424	2122.66
C3	4	220037	58418.8	49221.9	356509	2073.3
C4	4	265506	67882.4	57030.8	387541	2711.47
C5	4	279561	69944.3	60516.4	398208	2541.99
C6	4	215582	54810.8	52628.9	347499	2135.85
C7	4	264418	66327.4	62884.8	409265	3015.69
C8	4	233574	53336.4	58568	383409	2443.7
C9	4	220026	49677.8	50813.5	339371	1881.2
C10	4	351531	77460.2	67975.5	449704	3455.77
C11	4	984.805	463.709	380.483	652.675	646.445
C12	4	0	0	0	213.493	0
D1	4	31340	6330.16	5263.11	7363.5	4429.32
D2	4	294491	78582.8	57081.5	409130	1731.04
D3	4	241771	64079.4	54087.7	367071	2144.64
D4	4	297620	75503.6	64830.5	414326	2598.72
D5	4	310460	78937.5	73314.5	457652	3048.87
D6	4	234432	60993.2	60631.1	377333	2158.09
D7	4	297334	78781.8	74678.2	456371	3591.62
D8	4	233737	57514.6	62049.4	391503	1965.22
D9	4	241516	59668	57150.4	363806	2806.9
D10	4	383081	91443	78501.2	505433	3231.94
D11	4	16969.9	5112.26	4928.74	7581.57	3478.49
D12	4	9947.39	1111.38	788.495	967.578	399.338
E1	4	4651.83	1169.83	489.447	662.94	504.36
E2	4	328476	100175	71565.3	513688	2359.24
E3	4	285606	78674.1	62695.5	412358	2113.4
E4	4	372087	97109.3	79401.6	484130	3396.38
E5	4	307358	73886.2	77437.7	471770	2952.61
E6	4	224454	53896.8	61797.2	373951	2702.53
E7	4	284114	68029.8	76825.9	459628	3007.77
E8	4	298194	75991.8	78683.6	478605	3037.81
E9	4	320583	90617.6	70330.2	427115	2465.06
E10	4	412233	101643	86237.2	546926	3789.92
E11	4	18644.9	3030.67	2012.28	2696.86	1418.38
E12	4	6325.58	1387.17	1102.1	2328.22	2701.48
F1	4	46796.9	8128.39	6021.1	7236.31	3998.22
F2	4	314294	89615.8	66722.2	477271	2145.18
F3	4	279794	76829.8	66958.7	440223	2198.58
F4	4	356952	91622.7	82916.6	516694	3374.55
F5	4	373411	87563.2	93683.2	582262	3068.53
F6	4	241748	59819.1	66157.3	407050	2304.76
F7	4	307043	75763.6	83921.9	506567	3410.17
F8	4	352259	91197.5	110080	702050	4858.76
F9	4	309447	79022.8	91696.5	607280	2754.46
F10	4	458777	114675	120699	830639	4529.95
F11	4	18672.6	3056.68	2122.29	2649.11	0
F12	4	0	0	0	0	423.721
G1	4	15619.5	4790.51	5069.47	10798	13988.2
G2	4	340946	96397.3	69483.6	506534	2142.15
G3	4	324457	87763.6	73549.1	510368	2187.05
G4	4	383562	99351.3	84226.3	540954	3327.58
G5	4	379080	93026.6	88855	557920	3222.84
G6	4	267000	67503.1	67846.2	424738	2797.97
G7	4	309902	77633.9	79277.7	498276	5087.94
G8	4	295970	75079.2	75062.7	473967	2645.05
G9	4	294739	73892.4	70438	452746	2961.3
G10	4	411300	99326.3	84857.3	561675	2890.59
G11	4	11743.1	2933.84	2706.04	4118.96	2753.56
G12	4	86877.2	17133.4	13986.3	19038.3	11350.2
H1	4	30130.6	5554.4	3909.42	6298.81	6350.53
H2	4	349142	100416	66182.5	498449	2267.85
H3	4	317507	90036.9	68222	488085	2558.09
H4	4	398581	106604	84241.1	566809	3523.58
H5	4	392584	91756.7	91453.2	588714	3728.52
H6	4	274911	64575.1	63976.3	414150	2695.64
H7	4	327533	76670.9	76965.6	497112	2990.26
H8	4	352515	87984.6	79678.4	521098	3534.4
H9	4	297841	74649.8	67291.6	458637	3138.08
H10	4	459433	110163	91748.7	632379	4399.73
H11	4	11517.8	1324.28	487.833	1185.81	1300.86
H12	4	21623.5	3377.36	1998.56	4367.28	3911.3
A1	5	43375.7	5166.75	3204.71	3708.67	1381.28
A2	5	242526	62246.1	41917.9	350835	1912.16
A3	5	208464	52508.4	39258.8	324084	1341.82
A4	5	271739	66721.9	51599.6	392751	1801.85
A5	5	260036	66522.1	51230.4	372473	1723.03
A6	5	197453	49741.2	43167	318813	1506.73
A7	5	265054	66055.7	54282.4	389192	2448.47
A8	5	237978	57113.2	52916.2	386704	2317.18
A9	5	246301	61008.3	51894.9	385942	2136.12
A10	5	394904	97011	70545.3	514311	3735.91
A11	5	0	0	0	0	0
A12	5	0	242.62	0	1051.26	623.214
B1	5	0	0	0	13.6589	21.3144
B2	5	248970	67092.2	47251	378344	1974.62
B3	5	200081	53894.5	42119.5	322989	1149.48
B4	5	277164	69219.3	54827.8	389937	9307.49
B5	5	254984	65280.8	53713.2	368108	2292.77
B6	5	207240	52163.8	46885.2	319097	2406.08
B7	5	251427	61970.5	55210.5	376937	2454.44
B8	5	245840	56617.6	55910.3	380825	2528.97
B9	5	219142	54857.8	48318.3	341189	1505.56
B10	5	383167	90739.7	70597.4	484637	3651.92
B11	5	0	131.4	227.944	0	0
B12	5	0	160.476	0	0	0
C1	5	2616.46	808.823	868.455	846.921	644.132
C2	5	252182	68060.4	51434.1	391065	2060.5
C3	5	220824	58833.9	49281.1	357059	2082.66
C4	5	267080	68740.9	57079.4	388433	2861.89
C5	5	280455	70534.2	60742.6	398191	2614.49
C6	5	216104	55046.8	52739.6	347393	2292.43
C7	5	265836	66750.9	62899.9	410228	3078.06
C8	5	234299	53404.9	58650.3	383172	2302.67
C9	5	221171	50031	50683.2	339589	1682.83
C10	5	352764	77797.5	68063.3	450444	3613.13
C11	5	765.845	244.903	308.01	642.54	550.448
C12	5	0	21.994	0	52.823	113.134
D1	5	31193.9	6485.64	5369.35	7170.82	4832.32
D2	5	296371	79352.8	56987.1	410522	1515.67
D3	5	242564	64698.3	54063.6	367759	2130.39
D4	5	298630	76106.9	64843.1	414101	2756.64
D5	5	311280	80068.9	73394.1	458364	3392.9
D6	5	235375	61327.1	60583.6	377706	2195.51
D7	5	298758	79685.3	75003.7	457166	3482.57
D8	5	234638	57905.8	62321.4	391503	2023.75
D9	5	242807	60282.8	57473.9	364103	2731.02
D10	5	384587	92302.6	78764.1	506271	3446.11
D11	5	17119.9	5097.53	4924.87	7385.68	3547.83
D12	5	9567.16	1205.88	734.78	1094.94	279.734
E1	5	4525.95	1113.8	622.449	860.178	400.481
E2	5	329986	100991	71983.8	515864	2285.23
E3	5	287186	79158.2	62777.9	413327	2045.89
E4	5	373628	97899.5	79584.9	484568	3357.11
E5	5	308476	74580.3	77711	473006	3127.55
E6	5	225535	54392.5	61960.7	374479	2708.39
E7	5	285371	68725.1	77004.8	459642	2884.81
E8	5	299205	76780.4	78865.1	478693	3119.2
E9	5	322847	91968.9	70727.7	428476	2516.47
E10	5	413288	102543	86302.9	548807	3671.46
E11	5	18520.1	2589.93	1933.03	2728.72	1404.92
E12	5	6463.36	1211.46	1099.61	2692.36	2742.09
F1	5	46970.2	8418.17	6246.4	7149.36	3835.09
F2	5	315355	90550	66904.9	477556	2134.65
F3	5	281234	77370.8	67191.7	441189	2212.14
F4	5	358280	92255.5	83290.6	517579	3299.49
F5	5	374592	88302.9	93579.3	583068	2880.97
F6	5	243094	60420.2	66171.2	407673	2258.15
F7	5	308040	76315.7	84073.9	506611	3241.86
F8	5	353557	91779.2	110296	702059	5039.91
F9	5	310094	79367.6	92153.7	607042	3163.21
F10	5	460811	115260	120933	830833	4384.99
F11	5	18245.3	3133.05	2187.7	2240.62	0
F12	5	0	0	0	0	312.849
G1	5	15595.7	4744.4	5131.45	10922	14468.3
G2	5	343135	97420.2	69686.9	507771	2275.88
G3	5	325627	88644.5	73888.1	510447	2059.51
G4	5	384886	99545.7	84692.3	541665	3281.19
G5	5	379586	93533.3	89176.3	558240	3382.11
G6	5	267463	67732.6	68250.5	425063	2650.75
G7	5	310737	78626.3	79547.1	497825	5338.28
G8	5	296182	75613.6	75139.9	473873	3114.39
G9	5	294823	74628.9	70549	452472	3094.19
G10	5	412911	100033	84991.9	562568	3136.11
G11	5	11855	3061.35	2723.18	4067.99	2701.58
G12	5	86775.9	17160.6	13815.4	19028.3	11040.5
H1	5	30580.3	5298.63	3981.12	6630.41	6219.71
H2	5	350327	100969	66098.6	498191	2293.03
H3	5	318068	91044.5	68267.7	488438	3070.18
H4	5	399119	106955	84281.4	566476	3801.06
H5	5	392683	92378.6	91322.2	587666	3858.07
H6	5	275816	65232.4	64148.4	414044	2486.5
H7	5	327899	76823.1	76772.3	495329	3094.64
H8	5	352697	88689.9	79920.2	520634	3521.42
H9	5	298584	75108.5	67576.4	458054	3160.56
H10	5	459437	110792	91589.8	631223	4061.39
H11	5	11317	1437.13	530.719	1544.1	1828.37
H12	5	21599	3642.49	2043.18	4673.72	3936.1
A1	6	43664.7	5114.23	3275.03	4099.37	1790.71
A2	6	243863	62762	41929.9	350876	1868.63
A3	6	209502	52948	39475	323835	1417.35
A4	6	272398	67317.9	51771.2	392688	2003.89
A5	6	261299	66723.2	51337.4	372516	1805.66
A6	6	197321	50187.9	43347	318626	1279.56
A7	6	266338	66494.8	54448.8	389067	2263.46
A8	6	238710	57519.5	52840	386563	2454.17
A9	6	247209	61123.5	52021.2	385740	2190.1
A10	6	395960	97327.7	70560.3	515417	3179.34
A11	6	0	0	0	0	0
A12	6	255.32	174.625	56.7796	468.482	619.069
B1	6	0	0	0	269.08	0
B2	6	250164	67451	47528.4	378054	1984.59
B3	6	200931	54087.2	42169.3	323505	1302.49
B4	6	278224	69854.7	54910.6	390441	9439.44
B5	6	256666	65867.7	53947.1	368357	2296.98
B6	6	207547	52216.3	46932.5	319340	1979.1
B7	6	253286	62699.7	55486.5	376838	2667
B8	6	246718	56874.8	56229.7	380409	2832.07
B9	6	219606	55480.6	48452.3	341657	1433.28
B10	6	384569	91091.4	70720.7	485020	3339.44
B11	6	0	4.17144	86.8844	246.796	0
B12	6	0	0	0	123.623	0
C1	6	2588.22	546.992	537.151	681.759	370.007
C2	6	253443	68849.4	51572.7	391933	2236.62
C3	6	221623	59098.3	49443.4	356897	2011.49
C4	6	268073	69269.2	57281.5	388910	2779.84
C5	6	282060	71274.6	60940.2	398991	2850.79
C6	6	216724	55369.8	52855.2	347651	1990.52
C7	6	266556	67225.2	62918.2	410123	3005.85
C8	6	235132	53743.8	58744.1	383773	2641.64
C9	6	222133	50374.7	50857.4	339934	1947.32
C10	6	353886	78567.6	68233.6	451009	3348.84
C11	6	1276.75	484.787	364.378	687.133	550.448
C12	6	0	0	0	288.326	68.1002
D1	6	31239.2	6683.07	5210.59	7114.37	5039.37
D2	6	298210	80015.8	57271.4	411237	1741.11
D3	6	243619	65110.6	54206	367685	2402.03
D4	6	300094	76816.5	65262.1	414608	2282.89
D5	6	313468	80477.3	73956	458644	2899.55
D6	6	235990	61696.8	60652	377938	2367.28
D7	6	300137	80201	75372.8	456995	3081.76
D8	6	234912	58467.9	62464	392122	2168.43
D9	6	243414	60657.7	57789.1	364771	2978.07
D10	6	386486	92615.9	79157.9	507418	3170.24
D11	6	17128.8	5056.3	4871.73	7189.78	3276.25
D12	6	9927.73	1322.92	802.684	1382.25	536.734
E1	6	4299.65	1157.53	683.63	549.254	319.838
E2	6	331064	101604	72224.9	516434	2293.2
E3	6	287807	79966.2	62789.7	413435	2053.51
E4	6	375132	98336.4	79820.1	484658	2991.33
E5	6	309733	75117	77913.2	472808	3128.57
E6	6	225928	55031	62058.1	374362	2564.82
E7	6	286155	69137.9	77143.5	460446	2866.27
E8	6	300360	77333.7	78946.8	479352	3405.07
E9	6	325912	93398.3	70966.5	428609	2636.74
E10	6	414549	102935	86475.9	548338	3920.95
E11	6	18164.1	2634.1	2185.36	2845.55	1430.94
E12	6	6398.05	1123.16	1140.21	2487.73	3005.25
F1	6	47028.5	8257.36	6152.65	7277.58	3805.43
F2	6	316357	91271.6	67108.9	479058	2312.53
F3	6	282166	78124.5	67437.5	441227	2156.86
F4	6	359203	92881.4	83055.5	517252	3616.18
F5	6	375889	88796.4	94105.4	582622	2893.83
F6	6	243363	60781.5	66527.1	407538	2419.95
F7	6	309171	76902.6	84193.7	506902	3038.17
F8	6	354674	92464.5	110783	702367	5011.57
F9	6	311169	80043.4	92123.8	607630	2836.43
F10	6	461924	116020	121265	831272	4422.29
F11	6	18602.1	3047	2081.79	2613.72	0
F12	6	0	0	0	0	30.0816
G1	6	15352.7	4709.82	5080.32	10432.2	14999.6
G2	6	345028	98356.4	69663.2	507476	1985.11
G3	6	327206	89150	74121.3	511535	1742.57
G4	6	386121	100677	84785.9	541444	3209.13
G5	6	381639	94283.4	89159.2	558447	3316.86
G6	6	268280	68118.5	68266	425089	2626.68
G7	6	311687	78897.1	79851.6	497921	5085.14
G8	6	296921	75918.2	75509.6	474313	2916.16
G9	6	295539	75058.8	70508.6	452537	3193.61
G10	6	414178	100588	85077.7	563062	2877.49
G11	6	11808.1	3075.37	2680.34	4334.98	2726.96
G12	6	87318.1	17130.6	13992.8	19088.2	11088.6
H1	6	30382.4	5203.2	3929.91	6107.1	6603.66
H2	6	351265	101716	66144.1	497336	2315.93
H3	6	319062	91062.1	68397.5	487578	2509.37
H4	6	399782	107464	84318.9	564799	3707
H5	6	392737	92817.3	91387.2	586525	3863.96
H6	6	275965	65392.3	63925.7	413327	2706.37
H7	6	327816	77542.9	76733.9	494012	2957.4
H8	6	353803	88955.6	79921.1	520404	3520.49
H9	6	299360	75378.8	67531.8	458125	2947.5
H10	6	460929	110866	91843.1	631643	4384.92
H11	6	11443	1527.13	576.286	1276.72	1153.36
H12	6	20984.5	3220.32	1948.37	4497.56	3805.01
A1	7	43109.7	5211.06	3225.66	4140.26	1445.39
A2	7	243794	62665.7	42020.7	350794	1924.9
A3	7	209569	53347.1	39443.6	324509	1336.92
A4	7	273375	67944.2	51759.7	392601	1915.44
A5	7	262386	67506	51381.5	372782	1775.68
A6	7	198311	50342.5	43312.8	318369	1398.36
A7	7	267008	66960	54628.1	389157	2330.23
A8	7	239377	57603.6	53090.1	386645	2433.41
A9	7	247759	61510	52001.1	385177	2332.76
A10	7	397484	97681.9	70741.7	515582	3586.95
A11	7	0	0	0	0	0
A12	7	62.5618	0	0	640.635	113.312
B1	7	0	0	0	45.0744	81.2611
B2	7	250572	67936	47425.3	378212	1983.48
B3	7	201297	54574.5	42407.2	323140	1515.32
B4	7	278794	70288.8	54990.9	390140	9091.04
B5	7	257775	66377	54009.6	368721	2379.56
B6	7	208387	52830.4	47022.1	319547	2198.64
B7	7	254073	63029.1	55609.2	376656	2657.06
B8	7	246798	57160.1	56223.4	380567	2318.16
B9	7	220508	56069.3	48681.7	342431	1545.81
B10	7	385501	91618.9	71054.8	485114	3561.23
B11	7	0	155.386	84.8401	222.421	0
B12	7	0	0	0	0	0
C1	7	2347.55	850.301	609.015	639.537	555.625
C2	7	254918	69336.5	51828.8	392359	2156.85
C3	7	222061	59788.9	49618.9	356632	1846.68
C4	7	269307	69289	57393.3	388671	2754.44
C5	7	282865	71794.4	61054.6	399564	2600.17
C6	7	217264	55855.7	52860	347573	2235.42
C7	7	267652	67728.3	63227	410135	2980.41
C8	7	235508	54441.1	58932.4	383453	2169.89
C9	7	222234	50870	51039.8	339886	1791.93
C10	7	354101	78923.5	68576.1	451233	3526.19
C11	7	1269.56	300.106	207.353	762.129	466.707
C12	7	0	0	0	293.828	326.222
D1	7	30855.3	6547.34	5283.4	7200.28	4842.18
D2	7	299931	80714.8	57460.2	411444	1726.01
D3	7	244234	65426	54147.8	367380	2383.72
D4	7	301002	77064.5	65226.3	415098	2772.43
D5	7	314346	80960.2	73899	458724	3244.59
D6	7	236775	62250.6	60922.1	377766	2494.9
D7	7	301120	80853.6	75449.6	457004	3594.56
D8	7	235793	58792.7	62527.4	392320	2441.89
D9	7	244279	61025.2	57890.5	365336	2607.92
D10	7	387366	93213.3	79336.7	507120	2990.45
D11	7	16869.7	5106.37	4877.53	7263.36	3657.61
D12	7	9728.87	1249.9	750.996	1166.03	136.407
E1	7	4455.23	934.768	562.598	741.013	209.125
E2	7	332482	102040	72317.5	517025	2372.91
E3	7	288874	80708.8	63242.4	414484	2084
E4	7	376742	98978.6	80033.3	484166	3280.82
E5	7	310869	75854	77897.1	473335	2886.5
E6	7	226579	55409.7	62247.8	374596	2588.26
E7	7	286917	69491.2	77262.4	460155	3089.75
E8	7	301466	77854.6	79124.3	479262	3007.29
E9	7	328517	94634	71073.2	429145	2354.89
E10	7	415827	103492	86487.4	548107	4086.98
E11	7	18392.4	2880.31	2069.67	2424.25	1238.95
E12	7	6406.1	1187.62	1122.81	2893.76	2496.79
F1	7	46423.4	8480.27	6140.56	7159.67	3817.29
F2	7	317689	91580.1	67354.1	479427	1947.4
F3	7	283271	78814	67538.6	441647	2321.65
F4	7	361070	93531	83196.3	517141	3485.6
F5	7	376802	89410.4	94081.3	583078	3141.42
F6	7	244017	60860.8	66529.8	407010	2472.71
F7	7	309537	77628.5	84425	506922	3186.4
F8	7	356147	93120.5	110873	702702	5145.16
F9	7	312035	80459.3	92364.7	607726	3097.42
F10	7	462686	116880	121561	831580	3978.89
F11	7	18180.1	3070.67	2124.36	2500.47	0
F12	7	0	0	0	0	363.558
G1	7	15944.1	4467.74	5018.34	10914.3	14521
G2	7	346902	98662.9	70091.2	508725	2472.18
G3	7	328930	89675.8	74267.4	511826	1804.44
G4	7	387867	101463	84937.6	541733	3142
G5	7	382057	94816.5	89094.3	558327	2970.5
G6	7	268612	68555.1	68244.1	425517	2633.16
G7	7	312358	79313.6	79967	498063	5150.53
G8	7	298184	75999.6	75611	473961	3042.48
G9	7	296476	75305.6	70729.8	452570	3279.85
G10	7	415590	101309	85327.5	563102	2693.08
G11	7	11398.3	3134.02	2753.77	4395.66	2710.04
G12	7	87142.3	17523.9	14064.6	19219.4	10951.7
H1	7	29706.9	5176.48	3987.95	6202.09	6889.08
H2	7	352619	102166	66134.7	496173	2057.21
H3	7	320078	91916.7	68588.6	487628	2622.25
H4	7	401020	108226	84436.9	564880	3831.16
H5	7	393685	93217	91271.3	586271	3693.19
H6	7	276536	65773.9	64101.4	413221	2440.02
H7	7	328531	77802.1	76810.8	493461	2839.49
H8	7	354525	89098.7	80172.2	520318	3694.89
H9	7	299642	75929.1	67571.1	458077	2940
H10	7	460694	111234	92133.7	631047	4063.86
H11	7	10943.3	1521.42	470.41	1482.6	1237.08
H12	7	21668.2	3346.77	2076.65	4194.79	4123.87
A1	8	43817.8	5452.33	3082.03	4007	1508.05
A2	8	244768	63538.1	42097.2	350547	1900.48
A3	8	210375	53605.2	39670.9	323729	1327.11
A4	8	274617	68011.7	51788.9	392600	1877.29
A5	8	263097	68116.8	51406.8	372617	1859.12
A6	8	198373	50612.1	43449	318509	1273.14
A7	8	267216	67035.9	54598.3	389017	2441.23
A8	8	239448	58173.2	53135.7	386652	2525.57
A9	8	248133	61467.2	52067.2	385172	2106.24
A10	8	398308	98215.1	70865.3	514990	3486.31
A11	8	0	0	0	0	0
A12	8	0	0	149.046	728.122	526.485
B1	8	0	0	0	199.42	89.2541
B2	8	251379	68258.5	47538.8	379134	1806.19
B3	8	201952	54560.3	42450.9	323443	1158.31
B4	8	280008	70733.9	55229.1	390585	9418.74
B5	8	258501	66737.7	54081.3	368724	2578.41
B6	8	208862	52995.8	47165.5	319555	2079.19
B7	8	254270	63422.4	55586.7	377508	2596.66
B8	8	247145	57298.2	56274.4	380372	2566.36
B9	8	222000	56497.5	48737.6	343250	1668.19
B10	8	386509	91899.6	71039.6	485446	3733.63
B11	8	0	42.7573	75.6406	192.968	0
B12	8	0	117.997	0	0	250.781
C1	8	3204.01	707.72	735.69	884.176	559.313
C2	8	256036	69809.5	51778.4	393731	1880.25
C3	8	222872	60034.6	49652.6	357224	2172.56
C4	8	270474	70121.1	57481.7	388879	2674.35
C5	8	283987	72071.2	61246.8	399542	2781.87
C6	8	218016	55854.2	53148.2	347972	1927.89
C7	8	268722	67987.8	63395.7	410895	2947.58
C8	8	235973	54597.9	58956.9	383904	2202.88
C9	8	222585	50917.7	51034.9	340246	2020.88
C10	8	355411	79209.9	68627.7	452125	3482.72
C11	8	997.141	604.227	263.721	742.874	532.066
C12	8	0	17.3637	0	426.986	13.1807
D1	8	31120.2	6547.34	5220.14	7253.05	4627.74
D2	8	300517	81269.6	57658.2	412077	1843.76
D3	8	244998	65630.6	54336.3	368268	2029.67
D4	8	301841	77557.8	65492.4	415245	2581.94
D5	8	316194	81582.1	74093.6	458865	3212.31
D6	8	237552	62795.4	61080.9	378018	2378.79
D7	8	301905	81576.6	75554.5	457221	3636.81
D8	8	236666	58996.8	62519.1	392612	1986.12
D9	8	245222	61452.1	57898.9	365016	2859.18
D10	8	388403	93401.3	79431.4	508054	3317.43
D11	8	16964	5111.27	5055.32	7265.27	3408.19
D12	8	9465.54	1110.31	830.048	1476.05	375.615
E1	8	4568.38	953.901	553.288	887.572	356.743
E2	8	333981	102467	72622.2	517702	2783.95
E3	8	290201	80741.5	63195.3	413885	2295.23
E4	8	377077	99626	80012.3	485090	3564.69
E5	8	311678	76201.1	78078.3	473971	3257.74
E6	8	227255	55534.1	62290.7	375199	2452.5
E7	8	287904	70025.9	77398.1	460174	2948.24
E8	8	302289	78350	79292.8	479801	3068.33
E9	8	331139	96314.6	71395	429474	2377.84
E10	8	417131	104207	86796.2	548354	4097.75
E11	8	18400.8	2618.12	2068.76	2634.02	1609.47
E12	8	6270.11	1389.82	1077.24	2714.92	2749.4
F1	8	46447	8372	6240.35	6982.82	4090.17
F2	8	318556	91724.7	67256.2	479846	2160.39
F3	8	283646	79019.3	67608.9	442052	2198.58
F4	8	361544	94015	83425.4	517903	3535.98
F5	8	378072	90019.4	94336.5	584244	3104.98
F6	8	244669	61426.4	66600.6	407257	2236.17
F7	8	310244	77791.2	84326.8	507291	3326.97
F8	8	357086	93686.6	110886	703104	4912.39
F9	8	313651	80918.6	92307.9	608062	3040.26
F10	8	464196	117636	121721	832820	4454.27
F11	8	18680.1	2979.25	2067.26	2440.82	32.6886
F12	8	0	0	0	0	286.205
G1	8	16229.5	4467.74	5117.5	10833.6	14472.8
G2	8	347646	99568.3	70220.9	508782	2608.37
G3	8	330046	90372.1	74442.6	511918	1598.62
G4	8	388561	101675	85113	542580	3172.6
G5	8	382868	95294	89353.6	558424	3067.4
G6	8	269240	68797	68302.5	425904	2921.11
G7	8	313131	79755.4	80046.3	498062	5342.95
G8	8	298480	76708.1	75681.4	473953	3164.92
G9	8	297517	75795.2	70987.4	452625	2887.24
G10	8	416103	101839	85507.8	563920	3035.72
G11	8	11771.7	2930.02	2772.13	3814.34	2902.23
G12	8	86860.8	17229.3	13878	19035.8	11096
H1	8	30058.6	5270	4151.84	6279.81	6491.54
H2	8	353728	102327	66321	495407	2471.62
H3	8	320433	91888.9	68550.1	487024	2815.92
H4	8	402018	108391	84432.2	565712	3757.79
H5	8	394172	93384.2	91315.2	585792	3655.89
H6	8	276780	66103.5	63894.7	412109	2443.6
H7	8	328837	78293.5	76767.5	493226	3036.65
H8	8	354872	89706.5	80175.9	519760	3508.43
H9	8	300215	75921.5	67651.9	457499	2973.2
H10	8	461656	112022	91845.6	630629	4438.02
H11	8	11431.3	1861.41	388.658	1554.79	1593.18
H12	8	20991.2	2934.8	1849.83	4163.59	4168.15
A1	9	43364.2	5298.05	3016.2	4094.83	1050.53
A2	9	245639	63754.7	42121.2	350264	1692.38
A3	9	211090	53990.8	39634.3	323970	1587.04
A4	9	275576	68943.5	51977.2	392732	1689.99
A5	9	263586	68207.6	51481.9	372484	1642.83
A6	9	198977	51045.6	43425.1	318191	1460.17
A7	9	268643	67649.8	54683.6	389059	2193.48
A8	9	240154	58134.4	53242.5	386106	2326.31
A9	9	248532	62007.9	52173.4	385158	2395.42
A10	9	399275	98304.2	70946.1	514587	3809.38
A11	9	0	0	0	0	0
A12	9	138.651	47.9058	21.2923	553.147	461.538
B1	9	0	0	0	132.491	0
B2	9	252021	68479.4	47661.5	378908	2114.24
B3	9	202801	54967.9	42464.1	323166	1351.53
B4	9	280753	70948	55073.7	390837	9612.77
B5	9	259533	67267.6	54209.7	368505	2245.58
B6	9	209788	53539.6	47275.9	319460	2289.85
B7	9	255271	63828.8	55675.7	377166	2624.19
B8	9	247620	57575.1	56317.6	380386	2561.59
B9	9	223095	56727.1	48939.8	344017	1594.27
B10	9	387284	92589.5	71354	485822	3470.54
B11	9	0	0	100.173	137.109	0
B12	9	0	92.0377	0	0	0
C1	9	2603.01	718.089	619.977	768.687	874.004
C2	9	256763	70396.9	52064	393124	2285.31
C3	9	223425	60191.9	49725.8	356957	1973.1
C4	9	271366	70495.7	57690.7	389128	2871.65
C5	9	284472	72616.2	61382.7	399278	2629.71
C6	9	218577	56489.2	53069.5	347879	2215.34
C7	9	269046	68613.2	63451.4	410656	2666.94
C8	9	236501	54946.2	59059.6	383735	2269.68
C9	9	223646	51233.6	51179	340244	2010.96
C10	9	356467	79547.9	68603.6	451875	3332.32
C11	9	1476.18	562.072	237.551	909.083	742.441
C12	9	0	0	0	519.427	14.2791
D1	9	31080.2	6610.27	5175.97	7104.55	5181.09
D2	9	302134	81699.9	57778	412270	1793.44
D3	9	245514	66169.5	54265.1	367434	2042.9
D4	9	302846	78011.2	65446.9	415309	2966.87
D5	9	317489	82319.8	74137.8	459865	3031.71
D6	9	238458	62844.7	60998.2	377666	2438.29
D7	9	303417	82054.3	75539.9	457296	3211.43
D8	9	236892	59259.2	62754.3	392708	2345.71
D9	9	245570	61624.3	57847.7	365437	2963.73
D10	9	389087	93990.8	79561.5	508249	3398.52
D11	9	16936.2	5011.15	4744.19	7478.37	3386.04
D12	9	10088.3	1278.9	685.119	1242.05	156.177
E1	9	4230.35	1121.99	581.219	691.704	184.522
E2	9	334885	102787	72439.2	518049	2222.61
E3	9	290960	81321.6	63328	414900	2008.87
E4	9	378159	100396	80219.9	484392	3278.57
E5	9	312969	76628.2	78095.3	473852	3058.39
E6	9	227860	55736.8	62433.7	374865	2581.42
E7	9	288368	70233.8	77416.8	460651	2783.31
E8	9	303047	78827.7	79422.9	479878	2981.85
E9	9	333854	97725.8	71697.6	429797	2614.71
E10	9	417764	104639	86996.7	549380	3780.05
E11	9	17959.1	2788.22	2063.29	2765.01	1364.55
E12	9	6326.47	1150.53	1080.55	2602.13	2751.02
F1	9	46417	8322.64	6167.77	7317.37	3965.6
F2	9	319494	92522.8	67375.3	480244	2094.85
F3	9	284859	79759.3	67740.8	442244	2332.08
F4	9	362512	94195.4	83462.9	517824	3381.75
F5	9	378766	89944.4	94666.2	584255	3046.03
F6	9	245572	61640.8	66810.4	407416	2249.36
F7	9	311097	78413.7	84644	507064	3456.08
F8	9	357789	94316.2	111243	702978	4922.51
F9	9	314520	81504.2	92743.8	608658	3085.56
F10	9	466578	118209	122205	834295	4106.8
F11	9	18479.2	2906.11	2039.22	2241.63	0
F12	9	0	0	0	0	357.542
G1	9	15746.9	4449.63	5174.83	10694.1	14387.1
G2	9	348904	100460	70409.3	509200	2387.53
G3	9	330380	91018	74382.1	512328	1839.8
G4	9	389281	102249	85279.5	542244	3160.76
G5	9	383991	95552.5	89556.7	558558	3184.46
G6	9	270089	69477.2	68550.8	425921	2565.57
G7	9	314013	80244.9	80034.3	497959	5212.18
G8	9	299321	77239.7	75688.2	473973	3112.45
G9	9	297969	76143.2	70966.2	453000	2938.98
G10	9	417007	101969	85663.1	563732	2834.94
G11	9	11797.7	2931.29	2806.4	4146.87	3148.82
G12	9	86920.4	16890.3	14007.2	19166.9	11084.9
H1	9	29904.8	5852.17	4073.31	6126.09	6897.57
H2	9	355021	102834	66302.4	495061	1795.05
H3	9	321092	92906.5	68575.3	487447	2560.46
H4	9	402902	109027	84541.8	562703	3554.62
H5	9	394834	93779.9	91441.2	585550	3447.82
H6	9	277382	66410.9	64127.1	412800	2946.8
H7	9	329340	78458.2	76768.5	492010	3167.12
H8	9	356119	90106	80189.8	519945	3134.58
H9	9	300960	76667.8	67826.2	457957	3023.52
H10	9	461938	112120	91959.8	630700	4053.98
H11	9	11957.4	1614.27	502.575	1661.74	1195.88
H12	9	21815.7	3679.2	1872.14	4036.98	3746.55
A1	10	43699.1	5242.25	3099.98	4100.89	1714.95
A2	10	246253	63846.5	42229.5	349906	1769.89
A3	10	211607	53959.7	39610	323932	1492.87
A4	10	276490	68902.6	52132.8	392953	1816.59
A5	10	265108	68497.2	51471.3	372537	2038.96
A6	10	199242	51134.1	43491.2	318327	1483.45
A7	10	268683	67816.8	54707.7	389060	2154.88
A8	10	240460	58455.1	53154.7	385810	2474.09
A9	10	249048	62010.8	52158.1	385049	2267.22
A10	10	399707	98946.7	70741.7	514953	3627.21
A11	10	0	0	0	0	0
A12	10	0	137.536	63.877	735.178	444.956
B1	10	0	0	0	127.028	58.6146
B2	10	253046	69289.2	48066.2	379130	2345.83
B3	10	202864	55255.4	42565.8	323110	1520.22
B4	10	281095	71749.9	55194.5	390888	9532.57
B5	10	259719	67426.9	54248.5	369162	2444.44
B6	10	209909	53677.1	47308.8	319462	2099.37
B7	10	255702	64175.6	55844	377372	2600.48
B8	10	248281	57925.6	56469	380382	2592.62
B9	10	223244	57585.1	49071.4	345106	1650.12
B10	10	387740	92794.9	71275.4	485371	3484.01
B11	10	0	0	129.816	321.952	109.821
B12	10	0	70.7982	0	0	0
C1	10	2889.4	718.089	555.422	758.752	783.039
C2	10	256893	70862.3	52134.3	394010	1924.8
C3	10	223793	60610.7	49849.7	356934	2197.84
C4	10	271647	70851.3	57543.9	388990	2894.12
C5	10	285900	73126.5	61512.4	399055	2665.51
C6	10	219042	56858.7	53076	347737	2193.66
C7	10	269987	68884.8	63395.7	410950	2933.63
C8	10	237295	55352.8	59121.5	383380	2235.87
C9	10	223964	51348.7	51142.4	340722	1920.87
C10	10	356834	79841.9	68820.4	452332	3471.42
C11	10	1396	377.391	323.109	468.223	739.378
C12	10	0	0	0	495.216	136.2
D1	10	31248.2	6470.83	5143.74	7194.14	4750.98
D2	10	302992	82268.2	57811.5	412854	1735.07
D3	10	245590	66443.3	54680.2	367866	2233.15
D4	10	303449	78589.9	65471.1	415245	2341.12
D5	10	318299	82944.4	74312.7	459991	3491.77
D6	10	238935	63447.8	61076.2	378094	2291.47
D7	10	304479	82684.8	75738.1	457246	3598.49
D8	10	237588	59504.7	62787.7	392691	2125.78
D9	10	246351	62059.4	58137.7	365916	2562.38
D10	10	389485	94532.6	79693.4	508810	3352.69
D11	10	16877.6	4953.23	4748.05	7330.25	3226.17
D12	10	9889.49	1130.71	760.117	1103.83	247.115
E1	10	4250.15	1015.4	517.378	668.418	403.215
E2	10	335639	103350	72890.1	518519	2481.07
E3	10	291534	81653.9	63489.6	414708	1896.72
E4	10	378767	100480	80274	484061	3385.16
E5	10	313535	76778.8	78356.6	473817	2930.24
E6	10	228364	56251.8	62470.7	375176	2726.95
E7	10	289046	70777.9	77608.5	460707	2950.19
E8	10	303909	78859.1	79458.2	479924	3120.21
E9	10	335767	98890.5	71693.1	430152	2439.35
E10	10	418212	104965	87015.3	548855	3817.74
E11	10	18221	2817.35	2042.34	2719.87	1229.08
E12	10	6391.79	1323.6	1073.09	2494.98	2666.55
F1	10	46927.7	8351.3	6282.69	7161.15	4125.76
F2	10	320181	92769.4	67563.9	480557	2131.13
F3	10	285167	80234	67698.2	441867	2375.89
F4	10	363478	94719.8	83555.1	517494	3675.82
F5	10	380053	90654.8	94323.9	584189	2760.93
F6	10	245834	61942.2	66838.4	408162	2060.3
F7	10	311388	78296.7	84680.8	507141	3236.13
F8	10	359210	95003.4	111310	704104	4729.22
F9	10	315201	81797	92905.5	608934	3063.99
F10	10	468070	119227	122456	835790	4139.84
F11	10	18485.7	3019.04	2101.52	2568.22	0
F12	10	0	0	0	0	260.421
G1	10	15543	4808.63	5153.14	10503.5	14998.1
G2	10	350374	100727	70652.6	509563	2229.26
G3	10	331437	91551.3	74646.8	512066	2241.35
G4	10	390113	102951	85292.3	542442	3372.99
G5	10	384396	96232.2	89564.3	558796	3367.72
G6	10	270368	69616	68450.4	426247	2952.59
G7	10	314322	80226	80199.5	498135	5320.53
G8	10	299302	77405.2	75780.8	474143	3284.44
G9	10	298662	76672.2	71030.8	453045	2880.14
G10	10	418192	102639	85830.3	564141	3030.26
G11	10	11302	2782.12	2867.6	4126.24	3070.25
G12	10	86539	17119.1	13934.1	18973.4	11092.3
H1	10	29828.8	5422.7	3962.34	5797.94	6605.36
H2	10	355132	103179	66325.7	494340	2273.57
H3	10	321729	92470.4	68560.9	487247	2830.17
H4	10	403856	109414	84634.5	563676	3559.32
H5	10	395785	94133.4	91561.1	584253	3729.5
H6	10	277966	66611.4	64275.2	412435	2662.57
H7	10	329790	78696.2	76792.5	492796	3283.1
H8	10	356474	90186.9	80307.4	519822	3548.32
H9	10	301519	76989.8	67654	457804	3109.17
H10	10	462649	112478	92170.9	630746	4467.65
H11	10	11190.9	1258.56	503.915	1183.14	1316.8
H12	10	21317.4	3701.64	1859.13	4493.89	4138.04
A1	11	43050.4	5557.37	3073.05	3796.5	2063.18
A2	11	247009	64373.8	42231.7	349994	1803.86
A3	11	211828	54309	39801.8	323952	1327.11
A4	11	277051	69378.8	52147.9	392843	1827
A5	11	265004	68790	51788.1	372506	1810.52
A6	11	199650	51298.8	43459.4	318279	1243.43
A7	11	268926	68009.8	54739	388693	2325.4
A8	11	241153	58777.3	53298.9	386047	2366.16
A9	11	249654	62581	52069.1	384876	2160.22
A10	11	399659	98899.2	70709.8	514641	3378.62
A11	11	0	0	0	0	0
A12	11	0	224.076	0	853.709	598.341
B1	11	0	0	0	117.467	333.038
B2	11	253338	69593.1	47968.7	379444	1817.27
B3	11	203284	55228.1	42517	323325	1281.89
B4	11	282108	71538.4	55290.3	390831	9380.8
B5	11	260980	67729.8	54353.2	369059	2254.01
B6	11	210390	53721.9	47332.8	319272	2143.76
B7	11	256424	64477.3	55882.9	377098	2617.3
B8	11	248507	57893.7	56516.9	380400	2453.4
B9	11	224564	57793.6	49146.2	346616	1364.29
B10	11	388618	93191.4	71432.6	486029	3677.06
B11	11	0	0	109.372	49.7654	0
B12	11	0	0	0	25.6156	0
C1	11	2611.08	838.635	588.308	745.092	314.691
C2	11	258625	71092.2	52293.8	394006	2341.25
C3	11	224583	60806.2	49950.1	356916	2149.15
C4	11	272699	71300.4	57806.3	389320	2707.56
C5	11	286174	73277	61555.3	399485	2660.14
C6	11	219496	57169.3	53219.6	347805	1943.14
C7	11	270604	69085.2	63538.1	411418	2876.19
C8	11	237618	55278	58954.4	383930	2184.73
C9	11	223894	51588.4	51197	340499	1992.78
C10	11	357365	79936.8	68872.9	452959	3330.58
C11	11	1086.57	427.576	315.056	742.874	680.146
C12	11	0	15.0485	0	398.374	116.429
D1	11	30965.1	6457.26	5377.71	7283.73	5009.79
D2	11	303552	82868.3	57932.3	413769	1690.79
D3	11	246624	66553.1	54609	368419	2141.58
D4	11	304248	78605.4	65610.5	415225	2812.9
D5	11	319779	83086	74359.8	459584	3181.03
D6	11	239805	63716.2	61184.6	378074	2536.16
D7	11	304924	82851.4	75939.2	457410	3415.77
D8	11	237899	59772.8	62829.4	392919	2050.51
D9	11	246443	62215.2	58193.9	365703	2829.67
D10	11	390710	94876.8	79758.9	509139	3360.62
D11	11	16955.1	5016.06	4994.44	7279.61	3321.51
D12	11	9931	1417.42	731.74	1185.78	536.734
E1	11	4681.53	926.568	504.078	794.432	172.221
E2	11	336434	103683	72928	519182	2101.91
E3	11	292322	82119.1	63527.1	415125	2076.38
E4	11	379555	100979	80446.3	484725	3212.37
E5	11	313993	77114.4	78422.6	474043	3159.08
E6	11	228557	56524.5	62416.2	375188	2672.25
E7	11	289778	70779.8	77626.2	460835	2744.28
E8	11	304315	79213.2	79604.4	479721	3027.63
E9	11	337506	100140	71902.7	430370	2631.23
E10	11	418750	105331	87217.6	549885	3602.36
E11	11	18125	2843.66	2081.51	2623.4	1487.46
E12	11	6218.21	1209.69	1076.41	2560.24	2734.78
F1	11	47006.5	8308.31	6031.69	7429.38	3931.49
F2	11	320683	92810.7	67680.6	481073	2318.38
F3	11	286078	80321.4	68029.2	442019	2179.81
F4	11	364127	94972.1	83487.2	517933	3522.61
F5	11	380011	90575.7	94569.6	584421	3389
F6	11	246283	62039.3	66934.6	407361	1981.16
F7	11	311957	78659.6	84714.8	506858	3241.86
F8	11	360222	95279.1	111350	704072	5111.76
F9	11	316090	82141.8	93069.4	609041	3334.69
F10	11	468708	119314	122501	834329	3977.83
F11	11	18137.4	2938.38	2039.22	2651.13	0
F12	11	0	0	0	0	213.15
G1	11	16134.4	4324.47	5216.66	10866.2	14552.6
G2	11	351550	101188	70657.6	510123	2316.37
G3	11	332777	91988.6	74839.6	513337	1757.72
G4	11	391350	103376	85347.4	542136	3124.23
G5	11	385436	96292.4	89681.6	558400	3234.35
G6	11	270747	69835.6	68388.3	425705	2735.01
G7	11	314324	80618.2	80114.6	497607	5140.25
G8	11	300351	77462.9	75694	473928	2848.14
G9	11	298843	76504.3	71006.6	452511	2736.08
G10	11	418678	102974	85933.5	564528	2655.98
G11	11	11708	2986.12	2970.41	4092.26	2959.04
G12	11	86345.4	17174.9	13828.4	18933.4	11119.5
H1	11	29950.7	5592.58	3813.82	6098.46	6663.12
H2	11	355978	103588	66317.5	494241	2239.23
H3	11	322247	93366.6	68780.8	487158	2729.18
H4	11	404150	109737	84743.2	564727	3671.26
H5	11	395491	94496	91547.1	584512	3644.11
H6	11	278021	66863.2	64355.1	412068	2949.48
H7	11	330031	78939	76881.9	491790	2943.87
H8	11	357365	90488	80260.2	519958	3561.31
H9	11	301759	77059.8	67719.9	457703	3049.21
H10	11	463510	112708	92183.3	631119	3940.37
H11	11	11422.5	1685.7	497.214	1762.01	1388.55
H12	11	21447	3489.53	1909.33	4071.84	4053.01
A1	12	43923	5273.43	3310.94	4069.09	1773.23
A2	12	247017	64333.7	42214.2	350086	2026.82
A3	12	212204	54613.8	39776.4	323469	1470.31
A4	12	277410	69348.6	52079.8	392823	2136.55
A5	12	265422	68921.4	51626.4	372300	1820.24
A6	12	199996	51339.2	43489.6	318352	1397.56
A7	12	269657	68183.9	54736.6	388916	2214.4
A8	12	241092	58912.5	53271.5	385707	2320.5
A9	12	249950	62479.2	52309.2	384531	2288.42
A10	12	400846	99233.1	70983	514641	3380.63
A11	12	0	0	0	0	0
A12	12	0	0	32.6483	699.901	229.387
B1	12	0	0	0	39.6108	134.547
B2	12	254150	69283.4	47875.9	378829	1915.89
B3	12	203626	55582.2	42778.3	323294	1596.72
B4	12	282192	72030.2	55538.9	390859	9306.63
B5	12	261499	67940.3	54395.5	369137	2528.7
B6	12	210086	53999.2	47476.1	319666	2341.51
B7	12	256891	64672.9	55756.5	377557	2920.86
B8	12	248621	57906.6	56720.9	380437	2744.56
B9	12	225329	58370	49502.2	346876	1577.02
B10	12	389103	93377.1	71484.5	485787	3528.01
B11	12	0	385.858	0	305.702	0
B12	12	0	96.7575	0	0	0
C1	12	2499.48	776.418	697.931	948.75	503.997
C2	12	258906	71658.9	52375.7	394220	2042.89
C3	12	225399	61266.9	49990.5	356437	1990.89
C4	12	272952	71426.8	57888	389266	2801.33
C5	12	286592	73539.1	61624.1	399643	2779.18
C6	12	219910	57340.8	53264.6	347680	2053.95
C7	12	270749	69479	63684.5	410995	2891.78
C8	12	237502	55515.1	59301.7	383937	2381.02
C9	12	224889	51825	51377.7	340292	1864.67
C10	12	357615	80330	68859.1	452552	3300.16
C11	12	1004.34	369.362	171.117	537.139	595.383
C12	12	0	0	0	203.589	115.331
D1	12	31486	6774.39	5251.17	7186.78	4964.19
D2	12	304560	83219.3	58080.6	413354	1645.5
D3	12	247091	66892.2	54706.2	368129	2042.9
D4	12	304559	79183.2	65788.5	415352	2575.04
D5	12	319785	83539.5	74522.9	459610	3458.48
D6	12	240349	63989.9	61285.4	378167	2269.4
D7	12	306460	83595.7	75938.2	457404	3553.3
D8	12	238212	59784.1	62951.2	393312	2216.93
D9	12	247082	62379.2	58201.4	365496	2607.07
D10	12	390768	95304	79703.2	509644	3435.53
D11	12	16856.8	5162.32	4932.6	7504.17	3407.22
D12	12	9733.24	1052.32	745.929	1212.43	93.9037
E1	12	4281.27	1000.37	682.3	864.287	392.28
E2	12	337178	103853	73079.8	519312	2368.35
E3	12	293240	82329	63758.2	414712	2103.6
E4	12	380253	101172	80276.2	484110	3194.42
E5	12	314323	77580.6	78522.7	475028	2902.77
E6	12	228813	56599.1	62571.9	374725	2802.16
E7	12	289891	71106.7	77628.1	460195	2896.52
E8	12	304521	79872.4	79734.5	479915	3034.75
E9	12	340158	101203	71947.4	430354	2532.08
E10	12	419297	105670	87355.1	548736	3831.21
E11	12	18294.6	2725.25	2080.6	2599.5	1441.71
E12	12	6512.57	1239.72	1081.38	2673.02	2867.17
F1	12	46908.8	8244.62	6133	7506.01	3614.12
F2	12	321015	92814.4	67710.1	480525	2229.44
F3	12	287192	80575.1	67841.9	442448	2379.01
F4	12	365078	95187	83666.6	517673	3209.01
F5	12	381376	91257.7	94747.1	584463	2953.85
F6	12	246490	62204.7	66923.2	408020	2382.14
F7	12	312502	78868.9	84598.7	506849	3305.94
F8	12	360868	95541.1	111621	703126	4879
F9	12	316366	82630.9	93010.5	608791	3116.84
F10	12	470241	119729	122696	835586	4386.06
F11	12	18600	3025.49	2000.8	2590.46	18.3874
F12	12	0	0	0	0	466.695
G1	12	15774.1	4719.7	5114.4	11083.2	14864.2
G2	12	351805	101612	70690	510302	1799.85
G3	12	333348	92408.2	75119.3	512596	1868.84
G4	12	391376	103679	85465.7	542332	3357.2
G5	12	385669	96579.1	89654	558910	3212.28
G6	12	270819	70033.9	68608.3	426198	2797.97
G7	12	315108	80827	80165.4	498442	5087.01
G8	12	300635	77865.9	75884.1	473832	2719.87
G9	12	298970	77007	71117.6	452561	2926.8
G10	12	419086	102963	86080.1	564232	3166.66
G11	12	11294.2	3070.27	2737.86	4372.6	2876.85
G12	12	87009.7	16979	13881.9	18890.9	11215.7
H1	12	30302.5	5296.73	4075.01	6165.82	6603.66
H2	12	355492	103858	66322.2	494056	2341.12
H3	12	323424	93549.9	68941.9	487504	2319.27
H4	12	404592	110116	84892.2	564223	3428.57
H5	12	396262	94777.5	91553.1	584261	3683.37
H6	12	278876	67085.8	64387.9	411739	2663.47
H7	12	330298	78875.4	76761.8	491396	3026.98
H8	12	357143	90998.1	80477	519869	3408.24
H9	12	302036	77535.7	67919.7	457840	2690.54
H10	12	463241	113222	92025.6	630541	4783.77
H11	12	11223.2	1565.7	533.4	1446.5	1166.65
H12	12	21377.7	3232.56	2078.51	4033.31	4462.21
A1	13	43368	5296.41	3129.9	4281.1	1427.91
A2	13	247834	64786.5	42308.2	349826	1670.09
A3	13	212145	54763.1	39800.8	323770	1601.75
A4	13	278281	69703	52219.5	393090	1887.69
A5	13	266021	68990.4	51758.7	372213	1608
A6	13	200128	51565.3	43676	318115	1234.6
A7	13	270190	68627.7	54826.7	388882	2170.16
A8	13	241828	59198.5	53319.6	385484	2433.41
A9	13	249923	62822.8	52185.8	384192	2192.99
A10	13	400648	99147.1	71028.8	514219	3657.4
A11	13	0	0	0	0	0
A12	13	0	426.517	0	644.868	753.108
B1	13	0	0	0	0	101.243
B2	13	254548	70051.2	48053.6	379993	2216.18
B3	13	204284	55811.2	42574	323833	1344.66
B4	13	283286	72174.6	55371.5	390676	9248.85
B5	13	261533	68226.7	54354.1	368667	2370.29
B6	13	210822	54345.3	47416.1	319264	2258.37
B7	13	256652	64925.2	55912.9	377102	2894.86
B8	13	248938	58022.7	56686.4	380064	2369.07
B9	13	226266	58628	49561.4	348484	1535.95
B10	13	390028	93501.8	71544.3	485675	3567.52
B11	13	0	197.101	68.4854	273.202	16.4218
B12	13	0	147.496	0	0	0
C1	13	2695.78	745.309	635.812	822.085	615.859
C2	13	258750	71693.8	52418.8	394180	1984.88
C3	13	225726	61243.6	49940.7	357081	1978.71
C4	13	274096	71749.5	57819	389504	3026.96
C5	13	287050	73925.7	61574	399929	2481.13
C6	13	220510	57586.2	53184.3	347368	2049.94
C7	13	271920	69817.5	63644.7	411081	2835.98
C8	13	238092	55693.2	59246.3	383811	2370.3
C9	13	224810	51971.8	51298.7	340403	1817.55
C10	13	358097	80235.1	69020.9	453050	3485.33
C11	13	930.322	468.728	339.214	417.55	619.893
C12	13	0	0	0	213.493	224.072
D1	13	31395.6	6378.29	5347.87	7320.55	4881.62
D2	13	305249	83077.3	58244	413155	1772.31
D3	13	246928	66908	54574.9	367813	2075.46
D4	13	306077	79373.1	65696.6	415011	2680.64
D5	13	320848	83958.9	74742	459692	3356.58
D6	13	240754	64206.2	61360.5	378016	2182.08
D7	13	307138	83570.8	76060.6	457323	3547.41
D8	13	238341	59730.6	63003.8	393253	2104.04
D9	13	247677	62547.3	58280.2	365882	2955.3
D10	13	391563	95119.5	80036	508944	3154.38
D11	13	16936.2	5207.47	4924.87	7420.08	3478.49
D12	13	9904.78	1330.44	806.738	1134.44	12.85
E1	13	4815.9	850.038	456.197	657.461	291.135
E2	13	338475	103851	73083.2	519605	2516.37
E3	13	293516	82644.4	63759.3	414792	2082.91
E4	13	380904	101305	80407.7	484156	3323.45
E5	13	314676	77335.6	78595.8	474639	2953.63
E6	13	229654	56756.7	62700.4	375234	2575.56
E7	13	290290	71191.7	77813	460580	3284.93
E8	13	305545	80046	79843.4	479580	3050.02
E9	13	342313	102537	72271	430281	2456.8
E10	13	419926	105749	87306.3	550147	3744.15
E11	13	18466.9	2772.24	1992.24	2679.16	1325.98
E12	13	6081.32	1480.77	1020.06	2351.58	2704.73
F1	13	47181.4	8026.48	6219.19	7402.85	4148.01
F2	13	321584	93225	67736.1	480849	2200.18
F3	13	287310	80938.3	68049.4	442830	2442.64
F4	13	364899	95404.8	83838.9	517866	3587.39
F5	13	381202	91425.9	94797.5	584247	3072.82
F6	13	246785	62229.2	67004.5	407769	2040.95
F7	13	312752	79060	84853.5	507112	3205.52
F8	13	361682	95946.9	111757	704506	5249.4
F9	13	317139	82613.9	93085.4	609099	2948.59
F10	13	471937	120524	122828	837246	4211.25
F11	13	17906.6	3054.53	2042.34	2623.83	0
F12	13	0	0	0	0	251.826
G1	13	15381.6	4739.46	5106.66	10743.7	14804
G2	13	353638	102214	71011.9	509890	2403.48
G3	13	334450	92601.6	74886.2	513281	2337.31
G4	13	392077	103537	85551.4	542401	3248.61
G5	13	385971	96860.2	89668.3	558272	2883.19
G6	13	270978	70083.7	68726	426448	2723.9
G7	13	316253	81205.8	80349	498289	5343.88
G8	13	300891	78095.8	75773.1	473299	2630.47
G9	13	299761	77052.5	71123.7	452399	2998.83
G10	13	419464	103293	86079	564084	2600.33
G11	13	11766.5	3035.85	2828.43	4324.06	2791.03
G12	13	86997.8	16976.1	14052.8	18788.5	11247.8
H1	13	30412.4	5514.32	3965.76	6069.1	6406.59
H2	13	356688	104095	66461.9	493617	2439.57
H3	13	323727	93975.9	68963.5	487614	2636.5
H4	13	404885	110312	84696.4	564005	3532.98
H5	13	396696	94746.4	91671.1	583534	3782.5
H6	13	278900	67320.8	64248.6	412147	2555.32
H7	13	330611	79709.9	76766.6	491816	2999.92
H8	13	358102	91083.6	80500.1	519883	3660.57
H9	13	302435	77870.6	68045.2	457748	2931.44
H10	13	463266	113212	92110.1	629936	4315.77
H11	13	11295	1512.85	470.41	1283.4	1089.58
H12	13	21056	3495.65	1773.61	4084.69	4111.47
A1	14	43444.6	5257.02	3061.08	4240.21	1180.21
A2	14	248178	64707.4	42147.5	350446	2100.08
A3	14	212692	54639.7	39872.8	323494	1319.26
A4	14	277897	69905.5	52422	392704	2085.39
A5	14	266551	69273.4	51801.2	372417	1859.12
A6	14	200656	51758.7	43605.9	318163	1308.46
A7	14	270603	68710	54948.1	388882	2413.88
A8	14	241955	59441.7	53247.5	385572	2378.62
A9	14	250594	63047.5	52411.6	384580	2631.59
A10	14	401380	99479	71042.8	514410	3563.8
A11	14	0	0	0	0	0
A12	14	0	159.171	0	711.189	288.807
B1	14	0	0	0	249.958	217.14
B2	14	254719	70308.3	48031.8	379540	2062.16
B3	14	204560	56049.3	42568.9	323238	1330.93
B4	14	283443	72447.3	55476.7	390937	9301.46
B5	14	262247	68178	54420.8	368953	2256.53
B6	14	211478	54578.6	47459.3	319464	2243.04
B7	14	257816	64936.1	56033.3	377115	2633.36
B8	14	248806	58109.2	56545.2	380025	2413.62
B9	14	227815	59060.3	49868.1	348741	1533.49
B10	14	389788	93752.1	71560.4	486226	3733.63
B11	14	0	67.7859	78.7071	287.42	0
B12	14	0	125.077	0	0	0
C1	14	2231.92	895.667	561.512	868.032	430.241
C2	14	259985	72134.1	52437.7	394671	1900.97
C3	14	225811	61311.6	49969.8	356607	2114.5
C4	14	274541	72102.3	57854.9	389685	2632.35
C5	14	287532	73985.4	61718.9	399732	2734.43
C6	14	221034	57611	53218.8	347248	2019.42
C7	14	271912	69872.1	63908.9	411423	3029.64
C8	14	238020	55875.2	59234.8	383361	2437.1
C9	14	225168	52073.4	51455.1	340646	2025.02
C10	14	358451	80475.7	69020	453187	2995
C11	14	994.057	436.609	167.091	662.809	867.033
C12	14	0	103.025	0	358.756	17.5742
D1	14	30905.7	6501.68	5227.3	7148.73	4845.88
D2	14	306332	83804.1	58147.6	413506	1805.52
D3	14	247376	67223.4	54500.7	367934	2290.12
D4	14	306284	79811	65548.5	415230	2741.84
D5	14	322025	84309.4	74736.1	460041	3330.35
D6	14	241239	64400.9	61365.3	378191	2190.72
D7	14	307636	83933.6	76028.6	457616	3444.26
D8	14	238601	59957.4	63078.9	393552	2169.26
D9	14	248708	62956	58240	366174	2822.92
D10	14	392073	95356.9	80016.5	509910	3205.5
D11	14	17119.9	5367.48	4815.69	7361.79	3467.9
D12	14	9709.2	940.649	721.605	1259.83	384.511
E1	14	4434.02	876.003	692.94	690.334	287.034
E2	14	338857	104554	73272.9	519480	2348.99
E3	14	294143	82918.6	63776.4	414592	1861.88
E4	14	381957	101638	80488.3	483705	3453.61
E5	14	315368	77583.5	78607.8	474403	3119.41
E6	14	230324	56978.7	62706.2	374904	2795.32
E7	14	291154	71699	77915.2	460425	3170.75
E8	14	306025	80479.6	79636.7	480009	3147.68
E9	14	344126	103424	72193.5	430246	2416.4
E10	14	420845	105956	87268.1	550855	3719.02
E11	14	18289.9	2649.14	2032.32	2771.2	1606.78
E12	14	6455.31	1461.35	1206.5	2392.67	2701.48
F1	14	46733.8	8429.32	6030.17	7214.2	4076.82
F2	14	321675	93335.5	67786.8	480880	2174.44
F3	14	287834	81139.3	68088.8	442140	2251.77
F4	14	365787	95623.6	83861.1	517589	3457.84
F5	14	382300	91708.6	94760.7	583983	2868.11
F6	14	247170	62740.8	67065.8	407644	2387.41
F7	14	313344	79030.8	84908.3	507203	2908.11
F8	14	362543	96210.8	111914	704376	5026.75
F9	14	317923	83176.2	93200	609661	2934.57
F10	14	472291	121230	122921	836159	3974.63
F11	14	18531.6	2936.22	2037.14	2680.45	0
F12	14	0	0	0	0	577.567
G1	14	16137.8	4675.24	5212.01	11171.6	14844.6
G2	14	354555	102377	71000.7	510120	2569.11
G3	14	334606	92922.6	74978.2	513124	1740.04
G4	14	392920	104166	85548.4	542015	3191.36
G5	14	386286	97162	89778.9	558670	3354.28
G6	14	271267	70061.5	68814.6	426398	2605.39
G7	14	315920	81553.9	80381.3	498386	5093.55
G8	14	301005	77982.3	75963.2	474036	2736.39
G9	14	299891	77504.7	71193.4	452861	3137.82
G10	14	420871	103656	86234.3	564660	2921.14
G11	14	11623.4	2887.94	2803.95	4048.57	2754.76
G12	14	86799.7	17079.1	13955	19165.7	10818.4
H1	14	29810.8	5405.52	3899.18	6307.44	6635.94
H2	14	357082	104402	66449.1	493476	2139.63
H3	14	325320	94286.9	69041.6	487351	2849.18
H4	14	405512	110578	84991.4	563305	3811.41
H5	14	397328	95101	91716.1	583924	3743.24
H6	14	279170	67427.7	64383.5	412028	2330.09
H7	14	331083	79312.9	76856	491032	3184.52
H8	14	358281	91608.6	80392.6	520060	3588.21
H9	14	303061	78016	68020.7	457848	3175.55
H10	14	464538	113829	92327.4	629580	4189.81
H11	14	11841.6	1428.56	548.142	1653.72	1396.53
H12	14	21523	3348.81	2019.02	4115.88	4205.35
A1	15	43769.9	5176.6	3083.52	4164.49	1693.09
A2	15	248652	65204.9	42424.1	350247	2084.16
A3	15	212904	54980.8	39939.8	323911	1308.47
A4	15	278368	69820.2	52385.8	392999	1960.53
A5	15	266919	69357	51846.9	372525	1859.93
A6	15	200951	52329.8	43568.5	317858	954.451
A7	15	270869	68785.1	54987.5	388812	2376.88
A8	15	242453	59348.5	53380	385516	2587.01
A9	15	250866	63235.1	52270.9	384201	2024.3
A10	15	402013	99657.1	71042.8	514826	3576.89
A11	15	0	0	0	0	0
A12	15	0	13.9081	202.987	440.26	420.082
B1	15	0	0	0	188.493	349.023
B2	15	255464	70526.8	48170.5	379992	1765.19
B3	15	205012	56144.1	42636	323184	1666.36
B4	15	284286	72613	55650.2	391254	9290.25
B5	15	262800	68565.2	54430.9	369261	2435.17
B6	15	211546	54579.4	47562.6	319236	2313.26
B7	15	258002	65261.8	56090.9	377345	2579.84
B8	15	249048	58187.4	56757	380048	2428.74
B9	15	228357	59339.6	49988.9	350116	1749.51
B10	15	390627	93775.4	71659.5	486243	3519.03
B11	15	0	26.0715	76.6627	384.92	0
B12	15	0	0	0	151.466	0
C1	15	2139.15	676.611	555.422	818.359	223.725
C2	15	260578	72386.9	52474.4	394816	2156.85
C3	15	226472	61886.8	50117.1	357063	2064.87
C4	15	275200	72108	57946.3	389295	2843.33
C5	15	288512	74162.7	61586.6	400012	2823.94
C6	15	220928	57826	53342.4	347766	1928.69
C7	15	272551	69930.6	63824.6	411266	2666.94
C8	15	238833	55931.2	59329.4	383221	2597.1
C9	15	225435	52233.8	51425.7	340408	2058.08
C10	15	358843	80660.4	69216.2	453740	3485.33
C11	15	870.699	610.25	303.984	810.776	495.301
C12	15	0	31.2547	0	579.953	116.429
D1	15	31296	6680.61	5344.28	7170.82	4726.33
D2	15	307082	83621.8	58298.8	413644	2049.07
D3	15	248075	67305.4	54723.3	368213	2173.12
D4	15	307311	79642.9	65904.7	415038	2978.71
D5	15	322086	84507.2	74641.8	460469	3278.89
D6	15	241664	64521.2	61264.5	378530	2305.87
D7	15	307940	84107.7	76282.1	457841	3437.38
D8	15	238619	59772.8	63231.5	393581	2210.24
D9	15	248368	62881.8	58350.6	365735	2682.11
D10	15	392828	95311.9	80069.6	509585	3345.64
D11	15	17024.6	5062.19	4849.51	7337.9	3432.26
D12	15	9916.8	1131.79	741.875	1190.71	654.361
E1	15	4520.29	1199.89	567.919	665.679	341.707
E2	15	340257	104940	73239.4	519885	2516.37
E3	15	294386	83070.5	64003.3	414527	2036.09
E4	15	382557	101857	80700.3	483895	3085.58
E5	15	316040	77898.1	78837	474794	2996.35
E6	15	230060	56887.5	62550.5	374876	2450.54
E7	15	291013	71609.2	77890.6	461105	2917.01
E8	15	306366	80266.7	79924.1	480218	2983.89
E9	15	345950	104346	72363.1	430147	2272.26
E10	15	421421	106104	87436.7	549813	3461.46
E11	15	18587.1	2684.85	1985.86	2759.7	1617.55
E12	15	6301.42	1236.18	1031.66	2619.05	2737.22
F1	15	46511.6	8356.08	6152.65	7218.62	4113.9
F2	15	322153	93227.4	68187.6	481373	2406.16
F3	15	288529	81254.1	68236.7	442064	2484.35
F4	15	365565	95609.8	83999	517835	3367.35
F5	15	382445	91690.4	95050.6	584098	3168.21
F6	15	247202	62736.5	67037.8	407802	2233.53
F7	15	313550	79450.3	84930	506925	2887.08
F8	15	363279	96518.8	111768	704997	5069.26
F9	15	318472	83031.9	93167.9	609965	3445.78
F10	15	472872	121377	122999	836296	4356.21
F11	15	18456.8	2886.75	1852.33	2516.65	0
F12	15	0	0	0	0	453.803
G1	15	15809.8	4599.48	5091.16	10698.8	14525.5
G2	15	355097	102752	70822.3	510864	2350.72
G3	15	335280	93113.4	74960.5	513246	2065.83
G4	15	393538	104090	85640	542132	3270.33
G5	15	386937	97076.4	89930.4	558738	3212.28
G6	15	271900	70251.8	68879.4	425875	2736.86
G7	15	316586	81510.8	80304.7	498100	4865.63
G8	15	301758	78492.1	75909.2	473862	2782.06
G9	15	300469	77513.8	71397.4	452938	3071.88
G10	15	420770	104034	86304.9	564276	3085.91
G11	15	11978.6	2922.37	2846.79	4480.61	2955.42
G12	15	86749.1	17050.5	13876.7	19290.5	11156.5
H1	15	29994.7	5208.92	4174.03	6319.53	6627.45
H2	15	357371	104340	66453.7	493379	2076.67
H3	15	325094	93769.9	69207.5	486994	2568.78
H4	15	406250	111146	84844.4	565495	3758.73
H5	15	396788	95151.1	91422.2	583315	3595.04
H6	15	279792	67643.3	64355.1	411521	2532.98
H7	15	330331	79733	76931	490790	2869.45
H8	15	358979	91635.6	80643.7	520062	3366.5
H9	15	303454	78416.6	67999.5	458064	2665.92
H10	15	465323	113639	92339.8	629958	3928.03
H11	15	11223.2	1339.99	574.946	1534.74	1231.76
H12	15	21330.8	3444.66	1966.96	4033.31	3796.15
A1	16	43444.6	5739.56	3246.6	3804.07	1394.4
A2	16	248758	65166	42444.9	349937	1996.03
A3	16	213054	55144.5	40005.8	324003	1560.55
A4	16	279111	70447.4	52413.2	393487	1912.84
A5	16	266632	69547.6	51854.3	372352	1737.61
A6	16	200532	52135.5	43621.9	317664	1200.09
A7	16	271110	69024.1	54883.8	388304	2224.05
A8	16	242822	59464.8	53303.8	385260	2481.57
A9	16	251316	63325.5	52292	384181	2308.67
A10	16	402431	99667.2	71067.7	514150	3337.36
A11	16	0	0	0	0	0
A12	16	0	619.685	0	963.774	548.594
B1	16	0	0	0	62.8309	146.536
B2	16	256117	70927.7	48233.6	380345	2196.23
B3	16	204957	56156.2	42674.6	323358	1219.12
B4	16	284349	72594.3	55601.9	391193	9317.84
B5	16	263025	68731.1	54531.4	368971	2442.75
B6	16	212185	54983.4	47510.5	319792	2134.07
B7	16	258444	65490.8	56126	377403	2667
B8	16	249006	58237.4	56716.2	379872	2676.15
B9	16	228651	59702.7	49948.7	350857	1639.44
B10	16	390814	93996.1	71751.6	486361	3658.21
B11	16	0	150.172	195.234	297.577	0
B12	16	0	0	0	0	130.989
C1	16	2714.61	884.002	668.698	802.216	301.169
C2	16	261037	72488.3	52544.7	394748	2061.54
C3	16	226912	62003.1	50093.7	357218	2078.91
C4	16	275470	72264.6	58030.8	389271	3120.73
C5	16	289434	74538.1	61811.9	399757	2903.6
C6	16	221530	58157.5	53310.3	347523	2163.15
C7	16	273420	70426.9	63951.9	411629	2831.06
C8	16	238925	56184.1	59343.3	383434	2421.43
C9	16	225723	52044.8	51460.8	340343	1773.75
C10	16	358501	80621.4	69064.8	453166	3418.39
C11	16	1116.39	461.702	279.826	540.18	488.153
C12	16	0	0	0	248.708	94.4615
D1	16	31009.1	6597.93	5144.93	7072.64	4770.7
D2	16	308059	83990.4	58356.7	413919	1891.06
D3	16	248465	67543.7	54772.4	368004	2145.65
D4	16	307088	80151.7	65823.4	414720	2733.94
D5	16	322819	84704.9	75058.4	459807	3275.87
D6	16	242359	64601.1	61424.2	377864	2281.88
D7	16	308534	84593.7	76044.1	457318	3582.78
D8	16	239164	60016.6	63163.9	393551	2505.44
D9	16	248752	63190	58361.5	366119	2778.24
D10	16	393101	95574	79885.5	509237	2988.69
D11	16	16942.1	5172.13	4779.94	7216.54	3478.49
D12	16	9726.68	1211.25	771.266	1216.38	246.127
E1	16	4690.02	1173.93	751.461	788.953	147.618
E2	16	341029	105068	73333.2	519631	2133.79
E3	16	295542	83024.1	63900.6	414612	2119.93
E4	16	383100	102185	80580	483770	3230.32
E5	16	316312	77765.6	78886.1	474950	3087.89
E6	16	230886	57257	62743.2	374560	2641.98
E7	16	291579	71866.2	78020.4	461178	2786.24
E8	16	306439	80420.7	79939.3	479894	3112.07
E9	16	347066	105060	72412.3	430568	2459.55
E10	16	422079	106227	87401.2	548787	3977.49
E11	16	18384	2688.6	1978.57	2995.13	1375.32
E12	16	6466.05	1476.36	1085.52	2635.97	2651.12
F1	16	46997	8467.53	6216.16	7315.89	4038.26
F2	16	322517	93670.8	68006	481080	2323.07
F3	16	289529	81544.6	68160.1	442747	2250.73
F4	16	366830	95882.9	83864.2	517187	3492.8
F5	16	382283	91856.5	95117.8	584657	2995.65
F6	16	247674	63038.7	67131.3	407914	2287.17
F7	16	313537	79441.2	85015.9	506862	3211.26
F8	16	364029	97018.3	112013	703979	4812.2
F9	16	318871	83752.2	93201.1	609420	2875.25
F10	16	473520	121793	123097	836845	4089.74
F11	16	18751.7	2913.64	2068.29	2619.79	0
F12	16	0	0	0	0	210.571
G1	16	16124.2	4770.75	4974.96	10953	14220
G2	16	355839	103046	71171.6	511263	2275.88
G3	16	335412	93466	75125.6	512833	1607.46
G4	16	393868	104484	85687.3	542342	3230.84
G5	16	387567	97256.9	89897.1	557978	3219
G6	16	271826	70389.6	68798.2	425855	2687.79
G7	16	316440	81787	80525.2	498602	5386.85
G8	16	302195	78703.1	76041.4	473417	3117.31
G9	16	300812	77778.8	71380.2	452802	2956.22
G10	16	421558	104193	86334.2	564345	2888.41
G11	16	11793.8	3051.15	2637.5	4298.57	2608.5
G12	16	86621	16743	13995.4	18768.6	11012.1
H1	16	29347.1	5373.08	4167.2	6055.28	6899.27
H2	16	357905	104813	66734.3	493656	2295.32
H3	16	325126	94256.6	69178.6	487350	2755.32
H4	16	406370	111177	84903.4	563198	3630.81
H5	16	397145	95345.4	91727.1	582764	3546.95
H6	16	279864	67770.5	64206	411739	2220.15
H7	16	331137	80072.1	76992.5	490761	2987.36
H8	16	358726	91657.9	80645.6	520049	3408.24
H9	16	303782	78556.6	68013.3	457775	3154.13
H10	16	464899	114190	92390.7	629188	4187.34
H11	16	12036.6	1515.7	568.245	1657.73	1296.87
H12	16	21493.9	3403.88	2006	3906.69	3785.52
A1	17	43704.9	5232.4	3209.2	4356.81	1467.25
A2	17	249764	65200.4	42391.3	350293	1761.39
A3	17	213535	55400.6	39899.2	323822	1182.92
A4	17	279671	70136.5	52453.8	393019	2011.69
A5	17	267193	69498.9	51958.8	372394	2089.18
A6	17	201080	52152.6	43686.4	317617	1383.11
A7	17	271668	68946.5	55092	388692	2449.27
A8	17	243331	59838.1	53470.3	384853	2277.33
A9	17	251436	63693.9	52363.7	383458	2528.45
A10	17	401946	99384.9	71144.5	514040	3563.8
A11	17	0	0	0	0	0
A12	17	0	248.801	0	688.612	623.214
B1	17	0	0	0	45.0744	62.611
B2	17	256148	71002.5	48284.1	380710	1958
B3	17	205734	56195.6	42824.1	323630	1207.35
B4	17	285275	72841.5	55670	391314	9177.28
B5	17	263609	68854.9	54623.5	368682	2417.47
B6	17	212113	55059.1	47669.1	319547	2279.36
B7	17	258549	65588.9	56211.3	377553	2739.64
B8	17	249032	58441.5	56674.6	380167	2631.6
B9	17	229720	60027.5	50356.5	352062	1632.05
B10	17	392056	94056.2	71799.8	486044	3736.33
B11	17	0	0	188.079	117.812	0
B12	17	0	0	0	49.0037	0
C1	17	2309.9	1056.39	560.294	1022.02	255.686
C2	17	261252	72724.8	52672.8	394964	2124.73
C3	17	227138	61749.9	50101.2	356893	2041.46
C4	17	276598	72392.9	58204.8	389595	3144.17
C5	17	289503	74777.7	61760	399745	2715.63
C6	17	222249	58237.5	53216.4	347545	2034.68
C7	17	273642	70426.1	63947.9	411294	2942.66
C8	17	239321	56002.1	59212.8	383618	2429.68
C9	17	226096	52048	51529.1	340786	1897.73
C10	17	359187	80768.8	69198.1	453721	3803.52
C11	17	1140.03	449.658	240.57	835.099	608.659
C12	17	0	0	0	301.531	441.553
D1	17	30865.6	6612.74	5359.8	7169.59	4817.53
D2	17	308947	84317.7	58395.3	413958	1751.17
D3	17	249079	67550.6	54851.6	367569	2275.88
D4	17	308063	80280.7	65953.1	415044	2613.53
D5	17	323457	84925.7	74968	460487	3275.87
D6	17	242563	65224.8	61624	378193	2016.07
D7	17	309648	84578	76172.4	457584	3163.3
D8	17	239177	60208.5	63113.9	393741	2289.69
D9	17	248966	63057.4	58572.7	365817	2617.19
D10	17	393368	95400.1	80270.5	510042	3542.18
D11	17	16683	4886.48	4895.89	7390.46	3084.61
D12	17	9534.38	1227.35	673.971	1061.37	243.161
E1	17	4721.13	836.371	638.41	788.953	302.069
E2	17	341926	105592	73416.9	519701	2442.36
E3	17	296321	83588.4	63925.2	414362	2221.19
E4	17	384338	102624	80593.2	483248	3198.91
E5	17	316409	78034.5	78960.1	475082	3059.41
E6	17	230931	57194.3	62676.1	374630	2676.16
E7	17	291525	71989	77852.3	460796	2842.84
E8	17	307755	80804.3	80017.9	479625	2938.11
E9	17	348687	106405	72480.7	430533	2566.97
E10	17	421987	106402	87562.7	549038	4063.64
E11	17	18180	2846.48	2056	2726.95	1602.3
E12	17	6268.32	1272.39	1108.72	2630.33	2524.41
F1	17	46558.9	8602.87	6061.93	7426.43	3780.22
F2	17	323887	93614.9	68144	481343	1987.19
F3	17	290245	81805.6	68495.3	442596	2466.62
F4	17	367309	96042.6	84172.3	517134	3386.89
F5	17	383672	92216.3	95245.9	584338	2979.58
F6	17	248021	62956	67250.3	407790	2127.13
F7	17	314304	79658.8	85088.5	506765	3179.7
F8	17	364376	97190.4	112230	704965	4893.17
F9	17	319469	83920.9	93303.9	609747	3031.64
F10	17	474753	121940	123354	836377	4536.34
F11	17	18261.3	2983.55	2041.3	2415.54	36.7747
F12	17	0	0	0	0	362.698
G1	17	15913.5	4535.26	5165.53	10891	14931.9
G2	17	357054	103495	71332.6	510679	2210.86
G3	17	336464	93849	75171	513449	2067.09
G4	17	394126	104634	85728.7	542180	3202.22
G5	17	387879	97540.8	90023.9	558332	3018.47
G6	17	271990	70675.9	68768.9	425788	2741.49
G7	17	316718	81927.3	80423.7	498004	5047.78
G8	17	302349	78774	76130.2	473763	3137.71
G9	17	301342	78063.1	71316.6	452565	2952.17
G10	17	422191	104013	86416.8	564604	2948.42
G11	17	11433.5	3044.77	2769.69	4220.9	3212.88
G12	17	86777.4	17103.4	13848	19208.1	11373.6
H1	17	29822.8	4991.33	3912.83	6366.16	6544.2
H2	17	358047	105157	66394.4	493178	2099.56
H3	17	325408	94635.8	69113.7	487381	2432.14
H4	17	407309	111439	85137.6	563894	3694.77
H5	17	397493	95502.6	91631.1	582970	3882.6
H6	17	280273	67727.2	64312.5	411750	2462.37
H7	17	331753	80121.3	76972.3	490889	2981.56
H8	17	360452	91880	80515.9	520053	3466.68
H9	17	304604	78561.9	68226.9	457265	3069.55
H10	17	465768	114139	92280.2	629660	4402.2
H11	17	11223.2	1629.99	515.977	1512.01	1215.82
H12	17	21165.5	3779.14	1717.84	4383.79	3764.27
A1	18	43415.9	5232.4	3170.3	4199.32	1598.38
A2	18	250093	65623.4	42534.5	350248	1875
A3	18	214140	55379.9	40015.9	323979	1411.46
A4	18	279801	70650.8	52407.9	393548	1999.55
A5	18	267490	69784.5	52065.8	372468	1840.49
A6	18	201396	52352.3	43734.2	317389	1323.71
A7	18	271789	69126.9	55008.4	388599	2295.64
A8	18	243517	59960.1	53498.5	384892	2489.04
A9	18	251401	63408.3	52411.6	383884	2395.42
A10	18	403129	99957.6	71104.6	514259	3558.77
A11	18	0	0	0	0	0
A12	18	0	358.521	289.576	598.302	729.617
B1	18	0	0	0	114.735	0
B2	18	256857	71122.8	48325.3	380378	2068.8
B3	18	205140	56493.1	42760	323656	1378.01
B4	18	285252	73051.3	55676.1	390922	9453.23
B5	18	263709	68895.3	54646.2	368636	2307.93
B6	18	212463	55048.3	47714.7	319349	2280.17
B7	18	259345	65664.5	56116.3	377268	2694.53
B8	18	249521	58461.2	56820.6	380058	2454.99
B9	18	230736	60463.1	50400.8	353196	1419.32
B10	18	391947	94097.5	71739.9	486300	3351.11
B11	18	0	0	90.9731	208.202	0
B12	18	0	0	0	0	300.042
C1	18	2476.62	860.67	627.285	1056.79	426.553
C2	18	261848	72652.9	52856.5	395315	2210.72
C3	18	227278	62213.5	50195	356626	2420.72
C4	18	276816	72657	58119.3	389399	3058.21
C5	18	290522	75039.8	61911.1	399805	2795.29
C6	18	222973	58420.7	53470.9	347378	2104.54
C7	18	274457	70483.1	63965.4	411615	2931.99
C8	18	239575	56439.4	59344.9	383144	2357.93
C9	18	226321	52358.4	51586.1	340608	2003.53
C10	18	359734	80861.2	69274.7	453634	3560.97
C11	18	960.133	438.617	192.255	657.742	681.167
C12	18	0	0	0	451.197	169.152
D1	18	30925.1	6621.38	5402.78	7345.09	4725.1
D2	18	310062	84509.2	58493.8	413935	1920.25
D3	18	250158	67662.4	54847.6	367557	1898.43
D4	18	309610	80163.5	65929.8	414710	2656.96
D5	18	324080	85295.5	74923.8	460315	3287.97
D6	18	242930	65187.1	61508.9	378306	2370.16
D7	18	309747	84849.2	76354	457139	3627.97
D8	18	239123	60068.4	63240.7	393877	2235.33
D9	18	249311	63135.6	58615.5	366041	2695.6
D10	18	393472	95476.9	80276.7	510081	3317.43
D11	18	16673.1	4728.44	4893.95	7589.22	3288.77
D12	18	9649.1	1060.91	806.738	1220.33	156.177
E1	18	4419.88	930.668	614.469	567.06	453.788
E2	18	342890	105544	73449.2	520507	2302.31
E3	18	297617	84031.4	64005.4	414692	1980.56
E4	18	385559	102386	80560.1	483022	3325.7
E5	18	316247	78165.1	79002.2	475189	3205.87
E6	18	231179	57397	62806.5	374948	2699.6
E7	18	291821	71898.3	78033.2	461379	2860.41
E8	18	307378	81058.3	80082.5	479556	2941.16
E9	18	350289	107183	72625.6	430545	2430.17
E10	18	422210	106191	87511.2	549201	3629.28
E11	18	18211.6	2666.99	2091.53	2792.45	1447.09
E12	18	6308.58	1223.82	1160.1	2739.08	2785.95
F1	18	46800	8305.12	6095.19	7343.9	3752.04
F2	18	323931	93499.5	68224.1	481498	2617.98
F3	18	291023	82067.8	68495.3	442631	2392.57
F4	18	368120	96107.6	84226	517496	3415.68
F5	18	383793	92011.6	95226	584658	2942.06
F6	18	248387	63086.9	67264.2	407625	2225.61
F7	18	314445	79675.2	85153.7	507112	3369.05
F8	18	364413	97437.8	112138	703836	5171.47
F9	18	320301	84318.7	93350	609221	2886.04
F10	18	475714	122418	123329	836821	4359.41
F11	18	18321.1	3041.63	2064.14	2486.32	0
F12	18	0	0	0	0	303.395
G1	18	16192.2	4778.98	5236.8	10960.8	14757.3
G2	18	357904	103801	71271.4	511048	2338.45
G3	18	337314	94014.5	75196.2	513514	1899.15
G4	18	395686	104614	85955.3	541971	3580.28
G5	18	387753	97503.2	89855.1	558230	3248.74
G6	18	272705	70678.6	68842	426075	2494.28
G7	18	316920	82323.2	80627.7	497960	4964.65
G8	18	302768	78960.4	76152.4	473624	3001.67
G9	18	301135	78116.7	71232.8	452790	2779.7
G10	18	421912	104424	86167	564819	3014.99
G11	18	11648.1	2640.59	2778.25	3878.67	3023.11
G12	18	86206.9	17340.8	13934.1	18883.4	10888.7
H1	18	29802.8	5707.1	3967.46	6276.35	5772.9
H2	18	358761	105180	66576	493122	2349.13
H3	18	326119	94931.6	69255.6	487303	2457.09
H4	18	407919	111690	85101	564078	3833.98
H5	18	397957	95683.9	91822	582597	3561.67
H6	18	280060	67845.6	64379.9	411194	2776.98
H7	18	331629	80262	76953.1	490206	3031.82
H8	18	359908	92034.2	80733.6	520270	3632.74
H9	18	303899	78864.5	68266.2	457691	2980.69
H10	18	465779	114110	92303.8	629747	4102.14
H11	18	11865.1	1445.7	448.967	1501.32	1219.8
H12	18	20904	3463.02	1926.06	4341.59	3704.04
A1	19	43289.6	5288.2	3255.58	4079.69	1744.09
A2	19	250018	65628	42588.1	350363	1858.01
A3	19	214236	55847.4	39995.6	323820	1514.45
A4	19	280322	70705	52521.9	393188	1904.17
A5	19	268302	69510.3	51908.2	372372	2022.76
A6	19	201569	52426.9	43745.3	317765	1075.66
A7	19	271538	69352.4	55168.4	388438	2298.05
A8	19	243546	60087.1	53415.7	385010	2366.99
A9	19	251805	63600.6	52399.1	383385	2257.58
A10	19	403251	99521.5	71149.5	513769	3549.71
A11	19	0	0	0	0	0
A12	19	0	222.53	56.7796	611.002	710.271
B1	19	0	0	0	0	82.5933
B2	19	257199	71287.6	48216.4	380456	1860.48
B3	19	205965	56490.1	42797.6	322793	1521.2
B4	19	285674	73168.5	55782.2	391205	9617.95
B5	19	264655	69057.9	54739.1	368846	2365.23
B6	19	212667	55086.1	47604.2	319223	1971.84
B7	19	259597	65647.1	56297.3	377722	2716.71
B8	19	248948	58328.5	56793.1	379857	2466.92
B9	19	231271	60776.5	50650	354137	1562.23
B10	19	392073	94186.3	71831.1	485914	3626.78
B11	19	0	20.8572	72.5741	59.9216	0
B12	19	0	0	0	0	0
C1	19	2533.09	880.113	820.952	954.96	358.944
C2	19	262215	73100.8	52778.8	395802	2336.07
C3	19	227599	62523.4	50232.6	356827	1984.33
C4	19	276965	72893.8	58292.3	389924	2780.82
C5	19	291504	75200.7	62025.5	400334	2548.26
C6	19	223973	58668.4	53560	347088	2178.41
C7	19	275204	70855.7	64105.5	411692	3022.26
C8	19	239618	56597.8	59544.6	383677	2612.77
C9	19	226227	52522.7	51530	340144	1911.78
C10	19	359847	80966.3	69473.5	453557	3211.48
C11	19	1240.77	484.787	343.24	851.315	658.7
C12	19	0	0	0	579.953	0
D1	19	30766.1	6391.86	5226.11	6962.19	4633.9
D2	19	312172	84800.5	58418.6	413997	1754.19
D3	19	251779	67829.5	54814.5	367611	2005.26
D4	19	311168	80852.2	66030.5	414623	2957
D5	19	324644	85528.2	75141.9	460594	3575.51
D6	19	243459	65344.2	61617.3	377638	2228.14
D7	19	309821	85120.5	76292.8	457562	3374.51
D8	19	239132	59844	63225.7	393523	2060.55
D9	19	250114	63102.7	58507.3	366152	2804.37
D10	19	393763	95532.5	80292.6	509872	3085.63
D11	19	16811.1	5136.8	4814.72	7232.79	3294.55
D12	19	9556.23	1135.01	791.536	1215.4	49.423
E1	19	3907.88	1182.13	615.799	719.098	310.27
E2	19	343908	106051	73580.9	520855	2379.74
E3	19	299712	83922.8	64003.3	414598	2288.7
E4	19	387812	103041	80605.4	483316	3419.95
E5	19	317060	78087.8	78907.1	474762	2930.24
E6	19	231320	57650.4	63009.9	374988	2659.56
E7	19	292275	71919.1	78040.1	460888	3055.59
E8	19	307954	81118.2	80330.6	479572	2846.55
E9	19	351544	107576	72736.8	430405	2637.66
E10	19	422339	106434	87760.5	548648	3851.85
E11	19	18249.8	2800.43	1979.48	2707.48	1380.7
E12	19	6139.48	1231.77	986.085	2538.49	2556.09
F1	19	46377.6	8515.3	6219.19	7299.68	3615.6
F2	19	324819	93820.2	68049.6	481737	2511.49
F3	19	291489	82059.3	68507	442312	2520.86
F4	19	368411	96529.5	84110.5	517745	3473.26
F5	19	383634	92273	95097.9	583986	3173.57
F6	19	248365	62978	67450.5	407529	2198.35
F7	19	314925	80046.4	85143.3	507396	3402.52
F8	19	365340	97745.7	112342	705023	5320.24
F9	19	320770	84474.7	93491.3	610112	3217.14
F10	19	476665	122730	123702	837167	4356.21
F11	19	18381	3023.34	2099.44	2559.12	0
F12	19	0	0	0	0	745.165
G1	19	15961.1	4566.55	5170.18	11281.6	15111
G2	19	358952	103942	71347.5	511363	2383.85
G3	19	338838	94424	75560.4	513601	2054.46
G4	19	396207	104953	85905.1	542012	3352.26
G5	19	388492	97813.4	90028.6	558331	3308.23
G6	19	273148	70941.8	68969.8	425807	2407.25
G7	19	317008	82137	80520.6	498345	5044.98
G8	19	302607	79306.6	76090.7	473763	2752.91
G9	19	301455	78039.8	71571.1	452875	3017.09
G10	19	421869	104535	86230	565295	3053.18
G11	19	11515.4	2797.42	2681.56	3967.26	2884.1
G12	19	86473.5	17143.5	13874.1	18637.4	11146.6
H1	19	29375.1	5193.65	3912.83	6062.19	6321.64
H2	19	359899	105247	66511.9	493966	2404.08
H3	19	326877	94816.6	69232.7	487559	2896.71
H4	19	409199	111837	85085.1	563903	3966.61
H5	19	398515	95905.2	91863	582289	3617.61
H6	19	280299	67889.8	64368.4	411061	2776.98
H7	19	331920	80386.3	77040.6	490244	3095.6
H8	19	360458	92348.3	80741	520667	3480.6
H9	19	304991	79053	68283.2	457369	3218.37
H10	19	466096	114650	92645.2	629268	3894.69
H11	19	11340.4	1544.27	486.493	1618.96	1404.5
H12	19	21324.1	3805.65	2026.45	4317.73	3904.21
A1	20	43192	5171.67	3065.57	4010.03	1573.61
A2	20	250424	65895.1	42391.3	350196	1956.75
A3	20	214163	55553	40012.9	323713	1302.59
A4	20	280342	70906.6	52491.9	393761	1768.9
A5	20	268437	69839.6	52046.2	372259	1928.79
A6	20	202018	52479.7	43821.8	317527	1113.39
A7	20	272339	69407.8	55082.3	388619	2327.81
A8	20	244259	60308.8	53579.7	384634	2501.49
A9	20	252975	63870	52538.8	383610	2112.02
A10	20	404337	99767.4	71128.5	513292	3566.82
A11	20	0	0	0	0	0
A12	20	0	326.069	122.076	555.969	721.326
B1	20	0	0	0	198.054	0
B2	20	257633	71627.7	48481.3	380157	1771.84
B3	20	206059	56727.2	42823.1	323330	1336.81
B4	20	286068	73334.2	55799.5	391153	9492.04
B5	20	264834	69080.2	54745.9	369019	2416.63
B6	20	213520	55576.7	47738.7	319472	2202.68
B7	20	259749	65897.2	56256.2	377660	2615.01
B8	20	249715	58438.5	56707.6	379887	2593.41
B9	20	232472	61199	50889.2	355507	1756.9
B10	20	393107	94110	71779.2	486264	3519.03
B11	20	0	0	90.9731	173.671	40.028
B12	20	0	0	0	12.2509	91.8039
C1	20	2728.05	697.35	734.472	680.517	204.057
C2	20	263091	73022.3	52704.3	395643	2360.93
C3	20	228156	62455.4	50274.8	356934	2209.08
C4	20	277261	72733.4	58325.3	389910	2701.7
C5	20	293533	75349.4	62069.4	399995	2621.65
C6	20	224990	58883.4	53437.2	347216	1962.41
C7	20	277722	70964.9	64090.4	411591	2734.23
C8	20	239990	56464.6	59414.2	383372	2583.91
C9	20	226965	52581.4	51792.1	340596	1952.28
C10	20	360538	80829	69402.9	453604	3360.14
C11	20	1529.63	516.906	349.28	844.221	614.786
C12	20	0	0	0	403.876	0
D1	20	31359.4	6755.88	5181.94	7303.36	4975.28
D2	20	315795	85425.4	58560.8	414083	1921.26
D3	20	254690	68403.9	54732.3	367352	2173.12
D4	20	314689	80823.1	66032.4	414645	2785.26
D5	20	325470	85465.6	75132.1	460551	2973.2
D6	20	244358	65508.4	61682.9	377868	2601.42
D7	20	310644	85346.4	76241.3	457667	3364.69
D8	20	239718	60344.6	63351.7	393777	2325.64
D9	20	250099	63569.9	58591.2	366796	2578.4
D10	20	393734	95641.9	80321.9	510416	2961.36
D11	20	16632.4	5095.57	4774.14	7149.65	3472.71
D12	20	9389.06	1044.81	791.536	1134.44	444.807
E1	20	4626.37	1119.26	654.37	1047.83	509.828
E2	20	346625	106188	73490.5	520744	2386.57
E3	20	303124	84432.3	64184.2	415251	2195.06
E4	20	392684	103637	80669.4	482647	3326.82
E5	20	317399	78236.6	79086.3	474776	3024.83
E6	20	232066	57637.5	62822.1	374947	2786.53
E7	20	293245	72075	78184.6	460980	3036.07
E8	20	308459	81419.3	80215.6	480234	3445.76
E9	20	352554	108390	72883.6	430492	2722.12
E10	20	423173	106374	87646.1	550350	3757.61
E11	20	18231.2	2612.49	1950.33	2874.76	1507.2
E12	20	6204.79	1226.47	1140.21	2479.68	2649.49
F1	20	46180.7	8230.29	6210.11	6925.34	3876.61
F2	20	326696	93709.7	68254.8	481739	2485.74
F3	20	293816	82559.3	68490	442700	2308.09
F4	20	371156	96804.5	84164.2	517384	3580.19
F5	20	384428	92344	95257.5	584537	3084.61
F6	20	248433	63299.6	67156.7	408217	2106.9
F7	20	315090	80166.1	85056.4	506942	3418.78
F8	20	366129	98129.9	112424	705595	4699.87
F9	20	321742	84669.9	93715.1	610992	3002.52
F10	20	476449	122629	123581	837469	4148.37
F11	20	18541.2	2838.35	1942.66	2613.72	0
F12	20	0	0	0	0	562.956
G1	20	15701.1	4693.35	5066.37	11129.7	14846.1
G2	20	361406	104587	71293.9	511849	2369.12
G3	20	341118	94253.4	75502.4	513462	2049.41
G4	20	398062	105576	85815.4	542104	2989.99
G5	20	388653	97790.9	90063.9	557910	3184.46
G6	20	272358	70691.9	68954.2	425979	2581.31
G7	20	317147	82317.8	80581.5	497919	5076.74
G8	20	303743	79230.9	76176.6	473925	3143.54
G9	20	301333	78313	71448.9	453139	2950.14
G10	20	423000	104819	86569.9	564877	3129.56
G11	20	11685.9	2799.97	2788.04	3923.57	2690.7
G12	20	86041.5	17159.2	13992.8	19146.9	10823.3
H1	20	29706.9	5340.63	4180.86	6390.34	6941.75
H2	20	360097	105100	66723.8	493892	2228.93
H3	20	327496	95145.3	69282	487922	2531.95
H4	20	409137	112055	85203.1	564018	3555.56
H5	20	398491	95694.9	91692.1	582366	3744.22
H6	20	281136	68166.3	64579.5	411398	2491.86
H7	20	332453	80316.9	76991.6	490301	3050.18
H8	20	360955	92113.2	80768.8	520257	3389.69
H9	20	305185	79411.6	68309.8	457544	2987.11
H10	20	466228	114446	92305	629595	4396.03
H11	20	11321.4	1577.13	557.523	1620.3	1101.54
H12	20	20977.8	3630.26	1909.33	4185.61	3528.67
A1	21	43228.3	5245.53	3209.2	3734.41	2022.39
A2	21	250728	66013.1	42567.3	350027	2097.96
A3	21	214130	55538.5	40062.6	323707	1527.2
A4	21	280699	70730.7	52413.2	393424	1866.88
A5	21	268387	69700.9	51846.1	371898	1949.04
A6	21	202112	52531.7	43852.9	317561	1377.49
A7	21	272243	69438.6	55034.1	388500	2392.16
A8	21	244598	60308.8	53586.3	385010	2336.28
A9	21	253348	64159.4	52620.2	383672	2255.65
A10	21	405345	99638.8	71207.3	513851	3778.18
A11	21	0	0	0	0	0
A12	21	0	313.706	0	962.363	258.406
B1	21	0	0	0	5.46356	0
B2	21	257711	71885.9	48422.8	380547	2037.78
B3	21	206516	56722.1	42942	323799	1444.7
B4	21	286257	73453.9	55717.5	391611	9447.2
B5	21	265115	69138.8	54828.6	368926	2077.06
B6	21	213811	55484	47813.2	319669	1941.97
B7	21	260715	65810.7	56129.8	377886	2633.36
B8	21	249781	58333.8	56837.1	380226	2347.59
B9	21	233362	61378.1	50873.6	356675	1647.66
B10	21	393426	94267	71965.1	486708	3575.6
B11	21	0	0	115.505	191.952	0
B12	21	0	277.293	0	0	58.2171
C1	21	2566.71	524.957	618.759	547.643	495.392
C2	21	263152	73070.2	52782	395691	2007.67
C3	21	228367	62570.9	50272.9	357200	1826.07
C4	21	277891	72907	58315.6	390035	2653.84
C5	21	296723	75676.4	62099.8	399916	2817.67
C6	21	228105	59329.8	53616.1	347215	1882.12
C7	21	280094	71330.7	64217.7	412154	2947.58
C8	21	240536	56720.7	59325.3	383756	2708.44
C9	21	227209	52734.6	51688.7	340398	1888.64
C10	21	360945	80562.1	69392.6	454167	3340.15
C11	21	1100.97	372.373	270.767	548.287	535.13
C12	21	0	76.4003	0	369.761	437.159
D1	21	31440.8	6949.61	5346.67	7103.32	4717.7
D2	21	323157	86387.9	58609.5	414445	2010.83
D3	21	260499	68878.4	54786.4	367991	1957.44
D4	21	320462	81593.5	66106	414662	2572.07
D5	21	325853	85971.6	75240.1	460692	3095.27
D6	21	244537	65796.5	61628.7	377990	2266.52
D7	21	311010	85362.1	76246.2	457542	3459.98
D8	21	239563	60117	63258.2	393611	2215.26
D9	21	250309	63557.6	58518.2	366327	2877.73
D10	21	394271	95581.1	80229.8	510482	3064.48
D11	21	16470.6	5175.08	4715.2	7387.59	3479.45
D12	21	9648.01	913.804	749.983	1090.01	414.165
E1	21	4320.87	658.711	760.771	739.643	306.17
E2	21	350540	106765	73484.9	520997	2377.46
E3	21	310273	85546.1	64125.3	415228	1889.1
E4	21	399987	104435	80662.8	482997	3005.92
E5	21	317543	78296.6	79037.2	474964	3200.78
E6	21	231786	57732.4	63032.3	375424	2744.53
E7	21	293127	72496.3	78237.7	461000	3047.79
E8	21	308527	81416.4	80255.9	479339	3109.02
E9	21	354031	109147	73167.1	430746	2666.12
E10	21	423819	106580	87771.2	550732	3823.13
E11	21	18063.5	2963.95	1982.22	2681.81	1520.66
E12	21	6474.1	1328.01	1097.12	2426.51	2629.19
F1	21	46439.1	8457.98	6122.41	7218.62	4223.64
F2	21	329834	94216.2	68188.8	481755	2307.85
F3	21	296698	83040.4	68368.6	442548	2338.34
F4	21	374069	97042.1	84170.2	517333	3604.87
F5	21	384705	92302.4	95381.4	584002	3253.95
F6	21	248720	63319.8	67276.5	407898	2393.57
F7	21	314928	80174.4	85299	507036	3025.74
F8	21	366693	98359.7	112332	704309	4896.2
F9	21	322037	84804.6	93674.4	609816	3135.17
F10	21	477748	123595	123699	838075	3947.98
F11	21	18118.1	2781.35	2051.68	2777.52	0
F12	21	0	0	0	0	410.829
G1	21	16238	4395.28	5249.2	10588.7	15007.2
[truncated: 10,967 more rows]

## Sheet: Multicomponent Data
Block Type	96alum
Chemistry	SYBR_GREEN
Experiment File Name	D:\HAIFENG\1117CBF34Untitled.eds
Experiment Run End Time	2013-01-10 03:05:40 AM CST
Instrument Type	sds7500
Passive Reference	ROX
Well	Cycle	SYBR	ROX
A1	1
A2	1	245019	355021
A3	1	210336	326255
A4	1	273401	395401
A5	1	260177	375506
A6	1	198456	320968
A7	1	267664	395049
A8	1	243029	393334
A9	1	250907	392260
A10	1	396412	516969
A11	1
A12	1
B1	1
B2	1	249074	377111
B3	1	201132	323823
B4	1	275080	388270
B5	1	253776	367749
B6	1	206641	319338
B7	1	251225	376921
B8	1	247076	382162
B9	1	221562	344337
B10	1	382638	483376
B11	1
B12	1
C1	1
C2	1	250698	387774
C3	1	219823	356461
C4	1	265002	388098
C5	1	279677	397721
C6	1	217395	349860
C7	1	265962	410812
C8	1	235621	385429
C9	1	220698	340036
C10	1	350406	449153
C11	1
C12	1
D1	1
D2	1	294887	406530
D3	1	243363	368526
D4	1	298628	414927
D5	1	311734	457628
D6	1	235676	379990
D7	1	298264	459493
D8	1	234929	392770
D9	1	242209	364989
D10	1	383988	504365
D11	1
D12	1
E1	1
E2	1	330957	509803
E3	1	287061	411644
E4	1	373212	486091
E5	1	306675	471121
E6	1	224629	376775
E7	1	284325	460842
E8	1	300539	481101
E9	1	319789	428286
E10	1	409736	543162
E11	1
E12	1
F1	1
F2	1	315027	475527
F3	1	279888	440291
F4	1	355801	515835
F5	1	373676	581405
F6	1	243034	409632
F7	1	308264	509565
F8	1	353834	702332
F9	1	310893	609475
F10	1	458566	824352
F11	1
F12	1
G1	1
G2	1	342479	504946
G3	1	325690	509970
G4	1	384475	541016
G5	1	381290	559206
G6	1	266989	425349
G7	1	313682	499198
G8	1	301373	481802
G9	1	297990	455863
G10	1	414776	562072
G11	1
G12	1
H1	1
H2	1	353946	503021
H3	1	322962	494108
H4	1	406157	574039
H5	1	396177	595598
H6	1	276430	418751
H7	1	332885	505878
H8	1	357736	525502
H9	1	302151	463333
H10	1	465912	638426
H11	1
H12	1
A1	2
A2	2	244782	354363
A3	2	210945	325717
A4	2	273931	394624
A5	2	261222	374230
A6	2	198734	320500
A7	2	267770	392589
A8	2	241247	390577
A9	2	249713	388986
A10	2	398106	517123
A11	2
A12	2
B1	2
B2	2	250084	377196
B3	2	201520	323048
B4	2	277654	389082
B5	2	255553	367473
B6	2	207899	319165
B7	2	253299	377177
B8	2	248060	381784
B9	2	220649	341117
B10	2	384699	484684
B11	2
B12	2
C1	2
C2	2	252658	389126
C3	2	221498	356648
C4	2	266805	387723
C5	2	280618	398125
C6	2	217518	348673
C7	2	266526	410734
C8	2	235645	384697
C9	2	221372	339665
C10	2	352923	449559
C11	2
C12	2
D1	2
D2	2	296775	408046
D3	2	244175	367895
D4	2	299528	415214
D5	2	312926	458052
D6	2	236360	379579
D7	2	299175	458878
D8	2	235976	392735
D9	2	243462	364851
D10	2	385935	505479
D11	2
D12	2
E1	2
E2	2	333217	512108
E3	2	288481	412234
E4	2	375710	485633
E5	2	308775	471943
E6	2	225754	376267
E7	2	286063	461010
E8	2	301452	481231
E9	2	321641	428197
E10	2	412612	545637
E11	2
E12	2
F1	2
F2	2	316740	476466
F3	2	282029	440776
F4	2	359153	516632
F5	2	375872	583345
F6	2	243719	408884
F7	2	309589	508729
F8	2	356077	704146
F9	2	312541	609020
F10	2	462125	828729
F11	2
F12	2
G1	2
G2	2	344570	506302
G3	2	327131	510175
G4	2	387195	541567
G5	2	382583	559312
G6	2	268950	426014
G7	2	313457	499671
G8	2	300362	478535
G9	2	298306	455425
G10	2	415513	562015
G11	2
G12	2
H1	2
H2	2	355455	502956
H3	2	323820	492909
H4	2	405491	571129
H5	2	397218	594489
H6	2	277812	418785
H7	2	332623	503162
H8	2	358171	525056
H9	2	302669	462375
H10	2	466446	638461
H11	2
H12	2
A1	3
A2	3	244783	352684
A3	3	210758	324712
A4	3	274275	393794
A5	3	261929	373307
A6	3	198765	319354
A7	3	266843	390514
A8	3	240947	389232
A9	3	249171	387601
A10	3	398326	515996
A11	3
A12	3
B1	3
B2	3	251535	377579
B3	3	201748	322934
B4	3	278285	389697
B5	3	256410	368030
B6	3	208285	318911
B7	3	253487	376465
B8	3	247367	381060
B9	3	220424	340180
B10	3	385542	484534
B11	3
B12	3
C1	3
C2	3	253828	389949
C3	3	222191	356714
C4	3	267875	388038
C5	3	281816	398597
C6	3	217923	348046
C7	3	267237	410344
C8	3	235584	383951
C9	3	222036	339684
C10	3	353836	450575
C11	3
C12	3
D1	3
D2	3	297918	409573
D3	3	244869	367776
D4	3	300251	415185
D5	3	313400	458275
D6	3	237414	379016
D7	3	299150	457369
D8	3	237046	392321
D9	3	244789	364684
D10	3	387347	506367
D11	3
D12	3
E1	3
E2	3	334085	513290
E3	3	289179	412818
E4	3	376354	486619
E5	3	310119	472201
E6	3	226060	375427
E7	3	286098	461111
E8	3	301178	480234
E9	3	323350	428621
E10	3	414033	548538
E11	3
E12	3
F1	3
F2	3	319450	477101
F3	3	283386	441183
F4	3	360291	517409
F5	3	376284	583161
F6	3	244164	407664
F7	3	310147	508004
F8	3	355918	703209
F9	3	313026	608048
F10	3	463477	830621
F11	3
F12	3
G1	3
G2	3	345955	506758
G3	3	328297	510300
G4	3	388181	542138
G5	3	383299	559402
G6	3	269657	425683
G7	3	313430	498749
G8	3	298843	475117
G9	3	297942	453690
G10	3	415565	562816
G11	3
G12	3
H1	3
H2	3	356117	501547
H3	3	323356	491342
H4	3	405121	569838
H5	3	397078	592083
H6	3	277877	416854
H7	3	331105	500617
H8	3	357474	522943
H9	3	302093	460259
H10	3	465674	636393
H11	3
H12	3
A1	4
A2	4	245579	351758
A3	4	211755	324547
A4	4	275157	393621
A5	4	263056	373049
A6	4	199398	319428
A7	4	268204	389856
A8	4	240902	387864
A9	4	249221	386763
A10	4	399885	515895
A11	4
A12	4
B1	4
B2	4	252053	378126
B3	4	202829	322965
B4	4	279723	390162
B5	4	257779	368150
B6	4	208868	319478
B7	4	254610	376735
B8	4	248606	381000
B9	4	221067	340566
B10	4	387296	484939
B11	4
B12	4
C1	4
C2	4	255544	391042
C3	4	223401	356962
C4	4	269620	388195
C5	4	283681	398984
C6	4	218779	348063
C7	4	268082	409944
C8	4	236509	384158
C9	4	222756	340075
C10	4	355696	451065
C11	4
C12	4
D1	4
D2	4	299596	410027
D3	4	245800	367851
D4	4	302118	415331
D5	4	315112	458831
D6	4	238021	378342
D7	4	300835	457827
D8	4	237034	392590
D9	4	245005	364928
D10	4	388387	507213
D11	4
D12	4
E1	4
E2	4	335649	514764
E3	4	290685	413567
E4	4	377524	485973
E5	4	311541	473319
E6	4	227463	375163
E7	4	287760	461326
E8	4	302614	480374
E9	4	326333	428958
E10	4	415938	548941
E11	4
E12	4
F1	4
F2	4	320445	478550
F3	4	284790	441749
F4	4	362522	518523
F5	4	378361	584052
F6	4	245215	408328
F7	4	311389	508382
F8	4	357703	703915
F9	4	314211	608784
F10	4	465729	832733
F11	4
F12	4
G1	4
G2	4	347609	507805
G3	4	330224	511660
G4	4	389760	542801
G5	4	384583	559832
G6	4	271040	426026
G7	4	314132	499755
G8	4	300039	475536
G9	4	299221	454283
G10	4	417207	563543
G11	4
G12	4
H1	4
H2	4	356224	499693
H3	4	323701	489382
H4	4	405510	568462
H5	4	397810	590790
H6	4	278618	415406
H7	4	331926	498638
H8	4	357869	522691
H9	4	302410	459909
H10	4	465920	634465
H11	4
H12	4
A1	5
A2	5	245850	351271
A3	5	211640	324313
A4	5	275712	393213
A5	5	264185	372945
A6	5	200283	318858
A7	5	269054	389609
A8	5	241315	387174
A9	5	249991	386474
A10	5	400630	515519
A11	5
A12	5
B1	5
B2	5	253378	378860
B3	5	203593	323283
B4	5	281366	390514
B5	5	259003	368684
B6	5	210374	319494
B7	5	255088	377354
B8	5	248714	381399
B9	5	222474	341740
B10	5	388414	485850
B11	5
B12	5
C1	5
C2	5	256641	391697
C3	5	224224	357511
C4	5	271267	389078
C5	5	284625	398998
C6	5	219318	347975
C7	5	269528	410891
C8	5	237235	383937
C9	5	223925	340272
C10	5	356951	451805
C11	5
C12	5
D1	5
D2	5	301541	411387
D3	5	246651	368524
D4	5	303179	415112
D5	5	316034	459542
D6	5	238986	378702
D7	5	302327	458653
D8	5	237964	392627
D9	5	246345	365263
D10	5	389968	508072
D11	5
D12	5
E1	5
E2	5	337235	516959
E3	5	292298	414531
E4	5	379128	486429
E5	5	312715	474569
E6	5	228580	375703
E7	5	289070	461364
E8	5	303690	480486
E9	5	328708	430347
E10	5	417068	550800
E11	5
E12	5
F1	5
F2	5	321602	478853
F3	5	286272	442729
F4	5	363901	519442
F5	5	379604	584829
F6	5	246605	408942
F7	5	312429	508447
F8	5	359046	703954
F9	5	314886	608610
F10	5	467802	832952
F11	5
F12	5
G1	5
G2	5	349892	509050
G3	5	331482	511779
G4	5	391089	543559
G5	5	385137	560189
G6	5	271522	426400
G7	5	315060	499350
G8	5	300303	475456
G9	5	299384	454028
G10	5	418878	564438
G11	5
G12	5
H1	5
H2	5	357462	499429
H3	5	324377	489737
H4	5	406082	568140
H5	5	397976	589743
H6	5	279585	415323
H7	5	332305	496861
H8	5	358128	522266
H9	5	303196	459369
H10	5	466001	633305
H11	5
H12	5
A1	6
A2	6	247233	351313
A3	6	212718	324092
A4	6	276436	393172
A5	6	265454	373001
A6	6	200207	318699
A7	6	270373	389508
A8	6	242085	387026
A9	6	250899	386290
A10	6	401708	516611
A11	6
A12	6
B1	6
B2	6	254598	378605
B3	6	204453	323798
B4	6	282485	391021
B5	6	260730	368959
B6	6	210683	319738
B7	6	257004	377296
B8	6	249611	381034
B9	6	223002	342217
B10	6	389838	486242
B11	6
B12	6
C1	6
C2	6	257980	392570
C3	6	225043	357372
C4	6	272304	389574
C5	6	286288	399811
C6	6	219963	348244
C7	6	270287	410791
C8	6	238093	384539
C9	6	224912	340634
C10	6	358145	452382
C11	6
C12	6
D1	6
D2	6	303433	412126
D3	6	247738	368470
D4	6	304699	415668
D5	6	318242	459895
D6	6	239630	378939
D7	6	303741	458536
D8	6	238288	393254
D9	6	246983	365961
D10	6	391879	509249
D11	6
D12	6
E1	6
E2	6	338372	517550
E3	6	292999	414639
E4	6	380660	486548
E5	6	314011	474404
E6	6	229029	375603
E7	6	289884	462172
E8	6	304886	481144
E9	6	331883	430511
E10	6	418359	550361
E11	6
E12	6
F1	6
F2	6	322676	480359
F3	6	287274	442796
F4	6	364879	519091
F5	6	380937	584464
F6	6	246907	408858
F7	6	313606	508749
F8	6	360219	704323
F9	6	316018	609184
F10	6	468986	833426
F11	6
F12	6
G1	6
G2	6	351873	508756
G3	6	333099	512879
G4	6	392432	543354
G5	6	387244	560391
G6	6	272370	426427
G7	6	316027	499484
G8	6	301066	475936
G9	6	300138	454087
G10	6	420192	564935
G11	6
G12	6
H1	6
H2	6	358484	498589
H3	6	325358	488902
H4	6	406796	566492
H5	6	398078	588629
H6	6	279749	414590
H7	6	332303	495561
H8	6	359251	522040
H9	6	303993	459434
H10	6	467479	633749
H11	6
H12	6
A1	7
A2	7	247151	351242
A3	7	212838	324754
A4	7	277476	393086
A5	7	266620	373268
A6	7	201202	318442
A7	7	271088	389619
A8	7	242753	387138
A9	7	251489	385734
A10	7	403252	516795
A11	7
A12	7
B1	7
B2	7	255064	378750
B3	7	204874	323468
B4	7	283097	390735
B5	7	261880	369326
B6	7	211578	319955
B7	7	257817	377134
B8	7	249720	381187
B9	7	223959	343009
B10	7	390819	486377
B11	7
B12	7
C1	7
C2	7	259492	393020
C3	7	225553	357134
C4	7	273527	389354
C5	7	287137	400389
C6	7	220545	348169
C7	7	271421	410846
C8	7	238535	384251
C9	7	225064	340612
C10	7	358399	452646
C11	7
C12	7
D1	7
D2	7	305213	412352
D3	7	248380	368163
D4	7	305623	416144
D5	7	319158	459966
D6	7	240460	378808
D7	7	304776	458557
D8	7	239192	393457
D9	7	247875	366529
D10	7	392813	508978
D11	7
D12	7
E1	7
E2	7	339821	518143
E3	7	294134	415729
E4	7	382319	486095
E5	7	315207	474918
E6	7	229709	375859
E7	7	290671	461904
E8	7	306030	481079
E9	7	334584	431051
E10	7	419683	550136
E11	7
E12	7
F1	7
F2	7	324025	480750
F3	7	288442	443223
F4	7	366793	519000
F5	7	381903	584908
F6	7	247563	408342
F7	7	314038	508802
F8	7	361742	704664
F9	7	316918	609310
F10	7	469832	833766
F11	7
F12	7
G1	7
G2	7	353755	510037
G3	7	334861	513184
G4	7	394243	543657
G5	7	387713	560264
G6	7	272742	426844
G7	7	316734	499640
G8	7	302324	475604
G9	7	301091	454148
G10	7	421669	565005
G11	7
G12	7
H1	7
H2	7	359874	497438
H3	7	326463	488973
H4	7	408106	566588
H5	7	399059	588364
H6	7	280356	414509
H7	7	333038	495029
H8	7	359979	521987
H9	7	304335	459392
H10	7	467293	633193
H11	7
H12	7
A1	8
A2	8	248232	351006
A3	8	213664	324010
A4	8	278706	393088
A5	8	267395	373110
A6	8	201295	318598
A7	8	271302	389478
A8	8	242892	387152
A9	8	251852	385737
A10	8	404132	516225
A11	8
A12	8
B1	8
B2	8	255899	379672
B3	8	205516	323771
B4	8	284346	391203
B5	8	262637	369338
B6	8	212065	319981
B7	8	258053	377968
B8	8	250079	381003
B9	8	225479	343821
B10	8	391846	486702
B11	8
B12	8
C1	8
C2	8	260651	394366
C3	8	226380	357721
C4	8	274768	389571
C5	8	288275	400394
C6	8	221290	348599
C7	8	272506	411615
C8	8	239011	384698
C9	8	225416	340965
C10	8	359724	453530
C11	8
C12	8
D1	8
D2	8	305858	413000
D3	8	249157	369060
D4	8	306502	416324
D5	8	321049	460131
D6	8	241281	379078
D7	8	305619	458785
D8	8	240076	393742
D9	8	248851	366217
D10	8	393858	509910
D11	8
D12	8
E1	8
E2	8	341349	518847
E3	8	295449	415134
E4	8	382714	487000
E5	8	316042	475568
E6	8	230391	376456
E7	8	291699	461942
E8	8	306892	481632
E9	8	337345	431416
E10	8	421048	550418
E11	8
E12	8
F1	8
F2	8	324896	481153
F3	8	288835	443631
F4	8	367312	519779
F5	8	383220	586087
F6	8	248263	408593
F7	8	314753	509150
F8	8	362727	705060
F9	8	318564	609633
F10	8	471407	835007
F11	8
F12	8
G1	8
G2	8	354603	510108
G3	8	336044	513295
G4	8	394952	544513
G5	8	388566	560394
G6	8	273388	427232
G7	8	317543	499650
G8	8	302691	475605
G9	8	302173	454235
G10	8	422236	565833
G11	8
G12	8
H1	8
H2	8	360984	496702
H3	8	326809	488373
H4	8	409110	567406
H5	8	399559	587898
H6	8	280633	413389
H7	8	333395	494793
H8	8	360390	521439
H9	8	304900	458832
H10	8	468339	632749
H11	8
H12	8
A1	9
A2	9	249117	350728
A3	9	214418	324244
A4	9	279769	393241
A5	9	267888	372988
A6	9	201942	318283
A7	9	272782	389531
A8	9	243582	386627
A9	9	252311	385736
A10	9	405094	515838
A11	9
A12	9
B1	9
B2	9	256559	379464
B3	9	206403	323501
B4	9	285106	391432
B5	9	263715	369140
B6	9	213038	319904
B7	9	259086	377644
B8	9	250579	381023
B9	9	226586	344602
B10	9	392692	487111
B11	9
B12	9
C1	9
C2	9	261440	393802
C3	9	226944	357467
C4	9	275690	389843
C5	9	288809	400153
C6	9	221906	348499
C7	9	272887	411388
C8	9	239568	384546
C9	9	226499	340981
C10	9	360804	453282
C11	9
C12	9
D1	9
D2	9	307503	413204
D3	9	249725	368232
D4	9	307543	416382
D5	9	322403	461118
D6	9	242184	378721
D7	9	307161	458856
D8	9	240325	393869
D9	9	249213	366624
D10	9	394597	510119
D11	9
D12	9
E1	9
E2	9	342278	519167
E3	9	296261	416149
E4	9	383863	486342
E5	9	317361	475453
E6	9	231009	376148
E7	9	292177	462412
E8	9	307688	481726
E9	9	340173	431775
E10	9	421715	551453
E11	9
E12	9
F1	9
F2	9	325916	481558
F3	9	290114	443836
F4	9	368288	519706
F5	9	383900	586142
F6	9	249178	408778
F7	9	315658	508972
F8	9	363485	704986
F9	9	319483	610276
F10	9	473823	836519
F11	9
F12	9
G1	9
G2	9	355954	510542
G3	9	336449	513693
G4	9	395727	544203
G5	9	389704	560552
G6	9	274297	427283
G7	9	318466	499548
G8	9	303578	475626
G9	9	302657	454600
G10	9	423144	565666
G11	9
G12	9
H1	9
H2	9	362322	496357
H3	9	327583	488793
H4	9	410057	564456
H5	9	400256	587677
H6	9	281261	414099
H7	9	333910	493598
H8	9	361666	521622
H9	9	305721	459305
H10	9	468628	632832
H11	9
H12	9
A1	10
A2	10	249731	350386
A3	10	214921	324204
A4	10	280662	393478
A5	10	269421	373039
A6	10	202214	318425
A7	10	272841	389535
A8	10	243923	386325
A9	10	252820	385627
A10	10	405602	516176
A11	10
A12	10
B1	10
B2	10	257674	379728
B3	10	206500	323458
B4	10	285534	391498
B5	10	263916	369790
B6	10	213172	319910
B7	10	259549	377870
B8	10	251270	381039
B9	10	226829	345690
B10	10	393166	486657
B11	10
B12	10
C1	10
C2	10	261625	394684
C3	10	227354	357461
C4	10	276004	389689
C5	10	290275	399953
C6	10	222402	348360
C7	10	273845	411669
C8	10	240395	384206
C9	10	226825	341447
C10	10	361200	453759
C11	10
C12	10
D1	10
D2	10	308417	413785
D3	10	249830	368710
D4	10	308198	416322
D5	10	323266	461268
D6	10	242713	379152
D7	10	308272	458836
D8	10	241038	393857
D9	10	250030	367133
D10	10	395048	510688
D11	10
D12	10
E1	10
E2	10	343089	519685
E3	10	296864	415981
E4	10	384474	486025
E5	10	317937	475455
E6	10	231557	376460
E7	10	292899	462494
E8	10	308546	481775
E9	10	342181	432123
E10	10	422195	550939
E11	10
E12	10
F1	10
F2	10	326623	481890
F3	10	290471	443460
F4	10	369298	519395
F5	10	385245	586031
F6	10	249466	409513
F7	10	315935	509051
F8	10	364959	706100
F9	10	320186	610568
F10	10	475408	838022
F11	10
F12	10
G1	10
G2	10	357434	510927
G3	10	337555	513467
G4	10	396625	544400
G5	10	390174	560788
G6	10	274587	427590
G7	10	318769	499743
G8	10	303576	475806
G9	10	303399	454653
G10	10	424390	566090
G11	10
G12	10
H1	10
H2	10	362478	495648
H3	10	328157	488595
H4	10	411043	565426
H5	10	401235	586415
H6	10	281860	413759
H7	10	334381	494374
H8	10	362025	521517
H9	10	306310	459134
H10	10	469372	632902
H11	10
H12	10
A1	11
A2	11	250548	350473
A3	11	215185	324246
A4	11	281275	393371
A5	11	269355	373048
A6	11	202635	318374
A7	11	273104	389178
A8	11	244644	386576
A9	11	253487	385445
A10	11	405549	515864
A11	11
A12	11
B1	11
B2	11	258001	380027
B3	11	206910	323664
B4	11	286510	391453
B5	11	265195	369703
B6	11	213653	319727
B7	11	260295	377606
B8	11	251489	381063
B9	11	228155	347185
B10	11	394078	487325
B11	11
B12	11
C1	11
C2	11	263359	394699
C3	11	228156	357456
C4	11	277092	390048
C5	11	290561	400381
C6	11	222882	348447
C7	11	274475	412148
C8	11	240707	384723
C9	11	226780	341235
C10	11	361734	454382
C11	11
C12	11
D1	11
D2	11	309041	414700
D3	11	250863	369245
D4	11	308990	416322
D5	11	324746	460874
D6	11	243599	379149
D7	11	308728	459024
D8	11	241371	394086
D9	11	250136	366931
D10	11	396296	511020
D11	11
D12	11
E1	11
E2	11	343911	520342
E3	11	297693	416396
E4	11	385303	486700
E5	11	318423	475686
E6	11	231774	376464
E7	11	293625	462622
E8	11	308981	481596
E9	11	344027	432366
E10	11	422762	551978
E11	11
E12	11
F1	11
F2	11	327122	482412
F3	11	291380	443650
F4	11	369966	519817
F5	11	385196	586293
F6	11	249921	408741
F7	11	316533	508778
F8	11	365988	706074
F9	11	321102	610694
F10	11	476048	836589
F11	11
F12	11
G1	11
G2	11	358650	511480
G3	11	338928	514741
G4	11	397894	544106
G5	11	391210	560413
G6	11	274985	427050
G7	11	318812	499213
G8	11	304620	475583
G9	11	303560	454124
G10	11	424909	566483
G11	11
G12	11
H1	11
H2	11	363364	495548
H3	11	328777	488532
H4	11	411370	566474
H5	11	400985	586669
H6	11	281942	413408
H7	11	334646	493397
H8	11	362939	521645
H9	11	306555	459042
H10	11	470249	633271
H11	11
H12	11
A1	12
A2	12	250549	350563
A3	12	215596	323766
A4	12	281624	393344
A5	12	269783	372826
A6	12	202981	318450
A7	12	273845	389398
A8	12	244600	386238
A9	12	253765	385135
A10	12	406759	515895
A11	12
A12	12
B1	12
B2	12	258757	379409
B3	12	207290	323666
B4	12	286649	391512
B5	12	265730	369786
B6	12	213382	320134
B7	12	260777	378040
B8	12	251603	381127
B9	12	228975	347486
B10	12	394578	487093
B11	12
B12	12
C1	12
C2	12	263705	394920
C3	12	229014	356990
C4	12	277356	390006
C5	12	291000	400545
C6	12	223309	348331
C7	12	274658	411754
C8	12	240616	384777
C9	12	227789	341055
C10	12	362026	453980
C11	12
C12	12
D1	12
D2	12	310077	414309
D3	12	251361	368972
D4	12	309356	416471
D5	12	324796	460924
D6	12	244164	379254
D7	12	310318	459020
D8	12	241683	394488
D9	12	250785	366729
D10	12	396399	511511
D11	12
D12	12
E1	12
E2	12	344665	520489
E3	12	298623	416020
E4	12	386013	486073
E5	12	318794	476666
E6	12	232034	376032
E7	12	293767	461995
E8	12	309247	481804
E9	12	346757	432356
E10	12	423344	550866
E11	12
E12	12
F1	12
F2	12	327450	481874
F3	12	292508	444049
F4	12	370929	519585
F5	12	386615	586358
F6	12	250142	409386
F7	12	317093	508754
F8	12	366654	705183
F9	12	321424	610441
F10	12	477608	837852
F11	12
F12	12
G1	12
G2	12	358955	511660
G3	12	339541	514046
G4	12	397952	544314
G5	12	391470	560911
G6	12	275077	427563
G7	12	319608	500040
G8	12	304943	475513
G9	12	303740	454189
G10	12	425310	566210
G11	12
G12	12
H1	12
H2	12	362924	495367
H3	12	329959	488891
H4	12	411850	565996
H5	12	401778	586423
H6	12	282811	413089
H7	12	334903	492994
H8	12	362778	521584
H9	12	306885	459202
H10	12	470048	632684
H11	12
H12	12
A1	13
A2	13	251416	350315
A3	13	215558	324066
A4	13	282526	393623
A5	13	270381	372757
A6	13	203139	318242
A7	13	274423	389376
A8	13	245359	386025
A9	13	253782	384786
A10	13	406553	515485
A11	13
A12	13
B1	13
B2	13	259250	380579
B3	13	207966	324171
B4	13	287745	391311
B5	13	265796	369319
B6	13	214147	319732
B7	13	260568	377615
B8	13	251929	380756
B9	13	229929	349075
B10	13	395505	486990
B11	13
B12	13
C1	13
C2	13	263556	394885
C3	13	229333	357618
C4	13	278520	390231
C5	13	291492	400819
C6	13	223927	348014
C7	13	275850	411833
C8	13	241218	384646
C9	13	227727	341154
C10	13	362491	454490
C11	13
C12	13
D1	13
D2	13	310738	414133
D3	13	251202	368645
D4	13	310878	416124
D5	13	325890	461035
D6	13	244587	379116
D7	13	310988	458957
D8	13	241805	394438
D9	13	251391	367118
D10	13	397165	510863
D11	13
D12	13
E1	13
E2	13	345944	520778
E3	13	298930	416099
E4	13	386672	486137
E5	13	319120	476295
E6	13	232882	376549
E7	13	294170	462398
E8	13	310278	481491
E9	13	349022	432327
E10	13	423968	552248
E11	13
E12	13
F1	13
F2	13	328060	482198
F3	13	292665	444451
F4	13	370775	519798
F5	13	386460	586153
F6	13	250436	409151
F7	13	317359	509047
F8	13	367499	706556
F9	13	322188	610754
F10	13	479370	839502
F11	13
F12	13
G1	13
G2	13	360834	511291
G3	13	340649	514693
G4	13	398629	544393
G5	13	391798	560286
G6	13	275239	427824
G7	13	320779	499915
G8	13	305220	474976
G9	13	304527	454030
G10	13	425721	566064
G11	13
G12	13
H1	13
H2	13	364129	494948
H3	13	330309	489003
H4	13	412162	565758
H5	13	402203	585723
H6	13	282860	413472
H7	13	335304	493408
H8	13	363734	521601
H9	13	307318	459126
H10	13	470071	632095
H11	13
H12	13
A1	14
A2	14	251739	350911
A3	14	216078	323801
A4	14	282174	393267
A5	14	270938	372963
A6	14	203682	318280
A7	14	274841	389392
A8	14	245514	386103
A9	14	254470	385197
A10	14	407316	515675
A11	14
A12	14
B1	14
B2	14	259452	380129
B3	14	208267	323585
B4	14	287931	391581
B5	14	266495	369608
B6	14	214819	319934
B7	14	261720	377644
B8	14	251809	380699
B9	14	231507	349367
B10	14	395298	487535
B11	14
B12	14
C1	14
C2	14	264826	395371
C3	14	229425	357155
C4	14	278998	390413
C5	14	291976	400645
C6	14	224449	347901
C7	14	275847	412205
C8	14	241165	384203
C9	14	228092	341413
C10	14	362867	454625
C11	14
C12	14
D1	14
D2	14	311892	414467
D3	14	251679	368754
D4	14	311127	416320
D5	14	327089	461376
D6	14	245085	379288
D7	14	311515	459240
D8	14	242084	394741
D9	14	252452	367400
D10	14	397694	511811
D11	14
D12	14
E1	14
E2	14	346403	520678
E3	14	299578	415904
E4	14	387747	485705
E5	14	319829	476065
E6	14	233567	376226
E7	14	295073	462261
E8	14	310794	481884
E9	14	350904	432282
E10	14	424895	552939
E11	14
E12	14
F1	14
F2	14	328163	482233
F3	14	293204	443776
F4	14	371676	519529
F5	14	387575	585889
F6	14	250867	409037
F7	14	317942	509143
F8	14	368377	706449
F9	14	323020	611321
F10	14	479798	838444
F11	14
F12	14
G1	14
G2	14	361757	511517
G3	14	340842	514549
G4	14	399531	544013
G5	14	392141	560692
G6	14	275522	427787
G7	14	320485	500014
G8	14	305321	475725
G9	14	304704	454494
G10	14	427151	566650
G11	14
G12	14
H1	14
H2	14	364558	494807
H3	14	331916	488752
H4	14	412812	565105
H5	14	402866	586112
H6	14	283139	413373
H7	14	335726	492649
H8	14	363970	521762
H9	14	307952	459222
H10	14	471400	631768
H11	14
H12	14
A1	15
A2	15	252276	350744
A3	15	216332	324220
A4	15	282626	393553
A5	15	271310	373074
A6	15	204041	317975
A7	15	275112	389328
A8	15	245993	386065
A9	15	254761	384805
A10	15	407961	516085
A11	15
A12	15
B1	15
B2	15	260212	380590
B3	15	208724	323540
B4	15	288782	391915
B5	15	267084	369912
B6	15	214887	319724
B7	15	261938	377877
B8	15	252057	380750
B9	15	232073	350735
B10	15	396128	487564
B11	15
B12	15
C1	15
C2	15	265441	395519
C3	15	230142	357623
C4	15	279649	390043
C5	15	292963	400902
C6	15	224364	348426
C7	15	276486	412040
C8	15	241975	384079
C9	15	228372	341176
C10	15	363275	455194
C11	15
C12	15
D1	15
D2	15	312609	414622
D3	15	252379	369057
D4	15	312126	416179
D5	15	327169	461783
D6	15	245518	379607
D7	15	311831	459496
D8	15	242085	394791
D9	15	252108	366983
D10	15	398436	511498
D11	15
D12	15
E1	15
E2	15	347830	521073
E3	15	299836	415869
E4	15	388363	485920
E5	15	320525	476480
E6	15	233297	376177
E7	15	294924	462924
E8	15	311112	482127
E9	15	352801	432208
E10	15	425485	551935
E11	15
E12	15
F1	15
F2	15	328621	482766
F3	15	293904	443720
F4	15	371455	519789
F5	15	387717	586041
F6	15	250898	409188
F7	15	318187	508875
F8	15	369136	707039
F9	15	323549	611616
F10	15	480388	838588
F11	15
F12	15
G1	15
G2	15	362338	512231
G3	15	341529	514667
G4	15	400133	544140
G5	15	392776	560778
G6	15	276168	427283
G7	15	321140	499723
G8	15	306118	475547
G9	15	305276	454595
G10	15	427095	566281
G11	15
G12	15
H1	15
H2	15	364833	494712
H3	15	331630	488418
H4	15	413606	567244
H5	15	402338	585476
H6	15	283776	412871
H7	15	335030	492420
H8	15	364661	521796
H9	15	308386	459432
H10	15	472149	632143
H11	15
H12	15
A1	16
A2	16	252375	350440
A3	16	216502	324320
A4	16	283437	394038
A5	16	271051	372906
A6	16	203605	317792
A7	16	275378	388816
A8	16	246371	385803
A9	16	255215	384789
A10	16	408373	515421
A11	16
A12	16
B1	16
B2	16	260907	380946
B3	16	208672	323716
B4	16	288842	391849
B5	16	267324	369641
B6	16	215561	320262
B7	16	262400	377939
B8	16	252020	380572
B9	16	232404	351459
B10	16	396339	487691
B11	16
B12	16
C1	16
C2	16	265905	395461
C3	16	230589	357772
C4	16	279933	390030
C5	16	293914	400684
C6	16	224992	348184
C7	16	277394	412414
C8	16	242092	384290
C9	16	228638	341117
C10	16	362933	454610
C11	16
C12	16
D1	16
D2	16	313617	414899
D3	16	252789	368859
D4	16	311956	415857
D5	16	327915	461192
D6	16	246214	378976
D7	16	312466	458950
D8	16	242648	394752
D9	16	252519	367363
D10	16	398733	511132
D11	16
D12	16
E1	16
E2	16	348605	520833
E3	16	300973	415939
E4	16	388934	485781
E5	16	320782	476640
E6	16	234151	375894
E7	16	295509	463013
E8	16	311199	481812
E9	16	353977	432628
E10	16	426153	550922
E11	16
E12	16
F1	16
F2	16	329033	482456
F3	16	294923	444383
F4	16	372735	519135
F5	16	387574	586599
F6	16	251395	409312
F7	16	318173	508825
F8	16	369929	706073
F9	16	324017	611084
F10	16	481073	839140
F11	16
F12	16
G1	16
G2	16	363105	512664
G3	16	341701	514280
G4	16	400503	544352
G5	16	393418	560027
G6	16	276109	427252
G7	16	321023	500247
G8	16	306573	475128
G9	16	305644	454459
G10	16	427891	566352
G11	16
G12	16
H1	16
H2	16	365422	495016
H3	16	331721	488767
H4	16	413729	564989
H5	16	402713	584972
H6	16	283862	413066
H7	16	335864	492400
H8	16	364414	521783
H9	16	308726	459150
H10	16	471800	631389
H11	16
H12	16
A1	17
A2	17	253363	350786
A3	17	217009	324128
A4	17	283948	393581
A5	17	271597	372960
A6	17	204147	317755
A7	17	275918	389224
A8	17	246918	385423
A9	17	255379	384086
A10	17	407860	515321
A11	17
A12	17
B1	17
B2	17	260948	381312
B3	17	209441	324001
B4	17	289784	391977
B5	17	267915	369369
B6	17	215498	320044
B7	17	262514	378099
B8	17	252068	380856
B9	17	233496	352696
B10	17	397570	487386
B11	17
B12	17
C1	17
C2	17	266147	395688
C3	17	230784	357453
C4	17	281062	390371
C5	17	294006	400664
C6	17	225712	348192
C7	17	277615	412084
C8	17	242465	384453
C9	17	229006	341561
C10	17	363626	455174
C11	17
C12	17
D1	17
D2	17	314532	414942
D3	17	253397	368441
D4	17	312935	416192
D5	17	328568	461846
D6	17	246475	379327
D7	17	313568	459228
D8	17	242679	394932
D9	17	252718	367093
D10	17	398979	511973
D11	17
D12	17
E1	17
E2	17	349552	520913
E3	17	301804	415698
E4	17	390204	485271
E5	17	320904	476780
E6	17	234189	375954
E7	17	295467	462616
E8	17	312539	481558
E9	17	355713	432603
E10	17	426080	551190
E11	17
E12	17
F1	17
F2	17	330376	482732
F3	17	295659	444275
F4	17	373225	519122
F5	17	388984	586303
F6	17	251731	409206
F7	17	318954	508740
F8	17	370289	707071
F9	17	324626	611420
F10	17	482308	838712
F11	17
F12	17
G1	17
G2	17	364358	512106
G3	17	342783	514893
G4	17	400774	544198
G5	17	393756	560392
G6	17	276301	427183
G7	17	321313	499646
G8	17	306733	475480
G9	17	306198	454218
G10	17	428494	566618
G11	17
G12	17
H1	17
H2	17	365608	494507
H3	17	332045	488790
H4	17	414685	565703
H5	17	403074	585163
H6	17	284261	413090
H7	17	336478	492523
H8	17	366143	521770
H9	17	309537	458674
H10	17	472649	631842
H11	17
H12	17
A1	18
A2	18	253747	350757
A3	18	217600	324296
A4	18	284141	394097
A5	18	271924	373046
A6	18	204482	317538
A7	18	276059	389122
A8	18	247115	385465
A9	18	255310	384511
A10	18	409098	515532
A11	18
A12	18
B1	18
B2	18	261660	380989
B3	18	208893	324020
B4	18	289785	391592
B5	18	268019	369327
B6	18	215843	319856
B7	18	263309	377806
B8	18	252553	380768
B9	18	234547	353817
B10	18	397468	487630
B11	18
B12	18
C1	18
C2	18	266725	396056
C3	18	230975	357203
C4	18	281306	390168
C5	18	295041	400744
C6	18	226447	348064
C7	18	278428	412401
C8	18	242761	384005
C9	18	229261	341393
C10	18	364178	455097
C11	18
C12	18
D1	18
D2	18	315653	414932
D3	18	254476	368428
D4	18	314454	415861
D5	18	329221	461672
D6	18	246834	379422
D7	18	313692	458818
D8	18	242613	395082
D9	18	253068	367319
D10	18	399090	512012
D11	18
D12	18
E1	18
E2	18	350496	521711
E3	18	303131	416032
E4	18	391389	485044
E5	18	320756	476890
E6	18	234454	376283
E7	18	295752	463213
E8	18	312189	481500
E9	18	357376	432634
E10	18	426277	551342
E11	18
E12	18
F1	18
F2	18	330406	482894
F3	18	296456	444310
F4	18	374034	519486
F5	18	389083	586615
F6	18	252106	409046
F7	18	319095	509090
F8	18	370350	705950
F9	18	325489	610908
F10	18	483309	839146
F11	18
F12	18
G1	18
G2	18	365233	512463
G3	18	343641	514960
G4	18	402313	544022
G5	18	393627	560270
G6	18	277008	427474
G7	18	321553	499630
G8	18	307167	475346
G9	18	306000	454429
G10	18	428267	566799
G11	18
G12	18
H1	18
H2	18	366312	494471
H3	18	332782	488729
H4	18	415316	565879
H5	18	403553	584820
H6	18	284064	412552
H7	18	336371	491850
H8	18	365624	522012
H9	18	308878	459098
H10	18	472656	631931
H11	18
H12	18
A1	19
A2	19	253675	350876
A3	19	217758	324138
A4	19	284661	393756
A5	19	272691	372932
A6	19	204662	317908
A7	19	275839	388985
A8	19	247159	385571
A9	19	255731	384018
A10	19	409160	515055
A11	19
A12	19
B1	19
B2	19	262018	381054
B3	19	209705	323174
B4	19	290215	391884
B5	19	268970	369545
B6	19	216048	319717
B7	19	263557	378276
B8	19	251973	380568
B9	19	235110	354775
B10	19	397602	487261
B11	19
B12	19
C1	19
C2	19	267141	396527
C3	19	231326	357406
C4	19	281478	390707
C5	19	296029	401278
C6	19	227462	347792
C7	19	279203	412497
C8	19	242819	384556
C9	19	229186	340930
C10	19	364301	455046
C11	19
C12	19
D1	19
D2	19	317767	414983
D3	19	256095	368477
D4	19	316066	415791
D5	19	329802	461976
D6	19	247374	378783
D7	19	313789	459224
D8	19	242600	394733
D9	19	253859	367414
D10	19	399384	511808
D11	19
D12	19
E1	19
E2	19	351561	522070
E3	19	305191	415939
E4	19	393684	485339
E5	19	321554	476459
E6	19	234617	376352
E7	19	296205	462733
E8	19	312765	481549
E9	19	358658	432512
E10	19	426434	550831
E11	19
E12	19
F1	19
F2	19	331319	483110
F3	19	296916	443997
F4	19	374365	519715
F5	19	388952	585938
F6	19	252074	408977
F7	19	319606	509366
F8	19	371298	707144
F9	19	325969	611803
F10	19	484283	839532
F11	19
F12	19
G1	19
G2	19	366282	512782
G3	19	345191	515089
G4	19	402864	544056
G5	19	394391	560392
G6	19	277474	427228
G7	19	321621	499993
G8	19	307044	475474
G9	19	306308	454555
G10	19	428237	567276
G11	19
G12	19
H1	19
H2	19	367437	495298
H3	19	333514	488980
H4	19	416595	565706
H5	19	404128	584522
H6	19	284305	412420
H7	19	336672	491898
H8	19	366202	522404
H9	19	309976	458783
H10	19	473035	631497
H11	19
H12	19
A1	20
A2	20	254111	350691
A3	20	217646	324034
A4	20	284706	394317
A5	20	272864	372838
A6	20	205111	317684
A7	20	276635	389151
A8	20	247888	385222
A9	20	256917	384256
A10	20	410260	514582
A11	20
A12	20
B1	20
B2	20	262489	380788
B3	20	209827	323707
B4	20	290623	391835
B5	20	269150	369717
B6	20	216944	319980
B7	20	263733	378210
B8	20	252743	380585
B9	20	236344	356153
B10	20	398612	487599
B11	20
B12	20
C1	20
C2	20	267994	396362
C3	20	231868	357516
C4	20	281754	390696
C5	20	298052	400951
C6	20	228489	347900
C7	20	281708	412395
C8	20	243174	384239
C9	20	229921	341409
C10	20	364968	455083
C11	20
C12	20
D1	20
D2	20	321412	415085
D3	20	259034	368212
D4	20	319548	415811
D5	20	330614	461931
D6	20	248280	379017
D7	20	314625	459321
D8	20	243228	394999
D9	20	253891	368058
D10	20	399367	512347
D11	20
D12	20
E1	20
E2	20	354255	521949
E3	20	308617	416604
E4	20	398567	484691
E5	20	321904	476498
E6	20	235356	376285
E7	20	297180	462842
E8	20	313294	482184
E9	20	359738	432617
E10	20	427243	552490
E11	20
E12	20
F1	20
F2	20	333157	483136
F3	20	299270	444377
F4	20	377109	519368
F5	20	389745	586501
F6	20	252172	409612
F7	20	319780	508910
F8	20	372117	707715
F9	20	326951	612697
F10	20	484059	839815
F11	20
F12	20
G1	20
G2	20	368777	513256
G3	20	347419	514945
G4	20	404765	544135
G5	20	394548	559982
G6	20	276666	427395
G7	20	321777	499584
G8	20	308159	475644
G9	20	306216	454799
G10	20	429386	566905
G11	20
G12	20
H1	20
H2	20	367611	495248
H3	20	334164	489343
H4	20	416560	565833
H5	20	404080	584576
H6	20	285162	412779
H7	20	337191	491948
H8	20	366666	522003
H9	20	310209	458958
H10	20	473140	631781
H11	20
H12	20
A1	21
A2	21	254426	350542
A3	21	217611	324034
A4	21	285035	393976
A5	21	272798	372458
A6	21	205210	317722
A7	21	276544	389028
A8	21	248223	385593
A9	21	257319	384327
A10	21	411234	515142
A11	21
A12	21
B1	21
B2	21	262601	381167
B3	21	210276	324183
B4	21	290823	392275
B5	21	269434	369636
B6	21	217222	320183
B7	21	264679	378414
B8	21	252796	380935
B9	21	237242	357300
B10	21	398946	488059
B11	21
B12	21
C1	21
C2	21	268060	396418
C3	21	232089	357777
C4	21	282395	390818
C5	21	301243	400878
C6	21	231619	347924
C7	21	284093	412965
C8	21	243740	384604
C9	21	230179	341201
C10	21	365339	455635
C11	21
C12	21
D1	21
D2	21	328781	415447
D3	21	264826	368846
D4	21	325340	415837
D5	21	331043	462086
D6	21	248485	379130
D7	21	314990	459198
D8	21	243053	394824
D9	21	254097	367587
D10	21	399891	512400
D11	21
D12	21
E1	21
E2	21	358182	522197
E3	21	315802	416574
E4	21	405876	485032
E5	21	322052	476675
E6	21	235087	376782
E7	21	297101	462870
E8	21	313361	481311
E9	21	361274	432904
E10	21	427903	552882
E11	21
E12	21
F1	21
F2	21	336309	483143
F3	21	302169	444212
F4	21	380015	519318
F5	21	390015	585992
F6	21	252458	409315
F7	21	319621	509035
F8	21	372698	706441
F9	21	327257	611536
F10	21	485448	840426
F11	21
F12	21
G1	21
[truncated: 10,967 more rows]

## Sheet: Amplification Data
Block Type	96alum
Chemistry	SYBR_GREEN
Experiment File Name	D:\HAIFENG\1117CBF34Untitled.eds
Experiment Run End Time	2013-01-10 03:05:40 AM CST
Instrument Type	sds7500
Passive Reference	ROX
Well	Cycle	Target Name	Rn	ΔRn
A1	1
A1	2
A1	3
A1	4
A1	5
A1	6
A1	7
A1	8
A1	9
A1	10
A1	11
A1	12
A1	13
A1	14
A1	15
A1	16
A1	17
A1	18
A1	19
A1	20
A1	21
A1	22
A1	23
A1	24
A1	25
A1	26
A1	27
A1	28
A1	29
A1	30
A1	31
A1	32
A1	33
A1	34
A1	35
A1	36
A1	37
A1	38
A1	39
A1	40
A2	1	CBF3	0.690153	-0.0110585
A2	2	CBF3	0.690766	-0.0115175
A2	3	CBF3	0.694057	-0.00929903
A2	4	CBF3	0.698146	-0.00628237
A2	5	CBF3	0.699887	-0.00561443
A2	6	CBF3	0.703738	-0.00283524
A2	7	CBF3	0.70365	-0.00399633
A2	8	CBF3	0.707203	-0.00151552
A2	9	CBF3	0.710283	0.000492454
A2	10	CBF3	0.712732	0.00186814
A2	11	CBF3	0.714884	0.00294854
A2	12	CBF3	0.714705	0.00169709
A2	13	CBF3	0.717685	0.00360457
A2	14	CBF3	0.717387	0.00223331
A2	15	CBF3	0.71926	0.0030347
A2	16	CBF3	0.720167	0.00286871
A2	17	CBF3	0.722274	0.00390388
A2	18	CBF3	0.723426	0.0039834
A2	19	CBF3	0.722974	0.00245842
A2	20	CBF3	0.724602	0.00301394
A2	21	CBF3	0.725807	0.0031461
A2	22	CBF3	0.727311	0.00357842
A2	23	CBF3	0.727882	0.00307697
A2	24	CBF3	0.728205	0.00232739
A2	25	CBF3	0.730473	0.00352319
A2	26	CBF3	0.729663	0.00164076
A2	27	CBF3	0.731098	0.00200239
A2	28	CBF3	0.730851	0.000683471
A2	29	CBF3	0.733112	0.001872
A2	30	CBF3	0.731773	-0.000539421
A2	31	CBF3	0.732782	-0.000602891
A2	32	CBF3	0.732083	-0.00237427
A2	33	CBF3	0.73449	-0.00104031
A2	34	CBF3	0.735768	-0.000833953
A2	35	CBF3	0.735218	-0.00245644
A2	36	CBF3	0.735004	-0.0037433
A2	37	CBF3	0.735555	-0.00426441
A2	38	CBF3	0.73696	-0.00393229
A2	39	CBF3	0.737337	-0.00462763
A2	40	CBF3	0.737526	-0.00551155
A3	1	CBF3	0.644697	-0.00998404
A3	2	CBF3	0.647632	-0.00781291
A3	3	CBF3	0.649063	-0.00714614
A3	4	CBF3	0.652463	-0.00451057
A3	5	CBF3	0.652579	-0.00515898
A3	6	CBF3	0.65635	-0.00215112
A3	7	CBF3	0.655382	-0.00388386
A3	8	CBF3	0.659437	-0.000593174
A3	9	CBF3	0.661286	0.000492436
A3	10	CBF3	0.66292	0.00136186
A3	11	CBF3	0.66365	0.00132768
A3	12	CBF3	0.665901	0.00281473
A3	13	CBF3	0.665168	0.00131749
A3	14	CBF3	0.667318	0.00270333
A3	15	CBF3	0.667239	0.00186019
A3	16	CBF3	0.667559	0.00141599
A3	17	CBF3	0.669518	0.00261085
A3	18	CBF3	0.670991	0.00332042
A3	19	CBF3	0.671807	0.00337213
A3	20	CBF3	0.671678	0.00247886
A3	21	CBF3	0.67157	0.00160712
A3	22	CBF3	0.673437	0.00270965
A3	23	CBF3	0.674543	0.003052
A3	24	CBF3	0.674758	0.00250211
A3	25	CBF3	0.673782	0.000762404
A3	26	CBF3	0.67627	0.00248602
A3	27	CBF3	0.675947	0.00139958
A3	28	CBF3	0.678077	0.00276539
A3	29	CBF3	0.676778	0.00070197
A3	30	CBF3	0.676821	-1.87981e-05
A3	31	CBF3	0.676948	-0.000656179
A3	32	CBF3	0.677793	-0.000575265
A3	33	CBF3	0.678469	-0.000663568
A3	34	CBF3	0.679034	-0.000862557
A3	35	CBF3	0.679135	-0.00152563
A3	36	CBF3	0.679356	-0.00206836
A3	37	CBF3	0.678225	-0.00396328
A3	38	CBF3	0.678342	-0.00461085
A3	39	CBF3	0.679043	-0.00467388
A3	40	CBF3	0.680374	-0.00410701
A4	1	CBF3	0.691453	-0.0131351
A4	2	CBF3	0.694156	-0.0111888
A4	3	CBF3	0.696493	-0.00960772
A4	4	CBF3	0.699041	-0.00781649
A4	5	CBF3	0.701177	-0.00643713
A4	6	CBF3	0.703091	-0.00527968
A4	7	CBF3	0.705893	-0.00323375
A4	8	CBF3	0.709018	-0.000865611
A4	9	CBF3	0.711444	0.000803489
A4	10	CBF3	0.713287	0.00188989
A4	11	CBF3	0.715038	0.00288451
A4	12	CBF3	0.715975	0.0030657
A4	13	CBF3	0.717758	0.0040916
A4	14	CBF3	0.717511	0.00308815
A4	15	CBF3	0.718141	0.00296124
A4	16	CBF3	0.719312	0.00337662
A4	17	CBF3	0.721448	0.0047555
A4	18	CBF3	0.720993	0.00354415
A4	19	CBF3	0.722937	0.00473164
A4	20	CBF3	0.722022	0.00306002
A4	21	CBF3	0.723482	0.00376394
A4	22	CBF3	0.723585	0.00310983
A4	23	CBF3	0.724534	0.00330247
A4	24	CBF3	0.724429	0.00244111
A4	25	CBF3	0.723381	0.000636811
A4	26	CBF3	0.726094	0.0025935
A4	27	CBF3	0.726446	0.00218872
A4	28	CBF3	0.726298	0.00128445
A4	29	CBF3	0.726789	0.00101836
A4	30	CBF3	0.725846	-0.000680734
A4	31	CBF3	0.726928	-0.000355958
A4	32	CBF3	0.727855	-0.000184722
A4	33	CBF3	0.726491	-0.00230523
A4	34	CBF3	0.727749	-0.00180396
A4	35	CBF3	0.727334	-0.00297538
A4	36	CBF3	0.72796	-0.00310622
A4	37	CBF3	0.727506	-0.00431698
A4	38	CBF3	0.728539	-0.00403959
A4	39	CBF3	0.727753	-0.00558258
A4	40	CBF3	0.727678	-0.00641402
A5	1	CBF3	0.692872	-0.0129689
A5	2	CBF3	0.698024	-0.00915282
A5	3	CBF3	0.701644	-0.0068701
A5	4	CBF3	0.705151	-0.00469895
A5	5	CBF3	0.708377	-0.00280998
A5	6	CBF3	0.71167	-0.000853054
A5	7	CBF3	0.714285	0.000425213
A5	8	CBF3	0.716664	0.00146756
A5	9	CBF3	0.71822	0.00168684
A5	10	CBF3	0.722233	0.00436361
A5	11	CBF3	0.722038	0.00283235
A5	12	CBF3	0.723616	0.00307331
A5	13	CBF3	0.725356	0.00347658
A5	14	CBF3	0.726447	0.00323183
A5	15	CBF3	0.727229	0.0026769
A5	16	CBF3	0.726862	0.000973563
A5	17	CBF3	0.728221	0.000995304
A5	18	CBF3	0.728929	0.000367533
A5	19	CBF3	0.731208	0.00130975
A5	20	CBF3	0.731858	0.000623088
A5	21	CBF3	0.732427	-0.000144217
A5	22	CBF3	0.731736	-0.00217139
A5	23	CBF3	0.732797	-0.00244773
A5	24	CBF3	0.732433	-0.00414767
A5	25	CBF3	0.735422	-0.00249574
A5	26	CBF3	0.736926	-0.00232844
A5	27	CBF3	0.742054	0.00146383
A5	28	CBF3	0.749938	0.00801138
A5	29	CBF3	0.765296	0.0220325
A5	30	CBF3	0.792402	0.047802
A5	31	CBF3	0.849906	0.103969
A5	32	CBF3	0.950833	0.20356
A5	33	CBF3	1.1229	0.37429
A5	34	CBF3	1.39449	0.644547
A5	35	CBF3	1.7532	1.00192
A5	36	CBF3	2.13754	1.38492
A5	37	CBF3	2.44901	1.69506
A5	38	CBF3	2.67276	1.91747
A5	39	CBF3	2.8389	2.08227
A5	40	CBF3	2.97259	2.21462
A6	1	CBF3	0.618306	-0.00636096
A6	2	CBF3	0.620077	-0.00561751
A6	3	CBF3	0.622398	-0.00432368
A6	4	CBF3	0.624234	-0.00351502
A6	5	CBF3	0.628126	-0.000651141
A6	6	CBF3	0.6282	-0.0016047
A6	7	CBF3	0.631831	0.000998892
A6	8	CBF3	0.631815	-4.49659e-05
A6	9	CBF3	0.634474	0.00158653
A6	10	CBF3	0.635044	0.00112823
A6	11	CBF3	0.636469	0.00152585
A6	12	CBF3	0.637403	0.00143269
A6	13	CBF3	0.638316	0.00131789
A6	14	CBF3	0.639945	0.00191924
A6	15	CBF3	0.641687	0.00263318
A6	16	CBF3	0.640686	0.000604356
A6	17	CBF3	0.642466	0.00135722
A6	18	CBF3	0.643963	0.00182613
A6	19	CBF3	0.643778	0.000613471
A6	20	CBF3	0.645645	0.0014533
A6	21	CBF3	0.645877	0.000657456
A6	22	CBF3	0.64585	-0.000396951
A6	23	CBF3	0.646487	-0.000787959
A6	24	CBF3	0.647036	-0.00126653
A6	25	CBF3	0.649145	-0.000185061
A6	26	CBF3	0.648212	-0.00214576
A6	27	CBF3	0.648437	-0.00294881
A6	28	CBF3	0.65069	-0.00172251
A6	29	CBF3	0.653979	0.000538653
A6	30	CBF3	0.659896	0.00542796
A6	31	CBF3	0.670526	0.0150304
A6	32	CBF3	0.691525	0.0350019
A6	33	CBF3	0.732854	0.0753026
A6	34	CBF3	0.806103	0.147524
A6	35	CBF3	0.939297	0.27969
A6	36	CBF3	1.16944	0.508811
A6	37	CBF3	1.5096	0.847941
A6	38	CBF3	1.9281	1.26541
A6	39	CBF3	2.32848	1.66476
A6	40	CBF3	2.62941	1.96467
A7	1	CBF3	0.677546	-0.0101723
A7	2	CBF3	0.682061	-0.00686919
A7	3	CBF3	0.683314	-0.00682757
A7	4	CBF3	0.687956	-0.0033967
A7	5	CBF3	0.690573	-0.00199145
A7	6	CBF3	0.694139	0.000363197
A7	7	CBF3	0.695776	0.000789032
A7	8	CBF3	0.696578	0.00037933
A7	9	CBF3	0.700283	0.00287285
A7	10	CBF3	0.700428	0.0018063
A7	11	CBF3	0.701746	0.00191308
A7	12	CBF3	0.703254	0.00220957
A7	13	CBF3	0.704777	0.00252085
A7	14	CBF3	0.70582	0.00235254
A7	15	CBF3	0.706632	0.00195339
A7	16	CBF3	0.708248	0.00235795
A7	17	CBF3	0.708894	0.00179202
A7	18	CBF3	0.709442	0.00112888
A7	19	CBF3	0.709125	-0.000399722
A7	20	CBF3	0.710868	0.000131554
A7	21	CBF3	0.710859	-0.00108794
A7	22	CBF3	0.712223	-0.000936044
A7	23	CBF3	0.71188	-0.00249033
A7	24	CBF3	0.713246	-0.00233612
A7	25	CBF3	0.715051	-0.00174172
A7	26	CBF3	0.717621	-0.000383906
A7	27	CBF3	0.718237	-0.000979039
A7	28	CBF3	0.725053	0.0046259
A7	29	CBF3	0.735188	0.0135486
A7	30	CBF3	0.758757	0.0359063
A7	31	CBF3	0.799631	0.0755692
A7	32	CBF3	0.878004	0.152731
A7	33	CBF3	1.01736	0.290871
A7	34	CBF3	1.24685	0.519154
A7	35	CBF3	1.5856	0.856694
A7	36	CBF3	2.0009	1.27078
A7	37	CBF3	2.39494	1.66361
A7	38	CBF3	2.69505	1.9625
A7	39	CBF3	2.91538	2.18163
A7	40	CBF3	3.08436	2.3494
A8	1	CBF4	0.617869	-0.000164199
A8	2	CBF4	0.617667	-0.00174087
A8	3	CBF4	0.619032	-0.00175071
A8	4	CBF4	0.621101	-0.00105674
A8	5	CBF4	0.623273	-0.000259355
A8	6	CBF4	0.625501	0.000594236
A8	7	CBF4	0.627045	0.000763149
A8	8	CBF4	0.627381	-0.000274932
A8	9	CBF4	0.630018	0.000987547
A8	10	CBF4	0.631394	0.000988196
A8	11	CBF4	0.632846	0.00106633
A8	12	CBF4	0.633287	0.000132499
A8	13	CBF4	0.635605	0.00107562
A8	14	CBF4	0.635876	-2.80302e-05
A8	15	CBF4	0.637181	-9.72975e-05
A8	16	CBF4	0.638593	-6.08262e-05
A8	17	CBF4	0.640642	0.000614309
A8	18	CBF4	0.641083	-0.000319881
A8	19	CBF4	0.641021	-0.00175606
A8	20	CBF4	0.643495	-0.000657496
A8	21	CBF4	0.643744	-0.00178236
A8	22	CBF4	0.648723	0.00182181
A8	23	CBF4	0.654378	0.00610141
A8	24	CBF4	0.665637	0.0159858
A8	25	CBF4	0.687896	0.0368702
A8	26	CBF4	0.727994	0.0755937
A8	27	CBF4	0.806455	0.15268
A8	28	CBF4	0.942582	0.287432
A8	29	CBF4	1.16888	0.512356
A8	30	CBF4	1.4851	0.827201
A8	31	CBF4	1.8017	1.14243
A8	32	CBF4	2.03899	1.37834
A8	33	CBF4	2.23985	1.57783
A8	34	CBF4	2.43256	1.76917
A8	35	CBF4	2.58806	1.92329
A8	36	CBF4	2.71122	2.04507
A8	37	CBF4	2.81129	2.14377
A8	38	CBF4	2.89677	2.22787
A8	39	CBF4	2.96204	2.29177
A8	40	CBF4	3.0152	2.34356
A9	1	CBF4	0.639643	-0.00242004
A9	2	CBF4	0.641958	-0.00151559
A9	3	CBF4	0.642855	-0.00202841
A9	4	CBF4	0.644376	-0.00191771
A9	5	CBF4	0.646851	-0.000852916
A9	6	CBF4	0.64951	0.000395399
A9	7	CBF4	0.651975	0.00145083
A9	8	CBF4	0.652911	0.000976217
A9	9	CBF4	0.654103	0.000758258
A9	10	CBF4	0.655607	0.000851972
A9	11	CBF4	0.657647	0.00148177
A9	12	CBF4	0.6589	0.00132407
A9	13	CBF4	0.659539	0.0005531
A9	14	CBF4	0.660624	0.000227733
A9	15	CBF4	0.662052	0.000245272
A9	16	CBF4	0.66326	4.37046e-05
A9	17	CBF4	0.664901	0.00027439
A9	18	CBF4	0.663987	-0.00205047
A9	19	CBF4	0.665936	-0.00151116
A9	20	CBF4	0.668608	-0.000249489
A9	21	CBF4	0.669532	-0.000735491
A9	22	CBF4	0.672441	0.000762926
A9	23	CBF4	0.680176	0.00708789
A9	24	CBF4	0.690879	0.0163807
A9	25	CBF4	0.713195	0.0372859
A9	26	CBF4	0.755148	0.077829
A9	27	CBF4	0.832292	0.153563
A9	28	CBF4	0.97008	0.28994
A9	29	CBF4	1.19637	0.514824
A9	30	CBF4	1.49922	0.816257
A9	31	CBF4	1.78875	1.10438
A9	32	CBF4	1.99981	1.31403
A9	33	CBF4	2.19279	1.5056
A9	34	CBF4	2.38043	1.69183
A9	35	CBF4	2.5266	1.83659
A9	36	CBF4	2.63916	1.94774
A9	37	CBF4	2.74031	2.04748
A9	38	CBF4	2.81843	2.12418
A9	39	CBF4	2.88363	2.18798
A9	40	CBF4	2.92924	2.23218
A10	1	CBF4	0.7668	-0.00535258
A10	2	CBF4	0.769846	-0.00362907
A10	3	CBF4	0.771956	-0.00284237
A10	4	CBF4	0.775127	-0.000992913
A10	5	CBF4	0.77714	-0.000302889
A10	6	CBF4	0.777583	-0.0011822
A10	7	CBF4	0.780294	0.000205798
A10	8	CBF4	0.78286	0.00144949
A10	9	CBF4	0.785312	0.00257963
A10	10	CBF4	0.785783	0.00172769
A10	11	CBF4	0.786155	0.000777092
A10	12	CBF4	0.788452	0.00175185
A10	13	CBF4	0.788681	0.000657963
A10	14	CBF4	0.78987	0.000524608
A10	15	CBF4	0.790492	-0.000176004
A10	16	CBF4	0.792311	0.000320782
A10	17	CBF4	0.791468	-0.00184414
A10	18	CBF4	0.793544	-0.00109105
A10	19	CBF4	0.794402	-0.00155551
A10	20	CBF4	0.797269	-1.12336e-05
A10	21	CBF4	0.798293	-0.000309455
A10	22	CBF4	0.800238	0.000312858
A10	23	CBF4	0.805971	0.00472352
A10	24	CBF4	0.816128	0.013558
A10	25	CBF4	0.836714	0.0328222
A10	26	CBF4	0.873033	0.0678185
A10	27	CBF4	0.941886	0.135349
A10	28	CBF4	1.06343	0.255567
A10	29	CBF4	1.25649	0.447313
A10	30	CBF4	1.5161	0.705594
A10	31	CBF4	1.75331	0.941484
A10	32	CBF4	1.93206	1.11891
A10	33	CBF4	2.09923	1.28476
A10	34	CBF4	2.25666	1.44086
A10	35	CBF4	2.37338	1.55627
A10	36	CBF4	2.476	1.65756
A10	37	CBF4	2.55301	1.73325
A10	38	CBF4	2.61486	1.79377
A10	39	CBF4	2.67481	1.8524
A10	40	CBF4	2.71636	1.89263
A11	1
A11	2
A11	3
A11	4
A11	5
A11	6
A11	7
A11	8
A11	9
A11	10
A11	11
A11	12
A11	13
A11	14
A11	15
A11	16
A11	17
A11	18
A11	19
A11	20
A11	21
A11	22
A11	23
A11	24
A11	25
A11	26
A11	27
A11	28
A11	29
A11	30
A11	31
A11	32
A11	33
A11	34
A11	35
A11	36
A11	37
A11	38
A11	39
A11	40
A12	1
A12	2
A12	3
A12	4
A12	5
A12	6
A12	7
A12	8
A12	9
A12	10
A12	11
A12	12
A12	13
A12	14
A12	15
A12	16
A12	17
A12	18
A12	19
A12	20
A12	21
A12	22
A12	23
A12	24
A12	25
A12	26
A12	27
A12	28
A12	29
A12	30
A12	31
A12	32
A12	33
A12	34
A12	35
A12	36
A12	37
A12	38
A12	39
A12	40
B1	1
B1	2
B1	3
B1	4
B1	5
B1	6
B1	7
B1	8
B1	9
B1	10
B1	11
B1	12
B1	13
B1	14
B1	15
B1	16
B1	17
B1	18
B1	19
B1	20
B1	21
B1	22
B1	23
B1	24
B1	25
B1	26
B1	27
B1	28
B1	29
B1	30
B1	31
B1	32
B1	33
B1	34
B1	35
B1	36
B1	37
B1	38
B1	39
B1	40
B2	1	CBF3	0.660479	-0.00621029
B2	2	CBF3	0.663007	-0.00479347
B2	3	CBF3	0.666179	-0.00273179
B2	4	CBF3	0.666584	-0.00343862
B2	5	CBF3	0.668791	-0.00234224
B2	6	CBF3	0.672463	0.000219229
B2	7	CBF3	0.673436	8.09043e-05
B2	8	CBF3	0.674001	-0.000464997
B2	9	CBF3	0.676111	0.00053328
B2	10	CBF3	0.678573	0.00188507
B2	11	CBF3	0.678902	0.00110302
B2	12	CBF3	0.682001	0.00309073
B2	13	CBF3	0.681197	0.00117607
B2	14	CBF3	0.682537	0.00140509
B2	15	CBF3	0.683707	0.00146358
B2	16	CBF3	0.684892	0.0015381
B2	17	CBF3	0.684342	-0.000123301
B2	18	CBF3	0.686791	0.00121424
B2	19	CBF3	0.687613	0.000925538
B2	20	CBF3	0.689331	0.00153221
B2	21	CBF3	0.688938	2.8285e-05
B2	22	CBF3	0.691436	0.00141608
B2	23	CBF3	0.69015	-0.000981799
B2	24	CBF3	0.691625	-0.000617061
B2	25	CBF3	0.692929	-0.00042446
B2	26	CBF3	0.692546	-0.00191855
B2	27	CBF3	0.69346	-0.00211511
B2	28	CBF3	0.694739	-0.00194725
B2	29	CBF3	0.694652	-0.00314534
B2	30	CBF3	0.698624	-0.000284658
B2	31	CBF3	0.702943	0.00292376
B2	32	CBF3	0.710252	0.00912147
B2	33	CBF3	0.724338	0.0220961
B2	34	CBF3	0.750057	0.046704
B2	35	CBF3	0.799351	0.0948875
B2	36	CBF3	0.89882	0.193246
B2	37	CBF3	1.06187	0.355183
B2	38	CBF3	1.32502	0.617219
B2	39	CBF3	1.67757	0.968665
B2	40	CBF3	2.0657	1.35568
B3	1	CBF3	0.621117	-0.006104
B3	2	CBF3	0.623807	-0.00448541
B3	3	CBF3	0.624732	-0.00463248
B3	4	CBF3	0.628022	-0.0024145
B3	5	CBF3	0.629766	-0.00174183
B3	6	CBF3	0.631422	-0.00115792
B3	7	CBF3	0.633368	-0.000283962
B3	8	CBF3	0.634758	3.45355e-05
B3	9	CBF3	0.63803	0.00223481
B3	10	CBF3	0.638413	0.00154587
B3	11	CBF3	0.639276	0.00133752
B3	12	CBF3	0.640445	0.00143429
B3	13	CBF3	0.641532	0.00144946
B3	14	CBF3	0.643625	0.00247058
B3	15	CBF3	0.645127	0.00290101
B3	16	CBF3	0.644614	0.0013161
B3	17	CBF3	0.646421	0.00205165
B3	18	CBF3	0.644692	-0.00074968
B3	19	CBF3	0.648893	0.00237995
B3	20	CBF3	0.648201	0.000615684
B3	21	CBF3	0.648633	-2.37247e-05
B3	22	CBF3	0.649421	-0.00030783
B3	23	CBF3	0.650618	-0.000182034
B3	24	CBF3	0.649923	-0.00194863
B3	25	CBF3	0.650559	-0.00238502
B3	26	CBF3	0.652942	-0.00107399
B3	27	CBF3	0.65303	-0.00205779
B3	28	CBF3	0.654768	-0.00139114
B3	29	CBF3	0.65781	0.000579059
B3	30	CBF3	0.664228	0.00592503
B3	31	CBF3	0.674369	0.0149949
B3	32	CBF3	0.695102	0.0346555
B3	33	CBF3	0.735082	0.0735639
B3	34	CBF3	0.805575	0.142985
B3	35	CBF3	0.934703	0.271042
B3	36	CBF3	1.15163	0.4869
B3	37	CBF3	1.4775	0.811696
B3	38	CBF3	1.87639	1.20951
B3	39	CBF3	2.25815	1.59021
B3	40	CBF3	2.56917	1.90015
B4	1	CBF3	0.708476	-0.00837266
B4	2	CBF3	0.713614	-0.00449802
B4	3	CBF3	0.714108	-0.00526694
B4	4	CBF3	0.716942	-0.00369614
B4	5	CBF3	0.720503	-0.00139769
B4	6	CBF3	0.72243	-0.000734428
B4	7	CBF3	0.724524	9.66784e-05
B4	8	CBF3	0.726851	0.00116054
B4	9	CBF3	0.728366	0.00141277
B4	10	CBF3	0.729337	0.00112068
B4	11	CBF3	0.731914	0.00243471
B4	12	CBF3	0.732157	0.00141479
B4	13	CBF3	0.735336	0.00333094
B4	14	CBF3	0.735303	0.00203518
B4	15	CBF3	0.73685	0.0023187
B4	16	CBF3	0.737125	0.00133067
B4	17	CBF3	0.73929	0.00223259
B4	18	CBF3	0.740017	0.00169618
B4	19	CBF3	0.740562	0.000978939
B4	20	CBF3	0.741696	0.000849219
B4	21	CBF3	0.741376	-0.000733841
B4	22	CBF3	0.741426	-0.00194705
B4	23	CBF3	0.743023	-0.00161305
B4	24	CBF3	0.742904	-0.00299506
B4	25	CBF3	0.744646	-0.00251527
B4	26	CBF3	0.746284	-0.00214037
B4	27	CBF3	0.74909	-0.000598304
B4	28	CBF3	0.752176	0.00122558
B4	29	CBF3	0.760706	0.0084919
B4	30	CBF3	0.775723	0.0222461
B4	31	CBF3	0.806666	0.0519259
B4	32	CBF3	0.862889	0.106886
B4	33	CBF3	0.960705	0.203439
B4	34	CBF3	1.13408	0.375553
B4	35	CBF3	1.40545	0.64566
B4	36	CBF3	1.76921	1.00815
B4	37	CBF3	2.15981	1.3975
B4	38	CBF3	2.48669	1.72311
B4	39	CBF3	2.73438	1.96954
B4	40	CBF3	2.91497	2.14886
B5	1	CBF3	0.690079	-0.00831228
B5	2	CBF3	0.695434	-0.0045713
B5	3	CBF3	0.696709	-0.00490989
B5	4	CBF3	0.7002	-0.00303161
B5	5	CBF3	0.702508	-0.00233762
B5	6	CBF3	0.706662	0.000203587
B5	7	CBF3	0.709077	0.00100493
B5	8	CBF3	0.711103	0.00141771
B5	9	CBF3	0.714404	0.00310478
B5	10	CBF3	0.71369	0.00077718
B5	11	CBF3	0.717318	0.00279213
B5	12	CBF3	0.718606	0.00246659
B5	13	CBF3	0.719692	0.00193905
B5	14	CBF3	0.721021	0.00165404
B5	15	CBF3	0.72202	0.00103954
B5	16	CBF3	0.7232	0.000606409
B5	17	CBF3	0.72533	0.00112338
B5	18	CBF3	0.725694	-0.000126749
B5	19	CBF3	0.727842	0.000407507
B5	20	CBF3	0.72799	-0.0010575
B5	21	CBF3	0.728918	-0.00174347
B5	22	CBF3	0.727629	-0.00464506
B5	23	CBF3	0.732795	-0.00109338
B5	24	CBF3	0.73591	0.000408437
B5	25	CBF3	0.742808	0.00569289
B5	26	CBF3	0.758648	0.0199199
B5	27	CBF3	0.785272	0.0449303
B5	28	CBF3	0.835541	0.0935855
B5	29	CBF3	0.927758	0.184189
B5	30	CBF3	1.09123	0.34605
B5	31	CBF3	1.35686	0.610062
B5	32	CBF3	1.73365	0.985237
B5	33	CBF3	2.16326	1.41323
B5	34	CBF3	2.53777	1.78613
B5	35	CBF3	2.80454	2.05129
B5	36	CBF3	3.01338	2.25852
B5	37	CBF3	3.16671	2.41023
B5	38	CBF3	3.2943	2.53621
B5	39	CBF3	3.39798	2.63828
B5	40	CBF3	3.46774	2.70642
B6	1	CBF3	0.64709	-0.00500938
B6	2	CBF3	0.651384	-0.00212641
B6	3	CBF3	0.653115	-0.00180649
B6	4	CBF3	0.65378	-0.00255213
B6	5	CBF3	0.658459	0.000715831
B6	6	CBF3	0.658924	-0.000230197
B6	7	CBF3	0.661274	0.000708415
B6	8	CBF3	0.662743	0.000766249
B6	9	CBF3	0.665944	0.00255578
B6	10	CBF3	0.666351	0.00155181
B6	11	CBF3	0.668237	0.00202688
B6	12	CBF3	0.66654	-0.0010816
B6	13	CBF3	0.66977	0.000737249
B6	14	CBF3	0.671449	0.00100543
B6	15	CBF3	0.672101	0.000246738
B6	16	CBF3	0.673077	-0.000188657
B6	17	CBF3	0.673339	-0.0013377
B6	18	CBF3	0.674814	-0.00127438
B6	19	CBF3	0.675749	-0.00175019
B6	20	CBF3	0.677992	-0.000918148
B6	21	CBF3	0.678431	-0.00189088
B6	22	CBF3	0.680657	-0.00107553
B6	23	CBF3	0.683312	0.000168438
B6	24	CBF3	0.688178	0.00362308
B6	25	CBF3	0.69573	0.00976422
B6	26	CBF3	0.711712	0.0243345
B6	27	CBF3	0.738619	0.0498307
B6	28	CBF3	0.795854	0.105655
B6	29	CBF3	0.895591	0.20398
B6	30	CBF3	1.07627	0.383251
B6	31	CBF3	1.37041	0.675975
B6	32	CBF3	1.77991	1.08407
B6	33	CBF3	2.25207	1.55482
B6	34	CBF3	2.66517	1.9665
B6	35	CBF3	2.95922	2.25914
B6	36	CBF3	3.17671	2.47522
B6	37	CBF3	3.34356	2.64066
B6	38	CBF3	3.48361	2.7793
B6	39	CBF3	3.57519	2.86947
B6	40	CBF3	3.6619	2.95477
B7	1	CBF3	0.666519	-0.006963
B7	2	CBF3	0.671567	-0.00326705
B7	3	CBF3	0.673335	-0.00285155
B7	4	CBF3	0.675833	-0.00170614
B7	5	CBF3	0.675991	-0.00289943
B7	6	CBF3	0.681173	0.000930094
B7	7	CBF3	0.68362	0.00202496
B7	8	CBF3	0.682739	-0.000208554
B7	9	CBF3	0.686059	0.00175922
B7	10	CBF3	0.686874	0.00122241
B7	11	CBF3	0.689329	0.00232497
B7	12	CBF3	0.689814	0.00145831
B7	13	CBF3	0.690035	0.000327061
B7	14	CBF3	0.693035	0.00197524
B7	15	CBF3	0.693183	0.000770559
B7	16	CBF3	0.694292	0.000527183
B7	17	CBF3	0.694301	-0.00081578
B7	18	CBF3	0.696942	0.00047316
B7	19	CBF3	0.696731	-0.00109016
B7	20	CBF3	0.69732	-0.00185341
B7	21	CBF3	0.699443	-0.00108172
B7	22	CBF3	0.699638	-0.00223937
B7	23	CBF3	0.702226	-0.00100372
B7	24	CBF3	0.706538	0.00195666
B7	25	CBF3	0.71339	0.00745625
B7	26	CBF3	0.728051	0.0207649
B7	27	CBF3	0.754304	0.0456661
B7	28	CBF3	0.807409	0.0974183
B7	29	CBF3	0.902336	0.190994
B7	30	CBF3	1.068	0.355304
B7	31	CBF3	1.33602	0.621976
B7	32	CBF3	1.71251	0.997113
B7	33	CBF3	2.13261	1.41586
B7	34	CBF3	2.49869	1.78058
B7	35	CBF3	2.76568	2.04622
B7	36	CBF3	2.95193	2.23112
B7	37	CBF3	3.10929	2.38713
B7	38	CBF3	3.2262	2.50268
B7	39	CBF3	3.31424	2.58937
B7	40	CBF3	3.39246	2.66625
B8	1	CBF4	0.646522	-0.00468117
B8	2	CBF4	0.649738	-0.00215678
B8	3	CBF4	0.649156	-0.00343196
B8	4	CBF4	0.652508	-0.000772092
B8	5	CBF4	0.65211	-0.00186184
B8	6	CBF4	0.655089	0.000424606
B8	7	CBF4	0.655113	-0.000244448
B8	8	CBF4	0.656371	0.000321209
B8	9	CBF4	0.657647	0.0009057
B8	10	CBF4	0.659432	0.00199814
B8	11	CBF4	0.659967	0.00184067
B8	12	CBF4	0.660156	0.00133679
B8	13	CBF4	0.661656	0.00214444
B8	14	CBF4	0.661438	0.00123422
B8	15	CBF4	0.662	0.00110447
B8	16	CBF4	0.662213	0.0006249
B8	17	CBF4	0.661846	-0.000434386
B8	18	CBF4	0.663272	0.000299355
B8	19	CBF4	0.662098	-0.00156722
B8	20	CBF4	0.66409	-0.00026723
B8	21	CBF4	0.66362	-0.00143005
B8	22	CBF4	0.664268	-0.00147391
B8	23	CBF4	0.665683	-0.000751374
B8	24	CBF4	0.670622	0.00349475
B8	25	CBF4	0.681299	0.0134796
B8	26	CBF4	0.697133	0.0286217
B8	27	CBF4	0.727695	0.058491
B8	28	CBF4	0.789243	0.119347
B8	29	CBF4	0.897455	0.226866
B8	30	CBF4	1.08182	0.410542
B8	31	CBF4	1.34951	0.677541
B8	32	CBF4	1.64055	0.96788
B8	33	CBF4	1.85037	1.17701
B8	34	CBF4	2.03039	1.35634
B8	35	CBF4	2.19698	1.52224
B8	36	CBF4	2.3314	1.65597
B8	37	CBF4	2.44617	1.77004
B8	38	CBF4	2.52819	1.85137
B8	39	CBF4	2.59868	1.92117
B8	40	CBF4	2.65364	1.97544
B9	1	CBF4	0.643446	-0.00458251
B9	2	CBF4	0.646842	-0.00207296
B9	3	CBF4	0.647963	-0.00183726
B9	4	CBF4	0.649115	-0.00157159
B9	5	CBF4	0.651002	-0.000570329
B9	6	CBF4	0.651638	-0.000820114
B9	7	CBF4	0.652924	-0.000420686
B9	8	CBF4	0.655802	0.00157203
B9	9	CBF4	0.657528	0.0024123
B9	10	CBF4	0.656163	0.000161467
B9	11	CBF4	0.657159	0.000270919
B9	12	CBF4	0.658946	0.00117252
B9	13	CBF4	0.65868	2.02571e-05
B9	14	CBF4	0.662646	0.00310046
B9	15	CBF4	0.661676	0.00124463
B9	16	CBF4	0.661255	-6.24208e-05
B9	17	CBF4	0.662031	-0.000172195
B9	18	CBF4	0.662903	-0.000185528
B9	19	CBF4	0.662703	-0.00127228
B9	20	CBF4	0.663601	-0.00126005
B9	21	CBF4	0.663986	-0.00176094
B9	22	CBF4	0.665301	-0.00133118
B9	23	CBF4	0.668828	0.00130998
B9	24	CBF4	0.67231	0.00390596
B9	25	CBF4	0.682428	0.0131375
B9	26	CBF4	0.703454	0.0332777
B9	27	CBF4	0.742339	0.0712771
B9	28	CBF4	0.814169	0.142221
B9	29	CBF4	0.946851	0.274018
B9	30	CBF4	1.15333	0.479615
B9	31	CBF4	1.42471	0.750106
B9	32	CBF4	1.67961	1.00412
B9	33	CBF4	1.87842	1.20204
B9	34	CBF4	2.07716	1.3999
B9	35	CBF4	2.25222	1.57407
B9	36	CBF4	2.39787	1.71884
B9	37	CBF4	2.51383	1.83391
B9	38	CBF4	2.61096	1.93016
B9	39	CBF4	2.69105	2.00936
B9	40	CBF4	2.75315	2.07057
B10	1	CBF4	0.791596	-0.00405073
B10	2	CBF4	0.793712	-0.00313631
B10	3	CBF4	0.795697	-0.00235177
B10	4	CBF4	0.798649	-0.000601877
B10	5	CBF4	0.799452	-0.000999595
B10	6	CBF4	0.801736	8.35052e-05
B10	7	CBF4	0.803531	0.000676417
B10	8	CBF4	0.805106	0.00105034
B10	9	CBF4	0.806166	0.000909042
B10	10	CBF4	0.807891	0.00143323
B10	11	CBF4	0.808656	0.000996709
B10	12	CBF4	0.810067	0.00120606
B10	13	CBF4	0.812142	0.00208079
B10	14	CBF4	0.810809	-0.000453758
B10	15	CBF4	0.812463	-7.9852e-07
B10	16	CBF4	0.812684	-0.000981271
B10	17	CBF4	0.815721	0.00085398
B10	18	CBF4	0.815102	-0.000966381
B10	19	CBF4	0.815994	-0.00127487
B10	20	CBF4	0.817501	-0.000969373
B10	21	CBF4	0.817413	-0.00225902
B10	22	CBF4	0.818689	-0.00218443
B10	23	CBF4	0.822277	0.000203122
B10	24	CBF4	0.826825	0.00354995
B10	25	CBF4	0.834343	0.00986663
B10	26	CBF4	0.850299	0.024621
B10	27	CBF4	0.881297	0.0544176
B10	28	CBF4	0.94107	0.11299
B10	29	CBF4	1.04604	0.216761
B10	30	CBF4	1.22341	0.392925
B10	31	CBF4	1.47665	0.64497
B10	32	CBF4	1.74428	0.911397
B10	33	CBF4	1.94282	1.10873
B10	34	CBF4	2.12096	1.28567
B10	35	CBF4	2.28723	1.45074
B10	36	CBF4	2.41806	1.58037
B10	37	CBF4	2.52555	1.68666
B10	38	CBF4	2.61145	1.77135
B10	39	CBF4	2.67678	1.83549
B10	40	CBF4	2.73581	1.89331
B11	1
B11	2
B11	3
B11	4
B11	5
B11	6
B11	7
B11	8
B11	9
B11	10
B11	11
B11	12
B11	13
B11	14
B11	15
B11	16
B11	17
B11	18
B11	19
B11	20
B11	21
B11	22
B11	23
B11	24
B11	25
B11	26
B11	27
B11	28
B11	29
B11	30
B11	31
B11	32
B11	33
B11	34
B11	35
B11	36
B11	37
B11	38
B11	39
B11	40
B12	1
B12	2
B12	3
B12	4
B12	5
B12	6
B12	7
B12	8
B12	9
B12	10
B12	11
B12	12
B12	13
B12	14
B12	15
B12	16
B12	17
B12	18
B12	19
B12	20
B12	21
B12	22
B12	23
B12	24
B12	25
B12	26
B12	27
B12	28
B12	29
B12	30
B12	31
B12	32
B12	33
B12	34
B12	35
B12	36
B12	37
B12	38
B12	39
B12	40
C1	1
C1	2
C1	3
C1	4
C1	5
C1	6
C1	7
C1	8
C1	9
C1	10
C1	11
C1	12
C1	13
C1	14
C1	15
C1	16
C1	17
C1	18
C1	19
C1	20
C1	21
C1	22
C1	23
C1	24
C1	25
C1	26
C1	27
C1	28
C1	29
C1	30
C1	31
C1	32
C1	33
C1	34
C1	35
C1	36
C1	37
C1	38
C1	39
C1	40
C2	1	CBF3	0.646504	-0.0054452
C2	2	CBF3	0.649296	-0.00389457
C2	3	CBF3	0.650925	-0.00350605
C2	4	CBF3	0.653496	-0.00217584
C2	5	CBF3	0.655202	-0.00171026
C2	6	CBF3	0.657158	-0.00099481
C2	7	CBF3	0.660252	0.000857596
C2	8	CBF3	0.660936	0.000301617
C2	9	CBF3	0.663886	0.00201079
C2	10	CBF3	0.662872	-0.000244395
C2	11	CBF3	0.66724	0.00288266
C2	12	CBF3	0.667742	0.00214429
C2	13	CBF3	0.667423	0.000584625
C2	14	CBF3	0.669816	0.00173656
C2	15	CBF3	0.67112	0.00179933
C2	16	CBF3	0.672394	0.00183249
C2	17	CBF3	0.672617	0.000815585
C2	18	CBF3	0.673451	0.000408618
C2	19	CBF3	0.673701	-0.000582416
C2	20	CBF3	0.676134	0.000609392
C2	21	CBF3	0.676205	-0.000560217
C2	22	CBF3	0.676791	-0.00121454
C2	23	CBF3	0.678275	-0.000971344
C2	24	CBF3	0.677186	-0.00330175
C2	25	CBF3	0.681223	-0.000505328
C2	26	CBF3	0.682752	-0.000216591
C2	27	CBF3	0.687369	0.00315955
C2	28	CBF3	0.697755	0.0123046
C2	29	CBF3	0.715041	0.0283495
C2	30	CBF3	0.747999	0.0600669
C2	31	CBF3	0.809324	0.120152
C2	32	CBF3	0.921681	0.231267
C2	33	CBF3	1.1093	0.41765
C2	34	CBF3	1.39362	0.700721
C2	35	CBF3	1.74316	1.04902
C2	36	CBF3	2.10442	1.40904
C2	37	CBF3	2.41564	1.71902
C2	38	CBF3	2.67316	1.9753
C2	39	CBF3	2.86499	2.16589
C2	40	CBF3	3.01681	2.31647
C3	1	CBF3	0.616681	-0.00711722
C3	2	CBF3	0.621054	-0.00403419
C3	3	CBF3	0.622883	-0.00349563
C3	4	CBF3	0.625839	-0.00182988
C3	5	CBF3	0.627179	-0.00177989
C3	6	CBF3	0.629715	-0.000534359
C3	7	CBF3	0.631562	2.20264e-05
C3	8	CBF3	0.63284	9.66453e-06
C3	9	CBF3	0.634865	0.000744685
C3	10	CBF3	0.636026	0.000614664
C3	11	CBF3	0.638278	0.00157648
C3	12	CBF3	0.641513	0.00352159
C3	13	CBF3	0.641281	0.00199855
C3	14	CBF3	0.642369	0.00179695
C3	15	CBF3	0.643534	0.00167098
C3	16	CBF3	0.644514	0.00136089
C3	17	CBF3	0.645634	0.00119076
C3	18	CBF3	0.64662	0.00088645
C3	19	CBF3	0.647236	0.000211404
C3	20	CBF3	0.648553	0.000238322
C3	21	CBF3	0.648699	-0.00090635
C3	22	CBF3	0.648967	-0.00192824
C3	23	CBF3	0.649437	-0.00274854
C3	24	CBF3	0.652286	-0.00118942
C3	25	CBF3	0.652484	-0.002282
C3	26	CBF3	0.654492	-0.00156492
C3	27	CBF3	0.659763	0.00241581
C3	28	CBF3	0.666836	0.00819839
C3	29	CBF3	0.679921	0.0199936
C3	30	CBF3	0.70417	0.0429517
C3	31	CBF3	0.750838	0.0883301
C3	32	CBF3	0.839195	0.175397
C3	33	CBF3	0.991603	0.326514
C3	34	CBF3	1.23725	0.570868
C3	35	CBF3	1.57881	0.911137
C3	36	CBF3	1.96488	1.29592
C3	37	CBF3	2.32375	1.6535
C3	38	CBF3	2.61513	1.94359
C3	39	CBF3	2.84248	2.16965
C3	40	CBF3	3.01629	2.34217
C4	1	CBF3	0.682824	-0.010187
C4	2	CBF3	0.688133	-0.00639504
C4	3	CBF3	0.690333	-0.00571176
C4	4	CBF3	0.694549	-0.00301295
C4	5	CBF3	0.697203	-0.00187548
C4	6	CBF3	0.69898	-0.00161527
C4	7	CBF3	0.702515	0.000402445
C4	8	CBF3	0.705309	0.00167999
C4	9	CBF3	0.707182	0.00203568
C4	10	CBF3	0.708269	0.00160567
C4	11	CBF3	0.710405	0.00222488
C4	12	CBF3	0.711159	0.00146167
C4	13	CBF3	0.713732	0.00251796
C4	14	CBF3	0.714622	0.00189108
C4	15	CBF3	0.716971	0.00272361
C4	16	CBF3	0.717722	0.00195719
C4	17	CBF3	0.719986	0.00270467
C4	18	CBF3	0.720985	0.00218692
C4	19	CBF3	0.720432	0.000117239
C4	20	CBF3	0.721159	-0.000673501
C4	21	CBF3	0.722573	-0.000776046
C4	22	CBF3	0.723147	-0.0017186
C4	23	CBF3	0.724422	-0.0019608
C4	24	CBF3	0.726092	-0.00180734
C4	25	CBF3	0.726741	-0.00267515
C4	26	CBF3	0.728038	-0.002895
C4	27	CBF3	0.731554	-0.000896834
C4	28	CBF3	0.736077	0.00210972
C4	29	CBF3	0.745375	0.00989114
C4	30	CBF3	0.762351	0.02535
C4	31	CBF3	0.793593	0.0550749
C4	32	CBF3	0.854752	0.114717
C4	33	CBF3	0.964338	0.222786
C4	34	CBF3	1.14985	0.406783
C4	35	CBF3	1.42978	0.685194
C4	36	CBF3	1.78733	1.04122
C4	37	CBF3	2.16362	1.416
C4	38	CBF3	2.47066	1.72152
C4	39	CBF3	2.72276	1.9721
C4	40	CBF3	2.92072	2.16855
C5	1	CBF3	0.7032	-0.00289096
C5	2	CBF3	0.70485	-0.00307201
C5	3	CBF3	0.707021	-0.00273241
C5	4	CBF3	0.711009	-0.00057541
C5	5	CBF3	0.713349	-6.60577e-05
C5	6	CBF3	0.716058	0.000811532
C5	7	CBF3	0.717145	6.72792e-05
C5	8	CBF3	0.719979	0.00107034
C5	9	CBF3	0.721748	0.00100814
C5	10	CBF3	0.725772	0.0032012
C5	11	CBF3	0.725712	0.00130998
C5	12	CBF3	0.72651	0.00027724
C5	13	CBF3	0.727243	-0.000820886
C5	14	CBF3	0.728764	-0.0011308
C5	15	CBF3	0.730761	-0.000965247
C5	16	CBF3	0.733531	-2.57877e-05
C5	17	CBF3	0.733796	-0.00159169
C5	18	CBF3	0.736233	-0.000986077
C5	19	CBF3	0.737716	-0.00133336
C5	20	CBF3	0.743363	0.00248202
C5	21	CBF3	0.751457	0.00874537
C5	22	CBF3	0.765561	0.0210185
C5	23	CBF3	0.792128	0.0457537
C5	24	CBF3	0.844108	0.0959027
C5	25	CBF3	0.939168	0.189132
C5	26	CBF3	1.10708	0.355209
C5	27	CBF3	1.37528	0.621583
C5	28	CBF3	1.75161	0.996077
C5	29	CBF3	2.18337	1.42601
C5	30	CBF3	2.55609	1.7969
C5	31	CBF3	2.83271	2.07168
C5	32	CBF3	3.04779	2.28494
C5	33	CBF3	3.2135	2.44881
C5	34	CBF3	3.34086	2.57435
C5	35	CBF3	3.4451	2.67675
C5	36	CBF3	3.52775	2.75757
C5	37	CBF3	3.58846	2.81646
C5	38	CBF3	3.63602	2.86218
C5	39	CBF3	3.68521	2.90954
C5	40	CBF3	3.71858	2.94108
C6	1	CBF3	0.621378	-0.00193369
C6	2	CBF3	0.623845	-0.00110378
C6	3	CBF3	0.626133	-0.000453043
C6	4	CBF3	0.62856	0.000336574
C6	5	CBF3	0.63027	0.000408671
C6	6	CBF3	0.631636	0.000137564
C6	7	CBF3	0.633442	0.000306339
C6	8	CBF3	0.634798	2.52776e-05
C6	9	CBF3	0.636749	0.000338475
C6	10	CBF3	0.638426	0.000378087
C6	11	CBF3	0.639644	-4.1257e-05
C6	12	CBF3	0.641081	-0.000241435
C6	13	CBF3	0.643442	0.000481783
C6	14	CBF3	0.645152	0.000554535
C6	15	CBF3	0.643935	-0.00229942
C6	16	CBF3	0.646187	-0.00168498
C6	17	CBF3	0.648239	-0.0012704
C6	18	CBF3	0.650591	-0.000555642
C6	19	CBF3	0.654017	0.00123337
C6	20	CBF3	0.656767	0.0023455
C6	21	CBF3	0.665716	0.00965772
C6	22	CBF3	0.682457	0.0247609
C6	23	CBF3	0.71418	0.0548464
C6	24	CBF3	0.771308	0.110337
C6	25	CBF3	0.878483	0.215875
C6	26	CBF3	1.06711	0.402866
C6	27	CBF3	1.36896	0.703081
C6	28	CBF3	1.78637	1.11885
C6	29	CBF3	2.25559	1.58643
C6	30	CBF3	2.64679	1.976
C6	31	CBF3	2.93937	2.26693
C6	32	CBF3	3.1583	2.48423
C6	33	CBF3	3.32898	2.65327
C6	34	CBF3	3.46322	2.78587
C6	35	CBF3	3.56567	2.88669
C6	36	CBF3	3.64826	2.96764
C6	37	CBF3	3.71129	3.02904
C6	38	CBF3	3.76948	3.08558
C6	39	CBF3	3.80643	3.1209
C6	40	CBF3	3.85098	3.16381
C7	1	CBF3	0.647406	-0.00247595
C7	2	CBF3	0.648902	-0.0025506
C7	3	CBF3	0.65125	-0.0017738
C7	4	CBF3	0.653948	-0.000646288
C7	5	CBF3	0.65596	-0.000205478
C7	6	CBF3	0.657967	0.000230147
C7	7	CBF3	0.66064	0.00133251
C7	8	CBF3	0.662041	0.00116285
C7	9	CBF3	0.663332	0.000882978
C7	10	CBF3	0.665206	0.00118628
C7	11	CBF3	0.665963	0.000372115
C7	12	CBF3	0.667043	-0.000118755
C7	13	CBF3	0.669811	0.00107838
C7	14	CBF3	0.669198	-0.0011058
C7	15	CBF3	0.671019	-0.000855964
C7	16	CBF3	0.672612	-0.000833817
C7	17	CBF3	0.673684	-0.00133291
C7	18	CBF3	0.675138	-0.00144988
C7	19	CBF3	0.676862	-0.00129625
C7	20	CBF3	0.683103	0.00337369
C7	21	CBF3	0.687934	0.00663416
C7	22	CBF3	0.705315	0.0224439
C7	23	CBF3	0.732871	0.0484292
C7	24	CBF3	0.786348	0.100336
C7	25	CBF3	0.883203	0.195619
C7	26	CBF3	1.05528	0.366123
C7	27	CBF3	1.32894	0.638217
C7	28	CBF3	1.71149	1.01919
C7	29	CBF3	2.14055	1.44668
C7	30	CBF3	2.50533	1.8099
C7	31	CBF3	2.7756	2.07859
C7	32	CBF3	2.98945	2.29087
C7	33	CBF3	3.14319	2.44304
C7	34	CBF3	3.26351	2.56179
C7	35	CBF3	3.3637	2.66041
C7	36	CBF3	3.43885	2.73398
C7	37	CBF3	3.49724	2.79081
C7	38	CBF3	3.55085	2.84284
C7	39	CBF3	3.59378	2.88421
C7	40	CBF3	3.62836	2.91721
C8	1	CBF4	0.611322	-0.00220325
C8	2	CBF4	0.612546	-0.00207342
C8	3	CBF4	0.613578	-0.00213546
C8	4	CBF4	0.615656	-0.00115198
C8	5	CBF4	0.6179	-2.49792e-06
C8	6	CBF4	0.619164	0.000167621
C8	7	CBF4	0.620777	0.000686427
C8	8	CBF4	0.621295	0.000109521
C8	9	CBF4	0.622991	0.000711117
C8	10	CBF4	0.625693	0.00231938
C8	11	CBF4	0.625663	0.00119417
C8	12	CBF4	0.625338	-0.000224535
C8	13	CBF4	0.627117	0.000459853
C8	14	CBF4	0.627701	-5.04156e-05
C8	15	CBF4	0.630014	0.00116857
C8	16	CBF4	0.629972	3.14359e-05
C8	17	CBF4	0.630675	-0.000359087
C8	18	CBF4	0.632181	5.24905e-05
C8	19	CBF4	0.631428	-0.00179489
C8	20	CBF4	0.632871	-0.00144631
C8	21	CBF4	0.633742	-0.00167012
C8	22	CBF4	0.636743	0.000236459
C8	23	CBF4	0.639299	0.00169827
C8	24	CBF4	0.645742	0.00704756
C8	25	CBF4	0.659808	0.0200187
C8	26	CBF4	0.682232	0.0413483
C8	27	CBF4	0.728411	0.086433
C8	28	CBF4	0.811474	0.168402
C8	29	CBF4	0.954408	0.310242
C8	30	CBF4	1.17569	0.530425
C8	31	CBF4	1.44643	0.800072
C8	32	CBF4	1.67419	1.02674
C8	33	CBF4	1.83756	1.18901
C8	34	CBF4	1.99898	1.34935
C8	35	CBF4	2.13184	1.4811
C8	36	CBF4	2.23861	1.58678
C8	37	CBF4	2.31937	1.66645
C8	38	CBF4	2.38658	1.73256
C8	39	CBF4	2.44367	1.78856
C8	40	CBF4	2.49331	1.8371
C9	1	CBF4	0.649043	-0.00430592
C9	2	CBF4	0.651737	-0.00274505
C9	3	CBF4	0.653655	-0.00195969
C9	4	CBF4	0.65502	-0.0017274
C9	5	CBF4	0.658077	0.000196232
C9	6	CBF4	0.660274	0.00126072
C9	7	CBF4	0.660764	0.000617655
C9	8	CBF4	0.661112	-0.000167389
C9	9	CBF4	0.664255	0.00184267
C9	10	CBF4	0.664306	0.000760494
C9	11	CBF4	0.664587	-9.16048e-05
C9	12	CBF4	0.667896	0.00208433
C9	13	CBF4	0.667521	0.000576462
C9	14	CBF4	0.668081	4.14724e-06
C9	15	CBF4	0.669369	0.000159248
C9	16	CBF4	0.670263	-8.04138e-05
C9	17	CBF4	0.670469	-0.00100702
C9	18	CBF4	0.671546	-0.0010628
C9	19	CBF4	0.672237	-0.0015047
C9	20	CBF4	0.673448	-0.00142679
C9	21	CBF4	0.674613	-0.00139507
C9	22	CBF4	0.677239	9.8454e-05
C9	23	CBF4	0.681096	0.00282245
C9	24	CBF4	0.687562	0.00815487
C9	25	CBF4	0.700535	0.0199958
C9	26	CBF4	0.725503	0.04383
C9	27	CBF4	0.775284	0.0924779
C9	28	CBF4	0.861938	0.177999
C9	29	CBF4	1.01232	0.327244
C9	30	CBF4	1.24348	0.557275
C9	31	CBF4	1.51915	0.831813
C9	32	CBF4	1.74168	1.05321
C9	33	CBF4	1.91106	1.22146
C9	34	CBF4	2.07973	1.38899
C9	35	CBF4	2.21166	1.51979
C9	36	CBF4	2.31698	1.62398
C9	37	CBF4	2.40701	1.71287
C9	38	CBF4	2.47006	1.77479
C9	39	CBF4	2.52933	1.83292
C9	40	CBF4	2.57577	1.87823
C10	1	CBF4	0.780149	-0.00646897
C10	2	CBF4	0.785043	-0.00243187
C10	3	CBF4	0.7853	-0.00303161
C10	4	CBF4	0.78857	-0.000617909
C10	5	CBF4	0.790056	1.1584e-05
C10	6	CBF4	0.791687	0.000785917
C10	7	CBF4	0.791786	2.80523e-05
C10	8	CBF4	0.793164	0.000549006
C10	9	CBF4	0.795982	0.00251031
C10	10	CBF4	0.796018	0.00168968
C10	11	CBF4	0.796102	0.000917508
C10	12	CBF4	0.797448	0.00140627
C10	13	CBF4	0.797576	0.000678332
C10	14	CBF4	0.798169	0.00041459
C10	15	CBF4	0.798066	-0.00054599
C10	16	CBF4	0.798338	-0.00113029
C10	17	CBF4	0.798874	-0.00145071
C10	18	CBF4	0.80022	-0.00096111
C10	19	CBF4	0.80058	-0.00145814
C10	20	CBF4	0.80198	-0.000915137
C10	21	CBF4	0.801824	-0.00192787
C10	22	CBF4	0.803586	-0.00102217
C10	23	CBF4	0.804796	-0.000669063
C10	24	CBF4	0.81106	0.00473876
C10	25	CBF4	0.820162	0.0129833
C10	26	CBF4	0.841334	0.0332989
C10	27	CBF4	0.879397	0.0705054
C10	28	CBF4	0.946781	0.137032
C10	29	CBF4	1.06877	0.25817
C10	30	CBF4	1.25308	0.441614
C10	31	CBF4	1.47186	0.65954
C10	32	CBF4	1.65654	0.84336
C10	33	CBF4	1.79462	0.98059
C10	34	CBF4	1.93541	1.12052
C10	35	CBF4	2.0486	1.23285
C10	36	CBF4	2.13714	1.32054
C10	37	CBF4	2.20525	1.38779
C10	38	CBF4	2.26399	1.44567
C10	39	CBF4	2.30927	1.4901
C10	40	CBF4	2.34538	1.52535
C11	1
C11	2
C11	3
C11	4
C11	5
C11	6
C11	7
C11	8
C11	9
C11	10
C11	11
C11	12
C11	13
C11	14
C11	15
C11	16
C11	17
C11	18
C11	19
C11	20
C11	21
C11	22
C11	23
C11	24
C11	25
C11	26
C11	27
C11	28
C11	29
C11	30
C11	31
C11	32
C11	33
C11	34
C11	35
C11	36
C11	37
C11	38
C11	39
C11	40
C12	1
C12	2
C12	3
C12	4
C12	5
C12	6
C12	7
C12	8
C12	9
C12	10
C12	11
C12	12
C12	13
C12	14
C12	15
C12	16
C12	17
C12	18
C12	19
C12	20
C12	21
C12	22
C12	23
C12	24
C12	25
C12	26
C12	27
C12	28
C12	29
C12	30
C12	31
C12	32
C12	33
C12	34
C12	35
C12	36
C12	37
C12	38
C12	39
C12	40
D1	1
D1	2
D1	3
D1	4
D1	5
D1	6
D1	7
D1	8
D1	9
D1	10
D1	11
D1	12
D1	13
D1	14
D1	15
D1	16
D1	17
D1	18
D1	19
D1	20
D1	21
D1	22
D1	23
D1	24
D1	25
D1	26
D1	27
D1	28
D1	29
D1	30
D1	31
D1	32
D1	33
D1	34
D1	35
D1	36
D1	37
D1	38
D1	39
D1	40
D2	1	CBF3	0.725375	0.000364922
D2	2	CBF3	0.727308	0.000160956
D2	3	CBF3	0.727387	-0.00189701
D2	4	CBF3	0.730675	-0.000745926
D2	5	CBF3	0.732987	-0.000570151
D2	6	CBF3	0.736262	0.000568299
D2	7	CBF3	0.740176	0.00234476
D2	8	CBF3	0.740576	0.000608058
D2	9	CBF3	0.744191	0.00208667
D2	10	CBF3	0.745356	0.00111482
D2	11	CBF3	0.745215	-0.00116261
D2	12	CBF3	0.748419	-9.59867e-05
D2	13	CBF3	0.750335	-0.000316821
D2	14	CBF3	0.752514	-0.000273964
D2	15	CBF3	0.753962	-0.000962932
D2	16	CBF3	0.755887	-0.00117483
D2	17	CBF3	0.758013	-0.00118526
D2	18	CBF3	0.760735	-0.000600234
D2	19	CBF3	0.765735	0.00226311
D2	20	CBF3	0.774327	0.00871806
D2	21	CBF3	0.791392	0.023646
D2	22	CBF3	0.821793	0.0519104
D2	23	CBF3	0.876476	0.104457
D2	24	CBF3	0.982943	0.208787
D2	25	CBF3	1.16211	0.385814
D2	26	CBF3	1.45359	0.675159
D2	27	CBF3	1.8553	1.07474
D2	28	CBF3	2.30744	1.52474
D2	29	CBF3	2.6976	1.91276
D2	30	CBF3	2.97441	2.18743
D2	31	CBF3	3.19757	2.40846
D2	32	CBF3	3.37595	2.5847
D2	33	CBF3	3.50828	2.7149
D2	34	CBF3	3.60232	2.8068
D2	35	CBF3	3.68969	2.89203
D2	36	CBF3	3.75291	2.95311
D2	37	CBF3	3.8134	3.01146
D2	38	CBF3	3.86124	3.05717
D2	39	CBF3	3.89421	3.088
D2	40	CBF3	3.93004	3.12169
D3	1	CBF3	0.660369	-0.00336003
D3	2	CBF3	0.663707	-0.00158068
D3	3	CBF3	0.665809	-0.00103741
D3	4	CBF3	0.668207	-0.000198507
D3	5	CBF3	0.669293	-0.000671142
D3	6	CBF3	0.672343	0.000819897
D3	7	CBF3	0.674647	0.00156493
D3	8	CBF3	0.675111	0.000470256
D3	9	CBF3	0.678174	0.00197524
D3	10	CBF3	0.677578	-0.000179734
D3	11	CBF3	0.679396	7.88605e-05
D3	12	CBF3	0.681248	0.000372025
D3	13	CBF3	0.681421	-0.00101346
D3	14	CBF3	0.682511	-0.00148263
D3	15	CBF3	0.683848	-0.00170457
D3	16	CBF3	0.685329	-0.00178227
D3	17	CBF3	0.687756	-0.000914156
D3	18	CBF3	0.690708	0.000479013
D3	19	CBF3	0.695011	0.00322366
D3	20	CBF3	0.703492	0.0101458
D3	21	CBF3	0.717985	0.0230802
D3	22	CBF3	0.747058	0.0505945
D3	23	CBF3	0.802298	0.104276
D3	24	CBF3	0.904671	0.20509
D3	25	CBF3	1.08281	0.381667
D3	26	CBF3	1.37034	0.667643
D3	27	CBF3	1.76938	1.06512
D3	28	CBF3	2.22454	1.51872
D3	29	CBF3	2.6079	1.90053
D3	30	CBF3	2.88865	2.17971
D3	31	CBF3	3.09318	2.38269
D3	32	CBF3	3.25645	2.54439
D3	33	CBF3	3.37673	2.66312
D3	34	CBF3	3.47699	2.76182
D3	35	CBF3	3.55705	2.84032
D3	36	CBF3	3.61477	2.89648
D3	37	CBF3	3.67228	2.95243
D3	38	CBF3	3.70391	2.98251
D3	39	CBF3	3.73969	3.01673
D3	40	CBF3	3.77121	3.04668
D4	1	CBF3	0.719713	-0.00185677
D4	2	CBF3	0.721383	-0.00221298
D4	3	CBF3	0.723174	-0.00244933
D4	4	CBF3	0.727416	-0.000234316
D4	5	CBF3	0.730355	0.000677798
D4	6	CBF3	0.733035	0.00133158
D4	7	CBF3	0.734416	0.000685753
D4	8	CBF3	0.73621	0.000453219
D4	9	CBF3	0.738608	0.000823884
D4	10	CBF3	0.740287	0.000475717
D4	11	CBF3	0.74219	0.000352141
D4	12	CBF3	0.742803	-0.00106188
D4	13	CBF3	0.74708	0.00118884
D4	14	CBF3	0.747327	-0.000591449
D4	15	CBF3	0.74998	3.47413e-05
D4	16	CBF3	0.750152	-0.00182005
D4	17	CBF3	0.7519	-0.00209854
D4	18	CBF3	0.756153	0.000127974
D4	19	CBF3	0.760156	0.00210391
D4	20	CBF3	0.768492	0.00841311
D4	21	CBF3	0.782372	0.0202667
D4	22	CBF3	0.808806	0.0446734
D4	23	CBF3	0.860115	0.0939551
D4	24	CBF3	0.956029	0.187843
D4	25	CBF3	1.12086	0.35065
D4	26	CBF3	1.39022	0.617985
D4	27	CBF3	1.76679	0.992521
D4	28	CBF3	2.20559	1.4293
D4	29	CBF3	2.58614	1.80782
D4	30	CBF3	2.85859	2.07824
D4	31	CBF3	3.06971	2.28734
D4	32	CBF3	3.2347	2.4503
D4	33	CBF3	3.35929	2.57287
D4	34	CBF3	3.46228	2.67383
D4	35	CBF3	3.53701	2.74652
D4	36	CBF3	3.59797	2.80547
D4	37	CBF3	3.65304	2.8585
D4	38	CBF3	3.70066	2.9041
D4	39	CBF3	3.73939	2.94081
D4	40	CBF3	3.75549	2.95488
D5	1	CBF3	0.681195	-0.00241637
D5	2	CBF3	0.683167	-0.00219574
D5	3	CBF3	0.683869	-0.00324468
D5	4	CBF3	0.686771	-0.00209343
D5	5	CBF3	0.687714	-0.00290181
D5	6	CBF3	0.691989	-0.000378945
D5	7	CBF3	0.693872	-0.000247119
D5	8	CBF3	0.697733	0.00186304
D5	9	CBF3	0.699177	0.00155564
D5	10	CBF3	0.700822	0.00144875
D5	11	CBF3	0.704631	0.003507
D5	12	CBF3	0.704662	0.00178661
D5	13	CBF3	0.706865	0.0022378
D5	14	CBF3	0.708943	0.00256442
D5	15	CBF3	0.708491	0.000361766
D5	16	CBF3	0.711015	0.00113386
D5	17	CBF3	0.711423	-0.000209584
D5	18	CBF3	0.713107	-0.000276897
D5	19	CBF3	0.713893	-0.0012415
D5	20	CBF3	0.715721	-0.00116522
D5	21	CBF3	0.71641	-0.00222746
D5	22	CBF3	0.718014	-0.00237482
D5	23	CBF3	0.720689	-0.00145085
D5	24	CBF3	0.725245	0.00135341
D5	25	CBF3	0.734945	0.00930245
D5	26	CBF3	0.748971	0.0215771
D5	27	CBF3	0.778281	0.0491353
D5	28	CBF3	0.83242	0.101523
D5	29	CBF3	0.929887	0.197239
D5	30	CBF3	1.10404	0.369644
D5	31	CBF3	1.38137	0.645222
D5	32	CBF3	1.75802	1.02012
D5	33	CBF3	2.17754	1.43789
D5	34	CBF3	2.54004	1.79864
D5	35	CBF3	2.81859	2.07543
D5	36	CBF3	3.03145	2.28654
D5	37	CBF3	3.21334	2.46669
D5	38	CBF3	3.34014	2.59173
D5	39	CBF3	3.44501	2.69485
D5	40	CBF3	3.53679	2.78488
D6	1	CBF3	0.620216	-0.00482301
D6	2	CBF3	0.62269	-0.00393975
D6	3	CBF3	0.626396	-0.00182542
D6	4	CBF3	0.629115	-0.000697728
D6	5	CBF3	0.631065	-0.000338695
D6	6	CBF3	0.63237	-0.000625418
D6	7	CBF3	0.634781	0.000194061
D6	8	CBF3	0.636493	0.000315272
D6	9	CBF3	0.639477	0.00170827
D6	10	CBF3	0.640146	0.000785205
D6	11	CBF3	0.642491	0.00153876
D6	12	CBF3	0.643802	0.00125895
D6	13	CBF3	0.64515	0.00101586
D6	14	CBF3	0.646172	0.000445895
D6	15	CBF3	0.646769	-0.00054756
D6	16	CBF3	0.649682	0.000773969
D6	17	CBF3	0.649769	-0.000730656
D6	18	CBF3	0.650554	-0.00153636
D6	19	CBF3	0.653075	-0.000606728
D6	20	CBF3	0.655062	-0.000211038
D6	21	CBF3	0.655408	-0.00145668
D6	22	CBF3	0.656563	-0.00189331
D6	23	CBF3	0.659427	-0.000620358
D6	24	CBF3	0.664692	0.00305371
D6	25	CBF3	0.670398	0.00716855
D6	26	CBF3	0.684277	0.0194561
D6	27	CBF3	0.709709	0.0432969
D6	28	CBF3	0.758695	0.0906911
D6	29	CBF3	0.846574	0.176979
D6	30	CBF3	1.00436	0.333178
D6	31	CBF3	1.26864	0.59586
D6	32	CBF3	1.64826	0.97389
D6	33	CBF3	2.10554	1.42958
D6	34	CBF3	2.53601	1.85846
D6	35	CBF3	2.86755	2.18841
D6	36	CBF3	3.12772	2.44699
D6	37	CBF3	3.3175	2.63518
D6	38	CBF3	3.48261	2.79869
D6	39	CBF3	3.60403	2.91852
D6	40	CBF3	3.70478	3.01769
D7	1	CBF3	0.649116	-0.00492681
D7	2	CBF3	0.65197	-0.00379941
D7	3	CBF3	0.654068	-0.00342834
D7	4	CBF3	0.657093	-0.00213047
D7	5	CBF3	0.659163	-0.00178795
D7	6	CBF3	0.662416	-0.000262333
D7	7	CBF3	0.664641	0.000235639
D7	8	CBF3	0.666148	1.59113e-05
D7	9	CBF3	0.669405	0.0015463
D7	10	CBF3	0.671855	0.00226868
D7	11	CBF3	0.672574	0.0012605
D7	12	CBF3	0.676045	0.00300433
D7	13	CBF3	0.677597	0.00282996
D7	14	CBF3	0.678327	0.00183227
D7	15	CBF3	0.678638	0.00041622
D7	16	CBF3	0.680826	0.000877892
D7	17	CBF3	0.682816	0.00114037
D7	18	CBF3	0.683696	0.000293061
D7	19	CBF3	0.683301	-0.00182853
D7	20	CBF3	0.684978	-0.00187868
D7	21	CBF3	0.685956	-0.002628
D7	22	CBF3	0.689152	-0.00115883
D7	23	CBF3	0.690578	-0.00146057
D7	24	CBF3	0.694608	0.000842585
D7	25	CBF3	0.700496	0.0050041
D7	26	CBF3	0.71209	0.0148705
D7	27	CBF3	0.737425	0.038479
D7	28	CBF3	0.779672	0.0789983
D7	29	CBF3	0.861574	0.159174
D7	30	CBF3	1.00942	0.305293
D7	31	CBF3	1.25485	0.548992
D7	32	CBF3	1.62248	0.914897
D7	33	CBF3	2.07057	1.36127
D7	34	CBF3	2.50411	1.79308
D7	35	CBF3	2.85264	2.13988
D7	36	CBF3	3.11631	2.40182
D7	37	CBF3	3.32726	2.61104
D7	38	CBF3	3.49184	2.7739
D7	39	CBF3	3.61945	2.89978
D7	40	CBF3	3.72795	3.00655
D8	1	CBF4	0.598134	-0.00643126
D8	2	CBF4	0.600854	-0.00430174
D8	3	CBF4	0.604214	-0.00153141
D8	4	CBF4	0.603769	-0.00256725
D8	5	CBF4	0.606081	-0.000845191
D8	6	CBF4	0.605938	-0.00157878
D8	7	CBF4	0.607924	-0.000182753
D8	8	CBF4	0.609728	0.0010313
D8	9	CBF4	0.610165	0.000877128
D8	10	CBF4	0.611994	0.00211663
D8	11	CBF4	0.612484	0.00201575
D8	12	CBF4	0.612648	0.00158966
D8	13	CBF4	0.613038	0.00138906
D8	14	CBF4	0.613274	0.00103503
D8	15	CBF4	0.613199	0.000369809
D8	16	CBF4	0.614685	0.00126587
D8	17	CBF4	0.614484	0.000474287
D8	18	CBF4	0.614081	-0.000518819
D8	19	CBF4	0.614593	-0.000597889
D8	20	CBF4	0.615768	-1.2963e-05
D8	21	CBF4	0.615597	-0.000774208
D8	22	CBF4	0.61623	-0.000731267
D8	23	CBF4	0.61635	-0.00120164
D8	24	CBF4	0.617177	-0.000964865
D8	25	CBF4	0.615738	-0.00299432
D8	26	CBF4	0.618592	-0.000730985
D8	27	CBF4	0.622981	0.00306782
D8	28	CBF4	0.626651	0.00614792
D8	29	CBF4	0.637825	0.0167311
D8	30	CBF4	0.658278	0.0365943
D8	31	CBF4	0.700077	0.0778033
D8	32	CBF4	0.775317	0.152452
D8	33	CBF4	0.905419	0.281965
D8	34	CBF4	1.11579	0.491745
D8	35	CBF4	1.37909	0.754454
D8	36	CBF4	1.61466	0.989437
D8	37	CBF4	1.79635	1.17053
D8	38	CBF4	1.97906	1.35266
D8	39	CBF4	2.13924	1.51224
D8	40	CBF4	2.26862	1.64104
D9	1	CBF4	0.663607	-0.00699158
D9	2	CBF4	0.66729	-0.00437839
D9	3	CBF4	0.671237	-0.00150162
D9	4	CBF4	0.671378	-0.00243037
D9	5	CBF4	0.674431	-0.00044731
D9	6	CBF4	0.674887	-0.00106039
D9	7	CBF4	0.676276	-0.000741618
D9	8	CBF4	0.679518	0.00143051
D9	9	CBF4	0.67975	0.000592533
D9	10	CBF4	0.681033	0.000805153
D9	11	CBF4	0.681698	0.000400269
D9	12	CBF4	0.683842	0.00147471
D9	13	CBF4	0.684769	0.00133161
D9	14	CBF4	0.687131	0.00262373
D9	15	CBF4	0.686974	0.00139714
D9	16	CBF4	0.687383	0.000736013
D9	17	CBF4	0.688429	0.000712599
D9	18	CBF4	0.688959	0.000172949
D9	19	CBF4	0.690935	0.00107889
D9	20	CBF4	0.689812	-0.00111479
D9	21	CBF4	0.691257	-0.000738793
D9	22	CBF4	0.689862	-0.00320367
D9	23	CBF4	0.693197	-0.000938627
D9	24	CBF4	0.692906	-0.00229939
D9	25	CBF4	0.697357	0.00108122
D9	26	CBF4	0.697985	0.000639257
D9	27	CBF4	0.704997	0.00658185
D9	28	CBF4	0.71506	0.015575
D9	29	CBF4	0.735003	0.0344473
D9	30	CBF4	0.775467	0.0738413
D9	31	CBF4	0.849031	0.146336
D9	32	CBF4	0.978599	0.274834
D9	33	CBF4	1.19258	0.487746
D9	34	CBF4	1.4894	0.783491
D9	35	CBF4	1.78061	1.07363
D9	36	CBF4	2.00115	1.2931
D9	37	CBF4	2.2077	1.49858
D9	38	CBF4	2.39564	1.68546
D9	39	CBF4	2.54297	1.83172
D9	40	CBF4	2.66487	1.95254
D10	1	CBF4	0.76133	-0.00490961
D10	2	CBF4	0.763502	-0.0034913
D10	3	CBF4	0.764952	-0.00279634
D10	4	CBF4	0.765728	-0.0027745
D10	5	CBF4	0.767545	-0.00171172
D10	6	CBF4	0.769523	-0.000488729
D10	7	CBF4	0.771767	0.00100153
D10	8	CBF4	0.772406	0.000885984
D10	9	CBF4	0.773539	0.00126444
D10	10	CBF4	0.773562	0.000532758
D10	11	CBF4	0.775499	0.00171605
D10	12	CBF4	0.774957	0.000419083
D10	13	CBF4	0.77744	0.0021477
D10	14	CBF4	0.777034	0.000987464
D10	15	CBF4	0.77896	0.00215908
D10	16	CBF4	0.780099	0.00254397
D10	17	CBF4	0.779296	0.000986825
D10	18	CBF4	0.779455	0.00039128
D10	19	CBF4	0.78034	0.000521423
D10	20	CBF4	0.779486	-0.00108698
D10	21	CBF4	0.780428	-0.000899084
D10	22	CBF4	0.780447	-0.00163464
D10	23	CBF4	0.781542	-0.00129344
D10	24	CBF4	0.781588	-0.00200193
D10	25	CBF4	0.782256	-0.00208899
D10	26	CBF4	0.783697	-0.00140196
D10	27	CBF4	0.788474	0.00262072
D10	28	CBF4	0.796286	0.00967841
D10	29	CBF4	0.811382	0.0240194
D10	30	CBF4	0.841352	0.053235
D10	31	CBF4	0.895127	0.106256
D10	32	CBF4	0.994783	0.205157
D10	33	CBF4	1.15714	0.366762
D10	34	CBF4	1.38558	0.59445
D10	35	CBF4	1.61206	0.820175
D10	36	CBF4	1.7866	0.993956
D10	37	CBF4	1.954	1.16061
D10	38	CBF4	2.10527	1.31112
D10	39	CBF4	2.23115	1.43624
D10	40	CBF4	2.32991	1.53425
D11	1
D11	2
D11	3
D11	4
D11	5
D11	6
D11	7
D11	8
D11	9
D11	10
D11	11
D11	12
D11	13
D11	14
D11	15
D11	16
D11	17
D11	18
D11	19
D11	20
D11	21
D11	22
D11	23
D11	24
D11	25
D11	26
D11	27
D11	28
D11	29
D11	30
D11	31
D11	32
D11	33
D11	34
D11	35
D11	36
D11	37
D11	38
D11	39
D11	40
D12	1
D12	2
D12	3
D12	4
D12	5
D12	6
D12	7
D12	8
D12	9
D12	10
D12	11
D12	12
D12	13
D12	14
D12	15
D12	16
D12	17
D12	18
D12	19
D12	20
D12	21
D12	22
D12	23
D12	24
D12	25
D12	26
D12	27
D12	28
D12	29
D12	30
D12	31
D12	32
D12	33
D12	34
D12	35
D12	36
D12	37
D12	38
D12	39
D12	40
E1	1
E1	2
E1	3
E1	4
E1	5
E1	6
E1	7
E1	8
E1	9
E1	10
E1	11
E1	12
E1	13
E1	14
E1	15
E1	16
E1	17
E1	18
E1	19
E1	20
E1	21
E1	22
E1	23
E1	24
E1	25
E1	26
E1	27
E1	28
E1	29
E1	30
E1	31
E1	32
E1	33
E1	34
E1	35
E1	36
E1	37
E1	38
E1	39
E1	40
E2	1	CBF3	0.649187	0.00250415
E2	2	CBF3	0.650676	0.00247782
E2	3	CBF3	0.65087	0.00115509
E2	4	CBF3	0.652045	0.000814761
E2	5	CBF3	0.652343	-0.000402767
E2	6	CBF3	0.653795	-0.000467482
E2	7	CBF3	0.655843	6.49826e-05
E2	8	CBF3	0.657898	0.00060454
E2	9	CBF3	0.659282	0.00047283
E2	10	CBF3	0.660186	-0.000139651
E2	11	CBF3	0.660933	-0.000908416
E2	12	CBF3	0.662196	-0.00116124
E2	13	CBF3	0.664283	-0.000590393
E2	14	CBF3	0.665293	-0.00109547
E2	15	CBF3	0.667526	-0.000378764
E2	16	CBF3	0.669322	-9.82487e-05
E2	17	CBF3	0.671037	0.00010043
E2	18	CBF3	0.671821	-0.000631738
E2	19	CBF3	0.673398	-0.000570031
E2	20	CBF3	0.678716	0.00323157
E2	21	CBF3	0.685913	0.00891322
E2	22	CBF3	0.699186	0.0206703
E2	23	CBF3	0.72166	0.0416286
E2	24	CBF3	0.766555	0.085008
E2	25	CBF3	0.844762	0.161698
E2	26	CBF3	0.985472	0.300893
E2	27	CBF3	1.21279	0.526692
E2	28	CBF3	1.54335	0.855736
E2	29	CBF3	1.93727	1.24814
E2	30	CBF3	2.30693	1.61629
E2	31	CBF3	2.63493	1.94277
E2	32	CBF3	2.90412	2.21044
E2	33	CBF3	3.11323	2.41804
[truncated: 1,847 more rows]

## Sheet: BioGroup Analysis Result
Block Type	96alum
Chemistry	SYBR_GREEN
Experiment File Name	D:\HAIFENG\1117CBF34Untitled.eds
Experiment Run End Time	2013-01-10 03:05:40 AM CST
Instrument Type	sds7500
Passive Reference	ROX
Biogroup Name	Target Name	Task	RQ	RQ Min	RQ Max	Cт Mean	ΔCт Mean	ΔCт SE	ΔΔCт
Analysis Type	Singleplex
Endogenous Control	CBF3
RQ Min/Max Confidence Level	95.0
Reference Biogroup Name

## Sheet: Technical Analysis Result
Block Type	96alum
Chemistry	SYBR_GREEN
Experiment File Name	D:\HAIFENG\1117CBF34Untitled.eds
Experiment Run End Time	2013-01-10 03:05:40 AM CST
Instrument Type	sds7500
Passive Reference	ROX
Sample Name	Target Name	Task	RQ	RQ Min	RQ Max	Cт Mean	ΔCт Mean	ΔCт SE	ΔΔCт
6-2	CBF4	UNKNOWN				26.5627	1.30078	0.494431
6-3	CBF4	UNKNOWN				27.8029	1.62626	0.141977
12-1	CBF4	UNKNOWN				27.406	1.04371	0.119744
12-2	CBF4	UNKNOWN				31.0243	1.4792	0.296587
3-1	CBF4	UNKNOWN
12-3	CBF4	UNKNOWN				34.6784	0.837985	1.25093
3-2	CBF4	UNKNOWN
24-1	CBF4	UNKNOWN				36.6279	6.68372	0.175331
3-3	CBF4	UNKNOWN
24-2	CBF4	UNKNOWN				29.749	3.84836	0.119896
6-1	CBF4	UNKNOWN				26.9111	2.01936	0.0869988
24-3	CBF4	UNKNOWN				33.1116	3.05269	0.457718
Analysis Type	Singleplex
Endogenous Control	CBF3
RQ Min/Max Confidence Level	95.0
Reference Sample	3-1
