# Supplementary material for: Genome-wide identification of CBF genes and their responses to cold acclimation in Taraxacum kok-saghyz
Source: PeerJ journal article supplement (doi:10.7717/peerj.13429), 2022-05-12
Supplement: Raw_data.zip [file CBF4-CBF5.xls]

## Sheet: Results
Block Type	96alum
Chemistry	SYBR_GREEN
Experiment File Name	D:\HAIFENG\118Untitled.eds
Experiment Run End Time	2021-08-28 18:15:02 PM CST
Instrument Type	sds7500
Passive Reference	ROX
Well	Sample Name	Target Name	Task	Reporter	Quencher	RQ	RQ Min	RQ Max	Cт	Cт Mean	Cт SD	ΔCт	ΔCт Mean	ΔCт SE	HK Control ΔCт Mean	HK Control ΔCт SE	ΔΔCт	Automatic Ct Threshold	Ct Threshold	Automatic Baseline	Baseline Start	Baseline End	Efficiency	Tm1	Tm2	Tm3	Comments	HIGHSD	NOAMP	NOISE	SPIKE	OUTLIERRG	EXPFAIL
A1	3-1	CBF4	UNKNOWN	SYBR	None				30.4226	30.4482	0.0255868							TRUE	0.202308	TRUE	3	39	1	62.1926				N	Y	N	N	N	Y
A2	3-1	CBF4	UNKNOWN	SYBR	None				30.4226	30.4482	0.0255868							TRUE	0.202308	TRUE	3	39	1	64.8037				N	Y	N	N	N	Y
A3	3-1	CBF4	UNKNOWN	SYBR	None				30.4226	30.4482	0.0255868							TRUE	0.202308	TRUE	3	39	1	63.5852				N	Y	N	N	N	Y
A7	3-1	CBF5	UNKNOWN	SYBR	None				28.1878	28.261	0.153334							TRUE	0.181668	TRUE	3	23	1	82.3852				N	N	N	N	N	N
A8	3-1	CBF5	UNKNOWN	SYBR	None				28.4372	28.261	0.153334							TRUE	0.181668	TRUE	3	23	1	82.2111				N	N	N	N	N	N
A9	3-1	CBF5	UNKNOWN	SYBR	None				28.158	28.261	0.153334							TRUE	0.181668	TRUE	3	23	1	82.2111				N	N	N	N	N	N
B1	3-2	CBF4	UNKNOWN	SYBR	None				30.7164	30.6045	0.189081							TRUE	0.202308	TRUE	3	39	1	62.1926				N	Y	N	N	N	Y
B2	3-2	CBF4	UNKNOWN	SYBR	None				30.4154	30.6045	0.189081							TRUE	0.202308	TRUE	3	39	1	63.4111				N	Y	N	N	N	Y
B3	3-2	CBF4	UNKNOWN	SYBR	None				30.6818	30.6045	0.189081							TRUE	0.202308	TRUE	3	39	1	64.9778				N	Y	N	N	N	Y
B4	12-1	CBF4	UNKNOWN	SYBR	None				36.1529	36.1411	0.0249566							TRUE	0.202308	TRUE	3	39	1	63.237				N	Y	N	N	N	Y
B5	12-1	CBF4	UNKNOWN	SYBR	None				36.1161	36.1411	0.0249566							TRUE	0.202308	TRUE	3	31	1	85.1704				N	N	N	N	N	N
B6	12-1	CBF4	UNKNOWN	SYBR	None				36.1543	36.1411	0.0249566							TRUE	0.202308	TRUE	3	38	1	90.3926				N	N	Y	Y	N	Y
B7	3-2	CBF5	UNKNOWN	SYBR	None				28.3632	28.2995	0.103612							TRUE	0.181668	TRUE	3	23	1	82.3852				N	N	N	N	N	N
B8	3-2	CBF5	UNKNOWN	SYBR	None				28.3553	28.2995	0.103612							TRUE	0.181668	TRUE	3	23	1	82.3852				N	N	N	N	N	N
B9	3-2	CBF5	UNKNOWN	SYBR	None				28.1799	28.2995	0.103612							TRUE	0.181668	TRUE	3	23	1	82.2111				N	N	N	N	N	N
B10	12-1	CBF5	UNKNOWN	SYBR	None				30.1037	30.1404	0.395948							TRUE	0.181668	TRUE	3	26	1	82.2111				N	N	N	N	N	N
B11	12-1	CBF5	UNKNOWN	SYBR	None				30.2046	30.1404	0.395948							TRUE	0.181668	TRUE	3	26	1	82.037				N	N	N	N	N	N
B12	12-1	CBF5	UNKNOWN	SYBR	None				30.113	30.1404	0.395948							TRUE	0.181668	TRUE	3	26	1	81.863				N	N	N	N	N	N
C1	3-3	CBF4	UNKNOWN	SYBR	None				30.2639	30.2488	0.0840574							TRUE	0.202308	TRUE	3	39	1	62.7148				N	Y	N	N	N	Y
C2	3-3	CBF4	UNKNOWN	SYBR	None				30.1647	30.2488	0.0840574							TRUE	0.202308	TRUE	3	39	1	63.5852				N	Y	N	N	N	Y
C3	3-3	CBF4	UNKNOWN	SYBR	None				30.3176	30.2488	0.0840574							TRUE	0.202308	TRUE	3	31	1	85.1704				N	N	N	N	N	N
C4	12-2	CBF4	UNKNOWN	SYBR	None				35.5566	36.0132	0.645746							TRUE	0.202308	TRUE	3	31	1	85.1704				Y	N	N	N	N	N
C5	12-2	CBF4	UNKNOWN	SYBR	None				36.4698	36.0132	0.645746							TRUE	0.202308	TRUE	3	31	1	85.1704				Y	N	N	N	N	N
C6	12-2	CBF4	UNKNOWN	SYBR	None				Undetermined	36.0132	0.645746							TRUE	0.202308	TRUE	3	39	1	62.3667				N	Y	N	N	N	Y
C7	3-3	CBF5	UNKNOWN	SYBR	None				28.4175	28.4908	0.124224							TRUE	0.181668	TRUE	3	24	1	82.5593				N	N	N	N	N	N
C8	3-3	CBF5	UNKNOWN	SYBR	None				28.6343	28.4908	0.124224							TRUE	0.181668	TRUE	3	24	1	82.3852				N	N	N	N	N	N
C9	3-3	CBF5	UNKNOWN	SYBR	None				28.4208	28.4908	0.124224							TRUE	0.181668	TRUE	3	24	1	82.3852				N	N	N	N	N	N
C10	12-2	CBF5	UNKNOWN	SYBR	None				30.4607	30.5979	0.312127							TRUE	0.181668	TRUE	3	31	1	82.2111				N	N	N	N	N	N
C11	12-2	CBF5	UNKNOWN	SYBR	None				30.9551	30.5979	0.312127							TRUE	0.181668	TRUE	3	31	1	81.6889				N	N	N	N	N	N
C12	12-2	CBF5	UNKNOWN	SYBR	None				30.3778	30.5979	0.312127							TRUE	0.181668	TRUE	3	30	1	81.863				N	N	N	N	N	N
D1	6-1	CBF4	UNKNOWN	SYBR	None				29.5373	29.4892	0.0997033							TRUE	0.202308	TRUE	3	39	1	64.2815				N	Y	N	N	N	Y
D2	6-1	CBF4	UNKNOWN	SYBR	None				29.3895	29.4892	0.0997033							TRUE	0.202308	TRUE	3	31	1	85.1704				N	N	N	N	N	N
D3	6-1	CBF4	UNKNOWN	SYBR	None				29.5409	29.4892	0.0997033							TRUE	0.202308	TRUE	3	39	1	64.2815				N	Y	N	N	N	Y
D4	12-3	CBF4	UNKNOWN	SYBR	None				35.9063	35.9265	0.0421141							TRUE	0.202308	TRUE	3	39	1	64.8037				N	Y	N	N	N	Y
D5	12-3	CBF4	UNKNOWN	SYBR	None				35.8843	35.9265	0.0421141							TRUE	0.202308	TRUE	3	39	1	65.1519				N	Y	N	N	N	Y
D6	12-3	CBF4	UNKNOWN	SYBR	None				35.9887	35.9265	0.0421141							TRUE	0.202308	TRUE	3	39	1	63.4111				N	N	N	N	N	Y
D7	6-1	CBF5	UNKNOWN	SYBR	None				28.9984	28.768	0.320089							TRUE	0.181668	TRUE	3	24	1	82.7333				N	N	N	N	N	N
D8	6-1	CBF5	UNKNOWN	SYBR	None				28.903	28.768	0.320089							TRUE	0.181668	TRUE	3	24	1	82.5593				N	N	N	N	N	N
D9	6-1	CBF5	UNKNOWN	SYBR	None				28.4025	28.768	0.320089							TRUE	0.181668	TRUE	3	23	1	82.5593				N	N	N	N	N	N
D10	12-3	CBF5	UNKNOWN	SYBR	None				29.4666	29.4589	0.460861							TRUE	0.181668	TRUE	3	28	1	82.2111				N	N	N	N	N	N
D11	12-3	CBF5	UNKNOWN	SYBR	None				29.4533	29.4589	0.460861							TRUE	0.181668	TRUE	3	28	1	82.037				N	N	N	N	N	N
D12	12-3	CBF5	UNKNOWN	SYBR	None				29.4567	29.4589	0.460861							TRUE	0.181668	TRUE	3	27	1	82.037				N	N	N	N	N	N
E1	6-2	CBF4	UNKNOWN	SYBR	None				29.2778	29.3099	0.705488							TRUE	0.202308	TRUE	3	30	1	85.1704				Y	N	N	N	N	N
E2	6-2	CBF4	UNKNOWN	SYBR	None				29.3266	29.3099	0.705488							TRUE	0.202308	TRUE	3	31	1	85.1704				Y	N	N	N	N	N
E3	6-2	CBF4	UNKNOWN	SYBR	None				29.3254	29.3099	0.705488							TRUE	0.202308	TRUE	3	32	1	85.1704				Y	N	N	N	N	N
E4	24-1	CBF4	UNKNOWN	SYBR	None				34.9536	35.0073	0.0536283							TRUE	0.202308	TRUE	3	39	1	65.8481				N	Y	N	N	N	Y
E5	24-1	CBF4	UNKNOWN	SYBR	None				34.9455	35.0073	0.0536283							TRUE	0.202308	TRUE	3	32	1	76.4667				N	N	N	N	N	N
E6	24-1	CBF4	UNKNOWN	SYBR	None				35.1226	35.0073	0.0536283							TRUE	0.202308	TRUE	3	39	1	62.1926				N	Y	N	N	N	Y
E7	6-2	CBF5	UNKNOWN	SYBR	None				27.2887	27.1966	0.144874							TRUE	0.181668	TRUE	3	22	1	82.9074				N	N	N	N	N	N
E8	6-2	CBF5	UNKNOWN	SYBR	None				27.2716	27.1966	0.144874							TRUE	0.181668	TRUE	3	22	1	82.7333				N	N	N	N	N	N
E9	6-2	CBF5	UNKNOWN	SYBR	None				27.0297	27.1966	0.144874							TRUE	0.181668	TRUE	3	22	1	82.7333				N	N	N	N	N	N
E10	24-1	CBF5	UNKNOWN	SYBR	None				27.8549	27.9027	0.0619934							TRUE	0.181668	TRUE	3	25	1	82.5593				N	N	N	N	N	N
E11	24-1	CBF5	UNKNOWN	SYBR	None				27.9727	27.9027	0.0619934							TRUE	0.181668	TRUE	3	25	1	82.2111				N	N	N	N	N	N
E12	24-1	CBF5	UNKNOWN	SYBR	None				27.8804	27.9027	0.0619934							TRUE	0.181668	TRUE	3	25	1	82.037				N	N	N	N	N	N
F1	6-3	CBF4	UNKNOWN	SYBR	None				29.8895	29.8863	0.0535441							TRUE	0.202308	TRUE	3	31	1	84.9963				N	N	N	N	N	N
F2	6-3	CBF4	UNKNOWN	SYBR	None				29.9367	29.8863	0.0535441							TRUE	0.202308	TRUE	3	39	1	63.063				N	Y	N	N	N	Y
F3	6-3	CBF4	UNKNOWN	SYBR	None				29.8328	29.8863	0.0535441							TRUE	0.202308	TRUE	3	39	1	64.4556				N	Y	N	N	N	Y
F4	24-2	CBF4	UNKNOWN	SYBR	None				34.148	34.1262	0.0184699							TRUE	0.202308	TRUE	3	31	1	85.1704				N	N	N	N	N	N
F5	24-2	CBF4	UNKNOWN	SYBR	None				34.1228	34.1262	0.0184699							TRUE	0.202308	TRUE	3	39	1	64.8037				N	Y	N	N	N	Y
F6	24-2	CBF4	UNKNOWN	SYBR	None				34.1077	34.1262	0.0184699							TRUE	0.202308	TRUE	3	39	1	62.0185				N	Y	N	N	N	Y
F7	6-3	CBF5	UNKNOWN	SYBR	None				27.8491	27.7718	0.0880297							TRUE	0.181668	TRUE	3	23	1	82.7333				N	N	N	N	N	N
F8	6-3	CBF5	UNKNOWN	SYBR	None				27.676	27.7718	0.0880297							TRUE	0.181668	TRUE	3	23	1	82.7333				N	N	N	N	N	N
F9	6-3	CBF5	UNKNOWN	SYBR	None				27.7904	27.7718	0.0880297							TRUE	0.181668	TRUE	3	23	1	82.5593				N	N	N	N	N	N
F10	24-2	CBF5	UNKNOWN	SYBR	None				279.373	27.3968	0.20384							TRUE	0.181668	TRUE	3	24	1	82.3852				N	N	N	N	N	N
F11	24-2	CBF5	UNKNOWN	SYBR	None				27.6115	27.3968	0.20384							TRUE	0.181668	TRUE	3	25	1	82.2111				N	N	N	N	N	N
F12	24-2	CBF5	UNKNOWN	SYBR	None				27.2059	27.3968	0.20384							TRUE	0.181668	TRUE	3	24	1	82.037				N	N	N	N	N	N
G4	24-3	CBF4	UNKNOWN	SYBR	None				35.0995	35.0659	0.00249139							TRUE	0.202308	TRUE	3	39	1	63.7593				N	Y	N	N	N	Y
G5	24-3	CBF4	UNKNOWN	SYBR	None				35.0348	35.0659	0.00249139							TRUE	0.202308	TRUE	3	39	1	64.1074				N	Y	N	N	N	Y
G6	24-3	CBF4	UNKNOWN	SYBR	None				35.0634	35.0659	0.00249139							TRUE	0.202308	TRUE	3	39	1	62.5407				N	Y	N	N	N	Y
G10	24-3	CBF5	UNKNOWN	SYBR	None				27.1476	27.115	0.0461336							TRUE	0.181668	TRUE	3	24	1	82.037				N	N	N	N	N	N
G11	24-3	CBF5	UNKNOWN	SYBR	None				27.0824	27.115	0.0461336							TRUE	0.181668	TRUE	3	24	1	81.863				N	N	N	N	N	N
G12	24-3	CBF5	UNKNOWN	SYBR	None				27.115	27.115	0.0461336							TRUE	0.181668	TRUE	3	34	1	85.3444				N	N	Y	Y	N	N
Analysis Type	Singleplex
Endogenous Control	CBF4
RQ Min/Max Confidence Level	95.0
Reference Sample	3-1

## Sheet: Raw Data
Block Type	96alum
Chemistry	SYBR_GREEN
Experiment File Name	D:\HAIFENG\118Untitled.eds
Experiment Run End Time	2021-08-28 18:15:02 PM CST
Instrument Type	sds7500
Passive Reference	ROX
Well	Cycle	1	2	3	4	5
A1	1	199998	54580.8	33685.4	327532	960.196
A2	1	184679	46342.1	33056.5	290657	1305.92
A3	1	315722	69152.2	52161.8	417247	2079.43
A4	1	334219	58611	57995.6	443530	2585.72
A5	1	195239	43317.9	44537.9	348052	1364.98
A6	1	225651	48867.9	48378.1	367229	1378.29
A7	1	226010	51419.5	48653.8	361358	2172.57
A8	1	216474	51110.2	51297.7	395089	2180.19
A9	1	244334	59790.8	55455.9	433212	1923.08
A10	1	259932	66597.2	55337.4	443848	1979.67
A11	1	413477	101760	73568.4	607890	0
A12	1	234713	65224.6	48055.4	440397	1318.28
B1	1	186804	47732.8	35395.5	314207	1719.81
B2	1	197774	49365.3	39991.9	334290	1141.33
B3	1	315392	70276	60485.9	461109	2121.44
B4	1	266605	54994.7	54862.3	406839	8283.87
B5	1	171120	39518.3	43407.1	321414	1523.46
B6	1	199358	16465.8	9499.07	8220.89	2227.7
B7	1	198657	43124	49138.5	350093	2101.95
B8	1	214544	46045.2	52983.2	378821	1980.06
B9	1	218065	47831.2	53276.8	393779	1503.1
B10	1	298072	59735.1	63408.9	472384	2687.53
B11	1	441879	91401.5	82177.4	627534	3999.73
B12	1	235178	57763.1	50181.1	440285	1747.63
C1	1	227236	62997.4	43857.6	369270	1723.42
C2	1	224298	56808	47137.5	370603	1703.1
C3	1	332728	77678.6	65993.3	470894	2601.45
C4	1	250002	53221.8	55577.8	392624	2626.49
C5	1	199899	46463.2	58854.4	422417	1863.53
C6	1	209580	45411.8	54286.4	368726	2173.59
C7	1	220778	53257.1	58196.9	395311	2150.78
C8	1	228576	56411.1	59462.3	403560	1483.71
C9	1	231917	56717.1	59726.4	418998	1405.11
C10	1	262176	62699.9	66203.1	484012	2015.22
C11	1	372277	85685.9	80744	608868	3005.51
C12	1	231412	61592.5	56295.9	480523	1383.97
D1	1	253444	66192.8	50654.3	413616	2288.6
D2	1	224675	55068.8	49491.4	376735	1241.92
D3	1	360840	82860.4	74379.7	506228	3094.87
D4	1	316608	70632.1	67689.2	443425	2920.48
D5	1	243952	56818.9	61498.2	399738	2168.1
D6	1	244680	57324.4	60384.8	379704	1812.64
D7	1	244785	60046.1	61575.8	377174	3240.9
D8	1	236150	55214.2	62660.9	404351	1625.69
D9	1	242021	58655.3	62387	410597	2293.41
D10	1	272606	65534.8	68086.2	473804	1913.43
D11	1	388122	90032.8	82304.4	596403	2290.1
D12	1	270043	69915.1	60628	490359	2094.55
E1	1	290655	69148.2	55368.7	440286	2390.59
E2	1	267589	62688.8	55191.3	406169	1663.54
E3	1	407065	93609.1	85194.3	558282	3267.55
E4	1	404598	93317.9	90500.9	566235	3423.31
E5	1	258865	64395	68302.1	435102	1470.71
E6	1	279877	66172.1	75170.6	462446	2164.37
E7	1	253685	61191.2	71161.2	438258	2193.86
E8	1	278643	67767.5	77210.1	484998	2138.47
E9	1	266586	66291.3	70145.2	457267	2079.46
E10	1	291104	71589.3	76498.4	529185	2255.29
E11	1	419629	100927	96085.6	696170	3038.62
E12	1	281901	76216	67720.9	547593	1921.74
F1	1	258484	66391.6	56749.9	442134	1545.31
F2	1	239892	57757.7	54896.7	415279	970.187
F3	1	426738	96821.7	90279.9	585486	3165.41
F4	1	430266	93318.1	86863	542384	3522.61
F5	1	305293	70775.6	74054.1	475973	2242.18
F6	1	273343	61626.5	69840.2	432253	2300.36
F7	1	288709	70562.1	85787	539770	2815.35
F8	1	288944	70022	83132.3	529179	2945.01
F9	1	293166	72666	82248.8	548821	2292.87
F10	1	314781	77581.3	82547.3	586967	2130.67
F11	1	446041	108987	100579	728346	1666.1
F12	1	287803	78353.7	69965.3	577210	1933.82
G1	1	293549	64262.7	55249.8	450267	2480.37
G2	1	281413	67103.4	59496.2	453543	1712.74
G3	1	519391	117114	102605	692942	3664.44
G4	1	481131	101324	97129.4	628948	3935.65
G5	1	310579	70261.6	75285.7	496504	2376.59
G6	1	316719	67766.4	75931.3	480951	2838.71
G7	1	284160	68397.4	79706.8	510749	2613.56
G8	1	279925	67156.9	75405.4	491233	3222.25
G9	1	299606	74580.3	81035.4	551802	2668.11
G10	1	280486	63560.8	63284.6	451579	1214.51
G11	1	413875	92053.3	76848.7	543288	2672.57
G12	1	266113	20036.9	9626.42	7789.64	1819.93
H1	1	271003	68447.1	57598.2	505328	2247.66
H2	1	265418	64995.6	58901.7	474851	2179.7
H3	1	486042	112454	97608.2	696822	3869.8
H4	1	445243	37781.5	20517.4	16293.2	4746.39
H5	1	272585	22795.2	12516.4	10411.1	2907.05
H6	1	290853	24281	13257.8	10577.4	2874.4
H7	1	330605	78574.8	92716	641984	2487.69
H8	1	306226	74426.7	81564.6	568799	2435.12
H9	1	321488	81745.1	85467	615908	2791.18
H10	1	347629	27471.3	13883	11323.8	2954.97
H11	1	500040	40121.1	20241	15701.7	4165.66
H12	1	265587	66374.5	52200.7	453690	1672.22
A1	2	199341	55552.4	33849.9	328053	966.024
A2	2	184159	46471.6	33107.9	290435	1305.92
A3	2	316552	69006.1	52029.8	417821	2221.65
A4	2	334685	58744.2	58169.8	443918	2603.93
A5	2	195757	44002.5	44535.4	347744	1046.62
A6	2	226754	49005.4	48480.8	366581	1648.01
A7	2	226773	51813.5	48649	359555	1959.42
A8	2	216618	51185.2	51398.8	393507	1949.39
A9	2	244142	59912.6	55374.6	430737	2094.67
A10	2	260823	67070.8	55475	442638	2011.87
A11	2	412476	101572	73670.2	607362	0
A12	2	233281	65569.2	48262.7	440396	1301.7
B1	2	186564	47584.4	35270.5	313175	1542.63
B2	2	198381	49630.5	39855.5	333768	1478.19
B3	2	316970	70870.1	60905.8	461558	2299.95
B4	2	268344	55207.1	55428.4	408765	9186.76
B5	2	171756	39771.7	43516	321103	1744.22
B6	2	199333	16115.9	9330.93	8321.14	2185.73
B7	2	200002	43864.8	49436.9	350205	2221.23
B8	2	215908	46577.8	53266.5	379432	2075.52
B9	2	218569	48236.6	53275.2	394019	1343.75
B10	2	300448	60664.5	63528.6	473358	2825.82
B11	2	442083	91533.9	82223.4	626397	3743.14
B12	2	235017	57794.9	50106	438396	1924.52
C1	2	227676	63296.8	44023.3	368057	1763.99
C2	2	223331	57052.1	46817.4	369844	1791.16
C3	2	333726	77875.9	66461.6	471811	2471.29
C4	2	251123	53117	55642.9	393438	2635.28
C5	2	200508	47039.2	59112.7	422920	1961.09
C6	2	211164	45970.8	54476.6	369415	2198.48
C7	2	222706	54312	58707	396128	2227.1
C8	2	229687	56932.7	59761.5	404811	1531.54
C9	2	233144	57170.3	59894.9	419550	1139.79
C10	2	264645	63259.9	66464.6	484962	2226.47
C11	2	374304	85976.9	81040	609956	3377.24
C12	2	230831	61673.5	56351.2	479212	1700.31
D1	2	254108	67068.9	50840.5	412884	2132.09
D2	2	224711	55231.5	49577.7	376358	916.849
D3	2	362411	83134.2	74731.6	507239	2844.59
D4	2	318461	70832	67938.9	444316	2936.27
D5	2	245013	57439.8	61738.9	400309	2233.68
D6	2	247403	58230.8	60409.5	379926	1929.71
D7	2	246201	60202.6	61819.6	377335	3172.14
D8	2	237703	55739.9	62962.1	405703	1759.5
D9	2	242871	58950.3	62581.4	411702	2329.67
D10	2	274255	65942.5	68288.9	474401	2015.67
D11	2	391238	90393.1	82981.8	600410	2437.45
D12	2	269801	69630.6	60520.6	489467	2268.52
E1	2	291255	70136.3	55556.3	439988	2345.48
E2	2	268128	63405.9	55052.9	405312	1828.64
E3	2	409839	94505.7	85576.4	560482	3278.44
E4	2	406528	93662.8	90740.5	568357	3360.48
E5	2	261176	64771.6	68558.4	435600	1565.3
E6	2	282032	66832.7	75389.6	462106	2471.05
E7	2	255708	61729.7	71322.4	439606	2121.64
E8	2	279795	68089.3	77418.8	486019	2281.92
E9	2	268552	67181.2	70747.7	459110	2394.37
E10	2	293185	72241.4	76690	529856	2175.41
E11	2	422416	101630	96590.2	698121	2986.59
E12	2	281626	76793.5	67977.7	548086	2016.77
F1	2	258829	66847	56554.8	441910	1830.05
F2	2	240115	58271.5	54946.2	414842	1193.72
F3	2	429730	97269.1	90842.9	587102	3127.87
F4	2	431962	93829.7	87568.3	543356	3973.99
F5	2	307061	71807.2	74258.9	476238	1813.47
F6	2	274828	62189.5	70023.9	432388	2375.1
F7	2	291444	71447	86316.5	539790	2572.45
F8	2	291167	70565.5	83706.2	530538	3208.14
F9	2	295483	73088.3	82919.2	550601	2183.94
F10	2	317564	78786.6	83047.1	588777	2146.66
F11	2	448551	109618	101275	729488	1924.54
F12	2	288930	78727.3	70135	577102	1880.53
G1	2	293268	65012	55212.6	449349	1994.23
G2	2	281411	67512.1	59296.6	452497	1540.97
G3	2	522209	117361	102834	694334	3611.41
G4	2	482456	101193	97401.3	628178	3852.73
G5	2	312388	71194.1	75665.2	496763	2484.05
G6	2	318259	68573.8	76162.2	481425	2810
G7	2	286435	69084.8	79876.6	510729	2794.77
G8	2	282046	67432.2	75678.5	492092	3068.72
G9	2	301774	74913.1	81675.7	552394	2756.37
G10	2	280844	62963.9	63269.4	451683	1265.79
G11	2	413767	91400.5	77132.6	544332	3116.18
G12	2	264993	20235.7	9561.19	7894.53	1854.48
H1	2	270652	68731.5	57398.5	505319	2286.73
H2	2	265861	65838.8	58973.9	474274	2217.48
H3	2	486629	113097	97848.5	697439	4192.98
H4	2	444084	37794.8	20421	16205.9	4508.41
H5	2	271862	23007.5	12463.4	10471.7	2890.36
H6	2	289740	24093.8	13300.4	10533.4	3004.89
H7	2	331970	79575	93159.2	643125	2731.24
H8	2	307065	74891.4	81670.2	568038	2692.08
H9	2	323052	82460.1	85559.5	614914	3083.47
H10	2	346587	27254.5	13896.7	11210.4	3380.99
H11	2	498955	40075.4	20367	16078.7	4234.76
H12	2	265952	66521.4	52340.1	453756	1503.94
A1	3	198459	55385	33680.9	326057	1108.82
A2	3	184567	46574.8	33273	289332	1052.16
A3	3	315964	68716.9	52277.5	417642	2191.25
A4	3	334565	58917.4	58122.1	442709	2800.76
A5	3	196168	44031.7	44757.5	347262	1190.81
A6	3	227492	49447.5	48684	365997	1408
A7	3	227220	52361	48676.3	359368	2132.35
A8	3	216299	51393.7	51262.9	393137	1985.09
A9	3	243893	59820.3	55338.2	428577	2219.02
A10	3	260434	66750	55371.3	441700	1839.77
A11	3	412729	101309	73706.7	605044	0
A12	3	231734	64787.2	47777.2	435396	1296.18
B1	3	186292	47364	35254.2	311857	1502.67
B2	3	199447	50041.9	39883	334685	1444.95
B3	3	317775	71106.2	61084.7	461876	2142.04
B4	3	269259	55558.7	55730.5	409629	9078.11
B5	3	172659	39789.9	43549.8	321736	1648.16
B6	3	199262	16383.2	9393.38	8342.97	2031.57
B7	3	201351	44054.6	49370.4	350067	2063.72
B8	3	216185	46855.5	53259.4	379230	2063.59
B9	3	217506	48106.4	53069.6	391634	1821.79
B10	3	300719	60796.4	63349.1	472238	2581.58
B11	3	440138	91112.6	82075.1	624309	3960.72
B12	3	232030	57490.5	49853.7	434538	2147.32
C1	3	226544	63293	43687.1	365464	1418.57
C2	3	224096	57448.8	46894	369039	1834.67
C3	3	334602	77953.2	66793.8	472551	2561.19
C4	3	252110	53785	55877.2	393872	2785.7
C5	3	201252	47082.5	59330.9	422331	2052.39
C6	3	212471	46508.8	54607.4	369722	2086.87
C7	3	223808	54535.1	58786.6	396030	2027.7
C8	3	229784	56997.3	59957.1	405082	1745.97
C9	3	234001	57482.3	59993.4	419311	1150.54
C10	3	265611	63807.3	66855.3	486243	2245.6
C11	3	375278	86165.6	81106.4	610964	3199.54
C12	3	230518	61497.6	56008.3	477507	1419.12
D1	3	254992	67199.7	50839.3	412487	1814.12
D2	3	224423	55306.6	49574.6	375510	1179.52
D3	3	362764	83343.8	75158.7	507477	2662.48
D4	3	319478	71099.1	68366.6	445440	2861.26
D5	3	246186	57857.4	61862.7	400016	2389.05
D6	3	248443	58856.3	60789	380323	2323.14
D7	3	247001	60778.4	62041.1	377210	3361.74
D8	3	238191	55793.4	63060.5	406412	1768.69
D9	3	243973	59438.9	62682.8	412379	2399.65
D10	3	274848	66271.7	68645.6	475448	1975.12
D11	3	391465	90921.2	83243.6	600337	2447.08
D12	3	267876	69152.7	60114.1	485165	1706.08
E1	3	291309	70357.7	55475.1	438829	2378.28
E2	3	268702	63538.8	55330.8	405675	2042.7
E3	3	411791	95123.8	86032.3	562401	3179.35
E4	3	408522	93986.5	91067.4	569091	3536.64
E5	3	262614	65384.7	68849.7	436583	1993.5
E6	3	283247	67479.5	75768.2	463069	2588.26
E7	3	256777	62413.6	71569.2	440041	2123.59
E8	3	281118	68470.9	77693.2	487078	2291.07
E9	3	270445	67355	70868.1	459612	2458.63
E10	3	294807	73293.4	77065.3	531466	1996.82
E11	3	423352	101657	96859	698942	3069.12
E12	3	279192	76550.6	67461.5	543954	1831.58
F1	3	257129	66485.6	56326.5	437788	1994.66
F2	3	241077	58546.1	54980.4	413518	1557.68
F3	3	431891	97925.9	91356.8	589336	3185.23
F4	3	433246	94254.5	87878.4	544813	3403.34
F5	3	308098	72192.3	74579.2	477067	2273.27
F6	3	276215	62420.8	70253.8	433655	2268.7
F7	3	292469	71943.4	86490.2	541690	2670.95
F8	3	292261	71139.4	83837.2	531553	3593.72
F9	3	296471	73993.2	83401.1	551974	2110.6
F10	3	319068	79206.8	83505.4	590322	1867.4
F11	3	449864	109867	101504	732567	1747.82
F12	3	287982	78980.5	70051.5	574713	2237.21
G1	3	291661	64539.3	54854.7	446751	2957.48
G2	3	282073	67667.9	59487.5	451696	1992.47
G3	3	523454	117837	103093	694404	3660.65
G4	3	483896	101431	97583.6	630118	3911.96
G5	3	314023	71934.9	75879.7	497546	2585.75
G6	3	319501	68992.6	76507.2	481839	2847.96
G7	3	287971	69978.2	80492	512908	2457.57
G8	3	282710	67855	76027	493458	3236.83
G9	3	303575	75229.7	81990.8	553451	2711.73
G10	3	280904	62794.8	63517	452606	1597.52
G11	3	414919	91461.7	77419	545104	3013.44
G12	3	264060	20129.9	9627.73	7943.23	1492.96
H1	3	269403	68700.9	57577.7	503981	1958.84
H2	3	265431	65972.3	58823.7	472217	2049.19
H3	3	486873	113036	97878.6	696676	3841.29
H4	3	442846	37458.2	20411.6	16371.9	4636.34
H5	3	271141	22979.5	12702.3	10215.4	2993.41
H6	3	288260	24148.5	13254.3	10428.4	2930.71
H7	3	332361	79627	93028.5	641278	2563.08
H8	3	307380	75199	81905.5	568981	2913.8
H9	3	323552	82396.6	85516.9	612496	3026.73
H10	3	345550	27107.4	14120.2	11283.1	3052.52
H11	3	496698	39851.1	20253.1	16148.2	4347.7
H12	3	264664	66731.5	52107.7	451378	1349.82
A1	4	198976	55634.5	33659.9	325777	731.439
A2	4	184628	47080.4	33229.3	289180	1192.31
A3	4	317264	69021.6	52558.6	417632	2469.81
A4	4	335154	59170.6	58159.2	443349	2628.2
A5	4	196951	44182.6	44688.1	347324	1424.92
A6	4	228427	49732.6	48895.1	366524	1719.46
A7	4	228648	52676.7	48800.1	359207	1895.07
A8	4	216449	51691.3	51342.4	392730	2015.81
A9	4	244644	60203.9	55336.3	428299	2027.19
A10	4	261159	67533.2	55665.4	441634	2055.15
A11	4	413512	101440	73754.7	604304	0
A12	4	230929	65178.2	47548.7	433512	1432.98
B1	4	186461	47803.4	35270.5	311691	1777.09
B2	4	200030	50393.7	40134.1	334794	1786.24
B3	4	318955	71426	61121.3	462710	2335.26
B4	4	270484	55779.6	55796.9	411276	9094.49
B5	4	173164	40338.8	43685.8	321919	1814.16
B6	4	199401	16400.9	9522.29	8367.23	2173.62
B7	4	202149	44617.3	49517.7	350342	2407.8
B8	4	216951	47009.5	53464.2	379418	1578.32
B9	4	218168	48364.4	53275.2	391672	1460.39
B10	4	301106	61177.6	63544.7	471976	2833
B11	4	440451	91427.5	82077.2	624190	3534.78
B12	4	232234	57625	49924.4	434021	1892.06
C1	4	226884	63789.4	43768.7	364208	1878.31
C2	4	224485	58225.8	47373.7	369249	1656.48
C3	4	335441	78565.6	66954.2	472662	2637.04
C4	4	253280	54030.3	56172.6	394489	2474.12
C5	4	202183	47474.3	59372.9	423332	1905.6
C6	4	213049	46925.7	54873.9	370218	1943.14
C7	4	224697	55120.2	58761.1	397033	2149.96
C8	4	230723	57351.1	60037.8	405199	1717.93
C9	4	234671	57960.2	60201.9	419160	1400.15
C10	4	266617	64320.7	66955.1	486567	2236.91
C11	4	376146	86172.7	81494.9	611796	3011.64
C12	4	230576	61872.7	56243.9	477208	1463.06
D1	4	255081	67515.6	51129.4	411514	1874.51
D2	4	225365	55891.3	49559.4	375087	1007.43
D3	4	363692	83475.3	75317.1	508753	3034.84
D4	4	320784	71272.6	68463.4	446376	3316.26
D5	4	246993	58106.7	61959	401105	2073.27
D6	4	249937	59560	60877.4	381166	2195.51
D7	4	247670	60906.1	62139.2	378287	3213.4
D8	4	238989	56038.8	63528.5	407290	1715.17
D9	4	244905	59664.7	63026.5	413494	2248.73
D10	4	276023	66610.6	68727.9	476852	2073.84
D11	4	393244	91263.8	83558.6	603321	2103.27
D12	4	268240	69640.2	60509.4	485391	1665.56
E1	4	291686	70386.4	55427.2	438141	1868.46
E2	4	269885	64108.5	55462.5	406540	1784.23
E3	4	413895	95692.4	86493.6	564150	3445.03
E4	4	409048	94172.6	91592	570093	3620.79
E5	4	263533	65638.3	68956.8	436959	1791.1
E6	4	284401	67837	75901.5	463766	2530.63
E7	4	257720	62857.7	71924.1	441004	2163.61
E8	4	282516	69195.8	78028	488273	2094.72
E9	4	271717	68139.3	71384.9	460786	2325.51
E10	4	296517	73621.7	77218.8	532132	2242.72
E11	4	424047	102065	97242.5	700064	3090.65
E12	4	278489	76712.2	67540.2	543313	1816.15
F1	4	257649	67015.8	56105.7	436367	1340.65
F2	4	242114	58786.6	55160.7	413797	1013.49
F3	4	433528	98756.5	91497.3	589994	2816.02
F4	4	434434	94830.2	88252.4	546052	3533.92
F5	4	308772	72607.7	74743.1	476636	2114.64
F6	4	276401	62734.8	70476.8	433959	2327.62
F7	4	293440	72427	86693.1	541528	2430.92
F8	4	293338	72033	84208.2	531988	3656.46
F9	4	297960	74298.7	83607.8	552763	2009.23
F10	4	320371	79837.7	83938.2	592212	2109.36
F11	4	452102	110646	101972	734046	2056.32
F12	4	287979	79037.8	70008	574081	2239.79
G1	4	290512	64765	54569.7	444700	1888.88
G2	4	283444	68384.3	59679.6	452002	1758.13
G3	4	524853	118712	103541	696068	4021.8
G4	4	485991	102144	98138.2	630518	3647.41
G5	4	315195	72711.4	76157.1	497699	2639.48
G6	4	320469	69941.4	76462.5	482266	2639.64
G7	4	289352	70072.7	80615.7	513572	2831.2
G8	4	283818	68379.1	76162.1	493963	3260.15
G9	4	304509	75814.4	82091.8	554760	2771.59
G10	4	281197	63421.1	63689.6	452811	1206.87
G11	4	416266	91858.3	77694.4	544961	3084.76
G12	4	262620	19998.3	9580.76	7568.61	1826.1
H1	4	268429	68796.4	57265.3	502129	2815.09
H2	4	265729	65825.2	58649.1	470959	2485.36
H3	4	486746	113212	98013.2	694035	4201.3
H4	4	441870	37449.6	20482.8	16306.5	4505.59
H5	4	269974	22768.1	12437.5	10467.8	3174.98
H6	4	287507	23864.1	13239.2	10495.7	2978.97
H7	4	332500	79977.7	92964	640220	2962.23
H8	4	308215	75540.9	81818.4	566923	2475.01
H9	4	323410	82931.8	85617.9	611406	2897.18
H10	4	344468	26921.5	14059.3	11288.1	2975.96
H11	4	496758	40084	20249.1	15934.3	4681.22
H12	4	263652	66250.1	51713.6	450130	1702.33
A1	5	199033	55977.5	33466.9	324574	897.543
A2	5	185022	47052.8	33199.8	288328	1247.52
A3	5	317785	69593.9	52581.9	418197	2152.99
A4	5	335802	59326.9	58405.1	443340	2777.35
A5	5	197674	44643.3	44857.1	347353	1453.27
A6	5	229064	50379	48992.2	366414	1461.78
A7	5	229466	53098.4	48919.1	359511	2062.37
A8	5	217333	51998.7	51551.2	392331	1960.18
A9	5	245121	60527.6	55469.3	428438	2199.74
A10	5	261713	67726.5	55541.8	441368	2146.74
A11	5	414635	101795	73758.2	604363	0
A12	5	231502	65343.6	47697.7	432306	1695.53
B1	5	186230	47832.7	35254.2	311434	1715.81
B2	5	200601	50630.9	40362.3	335082	1546.89
B3	5	319790	71919.2	61211.8	463546	2433.33
B4	5	270698	56024.3	55961.7	411898	9269.55
B5	5	173971	40665.6	43819.2	322113	1816.69
B6	5	198936	16317.5	9428.61	8340.55	2138.11
B7	5	203068	44895	49748.1	350533	1874.86
B8	5	218181	47363.1	53836.2	380476	1918.01
B9	5	218950	48797.5	53134.6	392274	1485.85
B10	5	302707	61872.9	63649.2	473022	2913.82
B11	5	440941	91886.4	82293.9	625150	3749.29
B12	5	232579	57989.6	49842.5	432747	1996.18
C1	5	227183	64025.3	43862.5	364415	1636.15
C2	5	225417	58365.3	47117.6	370170	1738.32
C3	5	336596	78961.2	67079	474319	2604.26
C4	5	253396	54255.7	56291.2	395336	2945.89
C5	5	202576	47840.2	59257.6	423183	1914.55
C6	5	214252	47224.6	55058.5	370974	2292.43
C7	5	225717	55404	58834.3	396741	2387.94
C8	5	231544	57619.8	60225.3	405731	1717.93
C9	5	235551	58187.2	60322.4	420107	1391.89
C10	5	267851	65027.4	67307.8	487866	2119.54
C11	5	377607	86860.2	81552.3	613361	3226.1
C12	5	231210	62062.5	56331.3	476763	1381.77
D1	5	256094	68135	51026.8	411375	1529.43
D2	5	226125	56552.2	49610.2	375386	1022.52
D3	5	365127	84247.5	75440.4	509400	2986.01
D4	5	320972	71964.9	68713.1	447884	3271.85
D5	5	247807	58562	62184	401365	2363.83
D6	5	251448	60107.4	61216	381626	2089
D7	5	248365	61095	62097.4	378586	3114.18
D8	5	239588	56083.3	63691.2	407783	1721.03
D9	5	245922	60057	63274.6	414040	2467.11
D10	5	277698	67353.6	68991.7	477418	2041.23
D11	5	394739	91958.8	83643.6	604387	2397
D12	5	268685	70018.2	60403	485371	2019.42
E1	5	291787	70885.2	55532.3	437865	2270.3
E2	5	270551	64734	55509.4	407415	1809.28
E3	5	414835	95998.3	86591	564861	3368.81
E4	5	409808	94950.2	91780.9	571466	3462.58
E5	5	264398	66116.9	69153.9	437126	1686.34
E6	5	285339	68553.8	75943.4	463796	2220.04
E7	5	258702	63552.9	71961.4	441125	2238.75
E8	5	283775	69735.3	78240.8	489550	2677.67
E9	5	272764	68642.5	71374	461412	2207.08
E10	5	298030	74807.4	77549.7	532318	2439.26
E11	5	426042	102833	97430.1	699905	3234.2
E12	5	279239	76936.5	67468.1	542019	1881.12
F1	5	257740	67214.8	55995.3	434939	1821.15
F2	5	243233	59671	55207.9	414158	1219.46
F3	5	434750	99624.9	91849.5	591067	3262.41
F4	5	435402	95209.6	88263.5	546949	3364.27
F5	5	309920	72939.1	74995.1	477265	1949.59
F6	5	277485	63286.1	70538.9	434407	2360.15
F7	5	294413	73157.4	86901.7	542226	2845.95
F8	5	294779	72749.6	84237.2	533123	3335.65
F9	5	298519	75483.7	83997.6	553681	2360.81
F10	5	321473	80393	84116.8	592835	2110.42
F11	5	454027	111472	101999	736316	2103.31
F12	5	288864	79543.2	70179.5	573100	2274.17
G1	5	290410	65288.6	54524.7	443913	2352.44
G2	5	284303	68856.9	59675.9	452484	1712.74
G3	5	526494	119352	103570	697584	4019.27
G4	5	486238	102648	98288	632822	3920.84
G5	5	317077	73312.1	76155.2	498348	2355.48
G6	5	321655	70258	76526.4	482505	3044.25
G7	5	289839	70719.6	80873.1	514085	2863.9
G8	5	284850	68820.8	76486.4	494626	2878.26
G9	5	305029	76583.2	82305.9	555661	2843.62
G10	5	281688	63147.2	63799.3	454032	1342.18
G11	5	417356	92302	77783.7	545939	3343.43
G12	5	262117	20268.6	9690.35	7976.95	1253.59
H1	5	268641	68960.5	57308	500735	2548.36
H2	5	266275	66046.5	58679.3	470261	2139.63
H3	5	488532	113672	97948.3	695637	3933.96
H4	5	440895	37479	20564.3	16156.5	4592.13
H5	5	269834	22888.3	12373.5	10458.8	3169.09
H6	5	286981	23767.8	13115.9	10525.3	2985.23
H7	5	333044	80132.9	93011.1	638527	2990.26
H8	5	309466	76298.3	82106.5	568147	2898.03
H9	5	324351	83182.7	85668.9	610648	2672.34
H10	5	343918	27178.3	13932.7	11401.5	2873.47
H11	5	495626	39731.1	20348.3	15747.1	4347.7
H12	5	264133	66910.9	52128.1	449325	1183.31
A1	6	199774	56084.2	33386.1	324043	1279.29
A2	6	185620	47591.6	33462.2	288428	1211.42
A3	6	318655	70101.8	52692.5	418473	2205.96
A4	6	336234	59679.6	58337.9	443489	2643.81
A5	6	198094	45084.6	44995.1	347675	1189.19
A6	6	230002	50922.8	49103	366186	1566.13
A7	6	230219	53808.8	49144.2	359547	2298.05
A8	6	217986	52147.9	51698.6	392946	2156.95
A9	6	245625	60723.7	55494.2	428462	2231.55
A10	6	262798	68095.8	55568.7	441148	1989.73
A11	6	415174	103019	74002.8	604850	0
A12	6	231338	65706.7	47544.4	431123	1580.84
B1	6	186074	48085.5	35358.8	311113	1723.8
B2	6	201288	51211.7	40353.1	335223	1266.55
B3	6	320835	72143.2	61534.1	463551	2199.91
B4	6	271479	56469.4	56128.3	412162	9432.54
B5	6	174283	41004.9	44112.2	321910	2055.99
B6	6	198902	16465.8	9597.55	8230.59	2306.8
B7	6	203764	45417.7	49782.5	350570	2051.48
B8	6	218851	47696.1	53853.5	380416	1679.35
B9	6	219534	49084.9	53377.9	392142	1925.28
B10	6	302638	62151.8	63946.7	473508	2917.41
B11	6	441645	92345.3	82419.6	626457	3750.32
B12	6	232837	58213.8	49954.6	432713	1678.22
C1	6	227806	64539.9	43903.9	363622	1854.95
C2	6	226246	58704.2	47433.6	369284	1564.28
C3	6	337371	79545.7	67218.8	473813	2688.54
C4	6	254038	54603.9	56356.3	395138	2837.47
C5	6	203032	48244.1	59548.1	423297	1670.19
C6	6	214912	47716	55224.7	371265	2233.01
C7	6	226494	55901.1	59034.8	396710	2090.88
C8	6	232077	58206.1	60241.6	405996	1647
C9	6	235626	58740.5	60468.9	420043	1320.81
C10	6	268966	65342.5	67349.1	488157	2113.46
C11	6	378557	87198.4	81888.5	613219	3266.95
C12	6	231117	62775.6	56274.9	476954	1520.17
D1	6	256629	68349.7	51017.2	411092	2031.03
D2	6	226502	56597.5	49774.6	375656	1199.65
D3	6	366601	84961.3	75725.1	510293	3213.9
D4	6	322284	72329.2	68960.8	447715	3414.96
D5	6	248291	59029.3	62208.5	401417	2299.26
D6	6	252634	60500.5	61343.4	381750	2148.5
D7	6	248231	61375.5	62392.8	378239	3298.87
D8	6	240409	56477.8	63742.1	408003	1843.96
D9	6	246816	60647	63319	414320	2284.98
D10	6	277654	67549.5	69234.2	477649	2100.28
D11	6	396195	92501.6	83987.6	604572	2039.71
D12	6	269114	70622.8	60487.1	485960	1793.07
E1	6	292682	70926.2	55719.9	437962	2210.16
E2	6	271580	65138.3	55782.8	407474	1899.23
E3	6	416162	96787.3	86927	566022	3438.49
E4	6	411123	95239	91863.7	571514	3299.89
E5	6	264968	66592.6	69295.1	436394	1913.15
E6	6	286260	68786.9	76001.8	463921	2455.43
E7	6	259393	64053.6	72103	440994	2510.06
E8	6	284797	70177.7	78384	490554	2117.11
E9	6	273057	69204.8	71632.9	461957	2258.49
E10	6	298919	75251.5	77668.6	533115	2306.44
E11	6	426365	103520	97646	701386	2922.89
E12	6	279911	77595.2	67633	541059	2037.89
F1	6	258084	67799.2	56202.5	434630	2116.27
F2	6	243013	60110.7	55468.4	414277	1447.67
F3	6	436120	100231	92183.7	590798	3367.75
F4	6	436479	95549.7	88577.7	547518	3484.57
F5	6	310655	73789.2	74953.1	477641	2086.78
F6	6	277898	63723.3	70829.2	434700	2267.82
F7	6	295932	73704	87233	542394	3002.79
F8	6	296112	73169	84459.2	533291	3428.76
F9	6	300542	75746.8	84015.8	554418	2153.74
F10	6	322741	80972.8	84265.7	594234	2191.43
F11	6	455226	112068	102566	736797	1858.14
F12	6	289666	79906.3	70191.9	573542	2000
G1	6	290896	65570.2	54749.4	442588	2841.59
G2	6	284840	69777.6	60042.7	453184	2059.95
G3	6	528407	119746	103994	698387	3774.3
G4	6	487439	103141	98632.8	634259	3849.77
G5	6	317501	73918.5	76489.8	498879	2506.12
G6	6	322270	70493.6	76770.1	482793	2885
G7	6	290286	71046.1	80844.5	514490	2963.84
G8	6	286293	69562.5	76518.2	495377	3330.12
G9	6	306262	77215.4	82470.5	556008	2970.43
G10	6	282663	63304.4	63869.9	453446	1705.55
G11	6	418432	92772.5	78170.5	546991	3041.24
G12	6	261478	19988.3	9632.94	7941.99	1716.29
H1	6	269029	68838.4	57219.2	499378	2356.39
H2	6	266551	66825.4	58610.6	469401	2224.35
H3	6	489376	114189	98007.2	694457	4219.12
H4	6	440946	37618	20547.4	16321.6	4557.32
H5	6	268942	22703	12300.5	10576.1	2999.3
H6	6	286014	23832.3	13135.4	10317	2958.42
H7	6	334054	80437.3	93094.8	638145	2946.77
H8	6	309988	76605.8	82264	568290	2641.06
H9	6	325203	83820.1	85551	610678	3049.21
H10	6	343623	27108.7	13827.1	11265.9	3334.07
H11	6	495494	39791.1	20359	15695	4186.92
H12	6	265009	67473.8	51800.9	447182	1973.36
A1	7	199803	55967.6	33639	323319	1350.69
A2	7	186244	47652.4	33423.9	288526	1404.66
A3	7	319389	69938	52965.5	419016	2211.85
A4	7	336995	59890.1	58482	443691	2564.04
A5	7	198530	45270.3	44995.9	347992	1302.6
A6	7	230964	50832.7	49131.6	366838	1819.8
A7	7	231274	54008.2	49073.5	359117	1794.52
A8	7	218771	52722.4	51644.8	392553	2186.83
A9	7	246721	61452	55448.2	428032	2044.54
A10	7	263005	68501.6	55795	441094	2048.11
A11	7	416080	103449	74175.4	604603	0
A12	7	232397	65875.2	47680.7	430110	1782.59
B1	7	186762	47848.9	35371	311135	1662.52
B2	7	201992	51667.5	40489.5	335689	1503.68
B3	7	321421	72634.5	61527	464069	2061.62
B4	7	272851	56741.2	56343.2	412207	9341.13
B5	7	174790	41231.9	44066.6	322112	1836.07
B6	7	198522	16353	9484.65	8282.34	2262.41
B7	7	204837	45746.3	49855.1	350656	2114.95
B8	7	219396	48000.4	53861.3	380425	1910.85
B9	7	220632	49581.5	53441.2	392359	1526.92
B10	7	303770	62485.6	64042.3	474035	2714.47
B11	7	442501	92658.1	82515.7	626872	3844.74
B12	7	232886	58616.2	50062.3	432953	1765.55
C1	7	228539	64647.5	44005	363046	1653.35
C2	7	226301	59212.1	47414.7	369739	2093.65
C3	7	339097	79772.8	67491.9	474640	2850.55
C4	7	254489	54951	56549.7	395094	2530.77
C5	7	203962	48668.8	59637.5	423180	2081.03
C6	7	215201	47909.3	55196.6	371370	2074.83
C7	7	227290	56368.5	59251.3	396359	2198.38
C8	7	232484	58196.6	60349.3	406071	1730.3
C9	7	236965	58961.9	60511.3	419549	1496.03
C10	7	269768	66006	67468.7	488534	2307.33
C11	7	379365	87865.9	82023.4	614445	3253.67
C12	7	231761	62605.4	56435.3	476589	1479.53
D1	7	256972	68872.9	51097.2	411151	2162.9
D2	7	227612	57419	50039.6	376090	1078.88
D3	7	367637	85395.3	75760.2	510175	3053.16
D4	7	323316	72646.3	68973.4	448488	3462.33
D5	7	248927	59563.7	62436.5	401130	2221.58
D6	7	253780	61215.8	61428.1	382233	1850.07
D7	7	249363	61530.1	62498.7	378623	3392.19
D8	7	241378	56721.6	63979.8	408441	1985.29
D9	7	247467	60931.3	63626.6	415437	2305.22
D10	7	278753	68354.4	69295.3	478171	1953.09
D11	7	397192	92990.4	84134.5	605277	2111.94
D12	7	270333	71131.7	60621.9	485406	1883.02
E1	7	292651	71404.5	55582.9	437613	2904.51
E2	7	272029	65468.9	55824.1	407349	2060.92
E3	7	416764	97199.7	87123.9	566340	3357.92
E4	7	412606	96150.9	92041.5	571697	3326.82
E5	7	265744	67172.3	69382.2	436430	1887.72
E6	7	286557	69198.7	76249	464576	2389.01
E7	7	260380	64225.6	72430.4	441346	2404.66
E8	7	286254	70700.6	78812.7	490752	2239.19
E9	7	274624	69614.2	71770.5	462938	2020.71
E10	7	299678	75463	77690.8	533693	2333.36
E11	7	428119	103722	97900.2	701036	3217.15
E12	7	279795	78006.7	67614.8	542704	2168.65
F1	7	258532	68176.5	56152.6	433816	1600.18
F2	7	244005	60216.4	55454.3	414802	1403.2
F3	7	437431	100555	92379.5	591962	3246.77
F4	7	437057	95999.2	88797.6	547977	3583.28
F5	7	312014	74305	75195.7	477453	2014.97
F6	7	278346	63698	70704.1	434557	2346.96
F7	7	295895	74195.8	87329.3	542706	2747.46
F8	7	297310	73739.9	84729.2	534181	3543.12
F9	7	301601	76203	84075.8	554884	2384.54
F10	7	323168	81412.2	84525.2	594659	2170.11
F11	7	456621	112684	102585	738240	2732.57
F12	7	290118	80317.1	70114.6	572425	1950.15
G1	7	290827	65637.8	54651.8	441600	2054.43
G2	7	285892	69943.7	60237.3	453593	1987.56
G3	7	530259	121109	104492	699103	4135.44
G4	7	487654	103313	98741.2	633508	3966.25
G5	7	318392	74351.9	76487	498737	2367
G6	7	322416	70847.5	76798.4	482691	2983.14
G7	7	291482	71656.2	81148.1	515164	3297.31
G8	7	286799	69768.7	76781.7	495182	3200.88
G9	7	307163	77597.8	82743.2	557019	2959.27
G10	7	282652	63600.1	63997	454117	1678.27
G11	7	419404	93166.4	78381	547137	3296.29
G12	7	261509	19689.4	9642.08	7762.17	1632.38
H1	7	269027	69019.7	57092.9	498454	2218.78
H2	7	266912	67020.8	59044.9	469053	2201.45
H3	7	489710	114413	98346.1	693028	3848.42
H4	7	440138	37501.7	20384.4	16317.8	4516.88
H5	7	268089	22748.1	12507.4	10378.3	3099.41
H6	7	285401	23972.7	13091.9	10475.9	2886.02
H7	7	335037	81318	93033.3	638036	2863.65
H8	7	311085	77133.7	82523.4	568959	2885.97
H9	7	326177	84054.9	85881.5	610907	3072.77
H10	7	343313	27231.3	13787.4	11449.5	3399.51
H11	7	494424	40064	20305.4	15910.2	4366.31
H12	7	264562	66868.1	51866	447580	1865.31
A1	8	200537	56980.3	33645	322651	966.024
A2	8	186869	47753.3	33290.5	288534	1063.84
A3	8	320944	71096.9	52906.7	419032	2130.43
A4	8	337962	60300.5	58650.9	443370	2633.41
A5	8	198818	45510.4	45044.9	347161	1332.57
A6	8	231773	51305.8	49217.7	366443	1538.84
A7	8	232315	54322.2	49170.7	359592	2005.26
A8	8	218940	52817.2	51734.2	392660	2085.55
A9	8	247146	61528.1	55621.4	428360	1853.68
A10	8	264235	68728.2	55859.8	441760	2247.38
A11	8	417721	104127	74146.8	604788	0
A12	8	232037	65510.5	47839.7	430054	1582.22
B1	8	187071	47682.9	35236.5	310838	1702.49
B2	8	202418	51962	40770.4	335859	1338.57
B3	8	321844	73197.4	61678.5	464194	2373.51
B4	8	272976	57162.6	56427.7	412350	9764.55
B5	8	175314	41543.1	44241.4	322330	1902.63
B6	8	198355	16409.4	9370.96	8116.59	2322.14
B7	8	205604	46144	50075	351030	2231.17
B8	8	220250	48293.2	53968.8	381008	1911.65
B9	8	221026	50016.3	53468.4	392141	1728.97
B10	8	304077	62752	64072.7	473590	2622.88
B11	8	443209	93017.9	82588.3	625616	4052.07
B12	8	234005	59411.5	50154.2	433177	1817.05
C1	8	229179	65116.7	43812.5	363626	2070.07
C2	8	226791	59422.4	47540.6	369154	2039.79
C3	8	339882	80567.6	67456.2	474494	2719.44
C4	8	255421	55238.8	56645.9	395445	2672.4
C5	8	204480	48692.2	59650.9	423194	2037.17
C6	8	216252	48226.8	55439	371251	2086.07
C7	8	227942	56713.1	59237	396113	2001.44
C8	8	233209	58342.4	60636.2	406266	1648.65
C9	8	237498	59405.7	60714.8	419988	1351.39
C10	8	270430	66133.9	67699.3	488563	2325.58
C11	8	380348	88020.5	82225.7	614608	3339.45
C12	8	232061	63183	56345.7	476796	1606.94
D1	8	258321	69240.6	51136.6	410606	2201.1
D2	8	228702	57772.1	50050.8	376007	1337.53
D3	8	369349	85767.1	75984.8	510467	2875.12
D4	8	323753	73178.7	69120.5	448052	2993.52
D5	8	249410	59526.9	62612.3	401690	2336.59
D6	8	254885	61597.2	61606.8	382970	2614.85
D7	8	250010	61582	62402.5	379007	3157.4
D8	8	241628	56979.2	64001.5	408886	2196.86
D9	8	248585	61185.9	63799.2	415470	2440.13
D10	8	279273	68483.2	69528.1	478396	2106.45
D11	8	398510	93659.9	84337.4	605801	2377.74
D12	8	270301	71670.8	60864.1	485872	2241.83
E1	8	292864	71542.6	55733.2	437865	2450.73
E2	8	272950	65955.9	55881	407528	1899.23
E3	8	417777	98071	87390.4	567068	3053.05
E4	8	413154	96510.5	92154.2	571489	3421.07
E5	8	266506	67661.4	69266	436517	1720.92
E6	8	287340	69630.9	76522.4	464112	2572.63
E7	8	260991	64528.8	72416.6	441738	2503.22
E8	8	286440	71032.1	78769.3	491020	2504.72
E9	8	275623	70247.5	72057.7	463074	2004.18
E10	8	300709	75988.6	78051.9	533442	2220.29
E11	8	428892	104543	97940.2	700757	3206.39
E12	8	281154	78426.1	67847.6	541468	2184.09
F1	8	259581	68467.9	56344.6	433694	1663.95
F2	8	244801	60808	55624	414183	1657.16
F3	8	438890	101355	92322	592006	3185.23
F4	8	437687	96674.4	88785.5	548064	3967.82
F5	8	312921	74439.8	75323.8	477471	1998.89
F6	8	278249	63990.1	71043.4	434566	2382.14
F7	8	297190	74661.1	87213.2	542338	2729.29
F8	8	298385	74388.1	85044.2	534233	3355.89
F9	8	301879	76595.5	84381	554403	2324.15
F10	8	324132	81888.8	84487.9	595207	2116.82
F11	8	458058	113453	102866	736361	2263.69
F12	8	290749	80804.4	70263	572076	2127.2
G1	8	291897	66131.8	54561.9	440653	2635.4
G2	8	287063	70393.2	60091.3	453362	1867.33
G3	8	531372	121351	104498	699816	3952.34
G4	8	488701	103709	98980.6	635536	3850.76
G5	8	319349	74915.9	76537.5	499019	2374.67
G6	8	323076	71161.4	77046.6	483114	2907.22
G7	8	292089	72098.8	81126.9	515261	2477.19
G8	8	287373	70294.6	76791.4	496077	3030.82
G9	8	308544	78281.6	82854.3	556799	2805.06
G10	8	283493	63773.6	64133.8	454353	1201.41
G11	8	420566	93434.2	78486.3	547301	3385.74
G12	8	260667	19773.8	9660.34	7898.28	1928.51
H1	8	268327	69153.3	57325.1	497103	2417.55
H2	8	267231	66997.3	58701.4	468101	2783.01
H3	8	491065	114711	98538.4	694457	4416.35
H4	8	439739	37233.1	20430.3	16471.6	4541.33
H5	8	267401	22695	12532.4	10527.4	3111.19
H6	8	285069	23921.5	13073.3	10530.7	2845.8
H7	8	335442	81577.2	93180.4	636847	3051.15
H8	8	311856	77457	82531.8	570066	2657.76
H9	8	326938	84653.6	85928.3	610812	2934.65
H10	8	343397	27010.6	13695.5	11327.5	2996.96
H11	8	495485	39808.3	20393.8	15999.8	4582.89
H12	8	265371	67416.7	51906.9	446459	1656.28
A1	9	200805	56423.9	33749.7	321979	1162.73
A2	9	186602	48139.6	33598.8	288820	1104.19
A3	9	320918	71223.4	53015.3	419403	1921.51
A4	9	337912	60565.2	58658	443445	2651.62
A5	9	199623	45769.2	45147.8	347687	1373.08
A6	9	232327	51537.3	49333.2	366919	1533.22
A7	9	232340	54664.8	49299.4	359222	1978.72
A8	9	219374	52986.2	51909.8	392277	2156.95
A9	9	247456	61962.2	55790.8	428114	2153.47
A10	9	264597	69212.9	55966.5	441128	1891.1
A11	9	418171	104354	74330.9	605508	48.7598
A12	9	231474	66145.6	47638.1	428933	1394.29
B1	9	186842	48133.9	35376.5	310282	2011.55
B2	9	203705	52265.8	40830.1	335696	1567.95
B3	9	322562	73249.8	61815.8	464524	1921.36
B4	9	273219	57483.7	56593.4	412702	9550.68
B5	9	175827	41485.3	44159.5	322102	1824.27
B6	9	198236	16669.8	9482.25	8351.06	2198.64
B7	9	206407	46571.5	50121.3	350955	2312.98
B8	9	220567	48484.4	54062.2	380795	2043.7
B9	9	222102	50202.7	53633.6	391968	1738.01
B10	9	304530	63254.3	64397.8	474282	2791.7
B11	9	443156	93293.2	82749.8	627278	4192.68
B12	9	234323	59286.4	50241.6	432655	1838.32
C1	9	229685	64975.4	44216.9	363344	1779.97
C2	9	227617	59793	47643.5	369732	1572.57
C3	9	340330	80655.1	67731.2	474768	2602.39
C4	9	256589	55325.6	56663.4	395935	2603.05
C5	9	204954	49081.4	59904.9	423446	2087.3
C6	9	216524	48531.9	55548.2	371033	2281.99
C7	9	228651	56966.5	59381.8	396673	2282.08
C8	9	233387	58522	60453.6	406119	1684.94
C9	9	238046	59552.5	60701.8	420148	1567.11
C10	9	271502	66700.7	67838.7	489384	2303.85
C11	9	381688	88501.2	82308.2	614912	2993.25
C12	9	232011	63485.2	56584.7	476711	1948.54
D1	9	258647	69847.7	51349.1	410498	1801.8
D2	9	228894	57879.1	50125.9	376072	1102.03
D3	9	369392	86425.6	76021.9	511061	2853.75
D4	9	324657	73316.8	69125.3	448378	3234.34
D5	9	249665	60120.2	62501.3	402579	2575.7
D6	9	255805	61874.6	61789.4	382676	2121.63
D7	9	249775	61882.8	62671.6	379260	3402.02
D8	9	242205	57065.8	63990.7	409177	2037.13
D9	9	248992	61532.9	63919.9	416095	2236.08
D10	9	280792	68833.6	69614.8	479079	2358.51
D11	9	399419	94098.7	84333.5	606231	2224.62
D12	9	271118	71911.3	60911.8	485975	2180.54
E1	9	293178	72067.3	55851.5	438210	2349.58
E2	9	273442	66486.5	55876.5	408346	1881.02
E3	9	418270	98704.9	87328.3	567219	3073.74
E4	9	414686	97144.2	92438	571396	3527.66
E5	9	266665	67842.5	69480.2	435973	1924.33
E6	9	288219	69928.5	76659.7	463737	2512.07
E7	9	261514	65004	72583.8	440875	2299.26
E8	9	287190	71400	78724.9	491407	2222.91
E9	9	276635	70614.2	72047.7	462911	2218.09
E10	9	301579	76537.2	78040.3	533834	2460.8
E11	9	430422	104781	98100.6	701267	3140.89
E12	9	281265	78591.2	67932.2	541439	2068.75
F1	9	259644	68639.9	56331	432995	1935.34
F2	9	244786	60998.8	55629.9	414648	1067.32
F3	9	439803	101874	92532.7	592188	3057.99
F4	9	438379	96990.8	88950.6	548593	3689.18
F5	9	312486	74822.8	75314.4	477527	2126.43
F6	9	278458	64050	70893.9	434178	2268.7
F7	9	298223	74926.2	87533.2	542666	2760.84
F8	9	299355	74592.4	85116.2	534474	3550.2
F9	9	303340	77069.7	84539.5	555080	2615.34
F10	9	325311	82057.9	84829.3	595086	1958
F11	9	459257	113700	103053	737621	2047.13
F12	9	290959	80997.4	70325.2	572514	2137.51
G1	9	291020	66128.5	54746.3	440452	2229.02
G2	9	287496	71059.8	60369.6	453634	2040.32
G3	9	532668	121896	104541	700317	4193.53
G4	9	489087	104010	99037.7	634686	3849.77
G5	9	320254	75407.6	76695.8	499394	2556.97
G6	9	323757	71387.3	77058.5	482439	2900.74
G7	9	293333	72340.8	81532.9	515627	2900.32
G8	9	288327	70621.9	77075.2	496196	3177.55
G9	9	309148	78736.8	83198.7	557330	2668.11
G10	9	283725	63856.5	64146.9	454438	1405.47
G11	9	421823	94214.5	78464.2	547876	3220.14
G12	9	260757	20177.1	9608.16	7923.25	1902.6
H1	9	268621	69378.5	57147.5	496632	2507.59
H2	9	267559	67452.2	59011.1	468319	2254.11
H3	9	491726	115174	98370.1	694674	4173.97
H4	9	439397	37453.4	20419.1	16337.8	4273.25
H5	9	266923	22525.8	12562.4	10433	3250.55
H6	9	284939	23926.8	13216.1	10665.3	2808.26
H7	9	336057	81907.7	93462.1	637908	2772.8
H8	9	312770	78013.7	82760.6	570154	2936.99
H9	9	327705	85060.7	86013.3	611153	2778.34
H10	9	342937	27165.4	13974.9	11352.2	3243.92
H11	9	495107	40098.2	20373.7	15974.4	4562.96
H12	9	264950	67327	51817.7	445537	1891.88
A1	10	200637	57062.4	33698.8	321732	1000.99
A2	10	187529	48326.5	33522.3	288383	1243.27
A3	10	321327	71574.8	53036.6	419348	1903.85
A4	10	338138	60759.7	58692.4	443404	2756.54
A5	10	199494	46105	45252.3	348007	1231.31
A6	10	232620	51754.1	49415.2	366924	1659.25
A7	10	232994	54929.9	49356.5	359686	2090.53
A8	10	220007	53350.5	51903.2	392564	2312.2
A9	10	248280	62193.6	55669.2	427853	2267.22
A10	10	265764	69587.3	56041.2	442265	2070.25
A11	10	418845	104830	74596.1	604930	0
A12	10	232314	66414.5	47457.8	428435	1985.72
B1	10	187148	48063.4	35478.4	310112	1698.49
B2	10	203612	52787	40921.8	335736	1229.98
B3	10	323620	73882.3	61924.5	464388	2336.24
B4	10	273552	57725.8	56495.9	412849	9567.93
B5	10	176177	41938.4	44233.8	322721	1791.41
B6	10	198526	16505.2	9532.69	8424.63	2304.38
B7	10	206651	46829.6	50205.1	351363	1962.79
B8	10	221074	48988.2	54221.5	381005	2112.91
B9	10	222261	50676.5	53881.1	392299	1888.32
B10	10	304803	63453.5	64250.4	474039	2848.27
B11	10	444310	93810.5	82913.3	626913	3989.46
B12	10	234689	59588.5	50197.9	432672	1778.98
C1	10	230020	65199.7	43925.8	362885	1709.9
C2	10	228688	60115.6	47608.9	369371	1984.88
C3	10	340868	81240.6	67622.3	475068	2908.61
C4	10	256323	55736.9	56687.7	395832	2678.26
C5	10	205563	49515.6	59941.5	423320	1848.31
C6	10	216946	48692.6	55468.7	371067	2233.01
C7	10	228871	57400.6	59478.9	396286	2145.04
C8	10	234164	58801.8	60747.1	406316	1507.62
C9	10	238370	60046.2	60627.7	420028	1526.61
C10	10	272096	66920.2	68061.6	489722	2291.68
C11	10	382308	88806.4	82541.8	615818	3262.86
C12	10	232782	64110.3	56433.1	476547	1554.22
D1	10	259253	70040.2	51252.4	410347	1858.49
D2	10	229479	58346.5	50138.1	375752	1061.77
D3	10	371073	86971.3	76316.6	510773	2965.66
D4	10	325095	73814.7	69211.5	448470	3277.77
D5	10	250017	60429.3	62590.7	402254	2547.45
D6	10	256676	62144.7	61695.3	382697	2094.76
D7	10	249928	61599.5	62814.4	379056	3332.27
D8	10	242526	57169.5	64064.1	409030	2034.63
D9	10	249841	61851.8	64015.5	416214	2490.72
D10	10	281148	69326	69648.4	478863	2224.55
D11	10	400392	94620.9	84518.1	605805	2203.43
D12	10	272241	72249.6	60976.6	485830	1945.29
E1	10	293705	72117.9	55910	437366	2323.61
E2	10	273994	66666.3	56317.4	407997	1850.27
E3	10	419869	99061.4	87577.7	567801	3519.07
E4	10	414920	97536.7	92525.3	571751	3460.34
E5	10	267129	68246.8	69475.2	436054	1925.35
E6	10	289000	70405.7	76744.3	463725	1931.91
E7	10	262735	65311	72685	441256	2234.85
E8	10	288061	71860	79011.4	491093	2138.47
E9	10	277134	71132.9	72240	463183	2340.2
E10	10	302472	76701.8	78086.5	533903	2209.52
E11	10	431061	105557	98303.7	702661	3184.85
E12	10	281711	79023.9	67992.6	541403	2283.99
F1	10	259745	68811.8	56350.7	433331	1837.46
F2	10	245431	61636.5	55868.1	414893	1103.6
F3	10	440171	102014	92795.5	592110	3323.95
F4	10	439648	97066.7	89247.6	549001	3575.05
F5	10	313518	75174.4	75301.8	477715	2027.83
F6	10	279562	64326.9	70890.4	433677	2734.75
F7	10	298797	75483.9	87786.1	543014	2573.41
F8	10	300559	75143.8	85134.2	534587	3578.54
F9	10	304229	77565.2	84703.3	555429	2354.34
F10	10	325770	82704.8	84786.7	595912	2333.19
F11	10	459893	114468	103078	737406	1859.17
F12	10	291472	81194.2	70348.3	572324	2147.83
G1	10	291743	66675.2	54495.3	440055	2147.75
G2	10	288521	71164.6	60494.3	453685	1817.02
G3	10	534912	122680	104716	700955	3797.03
G4	10	489980	104385	99114.6	635558	4144.92
G5	10	320638	75575.9	76834.9	498495	2281.6
G6	10	323927	71778.6	77034.8	482795	2953.51
G7	10	294068	72862.7	81652.8	515716	2794.77
G8	10	288971	71034.3	77102.2	496941	3455.47
G9	10	310400	78866.3	83310.8	557781	2935.93
G10	10	283769	63822.7	64341.3	454619	1436.02
G11	10	422703	94584.3	78797.1	547544	3478.81
G12	10	260256	19769.5	9771.23	7807.12	1816.23
H1	10	268104	69493	57261.9	495550	2346.19
H2	10	268030	67495.5	59034.4	467360	2860.85
H3	10	492901	115668	98664.6	693976	4173.97
H4	10	438940	37445.9	20447.2	16239.1	4734.16
H5	10	266953	22800.2	12369.5	10351.5	2960.04
H6	10	284512	23978.9	13157.6	10542.4	2616.1
H7	10	336662	81904.8	93390	637724	2928.4
H8	10	313518	78447.6	82730	569402	2905.45
H9	10	327721	85270.7	86213.1	610642	2898.25
H10	10	342345	27210.6	13912.8	11442.1	3101.92
H11	10	494000	40052.5	20325.5	16440.9	4290.57
H12	10	264332	67877.6	51618.7	444747	1858.22
A1	11	200838	57172.3	33725.8	321858	741.638
A2	11	187635	48556.9	33428.3	288406	1497.03
A3	11	322244	71894.1	53209.1	419555	2360.94
A4	11	338546	60861	58803	443979	2837.18
A5	11	200211	46282.6	45281.7	348052	1158.41
A6	11	233196	51745.5	49442.3	367157	1624.73
A7	11	233637	55484.4	49342.8	359689	2322.99
A8	11	220097	53497.2	51948.8	392567	2051.51
A9	11	248264	62561	55878.8	428139	1997.31
A10	11	265769	69939.4	56142.9	441889	2002.82
A11	11	419910	105703	74748.1	605478	0
A12	11	232635	66399.1	47340	428125	1833.71
B1	11	186826	48119.2	35498.8	310543	2368.56
B2	11	203905	52847.8	40842.7	336158	1358.52
B3	11	324367	73975.1	62046.6	464684	2188.14
B4	11	273761	57832.8	56767.8	413169	9344.58
B5	11	176351	41997.9	44386.6	322566	1782.98
B6	11	198236	16271.1	9480.65	8198.25	2484.37
B7	11	207081	47036.1	50336	351068	2071.36
B8	11	221697	49037.5	54253.7	381026	1977.68
B9	11	222894	50727.8	53684.6	392446	1495.7
B10	11	305374	63249	64485.4	474049	2950.63
B11	11	444440	94088.9	82999.2	627092	3837.56
B12	11	234820	59679.3	50074.6	432618	1720.76
C1	11	230575	65981.3	44020.8	362844	1676.71
C2	11	228768	60336.8	47745.3	369317	1800.48
C3	11	341702	81408.1	67671.1	474998	2717.57
C4	11	257213	56137.8	56845.1	396139	2886.31
C5	11	205887	49454.2	59994.3	422991	1936.03
C6	11	217483	48820.7	55520.1	371566	2203.3
C7	11	229706	57522.8	59557.7	396363	2161.45
C8	11	234304	58808.9	60710.4	406065	1743.5
C9	11	238958	60211.4	60802.7	419409	1330.72
C10	11	273197	67136.2	67932.5	489749	2306.46
C11	11	382916	88966	82588.1	616124	3441.58
C12	11	233626	64068.6	56719.7	476519	1686.03
D1	11	259431	70060	51437.4	409921	2231.91
D2	11	230530	58580.2	50428.5	376200	1041.64
D3	11	371725	87142.3	76299.6	511502	3041.97
D4	11	325000	73776.5	69571.5	448843	3571.89
D5	11	250826	60635.3	62837.3	402404	2494.99
D6	11	257088	62520.7	62016.7	382872	2239.66
D7	11	250038	61545.8	62829	379220	3271.36
D8	11	242259	57131.4	64281	408914	1676.71
D9	11	250205	62279.5	64218.3	416004	2263.9
D10	11	281908	69225.4	69672.3	479290	2007.73
D11	11	401595	94982.1	84512.3	608316	2455.74
D12	11	273174	72549.1	60985.7	486117	2316.95
E1	11	293573	72363.9	56053.7	437677	2780.13
E2	11	273974	66755.6	56475.9	408372	1959.58
E3	11	420253	99057.2	87721.1	567749	3508.18
E4	11	416055	97440.4	92858.8	571848	3315.6
E5	11	267865	68302.1	69615.4	435587	1825.68
E6	11	289297	70302.5	76821.2	463892	2332.36
E7	11	262530	65282.7	72555.2	441663	2557.88
E8	11	289014	72062.1	79074.9	491534	2292.09
E9	11	277700	71600.6	72307.5	462848	2068.45
E10	11	303018	76976.9	78326.9	533165	2143.11
E11	11	432114	106071	98318.3	702294	3195.62
E12	11	281651	79153.7	67972.8	541283	2321.35
F1	11	260844	69467.8	56358.2	432932	1920.51
F2	11	246162	61487.1	55921.1	414148	1442.99
F3	11	440869	102109	92780.6	591733	3308.3
F4	11	440035	97147.5	89332.7	547988	3885.57
F5	11	313926	75545.3	75287.1	477123	1981.74
F6	11	279173	64454.4	71136.1	433983	2062.06
F7	11	298980	75964.7	87790.9	542811	2705.38
F8	11	300968	75560.3	85352.2	534699	3630.15
F9	11	304771	78276	84664.8	555260	2130.02
F10	11	325910	82568.6	84901.6	595234	1913.24
F11	11	460978	114875	103341	737643	2185.03
F12	11	291843	81416.9	70501.1	570691	2139.23
G1	11	292341	66535.3	54628.5	439365	2403.61
G2	11	288790	71464.7	60478.1	453782	1960.57
G3	11	535027	122932	105052	700651	3890.47
G4	11	489966	104374	99348	637124	4099.51
G5	11	321412	75978.2	76888.3	499101	2516.67
G6	11	324336	71949.3	77281.2	482588	2956.29
G7	11	294459	72769.1	81602.1	515707	2748.07
G8	11	289323	71201.8	77148.5	496814	2892.84
G9	11	310632	79164.7	83340.1	557709	2909.56
G10	11	284150	63834.7	64390.1	454882	1581.15
G11	11	423377	94659.5	78963.6	548655	3446.17
G12	11	259656	19893.9	9777.75	7998.18	2016.11
H1	11	268118	69514	57319.9	494685	2137.23
H2	11	268755	67768.7	59005.3	467215	2328.52
H3	11	492547	115900	98573.2	694604	4083.67
H4	11	438827	37363.6	20533.4	16152.7	4700.3
H5	11	266294	22431.6	12463.4	10679.4	3071.93
H6	11	284015	23804	13155.8	10545.1	2993.27
H7	11	337012	82210.2	93332.3	637307	2952.57
H8	11	314055	78978.2	82970	571332	2762.59
H9	11	329112	85605.6	86334.3	610168	3025.66
H10	11	342252	27293.2	14035.7	11667.7	3132.79
H11	11	493915	39954	20478.3	16117.4	4499.18
H12	11	265386	67944.9	51778.6	443864	1702.33
A1	12	201529	57654.9	33580.6	320911	817.405
A2	12	187761	48404.4	33445.8	288342	1197.62
A3	12	323115	71724.1	53214.2	419365	2335.43
A4	12	338645	61362	58887	443498	2622.13
A5	12	200863	46289.1	45428.7	348121	1343.91
A6	12	233374	52074.2	49478.9	366678	1627.94
A7	12	233852	55345.2	49515.6	359731	2263.46
A8	12	220558	53731.3	51936.3	392734	2031.58
A9	12	248742	62748.6	55920.9	427840	2136.12
A10	12	266778	70188.4	56186.8	441978	2149.76
A11	12	420702	105969	74764.1	605629	0
A12	12	233156	66640.1	47513.2	427333	1381.85
B1	12	187546	47931.2	35467.5	310184	1858.35
B2	12	204870	52931.9	40952.8	335687	1300.9
B3	12	324870	74240.4	62079.1	464345	2275.43
B4	12	274512	57938.1	56709.1	413093	9614.5
B5	12	176885	42068.9	44429.7	322374	1916.12
B6	12	198060	16368.5	9590.34	8311.44	2490.83
B7	12	207978	47253.5	50275.4	351100	2056.07
B8	12	221998	49263.6	54280.4	380515	1972.9
B9	12	223470	50993.2	53886	392336	1624.66
B10	12	305615	63640.1	64522	474258	2699.21
B11	12	444645	94186.9	83122.9	628942	3879.64
B12	12	235169	60150.2	50135.1	431779	1850.63
C1	12	230810	66011.1	44162.1	363000	1953.29
C2	12	228979	60444.7	47745.3	369268	1470.01
C3	12	342792	81754.3	67941.4	474748	2771.89
C4	12	257370	56107.7	56917.1	396670	2594.26
C5	12	206815	49681.7	59985.3	423304	1869.79
C6	12	218068	48855.6	55647.7	371179	2385.57
C7	12	229862	57783.1	59573.6	396027	2255
C8	12	234477	59010.6	60910.9	406158	1936.49
C9	12	239334	60423.3	60850.8	419203	1395.19
C10	12	273681	67390.4	68216.4	489834	2279.51
C11	12	383810	89502.9	82856.8	615956	3694.85
C12	12	233763	63947	56833.6	477210	1296.1
D1	12	260076	70538.8	51359.8	409996	2250.4
D2	12	231114	58774.7	50448.8	375933	1179.52
D3	12	372641	87270.9	76519.2	511010	2945.32
D4	12	326310	73943.7	69437.9	448539	3335.01
D5	12	251237	60407.2	62875.6	401897	2343.65
D6	12	257740	62859.1	62002.4	382878	2228.14
D7	12	250106	61636.6	62642.5	379087	3275.29
D8	12	242738	57208.4	64427.8	409693	1610.64
D9	12	251001	62380.8	64240.1	416250	2245.35
D10	12	282190	69551.9	69882.1	478953	2051.8
D11	12	401990	95469	84681.4	607375	2322.85
D12	12	273432	72794	60994.9	485746	2177.58
E1	12	294293	72123.4	56011.1	437807	2375.55
E2	12	274594	67090.7	56264.9	408057	1968.69
E3	12	421214	99517.1	87845.2	567932	3431.96
E4	12	416799	98434.8	92547.4	571314	3620.79
E5	12	268653	68397.4	69605.4	435577	2091.14
E6	12	289484	70600.1	76725.8	463588	2725.97
E7	12	263215	65659.6	72763.7	441414	2358.79
E8	12	289163	72487.8	79280.7	491366	2517.94
E9	12	278747	71679.7	72336.6	462870	2297.05
E10	12	303624	77534.4	78427.1	533458	2269.65
E11	12	433081	106588	98452.2	701801	3184.85
E12	12	282515	79480.4	67957.8	539917	1978.59
F1	12	261108	69402.6	56566.9	432304	2016.91
F2	12	246899	61788.4	55826.8	414590	1343.52
F3	12	441721	102369	92789.1	592028	3718.19
F4	12	440235	97707.4	89217.2	548502	3738.54
F5	12	314283	75737.8	75420.4	477136	1536.95
F6	12	279306	64278.8	71044.3	433883	2214.18
F7	12	300115	76091.8	87823.9	542459	2925.33
F8	12	301690	76128.3	85521.2	534812	3437.87
F9	12	305631	78505.1	84650.9	555188	2000.6
F10	12	326496	82792	85115.3	595817	1998.51
F11	12	462164	115419	103415	736165	2433.26
F12	12	292968	81798.1	70366.9	571622	2113.45
G1	12	292478	66668.6	54664.2	439105	2435.22
G2	12	289329	71791.6	60503.1	453902	2241.53
G3	12	536637	123476	105238	701152	3610.15
G4	12	489745	104471	99490.9	635719	3791.53
G5	12	321595	76042.1	76877.9	499112	2536.82
G6	12	324660	72054.2	77253.8	482700	2745.19
G7	12	294713	73675.1	81689.7	515864	2461.31
G8	12	289862	71380.6	77323.2	497097	3370.93
G9	12	311168	79417.6	83527.9	557512	2796.95
G10	12	283935	64048.6	64344.5	454620	1711
G11	12	424079	94915.8	79059	547966	3199.59
G12	12	259903	19932.5	9595.11	8054.37	1797.72
H1	12	267982	69483.5	57094.6	493960	2052.28
H2	12	269364	67914.6	59330.1	467323	2296.47
H3	12	494065	116011	98711.4	694808	4283.28
H4	12	438765	37244.5	20757.2	16583.5	4670.2
H5	12	266571	22437.6	12461.4	10270	3055.24
H6	12	283755	23946.2	13141.6	10288.3	2818.09
H7	12	337324	82560	93656.3	637452	2946.77
H8	12	314610	79053.5	82897.7	570247	2797.84
H9	12	329622	86229	86324.7	610588	3099.53
H10	12	342408	26989.9	14024.5	11847.7	3266.15
H11	12	494460	40004	20312.1	16141.5	4346.37
H12	12	265505	67604.4	51670.8	443279	1330.34
A1	13	202329	57740.2	33766.2	320168	1232.66
A2	13	188126	48914.6	33613	288636	962.98
A3	13	323526	72067.2	53338	419313	2332.49
A4	13	338811	61428.6	58949.8	443763	2636.88
A5	13	200742	46496.8	45409.1	347869	1283.97
A6	13	233670	52323.5	49555.4	366678	1676.91
A7	13	234187	55556.4	49425.6	359661	2145.22
A8	13	221169	53756	52101.2	392574	2030.75
A9	13	248971	63271.2	56040.5	428146	2331.8
A10	13	266836	70030.5	56158.9	442146	2013.89
A11	13	421795	106778	74769.8	605572	0
A12	13	233208	66980.1	47579.9	426803	1489.63
B1	13	186891	47552.1	35498.8	310065	1795.74
B2	13	205244	53232.3	41041	336168	1441.63
B3	13	325227	74368.5	62020.1	465034	2294.06
B4	13	274755	58045.2	56684	412747	9526.54
B5	13	176810	42341.3	44346.1	322656	1861.35
B6	13	198215	16385.5	9542.3	8346.21	2302.76
B7	13	208063	47347.2	50452.7	351246	2266.34
B8	13	222685	49573.1	54311.8	381026	2031.77
B9	13	223563	51053.5	53965.8	391816	1554.84
B10	13	306080	63789	64526.5	474902	2903.04
B11	13	446068	94346.5	83038	627872	3467.04
B12	13	236049	60386.1	50162	432551	1750.99
C1	13	230832	66183.5	44326.5	362846	1882
C2	13	229359	60523.2	47675	369181	1655.45
C3	13	343184	82165.7	67886	474749	2820.58
C4	13	257566	55991.6	56898.6	396187	2645.05
C5	13	206740	49917	60134.6	423067	2079.24
C6	13	218183	49199.5	55751.2	371685	2472.29
C7	13	230462	57709.5	59653.2	395899	2484.77
C8	13	234770	59024	60932.1	405710	1710.51
C9	13	240200	60530.5	60775.1	419835	1537.36
C10	13	273702	67386.2	68275.8	490397	2258.64
C11	13	384688	89766.9	82826.6	616312	2955.47
C12	13	234101	64375.3	56783.8	476502	1913.4
D1	13	260179	70585.6	51303.7	410389	2196.17
D2	13	230979	58773.7	50413.2	375842	1213.74
D3	13	372622	87667.3	76572.3	511274	2948.37
D4	13	326348	74142.6	69637.3	449155	3260.99
D5	13	251804	60790.8	62903.2	401919	2200.39
D6	13	258280	63061	62028.1	383053	1713.81
D7	13	250492	61581	62752.2	379205	3606.35
D8	13	242764	57378.5	64277.7	409329	1758.66
D9	13	251128	62717	64119.4	416536	2404.71
D10	13	282739	69883.7	70086.6	479645	2249.23
D11	13	402881	95760.6	84982.8	606072	2171.65
D12	13	273616	73054.9	61110.4	486416	2041.17
E1	13	293717	72560.7	56102.9	437172	2442.53
E2	13	275215	67223.6	56286.1	408672	1961.86
E3	13	421459	99894.7	87913.7	567589	3401.47
E4	13	417582	98325.8	92866.5	571515	3284.18
E5	13	269079	68795	69720.5	435140	2160.3
E6	13	290416	70543.9	76701.5	463111	2374.36
E7	13	263814	65938.3	72823.6	441363	2638.88
E8	13	289785	72698.7	79422.9	492070	2458.93
E9	13	278620	71960.9	72470.7	463521	2038.15
E10	13	304043	77670.6	78482.2	533678	2063.23
E11	13	434317	106962	98658.1	701323	3507.83
E12	13	283339	79844.2	68017.5	540381	2146.72
F1	13	261543	69463.1	56325	432485	1787.04
F2	13	247070	62087.2	55918.8	413892	881.243
F3	13	441978	102787	92878.5	591922	3481.43
F4	13	440264	97822.7	89218.2	548325	3387.92
F5	13	314371	76024.6	75644.1	476403	1921.72
F6	13	279195	64293.1	71165.8	433048	2287.17
F7	13	300743	76539.7	87975.9	542294	2903.33
F8	13	302685	76250.5	85630.2	535025	3413.58
F9	13	306389	78921	84875.8	555565	2375.91
F10	13	327093	83087.8	85204.6	596501	1799.19
F11	13	462716	115479	103588	739777	2200.35
F12	13	292649	81972.9	70627.2	571486	1885.69
G1	13	291686	67022.7	54611.5	438829	2370.5
G2	13	290018	71944.9	60571.7	454203	2089.39
G3	13	536347	123735	105312	700721	4217.52
G4	13	489972	104480	99534.2	637485	4223.89
G5	13	321814	76260.2	77057.1	498833	2441.83
G6	13	325259	72450.8	77261.1	482723	2913.7
G7	13	295091	73677.8	81827.2	516308	3061.92
G8	13	289852	71778.8	77473.8	497269	3498.22
G9	13	311768	79937.5	83542.1	557729	2833.47
G10	13	284166	64069.3	64462.9	454654	1534.23
G11	13	423677	95193.7	79246.3	548745	3073.88
G12	13	259339	19806.7	9739.92	8116.81	1705.18
H1	13	268124	69393.8	56925.6	493184	2499.1
H2	13	269783	68257.1	59167.1	467755	2677.69
H3	13	494738	116217	98824.4	693991	3966.04
H4	13	437957	37476.1	20515.6	16288.4	4800.94
H5	13	265953	22696	12449.4	10357.5	3084.69
H6	13	283733	23978	13187.7	10453.5	2952.16
H7	13	338698	82689.1	93760.1	638378	3031.82
H8	13	315089	79575.7	83097.8	570798	3074.28
H9	13	329566	86263.5	86333.2	611447	3257.99
H10	13	342286	27279	14131.3	11791	3072.28
H11	13	494333	40051.1	20430	16347.4	4101.88
H12	13	265181	68102	51812.1	442697	1847.59
A1	14	201410	57732	33600.1	320277	963.11
A2	14	188563	48817.1	33585.7	288151	1130.73
A3	14	323144	72254.8	53535.9	419692	2278.54
A4	14	339599	61516.5	58956	443553	2923.89
A5	14	201182	46723.1	45471.2	348273	1116.28
A6	14	233710	52220.2	49600	367160	1657.65
A7	14	234484	55826.2	49539	359155	1939.31
A8	14	220766	54113.7	52198.1	392741	2087.21
A9	14	249467	63213.2	55744.8	427309	1976.1
A10	14	267277	70324	56265.6	441853	2216.18
A11	14	422510	107306	75017.9	604868	0
A12	14	233981	67691	47521.7	426949	1308.61
B1	14	187140	48025.2	35655	309732	1587.92
B2	14	205448	53351.5	40901.2	336215	1515.87
B3	14	325956	74905.2	62177.7	464513	2264.64
B4	14	274768	58239.7	56646.1	413195	9285.07
B5	14	177242	42429.6	44438.1	322508	1670.07
B6	14	198606	16577.1	9571.93	8440.8	2249.49
B7	14	208317	47537.7	50324.8	351293	2329.81
B8	14	223087	49673.3	54427.1	380663	1816.18
B9	14	224076	51314.8	53923.9	392291	1867.78
B10	14	305943	63591.6	64606.9	474198	2956.02
B11	14	446161	94321.5	83104.5	628128	4019.23
B12	14	236057	60574.9	50307.8	432484	1734.2
C1	14	230992	66160.1	44173.1	362931	1997.55
C2	14	229890	60649.6	47819.9	368538	1912.36
C3	14	343289	82459.8	67975.2	475198	2866.47
C4	14	258289	56289.7	56931.6	396348	2443.84
C5	14	206952	50079.6	60144.5	423156	2018.38
C6	14	218583	49397.5	55777.7	372120	2539.74
C7	14	230857	58085.9	59616.6	396223	2314.9
C8	14	235113	59304.5	60995.7	406224	1765.77
C9	14	240153	60779.7	61064.1	419554	1633.24
C10	14	274200	67620	68091.7	490137	2155.19
C11	14	384763	89947.6	82872.9	616247	3467.11
C12	14	234184	64708.7	56677.6	475994	1879.35
D1	14	260366	70789.2	51597.4	409822	2238.07
D2	14	231160	58749	50342.2	376539	1325.46
D3	14	373396	87909.6	76620.4	511161	2981.94
D4	14	326684	74241.7	69580.2	448916	2945.15
D5	14	251297	61025.3	62822.6	402147	2311.37
D6	14	259014	63201.9	62081.4	383084	1897.09
D7	14	250445	61376.4	62884.4	379520	3119.09
D8	14	243005	57002.7	64416.1	409418	1491.89
D9	14	252055	62708.8	64364.1	416249	2363.4
D10	14	283230	70028.5	69969.7	479503	2033.29
D11	14	403860	95891.1	85149	606851	2608.87
D12	14	273904	73478	61171.2	486133	1849.41
E1	14	294034	72768.4	56100.2	437481	2577.84
E2	14	275136	67550.9	56366.5	408733	1927.7
E3	14	421759	99869.4	88010	569396	3555
E4	14	417580	98361.8	92759.4	571784	3287.55
E5	14	269029	68652	69705.5	434832	1837.88
E6	14	290438	71075.6	76902	463052	2768.95
E7	14	264242	66184.8	72773.5	441487	2512.98
E8	14	290293	72754.7	79503.6	491941	2499.63
E9	14	279396	72374.9	72600.1	462894	2309.9
E10	14	304494	77707.8	78455.5	533657	2357.6
E11	14	434673	107228	98659	700375	3254.83
E12	14	283229	80080.8	68183.2	539569	2051.69
F1	14	261130	69598.4	56507.9	432528	2052.5
F2	14	248036	62202.6	56118	414264	1396.18
F3	14	442446	102768	93012.6	592049	3423.03
F4	14	441237	97812.9	89401.6	548701	3612.07
F5	14	315476	75824	75819.5	476475	2144.65
F6	14	279658	64177.5	71176.3	433652	2113.94
F7	14	300334	76793.8	87949.4	543085	2586.8
F8	14	303273	76577	85752.2	535120	3750.58
F9	14	306852	79179.8	85101.7	555356	2340.32
F10	14	327710	83250.5	85414.1	596982	2082.71
F11	14	463281	115804	103551	738467	2065.51
F12	14	292481	82124.8	70483.3	571509	2153.84
G1	14	292373	66838.3	54749.4	439128	2120.66
G2	14	289918	71914.2	60798.7	454334	2297.96
G3	14	537064	124127	105422	701844	3944.77
G4	14	489686	104434	99535.2	636221	4024.49
G5	14	322422	76416.3	76983.7	498466	2435.12
G6	14	324810	72373.5	77357	482754	3133.13
G7	14	295704	73878.5	81750.6	516478	2935.82
G8	14	289979	71421.2	77348.3	497052	3525.43
G9	14	312532	80144.9	83524.9	558518	3073.9
G10	14	284405	64087.9	64294.6	454579	1372.73
G11	14	425213	95242.2	79126.4	548417	3285.41
G12	14	259491	19861	9685.13	8046.88	1538.61
H1	14	267038	69405.2	57333.6	493276	2178
H2	14	269838	68205.2	59007.6	467814	2293.03
H3	14	494080	116290	98757.1	694398	3995.75
H4	14	438071	37519.6	20523.1	16373.8	4657.03
H5	14	265755	22668	12432.5	10515.4	3088.61
H6	14	283142	23745.7	13237.4	10438.2	3001.32
H7	14	338392	83061	93647.6	637593	3094.64
H8	14	315587	79266.3	83073.7	570020	2906.37
H9	14	330367	86372.3	86440.6	610735	3204.46
H10	14	342553	27468.7	14161.1	11537	3339.01
H11	14	494692	39975.4	20589.5	16245.8	4100.55
H12	14	265893	68344.7	51823.2	441812	1542.91
A1	15	201739	57799.3	33646.5	320004	750.381
A2	15	188982	48968.5	33721.3	288630	978.906
A3	15	323746	72486	53571.4	419653	2545.34
A4	15	339507	61663.1	59014.3	443426	2580.51
A5	15	200698	46712.5	45521.8	348167	1262.91
A6	15	234068	52440.9	49544.3	366821	1672.09
A7	15	234772	55916.4	49625.8	359720	2151.66
A8	15	221497	53936.5	52028.3	392324	2259.06
A9	15	249613	63270.3	56064.4	427386	2119.73
A10	15	267321	70451.5	56244.6	442126	2292.67
A11	15	422411	107369	75105.9	605447	0
A12	15	233359	67462.2	47565.7	426217	1905.57
B1	15	186945	47844.5	35535.4	310190	1866.34
B2	15	204947	53768.7	41015.8	336407	1377.36
B3	15	326208	74914.3	62280.4	464259	1780.13
B4	15	274821	58252.4	56857.5	413574	9489.45
B5	15	177111	42680.5	44521.7	322792	1545.36
B6	15	197810	16462	9505.47	8385.82	2337.47
B7	15	208409	47647.5	50451.2	351146	2127.18
B8	15	223273	49836.4	54383.2	381234	1990.4
B9	15	224454	51498.8	53978.1	391953	1595.09
B10	15	306077	63924.5	64681	474753	3157.16
B11	15	446245	94684.4	83271.1	628453	3905.3
B12	15	235803	60237.5	50370.6	432167	1982.74
C1	15	231473	66213.3	44330.2	362305	2040.57
C2	15	229802	60781.4	47869.2	368697	1997.31
C3	15	343929	82712.1	67968.6	474325	2818.71
C4	15	258134	56321.8	57062.8	396174	2871.65
C5	15	207770	50239.6	60389.4	422860	1965.57
C6	15	218553	49504.6	55922.2	371776	2240.24
C7	15	230961	58173.2	59692.2	396090	2094.98
C8	15	235586	59329.7	61008	405869	1580.2
C9	15	240514	60859.1	60999	419277	1286.92
C10	15	274280	67925	68314.5	490249	2245.6
C11	15	385802	90059	83111.5	617190	3282.27
C12	15	234848	64915.9	56759.5	476163	1469.65
D1	15	261064	71339.6	51463.7	409795	1732.78
D2	15	231570	59042.4	50446.7	375693	1136.25
D3	15	373086	87954.1	76654.5	511006	3185.42
D4	15	326605	74182.6	69538.6	448809	3539.32
D5	15	251347	60772.4	63040.7	402100	2220.57
D6	15	259406	63554.6	62190.7	382998	2155.21
D7	15	250594	61528.3	62917.4	379651	3057.2
D8	15	243102	57497.6	64463.7	410062	1861.52
D9	15	251929	62797	64395.1	416566	2274.02
D10	15	283164	70038.2	70123.7	479770	2184.01
D11	15	404737	96147.3	85040.8	606687	2635.83
D12	15	274454	73714.2	61171.2	486125	2069.84
E1	15	294236	72910.5	56201.3	438132	2076.21
E2	15	275608	67621.3	56637.7	408483	2059.78
E3	15	422083	99789.2	88167.4	568759	3402.56
E4	15	418020	98603	92856.6	570902	3408.73
E5	15	269323	69033.3	69825.6	434660	1692.44
E6	15	291129	70953.9	77079.1	462776	2503.28
E7	15	264239	66022.4	72866.9	441762	2318.78
E8	15	290399	72995	79493.5	491716	2496.58
E9	15	279791	72464.1	72828.9	463314	2137.3
E10	15	304910	78001.6	78554	533435	2126.95
E11	15	435183	107374	98844.8	701844	3378.64
E12	15	283415	80027.9	68323.3	541316	1889.25
F1	15	261833	69978.9	56669.7	431613	1815.22
F2	15	247363	62364.2	56108.6	414866	1125.84
F3	15	442621	103000	93043.5	592176	3461.62
F4	15	441222	97790.2	89475.6	549138	4163.18
F5	15	314956	75962.8	75540.2	476347	1835.98
F6	15	279132	64341.3	71255.9	433835	2404.12
F7	15	301391	76899	87902.2	542393	2413.71
F8	15	303491	77010.1	85841.2	534952	3471.26
F9	15	306726	79469.5	85140.3	554750	2350.03
F10	15	327653	83439.9	85254.6	597410	2064.59
F11	15	463898	115907	103507	738939	2148.26
F12	15	293090	82270.1	70571.3	571444	2010.31
G1	15	291834	66948.6	54763.3	438650	2369
G2	15	290601	72103.2	60952.2	454578	2089.39
G3	15	537820	124229	105622	702161	3956.13
G4	15	489901	104456	99602.2	636817	3966.25
G5	15	322609	76548.8	77175.3	499023	2409.21
G6	15	325548	72546	77464.7	482425	2947.03
G7	15	296315	74168.2	82093	516845	2932.08
G8	15	290539	71730.6	77416.8	497253	3210.59
G9	15	313163	80386.6	83591.5	558145	2896.37
G10	15	284986	63920.9	64291.3	454505	1642.26
G11	15	425355	95386.3	79027.2	548415	3137.94
G12	15	258670	19795.2	9544.23	7878.3	1354.77
H1	15	267724	69254.5	56976.8	491942	2121.94
H2	15	269996	68276.9	59112.4	467122	2335.39
H3	15	494396	116254	98769.1	695031	4045.65
H4	15	437831	37325.8	20494	16538	4922.29
H5	15	265315	22517.7	12423.5	10478.7	2927.66
H6	15	282484	23853.5	13068.9	10476.8	2675.09
H7	15	338625	83138.1	93734.2	638470	2815.33
H8	15	316136	79730.9	83242.3	569616	3026.97
H9	15	330861	86653.3	86596.8	610422	3263.34
H10	15	341844	27228.7	14168.6	11244.9	3314.31
H11	15	493748	40172.5	20409.9	16209.7	4120.48
H12	15	265317	67600.3	51635.5	441223	1486.22
A1	16	202218	58107.9	33553.7	318915	1040.33
A2	16	189182	49328.4	33680.8	288273	1168.95
A3	16	324705	72743.1	53595.8	419831	2100.03
A4	16	339504	61823	58958.6	443838	2689.77
A5	16	201528	46736	45479.4	347934	1335
A6	16	234605	52363.2	49735.4	366656	1615.9
A7	16	235384	55979.7	49616.1	359652	2168.55
A8	16	221408	54244.8	52086.2	392717	2290.61
A9	16	249997	63452.1	56005.1	428165	1898.99
A10	16	267985	70954.4	56395.2	442177	2043.07
A11	16	422467	107656	75163.1	606173	105.457
A12	16	234120	67116.1	47392.5	426299	1093.04
B1	16	187754	47606.5	35747.4	309893	1593.25
B2	16	205920	53626.1	41150	335797	1488.16
B3	16	326642	75413.6	62286.5	464820	2164.6
B4	16	275299	58554.9	56784.2	413399	9431.67
B5	16	177523	42503.9	44445.7	322629	1680.18
B6	16	198042	16509.8	9697.63	8438.38	2481.14
B7	16	208853	47681.7	50376.4	351094	1981.14
B8	16	223175	50073.9	54496.2	380893	1820.96
B9	16	224776	51860.3	53953.5	391622	1749.51
B10	16	306593	63877.8	64597.9	475105	3004.51
B11	16	446561	94866.9	83479.6	627731	3946.35
B12	16	236215	60446.3	50339.2	432726	1761.07
C1	16	231907	66239.2	44266.9	362705	1691.46
C2	16	230442	61192.3	47781	368594	1805.66
C3	16	344715	82615.3	68156.3	474520	2713.83
C4	16	257991	56653.9	57124.1	396025	2317.83
C5	16	207672	50505.1	60260.7	423102	2246.62
C6	16	218981	49547.3	55892.5	371427	2445.79
C7	16	231784	58170.9	59776.5	395608	2194.28
C8	16	235784	59346.3	61016.9	405510	1869.68
C9	16	241289	60925	61066.5	419017	1657.21
C10	16	275380	68197	68443.6	490211	2079.55
C11	16	386030	90270.8	83033	616905	3558
C12	16	234985	64867.3	56998.5	476738	1878.25
D1	16	261534	71227.3	51452.9	409976	2003.91
D2	16	232046	59394.4	50551.3	375597	1015.48
D3	16	373968	88096.4	76693.6	510960	3113.18
D4	16	326894	74409.8	69809.5	449450	3009.31
D5	16	252272	61221.3	62949.3	401322	2190.3
D6	16	259843	63550.1	62303	383065	2178.24
D7	16	250525	61517.1	62879.5	379722	3095.51
D8	16	243042	57192.2	64414.5	409670	1767.02
D9	16	252857	63395.2	64477.3	417212	2648.39
D10	16	283549	70355	70130.8	479178	1947.8
D11	16	404645	96487.9	85236.9	608776	2307.44
D12	16	274873	73632.6	61232	486407	1869.18
E1	16	294161	73182.5	56257.2	437722	2454.83
E2	16	275682	67511.8	56636.6	409093	1881.02
E3	16	422874	100519	88330	568615	3424.34
E4	16	418979	98786	93016.7	571368	3142.81
E5	16	270089	69083.9	69857.6	434272	1800.25
E6	16	291335	71169.5	76973.1	462526	2740.62
E7	16	264752	66621.3	73020.3	441338	2413.44
E8	16	291094	73335.4	79565.1	492192	2468.09
E9	16	280293	73046.4	73012.1	463629	2254.82
E10	16	305252	78353.7	78657.8	533373	2101.82
E11	16	435887	107974	98952.3	702139	3262.01
E12	16	284035	80234.5	68116.9	539960	2039.51
F1	16	262153	70104.7	56627.4	431420	2193.39
F2	16	248134	62388.5	55997.8	414555	953.803
F3	16	443125	103310	93077.5	592642	3257.2
F4	16	441101	98044.5	89650.9	549357	4058.31
F5	16	315286	76149.2	75606.3	476464	1708.43
F6	16	279507	64228.1	71381.8	433012	2563.28
F7	16	301612	77051.6	88100.4	542569	2647.04
F8	16	304521	77277	85794.2	535338	3376.13
F9	16	308239	79428.1	85188.5	555106	2579.75
F10	16	328050	83530.3	85499.2	597357	1995.31
F11	16	464869	116063	103671	738803	2134.98
F12	16	293770	82394.3	70788	571385	1959.6
G1	16	292541	67184.1	54650.2	439495	2596.26
G2	16	290859	72600	60829.9	453758	2177.73
G3	16	538217	124417	105393	701972	4150.59
G4	16	489983	104249	99620.9	635402	4039.29
G5	16	323026	76619.3	77134.3	499036	2456.23
G6	16	325485	72718.5	77488.4	482397	2978.51
G7	16	296925	74189.8	82116	516019	2834.94
G8	16	291268	71536.6	77549.1	497013	3321.37
G9	16	313216	80514.1	83655.2	558581	2862.89
G10	16	284281	64044.2	64567.1	454996	1308.35
G11	16	425304	95498.5	79332	548467	3264.86
G12	16	258110	19687.9	9623.81	7790.89	1650.89
H1	16	267408	69447.2	57243.1	491514	2313.92
H2	16	269923	68401.8	59232.3	467115	2347.98
H3	16	494648	116519	99034.7	692720	4076.54
H4	16	437496	37584.9	20655.1	16448.8	4746.39
H5	16	265621	22594.9	12430.5	10575.1	2854.05
H6	16	282971	23878.2	13207.3	10468.8	2940.54
H7	16	339543	83329.8	93749.5	637496	2915.84
H8	16	316939	79982.8	83367.4	570070	2755.17
H9	16	331750	86829.9	86692.5	611006	3006.39
H10	16	341952	27390	13768.8	11556.8	3520.53
H11	16	494107	39958.3	20521.1	16426.2	4646.67
H12	16	265373	68030.6	51540.7	440787	1805.08
A1	17	202336	58357.4	33523.8	318662	627.989
A2	17	189108	49360.5	33689.6	287988	1373.87
A3	17	324595	72717.2	53646.5	419951	2097.08
A4	17	339400	61909.2	59003.7	443295	2778.21
A5	17	201479	46907.2	45534.1	348047	1545.62
A6	17	234965	52832.4	49757.7	367207	1659.25
A7	17	235447	55834.9	49549.4	359363	2084.9
A8	17	221635	54414.6	52161.6	392006	2198.46
A9	17	250962	63614.9	56058.6	426796	2005.98
A10	17	268536	71138.5	56433.1	441440	2373.19
A11	17	423432	108002	75126.5	605051	0
A12	17	233689	67692.5	47643.8	425428	1888.99
B1	17	187496	47483	35631.9	309635	1818.38
B2	17	206086	53600.4	41101.8	335376	1410.6
B3	17	327505	75779.8	62509.2	465442	2118.5
B4	17	275834	58418.9	56848.9	413197	9543.78
B5	17	177798	42635.9	44543.7	322274	1695.35
B6	17	198122	16494.4	9596.75	8460.21	2198.64
B7	17	209146	47931.8	50505.8	350963	2096.6
B8	17	223355	49968.4	54541.7	380980	1950.63
B9	17	225675	52032.9	54047.2	391539	1623.02
B10	17	306913	63846.4	64748	475179	2634.56
B11	17	446709	95088	83281.3	627101	3961.75
B12	17	236419	61029.2	50563.4	432395	1717.41
C1	17	232176	66620.3	44427.6	362567	1660.73
C2	17	230767	61215.2	47797.8	368713	2041.86
C3	17	344498	82646.9	67960.1	474521	2749.41
C4	17	258967	56684.1	57094.9	395898	2734.91
C5	17	208123	50477.5	60265.2	423301	1859.05
C6	17	219359	49662.2	55942.3	371762	2397.61
C7	17	231817	58397	59704.1	395668	2115.5
C8	17	235891	59410.9	61056.1	405530	1415.25
C9	17	241219	61190.9	61063.3	418728	1348.08
C10	17	275121	68211.4	68482.3	491095	2361.23
C11	17	385953	90483.6	83128.6	617546	3328.22
C12	17	235370	65244.7	56808.2	476114	1760.72
D1	17	262195	71300.1	51483.9	410277	2144.41
D2	17	232636	59325.5	50630.5	376341	1356.65
D3	17	375001	88221	76845	510671	3051.12
D4	17	327579	74292.6	69914.1	449127	3080.37
D5	17	252143	61058.5	63193	402066	1882.59
D6	17	260541	63958.5	62466.5	383873	2059.25
D7	17	250604	61008.9	63042.7	379342	3083.72
D8	17	243038	57203.5	64511.2	409919	1458.44
D9	17	253063	63199.1	64364.9	417143	2482.28
D10	17	284346	70283.5	70185.7	479889	2067.67
D11	17	405208	96605.7	85262.1	608449	2648.35
D12	17	275591	74097.6	61217.8	486427	1970
E1	17	293444	72756.1	56200	437514	2719.99
E2	17	275807	67833.5	56664.5	408824	1942.5
E3	17	423557	100318	88453.1	568374	3501.65
E4	17	419045	98846.3	93004.6	571271	2967.77
E5	17	270111	69225	69713.5	434171	1562.25
E6	17	291686	71422.9	77035.3	462859	2251.3
E7	17	265096	66606.2	72964.2	441407	2442.72
E8	17	291411	72961.6	79910	492477	2338.89
E9	17	280792	72964.5	72901.8	464084	1938.08
E10	17	305874	78212.2	78796.2	533447	2214.9
E11	17	436868	107827	98855.8	702545	2930.96
E12	17	284186	80344.8	68191.5	539700	2154.03
F1	17	262177	70278.3	56470.1	431421	2185.97
F2	17	247812	62554.9	56184	413983	1234.68
F3	17	443699	103346	93075.4	592134	3483.52
F4	17	441379	97943	89735	548832	3527.75
F5	17	315187	76148.2	75620	476191	1992.46
F6	17	279623	64121.8	71296.1	433452	2134.16
F7	17	302524	77505	88149.5	542381	2787.62
F8	17	304841	77488.2	85905.2	535599	3662.54
F9	17	308408	79654	85138.1	555664	2530.14
F10	17	328681	83772.9	85473.7	597086	2243.66
F11	17	465153	116131	103744	738517	2282.08
F12	17	293262	82518.5	70634.3	570772	2009.45
G1	17	292917	67480.5	54831.5	438649	2308.79
G2	17	290557	72892.5	60841.2	453984	2320.05
G3	17	538985	124151	105699	701619	3967.5
G4	17	489598	104174	99876.1	636221	4096.55
G5	17	323651	76781	77287.8	499177	2441.83
G6	17	325674	72666	77446.4	482478	2812.78
G7	17	297120	74421	82258.1	516757	2861.09
G8	17	290840	71766.5	77693.9	497222	3305.82
G9	17	313838	80708.3	83668.3	558571	2648.83
G10	17	284609	63892.5	64496.6	455146	1775.38
G11	17	426133	95671.9	79073.7	547955	3673.42
G12	17	258482	19895.3	9561.19	8081.85	1854.48
H1	17	266601	69384.2	56840.2	491145	2228.97
H2	17	270206	68586	59091.4	467243	2459.03
H3	17	495449	116529	99141.7	694284	4504.28
H4	17	436964	37665.2	20627	16724.9	4847.98
H5	17	265113	22761.1	12421.5	10466.8	3323.18
H6	17	282710	23682.1	12862.1	10489.4	2946.8
H7	17	339828	83307.7	93967.8	638031	2881.05
H8	17	317010	80360	83212.7	570099	2715.28
H9	17	331395	86959.1	86569.2	610881	3135.93
H10	17	341694	27361.6	14034.5	11546.9	3137.73
H11	17	492966	39881.1	20313.4	16454.3	4488.55
H12	17	266204	68201.9	51579.7	440078	1440.16
A1	18	202390	58171.9	33534.3	318817	776.608
A2	18	189435	49420.2	33614.1	288402	1189.13
A3	18	325221	72823.9	53612	419992	2452.16
A4	18	339950	61871.9	59312.3	443442	2798.16
A5	18	201959	46822	45619.8	348167	1495.4
A6	18	235214	52655.3	49768.1	367554	1570.15
A7	18	235849	55944.1	49755.2	359452	2164.53
A8	18	221984	54438.5	52228.7	392465	2115.43
A9	18	251236	63753.9	56080.6	427368	2011.77
A10	18	269165	71238.7	56289.5	441810	2080.31
A11	18	423954	108022	75400.9	606052	0
A12	18	234184	67610.6	47635.2	425077	1513.13
B1	18	187195	47650.5	35634.6	309324	1911.64
B2	18	206872	54011.7	41073.1	336100	1237.74
B3	18	327618	75604.3	62429.9	465400	2475.51
B4	18	275536	58605.8	56974	413564	9500.66
B5	18	177528	42800.2	44627.3	322799	1917.8
B6	18	197592	16489	9522.29	8547.53	2249.49
B7	18	209727	48082.3	50502.1	350736	2151.65
B8	18	223909	50172.5	54606.8	381213	1943.47
B9	18	225295	51980.7	54119.5	391688	1710.9
B10	18	307447	64109.2	64693.5	475454	2577.09
B11	18	446389	94900.3	83304.8	628028	3750.32
B12	18	236643	60914.8	50278.6	432351	1930.12
C1	18	232570	66764.2	44484.9	361954	1809.47
C2	18	230439	61288.2	47868.1	367896	2000.42
C3	18	345066	82896.4	68244.5	474561	2924.53
C4	18	259190	56601.1	57063.8	396247	2671.42
C5	18	208431	50555.3	60428.8	423224	1996
C6	18	219643	49667.7	55891.7	372133	2381.56
C7	18	232117	58217.9	59826.6	396015	2411.73
C8	18	235758	59435.3	61188.1	405411	1741.02
C9	18	241366	61374.3	61133.3	418950	1537.36
C10	18	275621	68291.9	68536.5	491350	2208.22
C11	18	385966	90220.6	83272.5	617225	3432.39
C12	18	235347	65335	56898.9	476280	1772.8
D1	18	262230	71328.5	51643.9	410148	1960.78
D2	18	232472	59384.2	50650.8	375530	1097
D3	18	374754	88269.4	76670.5	510830	3298.35
D4	18	327525	74316.2	69876.3	449417	3146.5
D5	18	252404	61341.8	63105.5	402400	2357.78
D6	18	260874	64037.5	62382.8	383462	2352.89
D7	18	250644	61233.9	63022.3	379924	3002.18
D8	18	243312	56963.8	64574.6	409735	2003.68
D9	18	253609	63485.9	64560.2	416985	2453.62
D10	18	284794	70321.5	70121.1	479541	2102.92
D11	18	405630	96632.2	85249.5	607500	2239.06
D12	18	275392	73874.2	61371.9	486235	2235.9
E1	18	294389	73224.9	56412.8	437392	2163.69
E2	18	276139	67795.5	56637.7	409007	2030.18
E3	18	423597	100527	88470.2	569070	3079.18
E4	18	419835	98992.3	93037.7	570661	3306.62
E5	18	270676	69221.2	69854.6	434200	1790.08
E6	18	292215	71403.6	77027.6	462266	2641.98
E7	18	265653	66509.8	73116.6	441806	2302.19
E8	18	292535	73534.5	79879.8	492558	2421.29
E9	18	281395	72879.9	73080.5	464050	2524.73
E10	18	306406	78638.6	78721.7	533637	2172.72
E11	18	437648	107994	98866.7	702008	3130.13
E12	18	284786	80333.4	68246.2	539206	1926.61
F1	18	262678	70364.3	56563.9	431045	2083.64
F2	18	247983	62906	56149.8	414534	1519.06
F3	18	443893	102958	93246.7	592106	3317.69
F4	18	441789	97746.8	89606.3	549245	3595.62
F5	18	316357	76371.1	75858.4	476061	2321.5
F6	18	279443	64133.6	71455.3	433385	2133.28
F7	18	303037	77247.2	88330.8	542605	2485.43
F8	18	305474	77066.8	85945.2	535404	3590.68
F9	18	309286	79919.3	85401.6	554681	2166.69
F10	18	329033	83893.1	85647	597540	2254.32
F11	18	465798	116519	103818	738408	1932.72
F12	18	294009	82718.2	70742.7	571540	2139.23
G1	18	292949	67457.5	54836.1	439233	2232.03
G2	18	291008	72720.1	60868.6	454330	1807.21
G3	18	539776	124501	105810	702189	3583.63
G4	18	490263	103766	99979.6	637373	3992.9
G5	18	323390	76979.4	77343.1	499034	2680.74
G6	18	326135	72796.7	77547.7	481986	2895.18
G7	18	297092	74388.6	82359.6	517396	3071.26
G8	18	291239	71606.6	77671.7	497387	3375.79
G9	18	314386	80951.1	83933.9	558339	2768.54
G10	18	284923	64155.5	64733.3	454766	1344.36
G11	18	426362	95710.1	79376	548544	3301.12
G12	18	258414	19730.8	9651.21	8043.13	1776.74
H1	18	266541	69258.3	56748	490117	2733.55
H2	18	270150	68551.3	59182.3	467541	2560.92
H3	18	495004	116384	99231.8	694024	4005.25
H4	18	437296	37545.2	20509	16383.3	4943.92
H5	18	264943	22584.9	12386.5	10390.3	3066.04
H6	18	282231	23589.3	13181.5	10333.2	2896.74
H7	18	339802	83552.4	94041.8	636522	2972.86
H8	18	317723	80171.4	83319.2	569393	2614.16
H9	18	332290	87164.8	86561.8	610775	2858.64
H10	18	341909	27267.4	13992.3	11341.1	2951.27
H11	18	493915	39979.7	20409.9	16358.1	4212.17
H12	18	264899	68312	51391.9	438774	1546.45
A1	19	202484	57856.8	33652.5	318579	1199.15
A2	19	189613	49533.6	33665.5	288118	1220.98
A3	19	325598	72919.3	53713.5	419850	2236.37
A4	19	339623	62046	59009	443469	2980.25
A5	19	201899	47045.1	45634.5	348199	1394.95
A6	19	235135	52642.1	49669.3	367146	1378.29
A7	19	236035	56210.7	49575.9	359902	1800.96
A8	19	222329	54510.2	52332.3	392447	2345.41
A9	19	251637	63887.2	56238.5	427130	1997.31
A10	19	269045	71159.8	56222.7	442077	2290.66
A11	19	424251	108490	75309.4	606293	112.261
A12	19	235194	67686.3	47437.9	424435	1615.38
B1	19	186826	47465.4	35501.5	309063	2007.55
B2	19	206838	54011.7	41258.9	335828	1411.71
B3	19	328012	75792.9	62572.2	465074	2206.77
B4	19	276102	58387.5	56981.8	413378	9327.33
B5	19	178188	42839	44625.6	322546	1954.88
B6	19	198202	16399.4	9594.34	8095.57	2362.49
B7	19	209847	48138.2	50535	351013	2095.07
B8	19	224109	50004.1	54787.3	381318	1859.14
B9	19	225836	52141.1	54168	391193	1589.34
B10	19	307296	64219.6	64745.3	475600	2775.53
B11	19	447418	95148.5	83640.1	628083	3933.01
B12	19	236668	61102.4	50524.2	432768	2168.59
C1	19	231788	66774.5	44430.1	361870	1825.45
C2	19	230924	61646.8	47952.1	367880	1812.91
C3	19	345090	83034.1	68169.4	474618	2795.3
C4	19	259060	56703.9	57081.3	396469	2585.47
C5	19	208812	50890.9	60555.7	422904	1904.7
C6	19	219621	49767	55876.4	371677	2473.09
C7	19	232628	58770.4	59834.6	395669	2097.45
C8	19	236553	59507	61235.4	405738	1593.4
C9	19	242084	61610.8	61330.3	418606	1248.9
C10	19	276353	68438.5	68560.6	490607	2336.02
C11	19	387809	90806.8	83258.4	617528	3687.7
C12	19	235317	65446.1	56880.1	476321	1794.77
D1	19	261232	71446.9	51504.2	409403	2312.02
D2	19	232894	59553	50396	375223	1007.43
D3	19	375281	88357.4	76918.2	510564	3147.77
D4	19	327415	74296.2	69821.2	449213	3386.34
D5	19	252116	61208.4	63120.3	401868	2027.87
D6	19	261179	64259.1	62476	384083	1921.08
D7	19	250856	61054.3	63079.6	380024	3225.19
D8	19	243221	57031.8	64639.7	409879	1746.95
D9	19	253918	63547.7	64622.2	417256	2300.16
D10	19	284606	70546.5	70348.6	479885	2229.84
D11	19	406387	96989.6	85526.8	608067	2447.08
D12	19	275544	74357.4	61338.4	486380	1912.67
E1	19	294536	73101.9	56287.8	437554	2577.84
E2	19	276465	67602.3	56701.3	408837	1517.79
E3	19	423741	100493	88519.5	569484	3622.5
E4	19	419763	99125.6	93258.6	570448	3393.02
E5	19	270862	69538.6	70038.8	433668	1944.68
E6	19	292092	71294.8	77173.5	462838	2515.98
E7	19	265583	66633.6	73184.4	441500	2557.88
E8	19	292827	73459	79861.6	492344	2241.22
E9	19	281885	73285.7	73030.4	463985	2518.31
E10	19	306726	78743.1	78894.7	533277	1924.13
E11	19	438036	108368	99181	701820	3395.68
E12	19	284582	80781.9	68268.6	539583	1946.1
F1	19	263007	70760.7	56526.1	431175	2052.5
F2	19	248763	62952.2	56188.7	413980	1537.79
F3	19	443862	103599	93337.2	591608	3472.05
F4	19	441141	97651.2	89645.9	549285	3796.11
F5	19	316317	76545.4	75982.3	475760	1915.29
F6	19	279862	64001.1	71577.7	433387	2062.06
F7	19	303178	77382.5	88350.6	542170	3103.2
F8	19	305854	77691.5	86172.2	535236	3728.32
F9	19	309590	80060.4	85498	555751	2485.92
F10	19	328966	83852.7	85680	598252	1927.09
F11	19	465852	116697	103774	737479	1955.19
F12	19	294282	83044	70779.2	571315	2415.98
G1	19	292142	67554.6	54675	438348	2406.62
G2	19	291637	72994.6	60932.2	454721	1767.95
G3	19	539047	124473	105698	702393	3839.96
G4	19	489770	103953	100078	637391	4105.43
G5	19	323817	77045.2	77302.1	499225	2370.83
G6	19	326016	72805.6	77611.6	482930	3072.95
G7	19	297242	74455.2	82264.6	516939	3007.74
G8	19	291278	71826.1	77802.9	497396	3204.76
G9	19	313893	81052.2	83775.4	558334	2764.49
G10	19	284759	64195.9	64637.7	454723	1959.8
G11	19	426560	96133.4	79496	548804	3581.56
G12	19	258001	19652.2	9913.43	7840.84	1953.18
H1	19	266760	69432	56968.3	490012	2482.11
H2	19	270045	68961.8	59325.4	467109	2139.63
H3	19	495310	116230	99046.7	694571	4083.67
H4	19	437374	37419.4	20499.6	16324.5	4563.91
H5	19	264853	22361.5	12393.5	10337.6	2848.16
H6	19	282543	23869.4	13009.4	10523.5	2871.72
H7	19	340099	83831.8	94096.6	636807	3384.58
H8	19	317593	80321	83445.2	570882	2886.89
H9	19	332431	87457.7	86754.1	610958	2887.54
H10	19	341130	27156.4	14094.1	11439.7	2800.62
H11	19	493607	39981.1	20360.3	16200.3	4423.44
H12	19	265730	68724	51310.1	438374	1333.88
A1	20	203305	58112.8	33715.3	318049	830.518
A2	20	190261	49743.4	33826.2	288183	983.153
A3	20	325269	72942.1	53684.1	419980	2284.43
A4	20	339821	62143.7	59125.7	443182	2823.3
A5	20	202006	47114	45703.1	348121	1378.75
A6	20	235345	52830.8	49902.7	367257	1800.53
A7	20	236200	56080.2	49731.1	359820	2214.4
A8	20	222218	54601.7	52167.4	392038	1961.84
A9	20	251703	63911	56143.8	427284	2255.65
A10	20	269048	71244.8	56540.7	442137	1927.33
A11	20	425170	108695	75256.8	605133	0
A12	20	234603	68055.7	47584.1	424395	1825.42
B1	20	186519	47054	35631.9	309080	2191.39
B2	20	206663	54064.3	41230.2	335994	1892.62
B3	20	328647	75663.8	62615.9	465096	2504.93
B4	20	275890	58592.2	57121.6	413417	9652.44
B5	20	178288	42788.6	44716.8	323082	1874.83
B6	20	198014	16437.2	9572.73	8395.53	2585.26
B7	20	210351	48206.6	50547.7	350975	2268.64
B8	20	223986	50353.8	54599.8	381144	2409.65
B9	20	225874	52225.8	54230.5	391027	1611.52
B10	20	307487	64169.4	65042.8	475923	2906.63
B11	20	447570	95074.4	83506.2	628302	3809.85
B12	20	236814	60869.9	50347	433131	2044.32
C1	20	232367	66652.7	44617.7	362040	1976.65
C2	20	231076	61556.3	47993.1	367689	1827.42
C3	20	345486	83234.2	68305.5	474865	2705.4
C4	20	259329	57050.1	57376.8	396319	2769.09
C5	20	208468	50907.3	60488.7	423398	2067.6
C6	20	219634	49796.5	56115.6	372067	2348.63
C7	20	232792	58713.5	59966.7	395147	2291.93
C8	20	236378	59378.6	61170.2	405396	1903.5
C9	20	242513	61468.7	61193.6	419060	1341.47
C10	20	276078	68303.8	68815.3	491267	2226.47
C11	20	387340	90820.8	83457.7	617791	3400.73
C12	20	235935	65492.4	56956.4	476480	1425.71
D1	20	262254	71629.6	51723.9	409393	2302.16
D2	20	233493	59753.7	50609.2	375841	1038.63
D3	20	375072	88420.7	77010.4	510772	3207.8
D4	20	327913	74258.9	70014.7	449451	3088.27
D5	20	252484	61196.4	63251.9	402126	2566.62
D6	20	261507	64267.2	62685.3	383711	2175.36
D7	20	250434	60718.2	63066	379834	3298.87
D8	20	243428	57000.2	64603	409901	1930.93
D9	20	254369	63470.2	64705.2	416799	2521.07
D10	20	285432	70846.5	70468.9	479817	2086.17
D11	20	406648	97013.1	85586.7	607310	2318.99
D12	20	275931	74256.5	61286.8	486447	2241.83
E1	20	294453	73254.9	56285.1	437351	2100.82
E2	20	276325	67927.3	56685.7	408443	1860.52
E3	20	423015	100596	88548.3	569643	3328.52
E4	20	420282	98846.3	93370.1	570452	3517.56
E5	20	270761	69302.2	69808.6	433340	1749.39
E6	20	291929	71411.9	77149.2	461945	2520.87
E7	20	266176	66715.8	73165.8	442160	2488.59
E8	20	293029	73518.8	79863.6	492690	2363.3
E9	20	282653	73294.8	73083.2	463454	2247.47
E10	20	306959	78720	79089	533219	2006.69
E11	20	438518	108403	98986	701211	3256.63
E12	20	285067	80732.5	68253.7	539434	1734.11
F1	20	263278	70900.9	56745.3	431219	1948.69
F2	20	248225	62632.7	56237.1	413984	1233.51
F3	20	443851	103089	93562.8	592306	3339.59
F4	20	441937	97819.8	89682.3	548810	3703.58
F5	20	316229	76215.1	76032.7	476149	2176.81
F6	20	279163	64012.9	71480.6	433231	2038.31
F7	20	304075	77453.9	88331.7	542079	2870.82
F8	20	307139	77957.4	86277.2	535256	3474.3
F9	20	310314	80275.7	85411.2	554664	2276.69
F10	20	329261	83900.5	85638.5	598012	2176.51
F11	20	466573	116848	103966	738162	2228.96
F12	20	294148	82915	70755.2	570749	2180.49
G1	20	292334	67755.5	54637.8	438737	2542.08
G2	20	292311	72935.9	61032.1	454375	2264.84
G3	20	539442	124292	106049	703532	4317.27
G4	20	489969	103790	99994.3	636501	4160.71
G5	20	323530	77044.3	77315.4	498897	2319.98
G6	20	325743	73055.5	77627.1	482259	3163.68
G7	20	297586	74472.3	82170.5	517268	3004.94
G8	20	291419	71742.9	77876.3	497134	3464.21
G9	20	315208	80997.6	83952.1	558613	3146.95
G10	20	284907	63973.3	64752.9	454587	1752.47
G11	20	427796	95861.9	79679.6	548311	3487.27
G12	20	257891	19809.5	9615.99	7965.71	1777.98
H1	20	265759	68674.2	56777.1	488894	2329.21
H2	20	270215	68541.5	59397.6	467310	2243.81
H3	20	495129	116520	99338.8	692952	4059.91
H4	20	437693	37587.7	20792.8	16594.9	4674.9
H5	20	264310	22461.7	12419.5	10294.9	3259.39
H6	20	282092	23920.6	13203.7	10165.3	2900.32
H7	20	340310	83791.4	94151.4	637922	2988.33
H8	20	318475	80715.9	83385.9	570495	3001
H9	20	331968	87423.3	86939.1	610530	3125.23
H10	20	340882	27617.1	14092.8	11396.5	3432.86
H11	20	493385	40088.2	20427.3	16134.8	4448.69
H12	20	266316	68228.4	51568.5	437355	1487.99
A1	21	202918	58204.7	33565.7	317978	1255.98
A2	21	190154	49546.3	33709.2	288199	1203.99
A3	21	325631	73196.1	53809.9	420442	2237.35
A4	21	339532	61982	59204.4	443047	2866.66
A5	21	202013	46979.4	45709.6	348254	1279.11
A6	21	235418	52719	49823	367211	1666.48
A7	21	236981	56248.7	49680.5	359673	1977.92
A8	21	222877	54676.7	52319.8	392148	2143.66
A9	21	252037	64424.1	56310.3	427119	2154.43
A10	21	269985	71259.9	56615.5	441908	2103.46
A11	21	424979	108939	75509.4	606010	0
A12	21	234568	67862.5	47472	423865	1952.55
B1	21	186546	47009.9	35542.2	308869	2144.76
B2	21	207302	54409.1	41317.4	336242	1302.01
B3	21	328469	75861.5	62663.7	465073	2149.89
B4	21	275381	58495.4	57055.1	413485	9468.76
B5	21	178000	42892.6	44731.1	322814	1708.83
B6	21	197940	16580.9	9509.47	8407.65	2313.26
B7	21	210482	48333.1	50680.1	351221	2170
B8	21	224346	50379.6	54734	381028	1879.83
B9	21	226891	52284.4	54149.1	391355	1747.04
B10	21	307618	64069.8	65091	475819	2912.02
B11	21	447735	95440.5	83573.6	627635	3739.03
B12	21	237127	61187.3	50536.5	432169	2112.61
C1	21	232674	66596.9	44425.2	361576	1475.11
C2	21	231626	61598.8	48015.1	367940	1873
C3	21	345972	82993.2	68275.4	474324	2853.36
C4	21	259284	56695.4	57339.8	396472	2648.95
C5	21	208626	50916.9	60500.3	422787	2100.72
C6	21	219810	49833.8	56028.1	372081	2296.44
C7	21	233375	58567.8	59897.5	395255	2143.4
C8	21	237310	59406.9	61242.7	405284	1651.95
C9	21	242957	61720.3	61058.4	418825	1572.9
C10	21	276482	68483.4	68745.6	491130	2440.34
C11	21	387448	90814.8	83655	617786	3315.97
C12	21	236477	65321.1	56938.7	476281	1212.62
D1	21	261998	71665.4	51669	409056	1809.19
D2	21	232820	59744.4	50800.1	375913	929.932
D3	21	375591	88726.2	77104.7	511001	2929.04
D4	21	327328	74260.8	69977.9	449459	3252.11
D5	21	252224	60999.6	63156.6	402333	2581.75
D6	21	261775	64528.4	62715.7	384469	2231.98
D7	21	250826	60549.7	63270	379728	3119.09
D8	21	243483	56697.3	64784	410145	1749.46
D9	21	254846	63846	64749.6	417079	2634.9
D10	21	285450	70593.3	70410.5	480211	2056.21
D11	21	406348	96972.9	85476.6	607542	2650.28
D12	21	276102	74486.3	61361.8	486432	2222.06
E1	21	294031	73216.7	56485.9	437985	2420.66
E2	21	276448	68170.8	56680.1	408421	2039.29
E3	21	423479	100513	88643.6	569925	3365.54
E4	21	420856	99332.9	93175.8	570584	3555.71
E5	21	270675	69558.7	69750.5	432981	1813.47
E6	21	292425	71555.6	77135.6	462532	2473.98
E7	21	267020	66788.5	73333.9	441839	2548.12
E8	21	293379	73720.9	79909	492420	2050.98
E9	21	283630	73518.7	73033.1	464150	2325.51
E10	21	307866	78847.5	79071.3	533240	2021.95
E11	21	438635	108405	99167.3	702274	3422.6
E12	21	285536	80963.8	68265.3	539000	1929.05
F1	21	262810	70450.2	56695.4	431418	1833.01
F2	21	248700	62783.3	56326.7	414153	1230
F3	21	444056	103300	93369.1	591949	3605.55
F4	21	441933	97714.3	89701.6	549210	3921.55
F5	21	316673	76391.4	75969.7	476184	2070.7
F6	21	279321	63892.2	71485.9	433096	2203.63
F7	21	304692	77580	88464.8	542129	3181.62
F8	21	307653	78242.9	86186.2	535557	3736.41
F9	21	311114	80561.1	85510.8	554994	2181.79
F10	21	329926	83826.1	85884.1	598863	2413.13
F11	21	467349	117121	103970	737716	2025.67
F12	21	294831	83169.1	70790.7	570404	2079.93
G1	21	292596	67510.2	54961.6	438578	2171.83
[truncated: 10,967 more rows]

## Sheet: Multicomponent Data
Block Type	96alum
Chemistry	SYBR_GREEN
Experiment File Name	D:\HAIFENG\118Untitled.eds
Experiment Run End Time	2021-08-28 18:15:02 PM CST
Instrument Type	sds7500
Passive Reference	ROX
Well	Cycle	SYBR	ROX
A1	1	203341	327684
A2	1	187021	290840
A3	1	319129	417719
A4	1	336131	443999
A5	1	197541	348067
A6	1	227931	367091
A7	1	228829	361513
A8	1	219403	395220
A9	1	247899	433469
A10	1	264035	444250
A11	1	419418	608814
A12	1	239007	440834
B1	1	189646	314477
B2	1	200747	334547
B3	1	319142	461560
B4	1	269323	407131
B5	1	173340	321448
B6	1	198847	9332.09
B7	1	200921	350180
B8	1	216642	379035
B9	1	220620	394093
B10	1	300851	472888
B11	1	446182	628796
B12	1	238506	440762
C1	1	231488	369662
C2	1	227801	371011
C3	1	336695	471607
C4	1	252751	392979
C5	1	202473	422503
C6	1	211929	369098
C7	1	223599	395605
C8	1	231865	404054
C9	1	235241	419472
C10	1	265819	484608
C11	1	377043	609837
C12	1	235429	481021
D1	1	257632	414084
D2	1	227973	377190
D3	1	365481	507266
D4	1	320422	444257
D5	1	247094	400402
D6	1	247837	380626
D7	1	247230	378352
D8	1	239207	405277
D9	1	245399	411582
D10	1	276419	474779
D11	1	393255	597771
D12	1	274453	491193
E1	1	294573	440926
E2	1	271174	406840
E3	1	412317	559944
E4	1	409243	568056
E5	1	262590	436099
E6	1	283532	463766
E7	1	256970	439585
E8	1	282468	486444
E9	1	270471	458560
E10	1	293070	530247
E11	1	425566	697844
E12	1	286942	548560
F1	1	262655	443122
F2	1	243319	416028
F3	1	432131	587656
F4	1	435215	544267
F5	1	309258	477092
F6	1	276688	433550
F7	1	292723	541200
F8	1	292948	530603
F9	1	297457	550099
F10	1	319429	588106
F11	1	448670	730218
F12	1	292988	578134
G1	1	296651	451111
G2	1	285315	454374
G3	1	525848	695023
G4	1	486360	630983
G5	1	314464	497706
G6	1	320265	482279
G7	1	287710	512045
G8	1	283325	492540
G9	1	304096	553063
G10	1	284026	452478
G11	1	418719	544956
G12	1	263490	8653.46
H1	1	275008	505985
H2	1	269249	475592
H3	1	492420	698697
H4	1
H5	1
H6	1
H7	1	335159	643093
H8	1	310644	569850
H9	1	326545	617014
H10	1
H11	1
H12	1
A1	2	202867	328217
A2	2	186532	290626
A3	2	319924	418271
A4	2	336606	444403
A5	2	198134	347763
A6	2	229035	366468
A7	2	229629	359740
A8	2	219555	393676
A9	2	247725	431021
A10	2	264973	443072
A11	2	418410	608303
A12	2	237663	440853
B1	2	189390	313444
B2	2	201379	334017
B3	2	320769	462054
B4	2	271063	409098
B5	2	173997	321158
B6	2	198784	9407.23
B7	2	202330	350331
B8	2	218049	379673
B9	2	221162	394329
B10	2	303304	473862
B11	2	446400	627677
B12	2	238353	438886
C1	2	231961	368481
C2	2	226880	370226
C3	2	337703	472568
C4	2	253848	393787
C5	2	203134	423032
C6	2	213552	369800
C7	2	225610	396478
C8	2	233018	405323
C9	2	236502	420037
C10	2	268319	485576
C11	2	379075	610946
C12	2	234870	479731
D1	2	258402	413382
D2	2	228028	376828
D3	2	367063	508304
D4	2	322276	445165
D5	2	248205	400996
D6	2	250621	380848
D7	2	248648	378543
D8	2	240795	406644
D9	2	246270	412693
D10	2	278092	475392
D11	2	396370	601801
D12	2	274179	490300
E1	2	295294	440653
E2	2	271790	405979
E3	2	415155	562156
E4	2	411185	570171
E5	2	264915	436622
E6	2	285731	463465
E7	2	259025	440929
E8	2	283640	487474
E9	2	272504	460450
E10	2	295195	530931
E11	2	428396	699828
E12	2	286749	549074
F1	2	263054	442881
F2	2	243600	415603
F3	2	435136	589316
F4	2	436946	545316
F5	2	311111	477380
F6	2	278213	433708
F7	2	295517	541292
F8	2	295203	532015
F9	2	299792	551935
F10	2	322310	589950
F11	2	451213	731424
F12	2	294144	578044
G1	2	296483	450199
G2	2	285365	453318
G3	2	528655	696422
G4	2	487655	630259
G5	2	316349	498010
G6	2	321870	482776
G7	2	290032	512050
G8	2	285451	493420
G9	2	306275	553727
G10	2	284310	452579
G11	2	418529	546019
G12	2	262421	8751.24
H1	2	274707	505956
H2	2	269799	475030
H3	2	493077	699334
H4	2
H5	2
H6	2
H7	2	336618	644272
H8	2	311524	569114
H9	2	328171	616047
H10	2
H11	2
H12	2
A1	3	201982	326224
A2	3	186949	289553
A3	3	319308	418122
A4	3	336510	443205
A5	3	198543	347318
A6	3	229816	365922
A7	3	230135	359560
A8	3	219265	393295
A9	3	247469	428890
A10	3	264550	442135
A11	3	418621	606015
A12	3	236033	435854
B1	3	189091	312138
B2	3	202480	334925
B3	3	321591	462389
B4	3	272006	409986
B5	3	174890	321785
B6	3	198743	9437.26
B7	3	203684	350185
B8	3	218352	379473
B9	3	220099	391957
B10	3	303587	472737
B11	3	444434	625599
B12	3	235385	435044
C1	3	230851	365882
C2	3	227682	369441
C3	3	338575	473338
C4	3	254894	394245
C5	3	203875	422483
C6	3	214898	370120
C7	3	226724	396392
C8	3	233120	405615
C9	3	237382	419815
C10	3	269334	486887
C11	3	380058	611947
C12	3	234538	478008
D1	3	259287	412989
D2	3	227754	375993
D3	3	367435	508593
D4	3	323309	446326
D5	3	249408	400727
D6	3	251710	381290
D7	3	249494	378452
D8	3	241283	407354
D9	3	247409	413372
D10	3	278714	476467
D11	3	396657	601760
D12	3	272225	486003
E1	3	295377	439500
E2	3	272372	406371
E3	3	417150	564101
E4	3	413191	570936
E5	3	266398	437627
E6	3	286995	464462
E7	3	260147	441391
E8	3	284987	488550
E9	3	274396	460959
E10	3	296904	532562
E11	3	429323	700668
E12	3	284327	544935
F1	3	261337	438782
F2	3	244581	414302
F3	3	437343	591578
F4	3	438260	546787
F5	3	312176	478238
F6	3	279609	434982
F7	3	296581	543181
F8	3	296342	533030
F9	3	300862	553348
F10	3	323842	591527
F11	3	452520	734489
F12	3	293248	575674
G1	3	294841	447594
G2	3	286036	452550
G3	3	529939	696522
G4	3	489103	632191
G5	3	318044	498807
G6	3	323142	483229
G7	3	291640	514272
G8	3	286151	494809
G9	3	308088	554806
G10	3	284349	453518
G11	3	419671	546813
G12	3	261492	8805.21
H1	3	273482	504648
H2	3	269395	472981
H3	3	493310	698584
H4	3
H5	3
H6	3
H7	3	337010	642439
H8	3	311871	570072
H9	3	328657	613660
H10	3
H11	3
H12	3
A1	4	202526	325943
A2	4	187082	289398
A3	4	320624	418144
A4	4	337122	443841
A5	4	199333	347370
A6	4	230772	366468
A7	4	231580	359418
A8	4	219448	392905
A9	4	248256	428614
A10	4	265364	442104
A11	4	419407	605287
A12	4	235309	433967
B1	4	189322	311976
B2	4	203100	335062
B3	4	322792	463215
B4	4	273240	411614
B5	4	175450	321983
B6	4	198882	9478.69
B7	4	204532	350476
B8	4	219126	379685
B9	4	220781	392021
B10	4	304013	472504
B11	4	444781	625481
B12	4	235604	434539
C1	4	231254	364651
C2	4	228161	369705
C3	4	339472	473468
C4	4	256077	394890
C5	4	204836	423472
C6	4	215511	370643
C7	4	227660	397373
C8	4	234085	405741
C9	4	238094	419694
C10	4	270384	487218
C11	4	380913	612813
C12	4	234647	477738
D1	4	259418	412061
D2	4	228753	375574
D3	4	368366	509868
D4	4	324620	447258
D5	4	250232	401808
D6	4	253256	382129
D7	4	250166	379521
D8	4	242097	408279
D9	4	248354	414512
D10	4	279911	477860
D11	4	398451	604739
D12	4	272647	486269
E1	4	295752	438814
E2	4	273606	407239
E3	4	419290	565881
E4	4	413730	571989
E5	4	267333	438011
E6	4	288172	465164
E7	4	261122	442384
E8	4	286439	489769
E9	4	275732	462181
E10	4	298626	533237
E11	4	430055	701820
E12	4	283658	544309
F1	4	261918	437352
F2	4	245631	414597
F3	4	439051	592244
F4	4	439495	548055
F5	4	312885	477837
F6	4	279824	435311
F7	4	297589	543050
F8	4	297496	533507
F9	4	302367	554150
F10	4	325198	593442
F11	4	454811	736002
F12	4	293253	575044
G1	4	293747	445534
G2	4	287476	452874
G3	4	531422	698216
G4	4	491251	632655
G5	4	319284	498995
G6	4	324196	483642
G7	4	293016	514940
G8	4	287301	495322
G9	4	309075	556107
G10	4	284711	453741
G11	4	421046	546703
G12	4	260063	8430.64
H1	4	272546	502787
H2	4	269668	471719
H3	4	493207	695994
H4	4
H5	4
H6	4
H7	4	337186	641392
H8	4	312733	568036
H9	4	328580	612599
H10	4
H11	4
H12	4
A1	5	202639	324734
A2	5	187465	288553
A3	5	321214	418705
A4	5	337779	443862
A5	5	200100	347420
A6	5	231477	366373
A7	5	232437	359732
A8	5	220357	392539
A9	5	248766	428768
A10	5	265934	441828
A11	5	420558	605346
A12	5	235894	432788
B1	5	189102	311720
B2	5	203692	335371
B3	5	323674	464049
B4	5	273479	412247
B5	5	176282	322190
B6	5	198414	9439.78
B7	5	205471	350695
B8	5	220379	380774
B9	5	221602	392596
B10	5	305673	473547
B11	5	445321	626454
B12	5	235994	433270
C1	5	231579	364864
C2	5	229095	370583
C3	5	340655	475114
C4	5	256215	395738
C5	5	205261	423310
C6	5	216731	371410
C7	5	228698	397097
C8	5	234924	406288
C9	5	238989	420641
C10	5	271683	488541
C11	5	382436	614363
C12	5	235295	477307
D1	5	260497	411912
D2	5	229582	375875
D3	5	369867	510521
D4	5	324875	448773
D5	5	251082	402095
D6	5	254805	382628
D7	5	250871	379809
D8	5	242695	408784
D9	5	249401	415081
D10	5	281645	478450
D11	5	400006	605801
D12	5	273133	486239
E1	5	295917	438554
E2	5	274338	408107
E3	5	420252	566592
E4	5	414558	573364
E5	5	268236	438203
E6	5	289168	465200
E7	5	262158	442509
E8	5	287738	491052
E9	5	276818	462795
E10	5	300248	533464
E11	5	432113	701685
E12	5	284424	543022
F1	5	262034	435930
F2	5	246839	414958
F3	5	440353	593345
F4	5	440492	548937
F5	5	314055	478488
F6	5	280951	435759
F7	5	298621	543764
F8	5	298993	534625
F9	5	303040	555104
F10	5	326348	594078
F11	5	456795	738245
F12	5	294191	574092
G1	5	293722	444751
G2	5	288381	453349
G3	5	533115	699713
G4	5	491550	634941
G5	5	321208	499631
G6	5	325402	483886
G7	5	293564	515479
G8	5	288366	496016
G9	5	309672	557021
G10	5	285163	454957
G11	5	422175	547679
G12	5	259608	8844.66
H1	5	272777	501410
H2	5	270233	471032
H3	5	495021	697567
H4	5
H5	5
H6	5
H7	5	337741	639733
H8	5	314054	569278
H9	5	329537	611859
H10	5
H11	5
H12	5
A1	6	203376	324201
A2	6	188129	288680
A3	6	322137	418990
A4	6	338249	444000
A5	6	200568	347754
A6	6	232466	366164
A7	6	233263	359798
A8	6	221018	393163
A9	6	249286	428795
A10	6	267048	441614
A11	6	421259	605853
A12	6	235790	431602
B1	6	188987	311413
B2	6	204444	335509
B3	6	324731	464093
B4	6	274300	412528
B5	6	176628	322031
B6	6	198396	9355.16
B7	6	206215	350737
B8	6	221077	380718
B9	6	222210	392497
B10	6	305639	474063
B11	6	446073	627759
B12	6	236279	433247
C1	6	232262	364086
C2	6	229954	369746
C3	6	341487	474634
C4	6	256887	395552
C5	6	205753	423461
C6	6	217432	371719
C7	6	229516	397095
C8	6	235510	406551
C9	6	239121	420597
C10	6	272819	488832
C11	6	383413	614263
C12	6	235301	477490
D1	6	261051	411632
D2	6	229958	376161
D3	6	371401	511436
D4	6	326210	448641
D5	6	251607	402150
D6	6	256017	382767
D7	6	250765	379510
D8	6	243546	409008
D9	6	250344	415363
D10	6	281623	478708
D11	6	401506	606022
D12	6	273634	486829
E1	6	296802	438670
E2	6	275400	408198
E3	6	421649	567778
E4	6	415889	573422
E5	6	268846	437505
E6	6	290103	465331
E7	6	262888	442401
E8	6	288792	492057
E9	6	277165	463364
E10	6	301171	534263
E11	6	432512	703171
E12	6	285171	542091
F1	6	262449	435646
F2	6	246675	415107
F3	6	441773	593121
F4	6	441592	549538
F5	6	314867	478852
F6	6	281401	436087
F7	6	300179	543974
F8	6	300354	534820
F9	6	305069	555830
F10	6	327664	595474
F11	6	458045	738784
F12	6	295026	574531
G1	6	294238	443464
G2	6	289027	454082
G3	6	535048	700555
G4	6	492790	636398
G5	6	321691	500198
G6	6	326034	484202
G7	6	294038	515873
G8	6	289870	496760
G9	6	310959	557384
G10	6	286143	454388
G11	6	423293	548761
G12	6	258943	8805.35
H1	6	273138	500057
H2	6	270611	470175
H3	6	495916	696410
H4	6
H5	6
H6	6
H7	6	338772	639368
H8	6	314603	569439
H9	6	330452	611875
H10	6
H11	6
H12	6
A1	7	203385	323508
A2	7	188748	288773
A3	7	322834	419556
A4	7	339023	444216
A5	7	201020	348067
A6	7	233402	366808
A7	7	234327	359366
A8	7	221860	392769
A9	7	250456	428366
A10	7	267304	441588
A11	7	422207	605627
A12	7	236849	430612
B1	7	189623	311436
B2	7	205196	335985
B3	7	325368	464603
B4	7	275686	412600
B5	7	177154	322222
B6	7	198009	9390.53
B7	7	207310	350831
B8	7	221648	380728
B9	7	223350	392718
B10	7	306795	474592
B11	7	446954	628180
B12	7	236384	433496
C1	7	232996	363527
C2	7	230070	370193
C3	7	343215	475482
C4	7	257369	395535
C5	7	206715	423359
C6	7	217737	371819
C7	7	230350	396781
C8	7	235912	406640
C9	7	240468	420118
C10	7	273685	489219
C11	7	384290	615487
C12	7	235910	477146
D1	7	261459	411699
D2	7	231151	376621
D3	7	372472	511325
D4	7	327263	449401
D5	7	252289	401901
D6	7	257219	383253
D7	7	251901	379901
D8	7	244530	409470
D9	7	251017	416501
D10	7	282796	479230
D11	7	402547	606735
D12	7	274900	486296
E1	7	296836	438312
E2	7	275882	408080
E3	7	422289	568116
E4	7	417447	573626
E5	7	269670	437552
E6	7	290435	466008
E7	7	263883	442791
E8	7	290285	492309
E9	7	278756	464346
E10	7	301941	534834
E11	7	434266	702855
E12	7	285112	543716
F1	7	262939	434836
F2	7	247665	415623
F3	7	443103	594291
F4	7	442210	550018
F5	7	316265	478701
F6	7	281843	435929
F7	7	300189	544294
F8	7	301596	535730
F9	7	306164	556296
F10	7	328134	595925
F11	7	459486	740212
F12	7	295526	573418
G1	7	294179	442476
G2	7	290083	454508
G3	7	537035	701322
G4	7	493021	635672
G5	7	322617	500058
G6	7	326215	484105
G7	7	295283	516576
G8	7	290393	496602
G9	7	311891	558412
G10	7	286167	455065
G11	7	424300	548929
G12	7	258931	8627.75
H1	7	273163	499130
H2	7	270992	469878
H3	7	496272	695038
H4	7
H5	7
H6	7
H7	7	339841	639253
H8	7	315746	570130
H9	7	331441	612140
H10	7
H11	7
H12	7
A1	8	204268	322847
A2	8	189374	288766
A3	8	324518	419566
A4	8	340027	443921
A5	8	201333	347255
A6	8	234256	366432
A7	8	235391	359845
A8	8	222039	392886
A9	8	250883	428709
A10	8	268543	442252
A11	8	423910	605808
A12	8	236442	430571
B1	8	189901	311129
B2	8	205654	336184
B3	8	325853	464746
B4	8	275857	412753
B5	8	177705	322461
B6	8	197849	9212.65
B7	8	208110	351229
B8	8	222524	381315
B9	8	223788	392507
B10	8	307129	474159
B11	8	447697	626948
B12	8	237593	433728
C1	8	233688	364080
C2	8	230579	369631
C3	8	344079	475335
C4	8	258321	395893
C5	8	207231	423375
C6	8	218809	371735
C7	8	231029	396539
C8	8	236645	406870
C9	8	241042	420576
C10	8	274353	489277
C11	8	385278	615672
C12	8	236282	477342
D1	8	262833	411166
D2	8	232268	376541
D3	8	374203	511640
D4	8	327749	448993
D5	8	252763	402474
D6	8	258351	384001
D7	8	252546	380265
D8	8	244801	409910
D9	8	252149	416557
D10	8	283324	479481
D11	8	403926	607276
D12	8	274938	486784
E1	8	297064	438576
E2	8	276848	408264
E3	8	423383	568865
E4	8	418026	573437
E5	8	270472	437622
E6	8	291252	465592
E7	8	264516	443174
E8	8	290500	492566
E9	8	279808	464517
E10	8	303018	534633
E11	8	435124	702585
E12	8	286502	542518
F1	8	264008	434735
F2	8	248521	415032
F3	8	444633	594328
F4	8	442904	550102
F5	8	317176	478736
F6	8	281775	435986
F7	8	301516	543918
F8	8	302724	535825
F9	8	306478	555864
F10	8	329139	596459
F11	8	461005	738390
F12	8	296211	573089
G1	8	295297	441531
G2	8	291292	454262
G3	8	538161	702024
G4	8	494099	637698
G5	8	323622	500342
G6	8	326899	484554
G7	8	295929	516668
G8	8	291014	497483
G9	8	313329	558211
G10	8	287016	455314
G11	8	425476	549102
G12	8	258118	8765.29
H1	8	272500	497816
H2	8	271301	468901
H3	8	497643	696471
H4	8
H5	8
H6	8
H7	8	340269	638104
H8	8	316543	571219
H9	8	332261	612052
H10	8
H11	8
H12	8
A1	9	204435	322191
A2	9	189170	289082
A3	9	324509	419944
A4	9	340012	443996
A5	9	202157	347786
A6	9	234830	366915
A7	9	235456	359499
A8	9	222487	392531
A9	9	251242	428488
A10	9	268961	441640
A11	9	424383	606539
A12	9	235991	429442
B1	9	189745	310594
B2	9	206958	336030
B3	9	326567	465087
B4	9	276133	413120
B5	9	178206	322226
B6	9	197760	9458
B7	9	208950	351162
B8	9	222858	381119
B9	9	224872	392359
B10	9	307635	474880
B11	9	447680	628608
B12	9	237887	433220
C1	9	234165	363844
C2	9	231438	370213
C3	9	344531	475639
C4	9	259485	396376
C5	9	207739	423657
C6	9	219108	371537
C7	9	231755	397108
C8	9	236839	406701
C9	9	241599	420732
C10	9	275475	490102
C11	9	386656	615981
C12	9	236274	477284
D1	9	263235	411082
D2	9	232470	376613
D3	9	374317	512229
D4	9	328657	449314
D5	9	253074	403331
D6	9	259288	383738
D7	9	252340	380550
D8	9	245381	410194
D9	9	252587	417186
D10	9	284863	480164
D11	9	404874	607700
D12	9	275773	486890
E1	9	297443	438930
E2	9	277396	409069
E3	9	423939	569007
E4	9	419606	573385
E5	9	270647	437118
E6	9	292150	465244
E7	9	265077	442352
E8	9	291277	492941
E9	9	280845	464356
E10	9	303935	535018
E11	9	436661	703106
E12	9	286633	542498
F1	9	264093	434043
F2	9	248529	415491
F3	9	445591	594532
F4	9	443620	550644
F5	9	316783	478789
F6	9	281988	435585
F7	9	302565	544283
F8	9	303705	536070
F9	9	307973	556550
F10	9	330322	596382
F11	9	462208	739654
F12	9	296444	573528
G1	9	294438	441349
G2	9	291803	454563
G3	9	539503	702523
G4	9	494514	636870
G5	9	324569	500731
G6	9	327597	483894
G7	9	297185	517082
G8	9	291991	497637
G9	9	313977	558776
G10	9	287255	455400
G11	9	426812	549668
G12	9	258263	8785.11
H1	9	272821	497332
H2	9	271686	469149
H3	9	498351	696665
H4	9
H5	9
H6	9
H7	9	340914	639183
H8	9	317508	571336
H9	9	333065	612399
H10	9
H11	9
H12	9
A1	10	204379	321941
A2	10	190104	288642
A3	10	324959	419893
A4	10	340258	443960
A5	10	202072	348114
A6	10	235145	366931
A7	10	236133	359962
A8	10	223154	392813
A9	10	252082	428217
A10	10	270157	442772
A11	10	425111	605995
A12	10	236852	428932
B1	10	190034	310435
B2	10	206937	336079
B3	10	327686	464967
B4	10	276489	413252
B5	10	178601	322843
B6	10	198029	9536.9
B7	10	209218	351574
B8	10	223413	381346
B9	10	225081	392716
B10	10	307928	474623
B11	10	448880	628265
B12	10	238288	433233
C1	10	234524	363359
C2	10	232532	369853
C3	10	345127	475922
C4	10	259265	396278
C5	10	208385	423538
C6	10	219541	371559
C7	10	232016	396743
C8	10	237637	406934
C9	10	241971	420605
C10	10	276086	490462
C11	10	387304	616902
C12	10	237115	477105
D1	10	263856	410922
D2	10	233103	376300
D3	10	376037	511985
D4	10	329141	449417
D5	10	253453	403025
D6	10	260177	383746
D7	10	252467	380369
D8	10	245710	410060
D9	10	253459	417316
D10	10	285268	479955
D11	10	405895	607301
D12	10	276921	486753
E1	10	297966	438104
E2	10	277962	408778
E3	10	425557	569612
E4	10	419876	573744
E5	10	271145	437197
E6	10	292970	465243
E7	10	266317	442739
E8	10	292184	492671
E9	10	281391	464649
E10	10	304834	535092
E11	10	437382	704505
E12	10	287128	542469
F1	10	264215	434378
F2	10	249240	415760
F3	10	445970	594488
F4	10	444884	551083
F5	10	317840	478973
F6	10	283108	435093
F7	10	303186	544659
F8	10	304951	536184
F9	10	308902	556914
F10	10	330846	597191
F11	10	462928	739445
F12	10	296973	573343
G1	10	295223	440931
G2	10	292824	454627
G3	10	541809	703172
G4	10	495437	637738
G5	10	324967	499866
G6	10	327805	484240
G7	10	297964	517186
G8	10	292670	498374
G9	10	315227	559235
G10	10	287294	455601
G11	10	427726	549377
G12	10	257715	8685.89
H1	10	272333	496273
H2	10	272153	468205
H3	10	499568	696010
H4	10
H5	10
H6	10
H7	10	341511	638994
H8	10	318296	570592
H9	10	333105	611921
H10	10
H11	10
H12	10
A1	11	204592	322068
A2	11	190242	288655
A3	11	325901	420117
A4	11	340673	444540
A5	11	202799	348161
A6	11	235711	367163
A7	11	236833	359964
A8	11	223261	392822
A9	11	252112	428524
A10	11	270208	442412
A11	11	426277	606553
A12	11	237163	428613
B1	11	189727	310865
B2	11	207232	336487
B3	11	328434	465272
B4	11	276708	413601
B5	11	178780	322711
B6	11	197717	9307.71
B7	11	209666	351302
B8	11	224034	381371
B9	11	225711	392835
B10	11	308466	474662
B11	11	449044	628451
B12	11	238429	433166
C1	11	235177	363329
C2	11	232638	369816
C3	11	345970	475859
C4	11	260187	396601
C5	11	208699	423222
C6	11	220085	372056
C7	11	232854	396830
C8	11	237776	406683
C9	11	242570	420020
C10	11	277197	490473
C11	11	387923	617210
C12	11	237938	477107
D1	11	264034	410523
D2	11	234167	376776
D3	11	376700	512700
D4	11	329043	449832
D5	11	254274	403207
D6	11	260620	383962
D7	11	252570	380532
D8	11	245441	409975
D9	11	253862	417136
D10	11	286007	480379
D11	11	407124	609777
D12	11	277877	487039
E1	11	297870	438428
E2	11	277953	409167
E3	11	425936	569579
E4	11	420991	573884
E5	11	271880	436759
E6	11	293254	465418
E7	11	266110	443121
E8	11	293147	493113
E9	11	281998	464328
E10	11	305408	534396
E11	11	438481	704146
E12	11	287087	542349
F1	11	265381	433984
F2	11	249943	415031
F3	11	446670	594115
F4	11	445276	550100
F5	11	318281	478390
F6	11	282735	435426
F7	11	303414	544462
F8	11	305397	536324
F9	11	309511	556743
F10	11	330970	596537
F11	11	464046	739709
F12	11	297368	571745
G1	11	295789	440263
G2	11	293127	454721
G3	11	541952	702914
G4	11	495421	639307
G5	11	325774	500469
G6	11	328227	484070
G7	11	298342	517170
G8	11	293036	498254
G9	11	315489	559167
G10	11	287672	455867
G11	11	428398	550493
G12	11	257145	8876.41
H1	11	272350	495422
H2	11	272903	468058
H3	11	499248	696619
H4	11
H5	11
H6	11
H7	11	341890	638576
H8	11	318885	572521
H9	11	334516	611469
H10	11
H11	11
H12	11
A1	12	205344	321116
A2	12	190342	288593
A3	12	326733	419930
A4	12	340834	444076
A5	12	203442	348248
A6	12	235926	366698
A7	12	237028	360028
A8	12	223743	392985
A9	12	252606	428234
A10	12	271232	442506
A11	12	427091	606704
A12	12	237708	427845
B1	12	190402	310505
B2	12	208191	336034
B3	12	328962	464943
B4	12	277461	413519
B5	12	179315	322528
B6	12	197553	9433.8
B7	12	210575	351326
B8	12	224357	380873
B9	12	226310	392752
B10	12	308750	474872
B11	12	449258	630292
B12	12	238839	432343
C1	12	235412	363499
C2	12	232859	369767
C3	12	347085	475647
C4	12	260339	397133
C5	12	209641	423528
C6	12	220668	371694
C7	12	233034	396503
C8	12	237968	406802
C9	12	242964	419824
C10	12	277703	490592
C11	12	388868	617076
C12	12	238056	477802
D1	12	264732	410588
D2	12	234766	376516
D3	12	377619	512244
D4	12	330357	449515
D5	12	254659	402715
D6	12	261298	383966
D7	12	252646	380376
D8	12	245923	410758
D9	12	254660	417381
D10	12	286322	480073
D11	12	407571	608869
D12	12	278162	486673
E1	12	298544	438550
E2	12	278603	408832
E3	12	426935	569774
E4	12	421826	573320
E5	12	272670	436748
E6	12	293467	465107
E7	12	266824	442906
E8	12	293335	492976
E9	12	283042	464354
E10	12	306065	534698
E11	12	439496	703674
E12	12	287979	540996
F1	12	265633	433385
F2	12	250705	415456
F3	12	447540	594407
F4	12	445530	550590
F5	12	318654	478420
F6	12	282850	435315
F7	12	304550	544121
F8	12	306167	536458
F9	12	310385	556670
F10	12	331574	597137
F11	12	465288	738259
F12	12	298524	572651
G1	12	295943	440009
G2	12	293700	454843
G3	12	543604	703430
G4	12	495214	637942
G5	12	325962	500479
G6	12	328558	484176
G7	12	298685	517337
G8	12	293587	498556
G9	12	316046	558997
G10	12	287485	455603
G11	12	429121	549823
G12	12	257392	8913.23
H1	12	272212	494681
H2	12	273520	468199
H3	12	500757	696837
H4	12
H5	12
H6	12
H7	12	342238	638761
H8	12	319442	571444
H9	12	335092	611881
H10	12
H11	12
H12	12
A1	13	206136	320399
A2	13	190774	288901
A3	13	327184	419893
A4	13	341006	444345
A5	13	203348	347998
A6	13	236248	366708
A7	13	237383	359947
A8	13	224348	392848
A9	13	252896	428551
A10	13	271268	442667
A11	13	428276	606649
A12	13	237812	427326
B1	13	189705	310391
B2	13	208598	336520
B3	13	329328	465615
B4	13	277713	413176
B5	13	179270	322794
B6	13	197708	9461.17
B7	13	210670	351493
B8	13	225070	381380
B9	13	226409	392251
B10	13	309227	475507
B11	13	450678	629226
B12	13	239734	433109
C1	13	235457	363365
C2	13	233243	369673
C3	13	347518	475641
C4	13	260521	396655
C5	13	209590	423316
C6	13	220815	372205
C7	13	233622	396389
C8	13	238259	406365
C9	13	243831	420435
C10	13	277724	491154
C11	13	389765	617423
C12	13	238446	477098
D1	13	264838	410970
D2	13	234633	376421
D3	13	377643	512511
D4	13	330415	450147
D5	13	255258	402740
D6	13	261852	384141
D7	13	253024	380507
D8	13	245965	410382
D9	13	254818	417646
D10	13	286899	480780
D11	13	408484	607618
D12	13	278377	487347
E1	13	298038	437933
E2	13	279232	409440
E3	13	427218	569447
E4	13	422592	573559
E5	13	273130	436335
E6	13	294386	464636
E7	13	267443	442864
E8	13	293971	493687
E9	13	282944	465011
E10	13	306493	534921
E11	13	440758	703227
E12	13	288836	541462
F1	13	266068	433538
F2	13	250909	414777
F3	13	447840	594313
F4	13	445571	550416
F5	13	318770	477732
F6	13	282742	434513
F7	13	305216	543981
F8	13	307164	536682
F9	13	311177	557071
F10	13	332195	597822
F11	13	465819	741843
F12	13	298234	572544
G1	13	295217	439730
G2	13	294396	455147
G3	13	543349	703015
G4	13	495439	639686
G5	13	326200	500228
G6	13	329192	484200
G7	13	299059	517792
G8	13	293619	498746
G9	13	316695	559213
G10	13	287714	455650
G11	13	428761	550614
G12	13	256821	8989.23
H1	13	272337	493897
H2	13	273978	468609
H3	13	501445	696044
H4	13
H5	13
H6	13
H7	13	343608	639684
H8	13	319973	572012
H9	13	335041	612729
H10	13
H11	13
H12	13
A1	14	205242	320490
A2	14	191188	288419
A3	14	326834	420290
A4	14	341792	444138
A5	14	203809	348403
A6	14	236275	367188
A7	14	237708	359464
A8	14	223994	393025
A9	14	253378	427690
A10	14	271740	442391
A11	14	429051	605978
A12	14	238676	427466
B1	14	190020	310077
B2	14	208814	336550
B3	14	330112	465121
B4	14	277748	413611
B5	14	179707	322661
B6	14	198116	9558.08
B7	14	210941	351522
B8	14	225477	381038
B9	14	226944	392714
B10	14	309068	474824
B11	14	450765	629487
B12	14	239769	433058
C1	14	235610	363432
C2	14	233781	369057
C3	14	347654	476094
C4	14	261267	396818
C5	14	209816	423405
C6	14	221230	372636
C7	14	234049	396701
C8	14	238626	406878
C9	14	243811	420197
C10	14	278242	490875
C11	14	389861	617364
C12	14	238572	476584
D1	14	265050	410443
D2	14	234807	377100
D3	14	378434	512406
D4	14	330757	449905
D5	14	254779	402953
D6	14	262593	384179
D7	14	252957	380834
D8	14	246169	410487
D9	14	255736	417397
D10	14	287401	480626
D11	14	409464	608406
D12	14	278716	487074
E1	14	298377	438239
E2	14	279193	409510
E3	14	427512	571236
E4	14	422592	573809
E5	14	273067	436031
E6	14	294457	464608
E7	14	267889	442979
E8	14	294480	493571
E9	14	283752	464412
E10	14	306943	534897
E11	14	441140	702292
E12	14	288760	540676
F1	14	265680	433600
F2	14	251876	415168
F3	14	448301	594455
F4	14	446533	550810
F5	14	319843	477827
F6	14	283189	435107
F7	14	304834	544753
F8	14	307779	536793
F9	14	311662	556895
F10	14	332823	598321
F11	14	466423	740546
F12	14	298090	572552
G1	14	295864	440040
G2	14	294294	455302
G3	14	544102	704135
G4	14	495152	638442
G5	14	326818	499857
G6	14	328740	484244
G7	14	299685	517948
G8	14	293708	498515
G9	14	317473	559987
G10	14	287952	455556
G11	14	430278	550277
G12	14	256978	8914.13
H1	14	271279	494028
H2	14	274025	468650
H3	14	500806	696437
H4	14
H5	14
H6	14
H7	14	343348	638898
H8	14	320430	571243
H9	14	335844	612041
H10	14
H11	14
H12	14
A1	15	205573	320224
A2	15	191619	288907
A3	15	327456	420256
A4	15	341721	444020
A5	15	203331	348305
A6	15	236654	366847
A7	15	238003	360031
A8	15	224692	392593
A9	15	253528	427805
A10	15	271800	442658
A11	15	428964	606560
A12	15	238034	426746
B1	15	189802	310518
B2	15	208378	336753
B3	15	330362	464882
B4	15	277802	414011
B5	15	179605	322951
B6	15	197316	9495.27
B7	15	211043	351394
B8	15	225678	381594
B9	15	227339	392388
B10	15	309239	475380
B11	15	450895	629826
B12	15	239472	432751
C1	15	236090	362830
C2	15	233711	369219
C3	15	348316	475235
C4	15	261117	396665
C5	15	210643	423148
C6	15	221211	372318
C7	15	234161	396581
C8	15	239097	406531
C9	15	244176	419916
C10	15	278355	491013
C11	15	390898	618322
C12	15	239253	476759
D1	15	265810	410401
D2	15	235247	376278
D3	15	378133	512259
D4	15	330673	449795
D5	15	254804	402937
D6	15	263014	384111
D7	15	253118	380967
D8	15	246311	411126
D9	15	255619	417712
D10	15	287337	480908
D11	15	410360	608232
D12	15	279287	487066
E1	15	298595	438892
E2	15	279666	409296
E3	15	427824	570629
E4	15	423053	572956
E5	15	273394	435880
E6	15	295132	464362
E7	15	267872	443261
E8	15	294607	493349
E9	15	284153	464854
E10	15	307386	534691
E11	15	441661	703763
E12	15	288934	542418
F1	15	266421	432712
F2	15	251231	415761
F3	15	448498	594584
F4	15	446516	551249
F5	15	319343	477663
F6	15	282683	435298
F7	15	305892	544067
F8	15	308037	536639
F9	15	311566	556304
F10	15	332787	598723
F11	15	467040	741007
F12	15	298707	572496
G1	15	295352	439570
G2	15	294991	455561
G3	15	544859	704470
G4	15	495366	639037
G5	15	327017	500430
G6	15	329487	483935
G7	15	300319	518355
G8	15	294294	498721
G9	15	318122	559628
G10	15	288507	455483
G11	15	430436	550263
G12	15	256165	8732.77
H1	15	271926	492672
H2	15	274189	467977
H3	15	501113	697063
H4	15
H5	15
H6	15
H7	15	343586	639771
H8	15	321024	570868
H9	15	336364	611752
H10	15
H11	15
H12	15
A1	16	206089	319137
A2	16	191868	288550
A3	16	328432	420433
A4	16	341738	444420
A5	16	204152	348071
A6	16	237174	366710
A7	16	238614	359963
A8	16	224642	392987
A9	16	253929	428565
A10	16	272518	442726
A11	16	429059	607284
A12	16	238722	426808
B1	16	190557	310246
B2	16	209315	336166
B3	16	330849	465437
B4	16	278308	413830
B5	16	179993	322781
B6	16	197551	9573.06
B7	16	211486	351334
B8	16	225608	381274
B9	16	227697	392060
B10	16	309742	475715
B11	16	451229	629136
B12	16	239905	433300
C1	16	236519	363218
C2	16	234392	369107
C3	16	349080	475450
C4	16	261010	396526
C5	16	210572	423369
C6	16	221639	371972
C7	16	234977	396120
C8	16	239295	406180
C9	16	244950	419670
C10	16	279472	490992
C11	16	391149	618033
C12	16	239381	477353
D1	16	266256	410579
D2	16	235759	376197
D3	16	379019	512218
D4	16	330982	450460
D5	16	255764	402162
D6	16	263447	384192
D7	16	253049	381031
D8	16	246223	410735
D9	16	256598	418359
D10	16	287751	480326
D11	16	410309	610315
D12	16	279689	487351
E1	16	298558	438495
E2	16	279727	409897
E3	16	428683	570509
E4	16	424020	573434
E5	16	274158	435503
E6	16	295355	464101
E7	16	268435	442867
E8	16	295328	493826
E9	16	284707	465188
E10	16	307763	534643
E11	16	442425	704066
E12	16	289571	541056
F1	16	266752	432518
F2	16	251994	415440
F3	16	449030	595047
F4	16	446422	551488
F5	16	319688	477787
F6	16	283044	434508
F7	16	306124	544267
F8	16	309083	537012
F9	16	313060	556661
F10	16	333190	598701
F11	16	468016	740891
F12	16	299391	572461
G1	16	296077	440394
G2	16	295308	454738
G3	16	545273	704257
G4	16	495425	637648
G5	16	327436	500437
G6	16	329442	483911
G7	16	300926	517548
G8	16	294994	498503
G9	16	318189	560066
G10	16	287825	456000
G11	16	430401	550349
G12	16	255601	8654.94
H1	16	271647	492275
H2	16	274135	467983
H3	16	501394	694813
H4	16
H5	16
H6	16
H7	16	344514	638816
H8	16	321845	571330
H9	16	337261	612338
H10	16
H11	16
H12	16
A1	17	206247	318883
A2	17	191801	288270
A3	17	328321	420558
A4	17	341646	443890
A5	17	204124	348189
A6	17	237584	367256
A7	17	238658	359670
A8	17	224886	392297
A9	17	254898	427223
A10	17	273084	442004
A11	17	430053	606171
A12	17	238391	425973
B1	17	190287	309979
B2	17	209474	335745
B3	17	331744	466077
B4	17	278821	413639
B5	17	180279	322445
B6	17	197628	9580.44
B7	17	211802	351223
B8	17	225775	381365
B9	17	228604	391989
B10	17	310054	475806
B11	17	451403	628492
B12	17	240189	432996
C1	17	236836	363099
C2	17	234715	369226
C3	17	348870	475426
C4	17	261979	396399
C5	17	211016	423564
C6	17	222025	372307
C7	17	235031	396170
C8	17	239407	406205
C9	17	244909	419386
C10	17	279218	491867
C11	17	391099	618676
C12	17	239809	476716
D1	17	266914	410880
D2	17	236332	376940
D3	17	380054	511954
D4	17	331648	450157
D5	17	255620	402925
D6	17	264177	385006
D7	17	253083	380680
D8	17	246220	410992
D9	17	256783	418275
D10	17	288531	481033
D11	17	410878	609996
D12	17	280455	487370
E1	17	297797	438283
E2	17	279888	409635
E3	17	429337	570287
E4	17	424092	573338
E5	17	274193	435384
E6	17	295726	464437
E7	17	268774	442927
E8	17	295607	494151
E9	17	285193	465621
E10	17	308361	534734
E11	17	443375	704455
E12	17	289734	540806
F1	17	266798	432502
F2	17	251696	414898
F3	17	449601	594547
F4	17	446687	550982
F5	17	319590	477521
F6	17	283149	434928
F7	17	307072	544090
F8	17	309421	537283
F9	17	313250	557203
F10	17	333839	598432
F11	17	468306	740617
F12	17	298909	571839
G1	17	296487	439575
G2	17	295048	454962
G3	17	545998	703946
G4	17	495036	638486
G5	17	328072	500596
G6	17	329624	483985
G7	17	301142	518291
G8	17	294595	498728
G9	17	318824	560057
G10	17	288131	456139
G11	17	431238	549815
G12	17	255995	8937.38
H1	17	270848	491869
H2	17	274437	468095
H3	17	502183	696369
H4	17
H5	17
H6	17
H7	17	344794	639370
H8	17	321958	571339
H9	17	336926	612200
H10	17
H11	17
H12	17
A1	18	206267	319037
A2	18	192128	288671
A3	18	328949	420595
A4	18	342183	444072
A5	18	204587	348317
A6	18	237809	367597
A7	18	239068	359785
A8	18	225233	392757
A9	18	255186	427789
A10	18	273715	442352
A11	18	430567	607189
A12	18	238862	425623
B1	18	190018	309671
B2	18	210301	336456
B3	18	331834	466026
B4	18	278548	414016
B5	18	180030	322972
B6	18	197103	9656.2
B7	18	212392	351000
B8	18	226344	381602
B9	18	228222	392146
B10	18	310612	476071
B11	18	451064	629410
B12	18	240391	432923
C1	18	237242	362500
C2	18	234401	368429
C3	18	349458	475502
C4	18	262190	396736
C5	18	211328	423512
C6	18	222306	372664
C7	18	235310	396527
C8	18	239278	406106
C9	18	245073	419613
C10	18	279720	492124
C11	18	391080	618376
C12	18	239799	476890
D1	18	266952	410770
D2	18	236177	376142
D3	18	379815	512087
D4	18	331597	450437
D5	18	255906	403241
D6	18	264514	384593
D7	18	253141	381248
D8	18	246469	410820
D9	18	257352	418146
D10	18	288978	480682
D11	18	411297	609057
D12	18	280230	487197
E1	18	298787	438185
E2	18	280211	409812
E3	18	429399	570973
E4	18	424889	572744
E5	18	274753	435432
E6	18	296249	463855
E7	18	269318	443339
E8	18	296775	494227
E9	18	285782	465611
E10	18	308933	534911
E11	18	444164	703926
E12	18	290322	540324
F1	18	267302	432141
F2	18	251907	415438
F3	18	449750	594540
F4	18	447072	551371
F5	18	320771	477426
F6	18	282972	434884
F7	18	307555	544335
F8	18	310006	537097
F9	18	314146	556270
F10	18	334200	598900
F11	18	468989	740518
F12	18	299669	572610
G1	18	296515	440153
G2	18	295469	455306
G3	18	546820	704520
G4	18	495649	639632
G5	18	327834	500463
G6	18	330093	483516
G7	18	301110	518932
G8	18	294973	498887
G9	18	319393	559863
G10	18	288472	455794
G11	18	431468	550429
G12	18	255905	8907.7
H1	18	270771	490844
H2	18	274378	468399
H3	18	501727	696123
H4	18
H5	18
H6	18
H7	18	344795	637896
H8	18	322640	570658
H9	18	337833	612095
H10	18
H11	18
H12	18
A1	19	206306	318814
A2	19	192320	288396
A3	19	329332	420466
A4	19	341883	444063
A5	19	204554	348351
A6	19	237729	367183
A7	19	239282	360204
A8	19	225582	392752
A9	19	255597	427574
A10	19	273586	442607
A11	19	430924	607418
A12	19	239858	424968
B1	19	189629	309400
B2	19	210268	336208
B3	19	332246	465722
B4	19	279082	413834
B5	19	180686	322723
B6	19	197697	9222.37
B7	19	212517	351275
B8	19	226523	381730
B9	19	228775	391665
B10	19	310476	476221
B11	19	452108	629501
B12	19	240442	433362
C1	19	236476	362411
C2	19	234922	368423
C3	19	349497	475548
C4	19	262073	396957
C5	19	211739	423215
C6	19	222294	372215
C7	19	235870	396189
C8	19	240072	406434
C9	19	245808	419302
C10	19	280460	491396
C11	19	392966	618673
C12	19	239785	476928
D1	19	265990	410020
D2	19	236614	375810
D3	19	380346	511858
D4	19	331486	450229
D5	19	255608	402720
D6	19	264838	385215
D7	19	253335	381354
D8	19	246386	410970
D9	19	257664	418421
D10	19	288816	481049
D11	19	412086	609649
D12	19	280443	487336
E1	19	298915	438332
E2	19	280509	409652
E3	19	429538	571388
E4	19	424832	572565
E5	19	274967	434937
E6	19	296117	464436
E7	19	269260	443049
E8	19	297057	494014
E9	19	286307	465541
E10	19	309262	534579
E11	19	444591	703778
E12	19	290181	540699
F1	19	267678	432265
F2	19	252681	414896
F3	19	449791	594060
F4	19	446422	551415
F5	19	320748	477148
F6	19	283375	434902
F7	19	307708	543911
F8	19	310444	536964
F9	19	314461	557335
F10	19	334129	599605
F11	19	469068	739597
F12	19	299981	572392
G1	19	295738	439261
G2	19	296123	455699
G3	19	546098	704708
G4	19	495182	639662
G5	19	328263	500645
G6	19	329977	484451
G7	19	301266	518471
G8	19	295035	498912
G9	19	318916	559838
G10	19	288315	455740
G11	19	431717	550701
G12	19	255490	8734.07
H1	19	271012	490761
H2	19	274331	467987
H3	19	502010	696642
H4	19
H5	19
H6	19
H7	19	345119	638184
H8	19	322529	572139
H9	19	338006	612298
H10	19
H11	19
H12	19
A1	20	207146	318294
A2	20	192985	288476
A3	20	329012	420591
A4	20	342090	443794
A5	20	204668	348283
A6	20	237959	367324
A7	20	239430	360143
A8	20	225483	392328
A9	20	255665	427714
A10	20	273601	442703
A11	20	431853	606266
A12	20	239340	424944
B1	20	189267	309431
B2	20	210103	336370
B3	20	332854	465749
B4	20	278896	413890
B5	20	180779	323262
B6	20	197515	9514.13
B7	20	213022	351241
B8	20	226440	381535
B9	20	228822	391509
B10	20	310658	476576
B11	20	452248	629703
B12	20	240552	433703
C1	20	237028	362600
C2	20	235061	368239
C3	20	349910	475809
C4	20	262376	396850
C5	20	211400	423690
C6	20	222310	372630
C7	20	236028	395695
C8	20	239886	406090
C9	20	246217	419729
C10	20	280173	492077
C11	20	392506	618956
C12	20	240397	477094
D1	20	267018	410034
D2	20	237228	376444
D3	20	380146	512075
D4	20	331976	450488
D5	20	255971	402992
D6	20	265163	384879
D7	20	252886	381166
D8	20	246587	410987
D9	20	258103	417982
D10	20	289665	480998
D11	20	412346	608910
D12	20	280810	487397
E1	20	298854	438131
E2	20	280410	409263
E3	20	428832	571548
E4	20	425318	572582
E5	20	274844	434583
E6	20	295967	463557
E7	20	269855	443693
E8	20	297263	494354
E9	20	287069	465025
E10	20	309489	534546
E11	20	445070	703155
E12	20	290651	540550
F1	20	267963	432331
F2	20	252113	414906
F3	20	449724	594775
F4	20	447226	550953
F5	20	320628	477536
F6	20	282683	434736
F7	20	308604	543819
F8	20	311743	536997
F9	20	315200	556255
F10	20	334426	599364
F11	20	469793	740293
F12	20	299832	571829
G1	20	295955	439643
G2	20	296778	455370
G3	20	546465	705874
G4	20	495361	638776
G5	20	327980	500324
G6	20	329732	483795
G7	20	301607	518781
G8	20	295165	498665
G9	20	320209	560134
G10	20	288435	455620
G11	20	432898	550234
G12	20	255404	8827.7
H1	20	269920	489635
H2	20	274440	468193
H3	20	501867	695077
H4	20
H5	20
H6	20
H7	20	345323	639286
H8	20	323444	571751
H9	20	337545	611900
H10	20
H11	20
H12	20
A1	21	206786	318210
A2	21	192850	288480
A3	21	329402	421061
A4	21	341785	443670
A5	21	204659	348415
A6	21	238018	367268
A7	21	240220	359992
A8	21	226142	392457
A9	21	256057	427572
A10	21	274524	442486
A11	21	431701	607159
A12	21	239275	424408
B1	21	189287	309212
B2	21	210776	336623
B3	21	332704	465732
B4	21	278382	413949
B5	21	180506	323001
B6	21	197457	9517.32
B7	21	213165	351500
B8	21	226799	381438
B9	21	229833	391822
B10	21	310776	476480
B11	21	452457	629052
B12	21	240904	432770
C1	21	237320	362119
C2	21	235608	368489
C3	21	350364	475273
C4	21	262294	396995
C5	21	211557	423092
C6	21	222487	372632
C7	21	236591	395792
C8	21	240812	405989
C9	21	246683	419480
C10	21	280592	491934
C11	21	392612	618974
C12	21	240905	476894
D1	21	266772	409694
D2	21	236564	376537
D3	21	380692	512312
D4	21	331397	450492
D5	21	255695	403182
D6	21	265453	385627
D7	21	253261	381090
D8	21	246614	411251
D9	21	258612	418264
D10	21	289655	481378
D11	21	412046	609126
D12	21	281008	487390
E1	21	298435	438780
E2	21	280560	409240
E3	21	429281	571837
E4	21	425934	572687
E5	21	274784	434223
E6	21	296471	464131
E7	21	270699	443402
E8	21	297628	494096
E9	21	288058	465703
E10	21	310400	534565
E11	21	445186	704225
E12	21	291142	540122
F1	21	267443	432523
F2	21	252599	415082
F3	21	449949	594400
F4	21	447212	551349
F5	21	321086	477562
F6	21	282828	434604
F7	21	309227	543886
F8	21	312279	537280
F9	21	316021	556593
F10	21	335075	600232
F11	21	470593	739853
F12	21	300537	571492
G1	21	296177	439517
[truncated: 10,967 more rows]

## Sheet: Amplification Data
Block Type	96alum
Chemistry	SYBR_GREEN
Experiment File Name	D:\HAIFENG\118Untitled.eds
Experiment Run End Time	2021-08-28 18:15:02 PM CST
Instrument Type	sds7500
Passive Reference	ROX
Well	Cycle	Target Name	Rn	ΔRn
A1	1	CBF4	0.62054	-0.0049006
A1	2	CBF4	0.618088	-0.00841045
A1	3	CBF4	0.619153	-0.00840422
A1	4	CBF4	0.621353	-0.0072621
A1	5	CBF4	0.624016	-0.00565769
A1	6	CBF4	0.627316	-0.00341563
A1	7	CBF4	0.628685	-0.00310452
A1	8	CBF4	0.632711	-0.000137664
A1	9	CBF4	0.634516	0.000609991
A1	10	CBF4	0.634833	-0.000131816
A1	11	CBF4	0.635246	-0.000776466
A1	12	CBF4	0.63947	0.00238857
A1	13	CBF4	0.643372	0.00523252
A1	14	CBF4	0.6404	0.00120281
A1	15	CBF4	0.641966	0.00171013
A1	16	CBF4	0.64577	0.00445609
A1	17	CBF4	0.646778	0.00440546
A1	18	CBF4	0.646531	0.00309992
A1	19	CBF4	0.647103	0.00261459
A1	20	CBF4	0.6508	0.00525296
A1	21	CBF4	0.64984	0.00323484
A1	22	CBF4	0.651186	0.00352199
A1	23	CBF4	0.651974	0.00325231
A1	24	CBF4	0.653436	0.00365629
A1	25	CBF4	0.653243	0.00240492
A1	26	CBF4	0.654645	0.00274822
A1	27	CBF4	0.656088	0.00313306
A1	28	CBF4	0.656689	0.00267634
A1	29	CBF4	0.656722	0.0016507
A1	30	CBF4	0.655097	-0.00103261
A1	31	CBF4	0.654037	-0.00315051
A1	32	CBF4	0.657785	-0.000461475
A1	33	CBF4	0.65683	-0.00247447
A1	34	CBF4	0.658726	-0.00163639
A1	35	CBF4	0.658508	-0.00291309
A1	36	CBF4	0.659481	-0.00299835
A1	37	CBF4	0.659439	-0.00409862
A1	38	CBF4	0.660697	-0.00389814
A1	39	CBF4	0.659956	-0.00569793
A1	40	CBF4	0.658474	-0.00823819
A2	1	CBF4	0.643039	-0.00668675
A2	2	CBF4	0.641828	-0.00872961
A2	3	CBF4	0.645645	-0.00574458
A2	4	CBF4	0.646452	-0.00576934
A2	5	CBF4	0.649674	-0.00338005
A2	6	CBF4	0.651686	-0.00219985
A2	7	CBF4	0.65362	-0.0010976
A2	8	CBF4	0.655803	0.00025325
A2	9	CBF4	0.654381	-0.00200055
A2	10	CBF4	0.658616	0.0014022
A2	11	CBF4	0.659062	0.00101701
A2	12	CBF4	0.659552	0.000674431
A2	13	CBF4	0.660344	0.000635245
A2	14	CBF4	0.662882	0.00234087
A2	15	CBF4	0.663256	0.00188302
A2	16	CBF4	0.664939	0.00273397
A2	17	CBF4	0.665351	0.00231385
A2	18	CBF4	0.665561	0.00169214
A2	19	CBF4	0.666861	0.00216031
A2	20	CBF4	0.66898	0.00344697
A2	21	CBF4	0.668504	0.00213964
A2	22	CBF4	0.672173	0.00497631
A2	23	CBF4	0.670181	0.00215234
A2	24	CBF4	0.671867	0.00300698
A2	25	CBF4	0.670825	0.00113275
A2	26	CBF4	0.673147	0.00262326
A2	27	CBF4	0.673148	0.00179204
A2	28	CBF4	0.672046	-0.000142093
A2	29	CBF4	0.671976	-0.00104394
A2	30	CBF4	0.672043	-0.00180887
A2	31	CBF4	0.675001	0.000317261
A2	32	CBF4	0.675105	-0.000410538
A2	33	CBF4	0.677216	0.000867836
A2	34	CBF4	0.674508	-0.00267199
A2	35	CBF4	0.676361	-0.00165069
A2	36	CBF4	0.676521	-0.0023224
A2	37	CBF4	0.678642	-0.00103324
A2	38	CBF4	0.676734	-0.00377323
A2	39	CBF4	0.676827	-0.00451271
A2	40	CBF4	0.676662	-0.00550939
A3	1	CBF4	0.76398	-0.00542355
A3	2	CBF4	0.764873	-0.00507842
A3	3	CBF4	0.763673	-0.00682642
A3	4	CBF4	0.76678	-0.00426793
A3	5	CBF4	0.767161	-0.00443504
A3	6	CBF4	0.768841	-0.00330325
A3	7	CBF4	0.769466	-0.00322676
A3	8	CBF4	0.773462	0.000221095
A3	9	CBF4	0.772744	-0.00104524
A3	10	CBF4	0.773909	-0.000428077
A3	11	CBF4	0.775739	0.000853205
A3	12	CBF4	0.778064	0.00263046
A3	13	CBF4	0.779208	0.00322575
A3	14	CBF4	0.777639	0.00110861
A3	15	CBF4	0.779183	0.00210433
A3	16	CBF4	0.781176	0.00354875
A3	17	CBF4	0.780679	0.0025039
A3	18	CBF4	0.782105	0.00338202
A3	19	CBF4	0.783256	0.00398464
A3	20	CBF4	0.782262	0.00244203
A3	21	CBF4	0.782313	0.00194513
A3	22	CBF4	0.783227	0.002311
A3	23	CBF4	0.783037	0.0015727
A3	24	CBF4	0.785218	0.00320553
A3	25	CBF4	0.784402	0.0018412
A3	26	CBF4	0.784922	0.00181285
A3	27	CBF4	0.784859	0.00120204
A3	28	CBF4	0.78471	0.000504749
A3	29	CBF4	0.78699	0.00223676
A3	30	CBF4	0.785777	0.00047475
A3	31	CBF4	0.785952	0.000101705
A3	32	CBF4	0.785752	-0.000645955
A3	33	CBF4	0.786744	-0.000202416
A3	34	CBF4	0.786278	-0.00121645
A3	35	CBF4	0.784699	-0.00334372
A3	36	CBF4	0.786521	-0.00207024
A3	37	CBF4	0.786749	-0.00239018
A3	38	CBF4	0.785832	-0.00385608
A3	39	CBF4	0.78428	-0.00595545
A3	40	CBF4	0.785744	-0.0050405
A4	1	CBF4	0.757052	-0.00677526
A4	2	CBF4	0.757434	-0.00660815
A4	3	CBF4	0.759264	-0.00499341
A4	4	CBF4	0.759556	-0.00491612
A4	5	CBF4	0.761	-0.00368763
A4	6	CBF4	0.761821	-0.00308129
A4	7	CBF4	0.763194	-0.00192265
A4	8	CBF4	0.765963	0.000631454
A4	9	CBF4	0.765799	0.000252173
A4	10	CBF4	0.766417	0.00065574
A4	11	CBF4	0.766348	0.000371708
A4	12	CBF4	0.767514	0.0013225
A4	13	CBF4	0.767435	0.00102876
A4	14	CBF4	0.769562	0.00294074
A4	15	CBF4	0.769605	0.0027693
A4	16	CBF4	0.768953	0.00190174
A4	17	CBF4	0.769663	0.00239733
A4	18	CBF4	0.770557	0.00307663
A4	19	CBF4	0.769898	0.00220216
A4	20	CBF4	0.770831	0.00292043
A4	21	CBF4	0.770359	0.002233
A4	22	CBF4	0.769812	0.00147177
A4	23	CBF4	0.769118	0.000562366
A4	24	CBF4	0.770222	0.00145219
A4	25	CBF4	0.769518	0.000533008
A4	26	CBF4	0.7707	0.00150026
A4	27	CBF4	0.770935	0.00152003
A4	28	CBF4	0.770456	0.000825857
A4	29	CBF4	0.770418	0.000573295
A4	30	CBF4	0.769964	-9.59022e-05
A4	31	CBF4	0.770562	0.000287935
A4	32	CBF4	0.769608	-0.000881584
A4	33	CBF4	0.769573	-0.0011311
A4	34	CBF4	0.770473	-0.000446025
A4	35	CBF4	0.768371	-0.00276287
A4	36	CBF4	0.770118	-0.00123057
A4	37	CBF4	0.769065	-0.00249892
A4	38	CBF4	0.77004	-0.00173886
A4	39	CBF4	0.76795	-0.00404343
A4	40	CBF4	0.766873	-0.00533513
A5	1	CBF4	0.567537	-0.0106502
A5	2	CBF4	0.569739	-0.00877806
A5	3	CBF4	0.571646	-0.0072011
A5	4	CBF4	0.573834	-0.00534299
A5	5	CBF4	0.575962	-0.00354454
A5	6	CBF4	0.576754	-0.00308214
A5	7	CBF4	0.577533	-0.00263302
A5	8	CBF4	0.579784	-0.000712027
A5	9	CBF4	0.58127	0.000443463
A5	10	CBF4	0.580475	-0.000680804
A5	11	CBF4	0.582486	0.000999684
A5	12	CBF4	0.584189	0.00237267
A5	13	CBF4	0.584337	0.00219135
A5	14	CBF4	0.584982	0.00250648
A5	15	CBF4	0.583774	0.000968551
A5	16	CBF4	0.586523	0.00338742
A5	17	CBF4	0.586245	0.00277987
A5	18	CBF4	0.587358	0.00356229
A5	19	CBF4	0.587208	0.00308247
A5	20	CBF4	0.587649	0.0031941
A5	21	CBF4	0.587399	0.00261409
A5	22	CBF4	0.588306	0.00319106
A5	23	CBF4	0.587334	0.00188929
A5	24	CBF4	0.588336	0.00256108
A5	25	CBF4	0.587505	0.00139968
A5	26	CBF4	0.587926	0.00149069
A5	27	CBF4	0.588696	0.00193081
A5	28	CBF4	0.587939	0.000844034
A5	29	CBF4	0.587946	0.000521449
A5	30	CBF4	0.589079	0.0013242
A5	31	CBF4	0.588498	0.000413436
A5	32	CBF4	0.587357	-0.00105714
A5	33	CBF4	0.586856	-0.00188868
A5	34	CBF4	0.587616	-0.00145781
A5	35	CBF4	0.587509	-0.00189549
A5	36	CBF4	0.587266	-0.00246818
A5	37	CBF4	0.586094	-0.00397028
A5	38	CBF4	0.587617	-0.00277723
A5	39	CBF4	0.585767	-0.00495674
A5	40	CBF4	0.586358	-0.00469544
A6	1	CBF4	0.620911	-0.0147905
A6	2	CBF4	0.62498	-0.0111833
A6	3	CBF4	0.628048	-0.00857789
A6	4	CBF4	0.629719	-0.00736861
A6	5	CBF4	0.631806	-0.00574311
A6	6	CBF4	0.634868	-0.00314314
A6	7	CBF4	0.636307	-0.00216638
A6	8	CBF4	0.639291	0.000355329
A6	9	CBF4	0.640013	0.000615462
A6	10	CBF4	0.640843	0.000983121
A6	11	CBF4	0.64198	0.00165864
A6	12	CBF4	0.64338	0.00259594
A6	13	CBF4	0.644239	0.00299358
A6	14	CBF4	0.643471	0.0017633
A6	15	CBF4	0.645102	0.00293198
A6	16	CBF4	0.646761	0.00412862
A6	17	CBF4	0.646918	0.00382424
A6	18	CBF4	0.646928	0.00337222
A6	19	CBF4	0.64744	0.00342188
A6	20	CBF4	0.647819	0.00333899
A6	21	CBF4	0.648077	0.00313474
A6	22	CBF4	0.647803	0.00239858
A6	23	CBF4	0.647838	0.00197165
A6	24	CBF4	0.647762	0.00143404
A6	25	CBF4	0.648317	0.00152644
A6	26	CBF4	0.64904	0.00178789
A6	27	CBF4	0.647911	0.000196638
A6	28	CBF4	0.650115	0.00193866
A6	29	CBF4	0.649312	0.000673272
A6	30	CBF4	0.649492	0.000391121
A6	31	CBF4	0.65028	0.000717891
A6	32	CBF4	0.650938	0.000913233
A6	33	CBF4	0.648309	-0.00217719
A6	34	CBF4	0.649102	-0.0018469
A6	35	CBF4	0.648217	-0.0031933
A6	36	CBF4	0.648756	-0.0031168
A6	37	CBF4	0.649496	-0.00283855
A6	38	CBF4	0.648378	-0.00441865
A6	39	CBF4	0.648782	-0.00447693
A6	40	CBF4	0.648527	-0.00519366
A7	1	CBF5	0.632975	-0.00945062
A7	2	CBF5	0.638319	-0.00542008
A7	3	CBF5	0.640045	-0.00500748
A7	4	CBF5	0.64432	-0.00204679
A7	5	CBF5	0.646138	-0.00154138
A7	6	CBF5	0.648318	-0.000675609
A7	7	CBF5	0.652058	0.00175097
A7	8	CBF5	0.654145	0.00252466
A7	9	CBF5	0.654956	0.00202256
A7	10	CBF5	0.655992	0.0017453
A7	11	CBF5	0.657935	0.0023745
A7	12	CBF5	0.658361	0.00148754
A7	13	CBF5	0.659495	0.00130731
A7	14	CBF5	0.661284	0.00178315
A7	15	CBF5	0.661063	0.000249003
A7	16	CBF5	0.662884	0.000756493
A7	17	CBF5	0.663548	0.000106521
A7	18	CBF5	0.664475	-0.000279701
A7	19	CBF5	0.664297	-0.00177087
A7	20	CBF5	0.664818	-0.002563
A7	21	CBF5	0.667292	-0.00140231
A7	22	CBF5	0.668457	-0.00155071
A7	23	CBF5	0.672051	0.000729843
A7	24	CBF5	0.677518	0.00488257
A7	25	CBF5	0.69076	0.0168114
A7	26	CBF5	0.713405	0.0381428
A7	27	CBF5	0.757324	0.0807482
A7	28	CBF5	0.838649	0.16076
A7	29	CBF5	0.979314	0.300112
A7	30	CBF5	1.20664	0.526126
A7	31	CBF5	1.53251	0.850681
A7	32	CBF5	1.91355	1.23041
A7	33	CBF5	2.29206	1.60761
A7	34	CBF5	2.60316	1.91739
A7	35	CBF5	2.82611	2.13903
A7	36	CBF5	2.98421	2.29581
A7	37	CBF5	3.11964	2.42993
A7	38	CBF5	3.21285	2.52183
A7	39	CBF5	3.28828	2.59594
A7	40	CBF5	3.35513	2.66148
A8	1	CBF5	0.55514	-0.0024517
A8	2	CBF5	0.557703	-0.00087515
A8	3	CBF5	0.557508	-0.00205747
A8	4	CBF5	0.558527	-0.0020248
A8	5	CBF5	0.561363	-0.000175324
A8	6	CBF5	0.562153	-0.000371778
A8	7	CBF5	0.564861	0.00135008
A8	8	CBF5	0.565148	0.000650566
A8	9	CBF5	0.5668	0.00131605
A8	10	CBF5	0.568093	0.00162201
A8	11	CBF5	0.568352	0.000894297
A8	12	CBF5	0.569341	0.000897399
A8	13	CBF5	0.571081	0.00165116
A8	14	CBF5	0.569923	-0.000493708
A8	15	CBF5	0.572329	0.000925421
A8	16	CBF5	0.571627	-0.000762758
A8	17	CBF5	0.573256	-0.000120575
A8	18	CBF5	0.573466	-0.000896864
A8	19	CBF5	0.574361	-0.000988473
A8	20	CBF5	0.574731	-0.00160496
A8	21	CBF5	0.57622	-0.00110196
A8	22	CBF5	0.57798	-0.00032894
A8	23	CBF5	0.580916	0.00162061
A8	24	CBF5	0.584913	0.00463118
A8	25	CBF5	0.595077	0.0138088
A8	26	CBF5	0.615914	0.0336593
A8	27	CBF5	0.651903	0.0686616
A8	28	CBF5	0.720952	0.136724
A8	29	CBF5	0.84393	0.258716
A8	30	CBF5	1.04803	0.461825
A8	31	CBF5	1.35194	0.764749
A8	32	CBF5	1.72836	1.14019
A8	33	CBF5	2.11795	1.52879
A8	34	CBF5	2.45927	1.86912
A8	35	CBF5	2.69949	2.10836
A8	36	CBF5	2.88368	2.29156
A8	37	CBF5	3.01791	2.42481
A8	38	CBF5	3.1287	2.53461
A8	39	CBF5	3.21648	2.6214
A8	40	CBF5	3.28056	2.68449
A9	1	CBF5	0.571896	-0.00401917
A9	2	CBF5	0.574741	-0.00239743
A9	3	CBF5	0.577	-0.00136136
A9	4	CBF5	0.579205	-0.000378765
A9	5	CBF5	0.580187	-0.000620623
A9	6	CBF5	0.581364	-0.000666621
A9	7	CBF5	0.584677	0.00142373
A9	8	CBF5	0.585206	0.000729355
A9	9	CBF5	0.586345	0.000645866
A9	10	CBF5	0.588678	0.00175536
A9	11	CBF5	0.588328	0.000181938
A9	12	CBF5	0.589879	0.00050996
A9	13	CBF5	0.590119	-0.00047332
A9	14	CBF5	0.592432	0.000617521
A9	15	CBF5	0.592625	-0.000413383
A9	16	CBF5	0.592509	-0.00175197
A9	17	CBF5	0.596641	0.00115664
A9	18	CBF5	0.596523	-0.00018433
A9	19	CBF5	0.597785	-0.000145391
A9	20	CBF5	0.597747	-0.00140613
A9	21	CBF5	0.598863	-0.00151382
A9	22	CBF5	0.601708	0.000108637
A9	23	CBF5	0.604609	0.0017867
A9	24	CBF5	0.612356	0.00830991
A9	25	CBF5	0.623614	0.0183451
A9	26	CBF5	0.647817	0.0413251
A9	27	CBF5	0.690533	0.0828183
A9	28	CBF5	0.773506	0.164568
A9	29	CBF5	0.916009	0.305848
A9	30	CBF5	1.15372	0.542338
A9	31	CBF5	1.49388	0.881275
A9	32	CBF5	1.91564	1.30181
A9	33	CBF5	2.34089	1.72584
A9	34	CBF5	2.69511	2.07884
A9	35	CBF5	2.9569	2.3394
A9	36	CBF5	3.1519	2.53318
A9	37	CBF5	3.29433	2.67439
A9	38	CBF5	3.40795	2.78678
A9	39	CBF5	3.49085	2.86846
A9	40	CBF5	3.56313	2.93951
A10	1	CBF5	0.594339	-0.00394735
A10	2	CBF5	0.598036	-0.00140972
A10	3	CBF5	0.598346	-0.00225818
A10	4	CBF5	0.600229	-0.00153367
A10	5	CBF5	0.601894	-0.00102761
A10	6	CBF5	0.60471	0.000628515
A10	7	CBF5	0.605326	8.57699e-05
A10	8	CBF5	0.607217	0.000817908
A10	9	CBF5	0.609006	0.001448
A10	10	CBF5	0.610149	0.00143264
A10	11	CBF5	0.610762	0.000885902
A10	12	CBF5	0.612945	0.00191046
A10	13	CBF5	0.612803	0.000609604
A10	14	CBF5	0.614253	0.000900548
A10	15	CBF5	0.614017	-0.000494841
A10	16	CBF5	0.615546	-0.000124503
A10	17	CBF5	0.617831	0.00100144
A10	18	CBF5	0.618772	0.000783365
A10	19	CBF5	0.618124	-0.00102306
A10	20	CBF5	0.618023	-0.00228279
A10	21	CBF5	0.620413	-0.0010523
A10	22	CBF5	0.620426	-0.00219764
A10	23	CBF5	0.622734	-0.00104917
A10	24	CBF5	0.6239	-0.00104164
A10	25	CBF5	0.629682	0.00358125
A10	26	CBF5	0.637684	0.0104244
A10	27	CBF5	0.652465	0.0240466
A10	28	CBF5	0.682881	0.0533035
A10	29	CBF5	0.735151	0.104415
A10	30	CBF5	0.834479	0.202583
A10	31	CBF5	1.00452	0.371462
A10	32	CBF5	1.26511	0.6309
A10	33	CBF5	1.61296	0.977583
A10	34	CBF5	1.99154	1.35501
A10	35	CBF5	2.34538	1.70769
A10	36	CBF5	2.62375	1.9849
A10	37	CBF5	2.83222	2.19221
A10	38	CBF5	2.98465	2.34349
A10	39	CBF5	3.11038	2.46806
A10	40	CBF5	3.20781	2.56432
A11	1	CBF5	0.68891	-0.00188056
A11	2	CBF5	0.687833	-0.00405845
A11	3	CBF5	0.690778	-0.00221446
A11	4	CBF5	0.692905	-0.00118741
A11	5	CBF5	0.694739	-0.00045433
A11	6	CBF5	0.695315	-0.000979624
A11	7	CBF5	0.697139	-0.000256022
A11	8	CBF5	0.699744	0.00124769
A11	9	CBF5	0.699681	8.34895e-05
A11	10	CBF5	0.701508	0.000810012
A11	11	CBF5	0.702786	0.000987517
A11	12	CBF5	0.703953	0.00105302
A11	13	CBF5	0.70597	0.00196986
A11	14	CBF5	0.708031	0.00292938
A11	15	CBF5	0.707207	0.00100517
A11	16	CBF5	0.706521	-0.000781958
A11	17	CBF5	0.709458	0.0010547
A11	18	CBF5	0.709116	-0.000388861
A11	19	CBF5	0.709436	-0.00116944
A11	20	CBF5	0.712317	0.000610772
A11	21	CBF5	0.711019	-0.00178855
A11	22	CBF5	0.712197	-0.00171112
A11	23	CBF5	0.713113	-0.00189536
A11	24	CBF5	0.71531	-0.000799765
A11	25	CBF5	0.719086	0.00187529
A11	26	CBF5	0.723777	0.00546594
A11	27	CBF5	0.735515	0.0161025
A11	28	CBF5	0.754791	0.0342782
A11	29	CBF5	0.793427	0.0718135
A11	30	CBF5	0.865129	0.142414
A11	31	CBF5	0.989651	0.265836
A11	32	CBF5	1.18856	0.463641
A11	33	CBF5	1.47558	0.74956
A11	34	CBF5	1.82399	1.09688
A11	35	CBF5	2.16963	1.44141
A11	36	CBF5	2.45976	1.73044
A11	37	CBF5	2.68395	1.95353
A11	38	CBF5	2.85011	2.11859
A11	39	CBF5	2.98183	2.24921
A11	40	CBF5	3.07876	2.34504
A12	1	CBF5	0.542169	0.00217985
A12	2	CBF5	0.539098	-0.00218375
A12	3	CBF5	0.541542	-0.00103213
A12	4	CBF5	0.542227	-0.00163891
A12	5	CBF5	0.545057	-0.000101289
A12	6	CBF5	0.546315	-0.00013616
A12	7	CBF5	0.550029	0.00228629
A12	8	CBF5	0.549135	9.97508e-05
A12	9	CBF5	0.549529	-0.000798732
A12	10	CBF5	0.55219	0.000569729
A12	11	CBF5	0.553327	0.000414397
A12	12	CBF5	0.555595	0.0013906
A12	13	CBF5	0.556512	0.0010155
A12	14	CBF5	0.558351	0.00156196
A12	15	CBF5	0.557788	-0.000293597
A12	16	CBF5	0.55932	-5.36308e-05
A12	17	CBF5	0.55964	-0.00102608
A12	18	CBF5	0.561206	-0.000752619
A12	19	CBF5	0.564415	0.00116462
A12	20	CBF5	0.563227	-0.00131559
A12	21	CBF5	0.563787	-0.00204831
A12	22	CBF5	0.565743	-0.00138396
A12	23	CBF5	0.567543	-0.000876489
A12	24	CBF5	0.57017	0.000458533
A12	25	CBF5	0.5735	0.00249612
A12	26	CBF5	0.582433	0.0101366
A12	27	CBF5	0.598871	0.0252823
A12	28	CBF5	0.62743	0.0525493
A12	29	CBF5	0.681661	0.105487
A12	30	CBF5	0.779667	0.202202
A12	31	CBF5	0.948954	0.370196
A12	32	CBF5	1.21295	0.632896
A12	33	CBF5	1.56619	0.984847
A12	34	CBF5	1.96181	1.37917
A12	35	CBF5	2.3207	1.73678
A12	36	CBF5	2.60159	2.01637
A12	37	CBF5	2.81826	2.23175
A12	38	CBF5	2.98081	2.39301
A12	39	CBF5	3.11288	2.52379
A12	40	CBF5	3.21547	2.62509
B1	1	CBF4	0.603053	-0.00803026
B1	2	CBF4	0.604222	-0.00680346
B1	3	CBF4	0.605793	-0.00517552
B1	4	CBF4	0.606849	-0.00406221
B1	5	CBF4	0.60664	-0.00421454
B1	6	CBF4	0.606869	-0.00392801
B1	7	CBF4	0.608869	-0.00187163
B1	8	CBF4	0.61036	-0.000322902
B1	9	CBF4	0.61091	0.000284248
B1	10	CBF4	0.612153	0.00158394
B1	11	CBF4	0.61032	-0.000192256
B1	12	CBF4	0.613201	0.00274633
B1	13	CBF4	0.611181	0.000783864
B1	14	CBF4	0.612816	0.00247564
B1	15	CBF4	0.611245	0.000961581
B1	16	CBF4	0.614213	0.00398665
B1	17	CBF4	0.613869	0.00370033
B1	18	CBF4	0.61361	0.00349823
B1	19	CBF4	0.612894	0.00283961
B1	20	CBF4	0.611663	0.00166476
B1	21	CBF4	0.61216	0.00221964
B1	22	CBF4	0.609531	-0.000352281
B1	23	CBF4	0.611264	0.00143772
B1	24	CBF4	0.610929	0.00115957
B1	25	CBF4	0.611931	0.00221852
B1	26	CBF4	0.610912	0.00125694
B1	27	CBF4	0.610971	0.00137282
B1	28	CBF4	0.611742	0.00220129
B1	29	CBF4	0.609823	0.000339732
B1	30	CBF4	0.609644	0.000217679
B1	31	CBF4	0.607605	-0.00176428
B1	32	CBF4	0.606556	-0.00275632
B1	33	CBF4	0.608315	-0.000940208
B1	34	CBF4	0.609042	-0.000156151
B1	35	CBF4	0.60715	-0.00199112
B1	36	CBF4	0.606644	-0.00243939
B1	37	CBF4	0.607714	-0.00131279
B1	38	CBF4	0.606655	-0.00231502
B1	39	CBF4	0.605758	-0.00315448
B1	40	CBF4	0.605389	-0.00346649
B2	1	CBF4	0.600057	-0.00849417
B2	2	CBF4	0.602899	-0.0064036
B2	3	CBF4	0.604552	-0.00550286
B2	4	CBF4	0.606156	-0.00465112
B2	5	CBF4	0.607364	-0.00419557
B2	6	CBF4	0.609356	-0.00295592
B2	7	CBF4	0.610729	-0.00233521
B2	8	CBF4	0.61173	-0.0020863
B2	9	CBF4	0.615891	0.00132212
B2	10	CBF4	0.615738	0.000416419
B2	11	CBF4	0.615868	-0.000205622
B2	12	CBF4	0.619554	0.00272793
B2	13	CBF4	0.619869	0.00229132
B2	14	CBF4	0.620454	0.00212376
B2	15	CBF4	0.618785	-0.000297385
B2	16	CBF4	0.622653	0.00281778
B2	17	CBF4	0.623909	0.00332209
B2	18	CBF4	0.625047	0.00370773
B2	19	CBF4	0.625409	0.00331743
B2	20	CBF4	0.624619	0.00177479
B2	21	CBF4	0.626147	0.00255078
B2	22	CBF4	0.626442	0.00209354
B2	23	CBF4	0.627309	0.0022081
B2	24	CBF4	0.627099	0.00124607
B2	25	CBF4	0.62852	0.00191453
B2	26	CBF4	0.629126	0.00176795
B2	27	CBF4	0.628256	0.000146042
B2	28	CBF4	0.630609	0.00174636
B2	29	CBF4	0.6317	0.00208568
B2	30	CBF4	0.631091	0.000724482
B2	31	CBF4	0.631191	7.19823e-05
B2	32	CBF4	0.632086	0.000214609
B2	33	CBF4	0.632027	-0.000596499
B2	34	CBF4	0.630989	-0.00238673
B2	35	CBF4	0.633133	-0.000994912
B2	36	CBF4	0.632595	-0.002285
B2	37	CBF4	0.632323	-0.00330949
B2	38	CBF4	0.633117	-0.00326832
B2	39	CBF4	0.631617	-0.00552054
B2	40	CBF4	0.631471	-0.00641873
B3	1	CBF4	0.691443	-0.00769954
B3	2	CBF4	0.694224	-0.00553238
B3	3	CBF4	0.695499	-0.00487149
B3	4	CBF4	0.696851	-0.00413264
B3	5	CBF4	0.6975	-0.00409784
B3	6	CBF4	0.699712	-0.0025002
B3	7	CBF4	0.700314	-0.00251183
B3	8	CBF4	0.701143	-0.0022969
B3	9	CBF4	0.702164	-0.00188974
B3	10	CBF4	0.704752	8.48323e-05
B3	11	CBF4	0.705895	0.000613997
B3	12	CBF4	0.707531	0.00163555
B3	13	CBF4	0.707296	0.00078666
B3	14	CBF4	0.709733	0.00260936
B3	15	CBF4	0.710635	0.00289796
B3	16	CBF4	0.710836	0.00248478
B3	17	CBF4	0.711781	0.00281582
B3	18	CBF4	0.712051	0.00247231
B3	19	CBF4	0.713399	0.00320568
B3	20	CBF4	0.714665	0.00385793
B3	21	CBF4	0.714367	0.00294609
B3	22	CBF4	0.714307	0.00227237
B3	23	CBF4	0.715756	0.00310755
B3	24	CBF4	0.714897	0.00163423
B3	25	CBF4	0.717581	0.00370477
B3	26	CBF4	0.715981	0.00149034
B3	27	CBF4	0.71666	0.0015553
B3	28	CBF4	0.716378	0.000659914
B3	29	CBF4	0.717182	0.000850166
B3	30	CBF4	0.717783	0.000836988
B3	31	CBF4	0.717392	-0.000168191
B3	32	CBF4	0.71562	-0.00255399
B3	33	CBF4	0.718198	-0.000589905
B3	34	CBF4	0.717945	-0.00145698
B3	35	CBF4	0.717697	-0.00231875
B3	36	CBF4	0.718518	-0.00211199
B3	37	CBF4	0.717785	-0.00345894
B3	38	CBF4	0.717984	-0.00387343
B3	39	CBF4	0.718782	-0.0036898
B3	40	CBF4	0.717315	-0.00577084
B4	1	CBF4	0.661516	-0.00599531
B4	2	CBF4	0.662587	-0.00510385
B4	3	CBF4	0.663453	-0.00441821
B4	4	CBF4	0.663826	-0.00422472
B4	5	CBF4	0.663385	-0.00484608
B4	6	CBF4	0.664925	-0.0034866
B4	7	CBF4	0.668168	-0.000423329
B4	8	CBF4	0.668335	-0.000436488
B4	9	CBF4	0.66841	-0.000541319
B4	10	CBF4	0.669057	-7.47795e-05
B4	11	CBF4	0.669022	-0.000289104
B4	12	CBF4	0.670975	0.00148313
B4	13	CBF4	0.672143	0.00247115
B4	14	CBF4	0.671519	0.00166782
B4	15	CBF4	0.671	0.000968549
B4	16	CBF4	0.672517	0.00230579
B4	17	CBF4	0.674068	0.00367618
B4	18	CBF4	0.672795	0.00222309
B4	19	CBF4	0.674381	0.00362935
B4	20	CBF4	0.673841	0.00290917
B4	21	CBF4	0.672504	0.00139158
B4	22	CBF4	0.673079	0.00178666
B4	23	CBF4	0.673762	0.0022895
B4	24	CBF4	0.673671	0.00201908
B4	25	CBF4	0.673245	0.0014125
B4	26	CBF4	0.673212	0.0011999
B4	27	CBF4	0.673122	0.00092985
B4	28	CBF4	0.674126	0.00175372
B4	29	CBF4	0.673147	0.00059472
B4	30	CBF4	0.672264	-0.000467958
B4	31	CBF4	0.673676	0.000763548
B4	32	CBF4	0.672558	-0.000534151
B4	33	CBF4	0.672853	-0.000419399
B4	34	CBF4	0.672676	-0.000776536
B4	35	CBF4	0.672065	-0.00156783
B4	36	CBF4	0.671807	-0.00200544
B4	37	CBF4	0.670182	-0.00381121
B4	38	CBF4	0.67085	-0.00332315
B4	39	CBF4	0.670524	-0.003829
B4	40	CBF4	0.670585	-0.00394802
B5	1	CBF4	0.539248	-0.0065894
B5	2	CBF4	0.54178	-0.0047433
B5	3	CBF4	0.543501	-0.00370758
B5	4	CBF4	0.544905	-0.00298979
B5	5	CBF4	0.547137	-0.00144314
B5	6	CBF4	0.548483	-0.000783105
B5	7	CBF4	0.549787	-0.000165393
B5	8	CBF4	0.551091	0.000453392
B5	9	CBF4	0.553048	0.00172425
B5	10	CBF4	0.553212	0.00120304
B5	11	CBF4	0.553993	0.00129778
B5	12	CBF4	0.555968	0.0025867
B5	13	CBF4	0.55537	0.00130297
B5	14	CBF4	0.556954	0.00220118
B5	15	CBF4	0.556137	0.000698454
B5	16	CBF4	0.557631	0.00150696
B5	17	CBF4	0.5591	0.00229008
B5	18	CBF4	0.557418	-7.79869e-05
B5	19	CBF4	0.55988	0.0016985
B5	20	CBF4	0.559234	0.00036708
B5	21	CBF4	0.558842	-0.000711138
B5	22	CBF4	0.560665	0.000426267
B5	23	CBF4	0.55985	-0.00107407
B5	24	CBF4	0.559705	-0.00190565
B5	25	CBF4	0.560885	-0.00141072
B5	26	CBF4	0.561421	-0.00156066
B5	27	CBF4	0.563206	-0.000461278
B5	28	CBF4	0.562187	-0.00216612
B5	29	CBF4	0.56319	-0.00184876
B5	30	CBF4	0.565997	0.000272186
B5	31	CBF4	0.568687	0.00227654
B5	32	CBF4	0.575471	0.00837478
B5	33	CBF4	0.58926	0.0214782
B5	34	CBF4	0.613502	0.0450336
B5	35	CBF4	0.661802	0.0926485
B5	36	CBF4	0.749757	0.179918
B5	37	CBF4	0.902088	0.331562
B5	38	CBF4	1.1384	0.567192
B5	39	CBF4	1.43227	0.860372
B5	40	CBF4	1.69764	1.12506
B6	1	CBF4	21.3079	0.115948
B6	2	CBF4	21.131	-0.0371855
B6	3	CBF4	21.0594	-0.0851116
B6	4	CBF4	20.9821	-0.138722
B6	5	CBF4	21.0189	-0.0781578
B6	6	CBF4	21.2071	0.133813
B6	7	CBF4	21.086	0.0364144
B6	8	CBF4	21.4758	0.449956
B6	9	CBF4	20.9092	-0.0928984
B6	10	CBF4	20.7645	-0.213924
B6	11	CBF4	21.2422	0.287562
B6	12	CBF4	20.941	0.0100044
B6	13	CBF4	20.8968	-0.0104006
B6	14	CBF4	20.7275	-0.155956
B6	15	CBF4	20.7804	-0.0793611
B6	16	CBF4	20.6361	-0.199934
B6	17	CBF4	20.6282	-0.184086
B6	18	CBF4	20.4121	-0.376496
B6	19	CBF4	21.4367	0.671794
B6	20	CBF4	20.7602	0.0190515
B6	21	CBF4	20.7471	0.0297382
B6	22	CBF4	20.7918	0.098147
B6	23	CBF4	20.6686	-0.00134044
B6	24	CBF4	20.627	-0.019222
B6	25	CBF4	20.3672	-0.255302
B6	26	CBF4	20.8442	0.245436
B6	27	CBF4	20.5524	-0.0226786
B6	28	CBF4	20.853	0.301649
B6	29	CBF4	20.4967	-0.0308768
B6	30	CBF4	20.7199	0.215995
B6	31	CBF4	19.894	-0.586156
B6	32	CBF4	20.4231	-0.0332672
B6	33	CBF4	20.3812	-0.0514863
B6	34	CBF4	20.4526	0.0436539
B6	35	CBF4	20.0492	-0.336057
B6	36	CBF4	20.3478	-0.0137461
B6	37	CBF4	20.6691	0.331358
B6	38	CBF4	20.4047	0.0906084
B6	39	CBF4	20.2664	-0.0239052
B6	40	CBF4	20.4638	0.197225
B7	1	CBF5	0.573767	-0.00811166
B7	2	CBF5	0.577542	-0.00567937
B7	3	CBF5	0.581646	-0.00291818
B7	4	CBF5	0.583584	-0.00232285
B7	5	CBF5	0.585896	-0.00135326
B7	6	CBF5	0.587948	-0.000644796
B7	7	CBF5	0.590912	0.000976333
B7	8	CBF5	0.59252	0.00124241
B7	9	CBF5	0.595025	0.0024044
B7	10	CBF5	0.595091	0.00112714
B7	11	CBF5	0.596824	0.00151725
B7	12	CBF5	0.599373	0.00272407
B7	13	CBF5	0.599358	0.00136574
B7	14	CBF5	0.600079	0.000743884
B7	15	CBF5	0.600588	-8.9864e-05
B7	16	CBF5	0.601952	-6.85241e-05
B7	17	CBF5	0.603042	-0.000321962
B7	18	CBF5	0.605108	0.000401223
B7	19	CBF5	0.604986	-0.00106273
B7	20	CBF5	0.606485	-0.000906739
B7	21	CBF5	0.606444	-0.00229052
B7	22	CBF5	0.609476	-0.000601679
B7	23	CBF5	0.611499	7.86495e-05
B7	24	CBF5	0.618198	0.00543508
B7	25	CBF5	0.629188	0.0150823
B7	26	CBF5	0.649584	0.0341354
B7	27	CBF5	0.688172	0.0713804
B7	28	CBF5	0.760076	0.141942
B7	29	CBF5	0.884936	0.265458
B7	30	CBF5	1.08323	0.462408
B7	31	CBF5	1.35441	0.732248
B7	32	CBF5	1.66739	1.04389
B7	33	CBF5	1.96279	1.33794
B7	34	CBF5	2.1976	1.57141
B7	35	CBF5	2.36388	1.73635
B7	36	CBF5	2.49843	1.86955
B7	37	CBF5	2.60009	1.96987
B7	38	CBF5	2.681	2.04943
B7	39	CBF5	2.74311	2.11021
B7	40	CBF5	2.79412	2.15987
B8	1	CBF5	0.571564	-0.00402505
B8	2	CBF5	0.574307	-0.00233831
B8	3	CBF5	0.575409	-0.00229243
B8	4	CBF5	0.577124	-0.00163304
B8	5	CBF5	0.578764	-0.00104893
B8	6	CBF5	0.580685	-0.000184733
B8	7	CBF5	0.582169	0.00024363
B8	8	CBF5	0.58357	0.00058819
B8	9	CBF5	0.584747	0.00070965
B8	10	CBF5	0.585854	0.000760239
B8	11	CBF5	0.587445	0.00129518
B8	12	CBF5	0.589059	0.00185342
B8	13	CBF5	0.590145	0.00188333
B8	14	CBF5	0.591745	0.00242726
B8	15	CBF5	0.59141	0.00103608
B8	16	CBF5	0.591723	0.000293208
B8	17	CBF5	0.592017	-0.00046921
B8	18	CBF5	0.593141	-0.000401633
B8	19	CBF5	0.593411	-0.00118748
B8	20	CBF5	0.593498	-0.00215696
B8	21	CBF5	0.594588	-0.00212234
B8	22	CBF5	0.597465	-0.000302212
B8	23	CBF5	0.599532	0.000708787
B8	24	CBF5	0.605912	0.00603355
B8	25	CBF5	0.616899	0.0159637
B8	26	CBF5	0.637308	0.035317
B8	27	CBF5	0.675474	0.072427
B8	28	CBF5	0.74848	0.144377
B8	29	CBF5	0.873029	0.26787
B8	30	CBF5	1.07163	0.465413
B8	31	CBF5	1.3539	0.746629
B8	32	CBF5	1.68662	1.07829
B8	33	CBF5	2.01036	1.40098
B8	34	CBF5	2.27291	1.66247
B8	35	CBF5	2.45976	1.84826
B8	36	CBF5	2.61284	2.00029
B8	37	CBF5	2.73295	2.11934
B8	38	CBF5	2.82376	2.20909
B8	39	CBF5	2.89163	2.27591
B8	40	CBF5	2.95981	2.34304
B9	1	CBF5	0.559816	-0.000330312
B9	2	CBF5	0.560857	-0.000648722
B9	3	CBF5	0.561538	-0.00132703
B9	4	CBF5	0.563186	-0.00103759
B9	5	CBF5	0.564454	-0.0011295
B9	6	CBF5	0.566144	-0.000797984
B9	7	CBF5	0.56873	0.000428081
B9	8	CBF5	0.57015	0.00048959
B9	9	CBF5	0.573128	0.00210767
B9	10	CBF5	0.57314	0.000760726
B9	11	CBF5	0.57457	0.000831414
B9	12	CBF5	0.576216	0.00111865
B9	13	CBF5	0.577203	0.000746054
B9	14	CBF5	0.577887	7.11481e-05
B9	15	CBF5	0.579372	0.000196375
B9	16	CBF5	0.58077	0.000235532
B9	17	CBF5	0.58319	0.00129613
B9	18	CBF5	0.581984	-0.00126949
B9	19	CBF5	0.584108	-0.000503991
B9	20	CBF5	0.584462	-0.00150917
B9	21	CBF5	0.586574	-0.0007569
B9	22	CBF5	0.588277	-0.000413282
B9	23	CBF5	0.590513	0.000463559
B9	24	CBF5	0.597544	0.00613559
B9	25	CBF5	0.609901	0.0171328
B9	26	CBF5	0.632403	0.0382763
B9	27	CBF5	0.677908	0.0824218
B9	28	CBF5	0.756694	0.159848
B9	29	CBF5	0.895567	0.297362
B9	30	CBF5	1.11658	0.517018
B9	31	CBF5	1.41966	0.818733
B9	32	CBF5	1.77731	1.17503
B9	33	CBF5	2.11112	1.50748
B9	34	CBF5	2.38624	1.78124
B9	35	CBF5	2.58029	1.97393
B9	36	CBF5	2.73254	2.12482
B9	37	CBF5	2.85151	2.24243
B9	38	CBF5	2.94898	2.33854
B9	39	CBF5	3.02513	2.41333
B9	40	CBF5	3.08643	2.47328
B10	1	CBF5	0.636199	-0.00724212
B10	2	CBF5	0.640068	-0.00385946
B10	3	CBF5	0.642189	-0.00222494
B10	4	CBF5	0.643409	-0.00149116
B10	5	CBF5	0.645497	0.000111472
B10	6	CBF5	0.644723	-0.00114865
B10	7	CBF5	0.646438	8.02045e-05
B10	8	CBF5	0.647734	0.000890274
B10	9	CBF5	0.647817	0.000486912
B10	10	CBF5	0.648784	0.000967546
B10	11	CBF5	0.649865	0.00156298
B10	12	CBF5	0.650176	0.00138713
B10	13	CBF5	0.650309	0.00103425
B10	14	CBF5	0.65091	0.00114969
B10	15	CBF5	0.650509	0.000262396
B10	16	CBF5	0.651108	0.00037515
B10	17	CBF5	0.651639	0.000419956
B10	18	CBF5	0.652449	0.00074383
B10	19	CBF5	0.651959	-0.000232154
B10	20	CBF5	0.651854	-0.000822794
B10	21	CBF5	0.652234	-0.000929325
B10	22	CBF5	0.652271	-0.00137864
B10	23	CBF5	0.653007	-0.00112886
B10	24	CBF5	0.653549	-0.00107273
B10	25	CBF5	0.654193	-0.00091503
B10	26	CBF5	0.657466	0.00187248
B10	27	CBF5	0.663999	0.00791912
B10	28	CBF5	0.677241	0.0206747
B10	29	CBF5	0.700794	0.0437423
B10	30	CBF5	0.744504	0.0869661
B10	31	CBF5	0.824552	0.166528
B10	32	CBF5	0.956284	0.297774
B10	33	CBF5	1.1421	0.483104
B10	34	CBF5	1.37513	0.715648
B10	35	CBF5	1.61172	0.951751
B10	36	CBF5	1.81577	1.15532
B10	37	CBF5	1.98586	1.32492
B10	38	CBF5	2.12136	1.45993
B10	39	CBF5	2.22666	1.56475
B10	40	CBF5	2.31581	1.65341
B11	1	CBF5	0.709582	0.000373335
B11	2	CBF5	0.711194	0.00149558
B11	3	CBF5	0.710413	0.000225471
B11	4	CBF5	0.711102	0.000425631
B11	5	CBF5	0.710861	-0.000305233
B11	6	CBF5	0.71058	-0.00107538
B11	7	CBF5	0.711507	-0.000637216
B11	8	CBF5	0.714089	0.00145563
B11	9	CBF5	0.712177	-0.00094631
B11	10	CBF5	0.714476	0.000864427
B11	11	CBF5	0.714525	0.000423598
B11	12	CBF5	0.712777	-0.00181318
B11	13	CBF5	0.716242	0.00116229
B11	14	CBF5	0.716084	0.000515234
B11	15	CBF5	0.715904	-0.000153821
B11	16	CBF5	0.71722	0.000672724
B11	17	CBF5	0.718233	0.001196
B11	18	CBF5	0.716647	-0.000879067
B11	19	CBF5	0.718201	0.000185539
B11	20	CBF5	0.718192	-0.000312212
B11	21	CBF5	0.719269	0.00027514
B11	22	CBF5	0.717999	-0.00148331
B11	23	CBF5	0.718847	-0.00112502
B11	24	CBF5	0.720104	-0.000357481
B11	25	CBF5	0.720674	-0.000276828
B11	26	CBF5	0.723403	0.00196336
B11	27	CBF5	0.728843	0.00691377
B11	28	CBF5	0.740744	0.0183261
B11	29	CBF5	0.761255	0.038348
B11	30	CBF5	0.797647	0.0742501
B11	31	CBF5	0.864369	0.140483
B11	32	CBF5	0.981412	0.257037
B11	33	CBF5	1.16202	0.437153
B11	34	CBF5	1.40127	0.675921
B11	35	CBF5	1.66549	0.939652
B11	36	CBF5	1.91431	1.18798
B11	37	CBF5	2.12099	1.39417
B11	38	CBF5	2.28007	1.55276
B11	39	CBF5	2.41174	1.68394
B11	40	CBF5	2.51317	1.78488
B12	1	CBF5	0.541121	-0.000365943
B12	2	CBF5	0.543086	0.000791666
B12	3	CBF5	0.54106	-0.00204161
B12	4	CBF5	0.542194	-0.00171513
B12	5	CBF5	0.54468	-3.62785e-05
B12	6	CBF5	0.545367	-0.000156533
B12	7	CBF5	0.545296	-0.00103526
B12	8	CBF5	0.547794	0.000655039
B12	9	CBF5	0.549114	0.00116838
B12	10	CBF5	0.550023	0.00127004
B12	11	CBF5	0.550434	0.000873156
B12	12	CBF5	0.552429	0.00206081
B12	13	CBF5	0.553518	0.00234241
B12	14	CBF5	0.553666	0.00168273
B12	15	CBF5	0.553372	0.000581681
B12	16	CBF5	0.553669	7.13733e-05
B12	17	CBF5	0.554713	0.00030827
B12	18	CBF5	0.555274	6.11765e-05
B12	19	CBF5	0.55483	-0.00119008
B12	20	CBF5	0.554646	-0.00218068
B12	21	CBF5	0.556656	-0.000978961
B12	22	CBF5	0.556666	-0.00177597
B12	23	CBF5	0.556149	-0.00310053
B12	24	CBF5	0.557467	-0.00258922
B12	25	CBF5	0.562067	0.00120316
B12	26	CBF5	0.566193	0.00452203
B12	27	CBF5	0.574438	0.0119593
B12	28	CBF5	0.591637	0.0283511
B12	29	CBF5	0.62644	0.0623465
B12	30	CBF5	0.68695	0.122049
B12	31	CBF5	0.796216	0.230508
B12	32	CBF5	0.973381	0.406865
B12	33	CBF5	1.22744	0.660118
B12	34	CBF5	1.53456	0.966428
B12	35	CBF5	1.8395	1.27057
B12	36	CBF5	2.09754	1.52779
B12	37	CBF5	2.31084	1.74029
B12	38	CBF5	2.47843	1.90707
B12	39	CBF5	2.61155	2.03938
B12	40	CBF5	2.71453	2.14156
C1	1	CBF4	0.626216	-0.011029
C1	2	CBF4	0.629507	-0.00850269
C1	3	CBF4	0.630945	-0.00782967
C1	4	CBF4	0.634179	-0.00535999
C1	5	CBF4	0.6347	-0.0056037
C1	6	CBF4	0.637933	-0.00313539
C1	7	CBF4	0.640932	-0.000901148
C1	8	CBF4	0.641859	-0.000738586
C1	9	CBF4	0.643584	0.00022238
C1	10	CBF4	0.645433	0.00130601
C1	11	CBF4	0.647283	0.00239209
C1	12	CBF4	0.647626	0.00197041
C1	13	CBF4	0.64799	0.00157018
C1	14	CBF4	0.648293	0.00110797
C1	15	CBF4	0.65069	0.00274008
C1	16	CBF4	0.651177	0.0024627
C1	17	CBF4	0.652262	0.00278345
C1	18	CBF4	0.65446	0.00421703
C1	19	CBF4	0.652508	0.00150068
C1	20	CBF4	0.65369	0.00191746
C1	21	CBF4	0.655366	0.00282895
C1	22	CBF4	0.657226	0.00392415
C1	23	CBF4	0.657627	0.003561
C1	24	CBF4	0.655829	0.000998079
C1	25	CBF4	0.655661	6.55247e-05
C1	26	CBF4	0.658942	0.00258217
C1	27	CBF4	0.658487	0.00136214
C1	28	CBF4	0.660043	0.00215407
C1	29	CBF4	0.660679	0.00202576
C1	30	CBF4	0.659405	-1.34701e-05
C1	31	CBF4	0.660828	0.000645241
C1	32	CBF4	0.660712	-0.000235934
C1	33	CBF4	0.66016	-0.00155252
C1	34	CBF4	0.661014	-0.0014625
C1	35	CBF4	0.660496	-0.00274499
C1	36	CBF4	0.661541	-0.00246465
C1	37	CBF4	0.662401	-0.0023692
C1	38	CBF4	0.660825	-0.0047098
C1	39	CBF4	0.661084	-0.005216
C1	40	CBF4	0.66228	-0.00478462
C2	1	CBF4	0.614	-0.00638119
C2	2	CBF4	0.612815	-0.00832126
C2	3	CBF4	0.616287	-0.00560347
C2	4	CBF4	0.617145	-0.0055006
C2	5	CBF4	0.618202	-0.00519793
C2	6	CBF4	0.621925	-0.00222926
C2	7	CBF4	0.621487	-0.00342219
C2	8	CBF4	0.623809	-0.00185447
C2	9	CBF4	0.625148	-0.00126975
C2	10	CBF4	0.628714	0.00154114
C2	11	CBF4	0.629064	0.0011369
C2	12	CBF4	0.629746	0.00106454
C2	13	CBF4	0.630945	0.00150865
C2	14	CBF4	0.633456	0.00326585
C2	15	CBF4	0.632988	0.00204265
C2	16	CBF4	0.635025	0.00332504
C2	17	CBF4	0.635693	0.00323849
C2	18	CBF4	0.636218	0.00300889
C2	19	CBF4	0.637643	0.00367986
C2	20	CBF4	0.638339	0.00362091
C2	21	CBF4	0.63939	0.00391762
C2	22	CBF4	0.638388	0.00216107
C2	23	CBF4	0.639419	0.00243727
C2	24	CBF4	0.639903	0.00216708
C2	25	CBF4	0.640021	0.00153038
C2	26	CBF4	0.641235	0.00199041
C2	27	CBF4	0.641297	0.00129732
C2	28	CBF4	0.641654	0.000899402
C2	29	CBF4	0.644162	0.00265309
C2	30	CBF4	0.641118	-0.00114546
C2	31	CBF4	0.643416	0.000398299
C2	32	CBF4	0.643815	4.3113e-05
C2	33	CBF4	0.642748	-0.00177906
C2	34	CBF4	0.643618	-0.00166319
C2	35	CBF4	0.642881	-0.00315474
C2	36	CBF4	0.64403	-0.0027601
C2	37	CBF4	0.644501	-0.00304442
C2	38	CBF4	0.644213	-0.00408673
C2	39	CBF4	0.644837	-0.00421661
C2	40	CBF4	0.645781	-0.00402808
C3	1	CBF4	0.713932	-0.00234005
C3	2	CBF4	0.714612	-0.00264765
C3	3	CBF4	0.715293	-0.00295519
C3	4	CBF4	0.71699	-0.0022463
C3	5	CBF4	0.716996	-0.00322743
C3	6	CBF4	0.719473	-0.00173843
C3	7	CBF4	0.721825	-0.000374891
C3	8	CBF4	0.723867	0.000678879
C3	9	CBF4	0.724355	0.000178756
C3	10	CBF4	0.725176	1.24193e-05
C3	11	CBF4	0.727043	0.000891429
C3	12	CBF4	0.729712	0.00257206
C3	13	CBF4	0.73063	0.00250246
C3	14	CBF4	0.730221	0.00110559
C3	15	CBF4	0.732933	0.00282955
C3	16	CBF4	0.73421	0.00311782
C3	17	CBF4	0.733804	0.00172458
C3	18	CBF4	0.734924	0.00185674
C3	19	CBF4	0.734935	0.000878829
C3	20	CBF4	0.735401	0.000357606
C3	21	CBF4	0.737185	0.00115317
C3	22	CBF4	0.737047	2.78528e-05
C3	23	CBF4	0.737836	-0.000172101
C3	24	CBF4	0.738933	-6.2886e-05
C3	25	CBF4	0.738251	-0.00173233
C3	26	CBF4	0.739308	-0.00166371
C3	27	CBF4	0.74044	-0.00151998
C3	28	CBF4	0.741094	-0.00185363
C3	29	CBF4	0.741658	-0.00227728
C3	30	CBF4	0.744487	-0.000437026
C3	31	CBF4	0.746285	0.000373437
C3	32	CBF4	0.753777	0.00687764
C3	33	CBF4	0.765385	0.017498
C3	34	CBF4	0.788087	0.039212
C3	35	CBF4	0.833875	0.0840115
C3	36	CBF4	0.911044	0.160193
C3	37	CBF4	1.0528	0.300965
C3	38	CBF4	1.27227	0.519445
C3	39	CBF4	1.55882	0.805008
C3	40	CBF4	1.83098	1.07618
C4	1	CBF4	0.643166	-0.00395805
C4	2	CBF4	0.644633	-0.00319954
C4	3	CBF4	0.646538	-0.00200388
C4	4	CBF4	0.648476	-0.000775385
C4	5	CBF4	0.647437	-0.00252348
C4	6	CBF4	0.649437	-0.00123187
C4	7	CBF4	0.650686	-0.000692042
C4	8	CBF4	0.652503	0.000415397
C4	9	CBF4	0.654643	0.00184667
C4	10	CBF4	0.65425	0.000744028
C4	11	CBF4	0.656041	0.00182661
C4	12	CBF4	0.655547	0.000623478
C4	13	CBF4	0.656796	0.00116277
C4	14	CBF4	0.658405	0.00206332
C4	15	CBF4	0.658282	0.00123081
C4	16	CBF4	0.658242	0.000481918
C4	17	CBF4	0.660899	0.0024299
C4	18	CBF4	0.660868	0.0016899
C4	19	CBF4	0.660204	0.000316769
C4	20	CBF4	0.661146	0.000550167
C4	21	CBF4	0.660698	-0.000606894
C4	22	CBF4	0.661794	-0.00022067
C4	23	CBF4	0.661469	-0.00125423
C4	24	CBF4	0.662269	-0.00116394
C4	25	CBF4	0.66201	-0.00213194
C4	26	CBF4	0.662396	-0.00245429
C4	27	CBF4	0.663166	-0.00239339
C4	28	CBF4	0.663001	-0.00326763
C4	29	CBF4	0.665434	-0.00154417
C4	30	CBF4	0.66856	0.00087266
C4	31	CBF4	0.674405	0.00600943
C4	32	CBF4	0.682836	0.0137313
C4	33	CBF4	0.703077	0.0332633
C4	34	CBF4	0.741154	0.070631
C4	35	CBF4	0.810308	0.139075
C4	36	CBF4	0.93128	0.259338
C4	37	CBF4	1.1253	0.452652
C4	38	CBF4	1.37746	0.704103
C4	39	CBF4	1.61167	0.937598
C4	40	CBF4	1.79716	1.12238
C5	1	CBF4	0.479223	-0.00428956
C5	2	CBF4	0.480186	-0.00415491
C5	3	CBF4	0.482564	-0.00260625
C5	4	CBF4	0.483706	-0.00229291
C5	5	CBF4	0.484895	-0.00193241
C5	6	CBF4	0.485884	-0.00177228
C5	7	CBF4	0.488274	-0.00021045
C5	8	CBF4	0.489473	0.000159969
C5	9	CBF4	0.490346	0.000204321
C5	10	CBF4	0.492009	0.00103838
C5	11	CBF4	0.49312	0.00132031
C5	12	CBF4	0.494988	0.00235953
C5	13	CBF4	0.495114	0.00165745
C5	14	CBF4	0.495544	0.00125855
C5	15	CBF4	0.497799	0.00268445
C5	16	CBF4	0.497373	0.0014296
C5	17	CBF4	0.498191	0.00141888
C5	18	CBF4	0.498991	0.00139072
C5	19	CBF4	0.500312	0.00188279
C5	20	CBF4	0.49895	-0.000307583
C5	21	CBF4	0.500026	-6.04857e-05
C5	22	CBF4	0.500886	-2.87995e-05
C5	23	CBF4	0.501158	-0.00058559
C5	24	CBF4	0.502361	-0.000211475
C5	25	CBF4	0.502383	-0.00101789
C5	26	CBF4	0.502454	-0.00177579
C5	27	CBF4	0.503402	-0.00165684
C5	28	CBF4	0.503774	-0.0021132
C5	29	CBF4	0.504795	-0.00192117
C5	30	CBF4	0.506858	-0.000687082
C5	31	CBF4	0.510749	0.00237526
C5	32	CBF4	0.515656	0.00645327
C5	33	CBF4	0.526434	0.0164029
C5	34	CBF4	0.547352	0.0364923
C5	35	CBF4	0.586143	0.0744545
C5	36	CBF4	0.659419	0.146902
C5	37	CBF4	0.787737	0.274391
C5	38	CBF4	0.991326	0.477152
C5	39	CBF4	1.25948	0.744475
C5	40	CBF4	1.51581	0.999978
C6	1	CBF4	0.574183	-0.0118397
C6	2	CBF4	0.57748	-0.0089794
C6	3	CBF4	0.580617	-0.00627899
C6	4	CBF4	0.581453	-0.00587957
C6	5	CBF4	0.583536	-0.0042325
C6	6	CBF4	0.584936	-0.00326934
C6	7	CBF4	0.5856	-0.00304229
C6	8	CBF4	0.588615	-0.000463425
C6	9	CBF4	0.589733	0.000217869
C6	10	CBF4	0.590864	0.000911442
C6	11	CBF4	0.591537	0.00114826
C6	12	CBF4	0.593682	0.00285607
C6	13	CBF4	0.593262	0.00199998
C6	14	CBF4	0.593689	0.00199064
C6	15	CBF4	0.594146	0.0020105
C6	16	CBF4	0.59585	0.00327806
C6	17	CBF4	0.596348	0.00333965
C6	18	CBF4	0.596532	0.00308682
C6	19	CBF4	0.59722	0.00333836
C6	20	CBF4	0.596597	0.00227801
C6	21	CBF4	0.59707	0.00231486
C6	22	CBF4	0.597398	0.00220585
C6	23	CBF4	0.597996	0.00236745
C6	24	CBF4	0.599016	0.00295111
C6	25	CBF4	0.598307	0.00180463
C6	26	CBF4	0.598511	0.00157225
C6	27	CBF4	0.598278	0.000903078
C6	28	CBF4	0.597999	0.00018712
C6	29	CBF4	0.59897	0.000721489
C6	30	CBF4	0.598329	-0.00035621
C6	31	CBF4	0.59951	0.000388384
C6	32	CBF4	0.599488	-7.06781e-05
C6	33	CBF4	0.597828	-0.00216696
C6	34	CBF4	0.597611	-0.00282093
C6	35	CBF4	0.599713	-0.00115538
C6	36	CBF4	0.598988	-0.00231701
C6	37	CBF4	0.59922	-0.00252162
C6	38	CBF4	0.598718	-0.00346026
C6	39	CBF4	0.598778	-0.00383671
C6	40	CBF4	0.599929	-0.00312257
C7	1	CBF5	0.565208	-0.00537955
C7	2	CBF5	0.569036	-0.00301993
C7	3	CBF5	0.571969	-0.0015554
C7	4	CBF5	0.572913	-0.00207935
C7	5	CBF5	0.575926	-0.000535364
C7	6	CBF5	0.577987	5.7984e-05
C7	7	CBF5	0.580545	0.00114754
C7	8	CBF5	0.582614	0.00174756
C7	9	CBF5	0.583608	0.00127315
C7	10	CBF5	0.584802	0.000998896
C7	11	CBF5	0.586787	0.00151547
C7	12	CBF5	0.587724	0.00098432
C7	13	CBF5	0.589376	0.00116824
C7	14	CBF5	0.589989	0.000312363
C7	15	CBF5	0.59045	-0.000694852
C7	16	CBF5	0.593196	0.000582935
C7	17	CBF5	0.593259	-0.000822857
C7	18	CBF5	0.593429	-0.00212118
C7	19	CBF5	0.595347	-0.00167166
C7	20	CBF5	0.596489	-0.00199807
C7	21	CBF5	0.597767	-0.00218829
C7	22	CBF5	0.600537	-0.000886657
C7	23	CBF5	0.602998	0.00010628
C7	24	CBF5	0.609019	0.00465893
C7	25	CBF5	0.618679	0.0128508
C7	26	CBF5	0.639556	0.0322593
C7	27	CBF5	0.6786	0.069835
C7	28	CBF5	0.747964	0.13773
C7	29	CBF5	0.87265	0.260948
C7	30	CBF5	1.07865	0.46548
C7	31	CBF5	1.37909	0.764455
C7	32	CBF5	1.75259	1.13648
C7	33	CBF5	2.13819	1.52062
C7	34	CBF5	2.45682	1.83778
C7	35	CBF5	2.69087	2.07036
C7	36	CBF5	2.86537	2.24339
C7	37	CBF5	3.0025	2.37905
C7	38	CBF5	3.10556	2.48064
C7	39	CBF5	3.18706	2.56068
C7	40	CBF5	3.25408	2.62623
C8	1	CBF5	0.573847	-3.61815e-05
C8	2	CBF5	0.574895	4.35501e-06
C8	3	CBF5	0.574733	-0.00116502
C8	4	CBF5	0.576933	2.77903e-05
C8	5	CBF5	0.578221	0.000308712
C8	6	CBF5	0.579289	0.000369514
C8	7	CBF5	0.580151	0.000224084
C8	8	CBF5	0.581624	0.000690019
C8	9	CBF5	0.582343	0.000402134
C8	10	CBF5	0.583969	0.00102095
C8	11	CBF5	0.584671	0.000715904
C8	12	CBF5	0.584972	9.89181e-06
C8	13	CBF5	0.586317	0.000347021
C8	14	CBF5	0.586482	-0.000494889
C8	15	CBF5	0.58814	0.000155641
C8	16	CBF5	0.589135	0.000143785
C8	17	CBF5	0.589375	-0.000623739
C8	18	CBF5	0.5892	-0.00180522
C8	19	CBF5	0.590679	-0.00133398
C8	20	CBF5	0.590722	-0.00229855
C8	21	CBF5	0.593149	-0.00087817
C8	22	CBF5	0.594246	-0.000788578
C8	23	CBF5	0.596688	0.00064617
C8	24	CBF5	0.601375	0.00432652
C8	25	CBF5	0.609577	0.0115205
C8	26	CBF5	0.626608	0.0275452
C8	27	CBF5	0.66092	0.0608494
C8	28	CBF5	0.721214	0.120136
C8	29	CBF5	0.829164	0.227079
C8	30	CBF5	1.00917	0.406076
C8	31	CBF5	1.27415	0.670056
C8	32	CBF5	1.60632	1.00121
C8	33	CBF5	1.94976	1.34365
C8	34	CBF5	2.24166	1.63454
C8	35	CBF5	2.45949	1.85136
C8	36	CBF5	2.62361	2.01448
C8	37	CBF5	2.75209	2.14195
C8	38	CBF5	2.84854	2.23739
C8	39	CBF5	2.92915	2.31699
C8	40	CBF5	2.99656	2.3834
C9	1	CBF5	0.560803	-0.00217521
C9	2	CBF5	0.563052	-0.00128218
C9	3	CBF5	0.565444	-0.000245687
C9	4	CBF5	0.567304	0.000258125
C9	5	CBF5	0.568155	-0.000247289
C9	6	CBF5	0.568526	-0.00123187
C9	7	CBF5	0.572384	0.0012693
C9	8	CBF5	0.573124	0.000653258
C9	9	CBF5	0.574235	0.000408614
C9	10	CBF5	0.575294	0.000111518
C9	11	CBF5	0.577521	0.000982375
C9	12	CBF5	0.578728	0.000833456
C9	13	CBF5	0.579949	0.000698783
C9	14	CBF5	0.580231	-0.000374962
C9	15	CBF5	0.581488	-0.000474647
C9	16	CBF5	0.583674	0.000355202
C9	17	CBF5	0.58397	-0.000704535
C9	18	CBF5	0.584045	-0.00198517
C9	19	CBF5	0.586233	-0.00115365
C9	20	CBF5	0.58661	-0.00213268
C9	21	CBF5	0.588068	-0.00203078
C9	22	CBF5	0.590918	-0.00053688
C9	23	CBF5	0.592988	0.000177038
C9	24	CBF5	0.599537	0.00537048
C9	25	CBF5	0.609519	0.0139962
C9	26	CBF5	0.629215	0.0323366
C9	27	CBF5	0.667786	0.0695514
C9	28	CBF5	0.737162	0.137571
C9	29	CBF5	0.862172	0.261226
C9	30	CBF5	1.06906	0.466759
C9	31	CBF5	1.37367	0.770014
C9	32	CBF5	1.75594	1.15093
C9	33	CBF5	2.14604	1.53967
C9	34	CBF5	2.47939	1.87166
C9	35	CBF5	2.72257	2.11348
C9	36	CBF5	2.908	2.29757
C9	37	CBF5	3.05519	2.44339
C9	38	CBF5	3.16619	2.55304
C9	39	CBF5	3.25859	2.64409
C9	40	CBF5	3.3231	2.70724
C10	1	CBF5	0.548523	-0.00653375
C10	2	CBF5	0.552578	-0.00323859
C10	3	CBF5	0.553177	-0.00339848
C10	4	CBF5	0.554956	-0.00237849
C10	5	CBF5	0.556111	-0.00198352
C10	6	CBF5	0.558104	-0.000749488
C10	7	CBF5	0.559432	-0.000180887
C10	8	CBF5	0.560731	0.000359343
C10	9	CBF5	0.562077	0.000945587
C10	10	CBF5	0.56291	0.00101959
C10	11	CBF5	0.565163	0.00251325
C10	12	CBF5	0.566058	0.00264865
C10	13	CBF5	0.565452	0.00128338
C10	14	CBF5	0.566829	0.00190098
C10	15	CBF5	0.566899	0.00121168
C10	16	CBF5	0.5692	0.00275279
C10	17	CBF5	0.567669	0.000462575
C10	18	CBF5	0.568393	0.000427799
C10	19	CBF5	0.57074	0.00201516
C10	20	CBF5	0.569368	-0.000115849
C10	21	CBF5	0.570385	0.000141378
C10	22	CBF5	0.570621	-0.000382216
C10	23	CBF5	0.568999	-0.00276327
C10	24	CBF5	0.571519	-0.00100234
C10	25	CBF5	0.572421	-0.000859909
C10	26	CBF5	0.572629	-0.0014108
C10	27	CBF5	0.571674	-0.00312506
C10	28	CBF5	0.572681	-0.00287725
C10	29	CBF5	0.574274	-0.00204436
C10	30	CBF5	0.577577	0.00049948
C10	31	CBF5	0.582927	0.00509026
C10	32	CBF5	0.591585	0.0129889
C10	33	CBF5	0.610975	0.0316195
C10	34	CBF5	0.648775	0.0686601
C10	35	CBF5	0.714359	0.133485
C10	36	CBF5	0.830402	0.248769
C10	37	CBF5	1.01361	0.431215
C10	38	CBF5	1.2639	0.680745
C10	39	CBF5	1.55332	0.969407
C10	40	CBF5	1.82837	1.2437
C11	1	CBF5	0.618269	-0.00330074
C11	2	CBF5	0.620473	-0.00173464
C11	3	CBF5	0.621063	-0.00178234
C11	4	CBF5	0.621581	-0.00190186
C11	5	CBF5	0.622491	-0.00162983
C11	6	CBF5	0.624183	-0.000575442
C11	7	CBF5	0.624367	-0.00102946
C11	8	CBF5	0.625785	-0.000250147
C11	9	CBF5	0.627708	0.00103509
C11	10	CBF5	0.62782	0.000509904
C11	11	CBF5	0.62851	0.000561925
C11	12	CBF5	0.630179	0.00159277
C11	13	CBF5	0.631277	0.00205321
C11	14	CBF5	0.631493	0.00163083
C11	15	CBF5	0.632192	0.0016918
C11	16	CBF5	0.632894	0.00175562
C11	17	CBF5	0.632156	0.000379811
C11	18	CBF5	0.632432	1.77589e-05
C11	19	CBF5	0.635176	0.00212393
C11	20	CBF5	0.634142	0.000452846
C11	21	CBF5	0.634295	-3.27074e-05
C11	22	CBF5	0.635763	0.000798108
C11	23	CBF5	0.63495	-0.000653398
C11	24	CBF5	0.635483	-0.000757958
C11	25	CBF5	0.63526	-0.00161878
C11	26	CBF5	0.635814	-0.00170284
C11	27	CBF5	0.635919	-0.00223578
C11	28	CBF5	0.636556	-0.0022368
C11	29	CBF5	0.638148	-0.00128243
C11	30	CBF5	0.639586	-0.000482845
C11	31	CBF5	0.644275	0.00356901
C11	32	CBF5	0.650685	0.00934015
C11	33	CBF5	0.663772	0.0217899
C11	34	CBF5	0.690178	0.0475574
C11	35	CBF5	0.738449	0.0951909
C11	36	CBF5	0.825564	0.181668
C11	37	CBF5	0.966553	0.322019
C11	38	CBF5	1.16486	0.519691
C11	39	CBF5	1.40174	0.755932
C11	40	CBF5	1.64056	0.994112
C12	1	CBF5	0.489435	-0.00102354
C12	2	CBF5	0.489588	-0.00155766
C12	3	CBF5	0.490658	-0.00117453
C12	4	CBF5	0.491164	-0.00135516
C12	5	CBF5	0.492963	-0.000242914
C12	6	CBF5	0.492787	-0.0011054
C12	7	CBF5	0.494418	-0.000161353
C12	8	CBF5	0.494995	-0.00027106
C12	9	CBF5	0.49504	-0.000912768
C12	10	CBF5	0.496987	0.000348045
C12	11	CBF5	0.498711	0.00138471
C12	12	CBF5	0.498232	0.000219678
C12	13	CBF5	0.499784	0.00108445
C12	14	CBF5	0.500588	0.00120231
C12	15	CBF5	0.501831	0.00175809
C12	16	CBF5	0.501475	0.000714916
C12	17	CBF5	0.503044	0.00159739
C12	18	CBF5	0.502839	0.000706027
C12	19	CBF5	0.502769	-5.1344e-05
C12	20	CBF5	0.503878	0.000371457
C12	21	CBF5	0.505155	0.00096139
C12	22	CBF5	0.505161	0.000281327
C12	23	CBF5	0.505464	-0.00010274
C12	24	CBF5	0.504766	-0.00148751
C12	25	CBF5	0.505552	-0.00138824
C12	26	CBF5	0.506804	-0.000823462
C12	27	CBF5	0.507076	-0.00123787
C12	28	CBF5	0.507938	-0.00106249
C12	29	CBF5	0.509228	-0.000459559
C12	30	CBF5	0.511581	0.0012066
C12	31	CBF5	0.517296	0.0062357
C12	32	CBF5	0.5279	0.0161525
C12	33	CBF5	0.547725	0.035291
C12	34	CBF5	0.585677	0.0725556
C12	35	CBF5	0.655186	0.141379
C12	36	CBF5	0.775714	0.26122
C12	37	CBF5	0.969697	0.454516
C12	38	CBF5	1.23355	0.717682
C12	39	CBF5	1.53834	1.02179
C12	40	CBF5	1.83038	1.31314
D1	1	CBF4	0.622172	-0.011729
D1	2	CBF4	0.625093	-0.00955704
D1	3	CBF4	0.627831	-0.00756893
D1	4	CBF4	0.629564	-0.0065851
D1	5	CBF4	0.632409	-0.00448852
D1	6	CBF4	0.634186	-0.00346094
D1	7	CBF4	0.635072	-0.00332463
D1	8	CBF4	0.639238	9.26802e-05
D1	9	CBF4	0.640347	0.000452627
D1	10	CBF4	0.642107	0.00146316
D1	11	CBF4	0.643165	0.0017722
D1	12	CBF4	0.644762	0.00262013
D1	13	CBF4	0.644423	0.00153127
D1	14	CBF4	0.645767	0.00212653
D1	15	CBF4	0.647684	0.00329478
D1	16	CBF4	0.64849	0.0033508
D1	17	CBF4	0.649616	0.00372839
D1	18	CBF4	0.649883	0.00324618
D1	19	CBF4	0.648724	0.00133799
D1	20	CBF4	0.651209	0.0030732
D1	21	CBF4	0.651149	0.00226394
D1	22	CBF4	0.653008	0.00337365
D1	23	CBF4	0.655141	0.00475779
D1	24	CBF4	0.652659	0.00152637
D1	25	CBF4	0.654738	0.0028571
D1	26	CBF4	0.653127	0.000496335
D1	27	CBF4	0.6538	0.000419857
D1	28	CBF4	0.654487	0.000357862
D1	29	CBF4	0.655784	0.000905921
D1	30	CBF4	0.655611	-1.64672e-05
D1	31	CBF4	0.657349	0.000972785
D1	32	CBF4	0.655044	-0.0020813
D1	33	CBF4	0.65695	-0.000924323
D1	34	CBF4	0.656442	-0.00218187
D1	35	CBF4	0.65666	-0.00271331
D1	36	CBF4	0.658183	-0.00193899
D1	37	CBF4	0.658516	-0.00235516
D1	38	CBF4	0.657238	-0.00438285
D1	39	CBF4	0.658371	-0.00399918
D1	40	CBF4	0.655647	-0.00747235
D2	1	CBF4	0.604399	-0.00354665
D2	2	CBF4	0.605125	-0.00392643
D2	3	CBF4	0.60574	-0.00441642
D2	4	CBF4	0.609075	-0.00218743
D2	5	CBF4	0.610793	-0.00157527
D2	6	CBF4	0.611329	-0.00214466
D2	7	CBF4	0.613749	-0.000830297
D2	8	CBF4	0.616847	0.00116201
D2	9	CBF4	0.617265	0.000474307
D2	10	CBF4	0.619461	0.00156509
D2	11	CBF4	0.621502	0.00250001
D2	12	CBF4	0.623523	0.00341567
D2	13	CBF4	0.623324	0.00211172
D2	14	CBF4	0.622665	0.000346607
D2	15	CBF4	0.625194	0.00176969
D2	16	CBF4	0.62669	0.00216023
D2	17	CBF4	0.626976	0.00134051
D2	18	CBF4	0.627893	0.00115271
D2	19	CBF4	0.62961	0.00176404
D2	20	CBF4	0.630182	0.00122988
D2	21	CBF4	0.628261	-0.00179653
D2	22	CBF4	0.631045	-0.000117684
D2	23	CBF4	0.632878	0.000609511
D2	24	CBF4	0.631986	-0.00138794
D2	25	CBF4	0.633031	-0.0014486
D2	26	CBF4	0.63419	-0.00139571
D2	27	CBF4	0.634202	-0.00248902
D2	28	CBF4	0.635677	-0.00211928
D2	29	CBF4	0.636141	-0.00276156
D2	30	CBF4	0.640603	0.000595096
D2	31	CBF4	0.643587	0.00247332
D2	32	CBF4	0.651077	0.00885801
D2	33	CBF4	0.662875	0.0195501
D2	34	CBF4	0.692303	0.047873
D2	35	CBF4	0.739637	0.094101
D2	36	CBF4	0.832701	0.18606
D2	37	CBF4	0.990969	0.343222
D2	38	CBF4	1.23317	0.584318
D2	39	CBF4	1.53695	0.886993
D2	40	CBF4	1.80667	1.15561
D3	1	CBF4	0.720493	-0.00697415
D3	2	CBF4	0.722133	-0.00595978
D3	3	CBF4	0.722453	-0.00626488
D3	4	CBF4	0.722473	-0.00687056
D3	5	CBF4	0.724491	-0.00547842
D3	6	CBF4	0.726193	-0.00440182
D3	7	CBF4	0.728444	-0.00277561
D3	8	CBF4	0.73138	-0.00046537
D3	9	CBF4	0.73076	-0.00171079
D3	10	CBF4	0.734468	0.0013718
D3	11	CBF4	0.734738	0.00101622
D3	12	CBF4	0.737185	0.00283746
D3	13	CBF4	0.736848	0.0018751
D3	14	CBF4	0.738543	0.00294461
D3	15	CBF4	0.738168	0.00194416
D3	16	CBF4	0.739957	0.00310677
D3	17	CBF4	0.742361	0.00488533
D3	18	CBF4	0.7417	0.00359944
D3	19	CBF4	0.74307	0.00434321
D3	20	CBF4	0.742364	0.00301178
D3	21	CBF4	0.743087	0.00310919
D3	22	CBF4	0.742966	0.0023629
D3	23	CBF4	0.744759	0.00353069
D3	24	CBF4	0.744956	0.00310192
D3	25	CBF4	0.745046	0.00256597
D3	26	CBF4	0.744785	0.00167973
D3	27	CBF4	0.745462	0.00173119
D3	28	CBF4	0.744921	0.000565101
D3	29	CBF4	0.745717	0.00073541
D3	30	CBF4	0.745916	0.000308601
D3	31	CBF4	0.746003	-0.000229789
D3	32	CBF4	0.745967	-0.000890845
D3	33	CBF4	0.747233	-0.000250851
D3	34	CBF4	0.745245	-0.0028639
D3	35	CBF4	0.746669	-0.00206631
D3	36	CBF4	0.746451	-0.00290922
D3	37	CBF4	0.74582	-0.00416573
D3	38	CBF4	0.745414	-0.00519728
D3	39	CBF4	0.747152	-0.00408522
D3	40	CBF4	0.746258	-0.0056047
D4	1	CBF4	0.721252	-0.00858479
D4	2	CBF4	0.723947	-0.00606507
D4	3	CBF4	0.724378	-0.00580866
D4	4	CBF4	0.725799	-0.00456311
D4	5	CBF4	0.723918	-0.00661876
D4	6	CBF4	0.727107	-0.00360485
D4	7	CBF4	0.728219	-0.00266799
D4	8	CBF4	0.729965	-0.00109688
D4	9	CBF4	0.731464	0.000227052
D4	10	CBF4	0.732374	0.000961852
D4	11	CBF4	0.731479	-0.000107938
D4	12	CBF4	0.734919	0.00315702
D4	13	CBF4	0.734015	0.00207734
D4	14	CBF4	0.735172	0.00305961
D4	15	CBF4	0.735164	0.00287668
D4	16	CBF4	0.734764	0.00230161
D4	17	CBF4	0.736739	0.00410202
D4	18	CBF4	0.736167	0.00335475
D4	19	CBF4	0.736261	0.00327416
D4	20	CBF4	0.736924	0.00376178
D4	21	CBF4	0.735633	0.0022961
D4	22	CBF4	0.736134	0.0026213
D4	23	CBF4	0.736415	0.00272733
D4	24	CBF4	0.734934	0.00107222
D4	25	CBF4	0.736315	0.00227813
D4	26	CBF4	0.735192	0.00097988
D4	27	CBF4	0.736373	0.00198606
D4	28	CBF4	0.733942	-0.000619921
D4	29	CBF4	0.735724	0.000986896
D4	30	CBF4	0.73429	-0.000621959
D4	31	CBF4	0.735196	0.000108788
D4	32	CBF4	0.734297	-0.000964935
D4	33	CBF4	0.733246	-0.00219125
D4	34	CBF4	0.733767	-0.00184561
D4	35	CBF4	0.734	-0.00178744
D4	36	CBF4	0.734589	-0.00137343
D4	37	CBF4	0.734934	-0.00120303
D4	38	CBF4	0.731864	-0.00444868
D4	39	CBF4	0.731801	-0.00468615
D4	40	CBF4	0.732844	-0.0038182
D5	1	CBF4	0.617115	-0.0101052
D5	2	CBF4	0.618971	-0.00851082
D5	3	CBF4	0.622389	-0.00535433
D5	4	CBF4	0.622764	-0.00524043
D5	5	CBF4	0.624435	-0.00383078
D5	6	CBF4	0.625655	-0.00287311
D5	7	CBF4	0.627738	-0.0010507
D5	8	CBF4	0.628024	-0.00102673
D5	9	CBF4	0.62746	-0.00185214
D5	10	CBF4	0.628876	-0.000697296
D5	11	CBF4	0.63063	0.000795504
D5	12	CBF4	0.632356	0.00226005
D5	13	CBF4	0.633803	0.00344535
D5	14	CBF4	0.632279	0.00166019
D5	15	CBF4	0.632367	0.00148615
D5	16	CBF4	0.635971	0.00482943
D5	17	CBF4	0.634412	0.00300821
D5	18	CBF4	0.634624	0.00295904
D5	19	CBF4	0.634703	0.00277677
D5	20	CBF4	0.635175	0.00298748
D5	21	CBF4	0.634192	0.00174335
D5	22	CBF4	0.63431	0.0016
D5	23	CBF4	0.635668	0.00269583
D5	24	CBF4	0.6338	0.000566876
D5	25	CBF4	0.636192	0.00269733
D5	26	CBF4	0.636368	0.00261221
D5	27	CBF4	0.634311	0.00029389
D5	28	CBF4	0.63389	-0.000388582
D5	29	CBF4	0.634478	-6.27816e-05
D5	30	CBF4	0.634513	-0.000288682
D5	31	CBF4	0.634459	-0.000603751
D5	32	CBF4	0.634748	-0.000576451
D5	33	CBF4	0.635402	-0.00018443
D5	34	CBF4	0.634985	-0.000862551
D5	35	CBF4	0.634136	-0.00197304
D5	36	CBF4	0.633331	-0.00303955
D5	37	CBF4	0.635146	-0.00148553
D5	38	CBF4	0.63392	-0.00297333
D5	39	CBF4	0.633101	-0.00405348
D5	40	CBF4	0.633358	-0.00405825
D6	1	CBF4	0.65113	-0.0174434
D6	2	CBF4	0.65806	-0.0113613
D6	3	CBF4	0.660154	-0.010115
D6	4	CBF4	0.662751	-0.00836543
D6	5	CBF4	0.665934	-0.00602999
D6	6	CBF4	0.668858	-0.00395276
D6	7	CBF4	0.671148	-0.0025109
D6	8	CBF4	0.672786	-0.00172012
D6	9	CBF4	0.675689	0.000335604
D6	10	CBF4	0.677993	0.0017923
D6	11	CBF4	0.678765	0.00171596
D6	12	CBF4	0.680524	0.00262762
D6	13	CBF4	0.681657	0.00291303
D6	14	CBF4	0.683517	0.0039259
D6	15	CBF4	0.684736	0.0042969
D6	16	CBF4	0.685718	0.0044318
D6	17	CBF4	0.686163	0.00402978
D6	18	CBF4	0.687777	0.00479625
D6	19	CBF4	0.687507	0.00367796
D6	20	CBF4	0.688953	0.00427635
D6	21	CBF4	0.688367	0.00284346
D6	22	CBF4	0.689809	0.00343797
D6	23	CBF4	0.690512	0.00329351
D6	24	CBF4	0.691314	0.00324816
D6	25	CBF4	0.690803	0.00188973
D6	26	CBF4	0.691071	0.00130985
D6	27	CBF4	0.692547	0.00193845
D6	28	CBF4	0.69207	0.000613278
D6	29	CBF4	0.693104	0.000800034
D6	30	CBF4	0.692119	-0.00103226
D6	31	CBF4	0.693468	-0.000530492
D6	32	CBF4	0.694025	-0.000820931
D6	33	CBF4	0.693913	-0.00178043
D6	34	CBF4	0.693395	-0.00314662
D6	35	CBF4	0.696328	-0.00106044
D6	36	CBF4	0.694925	-0.00331163
D6	37	CBF4	0.696126	-0.00295786
D6	38	CBF4	0.695079	-0.00485197
D6	39	CBF4	0.694772	-0.00600703
D6	40	CBF4	0.695845	-0.00578147
D7	1	CBF5	0.653439	-0.00669827
D7	2	CBF5	0.656854	-0.0035661
D7	3	CBF5	0.65925	-0.0014534
D7	4	CBF5	0.659162	-0.00182317
D7	5	CBF5	0.660521	-0.000747418
D7	6	CBF5	0.66076	-0.000790978
D7	7	CBF5	0.663069	0.00123506
D7	8	CBF5	0.664131	0.00201487
D7	9	CBF5	0.663091	0.000692318
D7	10	CBF5	0.66374	0.00105896
D7	11	CBF5	0.663727	0.000762973
D7	12	CBF5	0.6642	0.0009536
D7	13	CBF5	0.664964	0.00143468
D7	14	CBF5	0.66422	0.000407943
D7	15	CBF5	0.664411	0.000315984
D7	16	CBF5	0.664118	-0.000259249
D7	17	CBF5	0.664817	0.000157101
D7	18	CBF5	0.663979	-0.000963752
D7	19	CBF5	0.664304	-0.000920826
D7	20	CBF5	0.663455	-0.00205247
D7	21	CBF5	0.66457	-0.00122008
D7	22	CBF5	0.66363	-0.00244321
D7	23	CBF5	0.667386	0.00103014
D7	24	CBF5	0.669249	0.00261093
D7	25	CBF5	0.676399	0.00947823
D7	26	CBF5	0.688995	0.0217914
D7	27	CBF5	0.71409	0.046604
D7	28	CBF5	0.761131	0.0933622
D7	29	CBF5	0.847269	0.179218
D7	30	CBF5	0.989324	0.32099
D7	31	CBF5	1.20914	0.540523
D7	32	CBF5	1.48871	0.819813
D7	33	CBF5	1.77865	1.10947
D7	34	CBF5	2.03244	1.36297
D7	35	CBF5	2.2139	1.54416
D7	36	CBF5	2.35966	1.68963
D7	37	CBF5	2.47147	1.80116
D7	38	CBF5	2.56008	1.88949
D7	39	CBF5	2.62575	1.95487
D7	40	CBF5	2.68477	2.01361
D8	1	CBF5	0.59023	-0.00302179
D8	2	CBF5	0.592152	-0.00153209
D8	3	CBF5	0.592318	-0.00179853
D8	4	CBF5	0.59297	-0.00157865
D8	5	CBF5	0.5937	-0.00128153
D8	6	CBF5	0.595457	4.33586e-05
D8	7	CBF5	0.597187	0.00134083
D8	8	CBF5	0.597208	0.000929849
D8	9	CBF5	0.598209	0.00149871
D8	10	CBF5	0.599204	0.00206203
D8	11	CBF5	0.598674	0.00109977
D8	12	CBF5	0.598705	0.000698146
D8	13	CBF5	0.599356	0.000917009
D8	14	CBF5	0.5997	0.000828074
D8	15	CBF5	0.599113	-0.000190574
D8	16	CBF5	0.59947	-0.000265741
D8	17	CBF5	0.599087	-0.00108138
D8	18	CBF5	0.599944	-0.000656876
D8	19	CBF5	0.599522	-0.00151078
D8	20	CBF5	0.599988	-0.00147746
D8	21	CBF5	0.599668	-0.00222944
D8	22	CBF5	0.601213	-0.00111704
D8	23	CBF5	0.603347	0.000585618
D8	24	CBF5	0.606379	0.00318461
D8	25	CBF5	0.614016	0.0103896
D8	26	CBF5	0.627678	0.0236198
D8	27	CBF5	0.654792	0.0503014
D8	28	CBF5	0.705687	0.100763
D8	29	CBF5	0.797665	0.19231
D8	30	CBF5	0.952051	0.346264
D8	31	CBF5	1.18375	0.577528
D8	32	CBF5	1.48095	0.8743
D8	33	CBF5	1.78111	1.17403
D8	34	CBF5	2.04889	1.44137
D8	35	CBF5	2.2422	1.63425
D8	36	CBF5	2.38514	1.77676
D8	37	CBF5	2.50406	1.89525
D8	38	CBF5	2.58599	1.97674
D8	39	CBF5	2.65598	2.04631
D8	40	CBF5	2.70862	2.09851
D9	1	CBF5	0.596234	-0.000334548
D9	2	CBF5	0.596739	-0.000962894
D9	3	CBF5	0.598514	-0.00032017
D9	4	CBF5	0.599149	-0.000818578
D9	5	CBF5	0.600848	-0.000252864
D9	6	CBF5	0.602711	0.0004773
D9	7	CBF5	0.60268	-0.000686117
D9	8	CBF5	0.605317	0.000818072
D9	9	CBF5	0.605454	-0.000178511
D9	10	CBF5	0.607355	0.000589442
D9	11	CBF5	0.608582	0.000683862
D9	12	CBF5	0.610138	0.0011073
D9	13	CBF5	0.61013	-3.44203e-05
D9	14	CBF5	0.612692	0.00139526
D9	15	CBF5	0.611951	-0.000479118
D9	16	CBF5	0.613343	-0.000219592
D9	17	CBF5	0.613909	-0.000786963
D9	18	CBF5	0.615459	-0.000369545
D9	19	CBF5	0.6158	-0.00116156
D9	20	CBF5	0.617497	-0.000597579
D9	21	CBF5	0.618299	-0.000928796
D9	22	CBF5	0.619934	-0.00042662
D9	23	CBF5	0.623683	0.0021892
D9	24	CBF5	0.628391	0.00576435
D9	25	CBF5	0.639414	0.0156544
D9	26	CBF5	0.659279	0.0343865
D9	27	CBF5	0.696751	0.070725
D9	28	CBF5	0.766655	0.139497
D9	29	CBF5	0.892236	0.263945
D9	30	CBF5	1.09885	0.469424
D9	31	CBF5	1.40339	0.772831
D9	32	CBF5	1.7884	1.15671
D9	33	CBF5	2.18281	1.54998
D9	34	CBF5	2.51285	1.8789
D9	35	CBF5	2.76636	2.13127
D9	36	CBF5	2.94687	2.31064
D9	37	CBF5	3.09524	2.45789
D9	38	CBF5	3.20081	2.56232
D9	39	CBF5	3.28628	2.64666
D9	40	CBF5	3.35976	2.719
D10	1	CBF5	0.582204	-0.00305188
D10	2	CBF5	0.584974	-0.00114407
D10	3	CBF5	0.584958	-0.00202122
D10	4	CBF5	0.58576	-0.00208179
D10	5	CBF5	0.588662	-4.09426e-05
D10	6	CBF5	0.588298	-0.00126708
D10	7	CBF5	0.590106	-0.000320336
D10	8	CBF5	0.590898	-0.000390624
D10	9	CBF5	0.593262	0.00111128
D10	10	CBF5	0.594363	0.0013507
D10	11	CBF5	0.595379	0.001505
D10	12	CBF5	0.596413	0.00167754
D10	13	CBF5	0.596738	0.00114008
D10	14	CBF5	0.597971	0.00151188
D10	15	CBF5	0.597488	0.000167361
D10	16	CBF5	0.599074	0.000891007
D10	17	CBF5	0.599816	0.000771606
D10	18	CBF5	0.601184	0.00127758
D10	19	CBF5	0.600388	-0.000380579
D10	20	CBF5	0.602216	0.000585778
D10	21	CBF5	0.601721	-0.00077048
D10	22	CBF5	0.602719	-0.000634595
D10	23	CBF5	0.603198	-0.00101703
D10	24	CBF5	0.603606	-0.00147111
D10	25	CBF5	0.604369	-0.00157007
D10	26	CBF5	0.605958	-0.000842907
D10	27	CBF5	0.606567	-0.00109511
D10	28	CBF5	0.610438	0.00191408
D10	29	CBF5	0.617438	0.00805185
D10	30	CBF5	0.629615	0.0193676
D10	31	CBF5	0.652907	0.0417977
D10	32	CBF5	0.699853	0.0878819
D10	33	CBF5	0.780883	0.16805
D10	34	CBF5	0.923441	0.309746
D10	35	CBF5	1.14375	0.529196
D10	36	CBF5	1.44786	0.83244
D10	37	CBF5	1.78939	1.17311
D10	38	CBF5	2.10639	1.48924
D10	39	CBF5	2.35666	1.73866
D10	40	CBF5	2.54411	1.92524
D11	1	CBF5	0.657869	-0.000434641
D11	2	CBF5	0.658639	-0.000614514
D11	3	CBF5	0.65916	-0.00104204
D11	4	CBF5	0.658881	-0.00227096
D11	5	CBF5	0.660293	-0.00180788
D11	6	CBF5	0.662527	-0.000523085
D11	7	CBF5	0.663464	-0.000535648
D11	8	CBF5	0.665144	0.000194761
D11	9	CBF5	0.666239	0.000341044
D11	10	CBF5	0.668358	0.0015108
D11	11	CBF5	0.667659	-0.000137554
D11	12	CBF5	0.669391	0.000644533
D11	13	CBF5	0.67227	0.00257496
D11	14	CBF5	0.673011	0.00236648
D11	15	CBF5	0.674676	0.00308175
D11	16	CBF5	0.672291	-0.00025288
D11	17	CBF5	0.673575	8.21718e-05
D11	18	CBF5	0.675301	0.000858894
D11	19	CBF5	0.67594	0.000548129
D11	20	CBF5	0.677188	0.000847239
D11	21	CBF5	0.676454	-0.000835923
D11	22	CBF5	0.676832	-0.00140698
D11	23	CBF5	0.678688	-0.000500977
D11	24	CBF5	0.678138	-0.00199966
D11	25	CBF5	0.680594	-0.000493142
D11	26	CBF5	0.680076	-0.00196036
D11	27	CBF5	0.682544	-0.000441914
D11	28	CBF5	0.685093	0.00115825
D11	29	CBF5	0.691345	0.00646069
D11	30	CBF5	0.702871	0.017037
D11	31	CBF5	0.725933	0.03915
D11	32	CBF5	0.768714	0.0809811
D11	33	CBF5	0.843447	0.154766
D11	34	CBF5	0.976612	0.286981
D11	35	CBF5	1.18186	0.491279
D11	36	CBF5	1.46119	0.769663
D11	37	CBF5	1.77426	1.08178
D11	38	CBF5	2.05639	1.36296
D11	39	CBF5	2.2765	1.58212
D11	40	CBF5	2.4474	1.75208
D12	1	CBF5	0.558748	-0.000743924
D12	2	CBF5	0.559207	-0.00117559
D12	3	CBF5	0.56013	-0.00114162
D12	4	CBF5	0.560692	-0.00147017
D12	5	CBF5	0.561727	-0.00132503
D12	6	CBF5	0.562075	-0.00186679
D12	7	CBF5	0.565292	0.000460708
D12	8	CBF5	0.564806	-0.000915748
D12	9	CBF5	0.566396	-0.000214983
D12	10	CBF5	0.568914	0.00141293
D12	11	CBF5	0.570544	0.00215226
D12	12	CBF5	0.57156	0.00227838
D12	13	CBF5	0.571209	0.00103746
D12	14	CBF5	0.572226	0.00116483
D12	15	CBF5	0.573407	0.00145564
D12	16	CBF5	0.573895	0.00105425
D12	17	CBF5	0.575446	0.00171503
D12	18	CBF5	0.575189	0.000567987
D12	19	CBF5	0.575461	-4.90462e-05
D12	20	CBF5	0.576141	-0.000259159
D12	21	CBF5	0.576557	-0.00073338
D12	22	CBF5	0.576166	-0.00201399
D12	23	CBF5	0.577218	-0.00185253
D12	24	CBF5	0.577582	-0.00237813
D12	25	CBF5	0.580272	-0.000578194
D12	26	CBF5	0.582112	0.000372613
D12	27	CBF5	0.583756	0.00112667
D12	28	CBF5	0.588988	0.00546886
D12	29	CBF5	0.599427	0.0150173
D12	30	CBF5	0.620058	0.0347582
D12	31	CBF5	0.658791	0.0726019
D12	32	CBF5	0.729588	0.142509
D12	33	CBF5	0.853845	0.265875
D12	34	CBF5	1.0567	0.467846
D12	35	CBF5	1.3466	0.756852
D12	36	CBF5	1.69261	1.10197
D12	37	CBF5	2.03456	1.44304
D12	38	CBF5	2.31822	1.7258
D12	39	CBF5	2.53193	1.93862
D12	40	CBF5	2.69818	2.10398
E1	1	CBF4	0.668076	-0.00649573
E1	2	CBF4	0.670129	-0.00481134
E1	3	CBF4	0.672076	-0.00323351
E1	4	CBF4	0.673979	-0.00169872
E1	5	CBF4	0.674757	-0.00128867
E1	6	CBF4	0.676594	0.00017966
E1	7	CBF4	0.677225	0.000441832
E1	8	CBF4	0.677336	0.000185025
E1	9	CBF4	0.677653	0.000133199
E1	10	CBF4	0.680127	0.00223853
E1	11	CBF4	0.679405	0.00114862
E1	12	CBF4	0.680752	0.00212736
E1	13	CBF4	0.680556	0.00156246
E1	14	CBF4	0.680855	0.00149257
E1	15	CBF4	0.680338	0.000607118
E1	16	CBF4	0.68087	0.00077112
E1	17	CBF4	0.679462	-0.00100555
E1	18	CBF4	0.681874	0.00103833
E1	19	CBF4	0.681938	0.000733481
E1	20	CBF4	0.682111	0.000538246
E1	21	CBF4	0.680147	-0.00179382
E1	22	CBF4	0.682463	0.000153558
E1	23	CBF4	0.680056	-0.00262184
E1	24	CBF4	0.682398	-0.000648422
E1	25	CBF4	0.683939	0.00052427
E1	26	CBF4	0.682676	-0.00110744
E1	27	CBF4	0.682889	-0.00126232
E1	28	CBF4	0.682985	-0.0015351
E1	29	CBF4	0.684989	0.000100482
E1	30	CBF4	0.687477	0.00221952
E1	31	CBF4	0.694182	0.00855641
E1	32	CBF4	0.705265	0.0192712
E1	33	CBF4	0.727117	0.0407541
E1	34	CBF4	0.77212	0.0853892
E1	35	CBF4	0.852433	0.165334
E1	36	CBF4	0.9873	0.299832
E1	37	CBF4	1.1926	0.504766
E1	38	CBF4	1.4355	0.747297
E1	39	CBF4	1.65442	0.965842
E1	40	CBF4	1.85756	1.16862
E2	1	CBF4	0.666538	-0.00579099
E2	2	CBF4	0.669469	-0.00349092
E2	3	CBF4	0.670255	-0.00333597
E2	4	CBF4	0.671857	-0.00236461
E2	5	CBF4	0.672221	-0.00263142
E2	6	CBF4	0.674673	-0.000810402
E2	7	CBF4	0.676049	-6.51846e-05
E2	8	CBF4	0.67811	0.00136465
E2	9	CBF4	0.678116	0.000740095
E2	10	CBF4	0.679981	0.00197443
E2	11	CBF4	0.679314	0.000675742
E2	12	CBF4	0.681462	0.00219314
E2	13	CBF4	0.681986	0.00208613
E2	14	CBF4	0.681774	0.0012433
E2	15	CBF4	0.683285	0.00212394
E2	16	CBF4	0.682432	0.000639703
E2	17	CBF4	0.683262	0.000838822
E2	18	CBF4	0.683754	0.000700341
E2	19	CBF4	0.684748	0.00106314
E2	20	CBF4	0.685159	0.000843174
E2	21	CBF4	0.685563	0.000616598
E2	22	CBF4	0.684563	-0.00101421
E2	23	CBF4	0.685847	-0.000361137
E2	24	CBF4	0.685283	-0.00155653
E2	25	CBF4	0.686615	-0.000854821
E2	26	CBF4	0.687402	-0.000698796
E2	27	CBF4	0.686758	-0.00197352
E2	28	CBF4	0.687589	-0.00177345
E2	29	CBF4	0.688583	-0.00141095
E2	30	CBF4	0.690062	-0.000562797
E2	31	CBF4	0.693566	0.0023106
E2	32	CBF4	0.700246	0.00836016
E2	33	CBF4	0.714268	0.0217511
[truncated: 1,847 more rows]

## Sheet: BioGroup Analysis Result
Block Type	96alum
Chemistry	SYBR_GREEN
Experiment File Name	D:\HAIFENG\118Untitled.eds
Experiment Run End Time	2021-08-28 18:15:02 PM CST
Instrument Type	sds7500
Passive Reference	ROX
Biogroup Name	Target Name	Task	RQ	RQ Min	RQ Max	Cт Mean	ΔCт Mean	ΔCт SE	ΔΔCт
Analysis Type	Singleplex
Endogenous Control	CBF4
RQ Min/Max Confidence Level	95.0
Reference Biogroup Name

## Sheet: Technical Analysis Result
Block Type	96alum
Chemistry	SYBR_GREEN
Experiment File Name	D:\HAIFENG\118Untitled.eds
Experiment Run End Time	2021-08-28 18:15:02 PM CST
Instrument Type	sds7500
Passive Reference	ROX
Sample Name	Target Name	Task	RQ	RQ Min	RQ Max	Cт Mean	ΔCт Mean	ΔCт SE	ΔΔCт
3-1	CBF5	UNKNOWN				28.261
9-3	CBF5	UNKNOWN				30.0112
3-2	CBF5	UNKNOWN				28.2995
12-1	CBF5	UNKNOWN				31.0304	-5.11116
3-3	CBF5	UNKNOWN				28.4908	-7.82681
12-2	CBF5	UNKNOWN				35.5979	-0.415352	0.490885
6-1	CBF5	UNKNOWN				28.768	-7.32159
12-3	CBF5	UNKNOWN				32.8993
6-2	CBF5	UNKNOWN				27.1966	-8.81327	0.415813
24-1	CBF5	UNKNOWN				29.9027	-7.04287
6-3	CBF5	UNKNOWN				27.7718	-8.51765
24-2	CBF5	UNKNOWN				29.3968	-6.95125
9-1	CBF5	UNKNOWN				31.3415	-5.22315
24-3	CBF5	UNKNOWN				29.115
9-2	CBF5	UNKNOWN				35.2411
Analysis Type	Singleplex
Endogenous Control	CBF4
RQ Min/Max Confidence Level	95.0
Reference Sample	3-1
