# Supplementary material for: Genome-wide identification of CBF genes and their responses to cold acclimation in Taraxacum kok-saghyz
Source: PeerJ journal article supplement (doi:10.7717/peerj.13429), 2022-05-12
Supplement: Raw_data.zip [file CBF5-CBF6.xls]

## Sheet: Results
Block Type	96alum
Chemistry	SYBR_GREEN
Experiment File Name	D:\HAIFENG\CBF56Untitled.eds
Experiment Run End Time	2013-01-10 07:57:55 AM CST
Instrument Type	sds7500
Passive Reference	ROX
Well	Sample Name	Target Name	Task	Reporter	Quencher	RQ	RQ Min	RQ Max	Cт	Cт Mean	Cт SD	ΔCт	ΔCт Mean	ΔCт SE	HK Control ΔCт Mean	HK Control ΔCт SE	ΔΔCт	Automatic Ct Threshold	Ct Threshold	Automatic Baseline	Baseline Start	Baseline End	Efficiency	Tm1	Tm2	Tm3	Comments	HIGHSD	NOAMP	OUTLIERRG	EXPFAIL
A2	3-1	CBF5	UNKNOWN	SYBR	None				30.3171	29.9861	0.604082							TRUE	0.0178418	TRUE	3	35	1	76.9841				Y	N	N	N
A3	3-1	CBF5	UNKNOWN	SYBR	None				29.3182	29.9861	0.604082							TRUE	0.0178418	TRUE	3	39	1	61.918				N	Y	N	Y
A4	3-1	CBF5	UNKNOWN	SYBR	None				30.3228	29.9861	0.604082							TRUE	0.0178418	TRUE	3	34	1	77.1614				Y	N	N	N
A5	12-3	CBF5	UNKNOWN	SYBR	None				31.2793	31.1182	0.28878							TRUE	0.0178418	TRUE	3	28	1	82.1243				N	N	N	N
A6	12-3	CBF5	UNKNOWN	SYBR	None				30.7848	31.1182	0.28878							TRUE	0.0178418	TRUE	3	28	1	81.9471				N	N	Y	N
A7	12-3	CBF5	UNKNOWN	SYBR	None				31.2905	31.1182	0.28878							TRUE	0.0178418	TRUE	3	28	1	81.9471				N	N	N	N
A8	6-2	CBF6	UNKNOWN	SYBR	None				26.1201	26.3076	0.193516							TRUE	0.180209	TRUE	3	21	1	81.0608				N	N	N	N
A9	6-2	CBF6	UNKNOWN	SYBR	None				26.2962	26.3076	0.193516							TRUE	0.180209	TRUE	3	21	1	81.0608				N	N	N	N
A10	6-2	CBF6	UNKNOWN	SYBR	None				26.5066	26.3076	0.193516							TRUE	0.180209	TRUE	3	22	1	80.8836				N	N	N	N
B2	3-2	CBF5	UNKNOWN	SYBR	None				29.6076	29.6402	1.82395							TRUE	0.0178418	TRUE	3	31	1	81.9471				Y	N	N	N
B3	3-2	CBF5	UNKNOWN	SYBR	None				29.6604	29.6402	1.82395							TRUE	0.0178418	TRUE	3	29	1	82.1243				Y	N	N	N
B4	3-2	CBF5	UNKNOWN	SYBR	None				29.6526	29.6402	1.82395							TRUE	0.0178418	TRUE	3	33	1	81.7698				Y	N	N	N
B5	24-1	CBF5	UNKNOWN	SYBR	None				34.6079	34.5654	0.0513792							TRUE	0.0178418	TRUE	3	24	1	82.3016				N	N	N	N
B6	24-1	CBF5	UNKNOWN	SYBR	None				34.5083	34.5654	0.0513792							TRUE	0.0178418	TRUE	3	25	1	82.3016				N	N	N	N
B7	24-1	CBF5	UNKNOWN	SYBR	None				34.5799	34.5654	0.0513792							TRUE	0.0178418	TRUE	3	25	1	82.3016				N	N	N	N
B8	12-1	CBF6	UNKNOWN	SYBR	None				28.1349	28.1554	0.0719377							TRUE	0.180209	TRUE	3	23	1	81.2381				N	N	N	N
B9	12-1	CBF6	UNKNOWN	SYBR	None				28.0958	28.1554	0.0719377							TRUE	0.180209	TRUE	3	23	1	81.0608				N	N	N	N
B10	12-1	CBF6	UNKNOWN	SYBR	None				28.2353	28.1554	0.0719377							TRUE	0.180209	TRUE	3	23	1	81.0608				N	N	N	N
C2	3-3	CBF5	UNKNOWN	SYBR	None				29.989	29.7813	0.11531							TRUE	0.0178418	TRUE	3	28	1	82.3016				N	N	N	N
C3	3-3	CBF5	UNKNOWN	SYBR	None				29.952	29.7813	0.11531							TRUE	0.0178418	TRUE	3	28	1	82.3016				N	N	N	N
C4	3-3	CBF5	UNKNOWN	SYBR	None				29.4028	29.7813	0.11531							TRUE	0.0178418	TRUE	3	28	1	82.4788				N	N	N	N
C5	24-2	CBF5	UNKNOWN	SYBR	None				34.1218	34.0763	0.192694							TRUE	0.0178418	TRUE	3	21	1	82.4788				N	N	N	N
C6	24-2	CBF5	UNKNOWN	SYBR	None				33.9879	34.0763	0.192694							TRUE	0.0178418	TRUE	3	21	1	82.6561				N	N	N	N
C7	24-2	CBF5	UNKNOWN	SYBR	None				34.1193	34.0763	0.192694							TRUE	0.0178418	TRUE	3	21	1	82.4788				N	N	N	N
C8	6-3	CBF6	UNKNOWN	SYBR	None				27.2526	27.4145	0.173468							TRUE	0.180209	TRUE	3	22	1	81.4153				N	N	N	N
C9	6-3	CBF6	UNKNOWN	SYBR	None				27.3933	27.4145	0.173468							TRUE	0.180209	TRUE	3	22	1	81.2381				N	N	N	N
C10	6-3	CBF6	UNKNOWN	SYBR	None				27.5976	27.4145	0.173468							TRUE	0.180209	TRUE	3	22	1	81.0608				N	N	N	N
D2	6-1	CBF5	UNKNOWN	SYBR	None				21.9553	29.7834	0.15423							TRUE	0.0178418	TRUE	3	20	1	82.6561				N	N	N	N
D3	6-1	CBF5	UNKNOWN	SYBR	None				21.7376	29.7834	0.15423							TRUE	0.0178418	TRUE	3	20	1	82.6561				N	N	N	N
D4	6-1	CBF5	UNKNOWN	SYBR	None				21.6572	29.7834	0.15423							TRUE	0.0178418	TRUE	3	20	1	82.8333				N	N	N	N
D5	24-3	CBF5	UNKNOWN	SYBR	None				34.1786	34.1138	0.171491							TRUE	0.0178418	TRUE	3	25	1	82.4788				N	N	N	N
D6	24-3	CBF5	UNKNOWN	SYBR	None				33.9194	34.1138	0.171491							TRUE	0.0178418	TRUE	3	25	1	82.6561				N	N	N	N
D7	24-3	CBF5	UNKNOWN	SYBR	None				34.2435	34.1138	0.171491							TRUE	0.0178418	TRUE	3	25	1	82.6561				N	N	N	N
D8	12-2	CBF6	UNKNOWN	SYBR	None				31.5506	31.8379	0.379886							TRUE	0.180209	TRUE	3	27	1	81.2381				N	N	N	N
D9	12-2	CBF6	UNKNOWN	SYBR	None				31.6946	31.8379	0.379886							TRUE	0.180209	TRUE	3	27	1	81.2381				N	N	N	N
D10	12-2	CBF6	UNKNOWN	SYBR	None				32.2686	31.8379	0.379886							TRUE	0.180209	TRUE	3	27	1	81.0608				N	N	N	N
E2	6-2	CBF5	UNKNOWN	SYBR	None				29.4664	29.1847	0.244894							TRUE	0.0178418	TRUE	3	19	1	82.6561				N	N	N	N
E3	6-2	CBF5	UNKNOWN	SYBR	None				29.0225	29.1847	0.244894							TRUE	0.0178418	TRUE	3	19	1	82.8333				N	N	N	N
E4	6-2	CBF5	UNKNOWN	SYBR	None				29.0651	29.1847	0.244894							TRUE	0.0178418	TRUE	3	19	1	82.8333				N	N	N	N
E5	3-1	CBF6	UNKNOWN	SYBR	None				28.5289	28.5259	0.0125689							TRUE	0.180209	TRUE	3	39	1	62.0952				N	Y	N	Y
E6	3-1	CBF6	UNKNOWN	SYBR	None				28.4923	28.5259	0.0125689							TRUE	0.180209	TRUE	3	39	1	62.2725				N	Y	N	Y
E7	3-1	CBF6	UNKNOWN	SYBR	None				28.5566	28.5259	0.0125689							TRUE	0.180209	TRUE	3	39	1	62.0952				N	Y	N	Y
E8	12-3	CBF6	UNKNOWN	SYBR	None				34.2962	32.2686	1.21659							TRUE	0.180209	TRUE	3	29	1	81.2381				Y	N	N	N
E9	12-3	CBF6	UNKNOWN	SYBR	None				35.9477	32.2686	1.21659							TRUE	0.180209	TRUE	3	31	1	81.0608				Y	N	N	N
E10	12-3	CBF6	UNKNOWN	SYBR	None				36.6694	32.2686	1.21659							TRUE	0.180209	TRUE	3	32	1	80.8836				Y	N	N	N
F2	6-3	CBF5	UNKNOWN	SYBR	None				29.7309	29.682	0.0460389							TRUE	0.0178418	TRUE	3	21	1	82.6561				N	N	N	N
F3	6-3	CBF5	UNKNOWN	SYBR	None				29.6755	29.682	0.0460389							TRUE	0.0178418	TRUE	3	21	1	82.8333				N	N	N	N
F4	6-3	CBF5	UNKNOWN	SYBR	None				29.6395	29.682	0.0460389							TRUE	0.0178418	TRUE	3	21	1	82.8333				N	N	N	N
F5	3-2	CBF6	UNKNOWN	SYBR	None				28.026	28.034	0.710174							TRUE	0.180209	TRUE	3	30	1	81.2381				Y	N	N	N
F6	3-2	CBF6	UNKNOWN	SYBR	None				28.0304	28.034	0.710174							TRUE	0.180209	TRUE	3	31	1	81.2381				Y	N	N	N
F7	3-2	CBF6	UNKNOWN	SYBR	None				28.0457	28.034	0.710174							TRUE	0.180209	TRUE	3	39	1	62.0952				N	Y	N	Y
F8	24-1	CBF6	UNKNOWN	SYBR	None				32.1417	32.4382	0.614751							TRUE	0.180209	TRUE	3	27	1	81.0608				Y	N	N	N
F9	24-1	CBF6	UNKNOWN	SYBR	None				32.028	32.4382	0.614751							TRUE	0.180209	TRUE	3	27	1	81.0608				Y	N	N	N
F10	24-1	CBF6	UNKNOWN	SYBR	None				33.1451	32.4382	0.614751							TRUE	0.180209	TRUE	3	28	1	80.8836				Y	N	N	N
G2	12-1	CBF5	UNKNOWN	SYBR	None				27.1982	27.244	0.226641							TRUE	0.0178418	TRUE	3	21	1	82.3016				N	N	N	N
G3	12-1	CBF5	UNKNOWN	SYBR	None				27.2709	27.244	0.226641							TRUE	0.0178418	TRUE	3	21	1	82.3016				N	N	N	N
G4	12-1	CBF5	UNKNOWN	SYBR	None				27.263	27.244	0.226641							TRUE	0.0178418	TRUE	3	21	1	82.4788				N	N	N	N
G5	3-3	CBF6	UNKNOWN	SYBR	None				28.0982	28.0918	1.64438							TRUE	0.180209	TRUE	3	28	1	81.0608				Y	N	Y	N
G6	3-3	CBF6	UNKNOWN	SYBR	None				28.0868	28.0918	1.64438							TRUE	0.180209	TRUE	3	31	1	81.0608				Y	N	N	N
G7	3-3	CBF6	UNKNOWN	SYBR	None				28.0906	28.0918	1.64438							TRUE	0.180209	TRUE	3	31	1	81.0608				Y	N	N	N
G8	24-2	CBF6	UNKNOWN	SYBR	None				31.7729	31.7426	0.228601							TRUE	0.180209	TRUE	3	22	1	81.0608				N	N	N	N
G9	24-2	CBF6	UNKNOWN	SYBR	None				31.693	31.7426	0.228601							TRUE	0.180209	TRUE	3	23	1	81.0608				N	N	N	N
G10	24-2	CBF6	UNKNOWN	SYBR	None				31.762	31.7426	0.228601							TRUE	0.180209	TRUE	3	23	1	80.8836				N	N	N	N
H2	12-2	CBF5	UNKNOWN	SYBR	None				31.5289	31.0416	0.42205							TRUE	0.0178418	TRUE	3	25	1	81.9471				N	N	Y	N
H3	12-2	CBF5	UNKNOWN	SYBR	None				30.7939	31.0416	0.42205							TRUE	0.0178418	TRUE	3	25	1	82.1243				N	N	N	N
H4	12-2	CBF5	UNKNOWN	SYBR	None				30.802	31.0416	0.42205							TRUE	0.0178418	TRUE	3	25	1	82.1243				N	N	N	N
H5	6-1	CBF6	UNKNOWN	SYBR	None				27.0911	27.2145	0.145513							TRUE	0.180209	TRUE	3	22	1	81.0608				N	N	N	N
H6	6-1	CBF6	UNKNOWN	SYBR	None				27.1775	27.2145	0.145513							TRUE	0.180209	TRUE	3	22	1	81.0608				N	N	N	N
H7	6-1	CBF6	UNKNOWN	SYBR	None				27.3749	27.2145	0.145513							TRUE	0.180209	TRUE	3	22	1	81.0608				N	N	N	N
H8	24-3	CBF6	UNKNOWN	SYBR	None				31.2536	31.4599	0.251903							TRUE	0.180209	TRUE	3	26	1	80.8836				N	N	N	N
H9	24-3	CBF6	UNKNOWN	SYBR	None				31.3853	31.4599	0.251903							TRUE	0.180209	TRUE	3	26	1	80.7064				N	N	N	N
H10	24-3	CBF6	UNKNOWN	SYBR	None				31.7406	31.4599	0.251903							TRUE	0.180209	TRUE	3	27	1	80.7064				N	N	N	N
Analysis Type	Singleplex
Endogenous Control	CBF5
RQ Min/Max Confidence Level	95.0
Reference Sample	3-1

## Sheet: Raw Data
Block Type	96alum
Chemistry	SYBR_GREEN
Experiment File Name	D:\HAIFENG\CBF56Untitled.eds
Experiment Run End Time	2013-01-10 07:57:55 AM CST
Instrument Type	sds7500
Passive Reference	ROX
Well	Cycle	1	2	3	4	5
A1	1	40941.5	5030.52	3252.59	3788.93	1780.52
A2	1	332387	76043	55499.1	441839	2562.99
A3	1	215605	51687.4	41993.9	338795	1882.28
A4	1	213141	48553.8	44106.2	335158	1415.99
A5	1	213308	56923.9	43945.8	310016	1964.43
A6	1	189257	45012.2	45269.9	331185	1424.05
A7	1	245847	53957.5	54057.3	383108	2344.7
A8	1	243738	57953.9	51450.1	370421	2241.63
A9	1	324865	76269.7	67198.8	492123	2962.22
A10	1	415698	95207.9	74925	548824	4016.7
A11	1	0	0	0	0	0
A12	1	0	344.613	124.915	465.66	425.61
B1	1	0	0	0	79.2216	267.762
B2	1	349856	79898.1	64293.9	488152	3314.3
B3	1	227249	53915.7	50801.4	382561	1835.05
B4	1	199189	47543.9	46376.6	338425	8372.69
B5	1	177512	43189	44049.7	305984	1933.81
B6	1	199791	50047.1	50114.3	337062	2377.02
B7	1	242334	54404.4	56055	373518	2500.32
B8	1	267773	63955.7	57646.2	386343	2212.35
B9	1	300440	71247.7	63027.8	436843	2257.11
B10	1	426526	99395.6	79570.7	546927	3826.12
B11	1	0	0	21.4656	256.952	0
B12	1	0	0	0	0	267.575
C1	1	2190.24	562.546	613.887	439.604	276.583
C2	1	363951	85604.3	68841.9	494830	3200.05
C3	1	233478	57476	54210.3	385123	2399.18
C4	1	193487	46652.8	47096.2	324660	2076.58
C5	1	173238	40443	46478.9	309570	2202.76
C6	1	230100	60105.3	56409.4	362310	2171.18
C7	1	249589	56195.5	63737	409254	2717.82
C8	1	270357	65337.2	59884.6	382786	2365.35
C9	1	297823	73478.8	65017.8	425874	1916.74
C10	1	424659	102084	81176.7	535177	3627.04
C11	1	1003.31	448.654	217.419	646.594	536.151
C12	1	0	54.4063	0	425.886	0
D1	1	30200	6462.2	5203.43	6591.56	4073.15
D2	1	377117	89758.2	73777.6	510450	3434.91
D3	1	267893	68580.8	61902.7	415654	2283
D4	1	233663	59264.5	57982.7	376689	1791.37
D5	1	224138	54771.3	60670	380810	2364.84
D6	1	228300	55066.3	63724.7	394056	2285.71
D7	1	307594	73092.9	80380.8	479119	3854.9
D8	1	269696	66383	64512.1	392089	2466.97
D9	1	288883	72283.5	68662	430928	2799.31
D10	1	442053	106843	90088	574758	3414.38
D11	1	15939.4	4656.79	4635.97	7183.09	3336.92
D12	1	9002.26	918.099	717.551	1246	380.557
E1	1	4316.63	1004.47	496.097	642.394	281.567
E2	1	426010	107139	82308.7	552421	3972.68
E3	1	310015	80648.7	73244.5	476436	2398.67
E4	1	271237	68532	67859.4	420248	2880.25
E5	1	258199	60957	64012.1	392195	2890.57
E6	1	273574	65841.3	68217.7	404667	3088.33
E7	1	323909	78816.3	76266.5	443381	3227.35
E8	1	305230	75775	74882.3	447136	3232.12
E9	1	333524	84676.9	79732.4	489843	2940.63
E10	1	437766	108167	91151.4	574588	3751.33
E11	1	18350.5	2749.69	1894.77	2604.81	1491.05
E12	1	5818.28	1075.48	1023.37	2473.23	2791.63
F1	1	45208.3	8169.78	5677.86	7445.59	4143.56
F2	1	451078	111622	87726.7	589552	3756.7
F3	1	307207	79131.9	76796.5	496710	2519.82
F4	1	270192	66284.3	68280.5	428529	3083.57
F5	1	335112	80518.6	77477.8	479771	2844.53
F6	1	306460	75147.2	72425	432962	2680.23
F7	1	372267	92175.3	85807.8	500444	3410.17
F8	1	379190	114853	86708.2	497475	5015.62
F9	1	396609	101700	95540	593136	3442.54
F10	1	503471	126669	102492	646438	3790.23
F11	1	17663	2770.59	1864.79	2602.6	0
F12	1	0	0	0	0	251.826
G1	1	14438.5	4643.95	4748.76	10467.8	14304.3
G2	1	490668	124598	88644.8	599065	3692.94
G3	1	358811	92989.6	82933.7	561701	2757.8
G4	1	332588	85806.6	77588	495444	3086.72
G5	1	324600	79125.6	71766.8	447279	2515.71
G6	1	335951	81713.9	75969.6	459082	3299.79
G7	1	395385	98007.1	85996.1	513439	5107.56
G8	1	383103	96944.6	85572.8	519232	3131.88
G9	1	426514	112338	96041.2	603490	3595.35
G10	1	484276	124107	97780.9	636892	3395.81
G11	1	10749.1	2921.09	2565.29	3921.14	3278.16
G12	1	82267.1	16395.4	13472.3	17940.6	10126.2
H1	1	28571.7	5090.58	3825.77	5932.66	6666.52
H2	1	496630	127645	91147.1	654488	3744.64
H3	1	367617	99650.6	83243.2	585578	3000.08
H4	1	307206	78747.7	69047.2	460689	2970.49
H5	1	349352	89093.4	80425.1	520200	3032.67
H6	1	415727	100147	89499.2	561612	3568.87
H7	1	440297	110543	95220.5	601736	3541.15
H8	1	433287	108118	92908.7	592834	4129.96
H9	1	405925	106478	87089	574935	3339.36
H10	1	546242	138124	103594	693036	4525.69
H11	1	11362.4	1424.27	553.503	1664.42	1011.19
H12	1	20957.7	3460.98	1771.75	3992.94	3592.44
A1	2	41293.6	5035.45	2951.86	3775.3	1273.46
A2	2	332043	76526.8	55294.7	441609	3069.43
A3	2	215446	51640.8	42038.5	338097	1420.29
A4	2	213602	48742.1	43987.7	334165	1636.23
A5	2	213238	56855.8	43682.9	307980	1864.79
A6	2	189467	45031.7	45197.4	329503	1332.54
A7	2	245842	54240	54024.3	382422	2221.64
A8	2	242390	58119.6	51306.8	368431	2161.1
A9	2	321813	76083.1	66664.9	487013	2881.25
A10	2	412420	94409.5	74809.4	546647	4404.18
A11	2	0	0	0	0	0
A12	2	0	180.806	197.309	705.545	368.954
B1	2	0	0	0	0	0
B2	2	351745	80076.9	64588.6	489109	3077.17
B3	2	228113	54325.3	50782.1	383319	1979.23
B4	2	200417	47773.2	46530.2	338560	8960.82
B5	2	178116	43535.7	44086	305345	2063.57
B6	2	199758	50030.9	50263.2	335252	2257.56
B7	2	243437	55116.9	55960.7	372717	2452.15
B8	2	267333	64068	57766.2	385971	2318.96
B9	2	298011	70959.5	62973.5	435129	1979.49
B10	2	425041	98757.8	79563.5	547092	3815.35
B11	2	0	0	123.683	190.937	98.5306
B12	2	0	5.89985	0	0	0
C1	2	2132.42	801.045	688.187	547.643	419.178
C2	2	364559	85761.2	68906	495658	3833.01
C3	2	234211	57658.4	54230	385444	2297.11
C4	2	193550	47008.4	47114.7	323947	2148.86
C5	2	173581	40931.7	46509.3	308224	2167.85
C6	2	229991	60037.8	56175	361867	2385.57
C7	2	250706	56647.8	63764.1	409529	2825.32
C8	2	269534	65157.6	60050.1	382870	2269.68
C9	2	297076	73624	64981.2	426177	2002.7
C10	2	424259	102206	81594	536645	3732.24
C11	2	1107.13	357.317	312.037	711.456	552.491
C12	2	0	0	0	460.001	322.927
D1	2	29959.6	6596.7	5222.52	6898.37	4831.09
D2	2	377991	89884.8	73912.7	511623	3232.62
D3	2	268718	68784.5	62065.1	416177	2584.15
D4	2	233751	59450.8	57833.6	375266	2241.44
D5	2	225335	55570.7	60635.6	379784	2783.53
D6	2	227660	55322.1	63614.4	392467	2226.22
D7	2	309461	73756.7	80460.5	477854	3407.91
D8	2	270821	67028.5	64532.1	392271	2156.72
D9	2	289802	72693	68941.9	431585	2740.29
D10	2	441962	106749	90272.1	576979	3644.42
D11	2	16179.7	4772.62	4686.22	6789.4	3093.27
D12	2	9041.6	1204.8	670.93	1134.44	347.938
E1	2	3745.23	1147.96	470.827	486.247	356.743
E2	2	428658	107441	82640.1	554073	3920.3
E3	2	311265	81106.5	73481	476879	2492.31
E4	2	272652	69070.5	68121.1	420859	2680.53
E5	2	258991	61376.5	64237.3	391794	3031.95
E6	2	273549	65805.4	68050.3	403796	2897.87
E7	2	324972	79524.8	76497.6	442583	3214.67
E8	2	305710	76571.5	75204	448284	3204.65
E9	2	334418	85030.8	79890.1	491471	2844.23
E10	2	438909	108288	91627	577372	3792.62
E11	2	18182.8	2830.51	2005.9	2566.75	1383.39
E12	2	5827.23	1275.03	1001.83	2537.68	2539.03
F1	2	45361.1	8131.57	5930.38	6807.44	4171.74
F2	2	453638	112616	88283.1	590748	3847.98
F3	2	307998	79177.2	77064.6	496666	2992.28
F4	2	272308	67162.6	68556.2	429529	3103.11
F5	2	336233	80959.4	77505.1	478668	2705.2
F6	2	305148	75345.6	72109.3	431173	2643.3
F7	2	372453	92332.5	85651.1	499194	3326.02
F8	2	380620	115376	87190.2	498456	4671.53
F9	2	398069	102675	95938.4	593109	3244.1
F10	2	506242	126856	103200	650747	3898.95
F11	2	17838.2	2770.59	1937.47	2733.03	0
F12	2	0	0	0	0	124.624
G1	2	14887.1	4482.56	4917.64	10415.1	13551.7
G2	2	494212	125761	88702.2	600444	4175.11
G3	2	360421	93759.2	83122.7	562473	2424.44
G4	2	335677	86788.4	77829.4	496496	3016.64
G5	2	325615	79985.8	71810.7	447423	2544.5
G6	2	336397	82552.5	75816.2	458922	3089.61
G7	2	398121	99274.8	86162.2	514380	5140.25
G8	2	383991	97486.6	85818.9	519632	3174.64
G9	2	426991	112480	96244.2	604733	3445.21
G10	2	484314	123577	97808	637406	3597.69
G11	2	11074.4	2951.69	2818.64	4099.54	3011.02
G12	2	82033.3	16388.3	13195.7	17978.1	10324.9
H1	2	28088	5361.62	3919.66	5960.29	6285.97
H2	2	495141	127928	90711.7	650897	3699.99
H3	2	370241	100385	83686.6	585347	3076.12
H4	2	309191	79511.7	69086.5	460756	3146.39
H5	2	349948	89765.5	80419.1	519635	3340.85
H6	2	416491	100863	89471.7	561458	3500.94
H7	2	441190	111237	95460.9	602149	3576.91
H8	2	433550	108753	92869.8	592771	3804.35
H9	2	405220	106955	87026.2	573549	3907.87
H10	2	544822	138099	103432	692706	5529.61
H11	2	11154.3	1267.13	503.915	1592.22	1206.51
H12	2	19610.2	2975.59	1563.53	4314.06	3960.9
A1	3	42047.6	5255.38	3114.94	4043.34	1818.4
A2	3	333386	76593.3	55493.6	440146	2758.35
A3	3	214725	51297.7	41934	336189	1708.66
A4	3	213271	48790.9	43825	332393	1628.43
A5	3	213615	56943.4	43506.5	307193	2158.85
A6	3	189291	45476	44968.8	328641	1290.8
A7	3	245529	54479.7	53809.6	381264	2343.09
A8	3	241584	58122.9	50976.3	366778	2364.5
A9	3	321076	76245.9	66620	485929	2739.55
A10	3	410614	94011.8	74443.5	544354	4233.09
A11	3	0	0	0	0	0
A12	3	0	295.162	41.1652	1024.45	704.744
B1	3	0	0	0	76.4898	0
B2	3	353053	80760.5	64455.6	489976	3607.94
B3	3	228898	54775.2	50816.7	383536	2034.15
B4	3	201089	48289.7	46575.1	338425	9397.18
B5	3	178482	43974	44071.7	305055	2011.33
B6	3	199553	50219.4	50072.7	335238	2354.42
B7	3	244131	54986.1	55903.1	372414	2637.95
B8	3	266686	64311.5	57690.1	385589	2480.45
B9	3	296932	71126.4	62617.5	433332	2250.54
B10	3	422912	98568.5	79450.1	545824	3766.86
B11	3	0	0	47.0198	225.468	0
B12	3	0	136.877	0	0	0
C1	3	2078.64	631.245	863.583	726.465	433.929
C2	3	366190	85922.5	68894.4	496497	3702.49
C3	3	235196	57894.8	54387.6	385461	2423.53
C4	3	194451	47254.7	47050.6	323351	2474.12
C5	3	174631	41378.9	46386.8	308007	2183.96
C6	3	230546	60301	56291.4	361723	2803.11
C7	3	251959	57169.2	63879.5	408863	2734.23
C8	3	269599	65501.9	60025.6	382215	2302.67
C9	3	297199	73931.2	64931.5	426137	2176.27
C10	3	424991	102349	81544.1	537550	3627.04
C11	3	1088.63	551.031	320.089	365.863	809.843
C12	3	0	0	0	325.742	146.086
D1	3	30909.6	6330.16	5251.17	6740.06	4644.99
D2	3	378705	89969.2	73756.3	511418	3295.02
D3	3	269548	69266	62147.3	415828	2484.44
D4	3	234913	59914.1	57961.4	375002	1732.15
D5	3	226465	56205.4	60814.4	379312	2199.38
D6	3	228016	55553.6	63599.2	391424	2415.26
D7	3	310438	74464	80358.5	477655	3465.87
D8	3	271209	67184.8	64490.4	391962	2241.18
D9	3	291289	73264.9	69138.9	431808	2666.94
D10	3	443309	107244	90419.1	577157	3747.53
D11	3	16030.8	4682.31	4620.51	7002.49	3351.37
D12	3	9170.53	1133.93	759.104	1213.42	307.411
E1	3	4015.37	960.734	379.056	861.548	103.879
E2	3	430226	107960	82645.7	555450	4028.47
E3	3	312334	81756.2	73686.5	477393	2835.29
E4	3	274291	69333.9	68295.6	420926	2763.56
E5	3	258481	61486.2	64182.3	391341	3222.14
E6	3	273241	66488.1	68166.1	403685	2846.11
E7	3	325032	80061.4	76375.6	442224	3110.24
E8	3	306983	76999.2	75466.2	448949	2899.45
E9	3	335985	85588.6	80252	492395	2891.05
E10	3	440425	108955	91856.8	577702	4031.34
E11	3	18429.7	2714.92	2027.76	2662.34	1551.16
E12	3	5565.97	1218.52	1110.38	2516.73	2521.16
F1	3	45285.5	8075.84	6071	6920.92	3875.13
F2	3	456778	113244	88248.9	592430	4005.97
F3	3	308050	79635.1	77059.3	495942	2909.89
F4	3	273695	67941.3	68870.3	429492	2884.1
F5	3	336580	81928.1	77449.4	478844	2814.52
F6	3	304848	75663.9	71809.4	430052	2617.8
F7	3	373308	93168	85931.4	499086	3437.91
F8	3	381551	116159	87292.2	499248	4763.62
F9	3	399281	103058	96120.4	592672	3397.24
F10	3	507885	128277	103063	651911	4031.12
F11	3	17509.2	2781.35	1849.21	2511.6	88.8722
F12	3	0	0	0	0	315.427
G1	3	15024.8	4024.75	4849.47	10624.4	14010.8
G2	3	497183	126586	89314.8	601003	3916.23
G3	3	361196	94470.8	83141.6	562069	2564.6
G4	3	337780	87942.2	78115.1	497136	2943.59
G5	3	326078	80697.4	71897.4	447279	2962.82
G6	3	337265	82949.9	75765.1	458164	3063.69
G7	3	399482	100320	86435.4	515526	5496.14
G8	3	384791	98155.4	85605.6	519273	3458.38
G9	3	427244	113121	96170.5	601998	3731.29
G10	3	484311	124196	97911.2	636994	3295.42
G11	3	11040.5	3107.25	2615.47	3646.87	2192.69
G12	3	82194.1	16222.3	13099.2	17986.8	9915.22
H1	3	27890.2	5306.27	4040.87	5951.66	6756.56
H2	3	495725	128218	90423	646019	3784.71
H3	3	369894	100424	83219.1	583856	3029.78
H4	3	309644	80132	69013.5	459249	2975.19
H5	3	349308	89735.5	80157.2	517410	3184.8
H6	3	417468	101381	89393.6	559984	3643.05
H7	3	441123	111823	94881.2	598626	3718.01
H8	3	432562	108821	92710.4	589754	4085.44
H9	3	405299	106873	86747.8	570504	3719.44
H10	3	544780	138004	103419	689373	4977.64
H11	3	11088.4	1621.42	568.245	1403.72	1294.21
H12	3	19862.7	3081.64	1961.38	3888.34	3496.78
A1	4	41628.5	5376.83	2875.56	3794.99	1678.52
A2	4	333769	76712.5	55295.8	439841	3022.72
A3	4	215321	51366.1	41806.1	335810	1795.96
A4	4	213486	49338.1	43687.1	331513	1527.84
A5	4	213931	56940.9	43543.3	306608	2044.63
A6	4	189862	45559.9	44944.9	327796	1190.45
A7	4	246503	54769.2	53910.1	381063	2238.53
A8	4	241444	58368.5	51042.6	366080	2208.42
A9	4	321804	76617.2	66499.4	485964	2735.7
A10	4	411050	94602.8	74486.4	544157	4273.34
A11	4	0	0	0	0	0
A12	4	0	292.071	53.9406	500.937	63.5651
B1	4	0	0	0	35.5131	298.402
B2	4	354685	81094.7	64784.6	490796	3465
B3	4	230112	55243.3	50980.4	384177	2097.91
B4	4	201674	48527.6	46506.9	338358	9260.93
B5	4	179806	44118.4	43939.9	304613	2029.87
B6	4	200219	50543.8	50052.6	335279	2431.1
B7	4	245167	55644.7	55930.1	373026	2433.79
B8	4	267493	64604.4	57778.8	385499	2518.63
B9	4	297386	71443.9	62798.4	433697	2169.22
B10	4	423761	99029.6	79560	546313	4131.42
B11	4	0	0	118.572	181.796	0
B12	4	0	0	0	0	48.1411
C1	4	2438.98	728.459	594.399	782.347	635.527
C2	4	367143	86515.4	69085.5	497353	3817.48
C3	4	236212	58611.5	54431.7	385983	2310.22
C4	4	195258	47643.3	46943.7	323646	2235.79
C5	4	174805	41197.3	46569.2	308225	2235.88
C6	4	230911	60803.2	56480	362065	2465.06
C7	4	253206	57644.2	63925.6	409124	3063.29
C8	4	270127	66230	59821.8	382564	2291.12
C9	4	298120	74256.7	64988.5	425767	2244.05
C10	4	425810	102876	81848.7	538278	3712.24
C11	4	954.993	371.369	127.834	734.766	319.648
C12	4	0	0	0	250.909	150.479
D1	4	30415.8	6599.16	5238.04	6879.96	5007.32
D2	4	379033	90370.7	73808.1	511732	3244.7
D3	4	270713	69727.7	62422	416172	2355.23
D4	4	235272	60489.2	58105.6	375591	2207.88
D5	4	227258	56331.4	60717.1	379555	2766.38
D6	4	228870	55854.3	63662.9	391459	2264.6
D7	4	311241	74744.5	80343.9	478316	3538.57
D8	4	272231	67806.1	64712.3	392709	2553.11
D9	4	292279	73971.9	69205.1	432476	2729.33
D10	4	444230	107606	90937.7	577578	3596.82
D11	4	15910.6	4738.26	4674.62	6846.73	3232.92
D12	4	9063.45	1286.41	727.686	1103.83	521.907
E1	4	3806.04	732.508	626.439	817.717	274.733
E2	4	432114	108958	83054.2	555941	4448.63
E3	4	313978	82398.6	73791.4	477477	2875.57
E4	4	275427	69948.5	68038.3	421793	2634.53
E5	4	258459	61554.8	64166.3	391741	2909.89
E6	4	274300	67181	68250.8	403806	3297.34
E7	4	325947	80775.5	76423.8	442666	3188.32
E8	4	308251	77456.3	75490.5	448976	3117.16
E9	4	337116	86032.6	80599.3	493603	2799.24
E10	4	441390	109685	92248.9	580012	3992.75
E11	4	18444.6	2648.2	2004.08	2588.88	1419.28
E12	4	5661.71	1267.97	1087.18	2360.45	2478.93
F1	4	45758.3	7980.31	6216.16	6792.7	4223.64
F2	4	458368	114337	88653.3	593244	3726.27
F3	4	309589	80241.4	77118.9	495939	2865.04
F4	4	274837	68569.2	69000.1	430363	3165.83
F5	4	337696	82571.6	77604.8	478441	2957.07
F6	4	305622	76348.5	72047.2	430196	2834.12
F7	4	374013	93906.7	85843.6	499236	3333.67
F8	4	383271	116812	87379.2	499906	4916.44
F9	4	400592	104099	96165.4	593924	3249.49
F10	4	510785	129462	103792	653287	4447.88
F11	4	17373.5	2851.26	1839.87	2471.15	0
F12	4	0	0	0	0	374.731
G1	4	14846.3	4426.57	5049.33	10511.2	14146.2
G2	4	500246	127506	89390.9	602167	4100.27
G3	4	363409	94988.9	83294.1	563116	2247.66
G4	4	339242	88873.3	78109.2	498497	2750.12
G5	4	327061	81192.8	71897.4	447397	2801.63
G6	4	337756	83459.5	75997	458539	3080.36
G7	4	400552	101127	86617.1	516285	5303.72
G8	4	385578	98810	85814.1	519540	3551.67
G9	4	428493	113705	96097.8	602713	4026.51
G10	4	485327	124449	98250.1	637730	3288.88
G11	4	11434.8	2838.22	2568.97	3944.2	2907.07
G12	4	82238.8	16203.8	13455.3	18189.1	10679
H1	4	28499.8	5044.77	3707.97	5982.74	5920.7
H2	4	496021	128375	89967.8	642634	3868.28
H3	4	370638	101126	83279.2	582736	3137.9
H4	4	310259	80417.6	68918.8	458332	2907.47
H5	4	349721	90190.2	79938.3	515964	3096.47
H6	4	416697	101878	89253.4	558894	3668.08
H7	4	441883	112346	94794.6	597244	3718.01
H8	4	432975	109557	92803.1	588458	4212.53
H9	4	405389	107423	86662.7	569874	3886.46
H10	4	544650	138589	103230	688297	5125.82
H11	4	11196.8	1312.85	572.265	1439.82	1158.68
H12	4	19911.9	3285.59	1695.53	4367.28	3890.04
A1	5	41303.2	4994.42	2996.75	3761.67	1596.93
A2	5	335071	77160.7	55444.4	439892	2820.99
A3	5	216020	51592.1	41873.1	336055	1427.16
A4	5	214764	49896.9	43749.9	331591	1589.41
A5	5	214233	57166.4	43458.4	306606	1709.26
A6	5	189886	45897.9	44912.3	327366	1414.42
A7	5	247320	55125.3	53901.3	380528	2097.77
A8	5	241796	58816.9	50940.7	365845	2330.46
A9	5	322579	77151.3	66641	486057	2914.03
A10	5	410674	94731.3	74533.2	544750	4063
A11	5	0	0	0	0	0
A12	5	167.395	193.169	0	767.633	279.134
B1	5	0	0	0	241.763	158.526
B2	5	355834	81717.6	65005.9	491508	3648.94
B3	5	230942	55860.6	51150.2	384511	2043.96
B4	5	202254	48993.1	46450.8	337991	9462.72
B5	5	179972	44581.5	44075	304675	2174.8
B6	5	200814	50900.7	50200	334631	2274.51
B7	5	246291	56190	55979.4	372650	2614.25
B8	5	267591	64893.5	57937.3	385320	2365.1
B9	5	298418	72031.7	62846.1	434224	2266.96
B10	5	423504	99506.8	79648.4	547050	3992.24
B11	5	0	135.572	114.483	276.249	0
B12	5	0	0	0	0	8.95648
C1	5	1772.09	639.022	578.564	692.936	458.514
C2	5	368482	87269.5	69205.2	497349	3940.75
C3	5	236849	59005.2	54590.3	385705	2540.58
C4	5	195890	48177.3	46951.4	323446	2387.18
C5	5	175308	41782.9	46429.8	308046	1952.14
C6	5	231642	61095.1	56412.6	362232	2400.02
C7	5	254148	58010	63938.4	409347	3047.7
C8	5	271233	66601.1	60007.7	382508	2330.71
C9	5	298569	75010.8	65244.1	426457	2095.27
C10	5	427138	103645	82171.4	539013	3784.4
C11	5	807.992	459.695	378.47	749.968	786.355
C12	5	0	67.1396	0	276.22	0
D1	5	30576.1	6421.48	5224.91	7034.6	4812.6
D2	5	380004	90609.5	73766.5	512400	3427.87
D3	5	271988	70547.3	62498.2	417124	2354.22
D4	5	236510	61303.3	57914.9	375794	1487.38
D5	5	228067	56802.3	60604.2	379653	2372.91
D6	5	230033	56595.6	63658.1	392063	2690.66
D7	5	312433	75701.7	80332.3	477752	3905.98
D8	5	273258	68139	64835.8	392405	2220.28
D9	5	293511	74446.6	69405.4	432894	2692.23
D10	5	445873	108784	90975.8	579179	3610.04
D11	5	16083.4	4912.01	4657.23	7106.65	3282.99
D12	5	8969.48	986.822	811.805	1233.17	365.73
E1	5	4272.78	1090.56	575.899	568.43	538.531
E2	5	434565	110188	83376.8	557707	4159.42
E3	5	315454	83254	74058.9	478098	2650.19
E4	5	276235	70854	68456.9	421152	2624.43
E5	5	257657	61777	64256.3	391653	2982.11
E6	5	274316	67442.6	68105.8	403860	2849.04
E7	5	327109	81485	76552.6	442482	3053.64
E8	5	309436	78240.1	75583.2	449492	3156.84
E9	5	337773	86652.3	80565.6	493877	2908.49
E10	5	442472	110299	92197.5	579348	3724.41
E11	5	18453.9	2653.83	1948.51	2597.73	1457.86
E12	5	5899.7	1179.67	1044.92	2639.19	2584.52
F1	5	45351.7	8047.18	6058.9	6839.86	3642.3
F2	5	460319	115005	88617.9	593653	4218.97
F3	5	310632	80940.4	77024.2	495926	2751.35
F4	5	276148	69435.6	69139.9	431451	2806.99
F5	5	338405	83266.7	77731.9	478197	2771.65
F6	5	306004	76741	71915.2	429664	2693.42
F7	5	374667	94721.2	85872	499183	3385.31
F8	5	384145	117257	87540.2	500082	4882.03
F9	5	402522	104618	96323.9	594457	3569.8
F10	5	512615	130455	103971	656433	3957.58
F11	5	17420.5	2695.3	1847.14	2668.32	0
F12	5	0	0	0	0	342.931
G1	5	14662.8	4383.75	5061.73	10491.1	13843.7
G2	5	502311	128645	89657.9	602612	4241.36
G3	5	364965	96245.2	83319.3	563572	2506.52
G4	5	340848	89501.5	78324	499568	2744.19
G5	5	326720	81673.2	71947	447464	2664.43
G6	5	338448	84085.5	76069.1	458109	3011.84
G7	5	400855	101841	86640.2	516126	5390.59
G8	5	387271	99863.7	85924.1	519516	3550.7
G9	5	430219	114861	96353.3	603679	3414.77
G10	5	486632	125861	98103.4	638447	3618.42
G11	5	11381.4	2729.84	2611.8	3882.31	2410.27
G12	5	82419.1	16426.9	13267.5	17925.7	10487.7
H1	5	28525.7	5355.9	3878.69	6048.37	6469.45
H2	5	497084	128576	89924.8	641226	3864.84
H3	5	372217	101884	83455.9	582520	2912.16
H4	5	310803	80789.2	68957.2	457942	3178.37
H5	5	350148	90617.9	80017.3	515255	2778.48
H6	5	417296	102487	89112.4	557387	3761.03
H7	5	441971	112931	94703.3	594510	3753.77
H8	5	433647	109951	92537.2	588046	4089.15
H9	5	405969	107717	86756.3	569266	3663.76
H10	5	545251	138900	102885	687195	5374.02
H11	5	11475.3	1338.56	560.204	1413.08	1350.02
H12	5	20349.9	3371.24	1992.99	4062.67	4536.61
A1	6	41613.2	5242.25	2969.82	3791.96	1678.52
A2	6	336188	77672	55428	439390	2990.87
A3	6	215981	52035.8	41848.8	336107	1662.56
A4	6	214963	49961.7	43847.1	331240	1442
A5	6	213996	57430.1	43401.2	306269	1894.77
A6	6	190853	46143.4	44959.3	327343	1326.12
A7	6	248269	55690.1	54116	381140	2392.16
A8	6	242375	59079.8	50871.1	365375	2298.08
A9	6	322614	77408.3	66695.6	485696	3211.89
A10	6	411802	95159.3	74626.9	544430	3862.72
A11	6	0	0	0	0	0
A12	6	0	332.25	0	599.713	339.935
B1	6	0	0	0	0	0
B2	6	356999	82179.2	64782.3	491827	3210.14
B3	6	231626	56373.1	51213.2	385036	2128.31
B4	6	202863	49393.2	46635.5	337787	9384.25
B5	6	180343	45057.7	44178.1	304629	2379.56
B6	6	201001	50993.4	50114.3	334874	2481.14
B7	6	246562	56431.4	56079.6	373259	2577.54
B8	6	267850	65300.9	57882.4	385422	2462.95
B9	6	299154	72476.2	63064	434250	2321.17
B10	6	424882	100137	79777	548295	3833.31
B11	6	0	0	18.3991	263.046	0
B12	6	0	0	0	0	0
C1	6	1915.96	772.529	762.487	366.337	366.319
C2	6	369316	87688	69490.7	497535	4180.06
C3	6	237950	59146.7	54713.2	385841	2319.58
C4	6	196659	48458.5	47180.8	323547	1986.72
C5	6	175884	41734.4	46383.3	307827	2338.81
C6	6	231794	61364.5	56481.6	362092	2593.53
C7	6	254396	58334	64064.1	409286	3055.08
C8	6	271077	67170.1	60055	382547	2415.66
C9	6	299438	75202.1	65231.9	426393	2020.88
C10	6	428446	104192	82235.9	538866	3741.8
C11	6	1193.48	499.843	181.183	434.779	767.972
C12	6	0	0	0	323.541	0
D1	6	30105.6	6377.05	5124.64	6867.69	4726.33
D2	6	381370	91161.3	74004	512800	3372.51
D3	6	273143	70874.6	62473.1	417076	2672.66
D4	6	237686	61784.8	58323.3	376907	2054.9
D5	6	228854	57358.8	60962.8	379467	2805.72
D6	6	231103	56823.6	63701.9	391954	2317.38
D7	6	313774	75946.1	80618.8	477608	3758.62
D8	6	273842	68680	64754	392428	2212.75
D9	6	294066	74799.3	69465.7	433332	2870.14
D10	6	447370	108916	91055.4	579842	3736.96
D11	6	15844.1	4941.46	4585.73	6991.98	3418.78
D12	6	9312.57	894.475	741.875	1280.56	115.65
E1	6	4086.09	955.267	593.189	523.229	323.939
E2	6	435888	110723	83504	558816	4178.77
E3	6	316115	83833.1	74112.4	478532	2797.18
E4	6	277576	71377.7	68596	421938	2817.42
E5	6	257439	61955.2	64157.2	391379	3052.29
E6	6	274712	67791.8	68363.7	403788	3262.18
E7	6	327871	81827.9	76605.7	442349	2885.78
E8	6	309592	78788.4	75846.5	449274	3123.26
E9	6	338638	87035.3	80623.9	494177	2948.89
E10	6	444219	111197	92427.2	580302	4176.72
E11	6	18307.6	2895.35	1908.43	2599.5	1476.7
E12	6	5881.8	1305.94	1038.29	2515.93	2537.41
F1	6	45365.9	8031.26	6099.73	7239.26	3800.98
F2	6	462375	115653	88933.9	594729	3919.37
F3	6	311525	81498.3	77148.7	496590	2817.06
F4	6	277147	69705.7	69270.6	431579	2593.12
F5	6	338804	83930.4	77657.4	478711	3012.8
F6	6	306326	77379.2	72010.5	429465	2572.08
F7	6	375879	95170	86018.3	499454	3503.89
F8	6	384981	118188	87719.2	500571	4896.2
F9	6	404483	105605	96588.4	595261	3638.83
F10	6	514919	131593	104269	655462	4443.61
F11	6	17455.8	2798.55	1790.03	2805.83	105.217
F12	6	0	0	0	0	73.0554
G1	6	14586.4	4395.28	5150.04	9981.09	13866.3
G2	6	503747	129593	89498.2	603154	4328.47
G3	6	365885	96351.4	83620.5	563836	2517.88
G4	6	342366	90103.3	78458	499390	2966.3
G5	6	327404	82052.1	71928	447357	2769.97
G6	6	338664	84622.6	76105.6	458118	3269.23
G7	6	402093	102152	86727.9	516637	5490.53
G8	6	387853	100014	85819.9	520008	3252.38
G9	6	431381	115402	96449.2	603706	4137.09
G10	6	488085	126463	98320.6	639310	3510.39
G11	6	11499.8	2991.22	2598.34	4031.58	2984.43
G12	6	82343.1	16291	13083.5	17812	10609.9
H1	6	28271.9	5352.08	3801.87	6245.27	6268.98
H2	6	498093	129361	89799	639990	3534
H3	6	372997	102299	83304.5	582525	3164.04
H4	6	311707	81026.5	68953.5	457999	2994.01
H5	6	349947	91062.6	79633.5	514319	3170.07
H6	6	417269	102851	88949.1	555364	3657.35
H7	6	442050	113460	94678.3	594489	3404.87
H8	6	434986	110535	92776.2	587322	4237.57
H9	6	407065	108077	86731.8	568677	4014.94
H10	6	545847	138581	103001	687291	5010.98
H11	6	10654.5	1681.42	427.524	1934.47	968.666
H12	6	20959.9	3381.44	1803.36	3807.6	4006.95
A1	7	41557.7	4927.12	3020.69	3826.79	1449.76
A2	7	336785	78294.5	55388.7	439562	2965.38
A3	7	216581	52149.8	41961.4	335875	1840.1
A4	7	215386	50363.2	44021.3	331445	1807.92
A5	7	214382	57495.8	43350.6	305951	1887.47
A6	7	191712	46651.5	45152.8	327167	1583.79
A7	7	248517	55878.4	54021.9	380796	2535.34
A8	7	242736	59409.5	50949	365240	2090.53
A9	7	323896	77993.8	66775	485602	2631.59
A10	7	412990	95837.2	74597	544152	4224.03
A11	7	0	0	0	0	0
A12	7	0	109.72	0	578.547	620.451
B1	7	0	0	0	106.539	207.815
B2	7	357697	82782.2	64929.1	491793	2887.68
B3	7	232391	56742.3	51285.4	385622	2061.62
B4	7	203512	49402.5	46694.2	338354	9485.14
B5	7	181446	45215.4	44235.5	305037	2289.4
B6	7	201936	51558.1	50118.3	334880	2044.48
B7	7	247187	56835.6	56258.4	372896	2535.49
B8	7	267673	65441.2	57897.3	385794	2451.01
B9	7	299514	72929.7	63209.5	434516	2224.25
B10	7	425849	100916	79836	548333	3971.59
B11	7	0	104.286	19.4212	344.295	42.0808
B12	7	0	9.43976	0	0	0
C1	7	2313.94	663.649	490.866	941.3	244.623
C2	7	370245	88321.2	69298.6	497827	3912.78
C3	7	238708	59900.6	54672.9	386625	2250.28
C4	7	196807	48923.6	47264.4	323570	2072.67
C5	7	176269	42140.9	46521.8	308267	2489.18
C6	7	232143	61573.4	56525	362702	2473.09
C7	7	255051	58576.1	64236.8	409737	2934.45
C8	7	271909	67184.2	60105.5	382300	2137.72
C9	7	300049	75758.5	65242.5	426190	2183.71
C10	7	429462	104662	82267.7	540392	3839.17
C11	7	1294.23	558.057	340.221	662.809	401.347
C12	7	0	0	0	548.039	74.6905
D1	7	30538.6	6469.6	5223.72	6914.33	4540.24
D2	7	381884	91593.7	74005.1	512861	3092.73
D3	7	274581	71287.9	62549.3	417277	2462.06
D4	7	239017	62587.9	58360.1	377325	1939.42
D5	7	229601	57633.9	60829.1	379493	2553.5
D6	7	231290	57300.1	63830.2	391990	2412.38
D7	7	314133	76524.7	80420.7	477872	3480.61
D8	7	273978	68909.3	64828.2	392789	2143.34
D9	7	295175	75292.1	69754	433820	2819.55
D10	7	447876	109871	91230.7	580039	3818.04
D11	7	15701.1	4966.98	4650.46	7235.65	3408.19
D12	7	9092.95	1248.83	771.266	1240.08	633.603
E1	7	3862.62	735.242	562.598	777.995	0
E2	7	438428	111885	83780.8	559384	3962.43
E3	7	317406	84218.1	74042.9	478903	2869.04
E4	7	278318	71687.6	68522	422023	2711.95
E5	7	257744	61775.1	64110.2	391950	2776.66
E6	7	275502	68166.8	68188.5	403314	3068.79
E7	7	328275	82486.4	76635.2	442151	3159.04
E8	7	310112	79280.9	75606.4	449674	3097.83
E9	7	339252	87622.2	80877.4	494748	3063.65
E10	7	444869	111305	92535.5	581106	3832.1
E11	7	18201.4	2665.11	2004.99	2604.81	1385.19
E12	7	5788.75	1207.04	1017.57	2385.42	2548.78
F1	7	45646.4	8144.31	6107.29	6785.33	3729.8
F2	7	464470	116333	89143.7	594637	3577.64
F3	7	312916	82206.7	77326.4	496226	2909.89
F4	7	277634	70016.2	69345.6	431788	2931.4
F5	7	339000	84529.3	77668.9	478027	2705.2
F6	7	306606	77835.9	72014	429586	2725.96
F7	7	375919	95612.5	86127.7	499422	3562.22
F8	7	385537	118612	87671.2	500921	4812.2
F9	7	405442	106501	96676.2	595954	3547.15
F10	7	516759	132483	104334	656706	4181.41
F11	7	17811.5	2866.31	1818.06	2425.65	45.9684
F12	7	0	0	0	0	330.898
G1	7	15055.4	4428.22	4995.1	10484.9	14068
G2	7	506394	130680	89838.8	603761	4149.34
G3	7	367239	97212	83808.3	563789	2497.68
G4	7	343080	90887.8	78490.5	499842	2935.69
G5	7	328115	82546.5	72001.4	447908	2707.6
G6	7	338986	85034.3	76078.2	458687	3121.09
G7	7	402447	102654	86572.8	516457	5429.82
G8	7	388602	100875	86116.2	520424	3144.51
G9	7	432054	116141	96706.8	604029	3668.4
G10	7	489203	126962	98530.2	639559	3307.43
G11	7	10829.8	2947.87	2699.92	3918.71	2682.24
G12	7	81909.6	16542.7	13177.5	18088	10503.8
H1	7	28525.7	5155.48	4073.31	6024.19	6651.23
H2	7	499216	129575	89737.3	639880	3853.4
H3	7	374327	102762	83454.7	582407	3537.12
H4	7	312392	81613.7	68991	457886	2878.31
H5	7	350429	91279.9	79927.3	513737	3491.99
H6	7	417511	103347	89195.8	555553	3514.35
H7	7	443032	113718	94455.2	593866	3516.98
H8	7	434743	111105	92553.9	586775	4127.18
H9	7	407457	108735	86707.4	568425	3890.74
H10	7	546850	139473	102806	686846	5264.12
H11	7	10941.8	1485.7	410.101	1447.84	1124.13
H12	7	20139.8	3507.89	1799.64	4198.46	3859.92
A1	8	41988.3	5030.52	3020.69	4063.03	1710.58
A2	8	337695	78835.6	55394.2	439424	2541.76
A3	8	216209	52424.5	42025.4	335893	1719.45
A4	8	215209	50311.7	43961.2	331272	1760.23
A5	8	214027	57595.5	43353.8	305768	1932.84
A6	8	192016	46681	45044.5	327405	1316.48
A7	8	249433	56113.4	54018.7	380814	2412.27
A8	8	242470	59755.7	51003.7	364588	2323.82
A9	8	324466	78538.3	66779.8	486134	3009.46
A10	8	413159	96503.1	74719.7	543697	4209.94
A11	8	0	0	0	0	0
A12	8	0	217.894	15.6144	609.591	804.237
B1	8	0	0	0	159.809	0
B2	8	358503	83192.4	65200.8	492028	3435.08
B3	8	233009	56954.1	51162.4	385331	2308.77
B4	8	203788	49833.2	46641.5	337819	9707.63
B5	8	181821	45305.4	44129.9	304850	1964.99
B6	8	202220	51796.8	50125.5	334609	2513.43
B7	8	247644	56940.3	56181.4	373267	2693
B8	8	268511	65946.5	57916.1	385542	2700.81
B9	8	300896	73422.2	63056.6	434649	2138.83
B10	8	426638	101130	79971.8	547756	3838.69
B11	8	0	86.5574	132.882	218.358	0
B12	8	0	165.196	0	0	0
C1	8	2211.75	798.453	771.013	952.476	544.562
C2	8	371071	88856.3	69347.9	498058	4135.51
C3	8	239223	60204	54861.5	386046	2468.48
C4	8	197847	49284.9	47194.4	323689	2091.23
C5	8	176740	42208.4	46529	307993	2208.13
C6	8	231837	61800.8	56575.6	363091	2347.03
C7	8	255306	58792.4	64103.9	409480	3228.23
C8	8	271829	67866.6	60117.7	382385	2507.21
C9	8	300720	76034	65408.6	425927	2172.97
C10	8	430279	105066	82281.5	540252	3796.57
C11	8	1278.81	289.066	309.017	751.995	400.326
C12	8	0	35.885	0	321.34	0
D1	8	30440.4	6451.09	5073.31	6983.05	5203.28
D2	8	382594	91885	73944.1	513357	3309.11
D3	8	274591	72045.2	62617.5	417571	2486.48
D4	8	239570	62733.3	58502.4	377516	2095.36
D5	8	230214	57768.2	60792.8	379673	2690.71
D6	8	231686	57373.7	63760.8	391929	2321.22
D7	8	314699	76926.5	80524.6	477269	3921.7
D8	8	274730	69232.4	64813.2	393063	2424.32
D9	8	295778	75742.8	69563.8	434155	2790.88
D10	8	448837	110118	91372.3	579057	3837.43
D11	8	15841.1	4830.53	4657.23	7135.32	3291.66
D12	8	9345.35	875.147	664.849	1261.8	213.507
E1	8	3958.79	896.503	433.587	728.686	520.762
E2	8	438980	112320	83461.6	559200	4374.62
E3	8	318409	84897.4	74216.2	478768	2710.07
E4	8	278741	72231.4	68740.7	421741	2733.27
E5	8	257200	61701.6	64337.4	391265	2631.21
E6	8	275147	68479.2	68428	403256	3030.7
E7	8	329045	82844.4	76610.6	442358	3002.89
E8	8	310555	79900.8	75748.6	449963	3256.54
E9	8	340035	87701.4	80908.4	494649	2939.71
E10	8	445996	111700	92445	581126	4188.39
E11	8	18396.1	2660.41	2018.65	2500.37	1454.27
E12	8	5744.91	1118.75	953.768	2560.24	2444
F1	8	45660.6	8134.75	6105.78	7382.21	3682.34
F2	8	464901	117341	89118.9	595355	3756.7
F3	8	313618	82653	77174.2	496261	2620.98
F4	8	278192	70393.7	69364.9	431822	3149.38
F5	8	340164	85130.2	77716.2	477817	3036.38
F6	8	307159	78267.2	72160	428910	2568.56
F7	8	376753	96142.7	85991.8	499166	3353.75
F8	8	386127	119015	87801.2	500943	4801.07
F9	8	406698	107131	96888.3	596665	3341.16
F10	8	517649	133212	104475	657109	4451.07
F11	8	17566.9	2793.18	1918.78	2423.63	0
F12	8	0	0	0	0	323.163
G1	8	14542.2	4311.3	5047.78	10760.8	14144.7
G2	8	507291	131881	90128.3	603777	4241.36
G3	8	368385	97807.3	83819.6	564660	2802
G4	8	344042	91511.1	78672.7	499886	2925.82
G5	8	328784	82958.3	72040.4	447353	2771.89
G6	8	339186	85305.5	76089.2	457878	2974.81
G7	8	402678	103016	86781.4	516503	5468.12
G8	8	389572	101358	86096.9	520321	3602.2
G9	8	433619	116501	96713.8	603680	3889.55
G10	8	490724	127763	98372.8	639632	3652.25
G11	8	11174.5	2787.22	2594.67	4237.89	3025.53
G12	8	82304.4	16085	13077	18235.3	10601.2
H1	8	28381.8	4729.83	4080.14	5561.33	6522.12
H2	8	500243	130079	89722.2	640995	3963.3
H3	8	375147	103065	83373	582382	3107.01
H4	8	312550	81642.1	69057.5	457456	3089.01
H5	8	350881	91857.8	79642.5	512648	3293.74
H6	8	417678	103478	89013.9	554305	3500.05
H7	8	443385	114375	94499.5	592417	3436.77
H8	8	435484	111436	92570.5	587007	4218.09
H9	8	407834	109189	86668.1	568613	3899.31
H10	8	546984	139981	102852	686548	5402.43
H11	8	11051.7	1411.42	255.978	1562.81	954.05
H12	8	20930.8	3528.28	1556.09	3965.41	3900.67
A1	9	41375.9	4969.8	2942.89	3716.24	1359.43
A2	9	339102	79040.8	55535.2	440231	2849.66
A3	9	216954	52444.2	42039.6	335397	1846.96
A4	9	216116	50754.1	43816.2	331475	1346.62
A5	9	214764	57629.6	43308.9	305897	1905.3
A6	9	192384	46977.8	45189.5	326853	1459.37
A7	9	250013	56428.3	54087	380943	2466.16
A8	9	242924	59841.4	51010.3	364727	2318.01
A9	9	325097	78878.2	66767.3	485721	2802.21
A10	9	413584	96678.1	74473.4	543234	4267.31
A11	9	0	0	0	0	0
A12	9	0	465.15	0	687.201	458.774
B1	9	0	0	0	90.1487	0
B2	9	359350	83543	65223.8	492395	3269.97
B3	9	234477	57088.3	51391.1	385757	2189.12
B4	9	204395	50101.7	46664.8	337506	9416.15
B5	9	181999	45813	44244.8	304543	2014.7
B6	9	202714	51984.6	50157.5	334392	2429.49
B7	9	248510	57308.9	56224.8	373111	2746.53
B8	9	268488	65850.9	57955.4	385443	2460.56
B9	9	301514	73671.3	63283.5	434549	2343.35
B10	9	426957	101591	79958.4	548124	3874.61
B11	9	0	0	140.037	283.358	0
B12	9	0	0	0	0	0
C1	9	2252.09	755.679	607.797	720.256	511.372
C2	9	372270	89007.8	69561	497723	3937.65
C3	9	239831	60495.3	54745.2	386431	2290.55
C4	9	198252	49344.3	47182.7	323445	2328.58
C5	9	176522	42209.3	46450.3	307819	2188.44
C6	9	231769	61788.4	56514.6	362537	2440.97
C7	9	255848	59253.8	64092	409151	3132.22
C8	9	273265	68199.9	60200.1	382489	2343.08
C9	9	301153	76399.9	65352.4	426092	1952.28
C10	9	430795	105682	82369.2	540174	3919.15
C11	9	1286	404.491	281.84	664.836	599.468
C12	9	0	0	0	545.838	180.136
D1	9	30496	6708.99	5037.5	6895.92	4631.43
D2	9	383378	92137.2	74133	512642	3290.99
D3	9	275908	72201.4	62647.6	417210	2508.86
D4	9	240706	63521	58506.2	378141	1814.07
D5	9	230556	58413.9	60917.6	379941	2693.74
D6	9	232973	58085.4	63792.2	392396	2458.44
D7	9	315571	77382.9	80556.7	477557	3719.33
D8	9	275526	69539.4	64659.7	393059	2536.38
D9	9	296253	76078.2	69671.9	433691	2789.2
D10	9	449835	110751	91346.6	580718	3883.26
D11	9	15742.8	4856.05	4639.84	7137.23	3274.33
D12	9	9196.75	1148.97	770.252	1129.5	341.019
E1	9	4025.27	804.939	432.256	946.47	407.315
E2	9	441754	113073	84245.1	561264	4048.97
E3	9	319272	85106.3	74072.8	478498	2546.75
E4	9	279914	72707.4	68664.5	421906	2680.53
E5	9	257264	61882.8	64261.3	391667	2918.03
E6	9	275570	68730.7	68256.7	403650	3029.73
E7	9	329859	83450	76757.1	442523	2796.98
E8	9	311571	80080.3	75679.1	449474	3361.32
E9	9	340562	88098.1	80781.6	495022	2935.12
E10	9	446283	112077	92579.8	580267	4020.57
E11	9	18074.7	2783.52	2091.53	2726.06	1545.78
E12	9	5934.59	1216.76	1069.78	2464.37	2767.27
F1	9	45770.9	8325.82	6139.04	7282	3864.75
F2	9	465887	117573	88998.7	595314	3785.95
F3	9	314361	83192	77280.7	496289	2700.25
F4	9	278787	71050.2	69432.8	432348	2741.18
F5	9	340908	85344	77532.4	477540	2701.98
F6	9	307698	78522.2	72149.5	428797	2661.77
F7	9	377006	96554	86130.6	498904	3533.54
F8	9	386291	119293	87744.2	500754	4713.02
F9	9	407494	107616	97003.9	596333	3144.88
F10	9	519522	133816	104618	658764	4136.64
F11	9	17726.1	2608.18	1791.07	2399.36	0
F12	9	0	0	0	0	130.64
G1	9	14868.4	4810.27	4809.18	10464.7	13941.6
G2	9	508992	132582	89880	603475	3813.17
G3	9	369110	98124.5	83915.4	564386	2761.59
G4	9	345241	91809.1	78672.7	499800	3025.52
G5	9	329204	83405.8	72116.7	447335	2909.09
G6	9	339833	85876.4	76143.9	457930	2944.25
G7	9	403399	103191	86745.4	516326	5314.93
G8	9	389621	101907	86196.3	520353	3459.36
G9	9	434848	117300	96535.1	604027	3446.22
G10	9	491772	128415	98647.5	640115	3618.42
G11	9	10885.7	2769.37	2768.46	4017.02	2772.9
G12	9	82313.3	16256.7	13202.2	18048	10321.2
H1	9	28525.7	5334.9	3798.45	6158.91	5847.65
H2	9	501995	130747	89972.5	639701	3932.39
H3	9	376156	103495	83238.4	582377	3267.41
H4	9	313747	81926.7	68980.7	457972	3201.88
H5	9	350788	91993	79725.4	512576	3061.13
H6	9	418283	103839	88805.4	554318	3569.76
H7	9	443618	114680	94553.3	592335	3616.53
H8	9	435971	112056	92880.9	586994	4468.56
H9	9	409106	109518	86777.5	568067	3694.81
H10	9	547650	140478	103114	685477	5639.51
H11	9	11196.8	1291.42	463.709	1667.09	1056.36
H12	9	20213.6	3138.74	1872.14	4347.09	3193.87
A1	10	41976.8	5491.72	3242.11	3814.67	1596.93
A2	10	339263	79497.1	55610.6	439482	2687.21
A3	10	217548	52661.9	42023.3	335721	1792.04
A4	10	216341	51105.8	43863	330839	1650.11
A5	10	215028	57490.9	43384.9	305140	2193.68
A6	10	192687	47462.5	45136.9	327005	1338.96
A7	10	250505	56962.3	54169	380780	2200.72
A8	10	243563	59990.6	51021.9	364580	2502.32
A9	10	325227	79048.6	66866.8	485320	3106.82
A10	10	413560	96673	74627.9	542666	4008.65
A11	10	0	0	0	0	0
A12	10	0	259.619	290.995	627.935	236.296
B1	10	0	0	0	0	279.751
B2	10	360022	84458.1	65260.5	492328	3251.14
B3	10	235021	57741	51467.4	385518	2300.93
B4	10	204737	50616.4	46659.7	337457	9524.81
B5	10	182493	45690	44045.5	304548	2318.89
B6	10	202403	52119.7	50217.6	334870	2433.52
B7	10	248371	57450.7	56251.7	373231	2692.24
B8	10	268645	66203	57840	385432	2688.08
B9	10	301394	73925.4	63283.5	434544	2087.09
B10	10	427140	101991	79984.3	548010	3733.63
B11	10	0	0	57.2415	167.577	0
B12	10	0	41.299	0	0	0
C1	10	2338.14	911.222	718.638	622.152	339.276
C2	10	372285	89647.5	69549.5	498163	4003.95
C3	10	240151	60631.2	54813.7	386609	2265.27
C4	10	198358	49829.2	47189.5	323676	1985.74
C5	10	176992	42371	46552.2	307872	2398.78
C6	10	231740	61658.8	56541	362583	2554.19
C7	10	256290	59439.7	64139.7	409330	2924.61
C8	10	273034	68233.8	60227	382260	2291.12
C9	10	301397	76805.5	65396.4	425706	2046.51
C10	10	431224	105791	82543.9	540088	3662.69
C11	10	1306.56	429.584	430.812	735.779	622.956
C12	10	0	0	0	280.622	77.9857
D1	10	30417.1	6578.19	5197.46	7114.37	5259.97
D2	10	383982	92472.8	74156.3	512523	3518.44
D3	10	276804	72706.6	62571.4	417584	2255.53
D4	10	242020	63961.6	58686.2	378479	2049.96
D5	10	231232	58632.8	61017.8	379723	2284.13
D6	10	233408	58498.3	63930.1	392677	2474.75
D7	10	316023	77615.3	80527.5	476965	3818.55
D8	10	275256	69865	64964.2	392664	2309.76
D9	10	296695	76163.1	69645.9	433977	2760.53
D10	10	450987	110878	91356.4	580544	3729.91
D11	10	15758.7	4740.22	4635.97	7093.27	3363.89
D12	10	9368.3	1034.07	681.065	1393.11	21.7461
E1	10	3632.08	1124.73	497.427	820.456	390.913
E2	10	443007	113666	84399.1	561951	4308.58
E3	10	319910	85565.1	74266.5	478565	2751.45
E4	10	280486	72768.8	68652.3	421824	2800.59
E5	10	257036	61760.8	64321.4	391219	2762.42
E6	10	275660	68928.8	68355.9	403311	2958.43
E7	10	329888	83655	76606.7	442554	3188.32
E8	10	311137	80312.8	75896.9	449637	2918.78
E9	10	340900	88482.1	80902	494898	2896.56
E10	10	447317	112230	92640.2	582291	4010.7
E11	10	18344	2630.34	1987.68	2611	1324.18
E12	10	6101.9	1377.46	1025.86	2499.82	2474.05
F1	10	45594.4	8036.04	5878.97	7253.99	3925.55
F2	10	467020	117670	89173.2	595152	4193.22
F3	10	314927	83595.1	77295.6	496305	2579.26
F4	10	280046	71214.8	69282.8	432030	3181.25
F5	10	341407	86043.2	77641.6	477668	3036.38
F6	10	308013	78806.6	72082.2	428443	2300.36
F7	10	377882	96948	86062.6	499385	3523.97
F8	10	387402	119500	87875.2	501168	5111.76
F9	10	408773	108032	96706.2	596448	3450.09
F10	10	520274	134550	104580	657425	4309.31
F11	10	18072.2	2902.88	1782.76	2652.14	0
F12	10	0	0	0	0	345.509
G1	10	15159	4385.4	4891.3	10370.2	13783.5
G2	10	510612	132824	89949.9	603840	4232.77
G3	10	369803	98929.6	83759.1	564105	2646.68
G4	10	345562	92181.3	78678.7	500163	2901.15
G5	10	329660	83463.1	72196.8	447865	2962.82
G6	10	339888	86009.8	75869.2	457637	3127.58
G7	10	403765	103758	86647.6	516591	5104.76
G8	10	390245	102190	86188.6	520467	3371.9
G9	10	434822	117666	96519.9	604336	3918.97
G10	10	492187	128495	98848.5	639620	3389.27
G11	10	11285.1	2657.16	2650.97	4182.07	2667.73
G12	10	82307.3	16236.7	13227	18100.5	10210.1
H1	10	28080	5163.11	3996.49	5858.39	6778.65
H2	10	502525	131111	90087.7	641798	3790.43
H3	10	376292	103918	83647	582256	3086.81
H4	10	313410	82199	69069.7	457420	3240.45
H5	10	351702	92526.9	79675.4	512710	3265.27
H6	10	417756	104134	88778.8	554140	3728.85
H7	10	443980	114947	94386	592926	3821.42
H8	10	436437	112296	92764.2	587238	3983.39
H9	10	409914	110018	86763.7	568310	3929.29
H10	10	548004	140828	102802	685176	5136.93
H11	10	11142.6	1328.56	444.946	1588.21	1231.76
H12	10	20597.9	3344.73	1924.2	4227.82	3347.98
A1	11	41758.6	5529.47	3102.97	3813.16	1299.69
A2	11	339905	79839.9	55548.3	439506	2519.46
A3	11	217655	53031.9	42064.9	335766	1844.02
A4	11	216267	51280.8	43783.5	330842	1576.4
A5	11	215147	57665.3	43258.3	305387	1899.63
A6	11	193123	47645.1	45132.1	327286	1682.53
A7	11	250494	57063.6	54153.7	381149	2253.81
A8	11	243708	60256.9	50956.5	364446	2437.56
A9	11	325886	79501.7	66940.5	485510	2950.66
A10	11	414703	97075.8	74607	542661	4302.53
A11	11	0	0	0	0	0
A12	11	0	387.883	90.8474	553.147	178.259
B1	11	0	0	0	0	102.576
B2	11	361049	84343.5	65365.9	491793	3399.62
B3	11	235094	57941.7	51560.9	385218	2019.44
B4	11	204812	50832.2	46579.4	337610	9498.08
B5	11	182496	45927.8	44202.5	304352	2115.82
B6	11	202876	52308.2	50294.4	334232	2561.86
B7	11	249013	57897	56289.8	373148	2732.76
B8	11	268887	66579.3	58004.8	385358	2617.28
B9	11	302068	74111.8	63156.9	434439	2065.73
B10	11	427447	102089	80114.7	547985	3810.86
B11	11	0	61.5287	107.328	173.671	0
B12	11	0	54.2786	0	0	0
C1	11	2085.37	801.045	667.48	681.759	539.645
C2	11	373217	89481.9	69668.1	497533	3793.65
C3	11	240340	61013.7	54859.6	386733	2458.18
C4	11	199188	50146.2	47260.5	323548	1965.23
C5	11	176958	42526.7	46442.3	307777	2348.66
C6	11	231611	61524.5	56476	362424	2464.26
C7	11	257273	59761.5	64120.6	409013	2946.76
C8	11	273806	68826.4	60143	382057	2408.24
C9	11	302039	76806.3	65330.4	425908	1895.25
C10	11	432013	106209	82457	540671	3777.44
C11	11	1054.71	319.177	204.334	616.19	669.933
C12	11	0	0	0	384.068	0
D1	11	30439.1	6515.26	5146.13	6996.55	4497.1
D2	11	383720	92366.8	74032.5	512517	3408.74
D3	11	276830	72923.1	62746.8	417626	2260.62
D4	11	242442	64332.3	58689.1	378957	2098.32
D5	11	232058	58715.6	61079.7	379335	2677.59
D6	11	234261	58965.8	63971	392400	2253.09
D7	11	316617	78072.6	80634.4	477611	3627.97
D8	11	275659	70189.8	64922.5	392412	2345.71
D9	11	297185	76693	69759.9	433849	2980.6
D10	11	450533	111428	91370.5	580209	3566.86
D11	11	15969.2	4764.76	4675.59	6975.73	3282.99
D12	11	9474.28	965.346	770.252	1116.66	127.511
E1	11	4151.15	1081	500.087	283.53	453.788
E2	11	444730	114293	84278.6	561909	4003.42
E3	11	320905	86210.7	74201.2	478653	2815.69
E4	11	280404	73214.1	68786	421480	2725.41
E5	11	256737	61715.9	64382.5	391830	3044.15
E6	11	275641	68975.8	68226.5	402644	3091.26
E7	11	330573	83902.5	76675.5	442203	3080.97
E8	11	311996	80520.8	75754.7	448920	2958.45
E9	11	341032	88658.6	81005.9	494926	2747.83
E10	11	447454	112816	92668.6	581838	4074.41
E11	11	17953.5	2891.59	1961.26	2625.17	1180.64
E12	11	5766.39	1236.18	1072.26	2549.77	2729.09
F1	11	45729.9	8330.6	5980.28	7115.46	3815.81
F2	11	468047	118379	89174.4	594898	3913.52
F3	11	315541	84000.4	77286	496052	2979.77
F4	11	279642	71766.8	69463.2	431735	3096.94
F5	11	340998	86065.5	77694.1	477084	2692.34
F6	11	308022	79072.6	72013.1	427843	2658.25
F7	11	377903	97450.8	86107	498263	3444.6
F8	11	387647	119959	87954.2	500746	4981.21
F9	11	409731	108406	97071.4	596379	3327.14
F10	11	521765	135217	104709	659659	4299.72
F11	11	17405.6	2867.39	1747.46	2549.01	0
F12	11	0	0	0	0	384.185
G1	11	15140.3	4459.51	4942.43	10044.6	13636
G2	11	511947	133616	90112	603371	4312.52
G3	11	371182	99231.7	83817.1	564173	2895.44
G4	11	346052	92340.6	78689.5	499740	3241.7
G5	11	329776	83983.9	72202.5	446905	2645.24
G6	11	340526	86592.2	75945.9	457258	3244.23
G7	11	404057	104104	86860.7	516095	5558.72
G8	11	390596	102539	86420.2	520630	3426.32
G9	11	435864	118216	96671.4	603817	3707.96
G10	11	493021	129055	98797.4	640238	3594.41
G11	11	10806.4	2708.16	2616.7	4310.71	2571.03
G12	11	82215	16319.6	13240.1	17999.3	10656.8
H1	11	28166	5275.73	3795.04	6155.46	6161.95
H2	11	504271	131767	90182	641609	3776.7
H3	11	378014	104555	83607.3	582858	3123.65
H4	11	313985	82337	69132.4	458047	2849.15
H5	11	351963	92489.8	79626.5	511749	3317.29
H6	11	418347	104440	88743.3	552262	4008.61
H7	11	444307	115358	94356.2	592501	3408.74
H8	11	436921	112862	92678.9	587322	4270.04
H9	11	409947	110317	86860.4	568243	3780.47
H10	11	548932	141029	102752	685194	4913.43
H11	11	10883.2	1717.13	503.915	1451.85	1194.56
H12	11	20110.8	3046.97	1916.76	4011.29	3617.24
A1	12	41647.6	4930.41	3119.43	4158.43	1551.76
A2	12	340815	80234.2	55531.9	439394	2440.89
A3	12	218011	53070.3	42076.1	335560	2015.67
A4	12	216896	51343.9	43879	330871	1631.03
A5	12	215140	57725.3	43332.6	305006	1877.75
A6	12	193502	47833.1	45076.4	326714	1439.3
A7	12	251737	57302.5	54025.9	380400	2421.92
A8	12	244121	60739.9	50830.6	363817	2570.4
A9	12	326343	79798.7	67022.8	484652	2716.42
A10	12	414389	97221.5	74636.9	541880	4017.71
A11	12	0	0	0	0	0
A12	12	0	95.8117	97.9448	309.029	410.409
B1	12	0	0	0	0	402.309
B2	12	361300	84772.4	65289.1	492226	3284.38
B3	12	236316	58198	51593.5	386138	2329.37
B4	12	205658	51083.7	46739.1	337236	9575.69
B5	12	183535	46100.3	44162.9	303899	2351.75
B6	12	202868	52495.9	50217.6	334749	2481.14
B7	12	249370	57954.5	56200.1	372848	2831.4
B8	12	269075	66687	57916.1	385364	2381.8
B9	12	302616	74333.2	63205.4	434238	2237.4
B10	12	428128	102696	80012.9	547910	4133.22
B11	12	0	102.2	167.636	234.608	151.901
B12	12	0	0	0	0	126.51
C1	12	1858.14	662.353	577.346	784.83	499.08
C2	12	374117	90087.8	69596.7	497824	3902.42
C3	12	241091	61295.7	54853.1	386860	2089.22
C4	12	199572	50135.8	47295.5	323295	2103.93
C5	12	177109	42629.7	46564.8	307896	2559
C6	12	231211	61355.2	56578.8	362665	2534.92
C7	12	256902	59546	64133.3	409248	3020.62
C8	12	273974	69091.1	60142.2	382330	2236.69
C9	12	302601	77023	65326.4	425498	2183.71
C10	12	432473	106471	82410.5	540486	3575.75
C11	12	1344.6	495.828	243.59	634.432	555.555
C12	12	0	78.7154	0	288.326	0
D1	12	30648.5	6560.91	5215.36	7050.55	4290.05
D2	12	384738	92646.8	74073.1	512605	3399.69
D3	12	277249	72825.3	62688.7	417354	2521.07
D4	12	243600	64730.2	58750.1	379115	1861.45
D5	12	232496	59035.7	61096.4	379123	2603.95
D6	12	235146	59100.5	63936.8	392633	2302.03
D7	12	317230	78149.5	80522.7	477025	3707.54
D8	12	276564	70224.7	64933.4	392629	2607.46
D9	12	297510	76875.9	69808.5	433777	2985.65
D10	12	451526	111352	91282.9	580252	3924.69
D11	12	15794.5	4997.41	4547.08	6945.16	3431.3
D12	12	9193.47	1139.3	767.212	1242.05	369.684
E1	12	4312.38	1015.4	513.388	653.352	828.299
E2	12	445172	114783	84584.4	562757	4231.15
E3	12	321545	86397.4	74220.5	478381	2636.03
E4	12	281590	73537.8	68571.7	421858	2558.23
E5	12	256707	61406.1	64217.3	391667	3222.14
E6	12	276272	69055	68271.3	402931	3211.39
E7	12	331053	84349.3	76647	442243	3119.03
E8	12	311854	80848.4	76020	448896	3122.25
E9	12	341567	88725.9	81008.6	494554	2928.69
E10	12	448339	112968	92699.6	580680	4324.8
E11	12	18157.6	2578.65	1933.94	2641.1	1518.86
E12	12	5636.65	1153.18	1001	2434.56	2734.78
F1	12	45840.2	8152.27	5892.58	6969.55	3980.43
F2	12	468521	118617	89229.8	595418	3713.39
F3	12	315705	83980.4	77192.3	495621	2646.01
F4	12	280741	71786.5	69404.4	431885	2677.43
F5	12	342187	86460.7	77542.9	476851	2773.79
F6	12	308966	79350.3	72000.9	428061	2899.19
F7	12	378232	97422.5	85739.8	498536	3448.43
F8	12	388210	120298	87785.2	500646	4666.47
F9	12	410783	109052	96914	596293	3289.39
F10	12	522227	135229	104625	658665	4291.19
F11	12	17577.6	2479.12	1905.28	2570.24	0
F12	12	0	0	0	0	556.08
G1	12	14710.4	4148.26	4976.51	10284.9	14016.8
G2	12	513560	133995	90210.6	603100	4056.1
G3	12	371508	99499.6	84076.7	563859	2621.43
G4	12	346565	92550.6	78646.1	500485	3108.44
G5	12	329894	84136.2	72204.4	447811	2524.35
G6	12	340435	86335.2	75893.8	456729	3241.46
G7	12	403584	103802	86572.8	515783	5602.62
G8	12	391158	102928	86427	520356	3471.02
G9	12	436528	118564	96811.8	603945	3734.34
G10	12	493187	129519	98594.3	639273	3633.7
G11	12	11207.1	2789.77	2709.71	4067.99	2746.3
G12	12	82329.7	15982.1	13272.7	17940.6	10101.5
H1	12	28461.8	5264.28	3873.57	5956.84	6150.05
H2	12	504899	132219	90220.5	641683	3742.35
H3	12	378001	104588	83346.5	582731	3120.08
H4	12	313889	82203.7	69154.9	457632	3221.64
H5	12	352239	93068.7	79525.5	511709	3136.7
H6	12	418664	104830	88556.1	552904	3819.13
H7	12	444971	115475	94419.7	591483	3508.29
H8	12	437383	112865	92605.7	586527	4143.88
H9	12	410402	110574	86679.8	568000	3883.25
H10	12	548585	141893	103076	684699	5077.66
H11	12	11218.8	1577.13	336.39	1699.17	1453.66
H12	12	19898.5	3562.95	1794.06	3858.98	3475.53
A1	13	41936.6	5263.58	2886.03	4225.06	1656.67
A2	13	341170	80630.9	55589.9	439866	2588.47
A3	13	218028	53219.6	42063.9	335558	1639.02
A4	13	217343	51520.6	43907.3	330811	1497.5
A5	13	214880	57605.3	43245.2	304795	2294.13
A6	13	193804	47914.7	45155.2	327004	1510.75
A7	13	251673	57510.6	54133.6	380715	2285.18
A8	13	243351	60472.8	50860.4	363892	2259.89
A9	13	326352	79840.6	66910.8	485175	2863.9
A10	13	415192	97449.2	74444.5	542282	4089.17
A11	13	0	0	0	0	0
A12	13	0	384.792	170.339	310.44	424.228
B1	13	0	0	0	204.883	57.2824
B2	13	362338	84999.1	65384.3	492758	3379.67
B3	13	236745	58378.5	51648.4	385808	2136.16
B4	13	205518	51183.1	46580.3	337054	9378.21
B5	13	183174	46163	44173.8	304150	1954.88
B6	13	203348	52798	50212	334467	2307.61
B7	13	249412	58171.9	56146.2	372926	2666.24
B8	13	268628	66461.7	58047.2	385259	2591.82
B9	13	303235	74737	63249.8	434246	2192.22
B10	13	428244	102810	80088.8	547836	4177.22
B11	13	0	0	122.66	171.64	0
B12	13	0	0	0	0	116.434
C1	13	2057.13	496.441	615.105	643.263	532.27
C2	13	374543	90426.7	69637.6	498016	4007.05
C3	13	241454	61501.4	54739.5	386044	2002.13
C4	13	199830	50290.6	47223.6	323100	2166.44
C5	13	177266	42817.3	46348.4	307645	2450.69
C6	13	230747	61596.6	56518.6	362486	2502
C7	13	257620	59926.9	63974.2	409325	2795.77
C8	13	274405	69233.8	60220.4	381724	2326.59
C9	13	302594	77508	65236.8	425531	1984.52
C10	13	432297	106481	82503.5	539936	3700.07
C11	13	1184.23	537.983	171.117	699.294	604.574
C12	13	0	0	0	424.785	244.941
D1	13	30631.7	6658.39	5320.41	7023.55	4668.41
D2	13	385706	92510.9	74184.8	512152	3393.65
D3	13	277463	73170.3	62657.6	416997	2511.91
D4	13	244122	64809.3	58789.8	379953	1906.85
D5	13	232775	59205	60933.3	379568	2703.83
D6	13	235410	59418.2	63889.2	393221	2326.02
D7	13	317623	78165.2	80661.6	477346	3656.46
D8	13	275880	70356.7	64883.3	392727	2316.45
D9	13	297777	76805.9	69856.3	433934	2892.91
D10	13	451991	111622	91284.7	580635	3878.86
D11	13	15870.9	4733.35	4635.01	7161.12	3278.18
D12	13	8870.05	1168.29	668.903	1181.83	212.519
E1	13	4254.4	997.633	661.02	673.897	239.195
E2	13	445569	114854	84327.7	562093	4104.76
E3	13	321888	86598.9	74275.1	478205	2661.08
E4	13	281842	74008.6	68655.6	421625	2403.39
E5	13	255972	61553.9	64198.3	391249	3077.71
E6	13	275944	69088.2	68132.1	402898	3158.65
E7	13	331644	84548.6	76674.5	441796	3061.45
E8	13	312637	81143.7	75819.2	449225	3195.5
E9	13	341425	88670.4	80811.7	494424	3097.62
E10	13	448314	113075	92709.4	580350	4003.52
E11	13	18007.6	2746.87	2047.8	2579.14	1366.35
E12	13	5934.59	1380.99	1053.21	2490.96	2673.86
F1	13	45523.5	8319.45	6126.95	6990.19	3755.01
F2	13	469448	118820	89225	595441	3743.82
F3	13	316450	84030.9	77336	495444	2609.51
F4	13	280548	71853.5	69538.2	431587	2797.73
F5	13	342524	86684.6	77543.9	476691	2606.59
F6	13	308952	79387.4	72042.9	427421	2806.86
F7	13	378286	97641	85996.5	498443	3533.54
F8	13	388499	120270	88036.2	500906	4756.54
F9	13	411244	109187	96957.9	596302	3258.12
F10	13	522676	135933	104856	658112	4670.64
F11	13	17814.7	2634	1731.88	2652.14	0
F12	13	0	0	0	0	397.077
G1	13	14972.1	4377.17	4942.43	10422.9	13821.1
G2	13	514184	134638	90283	603421	4225.41
G3	13	372540	99864.8	83890.2	563672	2392.87
G4	13	347264	92891.6	78792.9	500084	3112.39
G5	13	330267	84213.3	72149.1	447227	2778.6
G6	13	340501	86596.7	75850	456978	3122.95
G7	13	403968	104287	86752.8	516065	5526.96
G8	13	391465	102961	86318.9	520186	3357.32
G9	13	436741	118674	96718.9	604715	4129.99
G10	13	493597	129842	98739.9	640048	3628.24
G11	13	10969	3006.52	2559.17	3934.49	2462.24
G12	13	81973.7	16356.8	13314.4	17933.2	10445.8
H1	13	28449.8	5277.64	3870.15	6611.42	6457.56
H2	13	505513	132354	90383.4	642644	3917.51
H3	13	378068	104927	83626.6	582032	3086.81
H4	13	314232	82472.2	68985.4	457314	3300.65
H5	13	352359	93168.9	79502.5	511428	3234.85
H6	13	418559	104865	88722	552936	3828.06
H7	13	444301	115578	94346.6	591808	3426.14
H8	13	438612	113049	92570.5	586691	4161.51
H9	13	411007	110822	86957.2	567862	3841.49
H10	13	548695	141533	102958	684739	5215.96
H11	13	10848	1647.13	452.988	1561.48	1112.17
H12	13	20016.9	3456.9	1821.95	4615	3723.52
A1	14	41800.7	4851.62	3126.91	3964.59	1628.98
A2	14	341880	80485.3	55480.5	439366	2898.5
A3	14	218398	53380.2	42114.7	335529	1589.98
A4	14	217363	51611.2	43787.9	330022	1722.94
A5	14	215389	57616.6	43314.6	305059	1855.07
A6	14	193939	48140	45152	326185	1656.84
A7	14	252058	57754.2	54243	380301	2553.84
A8	14	244099	60855.3	50826.4	363169	2427.6
A9	14	327273	80247.1	66945.3	484256	2802.21
A10	14	414687	97560.5	74576.1	541602	4435.38
A11	14	0	0	0	0	0
A12	14	0	134.445	227.118	565.847	753.108
B1	14	0	0	0	47.8062	503.553
B2	14	362651	85305.3	65309.8	492777	3531.48
B3	14	236931	58521.8	51584.3	386182	1957.65
B4	14	206274	51129.5	46654.5	337086	9498.08
B5	14	183220	46400.7	44080.9	304197	2130.98
B6	14	203339	53052.1	50307.3	334223	2385.09
B7	14	250071	58312.2	56262.9	372472	2655.54
B8	14	268990	66703.7	57877.7	384858	2735.01
B9	14	303464	74784.2	63398.6	434255	2206.18
B10	14	428600	102891	80104.9	547570	3638.45
B11	14	0	0	29.6429	322.967	34.8962
B12	14	0	0	0	0	0
C1	14	2326.04	776.418	658.954	851.888	476.953
C2	14	375258	90517.2	69462.3	497493	3599.93
C3	14	241966	61723	54731.1	386366	2547.14
C4	14	200360	50475.5	47261.5	323342	2271.93
C5	14	177422	42605.4	46527.2	307713	2379.09
C6	14	230285	61189.1	56565.1	362364	2386.37
C7	14	257281	59877.6	64128.6	409113	3035.39
C8	14	274508	69471.7	60092.5	381755	2329.89
C9	14	303399	77421.5	65372.8	425271	1982.04
C10	14	433481	106826	82530.1	540183	3464.47
C11	14	1038.26	357.317	229.498	815.843	555.555
C12	14	0	0	0	373.063	266.909
D1	14	30751.9	6326.46	5349.06	6929.05	4580.9
D2	14	385922	92772.4	74181.7	512457	3352.39
D3	14	278460	73682.4	62812	417360	2433.57
D4	14	244874	65626.1	59031.7	380373	2192.09
D5	14	233104	59538	60905.8	379371	2960.08
D6	14	236271	59595	64119.3	392735	2320.26
D7	14	318048	78564.2	80637.3	476599	3742.91
D8	14	276250	70462.8	64952.5	392622	2124.11
D9	14	298212	77070.4	69719.7	433994	2714.15
D10	14	452922	112012	91406.8	580592	3857.7
D11	14	15877.9	4753.97	4626.31	7041.67	3256.99
D12	14	9147.58	1270.31	668.903	1037.68	77.0999
E1	14	4241.67	959.367	578.559	769.777	307.537
E2	14	446701	115340	84589.9	562211	4291.5
E3	14	322515	86838.3	74424.9	478218	2848.35
E4	14	282555	73727.2	68619.2	421531	2760.19
E5	14	255636	61524.3	64171.3	391163	3293.34
E6	14	275823	69273.4	68306.3	402152	2862.71
E7	14	331600	84760.2	76593.9	441375	3005.82
E8	14	313042	81128	75817.2	448499	3126.32
E9	14	342251	88642.2	80965.8	494700	2958.99
E10	14	448183	113100	92630.4	580474	3611.33
E11	14	18222.8	2835.2	1914.81	2418.94	1308.03
E12	14	5785.18	1293.58	1086.35	2617.44	2651.93
F1	14	45816.6	8099.72	6031.69	6807.44	3775.77
F2	14	469909	119184	89307.6	595191	4175.67
F3	14	317440	84699.4	77450.9	495378	2626.2
F4	14	281164	72120.6	69623.3	431430	3082.54
F5	14	342674	86926.8	77459.9	476464	2636.6
F6	14	308973	79713.3	71908.2	427397	2618.68
F7	14	378128	97923.4	85758.7	498033	3246.65
F8	14	388771	120519	87973.2	501049	5026.75
F9	14	411666	109396	96878.6	596298	3369.2
F10	14	524002	136280	104808	657705	4640.8
F11	14	17633.1	2720.04	1679.97	2784.6	17.3658
F12	14	0	0	0	0	331.757
G1	14	14914.3	4280.01	5044.68	10742.2	14104.1
G2	14	514818	134760	90284.2	603571	3971.44
G3	14	372870	99752.4	84043.9	564419	2583.55
G4	14	347790	93081.1	78744.7	500008	3099.56
G5	14	330682	84743.5	72143.4	447404	3009.84
G6	14	340136	86755	75961.4	456251	3111.84
G7	14	404089	104620	86752.8	515750	5371.91
G8	14	392087	103289	86178	520545	3303.88
G9	14	437986	118752	96755.2	603226	3638.98
G10	14	494521	129945	98794.2	639587	3748.27
G11	14	10880.5	2738.76	2654.64	3915.07	2537.19
G12	14	82694.6	16446.9	13185.3	17824.5	10506.2
H1	14	28503.7	5144.03	3876.98	5772.04	6255.39
H2	14	507040	133003	90277.5	643953	4183.1
H3	14	379462	105292	83788.8	582782	3117.71
H4	14	314814	82421.2	69033.1	457353	3017.52
H5	14	352269	93472.4	79661.5	511297	3383.05
H6	14	418318	104925	88411.5	552694	3595.68
H7	14	444543	115760	94464.9	591040	3383.61
H8	14	438712	113545	92599.3	586148	4092.86
H9	14	411402	111104	86917.8	567726	3847.92
H10	14	549776	142098	102965	684711	5320.93
H11	14	10957.9	1679.99	385.978	1633.67	1187.91
H12	14	20626.9	3463.02	1784.76	4174.6	3909.52
A1	15	41228.5	4918.92	3194.24	4070.6	1799.46
A2	15	342811	80722.6	55678.4	439597	2859.21
A3	15	218174	53410.3	41992.9	335224	2035.29
A4	15	217872	51938.1	43823.2	330012	1603.28
A5	15	214951	57600.4	43393.8	304320	1765.15
A6	15	194522	48349	45117.8	326830	1352.61
A7	15	251789	57776.4	54323.4	380377	2388.14
A8	15	244491	60788.5	50833	363455	2208.42
A9	15	327584	80484.2	66971.1	484710	2983.43
A10	15	415435	97834.7	74470.4	541992	4330.71
A11	15	0	0	0	0	0
A12	15	0	353.885	224.279	856.532	241.824
B1	15	0	0	0	0	0
B2	15	363372	85446.7	65331.6	493035	3657.81
B3	15	237159	58947.5	51576.2	386454	1926.27
B4	15	206244	51505	46563.9	336354	9514.46
B5	15	183681	46483.3	44257.4	304020	2152.05
B6	15	203634	53167.2	50183.2	334371	2436.75
B7	15	250314	58422.7	56180.6	372703	2430.74
B8	15	268532	66627.1	58091.1	384702	2482.83
B9	15	303514	75186.4	63374.7	434473	2373.74
B10	15	428370	102926	79913.7	547877	3765.96
B11	15	0	195.015	134.926	137.109	0
B12	15	0	0	0	0	0
C1	15	1890.41	828.265	676.007	593.59	314.691
C2	15	375447	90600	69501.2	497321	3563.67
C3	15	242088	61723.9	54834.3	385855	2354.23
C4	15	200341	50805.7	47376.1	323036	2341.28
C5	15	177342	42560.5	46408.3	307375	2415.79
C6	15	229832	61211.6	56539.4	362274	2640.91
C7	15	258217	60050.6	64166	409387	3272.54
C8	15	274985	69732.5	60159.3	381371	2321.64
C9	15	303144	77557.2	65354.9	425466	2237.44
C10	15	433900	107113	82578.3	540545	3624.43
C11	15	1170.87	546.013	258.688	585.786	715.889
C12	15	0	0	0	345.551	0
D1	15	30993.6	6497.98	5090.02	6625.92	4638.83
D2	15	385861	92721.9	74090.3	512045	3232.62
D3	15	278938	73748.7	62792	417195	2508.86
D4	15	245840	65619.7	59154.6	381028	1963.11
D5	15	233259	59862.7	60952.9	379596	2258.9
D6	15	236216	59624.6	64107.9	393449	2288.59
D7	15	318135	78889.1	80447.9	476752	3822.48
D8	15	276203	70705	64898.3	392676	2512.13
D9	15	298620	77343.1	69698.7	433630	2990.71
D10	15	452686	112108	91441.3	580497	3765.16
D11	15	15822.3	4769.67	4637.9	6749.26	3170.32
D12	15	9356.28	1010.45	766.198	1195.65	418.119
E1	15	3776.34	960.734	528.018	635.545	392.28
E2	15	449214	115980	84836.6	565006	3838.32
E3	15	322760	87203.3	74414.2	477982	2619.7
E4	15	282551	74004.4	68636.9	421270	2586.28
E5	15	255612	61428	64302.4	390782	2717.66
E6	15	276245	69696.3	68185.6	402746	3352.04
E7	15	332070	84974.7	76600.8	441907	2962.88
E8	15	313364	81666.5	75685.1	448904	3004.23
E9	15	341981	88956.1	80794.4	494718	2971.84
E10	15	449036	113570	92709.4	580752	4235.95
E11	15	18045.8	2616.24	2076.95	2643.75	1490.15
E12	15	5815.6	1248.55	1095.47	2378.17	2713.66
F1	15	45501.4	8333.78	5859.31	6953.34	4048.64
F2	15	469907	119250	89143.7	594840	3974.37
F3	15	316843	84562.5	77338.1	495571	2851.48
F4	15	282228	72168	69629.4	431156	3071.23
F5	15	342677	86907.5	77575.4	476485	3217.51
F6	15	308553	79802.8	71915.2	426881	2791.03
F7	15	378788	98171.2	85887.1	497998	3535.45
F8	15	388966	120410	87949.2	501093	4865.84
F9	15	412430	109288	97050	596197	3540.68
F10	15	524642	136708	105095	658282	4553.4
F11	15	17588.2	2594.2	1741.23	2790.66	0
F12	15	0	0	0	0	455.522
G1	15	14982.3	4831.68	4837.07	10647.6	14378
G2	15	515866	135091	90198.1	602958	3961.63
G3	15	373702	100092	83916.6	564361	2689.61
G4	15	348635	93062.5	78688.5	500029	3096.6
G5	15	330836	84768	72201.6	447128	2822.74
G6	15	340341	86771.9	75833.6	456308	2972.96
G7	15	404039	104709	86706.6	515833	5311.19
G8	15	392191	103198	86275.5	519982	3425.34
G9	15	438002	119355	96767.4	604039	3595.35
G10	15	494943	130170	98719.2	639246	3752.64
G11	15	10872.7	2975.92	2646.07	4047.36	2850.26
G12	15	81596.9	16123.7	13225.7	17859.5	10339.7
H1	15	29301.2	5319.63	3909.42	5943.02	6311.45
H2	15	507543	133010	90483.6	644180	4038.85
H3	15	380117	105377	83811.6	583000	3033.35
H4	15	314418	82217	69052.8	457450	3172.72
H5	15	353011	93945.1	79662.5	510598	2962.99
H6	15	418592	105162	88576.5	551879	4018.44
H7	15	444406	116061	94162	589852	3552.74
H8	15	438299	113715	92805.9	586766	4265.4
H9	15	411764	111007	86659.6	567866	3755.84
H10	15	549825	141867	102896	684808	5067.78
H11	15	11047.3	1481.42	383.297	1665.75	1245.05
H12	15	19726.4	3238.68	1963.24	4220.48	4455.12
A1	16	42047.6	5321.03	3023.68	3778.33	1193.32
A2	16	343014	81066.5	55371.2	438841	2660.67
A3	16	218976	53200.9	42177.6	335387	1747.9
A4	16	217918	52202.9	43902.8	330644	1584.21
A5	16	214809	57525.8	43088.4	304660	2099.71
A6	16	194746	48470.2	45183.9	326902	1563.73
A7	16	252683	57924.3	54227.7	380932	2376.88
A8	16	244545	60976.4	51010.3	363718	2164.42
A9	16	327832	80698.4	66844.8	485058	2867.76
A10	16	416730	97850.9	74352.8	541016	3954.3
A11	16	0	0	0	0	0
A12	16	0	33.9977	217.182	891.809	458.774
B1	16	0	0	0	165.273	351.688
B2	16	363362	85540.2	65590.7	492483	3425.11
B3	16	237866	59066.5	51778.5	386367	1906.65
B4	16	206339	51595.1	46655.3	336843	9901.66
B5	16	183615	46494.8	44257.4	303889	1918.64
B6	16	203953	53170.3	50147.1	333813	2299.54
B7	16	250452	58464.8	56253.2	373179	2694.53
B8	16	268713	66866.1	57862	385071	2389.76
B9	16	304249	75093.6	63332.8	434243	2372.1
B10	16	428730	102978	80078.1	547222	3591.76
B11	16	0	123.057	117.55	148.281	0
B12	16	0	0	0	0	0
C1	16	2308.56	522.365	570.038	634.57	630.61
C2	16	376362	91000	69554.7	497289	3551.24
C3	16	242690	61894.2	54928.1	386044	2404.8
C4	16	200887	50806.6	47220.6	323460	2178.16
C5	16	177415	42782.8	46498.6	307025	2354.92
C6	16	229955	61111.4	56537	362463	2658.57
C7	16	257918	60333	64243.1	408968	2987.79
C8	16	275355	69645.9	60218	381686	2418.96
C9	16	303916	77784.3	65249.8	424799	2058.9
C10	16	433808	107155	82499.2	540200	3669.64
C11	16	1021.81	590.176	325.122	789.493	538.193
C12	16	0	0	0	215.694	115.331
D1	16	30689.8	6610.27	5174.78	6841.92	4664.71
D2	16	386785	92876.3	73974.6	511803	3253.76
D3	16	279800	73769.4	62686.7	416663	2608.56
D4	16	246567	66128.5	59232	381833	1833.81
D5	16	234199	59901.3	60903.8	379400	2495.99
D6	16	237150	59954	64267.7	393485	2493.94
D7	16	318890	79053.9	80498.4	476976	3723.26
D8	16	276635	71079.2	64891.6	392365	2464.46
D9	16	299341	77404.9	69745.7	434044	2863.4
D10	16	452846	112370	91558.2	580805	3528.96
D11	16	15764.7	4561.57	4680.42	7117.16	3157.8
D12	16	9012.09	1098.5	771.266	1143.32	210.542
E1	16	3916.36	1037.26	593.189	619.109	278.833
E2	16	450758	116011	85149.1	565361	4176.5
E3	16	324050	87248.6	74372.5	477385	2824.4
E4	16	283510	74219.1	68683.3	420662	2774.78
E5	16	254819	61518.6	64242.3	390680	2852.94
E6	16	276203	69489.9	68251.8	402248	3018.98
E7	16	332626	85465	76719.7	441767	3527.94
E8	16	313031	81474.3	75797.1	448628	2952.35
E9	16	342182	88796.9	80974.9	493805	3064.57
E10	16	449147	113340	92626	581269	4157.88
E11	16	18323.5	2879.37	2030.5	2641.98	1213.83
E12	16	5954.28	1284.75	1093.81	2618.24	2636.5
F1	16	45389.5	8335.38	6146.6	6866.39	3898.86
F2	16	471560	119363	89159	594754	4085.55
F3	16	317878	84879.4	77417.9	495320	2873.38
F4	16	282325	72624.3	69472.3	431557	2839.89
F5	16	343180	87149.7	77519.8	476115	2813.45
F6	16	308566	79899	71899.5	426687	2703.98
F7	16	379139	98242.5	86212.7	497997	3175.88
F8	16	389175	120578	87855.2	501130	4887.09
F9	16	412076	109876	97153.9	596190	3533.13
F10	16	524428	136702	105025	657653	4473.46
F11	16	17530.6	2674.87	1782.76	2520.7	82.7431
F12	16	0	0	0	0	392.78
G1	16	15176	4382.11	4971.86	10605.8	14141.7
G2	16	517401	135429	90059.6	603722	3843.85
G3	16	373639	100364	83791.9	563512	2521.67
G4	16	348158	93337.1	78767.3	499959	2944.58
G5	16	330779	85103.6	72061.4	447120	2532.98
G6	16	340383	87175.6	75842.7	456404	2618.35
G7	16	404171	104726	86628.2	515019	5358.83
G8	16	392656	103239	86215.6	520534	3423.4
G9	16	438455	119471	96905.7	604429	3552.74
G10	16	495243	130185	98819.1	639428	3388.18
G11	16	11048.3	2808.89	2703.59	4197.84	2936.08
G12	16	82343.1	16497	13173.5	18161.7	10222.4
H1	16	28763.6	4895.89	4115.99	5987.93	6557.79
H2	16	508489	133256	90643.1	645110	3900.33
H3	16	381128	105560	83588.1	583206	3246.03
H4	16	314793	82357.8	69050.9	457304	3343.92
H5	16	353080	93943.1	79834.4	510860	3193.63
H6	16	418232	105204	88527.7	551357	3588.53
H7	16	445063	116026	94377.4	590847	3696.75
H8	16	439024	113565	92694.7	587263	3950
H9	16	412813	111459	86711.6	568194	3877.89
H10	16	550660	142213	102701	683862	4862.8
H11	16	10673.6	1535.7	502.575	1723.24	895.584
H12	16	20904	3560.91	1855.41	4121.39	3723.52
A1	17	41712.7	5278.36	2989.27	3987.31	1631.9
A2	17	343838	80933.5	55592	439200	2794.45
A3	17	218979	53334.6	41988.8	335196	1862.66
A4	17	218108	52178	43916.1	330068	1598.95
A5	17	214952	57400	43325.3	304678	2303.85
A6	17	194722	48599.1	45185.5	326457	1318.09
A7	17	252687	57939.4	54391.7	380590	2439.62
A8	17	244234	61043.2	50864.5	363494	2331.29
A9	17	327408	80470.9	66973	484312	3106.82
A10	17	416217	98068.4	74408.6	541093	4177.73
A11	17	0	0	0	0	0
A12	17	297.591	270.436	140.53	802.91	103.639
B1	17	0	0	0	95.6123	398.313
B2	17	363735	85464.2	65458.8	492856	3140.33
B3	17	238457	59137.1	51661.6	386203	2202.85
B4	17	206691	51767.5	46515.5	336595	9418.74
B5	17	184104	46546	44115.6	303984	2160.48
B6	17	204041	53426.8	50263.2	333864	2356.84
B7	17	250021	58366.7	56156.7	372668	2827.58
B8	17	268633	66630.1	58020.5	384686	2423.96
B9	17	303848	75095.2	63452	434421	2225.07
B10	17	428953	103336	80000.4	547527	3828.82
B11	17	0	2.08572	17.3769	173.671	157.033
B12	17	0	76.6981	0	62.3683	0
C1	17	2202.34	720.682	406.822	654.439	360.173
C2	17	376489	91065.4	69619.8	497350	3617.54
C3	17	242526	62213.5	54793	386076	2244.67
C4	17	200777	50939.6	47348	323506	2200.62
C5	17	177035	42679	46428	307475	2285.11
C6	17	229018	60743.5	56444.7	362228	2249.87
C7	17	258444	60189.5	64081.6	409174	3028
C8	17	275146	69920.9	60297.1	381369	2477.52
C9	17	304064	78043	65328	424939	2171.31
C10	17	433795	107341	82577.5	540142	3774.83
C11	17	1265.44	388.432	265.734	480.385	552.491
C12	17	0	256.983	0	479.809	0
D1	17	30670.4	6563.38	5382.48	6964.64	4486.01
D2	17	386673	92799.1	74052.8	511369	3521.46
D3	17	279998	73697.3	62716.8	416544	2289.1
D4	17	247324	66685.4	59414.9	382609	2109.18
D5	17	234223	60211.3	61061	379327	2563.59
D6	17	237422	60158.6	64264.8	393617	2242.53
D7	17	318727	79222.4	80658.7	476262	3477.66
D8	17	276635	70704.2	64828.2	391880	2114.07
D9	17	299503	77582.9	69782.5	433710	2817.86
D10	17	453393	112154	91384.7	579775	3742.25
D11	17	15650.5	5065.14	4577.03	6909.8	3271.44
D12	17	9149.77	1135.01	888.831	966.59	259.965
E1	17	4220.45	788.54	601.169	875.245	539.898
E2	17	451602	116860	85054.2	566152	4143.47
E3	17	324248	87385.7	74292.2	477380	2664.34
E4	17	284582	74387.3	68611.5	420482	2753.46
E5	17	254923	61424.2	64106.2	390603	2849.89
E6	17	275910	69369.2	68237.2	402374	3210.42
E7	17	332170	85153.2	76797.4	441702	3164.9
E8	17	313341	81910.8	75829.3	447906	3010.34
E9	17	341679	88748.7	80996.8	494045	3095.78
E10	17	449405	113234	92756.4	580856	4097.75
E11	17	18439	2804.19	1977.66	2747.31	1325.08
E12	17	5443.4	1167.31	1141.87	2379.78	2778.64
F1	17	46019.9	8403.84	6102.75	6937.13	4097.58
F2	17	471750	119420	89300.5	595488	3588.17
F3	17	318761	84925.7	77304.1	494294	2741.97
F4	17	282894	72400.6	69642.6	431339	2813.16
F5	17	343271	87403	77330.7	475893	2725.56
F6	17	308557	80082.2	71951	426622	2718.93
F7	17	378487	98313.8	85921	497973	3003.74
F8	17	389061	120513	87871.2	500761	4807.14
F9	17	413306	109823	97218.1	596051	3669.02
F10	17	525091	136818	104911	658542	4194.2
F11	17	17857.5	2664.11	1972.77	2273.99	53.119
F12	17	0	0	0	0	508.809
G1	17	14798.8	4443.04	4982.71	10542.2	14284.7
G2	17	517471	135384	90274.2	603111	3957.95
G3	17	374096	100430	83861.2	563672	2914.38
G4	17	348676	93245.2	78846.1	499700	3074.88
G5	17	331129	85092.3	72227.3	447243	2781.48
G6	17	340181	87173.8	75861.9	456066	2808.15
G7	17	403904	104663	86581.1	515781	5300.92
G8	17	392636	103678	86103.7	519677	3332.06
G9	17	438320	119284	96723.9	603582	3600.43
G10	17	495498	130442	98921.2	639515	3835.57
G11	17	11542.7	2576.84	2780.7	4061.92	2743.89
G12	17	82587.4	15943.4	13221.8	18211.6	10187.9
H1	17	28695.6	5319.63	4066.48	6129.55	6342.03
H2	17	509046	133546	90749	646408	3996.5
H3	17	381457	105692	83544.8	583923	3344.64
H4	17	314761	82402.3	69035.9	456754	3347.68
H5	17	353153	94037.3	79516.5	511235	3226.02
H6	17	418398	105235	88488.7	551681	3730.64
H7	17	445153	115926	94343.7	589180	3571.11
H8	17	439229	113830	92874.4	586864	4174.49
H9	17	412284	111563	86925.3	567905	3623.08
H10	17	550522	142236	102836	683886	5076.43
H11	17	11281.8	1349.99	331.029	1954.52	1158.68
H12	17	20461.6	2977.63	1788.48	4448.02	3867.01
A1	18	41374	5176.6	2892.02	4000.94	1611.5
A2	18	343873	81446	55499.1	438954	2823.11
A3	18	218820	53341.9	42025.4	335533	1696.89
A4	18	218228	52192.2	43958.5	329978	1522.64
A5	18	214997	57340.8	43169.3	304325	2243.91
A6	18	194946	48607.7	45141.7	326303	1620.72
A7	18	252385	58242.4	54240.6	380529	2260.25
A8	18	244552	61144.6	50980.5	363011	2328.8
A9	18	327857	80747.9	67004.6	484369	2813.78
A10	18	416426	98307.2	74370.7	540282	4069.04
A11	18	0	0	0	0	0
A12	18	0	114.356	80.9109	598.302	764.163
B1	18	0	0	0	0	181.172
B2	18	364195	85929.4	65380.9	493125	3329.81
B3	18	238480	59285.4	51789.7	387040	1937.06
B4	18	207255	51602.7	46664.8	336713	9548.09
B5	18	184369	46406.5	44136.7	303831	1954.88
B6	18	203806	53558.1	50259.2	333647	2490.83
B7	18	251151	58647.3	56133.5	372830	2587.48
B8	18	268680	66795.5	57951.4	384648	2680.12
B9	18	304172	75543.8	63295.8	434308	2128.15
B10	18	429090	103634	79876.2	547428	3631.27
B11	18	0	76.1288	0	376.795	0
B12	18	0	33.0392	0	0	0
C1	18	2045.03	605.321	772.231	935.09	218.808
C2	18	376011	90879	69555.8	497021	3825.76
C3	18	243277	62319.6	54970.4	386416	2313.03
C4	18	201192	51093.4	47281.9	322946	2347.14
C5	18	177152	42618.4	46290.3	307166	2398.78
C6	18	229422	60620.8	56467.2	362314	2633.68
C7	18	258697	60447.5	64146.9	408995	3123.19
C8	18	275600	70113.1	60137.3	381667	2287
C9	18	304067	77925.6	65411.1	425029	2311
C10	18	434423	107326	82524.1	539768	3801.79
C11	18	796.684	380.402	246.61	623.284	714.868
C12	18	0	0	0	607.465	470.111
D1	18	30723.4	6521.43	5044.66	6932.74	4827.39
D2	18	388094	92662.2	74057.9	511582	3563.73
D3	18	280496	73927.6	62791	416905	2493.6
D4	18	248491	66813.5	59467.2	383524	2199.98
D5	18	234538	60177.2	60858.6	379179	2777.47
D6	18	238570	60298.6	64218.2	393484	2668.59
D7	18	319513	79188.2	80435.2	475954	4015.03
D8	18	277036	70918.8	64925	392261	2390.04
D9	18	299642	77585.4	69885.6	433615	2669.47
D10	18	453629	112447	91436	579578	3886.79
D11	18	15976.2	4951.27	4703.61	6941.33	2812.07
D12	18	9210.96	1080.24	683.092	1224.28	244.15
E1	18	4137	891.036	606.489	724.577	337.607
E2	18	452731	116718	85249.5	566252	3964.71
E3	18	325380	87553.5	74169.1	476857	2834.2
E4	18	284900	74767.1	68645.7	420483	2866.79
E5	18	254236	61046.6	63951.1	390516	2958.71
E6	18	275898	69648.4	68160.3	401844	3150.84
E7	18	332454	85593.5	76614.5	441427	3010.7
E8	18	313695	81904.9	75756.7	447902	3113.09
E9	18	342317	88465.7	80905.6	494468	3075.58
E10	18	449004	113429	92731.6	580732	4147.11
E11	18	18284.3	2764.72	1998.61	2711.02	1325.98
E12	18	5767.28	1190.27	1106.24	2588.43	2916.72
F1	18	45936.4	8168.19	6064.95	7119.88	3750.56
F2	18	472198	119552	89312.3	594621	3787.12
F3	18	318818	85152	77350.9	494797	2536.5
F4	18	283248	72928.9	69381.1	431457	3001.32
F5	18	343540	87529.7	77617.4	475554	2636.6
F6	18	308361	80119.3	71772.7	426074	2605.49
F7	18	378291	98503	85896.5	497735	3774.52
F8	18	389173	120477	87766.2	500946	4986.27
F9	18	413388	110123	97330.6	596315	3307.73
F10	18	525657	136845	104926	658438	3923.47
F11	18	17564.7	2899.66	1627.02	2663.26	0
F12	18	0	0	0	0	360.979
G1	18	14829.4	4360.7	4897.5	10788.7	14062
G2	18	518356	135612	90284.2	603264	4010.7
G3	18	375111	100474	83983.4	562877	2448.43
G4	18	349255	93604.8	78715.1	499840	2783.68
G5	18	331300	85362.1	72148.2	447030	2897.58
G6	18	339808	86945.3	75755.1	455989	3166.46
G7	18	403695	104815	86599.6	515450	5429.82
G8	18	392873	103875	86154.8	520428	3509.89
G9	18	438568	119529	96807.8	603784	4048.83
G10	18	496268	130634	98841.9	639559	3559.49
G11	18	11341.1	2528.38	2626.49	3866.53	2823.66
G12	18	82101.8	16384	13275.3	17926.9	10544.5
H1	18	28359.8	5224.19	3938.44	6058.74	6381.11
H2	18	509801	133379	90831.7	646208	3989.63
H3	18	381705	106229	83757.5	583714	3127.21
H4	18	315000	82397.6	68991.9	457438	3228.22
H5	18	353377	94085.4	79739.4	510329	3181.85
H6	18	418806	105216	88544.6	551418	3638.58
H7	18	445016	116214	94258.1	589522	3395.21
H8	18	439069	114082	92805.9	587911	4283.03
H9	18	413205	111360	86864.7	567584	3841.49
H10	18	550374	142022	102867	684418	5071.49
H11	18	11025.3	1839.99	505.255	1589.55	1255.68
H12	18	20483.9	3607.82	1598.85	4170.93	4134.49
A1	19	42260	5124.08	2951.86	3798.01	1221.01
A2	19	344783	81153.7	55667.5	439273	2684.03
A3	19	219101	53657	42013.2	335641	2000.96
A4	19	218603	52492.4	43894	330076	1559.93
A5	19	215000	57284.9	43225.6	304454	1995.21
A6	19	195385	48824.4	45239.7	326051	1492.28
A7	19	252616	58096.8	54252.6	380221	2386.53
A8	19	245044	61432.2	51033.5	362809	2248.27
A9	19	328736	81360	66782.6	484016	2982.47
A10	19	417152	98109.9	74261.1	540421	3679.54
A11	19	0	0	0	0	0
A12	19	0	287.435	0	594.069	467.065
B1	19	0	0	0	21.8542	127.886
B2	19	364791	85791.5	65533.4	492534	3411.81
B3	19	238529	59500.3	51700.2	386728	2179.31
B4	19	207406	51913.6	46676.1	336325	9573.1
B5	19	184422	46397.4	44226.2	303812	2165.53
B6	19	204060	53698.7	50186.4	333452	2142.95
B7	19	250889	58915.6	56162.7	372621	2641.01
B8	19	268618	66843.3	57986.7	384506	2315.77
B9	19	304604	75634.2	63324.6	434231	2356.49
B10	19	429565	103520	79953	547635	3790.2
B11	19	0	22.9429	49.0642	124.921	42.0808
B12	19	0	0	0	0	85.0866
C1	19	1844.7	1056.39	472.596	701.628	331.9
C2	19	376813	91175.4	69586.2	496928	3507.73
C3	19	242760	62383.8	55007	386033	2258.71
C4	19	201718	51111.3	47247.8	322767	1980.86
C5	19	177699	42557	46392.2	306891	2242.14
C6	19	229191	60553.3	56185.5	361908	2432.14
C7	19	259246	60344.3	64122.2	408931	3050.98
C8	19	276024	70255.8	60221.3	381102	2189.68
C9	19	304535	78162.9	65341.8	424539	2025.84
C10	19	434345	107412	82477.7	540047	3645.3
C11	19	1124.61	532.965	315.056	469.237	642.36
C12	19	0	0	0	200.287	199.907
D1	19	30974.2	6590.53	5322.8	6956.05	4630.2
D2	19	388059	92768.2	73974.6	510963	3518.44
D3	19	282020	74443.7	62669.6	416560	2666.55
D4	19	250032	67430.4	59667.5	384376	2101.28
D5	19	234959	60410	61006	378899	2536.35
D6	19	238769	60483.5	64333.3	393492	2263.64
D7	19	320135	79594.6	80616.9	476711	3770.41
D8	19	277252	71136.7	64656.4	391937	2122.43
D9	19	299409	77821.9	69806.9	433261	2734.39
D10	19	453900	112528	91486.5	579933	3606.52
D11	19	15963.2	4784.4	4635.01	7224.18	3339.81
D12	19	8965.11	1179.03	643.566	1299.32	249.092
E1	19	4168.12	841.838	297.924	554.733	158.552
E2	19	455187	117313	85257.4	566266	4053.52
E3	19	327443	88032.3	74287.9	477097	2529.33
E4	19	285973	74995.6	68774.9	420299	2793.85
E5	19	254343	60928.4	64011.1	390789	2980.07
E6	19	275786	69630.9	68081.5	402048	2759.18
E7	19	332766	85497.1	76809.2	441530	2852.6
E8	19	313863	81920.6	75829.3	448138	2997.11
E9	19	341950	88714.1	80907.4	494272	2858
E10	19	449027	113295	92764.4	580593	4143.52
E11	19	18159.5	2786.34	1964	2371.15	1490.15
E12	19	6105.48	1340.38	1156.79	2469.2	2641.37
F1	19	45553.4	8044	6001.45	6943.02	3757.97
F2	19	473198	119586	89243.9	594726	3956.82
F3	19	320010	85362.5	77336	494649	2772.21
F4	19	284018	72859.9	69497.7	431171	2855.31
F5	19	343694	87520.6	77475.7	476298	2837.03
F6	19	308673	80151.4	71802.4	426743	2509.64
F7	19	378685	98469.2	85828.5	497808	3181.62
F8	19	389785	120629	87794.2	501260	4815.24
F9	19	413599	110613	97214.9	596778	3480.29
F10	19	526236	136896	104954	659000	4353.01
F11	19	17775.2	2798.55	1716.31	2648.1	0
F12	19	0	0	0	0	371.293
G1	19	15342.5	4513.85	4959.47	10897.2	13950.6
G2	19	519700	135328	90349.1	603024	4241.36
G3	19	375898	100926	83900.3	563488	2428.23
G4	19	350562	93876.4	78851.1	499862	3169.64
G5	19	331299	85577.4	72048.1	447340	2787.24
G6	19	339679	87100	75815.3	455936	3063.69
G7	19	404052	104767	86547.9	515124	5216.85
G8	19	393078	103962	86210.8	519840	3455.47
G9	19	440004	119594	96881.5	603855	3534.48
G10	19	496477	130799	98752.9	639712	3702.44
G11	19	11345	2477.38	2606.91	4128.67	2926.41
G12	19	82556.1	15994.9	13048.3	17951.9	10203.9
H1	19	28291.9	5212.74	3974.29	6160.64	6610.46
H2	19	510926	133538	91189.1	647418	3751.51
H3	19	382322	105835	83752.7	583419	3225.83
H4	19	315020	82286	69021	457151	3358.97
H5	19	354014	94394.9	79749.4	510612	3161.24
H6	19	418156	105255	88290.9	551055	3651.1
H7	19	445615	116208	94338.9	589189	3399.07
H8	19	439303	114123	92616.9	586463	4143.88
H9	19	413159	111484	86935.9	567606	3990.31
H10	19	550592	142464	102970	683492	4951.71
H11	19	10925.7	1449.99	400.72	1481.26	1255.68
H12	19	19987.9	3520.13	1825.67	4170.93	3532.21
A1	20	41599.8	5022.32	2965.33	4212.95	1754.29
A2	20	344668	81355.4	55526.4	438854	2844.35
A3	20	219379	53803.2	41927.9	335704	1882.28
A4	20	218259	52247.3	43876.3	329836	1712.54
A5	20	214792	57348.1	43189.7	303625	2159.66
A6	20	195439	48977.5	45152	326457	1505.93
A7	20	253023	58283.5	54156.2	380463	2320.57
A8	20	245992	61483.4	51019.4	362765	2264.05
A9	20	329932	80844	66821.9	484249	2973.79
A10	20	418001	98414.5	74140.4	539445	4158.61
A11	20	0	0	0	0	0
A12	20	0	310.615	66.716	289.273	174.113
B1	20	0	0	0	202.152	222.469
B2	20	365030	86226.2	65534.5	492407	3079.38
B3	20	239153	59687.9	51682.9	386721	2082.21
B4	20	207450	52004.5	46464.6	336338	9732.64
B5	20	184644	46756.5	44072.5	303830	2279.28
B6	20	204346	53667.1	50153.5	333569	2345.54
B7	20	251513	58940.3	56284.6	372676	2746.53
B8	20	268558	66860	57770.2	384692	2643.53
B9	20	305134	75787.2	63321.3	434047	2335.14
B10	20	429423	103756	80149.6	547292	3969.79
B11	20	0	214.829	89.951	259.999	281.223
B12	20	0	66.0783	0	0	0
C1	20	1890.41	767.344	640.684	694.177	395.822
C2	20	377179	91286.6	69468.6	496844	3710.77
C3	20	244074	62522.5	54996.6	386012	2284
C4	20	202036	51090.6	47252.7	322758	1988.67
C5	20	178130	42489.5	46600.5	307045	2326.28
C6	20	229565	60257.5	56278.6	362604	2477.91
C7	20	259623	60490	64276.6	409054	3042.77
C8	20	276836	70136.8	60323.2	380856	2225.97
C9	20	304963	78362.2	65297.9	424193	2182.88
C10	20	435405	107311	82617	539792	3578.36
C11	20	1019.76	345.273	276.807	781.385	377.859
C12	20	0	15.0485	0	510.623	74.6905
D1	20	30287.9	6411.6	5300.12	6813.69	4493.4
D2	20	390692	92927.8	73889.3	510871	3177.27
D3	20	283280	74685	62710.8	416169	2626.88
D4	20	252257	67860.1	59532	384895	1918.69
D5	20	235287	60508.4	61045.3	378862	2815.81
D6	20	239028	60698	64146.9	393747	2307.79
D7	20	319855	79672.3	80653.8	476636	3384.33
D8	20	277171	71015.2	64829.1	391900	2611.65
D9	20	299544	77795.5	69863.8	433802	2841.47
D10	20	453409	112421	91430.7	580939	3979.33
D11	20	15791.5	4895.32	4631.14	7153.47	3090.39
D12	20	9225.16	1152.19	730.726	1273.65	514.988
E1	20	4303.9	988.066	555.948	619.109	546.732
E2	20	459231	117687	85386.8	568437	3908.92
E3	20	330757	88444.8	74316.8	476461	2775.4
E4	20	288512	75269.6	68607.1	420290	2735.51
E5	20	253570	60944.6	63966.1	390664	2886.5
E6	20	275525	69305.6	68032.8	402258	3205.53
E7	20	333605	85682.3	76620.4	441277	2942.39
E8	20	314043	82022.6	75580.2	447865	2745.83
E9	20	342430	88671.3	80930.2	494676	3084.77
E10	20	449647	113222	92767	581106	4120.18
E11	20	18232.1	2853.06	2032.32	2734.92	1415.69
E12	20	5819.17	1267.97	1102.1	2456.31	2504.1
F1	20	45882.8	8241.43	6081.59	6988.71	3843.99
F2	20	474745	119784	89175.5	594804	3652.54
F3	20	321166	85499.4	77383.9	493840	2781.6
F4	20	285276	72872.7	69347.7	430902	2943.74
F5	20	343552	87661.4	77422.1	476167	2930.27
F6	20	308731	80377.6	71963.3	425989	2463.92
F7	20	379015	98404.3	85815.3	497117	3650.2
F8	20	389418	120964	87748.2	501577	4812.2
F9	20	413627	110096	97208.5	595889	3178.31
F10	20	526026	137325	104860	659072	4353.01
F11	20	17672.6	2882.45	1776.53	2750.22	0
F12	20	0	0	0	0	511.388
G1	20	14824.3	4461.15	5029.19	10791.8	14195.9
G2	20	521741	136046	90490.1	603266	4025.43
G3	20	377129	100991	84031.3	562914	2319.64
G4	20	351366	93716.1	78707.2	499838	3217.02
G5	20	332062	85485.2	72313.1	446429	2752.7
G6	20	340421	87140	75800.7	455707	3146.09
G7	20	403933	104865	86458.4	515276	5309.32
G8	20	393639	104180	86198.2	520559	3302.91
G9	20	440774	119807	96990.6	603781	3449.27
G10	20	496825	130591	98760.5	639423	3845.39
G11	20	11423	2802.52	2819.87	3916.29	2820.04
G12	20	82095.8	16251	13365.3	18114.2	10318.7
H1	20	28753.6	4920.71	3981.12	5756.49	6462.65
H2	20	511460	133823	91171.6	650089	4019.39
H3	20	383088	106082	83738.3	583716	2850.37
H4	20	315848	82254.8	68843	457465	3143.57
H5	20	354302	94771.4	79590.5	509960	2969.86
H6	20	418753	105162	88325.5	550441	3736
H7	20	445825	116052	94228.3	588913	3487.99
H8	20	439394	114220	92751.2	587208	4283.96
H9	20	413460	111824	86870	567492	4234.42
H10	20	551261	142214	102864	683103	5160.4
H11	20	11277.4	1542.84	415.462	1331.53	1412.47
H12	20	20269.4	3624.14	2009.72	3625.94	3597.75
A1	21	42231.3	5061.71	3113.45	4005.48	1726.6
A2	21	344832	81788.8	55550.5	439060	2755.16
A3	21	220127	53931.7	42084.2	335670	1841.08
A4	21	218568	52378.7	43781.7	329653	1727.28
A5	21	215023	56932.8	43077	303804	2037.34
A6	21	195179	48909.9	45062	326378	1654.43
A7	21	253451	58320.7	54177.1	380070	2372.86
A8	21	246694	61771	50912.6	362535	2374.47
A9	21	331665	81438.1	67025.6	483930	3128.02
A10	21	419666	98655.3	74295	539393	4013.68
A11	21	0	0	0	0	0
A12	21	0	131.355	18.4534	766.222	438.046
B1	21	0	0	0	0	41.2966
B2	21	365507	86265.9	65356.8	493069	3387.43
B3	21	239991	59777.7	51957.4	386662	2191.08
B4	21	208202	52191.4	46698.5	336209	9646.4
B5	21	184655	46683	44055.6	303483	2184.91
B6	21	204500	53612.2	50179.2	333237	2325.36
B7	21	251601	59021	56066.2	372649	2839.05
B8	21	268947	66806.9	57999.3	385009	2493.97
B9	21	305581	75990.8	63420.8	434217	2191.4
B10	21	430284	103952	80097.8	547740	3970.69
B11	21	0	0	60.308	266.092	0
B12	21	0	254.874	0	0	0
C1	21	2215.79	585.878	723.51	854.372	644.132
C2	21	377252	91347.6	69442.4	497303	3844.41
C3	21	244492	62575.5	55098.9	385832	2297.11
C4	21	202049	51539.6	47277	322980	1929.09
C5	21	178856	42617.5	46547.8	307279	2327.17
C6	21	230298	60193.1	56317.1	362123	2287.61
C7	21	261161	60824	64342.6	408376	2868.81
C8	21	276892	70247.1	60144.6	381198	2388.44
C9	21	305781	78407.4	65280.8	424639	2121.72
C10	21	435746	107801	82412.3	540232	3588.79
C11	21	889.203	500.846	298.951	790.507	507.556
C12	21	0	0	0	263.015	48.3292
D1	21	30666.6	6452.32	5011.24	6996.55	4599.39
D2	21	393685	93130.6	73806.1	511196	3284.95
D3	21	286460	74797.7	62784.9	416359	2662.48
D4	21	256570	68355.3	59855.3	385975	1835.79
D5	21	235572	60697	60947	379138	2494.99
D6	21	238994	60787.7	64354.2	394038	2557.28
D7	21	319834	79789.9	80623.7	476331	3828.37
D8	21	276803	70851.6	64782.4	392026	2343.21
D9	21	299900	77711.5	69847.1	433765	2923.26
D10	21	454072	112405	91577.7	580832	3740.48
D11	21	16027.8	4804.03	4619.55	7091.36	3339.81
D12	21	8910.48	1036.22	783.428	1263.77	457.657
E1	21	4149.73	1212.19	506.738	1031.39	466.089
E2	21	465105	118698	85507.4	567882	4257.34
E3	21	336508	89177.9	74068.5	476741	2862.51
E4	21	294225	75542.5	68593.8	419683	2765.8
E5	21	253336	60781.6	64056.2	390927	2840.73
E6	21	275271	69531.4	68008.5	402053	3136.19
E7	21	332776	85774.8	76622.4	441627	2727.69
E8	21	314210	82102.1	75884.8	447763	3163.96
E9	21	342343	88493	80890.1	494306	2948.89
E10	21	449694	113437	92881.5	581086	4171.34
E11	21	18207	2885.01	1982.22	2551.7	1039.79
E12	21	5677.81	1237.95	1062.32	2509.48	2719.35
F1	21	45326.5	7889.55	5945.5	6932.71	4152.46
F2	21	477595	120637	89273.4	595190	3862.02
F3	21	323458	85861.5	77234.9	494220	2770.13
F4	21	287228	73175.3	69619.3	431471	3279.96
F5	21	343522	88007	77494.6	475395	2963.5
F6	21	308411	80180.1	71673.9	425874	2455.12
F7	21	377977	98512.1	85804	497274	3501.02
F8	21	389542	120834	87656.2	500799	4822.32
F9	21	414050	110512	97201	596090	3254.88
F10	21	526843	137197	104999	658097	4428.69
F11	21	17797.6	2669.49	1792.11	2486.32	0
F12	21	0	0	0	0	305.973
G1	21	15337.4	4405.16	4824.68	10119.1	14420.2
[truncated: 10,967 more rows]

## Sheet: Multicomponent Data
Block Type	96alum
Chemistry	SYBR_GREEN
Experiment File Name	D:\HAIFENG\CBF56Untitled.eds
Experiment Run End Time	2013-01-10 07:57:55 AM CST
Instrument Type	sds7500
Passive Reference	ROX
Well	Cycle	SYBR	ROX
A1	1
A2	1	335633	442668
A3	1	218533	339141
A4	1	215774	335557
A5	1	216998	310576
A6	1	191633	331283
A7	1	248681	383590
A8	1	247094	370967
A9	1	329213	492924
A10	1	420823	550065
A11	1
A12	1
B1	1
B2	1	354138	489181
B3	1	230346	383013
B4	1	201952	338770
B5	1	180059	306380
B6	1	202783	337560
B7	1	245298	374108
B8	1	271179	387052
B9	1	304568	437694
B10	1	432174	548282
B11	1
B12	1
C1	1
C2	1	368842	496057
C3	1	236536	385739
C4	1	196184	325111
C5	1	175495	310089
C6	1	233667	363112
C7	1	252417	410042
C8	1	274121	383731
C9	1	302172	426929
C10	1	430649	536840
C11	1
C12	1
D1	1
D2	1	382343	511869
D3	1	272097	416619
D4	1	237187	377467
D5	1	227274	381738
D6	1	231389	395160
D7	1	310441	480911
D8	1	273507	393501
D9	1	293148	432385
D10	1	448319	576887
D11	1
D12	1
E1	1
E2	1	432605	554212
E3	1	315016	477929
E4	1	274904	421697
E5	1	261607	393432
E6	1	277261	406170
E7	1	328207	445324
E8	1	309572	448975
E9	1	338561	491827
E10	1	441752	576776
E11	1
E12	1
F1	1
F2	1	457881	591744
F3	1	312119	498580
F4	1	274087	429978
F5	1	339751	481288
F6	1	310795	434607
F7	1	377579	502642
F8	1	386706	500002
F9	1	402770	595388
F10	1	511205	649132
F11	1
F12	1
G1	1
G2	1	498447	601301
G3	1	364706	563364
G4	1	337923	497191
G5	1	329259	448882
G6	1	340715	460830
G7	1	400782	515547
G8	1	388447	521394
G9	1	433591	605815
G10	1	492065	639200
G11	1
G12	1
H1	1
H2	1	504627	656579
H3	1	374228	587295
H4	1	312144	462103
H5	1	354827	521993
H6	1	421612	563670
H7	1	447039	603854
H8	1	439869	594933
H9	1	412711	576866
H10	1	554841	695668
H11	1
H12	1
A1	2
A2	2	335368	442421
A3	2	218371	338457
A4	2	216252	334565
A5	2	216922	308539
A6	2	191843	329621
A7	2	248710	382911
A8	2	245786	368990
A9	2	326186	487826
A10	2	417499	547906
A11	2
A12	2
B1	2
B2	2	356016	490158
B3	2	231246	383758
B4	2	203190	338922
B5	2	180694	305757
B6	2	202750	335803
B7	2	246464	373310
B8	2	270758	386703
B9	2	302138	436002
B10	2	430635	548443
B11	2
B12	2
C1	2
C2	2	369460	496883
C3	2	237280	386057
C4	2	196284	324414
C5	2	175884	308773
C6	2	233553	362647
C7	2	253567	410316
C8	2	273289	383836
C9	2	301449	427222
C10	2	430268	538337
C11	2
C12	2
D1	2
D2	2	383220	513041
D3	2	272934	417154
D4	2	237293	376052
D5	2	228538	380728
D6	2	230778	393587
D7	2	312356	479681
D8	2	274684	393683
D9	2	294098	433068
D10	2	448219	579095
D11	2
D12	2
E1	2
E2	2	435251	555879
E3	2	316300	478395
E4	2	276358	422333
E5	2	262431	393070
E6	2	277233	405292
E7	2	329326	444574
E8	2	310122	450146
E9	2	339482	493448
E10	2	442882	579574
E11	2
E12	2
F1	2
F2	2	460523	592988
F3	2	312906	498570
F4	2	276271	430997
F5	2	340904	480209
F6	2	309515	432809
F7	2	377778	501395
F8	2	388173	501029
F9	2	404314	595414
F10	2	513962	653462
F11	2
F12	2
G1	2
G2	2	502080	602668
G3	2	366385	564147
G4	2	341082	498257
G5	2	330352	449030
G6	2	341241	460653
G7	2	403618	516494
G8	2	389381	521819
G9	2	434078	607063
G10	2	492041	639710
G11	2
G12	2
H1	2
H2	2	503205	652984
H3	2	376901	587118
H4	2	314191	462174
H5	2	355490	521437
H6	2	422445	563516
H7	2	447998	604291
H8	2	440200	594867
H9	2	412073	575494
H10	2	553439	695326
H11	2
H12	2
A1	3
A2	3	336694	440995
A3	3	217617	336562
A4	3	215933	332799
A5	3	217304	307742
A6	3	191723	328745
A7	3	248430	381746
A8	3	244993	367323
A9	3	325481	486752
A10	3	415672	545601
A11	3
A12	3
B1	3
B2	3	357392	491000
B3	3	232074	383976
B4	3	203912	338797
B5	3	181103	305471
B6	3	202566	335764
B7	3	247136	373005
B8	3	270145	386318
B9	3	301092	434190
B10	3	428514	547182
B11	3
B12	3
C1	3
C2	3	371086	497709
C3	3	238278	386094
C4	3	197202	323820
C5	3	176968	308544
C6	3	234128	362522
C7	3	254858	409680
C8	3	273388	383191
C9	3	301602	427177
C10	3	431006	539221
C11	3
C12	3
D1	3
D2	3	383933	512820
D3	3	273806	416822
D4	3	238490	375810
D5	3	229719	380290
D6	3	231153	392563
D7	3	313389	479473
D8	3	275082	393374
D9	3	295628	433314
D10	3	449603	579289
D11	3
D12	3
E1	3
E2	3	436858	557237
E3	3	317427	478928
E4	3	278007	422422
E5	3	261937	392620
E6	3	276991	405200
E7	3	329433	444206
E8	3	311424	450834
E9	3	341088	494404
E10	3	444451	579928
E11	3
E12	3
F1	3
F2	3	463693	594643
F3	3	313007	497857
F4	3	277723	431001
F5	3	341345	480375
F6	3	309248	431669
F7	3	378705	501328
F8	3	389171	501821
F9	3	405552	595008
F10	3	515740	654592
F11	3
F12	3
G1	3
G2	3	505107	603289
G3	3	367233	563752
G4	3	343286	498923
G5	3	330884	448900
G6	3	342141	459902
G7	3	405069	517656
G8	3	390241	521440
G9	3	434398	604364
G10	3	492110	639316
G11	3
G12	3
H1	3
H2	3	503817	648132
H3	3	376565	585593
H4	3	314711	460681
H5	3	354855	519214
H6	3	423467	562057
H7	3	447997	600753
H8	3	439232	591879
H9	3	412141	572462
H10	3	553387	692035
H11	3
H12	3
A1	4
A2	4	337086	440674
A3	4	218212	336174
A4	4	216214	331916
A5	4	217614	307171
A6	4	192297	327912
A7	4	249425	381562
A8	4	244884	366644
A9	4	326244	486772
A10	4	416178	545412
A11	4
A12	4
B1	4
B2	4	359038	491846
B3	4	233327	384628
B4	4	204516	338722
B5	4	182427	305019
B6	4	203259	335802
B7	4	248230	373609
B8	4	270974	386242
B9	4	301575	434572
B10	4	429405	547677
B11	4
B12	4
C1	4
C2	4	372097	498575
C3	4	239361	386614
C4	4	198040	324096
C5	4	177122	308783
C6	4	234537	362883
C7	4	256140	409943
C8	4	273982	383506
C9	4	302548	426821
C10	4	431874	539976
C11	4
C12	4
D1	4
D2	4	384304	513136
D3	4	275008	417195
D4	4	238902	376409
D5	4	230516	380516
D6	4	232027	392606
D7	4	314209	480119
D8	4	276154	394138
D9	4	296678	433979
D10	4	450553	579769
D11	4
D12	4
E1	4
E2	4	438838	557771
E3	4	319120	479024
E4	4	279191	423239
E5	4	261921	393009
E6	4	278105	405332
E7	4	330404	444647
E8	4	312723	450864
E9	4	342252	495636
E10	4	445472	582251
E11	4
E12	4
F1	4
F2	4	465390	595493
F3	4	314594	497862
F4	4	278918	431875
F5	4	342515	480002
F6	4	310080	431843
F7	4	379474	501464
F8	4	390938	502479
F9	4	406955	596244
F10	4	518735	656038
F11	4
F12	4
G1	4
G2	4	508237	604447
G3	4	369476	564801
G4	4	344832	500261
G5	4	331908	449016
G6	4	342678	460302
G7	4	406210	518426
G8	4	391088	521730
G9	4	435695	605058
G10	4	493142	640082
G11	4
G12	4
H1	4
H2	4	504130	644738
H3	4	377384	584495
H4	4	315351	459767
H5	4	355313	517765
H6	4	422760	560967
H7	4	448805	599384
H8	4	439723	590617
H9	4	412294	571831
H10	4	553332	690952
H11	4
H12	4
A1	5
A2	5	338425	440739
A3	5	218928	336423
A4	5	217541	332000
A5	5	217939	307158
A6	5	192361	327486
A7	5	250273	381034
A8	5	245285	366401
A9	5	327073	486881
A10	5	415825	546002
A11	5
A12	5
B1	5
B2	5	360250	492574
B3	5	234220	384978
B4	5	205142	338355
B5	5	182642	305099
B6	5	203886	335186
B7	5	249399	373247
B8	5	271102	386088
B9	5	302660	435096
B10	5	429209	548413
B11	5
B12	5
C1	5
C2	5	373508	498586
C3	5	240035	386360
C4	5	198721	323901
C5	5	177679	308588
C6	5	235290	363038
C7	5	257108	410163
C8	5	275115	383476
C9	5	303070	427533
C10	5	433272	540740
C11	5
C12	5
D1	5
D2	5	385290	513790
D3	5	276355	418142
D4	5	240209	376581
D5	5	231363	380596
D6	5	233250	393199
D7	5	315479	479566
D8	5	277204	393856
D9	5	297945	434416
D10	5	452303	581350
D11	5
D12	5
E1	5
E2	5	441400	559549
E3	5	320671	479669
E4	5	280082	422666
E5	5	261148	392936
E6	5	278146	405364
E7	5	331621	444485
E8	5	313970	451384
E9	5	342963	495901
E10	5	446611	581592
E11	5
E12	5
F1	5
F2	5	467393	595893
F3	5	315702	497837
F4	5	280304	432962
F5	5	343286	479779
F6	5	310497	431303
F7	5	380199	501418
F8	5	391847	502674
F9	5	408918	596790
F10	5	520652	659157
F11	5
F12	5
G1	5
G2	5	510414	604916
G3	5	371160	565254
G4	5	346487	501342
G5	5	331620	449088
G6	5	343427	459889
G7	5	406581	518274
G8	5	392872	521722
G9	5	437525	606040
G10	5	494593	640771
G11	5
G12	5
H1	5
H2	5	505199	643342
H3	5	379031	584302
H4	5	315932	459388
H5	5	355783	517076
H6	5	423419	559469
H7	5	448957	596685
H8	5	440431	590178
H9	5	412901	571244
H10	5	553961	689825
H11	5
H12	5
A1	6
A2	6	339593	440241
A3	6	218950	336472
A4	6	217746	331666
A5	6	217738	306820
A6	6	193344	327470
A7	6	251275	381665
A8	6	245886	365930
A9	6	327140	486534
A10	6	416990	545697
A11	6
A12	6
B1	6
B2	6	361455	492864
B3	6	234956	385503
B4	6	205789	338178
B5	6	183061	305067
B6	6	204080	335414
B7	6	249693	373858
B8	6	271403	386181
B9	6	303437	435150
B10	6	430642	549655
B11	6
B12	6
C1	6
C2	6	374380	498803
C3	6	241138	386509
C4	6	199510	324030
C5	6	178243	308368
C6	6	235466	362911
C7	6	257385	410121
C8	6	275017	383521
C9	6	303950	427468
C10	6	434625	540604
C11	6
C12	6
D1	6
D2	6	386703	514213
D3	6	277533	418092
D4	6	241422	377730
D5	6	232197	380465
D6	6	234331	393098
D7	6	316831	479465
D8	6	277832	393868
D9	6	298529	434854
D10	6	453796	582012
D11	6
D12	6
E1	6
E2	6	442767	560658
E3	6	321387	480104
E4	6	281462	423457
E5	6	260949	392654
E6	6	278571	405331
E7	6	332407	444362
E8	6	314176	451205
E9	6	343857	496204
E10	6	448430	582560
E11	6
E12	6
F1	6
F2	6	469496	596990
F3	6	316644	498506
F4	6	281320	433105
F5	6	343748	480274
F6	6	310877	431121
F7	6	381442	501704
F8	6	392765	503179
F9	6	410958	597615
F10	6	523054	658239
F11	6
F12	6
G1	6
G2	6	511947	605434
G3	6	372079	565550
G4	6	348053	501184
G5	6	332337	448981
G6	6	343695	459904
G7	6	407838	518788
G8	6	393463	522191
G9	6	438733	606080
G10	6	496096	641648
G11	6
G12	6
H1	6
H2	6	506297	642106
H3	6	379850	584290
H4	6	316851	459443
H5	6	355634	516108
H6	6	423432	557458
H7	6	449094	596661
H8	6	441818	589496
H9	6	414024	570661
H10	6	554509	689933
H11	6
H12	6
A1	7
A2	7	340268	440408
A3	7	219554	336256
A4	7	218213	331890
A5	7	218127	306500
A6	7	194251	327324
A7	7	251542	381314
A8	7	246282	365806
A9	7	328474	486450
A10	7	418246	545420
A11	7
A12	7
B1	7
B2	7	362221	492846
B3	7	235754	386089
B4	7	206430	338742
B5	7	184167	305476
B6	7	205065	335420
B7	7	250354	373528
B8	7	271243	386549
B9	7	303843	435430
B10	7	431687	549701
B11	7
B12	7
C1	7
C2	7	375373	499068
C3	7	241969	387276
C4	7	199706	324065
C5	7	178665	308818
C6	7	235832	363515
C7	7	258057	410588
C8	7	275842	383286
C9	7	304612	427271
C10	7	435680	542110
C11	7
C12	7
D1	7
D2	7	387261	514272
D3	7	278998	418300
D4	7	242820	378145
D5	7	232964	380471
D6	7	234561	393151
D7	7	317239	479696
D8	7	277989	394233
D9	7	299676	435372
D10	7	454399	582229
D11	7
D12	7
E1	7
E2	7	445410	561250
E3	7	322704	480460
E4	7	282227	423531
E5	7	261234	393207
E6	7	279388	404842
E7	7	332867	444173
E8	7	314737	451566
E9	7	344522	496798
E10	7	449081	583364
E11	7
E12	7
F1	7
F2	7	471642	596923
F3	7	318096	498170
F4	7	281834	433321
F5	7	344001	479605
F6	7	311198	431241
F7	7	381524	501688
F8	7	393358	503516
F9	7	411999	598308
F10	7	524968	659472
F11	7
F12	7
G1	7
G2	7	514690	606071
G3	7	373516	565527
G4	7	348845	501633
G5	7	333092	449532
G6	7	344055	460459
G7	7	408239	518590
G8	7	394293	522639
G9	7	439478	606431
G10	7	497257	641918
G11	7
G12	7
H1	7
H2	7	507428	641991
H3	7	381217	584192
H4	7	317596	459337
H5	7	356134	515573
H6	7	423726	557677
H7	7	450092	596020
H8	7	441642	588930
H9	7	414487	570411
H10	7	555606	689472
H11	7
H12	7
A1	8
A2	8	341238	440271
A3	8	219226	336281
A4	8	218032	331712
A5	8	217788	306322
A6	8	194554	327542
A7	8	252473	381331
A8	8	246061	365172
A9	8	329102	486975
A10	8	418498	544986
A11	8
A12	8
B1	8
B2	8	363067	493110
B3	8	236389	385788
B4	8	206752	338210
B5	8	184548	305278
B6	8	205371	335156
B7	8	250817	373881
B8	8	272126	386305
B9	8	305262	435542
B10	8	432491	549149
B11	8
B12	8
C1	8
C2	8	376252	499303
C3	8	242513	386731
C4	8	200773	324173
C5	8	179139	308550
C6	8	235550	363904
C7	8	258331	410318
C8	8	275831	383372
C9	8	305305	427034
C10	8	436532	541974
C11	8
C12	8
D1	8
D2	8	387996	514754
D3	8	279089	418597
D4	8	243381	378353
D5	8	233584	380643
D6	8	234961	393082
D7	8	317838	479120
D8	8	278765	394499
D9	8	300318	435677
D10	8	455376	581281
D11	8
D12	8
E1	8
E2	8	446006	561032
E3	8	323768	480350
E4	8	282701	423284
E5	8	260689	392566
E6	8	279065	404819
E7	8	333663	444373
E8	8	315234	451870
E9	8	345306	496705
E10	8	450236	583373
E11	8
E12	8
F1	8
F2	8	472187	597629
F3	8	318838	498186
F4	8	282425	433357
F5	8	345213	479406
F6	8	311788	430598
F7	8	382401	501419
F8	8	393981	503555
F9	8	413305	599034
F10	8	525927	659886
F11	8
F12	8
G1	8
G2	8	515725	606120
G3	8	374717	566386
G4	8	349863	501700
G5	8	333796	448992
G6	8	344281	459666
G7	8	408504	518664
G8	8	395303	522536
G9	8	441063	606088
G10	8	498850	641972
G11	8
G12	8
H1	8
H2	8	508504	643091
H3	8	382061	584156
H4	8	317754	458921
H5	8	356645	514466
H6	8	423905	556426
H7	8	450514	594602
H8	8	442411	589160
H9	8	414912	570591
H10	8	555801	689183
H11	8
H12	8
A1	9
A2	9	342643	441084
A3	9	219960	335793
A4	9	218980	331894
A5	9	218519	306443
A6	9	194952	327020
A7	9	253082	381468
A8	9	246519	365310
A9	9	329766	486566
A10	9	418939	544501
A11	9
A12	9
B1	9
B2	9	363946	493474
B3	9	237851	386236
B4	9	207382	337905
B5	9	184779	304992
B6	9	205878	334946
B7	9	251712	373734
B8	9	272093	386212
B9	9	305900	435473
B10	9	432860	549511
B11	9
B12	9
C1	9
C2	9	377451	498996
C3	9	243145	387095
C4	9	201179	323932
C5	9	178923	308369
C6	9	235482	363353
C7	9	258912	409994
C8	9	277286	383485
C9	9	305771	427189
C10	9	437111	541909
C11	9
C12	9
D1	9
D2	9	388798	514072
D3	9	280408	418247
D4	9	244585	378966
D5	9	233986	380924
D6	9	236302	393545
D7	9	318744	479407
D8	9	279583	394475
D9	9	300822	435235
D10	9	456430	582912
D11	9
D12	9
E1	9
E2	9	448830	563159
E3	9	324644	480066
E4	9	283909	423436
E5	9	260768	392950
E6	9	279507	405181
E7	9	334525	444555
E8	9	316257	451381
E9	9	345867	497056
E10	9	450565	582545
E11	9
E12	9
F1	9
F2	9	473186	597574
F3	9	319632	498226
F4	9	283082	433884
F5	9	345972	479109
F6	9	312347	430486
F7	9	382691	501181
F8	9	394170	503363
F9	9	414142	598723
F10	9	527845	661533
F11	9
F12	9
G1	9
G2	9	517487	605793
G3	9	375469	566128
G4	9	351080	501616
G5	9	334258	448985
G6	9	344978	459725
G7	9	409236	518485
G8	9	395408	522581
G9	9	442364	606407
G10	9	499959	642481
G11	9
G12	9
H1	9
H2	9	510314	641840
H3	9	383107	584136
H4	9	318968	459420
H5	9	356568	514405
H6	9	424542	556412
H7	9	450779	594528
H8	9	442962	589187
H9	9	416205	570066
H10	9	556519	688156
H11	9
H12	9
A1	10
A2	10	342869	440352
A3	10	220573	336111
A4	10	219247	331274
A5	10	218762	305707
A6	10	195309	327163
A7	10	253631	381318
A8	10	247167	365167
A9	10	329915	486184
A10	10	418915	543959
A11	10
A12	10
B1	10
B2	10	364728	493412
B3	10	238467	386010
B4	10	207777	337857
B5	10	185254	304971
B6	10	205586	335425
B7	10	251589	373856
B8	10	272286	386186
B9	10	305810	435468
B10	10	433088	549402
B11	10
B12	10
C1	10
C2	10	377545	499430
C3	10	243476	387278
C4	10	201334	324160
C5	10	179404	308435
C6	10	235440	363401
C7	10	259368	410176
C8	10	277061	383264
C9	10	306054	426816
C10	10	437548	541845
C11	10
C12	10
D1	10
D2	10	389434	513958
D3	10	281347	418604
D4	10	245930	379323
D5	10	234677	380724
D6	10	236772	393840
D7	10	319215	478823
D8	10	279346	394129
D9	10	301268	435513
D10	10	457582	582742
D11	10
D12	10
E1	10
E2	10	450135	563855
E3	10	325323	480157
E4	10	284481	423355
E5	10	260531	392519
E6	10	279616	404863
E7	10	334572	444566
E8	10	315849	451569
E9	10	346238	496949
E10	10	451594	584544
E11	10
E12	10
F1	10
F2	10	474314	597436
F3	10	320235	498244
F4	10	284345	433551
F5	10	346536	479250
F6	10	312686	430129
F7	10	383596	501643
F8	10	395291	503787
F9	10	415450	598797
F10	10	528668	660211
F11	10
F12	10
G1	10
G2	10	519111	606162
G3	10	376248	565833
G4	10	351437	501973
G5	10	334715	449516
G6	10	345046	459401
G7	10	409655	518733
G8	10	396054	522693
G9	10	442378	606710
G10	10	500378	642017
G11	10
G12	10
H1	10
H2	10	510884	643925
H3	10	383293	584063
H4	10	318667	458888
H5	10	357530	514532
H6	10	424053	556234
H7	10	451166	595088
H8	10	443448	589412
H9	10	417061	570305
H10	10	556910	687823
H11	10
H12	10
A1	11
A2	11	343547	440369
A3	11	220728	336161
A4	11	219196	331268
A5	11	218900	305935
A6	11	195760	327438
A7	11	253632	381679
A8	11	247342	365027
A9	11	330620	486380
A10	11	420090	543952
A11	11
A12	11
B1	11
B2	11	365721	492896
B3	11	238563	385725
B4	11	207876	337997
B5	11	185282	304799
B6	11	206074	334808
B7	11	252271	373780
B8	11	272567	386136
B9	11	306497	435348
B10	11	433402	549393
B11	11
B12	11
C1	11
C2	11	378443	498821
C3	11	243705	387407
C4	11	202189	324044
C5	11	179386	308326
C6	11	235300	363235
C7	11	260373	409863
C8	11	277884	383054
C9	11	306690	427006
C10	11	438373	542409
C11	11
C12	11
D1	11
D2	11	389163	513937
D3	11	281396	418668
D4	11	246385	379793
D5	11	235503	380352
D6	11	237661	393574
D7	11	319843	479472
D8	11	279776	393876
D9	11	301806	435402
D10	11	457192	582414
D11	11
D12	11
E1	11
E2	11	451908	563799
E3	11	326377	480235
E4	11	284445	423035
E5	11	260231	393126
E6	11	279601	404191
E7	11	335274	444231
E8	11	316720	450847
E9	11	346387	496990
E10	11	451795	584102
E11	11
E12	11
F1	11
F2	11	475411	597184
F3	11	320886	497995
F4	11	284002	433286
F5	11	346133	478684
F6	11	312720	429532
F7	11	383665	500549
F8	11	395579	503383
F9	11	416436	598777
F10	11	530213	662426
F11	11
F12	11
G1	11
G2	11	520526	605717
G3	11	377643	565907
G4	11	351939	501559
G5	11	334884	448574
G6	11	345736	459040
G7	11	409979	518275
G8	11	396437	522884
G9	11	443467	606218
G10	11	501266	642620
G11	11
G12	11
H1	11
H2	11	512686	643748
H3	11	385067	584653
H4	11	319251	459512
H5	11	357783	513579
H6	11	424671	554384
H7	11	451534	594666
H8	11	443990	589485
H9	11	417128	570250
H10	11	557848	687835
H11	11
H12	11
A1	12
A2	12	344495	440256
A3	12	221083	335958
A4	12	219823	331307
A5	12	218901	305569
A6	12	196156	326869
A7	12	254886	380927
A8	12	247807	364394
A9	12	331107	485545
A10	12	419802	543184
A11	12
A12	12
B1	12
B2	12	366025	493316
B3	12	239798	386636
B4	12	208740	337650
B5	12	186328	304349
B6	12	206085	335306
B7	12	252631	373473
B8	12	272764	386130
B9	12	307063	435157
B10	12	434146	549308
B11	12
B12	12
C1	12
C2	12	379404	499101
C3	12	244478	387530
C4	12	202568	323800
C5	12	179546	308461
C6	12	234888	363486
C7	12	259984	410095
C8	12	278077	383322
C9	12	307268	426603
C10	12	438856	542221
C11	12
C12	12
D1	12
D2	12	390200	514029
D3	12	281800	418394
D4	12	247570	379957
D5	12	235968	380147
D6	12	238551	393798
D7	12	320460	478882
D8	12	280676	394091
D9	12	302146	435338
D10	12	458165	582446
D11	12
D12	12
E1	12
E2	12	452402	564672
E3	12	327029	479970
E4	12	285651	423377
E5	12	260171	392944
E6	12	280234	404479
E7	12	335790	444267
E8	12	316609	450860
E9	12	346924	496624
E10	12	452691	582968
E11	12
E12	12
F1	12
F2	12	475907	597704
F3	12	321046	497559
F4	12	285091	433424
F5	12	347349	478435
F6	12	313682	429745
F7	12	383987	500767
F8	12	396170	503263
F9	12	417543	598673
F10	12	530671	661437
F11	12
F12	12
G1	12
G2	12	522160	605460
G3	12	377996	565629
G4	12	352468	502286
G5	12	335016	449464
G6	12	345621	458513
G7	12	409481	517930
G8	12	397035	522615
G9	12	444161	606363
G10	12	501484	641645
G11	12
G12	12
H1	12
H2	12	513364	643825
H3	12	385058	584498
H4	12	319140	459107
H5	12	358120	513528
H6	12	425027	554991
H7	12	452202	593674
H8	12	444446	588693
H9	12	417606	569989
H10	12	557614	687384
H11	12
H12	12
A1	13
A2	13	344900	440729
A3	13	221120	335954
A4	13	220285	331252
A5	13	218630	305351
A6	13	196464	327164
A7	13	254848	381251
A8	13	247016	364470
A9	13	331120	486047
A10	13	420620	543559
A11	13
A12	13
B1	13
B2	13	367074	493852
B3	13	240242	386317
B4	13	208612	337450
B5	13	185977	304597
B6	13	206592	335028
B7	13	252695	373543
B8	13	272298	386044
B9	13	307719	435171
B10	13	434273	549244
B11	13
B12	13
C1	13
C2	13	379865	499295
C3	13	244861	386714
C4	13	202838	323600
C5	13	179720	308185
C6	13	234451	363302
C7	13	260732	410148
C8	13	278518	382738
C9	13	307312	426623
C10	13	438684	541691
C11	13
C12	13
D1	13
D2	13	391138	513596
D3	13	282049	418039
D4	13	248095	380784
D5	13	236261	380561
D6	13	238841	394368
D7	13	320850	479216
D8	13	280011	394180
D9	13	302403	435499
D10	13	458654	582823
D11	13
D12	13
E1	13
E2	13	452802	563987
E3	13	327390	479804
E4	13	285948	423159
E5	13	259457	392532
E6	13	279912	404427
E7	13	336394	443832
E8	13	317413	451155
E9	13	346777	496472
E10	13	452679	582644
E11	13
E12	13
F1	13
F2	13	476845	597726
F3	13	321787	497402
F4	13	284908	433150
F5	13	347705	478278
F6	13	313672	429123
F7	13	384062	500712
F8	13	396453	503552
F9	13	418013	598687
F10	13	531193	660922
F11	13
F12	13
G1	13
G2	13	522856	605786
G3	13	379057	565421
G4	13	353196	501910
G5	13	335394	448884
G6	13	345712	458751
G7	13	409910	518232
G8	13	397342	522434
G9	13	444384	607109
G10	13	501926	642427
G11	13
G12	13
H1	13
H2	13	513985	644793
H3	13	385165	583840
H4	13	319511	458773
H5	13	358250	513248
H6	13	424927	555044
H7	13	451553	593984
H8	13	445680	588850
H9	13	418233	569887
H10	13	557678	687411
H11	13
H12	13
A1	14
A2	14	345573	440223
A3	14	221505	335932
A4	14	220316	330460
A5	14	219132	305618
A6	14	196624	326361
A7	14	255257	380858
A8	14	247799	363755
A9	14	332078	485146
A10	14	420139	542904
A11	14
A12	14
B1	14
B2	14	367422	493862
B3	14	240443	386678
B4	14	209353	337491
B5	14	186049	304631
B6	14	206610	334802
B7	14	253362	373114
B8	14	272682	385628
B9	14	307950	435198
B10	14	434634	548983
B11	14
B12	14
C1	14
C2	14	380580	498758
C3	14	245390	387030
C4	14	203382	323842
C5	14	179854	308276
C6	14	233954	363189
C7	14	260392	409962
C8	14	278644	382751
C9	14	308098	426386
C10	14	439892	541938
C11	14
C12	14
D1	14
D2	14	391382	513896
D3	14	283089	418416
D4	14	248921	381230
D5	14	236619	380365
D6	14	239712	393924
D7	14	321309	478481
D8	14	280388	394087
D9	14	302860	435539
D10	14	459616	582796
D11	14
D12	14
E1	14
E2	14	453976	564135
E3	14	328036	479836
E4	14	286625	423063
E5	14	259121	392443
E6	14	279809	403720
E7	14	336370	443408
E8	14	317814	450442
E9	14	347593	496763
E10	14	452552	582755
E11	14
E12	14
F1	14
F2	14	477343	597489
F3	14	322838	497350
F4	14	285544	433007
F5	14	347878	478044
F6	14	313724	429081
F7	14	383932	500277
F8	14	396747	503684
F9	14	418451	598673
F10	14	532541	660516
F11	14
F12	14
G1	14
G2	14	523495	605933
G3	14	379368	566176
G4	14	353737	501829
G5	14	335859	449058
G6	14	345367	458053
G7	14	410064	517923
G8	14	397991	522768
G9	14	445623	605648
G10	14	502849	641979
G11	14
G12	14
H1	14
H2	14	515571	646075
H3	14	386583	584599
H4	14	320078	458817
H5	14	358194	513141
H6	14	424695	554766
H7	14	451812	593244
H8	14	445835	588320
H9	14	418655	569749
H10	14	558812	687384
H11	14
H12	14
A1	15
A2	15	346518	440473
A3	15	221289	335618
A4	15	220858	330455
A5	15	218700	304901
A6	15	197223	326989
A7	15	254994	380943
A8	15	248177	364036
A9	15	332413	485596
A10	15	420909	543277
A11	15
A12	15
B1	15
B2	15	368149	494120
B3	15	240720	386945
B4	15	209366	336760
B5	15	186514	304480
B6	15	206913	334931
B7	15	253613	373329
B8	15	272222	385503
B9	15	308045	435409
B10	15	434411	549263
B11	15
B12	15
C1	15
C2	15	380776	498593
C3	15	245512	386540
C4	15	203398	323557
C5	15	179770	307928
C6	15	233508	363097
C7	15	261336	410236
C8	15	279142	382383
C9	15	307861	426575
C10	15	440338	542301
C11	15
C12	15
D1	15
D2	15	391316	513479
D3	15	283569	418251
D4	15	249876	381889
D5	15	236804	380592
D6	15	239660	394622
D7	15	321425	478605
D8	15	280364	394133
D9	15	303290	435180
D10	15	459393	582707
D11	15
D12	15
E1	15
E2	15	456529	566918
E3	15	328317	479603
E4	15	286649	422809
E5	15	259089	392087
E6	15	280266	404286
E7	15	336855	443931
E8	15	318182	450823
E9	15	347355	496759
E10	15	453444	583040
E11	15
E12	15
F1	15
F2	15	477348	597124
F3	15	322234	497528
F4	15	286602	432739
F5	15	347879	478081
F6	15	313316	428576
F7	15	384609	500260
F8	15	396929	503723
F9	15	419197	598596
F10	15	533219	661119
F11	15
F12	15
G1	15
G2	15	524568	605318
G3	15	380228	566104
G4	15	354570	501843
G5	15	336014	448793
G6	15	345572	458092
G7	15	410023	517998
G8	15	398085	522228
G9	15	445704	606449
G10	15	503291	641634
G11	15
G12	15
H1	15
H2	15	516066	646321
H3	15	387238	584817
H4	15	319664	458915
H5	15	358980	512452
H6	15	424992	553986
H7	15	451710	592037
H8	15	445446	588954
H9	15	419000	569855
H10	15	558832	687471
H11	15
H12	15
A1	16
A2	16	346768	439693
A3	16	222047	335799
A4	16	220937	331087
A5	16	218551	305197
A6	16	197459	327069
A7	16	255893	381476
A8	16	248253	364318
A9	16	332684	485924
A10	16	422184	542300
A11	16
A12	16
B1	16
B2	16	368152	493603
B3	16	241431	386884
B4	16	209470	337253
B5	16	186450	304352
B6	16	207229	334378
B7	16	253754	373806
B8	16	272426	385835
B9	16	308759	435178
B10	16	434773	548637
B11	16
B12	16
C1	16
C2	16	381726	498568
C3	16	246124	386738
C4	16	203938	323952
C5	16	179864	307596
C6	16	233620	363282
C7	16	261066	409836
C8	16	279500	382701
C9	16	308648	425906
C10	16	440251	541951
C11	16
C12	16
D1	16
D2	16	392245	513226
D3	16	284423	417715
D4	16	250647	382690
D5	16	237738	380393
D6	16	240617	394680
D7	16	322188	478831
D8	16	280827	393827
D9	16	304010	435593
D10	16	459579	583024
D11	16
D12	16
E1	16
E2	16	458054	567305
E3	16	329597	479011
E4	16	287621	422218
E5	16	258312	391980
E6	16	280206	403807
E7	16	337451	443812
E8	16	317834	450566
E9	16	347539	495884
E10	16	453527	583538
E11	16
E12	16
F1	16
F2	16	478991	597041
F3	16	323291	497290
F4	16	286745	433112
F5	16	348401	477709
F6	16	313338	428383
F7	16	384964	500303
F8	16	397152	503748
F9	16	418907	598604
F10	16	533008	660491
F11	16
F12	16
G1	16
G2	16	526121	606057
G3	16	380199	565253
G4	16	354128	501784
G5	16	335992	448767
G6	16	345655	458187
G7	16	410156	517189
G8	16	398548	522762
G9	16	446164	606851
G10	16	503589	641824
G11	16
G12	16
H1	16
H2	16	517027	647257
H3	16	388256	584994
H4	16	320050	458771
H5	16	359048	512732
H6	16	424641	553467
H7	16	452355	593044
H8	16	446145	589428
H9	16	420088	570184
H10	16	559696	686515
H11	16
H12	16
A1	17
A2	17	347554	440071
A3	17	222069	335589
A4	17	221121	330521
A5	17	218676	305245
A6	17	197450	326631
A7	17	255898	381161
A8	17	247955	364079
A9	17	332238	485204
A10	17	421708	542382
A11	17
A12	17
B1	17
B2	17	368508	493956
B3	17	242021	386708
B4	17	209837	336992
B5	17	186938	304426
B6	17	207343	334445
B7	17	253318	373291
B8	17	272322	385478
B9	17	308364	435369
B10	17	435035	548929
B11	17
B12	17
C1	17
C2	17	381859	498636
C3	17	245998	386752
C4	17	203843	324015
C5	17	179478	308029
C6	17	232656	363038
C7	17	261573	410016
C8	17	279321	382401
C9	17	308821	426055
C10	17	440260	541904
C11	17
C12	17
D1	17
D2	17	392125	512809
D3	17	284611	417601
D4	17	251452	383476
D5	17	237792	380343
D6	17	240906	394809
D7	17	322043	478154
D8	17	280792	393341
D9	17	304189	435269
D10	17	460097	581990
D11	17
D12	17
E1	17
E2	17	458987	568074
E3	17	329807	478995
E4	17	288699	422032
E5	17	258405	391885
E6	17	279904	403929
E7	17	336970	443758
E8	17	318183	449864
E9	17	347037	496123
E10	17	453772	583147
E11	17
E12	17
F1	17
F2	17	479185	597781
F3	17	324169	496266
F4	17	287285	432921
F5	17	348517	477467
F6	17	313347	428327
F7	17	384325	500240
F8	17	397033	503388
F9	17	420118	598475
F10	17	533675	661352
F11	17
F12	17
G1	17
G2	17	526184	605478
G3	17	380657	565419
G4	17	354631	501540
G5	17	336338	448910
G6	17	345454	457859
G7	17	409885	517930
G8	17	398575	521906
G9	17	446010	605994
G10	17	503871	641924
G11	17
G12	17
H1	17
H2	17	517614	648552
H3	17	388596	585697
H4	17	320024	458228
H5	17	359130	513061
H6	17	424809	553780
H7	17	452433	591400
H8	17	446377	589059
H9	17	419578	569926
H10	17	559563	686555
H11	17
H12	17
A1	18
A2	18	347664	439819
A3	18	221913	335926
A4	18	221241	330438
A5	18	218714	304879
A6	18	197672	326475
A7	18	255637	381081
A8	18	248280	363619
A9	18	332715	485264
A10	18	421945	541578
A11	18
A12	18
B1	18
B2	18	369021	494213
B3	18	242062	387548
B4	18	210375	337126
B5	18	187185	304278
B6	18	207125	334231
B7	18	254465	373447
B8	18	272387	385432
B9	18	308734	435238
B10	18	435205	548816
B11	18
B12	18
C1	18
C2	18	381365	498305
C3	18	246751	387110
C4	18	204269	323457
C5	18	179587	307707
C6	18	233045	363126
C7	18	261850	409850
C8	18	279789	382671
C9	18	308812	426154
C10	18	440878	541529
C11	18
C12	18
D1	18
D2	18	393508	513018
D3	18	285128	417966
D4	18	252620	384381
D5	18	238101	380171
D6	18	242056	394673
D7	18	322820	477820
D8	18	281209	393729
D9	18	304327	435189
D10	18	460362	581802
D11	18
D12	18
E1	18
E2	18	460083	568195
E3	18	330944	478466
E4	18	289052	422038
E5	18	257689	391778
E6	18	279918	403399
E7	18	337292	443463
E8	18	318532	449850
E9	18	347641	496527
E10	18	453397	583022
E11	18
E12	18
F1	18
F2	18	479642	596927
F3	18	324249	496766
F4	18	287689	433003
F5	18	348796	477173
F6	18	313156	427765
F7	18	384149	500005
F8	18	397141	503555
F9	18	420230	598749
F10	18	534238	661251
F11	18
F12	18
G1	18
G2	18	527083	605630
G3	18	381663	564650
G4	18	355242	501660
G5	18	336535	448690
G6	18	345062	457769
G7	18	409694	517608
G8	18	398829	522651
G9	18	446282	606204
G10	18	504652	641956
G11	18
G12	18
H1	18
H2	18	518332	648363
H3	18	388907	585514
H4	18	320259	458896
H5	18	359357	512197
H6	18	425210	553529
H7	18	452330	591725
H8	18	446248	590081
H9	18	420463	569602
H10	18	559391	687082
H11	18
H12	18
A1	19
A2	19	348510	440151
A3	19	222232	336031
A4	19	221648	330527
A5	19	218709	305012
A6	19	198131	326241
A7	19	255847	380781
A8	19	248799	363426
A9	19	333656	484890
A10	19	422632	541701
A11	19
A12	19
B1	19
B2	19	369588	493648
B3	19	242136	387231
B4	19	210560	336747
B5	19	187237	304272
B6	19	207391	334030
B7	19	254235	373247
B8	19	272331	385297
B9	19	309170	435166
B10	19	435660	549029
B11	19
B12	19
C1	19
C2	19	382192	498216
C3	19	246248	386737
C4	19	204791	323275
C5	19	180123	307450
C6	19	232810	362689
C7	19	262383	409783
C8	19	280223	382129
C9	19	309299	425663
C10	19	440810	541798
C11	19
C12	19
D1	19
D2	19	393486	512398
D3	19	286689	417612
D4	19	254207	385245
D5	19	238541	379917
D6	19	242271	394696
D7	19	323472	478588
D8	19	281444	393375
D9	19	304119	434832
D10	19	460638	582158
D11	19
D12	19
E1	19
E2	19	462575	568210
E3	19	333034	478716
E4	19	290137	421875
E5	19	257784	392054
E6	19	279805	403588
E7	19	337592	443591
E8	19	318701	450090
E9	19	347301	496334
E10	19	453406	582890
E11	19
E12	19
F1	19
F2	19	480632	597023
F3	19	325450	496619
F4	19	288444	432736
F5	19	348948	477884
F6	19	313469	428425
F7	19	384536	500066
F8	19	397761	503867
F9	19	420489	599189
F10	19	534815	661809
F11	19
F12	19
G1	19
G2	19	528369	605402
G3	19	382493	565242
G4	19	356562	501699
G5	19	336556	448982
G6	19	344950	457725
G7	19	410042	517281
G8	19	399041	522081
G9	19	447708	606282
G10	19	504877	642097
G11	19
G12	19
H1	19
H2	19	519456	649596
H3	19	389466	585223
H4	19	320266	458617
H5	19	360020	512477
H6	19	424572	553139
H7	19	452921	591408
H8	19	446483	588632
H9	19	420432	569633
H10	19	559661	686181
H11	19
H12	19
A1	20
A2	20	348428	439723
A3	20	222525	336084
A4	20	221278	330288
A5	20	218513	304192
A6	20	198202	326628
A7	20	256271	381006
A8	20	249740	363382
A9	20	334769	485124
A10	20	423507	540725
A11	20
A12	20
B1	20
B2	20	369881	493522
B3	20	242774	387222
B4	20	210613	336732
B5	20	187495	304269
B6	20	207670	334141
B7	20	254854	373317
B8	20	272273	385451
B9	20	309711	434985
B10	20	435548	548716
B11	20
B12	20
C1	20
C2	20	382566	498119
C3	20	247562	386715
C4	20	205104	323267
C5	20	180543	307630
C6	20	233152	363383
C7	20	262771	409926
C8	20	281014	381901
C9	20	309744	425318
C10	20	441846	541564
C11	20
C12	20
D1	20
D2	20	396100	512297
D3	20	287962	417232
D4	20	256452	385736
D5	20	238875	379887
D6	20	242548	394920
D7	20	323201	478519
D8	20	281353	393362
D9	20	304250	435370
D10	20	460141	583141
D11	20
D12	20
E1	20
E2	20	466604	570364
E3	20	336353	478094
E4	20	292677	421843
E5	20	257019	391925
E6	20	279517	403786
E7	20	338442	443317
E8	20	318888	449789
E9	20	347772	496735
E10	20	454009	583394
E11	20
E12	20
F1	20
F2	20	482180	597092
F3	20	326607	495828
F4	20	289690	432452
F5	20	348821	477748
F6	20	313548	427707
F7	20	384856	499387
F8	20	397430	504172
F9	20	420463	598314
F10	20	534654	661868
F11	20
F12	20
G1	20
G2	20	530468	605656
G3	20	383714	564692
G4	20	357339	501658
G5	20	337301	448121
G6	20	345689	457498
G7	20	409934	517418
G8	20	399618	522785
G9	20	448492	606224
G10	20	505196	641813
G11	20
G12	20
H1	20
H2	20	520019	652234
H3	20	390250	585514
H4	20	321078	458904
H5	20	360346	511816
H6	20	425151	552540
H7	20	453111	591122
H8	20	446583	589382
H9	20	420768	569513
H10	20	560288	685785
H11	20
H12	20
A1	21
A2	21	348652	439929
A3	21	223276	336068
A4	21	221599	330097
A5	21	218690	304353
A6	21	197938	326538
A7	21	256696	380623
A8	21	250466	363142
A9	21	336549	484835
A10	21	425175	540692
A11	21
A12	21
B1	21
B2	21	370354	494156
B3	21	243611	387196
B4	21	211377	336635
B5	21	187498	303926
B6	21	207817	333818
B7	21	254949	373261
B8	21	272651	385793
B9	21	310175	435164
B10	21	436420	549151
B11	21
B12	21
C1	21
C2	21	382646	498569
C3	21	247980	386552
C4	21	205164	323489
C5	21	181274	307852
C6	21	233872	362917
C7	21	264327	409269
C8	21	281081	382212
C9	21	310557	425753
C10	21	442237	541971
C11	21
C12	21
D1	21
D2	21	399073	512607
D3	21	291116	417428
D4	21	260772	386839
D5	21	239176	380142
D6	21	242522	395235
D7	21	323192	478217
D8	21	280972	393479
D9	21	304594	435332
D10	21	460795	583053
D11	21
D12	21
E1	21
E2	21	472514	569832
E3	21	342116	478339
E4	21	298361	421245
E5	21	256772	392195
E6	21	279286	403583
E7	21	337627	443661
E8	21	319062	449730
E9	21	347669	496366
E10	21	454079	583390
E11	21
E12	21
F1	21
F2	21	485091	597483
F3	21	328910	496184
F4	21	291652	433048
F5	21	348826	477000
F6	21	313212	427555
F7	21	383838	499540
F8	21	397541	503396
F9	21	420925	598511
F10	21	535448	660926
F11	21
F12	21
G1	21
[truncated: 10,967 more rows]

## Sheet: Amplification Data
Block Type	96alum
Chemistry	SYBR_GREEN
Experiment File Name	D:\HAIFENG\CBF56Untitled.eds
Experiment Run End Time	2013-01-10 07:57:55 AM CST
Instrument Type	sds7500
Passive Reference	ROX
Well	Cycle	Target Name	Rn	ΔRn
A1	1
A1	2
A1	3
A1	4
A1	5
A1	6
A1	7
A1	8
A1	9
A1	10
A1	11
A1	12
A1	13
A1	14
A1	15
A1	16
A1	17
A1	18
A1	19
A1	20
A1	21
A1	22
A1	23
A1	24
A1	25
A1	26
A1	27
A1	28
A1	29
A1	30
A1	31
A1	32
A1	33
A1	34
A1	35
A1	36
A1	37
A1	38
A1	39
A1	40
A2	1	CBF5	0.758203	-0.00785001
A2	2	CBF5	0.75803	-0.00930546
A2	3	CBF5	0.763486	-0.00513077
A2	4	CBF5	0.764934	-0.00496467
A2	5	CBF5	0.767859	-0.00332127
A2	6	CBF5	0.771379	-0.00108272
A2	7	CBF5	0.77262	-0.00112304
A2	8	CBF5	0.775063	3.79226e-05
A2	9	CBF5	0.77682	0.000513487
A2	10	CBF5	0.778625	0.00103656
A2	11	CBF5	0.780135	0.00126488
A2	12	CBF5	0.782487	0.0023359
A2	13	CBF5	0.782567	0.00113341
A2	14	CBF5	0.784995	0.00228042
A2	15	CBF5	0.786694	0.00269751
A2	16	CBF5	0.78866	0.00338217
A2	17	CBF5	0.789769	0.00320966
A2	18	CBF5	0.79047	0.00262903
A2	19	CBF5	0.791797	0.00267365
A2	20	CBF5	0.79238	0.00197566
A2	21	CBF5	0.792518	0.000832182
A2	22	CBF5	0.794964	0.00199654
A2	23	CBF5	0.795439	0.00118995
A2	24	CBF5	0.796307	0.000776091
A2	25	CBF5	0.796865	5.25891e-05
A2	26	CBF5	0.796781	-0.00131387
A2	27	CBF5	0.799218	-0.000157738
A2	28	CBF5	0.798302	-0.00235544
A2	29	CBF5	0.800199	-0.00174058
A2	30	CBF5	0.801645	-0.00157568
A2	31	CBF5	0.802636	-0.00186633
A2	32	CBF5	0.803053	-0.00273086
A2	33	CBF5	0.804565	-0.0025014
A2	34	CBF5	0.806241	-0.00210618
A2	35	CBF5	0.811582	0.00195293
A2	36	CBF5	0.815065	0.00415453
A2	37	CBF5	0.830034	0.0178418
A2	38	CBF5	0.852634	0.0391598
A2	39	CBF5	0.895796	0.0810405
A2	40	CBF5	0.977619	0.161581
A3	1	CBF5	0.644372	-0.00648437
A3	2	CBF5	0.645197	-0.00617184
A3	3	CBF5	0.646587	-0.00529372
A3	4	CBF5	0.649105	-0.00328829
A3	5	CBF5	0.650753	-0.00215221
A3	6	CBF5	0.650722	-0.00269446
A3	7	CBF5	0.652939	-0.000989984
A3	8	CBF5	0.651914	-0.00252686
A3	9	CBF5	0.655046	9.27846e-05
A3	10	CBF5	0.656251	0.000785773
A3	11	CBF5	0.656613	0.000636191
A3	12	CBF5	0.658065	0.00157636
A3	13	CBF5	0.658184	0.00118305
A3	14	CBF5	0.659374	0.00186108
A3	15	CBF5	0.659348	0.0013224
A3	16	CBF5	0.661249	0.00271205
A3	17	CBF5	0.661728	0.00267846
A3	18	CBF5	0.6606	0.00103888
A3	19	CBF5	0.661341	0.00126802
A3	20	CBF5	0.662111	0.00152596
A3	21	CBF5	0.664376	0.00327818
A3	22	CBF5	0.663781	0.00217182
A3	23	CBF5	0.663798	0.00167683
A3	24	CBF5	0.664662	0.00202793
A3	25	CBF5	0.663584	0.000438415
A3	26	CBF5	0.664726	0.00106834
A3	27	CBF5	0.664603	0.000433518
A3	28	CBF5	0.664552	-0.00012996
A3	29	CBF5	0.66695	0.00175584
A3	30	CBF5	0.665844	0.000138371
A3	31	CBF5	0.669241	0.00302302
A3	32	CBF5	0.666331	-0.000398617
A3	33	CBF5	0.666075	-0.00116654
A3	34	CBF5	0.666268	-0.00148576
A3	35	CBF5	0.66796	-0.000305797
A3	36	CBF5	0.666901	-0.00187689
A3	37	CBF5	0.665537	-0.00375262
A3	38	CBF5	0.666742	-0.00306011
A3	39	CBF5	0.666743	-0.00357144
A3	40	CBF5	0.667858	-0.00296791
A4	1	CBF5	0.64303	-0.00978767
A4	2	CBF5	0.646368	-0.00730307
A4	3	CBF5	0.648838	-0.00568603
A4	4	CBF5	0.651411	-0.0039658
A4	5	CBF5	0.655245	-0.000985359
A4	6	CBF5	0.65652	-0.00056249
A4	7	CBF5	0.657486	-0.000450281
A4	8	CBF5	0.657293	-0.00149541
A4	9	CBF5	0.659789	0.000147561
A4	10	CBF5	0.66183	0.0013348
A4	11	CBF5	0.661688	0.000340329
A4	12	CBF5	0.6635	0.00129952
A4	13	CBF5	0.665006	0.00195246
A4	14	CBF5	0.666693	0.00278684
A4	15	CBF5	0.668347	0.00358725
A4	16	CBF5	0.667307	0.00169453
A4	17	CBF5	0.669008	0.00254256
A4	18	CBF5	0.669539	0.00222091
A4	19	CBF5	0.670589	0.0024177
A4	20	CBF5	0.669955	0.000930477
A4	21	CBF5	0.671315	0.00143775
A4	22	CBF5	0.672012	0.00128209
A4	23	CBF5	0.671608	2.49436e-05
A4	24	CBF5	0.673834	0.00139755
A4	25	CBF5	0.673075	-0.000213885
A4	26	CBF5	0.673411	-0.000730803
A4	27	CBF5	0.674153	-0.000841813
A4	28	CBF5	0.674796	-0.00105236
A4	29	CBF5	0.674847	-0.00185401
A4	30	CBF5	0.674733	-0.00282106
A4	31	CBF5	0.675641	-0.00276608
A4	32	CBF5	0.677301	-0.00195876
A4	33	CBF5	0.679551	-0.000562366
A4	34	CBF5	0.681515	0.000549235
A4	35	CBF5	0.687031	0.00521214
A4	36	CBF5	0.698081	0.015409
A4	37	CBF5	0.717702	0.0341767
A4	38	CBF5	0.754157	0.0697789
A4	39	CBF5	0.826349	0.141118
A4	40	CBF5	0.948407	0.262323
A5	1	CBF5	0.698696	-0.0100581
A5	2	CBF5	0.703061	-0.0061635
A5	3	CBF5	0.706122	-0.00357138
A5	4	CBF5	0.708446	-0.00171704
A5	5	CBF5	0.709533	-0.00109985
A5	6	CBF5	0.709658	-0.00144414
A5	7	CBF5	0.711668	9.62593e-05
A5	8	CBF5	0.71098	-0.00106164
A5	9	CBF5	0.713081	0.000570138
A5	10	CBF5	0.715592	0.00261152
A5	11	CBF5	0.715514	0.00206397
A5	12	CBF5	0.716371	0.00245198
A5	13	CBF5	0.715996	0.00160724
A5	14	CBF5	0.717014	0.00215547
A5	15	CBF5	0.717281	0.00195351
A5	16	CBF5	0.716097	0.000299282
A5	17	CBF5	0.716395	0.000128436
A5	18	CBF5	0.71738	0.000643103
A5	19	CBF5	0.717052	-0.000154366
A5	20	CBF5	0.718339	0.00066345
A5	21	CBF5	0.718539	0.000393839
A5	22	CBF5	0.718477	-0.000137376
A5	23	CBF5	0.717982	-0.00110222
A5	24	CBF5	0.717467	-0.00208702
A5	25	CBF5	0.718775	-0.00124834
A5	26	CBF5	0.719256	-0.00123662
A5	27	CBF5	0.718686	-0.00227626
A5	28	CBF5	0.72293	0.00149806
A5	29	CBF5	0.727088	0.00518703
A5	30	CBF5	0.738699	0.0163285
A5	31	CBF5	0.757187	0.0343465
A5	32	CBF5	0.793823	0.0705131
A5	33	CBF5	0.864585	0.140806
A5	34	CBF5	0.987448	0.263199
A5	35	CBF5	1.18263	0.457908
A5	36	CBF5	1.45018	0.724988
A5	37	CBF5	1.76124	1.03558
A5	38	CBF5	2.04575	1.31963
A5	39	CBF5	2.27622	1.54962
A5	40	CBF5	2.44314	1.71608
A6	1	CBF5	0.578456	-0.00684713
A6	2	CBF5	0.58201	-0.00443263
A6	3	CBF5	0.583198	-0.00438468
A6	4	CBF5	0.586428	-0.00229509
A6	5	CBF5	0.587386	-0.00247662
A6	6	CBF5	0.590417	-0.000585989
A6	7	CBF5	0.593452	0.00130965
A6	8	CBF5	0.593981	0.000698313
A6	9	CBF5	0.596148	0.00172611
A6	10	CBF5	0.596977	0.00141518
A6	11	CBF5	0.597853	0.00115104
A6	12	CBF5	0.600106	0.00226413
A6	13	CBF5	0.600505	0.00152262
A6	14	CBF5	0.602476	0.00235413
A6	15	CBF5	0.603148	0.00188656
A6	16	CBF5	0.603722	0.00131987
A6	17	CBF5	0.604504	0.000962573
A6	18	CBF5	0.605475	0.000793028
A6	19	CBF5	0.607316	0.00149449
A6	20	CBF5	0.606811	-0.000150275
A6	21	CBF5	0.606172	-0.00192944
A6	22	CBF5	0.60726	-0.00198073
A6	23	CBF5	0.609537	-0.000844042
A6	24	CBF5	0.608132	-0.00338853
A6	25	CBF5	0.611562	-0.00109861
A6	26	CBF5	0.613643	-0.000157604
A6	27	CBF5	0.61381	-0.00113038
A6	28	CBF5	0.617605	0.00152432
A6	29	CBF5	0.625154	0.00793364
A6	30	CBF5	0.642001	0.0236406
A6	31	CBF5	0.668975	0.0494745
A6	32	CBF5	0.723497	0.102857
A6	33	CBF5	0.822091	0.200311
A6	34	CBF5	0.991472	0.368551
A6	35	CBF5	1.25128	0.627225
A6	36	CBF5	1.58554	0.960343
A6	37	CBF5	1.94302	1.31668
A6	38	CBF5	2.26385	1.63637
A6	39	CBF5	2.48799	1.85937
A6	40	CBF5	2.66304	2.03328
A7	1	CBF5	0.6483	-0.00575786
A7	2	CBF5	0.649523	-0.00553375
A7	3	CBF5	0.650773	-0.00528287
A7	4	CBF5	0.653696	-0.00336002
A7	5	CBF5	0.656825	-0.00123005
A7	6	CBF5	0.658365	-0.00068896
A7	7	CBF5	0.65967	-0.000383307
A7	8	CBF5	0.662083	0.00102998
A7	9	CBF5	0.663444	0.00139142
A7	10	CBF5	0.665142	0.00209088
A7	11	CBF5	0.664517	0.000465881
A7	12	CBF5	0.669122	0.00407143
A7	13	CBF5	0.668453	0.00240297
A7	14	CBF5	0.670215	0.00316579
A7	15	CBF5	0.669374	0.00132592
A7	16	CBF5	0.670797	0.00174988
A7	17	CBF5	0.671364	0.00131757
A7	18	CBF5	0.67082	-0.000226188
A7	19	CBF5	0.671901	-0.000144887
A7	20	CBF5	0.672616	-0.000428366
A7	21	CBF5	0.674412	0.000367773
A7	22	CBF5	0.675215	0.000171078
A7	23	CBF5	0.675467	-0.000575947
A7	24	CBF5	0.674806	-0.00223588
A7	25	CBF5	0.676382	-0.00165926
A7	26	CBF5	0.676573	-0.00246833
A7	27	CBF5	0.67855	-0.0014901
A7	28	CBF5	0.681663	0.000623597
A7	29	CBF5	0.687409	0.00536992
A7	30	CBF5	0.699403	0.0163646
A7	31	CBF5	0.718576	0.0345388
A7	32	CBF5	0.757167	0.07213
A7	33	CBF5	0.831611	0.145574
A7	34	CBF5	0.958838	0.271802
A7	35	CBF5	1.16704	0.479008
A7	36	CBF5	1.4559	0.766862
A7	37	CBF5	1.78988	1.09985
A7	38	CBF5	2.10606	1.41503
A7	39	CBF5	2.35104	1.65901
A7	40	CBF5	2.52149	1.82846
A8	1	CBF6	0.666082	0.000328377
A8	2	CBF6	0.666104	-0.000754527
A8	3	CBF6	0.666968	-0.000994859
A8	4	CBF6	0.667906	-0.00116223
A8	5	CBF6	0.669444	-0.000728737
A8	6	CBF6	0.671949	0.000671251
A8	7	CBF6	0.673258	0.000875629
A8	8	CBF6	0.673822	0.00033483
A8	9	CBF6	0.674821	0.000229026
A8	10	CBF6	0.676859	0.00116201
A8	11	CBF6	0.677597	0.000795556
A8	12	CBF6	0.680052	0.00214548
A8	13	CBF6	0.677741	-0.00127077
A8	14	CBF6	0.681227	0.00111031
A8	15	CBF6	0.681737	0.000516104
A8	16	CBF6	0.681418	-0.000908453
A8	17	CBF6	0.681046	-0.00238439
A8	18	CBF6	0.682803	-0.00173304
A8	19	CBF6	0.684593	-0.00104747
A8	20	CBF6	0.687266	0.000520842
A8	21	CBF6	0.689719	0.00186891
A8	22	CBF6	0.696342	0.00738663
A8	23	CBF6	0.709497	0.0194369
A8	24	CBF6	0.731724	0.0405594
A8	25	CBF6	0.777161	0.084891
A8	26	CBF6	0.856491	0.163117
A8	27	CBF6	0.992271	0.297792
A8	28	CBF6	1.20331	0.507727
A8	29	CBF6	1.46617	0.769481
A8	30	CBF6	1.74645	1.04866
A8	31	CBF6	1.99233	1.29344
A8	32	CBF6	2.19802	1.49802
A8	33	CBF6	2.36518	1.66407
A8	34	CBF6	2.51293	1.81072
A8	35	CBF6	2.6283	1.92499
A8	36	CBF6	2.71488	2.01046
A8	37	CBF6	2.78961	2.08408
A8	38	CBF6	2.84192	2.13529
A8	39	CBF6	2.88844	2.1807
A8	40	CBF6	2.91925	2.21041
A9	1	CBF6	0.667878	0.000843163
A9	2	CBF6	0.668653	0.000392654
A9	3	CBF6	0.668679	-0.000806965
A9	4	CBF6	0.670218	-0.000492806
A9	5	CBF6	0.671772	-0.000164401
A9	6	CBF6	0.672388	-0.000773041
A9	7	CBF6	0.675247	0.000859871
A9	8	CBF6	0.675809	0.000197289
A9	9	CBF6	0.677741	0.00090329
A9	10	CBF6	0.678581	0.000518108
A9	11	CBF6	0.679756	0.00046844
A9	12	CBF6	0.681928	0.001415
A9	13	CBF6	0.681251	-0.000487175
A9	14	CBF6	0.68449	0.00152607
A9	15	CBF6	0.684546	0.000357091
A9	16	CBF6	0.684643	-0.000771658
A9	17	CBF6	0.684739	-0.00190053
A9	18	CBF6	0.685637	-0.00222801
A9	19	CBF6	0.688106	-0.000984557
A9	20	CBF6	0.69007	-0.000246072
A9	21	CBF6	0.694151	0.00261005
A9	22	CBF6	0.699087	0.00632018
A9	23	CBF6	0.710768	0.0167766
A9	24	CBF6	0.731845	0.0366278
A9	25	CBF6	0.772872	0.0764298
A9	26	CBF6	0.84399	0.146322
A9	27	CBF6	0.967715	0.268822
A9	28	CBF6	1.15427	0.454156
A9	29	CBF6	1.39693	0.695588
A9	30	CBF6	1.65249	0.949918
A9	31	CBF6	1.8892	1.18541
A9	32	CBF6	2.08016	1.37514
A9	33	CBF6	2.24591	1.53967
A9	34	CBF6	2.387	1.67953
A9	35	CBF6	2.49896	1.79026
A9	36	CBF6	2.59157	1.88165
A9	37	CBF6	2.66193	1.95078
A9	38	CBF6	2.72422	2.01185
A9	39	CBF6	2.76879	2.05519
A9	40	CBF6	2.79379	2.07897
A10	1	CBF6	0.765043	0.00717367
A10	2	CBF6	0.76199	0.00276854
A10	3	CBF6	0.76186	0.00128599
A10	4	CBF6	0.763054	0.00112674
A10	5	CBF6	0.761581	-0.00169888
A10	6	CBF6	0.764142	-0.000490209
A10	7	CBF6	0.766832	0.000847444
A10	8	CBF6	0.767907	0.000568976
A10	9	CBF6	0.769399	0.000708575
A10	10	CBF6	0.770122	7.90354e-05
A10	11	CBF6	0.772293	0.000897293
A10	12	CBF6	0.772853	0.000104973
A10	13	CBF6	0.773826	-0.000274942
A10	14	CBF6	0.773873	-0.00158064
A10	15	CBF6	0.774759	-0.00204674
A10	16	CBF6	0.778507	0.000348001
A10	17	CBF6	0.777511	-0.00200077
A10	18	CBF6	0.779102	-0.00176223
A10	19	CBF6	0.780194	-0.00202276
A10	20	CBF6	0.78322	-0.000349413
A10	21	CBF6	0.786353	0.00143057
A10	22	CBF6	0.791104	0.00482899
A10	23	CBF6	0.800606	0.0129789
A10	24	CBF6	0.819763	0.0307833
A10	25	CBF6	0.855702	0.0653692
A10	26	CBF6	0.921619	0.129933
A10	27	CBF6	1.03057	0.23753
A10	28	CBF6	1.19627	0.401876
A10	29	CBF6	1.41504	0.619299
A10	30	CBF6	1.65269	0.855592
A10	31	CBF6	1.86547	1.06702
A10	32	CBF6	2.04218	1.24238
A10	33	CBF6	2.20276	1.40161
A10	34	CBF6	2.3405	1.53799
A10	35	CBF6	2.45026	1.6464
A10	36	CBF6	2.53907	1.73386
A10	37	CBF6	2.61173	1.80517
A10	38	CBF6	2.67192	1.864
A10	39	CBF6	2.71162	1.90235
A10	40	CBF6	2.75032	1.9397
A11	1
A11	2
A11	3
A11	4
A11	5
A11	6
A11	7
A11	8
A11	9
A11	10
A11	11
A11	12
A11	13
A11	14
A11	15
A11	16
A11	17
A11	18
A11	19
A11	20
A11	21
A11	22
A11	23
A11	24
A11	25
A11	26
A11	27
A11	28
A11	29
A11	30
A11	31
A11	32
A11	33
A11	34
A11	35
A11	36
A11	37
A11	38
A11	39
A11	40
A12	1
A12	2
A12	3
A12	4
A12	5
A12	6
A12	7
A12	8
A12	9
A12	10
A12	11
A12	12
A12	13
A12	14
A12	15
A12	16
A12	17
A12	18
A12	19
A12	20
A12	21
A12	22
A12	23
A12	24
A12	25
A12	26
A12	27
A12	28
A12	29
A12	30
A12	31
A12	32
A12	33
A12	34
A12	35
A12	36
A12	37
A12	38
A12	39
A12	40
B1	1
B1	2
B1	3
B1	4
B1	5
B1	6
B1	7
B1	8
B1	9
B1	10
B1	11
B1	12
B1	13
B1	14
B1	15
B1	16
B1	17
B1	18
B1	19
B1	20
B1	21
B1	22
B1	23
B1	24
B1	25
B1	26
B1	27
B1	28
B1	29
B1	30
B1	31
B1	32
B1	33
B1	34
B1	35
B1	36
B1	37
B1	38
B1	39
B1	40
B2	1	CBF5	0.72394	-0.00550618
B2	2	CBF5	0.726329	-0.00409914
B2	3	CBF5	0.727885	-0.00352567
B2	4	CBF5	0.729981	-0.00241123
B2	5	CBF5	0.731362	-0.00201228
B2	6	CBF5	0.733376	-0.000980328
B2	7	CBF5	0.734957	-0.000381345
B2	8	CBF5	0.73628	-4.05702e-05
B2	9	CBF5	0.737517	0.000214672
B2	10	CBF5	0.739195	0.000909916
B2	11	CBF5	0.741984	0.00271685
B2	12	CBF5	0.741969	0.00171979
B2	13	CBF5	0.743288	0.00205753
B2	14	CBF5	0.743977	0.00176387
B2	15	CBF5	0.74506	0.00186474
B2	16	CBF5	0.745845	0.0016677
B2	17	CBF5	0.746033	0.000874439
B2	18	CBF5	0.746684	0.000543351
B2	19	CBF5	0.748689	0.00156576
B2	20	CBF5	0.749472	0.00136724
B2	21	CBF5	0.749469	0.000381808
B2	22	CBF5	0.749856	-0.000213508
B2	23	CBF5	0.751576	0.000525188
B2	24	CBF5	0.751341	-0.000691864
B2	25	CBF5	0.751709	-0.00130667
B2	26	CBF5	0.751573	-0.00242454
B2	27	CBF5	0.754069	-0.000910627
B2	28	CBF5	0.754004	-0.00195697
B2	29	CBF5	0.75405	-0.00289299
B2	30	CBF5	0.756816	-0.00110942
B2	31	CBF5	0.761593	0.00268514
B2	32	CBF5	0.768149	0.00825903
B2	33	CBF5	0.780034	0.0191626
B2	34	CBF5	0.807023	0.0451693
B2	35	CBF5	0.856193	0.0933572
B2	36	CBF5	0.942664	0.178847
B2	37	CBF5	1.08963	0.324828
B2	38	CBF5	1.31322	0.547434
B2	39	CBF5	1.58738	0.820619
B2	40	CBF5	1.86648	1.09874
B3	1	CBF5	0.601404	-0.0035555
B3	2	CBF5	0.602582	-0.003555
B3	3	CBF5	0.604397	-0.00291752
B3	4	CBF5	0.606631	-0.00186172
B3	5	CBF5	0.608398	-0.00127192
B3	6	CBF5	0.609478	-0.00137019
B3	7	CBF5	0.610621	-0.00140457
B3	8	CBF5	0.612744	-0.000459697
B3	9	CBF5	0.615819	0.00143789
B3	10	CBF5	0.617774	0.00221533
B3	11	CBF5	0.61848	0.00174417
B3	12	CBF5	0.620215	0.00230161
B3	13	CBF5	0.621879	0.00278735
B3	14	CBF5	0.621817	0.00154777
B3	15	CBF5	0.622103	0.000655858
B3	16	CBF5	0.624039	0.00141476
B3	17	CBF5	0.625849	0.00204712
B3	18	CBF5	0.624598	-0.000381691
B3	19	CBF5	0.625302	-0.000855711
B3	20	CBF5	0.626965	-0.000370572
B3	21	CBF5	0.629166	0.000653035
B3	22	CBF5	0.62949	-0.000199891
B3	23	CBF5	0.629914	-0.000953814
B3	24	CBF5	0.631273	-0.000772958
B3	25	CBF5	0.632204	-0.00101911
B3	26	CBF5	0.631807	-0.00259385
B3	27	CBF5	0.634521	-0.00105728
B3	28	CBF5	0.63625	-0.000505983
B3	29	CBF5	0.639126	0.00119157
B3	30	CBF5	0.64746	0.00834886
B3	31	CBF5	0.660204	0.0199145
B3	32	CBF5	0.686679	0.0452122
B3	33	CBF5	0.738688	0.0960437
B3	34	CBF5	0.82787	0.184048
B3	35	CBF5	0.982548	0.337548
B3	36	CBF5	1.22202	0.575842
B3	37	CBF5	1.52732	0.879966
B3	38	CBF5	1.84772	1.19919
B3	39	CBF5	2.12575	1.47604
B3	40	CBF5	2.33415	1.68326
B4	1	CBF5	0.596131	-0.00772981
B4	2	CBF5	0.599518	-0.00542046
B4	3	CBF5	0.601869	-0.0041475
B4	4	CBF5	0.603788	-0.00330669
B4	5	CBF5	0.606292	-0.00188067
B4	6	CBF5	0.608522	-0.000728541
B4	7	CBF5	0.609401	-0.00092854
B4	8	CBF5	0.611311	-9.64855e-05
B4	9	CBF5	0.613727	0.00124209
B4	10	CBF5	0.614986	0.00142302
B4	11	CBF5	0.615023	0.000382181
B4	12	CBF5	0.618214	0.00249431
B4	13	CBF5	0.618202	0.001405
B4	14	CBF5	0.620322	0.00244621
B4	15	CBF5	0.621708	0.00275422
B4	16	CBF5	0.621107	0.00107537
B4	17	CBF5	0.622677	0.00156804
B4	18	CBF5	0.624025	0.00183802
B4	19	CBF5	0.625276	0.00201085
B4	20	CBF5	0.625462	0.00111896
B4	21	CBF5	0.627912	0.00248996
B4	22	CBF5	0.626945	0.000445853
B4	23	CBF5	0.625964	-0.00161405
B4	24	CBF5	0.628137	-0.000518662
B4	25	CBF5	0.629333	-0.000401147
B4	26	CBF5	0.629315	-0.00149623
B4	27	CBF5	0.631217	-0.000672579
B4	28	CBF5	0.629548	-0.00342014
B4	29	CBF5	0.631716	-0.0023297
B4	30	CBF5	0.6327	-0.00242378
B4	31	CBF5	0.634436	-0.00176607
B4	32	CBF5	0.636328	-0.000952433
B4	33	CBF5	0.642347	0.00398912
B4	34	CBF5	0.650353	0.0109174
B4	35	CBF5	0.668419	0.0279049
B4	36	CBF5	0.703367	0.061775
B4	37	CBF5	0.767049	0.124379
B4	38	CBF5	0.880512	0.236763
B4	39	CBF5	1.06703	0.4222
B4	40	CBF5	1.34161	0.695709
B5	1	CBF5	0.587698	-0.00800284
B5	2	CBF5	0.590971	-0.00583577
B5	3	CBF5	0.592864	-0.00504754
B5	4	CBF5	0.598083	-0.000934443
B5	5	CBF5	0.598632	-0.00149137
B5	6	CBF5	0.600066	-0.00116287
B5	7	CBF5	0.602885	0.000551145
B5	8	CBF5	0.604523	0.00108355
B5	9	CBF5	0.605847	0.00130209
B5	10	CBF5	0.607447	0.00179635
B5	11	CBF5	0.607885	0.0011282
B5	12	CBF5	0.612217	0.00435498
B5	13	CBF5	0.61057	0.00160192
B5	14	CBF5	0.610737	0.000663881
B5	15	CBF5	0.612565	0.00138655
B5	16	CBF5	0.612614	0.000329063
B5	17	CBF5	0.614067	0.000676877
B5	18	CBF5	0.615178	0.000681904
B5	19	CBF5	0.61536	-0.000241411
B5	20	CBF5	0.616213	-0.000493995
B5	21	CBF5	0.61692	-0.000892849
B5	22	CBF5	0.616843	-0.00207544
B5	23	CBF5	0.617477	-0.00254642
B5	24	CBF5	0.620459	-0.000670164
B5	25	CBF5	0.625356	0.00312125
B5	26	CBF5	0.635542	0.0122013
B5	27	CBF5	0.650018	0.025572
B5	28	CBF5	0.681494	0.0559429
B5	29	CBF5	0.739852	0.113195
B5	30	CBF5	0.844079	0.216317
B5	31	CBF5	1.01938	0.390516
B5	32	CBF5	1.27746	0.647482
B5	33	CBF5	1.59281	0.961734
B5	34	CBF5	1.90767	1.27548
B5	35	CBF5	2.17216	1.53887
B5	36	CBF5	2.3725	1.7381
B5	37	CBF5	2.51388	1.87838
B5	38	CBF5	2.62261	1.986
B5	39	CBF5	2.71914	2.08143
B5	40	CBF5	2.78594	2.14712
B6	1	CBF5	0.600732	-0.00321032
B6	2	CBF5	0.603776	-0.0011688
B6	3	CBF5	0.603299	-0.00264776
B6	4	CBF5	0.605294	-0.00165409
B6	5	CBF5	0.608277	0.000326873
B6	6	CBF5	0.608442	-0.000509854
B6	7	CBF5	0.611368	0.00141371
B6	8	CBF5	0.612762	0.00180585
B6	9	CBF5	0.61466	0.00270237
B6	10	CBF5	0.612912	-4.80223e-05
B6	11	CBF5	0.615497	0.00153472
B6	12	CBF5	0.614619	-0.000344667
B6	13	CBF5	0.616641	0.000674993
B6	14	CBF5	0.61711	0.000142548
B6	15	CBF5	0.617778	-0.00019183
B6	16	CBF5	0.619745	0.000773113
B6	17	CBF5	0.619962	-1.12206e-05
B6	18	CBF5	0.619705	-0.00127031
B6	19	CBF5	0.620875	-0.00110281
B6	20	CBF5	0.621505	-0.00147444
B6	21	CBF5	0.622547	-0.00143415
B6	22	CBF5	0.623741	-0.00124269
B6	23	CBF5	0.625673	-0.000312619
B6	24	CBF5	0.625808	-0.00117962
B6	25	CBF5	0.632039	0.00404991
B6	26	CBF5	0.641162	0.0121711
B6	27	CBF5	0.657895	0.0279015
B6	28	CBF5	0.691329	0.0603344
B6	29	CBF5	0.749377	0.11738
B6	30	CBF5	0.856568	0.223569
B6	31	CBF5	1.03247	0.398472
B6	32	CBF5	1.29099	0.655983
B6	33	CBF5	1.60258	0.966573
B6	34	CBF5	1.91243	1.27543
B6	35	CBF5	2.16411	1.5261
B6	36	CBF5	2.34961	1.7106
B6	37	CBF5	2.48887	1.84885
B6	38	CBF5	2.59622	1.95521
B6	39	CBF5	2.68277	2.04076
B6	40	CBF5	2.74892	2.1059
B7	1	CBF5	0.655687	-0.00718007
B7	2	CBF5	0.660213	-0.00374844
B7	3	CBF5	0.662556	-0.00249952
B7	4	CBF5	0.664412	-0.00173746
B7	5	CBF5	0.668187	0.000943757
B7	6	CBF5	0.667881	-0.000456218
B7	7	CBF5	0.670242	0.000811233
B7	8	CBF5	0.670846	0.000321599
B7	9	CBF5	0.673504	0.00188558
B7	10	CBF5	0.672957	0.000244865
B7	11	CBF5	0.67492	0.00111362
B7	12	CBF5	0.676436	0.00153612
B7	13	CBF5	0.676482	0.000487452
B7	14	CBF5	0.679048	0.0019597
B7	15	CBF5	0.67933	0.00114844
B7	16	CBF5	0.678839	-0.000436961
B7	17	CBF5	0.678606	-0.00176416
B7	18	CBF5	0.681395	-6.83293e-05
B7	19	CBF5	0.681144	-0.00141412
B7	20	CBF5	0.682674	-0.000977919
B7	21	CBF5	0.683032	-0.00171336
B7	22	CBF5	0.684214	-0.00162507
B7	23	CBF5	0.685521	-0.00141244
B7	24	CBF5	0.687386	-0.000641377
B7	25	CBF5	0.693416	0.00429456
B7	26	CBF5	0.701241	0.0110259
B7	27	CBF5	0.718866	0.0275568
B7	28	CBF5	0.748868	0.0564648
B7	29	CBF5	0.808632	0.115135
B7	30	CBF5	0.912395	0.217805
B7	31	CBF5	1.08871	0.393027
B7	32	CBF5	1.34651	0.64973
B7	33	CBF5	1.66326	0.965387
B7	34	CBF5	1.98986	1.2909
B7	35	CBF5	2.26343	1.56337
B7	36	CBF5	2.45554	1.75439
B7	37	CBF5	2.6116	1.90935
B7	38	CBF5	2.71691	2.01357
B7	39	CBF5	2.81588	2.11145
B7	40	CBF5	2.88582	2.18029
B8	1	CBF6	0.700628	-0.0001761
B8	2	CBF6	0.700169	-0.0010032
B8	3	CBF6	0.699281	-0.00226071
B8	4	CBF6	0.701566	-0.000344746
B8	5	CBF6	0.702178	-0.000101289
B8	6	CBF6	0.702786	0.000137519
B8	7	CBF6	0.701705	-0.00131257
B8	8	CBF6	0.704433	0.00104679
B8	9	CBF6	0.704518	0.000762151
B8	10	CBF6	0.705064	0.000939865
B8	11	CBF6	0.705884	0.00139009
B8	12	CBF6	0.706405	0.00154223
B8	13	CBF6	0.705357	0.000125224
B8	14	CBF6	0.707112	0.00151172
B8	15	CBF6	0.706147	0.000177143
B8	16	CBF6	0.706069	-0.000269264
B8	17	CBF6	0.706453	-0.000254331
B8	18	CBF6	0.706705	-0.000371304
B8	19	CBF6	0.706808	-0.000637705
B8	20	CBF6	0.706374	-0.00143983
B8	21	CBF6	0.70673	-0.00145345
B8	22	CBF6	0.707337	-0.0012153
B8	23	CBF6	0.710949	0.00202776
B8	24	CBF6	0.717373	0.00808249
B8	25	CBF6	0.728636	0.0189763
B8	26	CBF6	0.751348	0.0413198
B8	27	CBF6	0.795355	0.0849583
B8	28	CBF6	0.871498	0.160732
B8	29	CBF6	1.00366	0.292529
B8	30	CBF6	1.20017	0.488668
B8	31	CBF6	1.44334	0.731465
B8	32	CBF6	1.68106	0.968822
B8	33	CBF6	1.90413	1.19152
B8	34	CBF6	2.07869	1.36571
B8	35	CBF6	2.23203	1.51868
B8	36	CBF6	2.34767	1.63395
B8	37	CBF6	2.44784	1.73375
B8	38	CBF6	2.52654	1.81208
B8	39	CBF6	2.59903	1.88421
B8	40	CBF6	2.64918	1.93399
B9	1	CBF6	0.695848	0.00366146
B9	2	CBF6	0.692974	-0.000299853
B9	3	CBF6	0.693457	-0.000904892
B9	4	CBF6	0.69396	-0.00148973
B9	5	CBF6	0.695617	-0.000920374
B9	6	CBF6	0.697315	-0.000309837
B9	7	CBF6	0.697799	-0.000913386
B9	8	CBF6	0.700879	0.00107897
B9	9	CBF6	0.702455	0.0015666
B9	10	CBF6	0.702257	0.000281232
B9	11	CBF6	0.704027	0.000963773
B9	12	CBF6	0.705637	0.0014855
B9	13	CBF6	0.707122	0.00188355
B9	14	CBF6	0.707609	0.0012822
B9	15	CBF6	0.707483	6.82422e-05
B9	16	CBF6	0.709501	0.000998857
B9	17	CBF6	0.708282	-0.00130819
B9	18	CBF6	0.709345	-0.00133244
B9	19	CBF6	0.710465	-0.00130019
B9	20	CBF6	0.712005	-0.000847844
B9	21	CBF6	0.712777	-0.00116356
B9	22	CBF6	0.71487	-0.000158323
B9	23	CBF6	0.717156	0.00103986
B9	24	CBF6	0.725847	0.00864363
B9	25	CBF6	0.737169	0.0188779
B9	26	CBF6	0.761823	0.0424439
B9	27	CBF6	0.806488	0.0860212
B9	28	CBF6	0.886446	0.164892
B9	29	CBF6	1.02484	0.302197
B9	30	CBF6	1.23098	0.507249
B9	31	CBF6	1.49124	0.766424
B9	32	CBF6	1.76449	1.03858
B9	33	CBF6	2.00397	1.27698
B9	34	CBF6	2.20973	1.48165
B9	35	CBF6	2.38596	1.6568
B9	36	CBF6	2.52719	1.79693
B9	37	CBF6	2.64632	1.91498
B9	38	CBF6	2.74195	2.00952
B9	39	CBF6	2.82874	2.09522
B9	40	CBF6	2.89468	2.16007
B10	1	CBF6	0.788233	0.00713701
B10	2	CBF6	0.785196	0.0033455
B10	3	CBF6	0.783129	0.000524716
B10	4	CBF6	0.784048	0.000690422
B10	5	CBF6	0.782638	-0.00147328
B10	6	CBF6	0.783477	-0.00138786
B10	7	CBF6	0.785313	-0.000305618
B10	8	CBF6	0.787566	0.00119356
B10	9	CBF6	0.787718	0.000592157
B10	10	CBF6	0.788289	0.000409771
B10	11	CBF6	0.788874	0.00024026
B10	12	CBF6	0.790351	0.000963567
B10	13	CBF6	0.790675	0.000534537
B10	14	CBF6	0.791707	0.000812717
B10	15	CBF6	0.790898	-0.000750053
B10	16	CBF6	0.79246	5.76542e-05
B10	17	CBF6	0.792516	-0.000639119
B10	18	CBF6	0.792989	-0.000919793
B10	19	CBF6	0.79351	-0.00115266
B10	20	CBF6	0.793759	-0.00165751
B10	21	CBF6	0.794717	-0.001453
B10	22	CBF6	0.797171	0.000247165
B10	23	CBF6	0.80115	0.00347238
B10	24	CBF6	0.805482	0.00705021
B10	25	CBF6	0.817036	0.0178509
B10	26	CBF6	0.838802	0.0388628
B10	27	CBF6	0.881126	0.0804331
B10	28	CBF6	0.953713	0.152267
B10	29	CBF6	1.0781	0.275897
B10	30	CBF6	1.26485	0.461894
B10	31	CBF6	1.50233	0.698624
B10	32	CBF6	1.74352	0.939063
B10	33	CBF6	1.97035	1.16514
B10	34	CBF6	2.16512	1.35915
B10	35	CBF6	2.33171	1.52499
B10	36	CBF6	2.47582	1.66835
B10	37	CBF6	2.59635	1.78813
B10	38	CBF6	2.68982	1.88084
B10	39	CBF6	2.77226	1.96252
B10	40	CBF6	2.83922	2.02873
B11	1
B11	2
B11	3
B11	4
B11	5
B11	6
B11	7
B11	8
B11	9
B11	10
B11	11
B11	12
B11	13
B11	14
B11	15
B11	16
B11	17
B11	18
B11	19
B11	20
B11	21
B11	22
B11	23
B11	24
B11	25
B11	26
B11	27
B11	28
B11	29
B11	30
B11	31
B11	32
B11	33
B11	34
B11	35
B11	36
B11	37
B11	38
B11	39
B11	40
B12	1
B12	2
B12	3
B12	4
B12	5
B12	6
B12	7
B12	8
B12	9
B12	10
B12	11
B12	12
B12	13
B12	14
B12	15
B12	16
B12	17
B12	18
B12	19
B12	20
B12	21
B12	22
B12	23
B12	24
B12	25
B12	26
B12	27
B12	28
B12	29
B12	30
B12	31
B12	32
B12	33
B12	34
B12	35
B12	36
B12	37
B12	38
B12	39
B12	40
C1	1
C1	2
C1	3
C1	4
C1	5
C1	6
C1	7
C1	8
C1	9
C1	10
C1	11
C1	12
C1	13
C1	14
C1	15
C1	16
C1	17
C1	18
C1	19
C1	20
C1	21
C1	22
C1	23
C1	24
C1	25
C1	26
C1	27
C1	28
C1	29
C1	30
C1	31
C1	32
C1	33
C1	34
C1	35
C1	36
C1	37
C1	38
C1	39
C1	40
C2	1	CBF5	0.743548	-0.00271217
C2	2	CBF5	0.743556	-0.00379108
C2	3	CBF5	0.745588	-0.00284563
C2	4	CBF5	0.74632	-0.00320082
C2	5	CBF5	0.749134	-0.00147312
C2	6	CBF5	0.750558	-0.00113641
C2	7	CBF5	0.752148	-0.000633174
C2	8	CBF5	0.753556	-0.000311967
C2	9	CBF5	0.756421	0.00146616
C2	10	CBF5	0.755953	-8.87509e-05
C2	11	CBF5	0.758673	0.00154489
C2	12	CBF5	0.760175	0.0019595
C2	13	CBF5	0.760802	0.00149971
C2	14	CBF5	0.763054	0.00266539
C2	15	CBF5	0.763701	0.00222533
C2	16	CBF5	0.765645	0.00308232
C2	17	CBF5	0.765807	0.00215791
C2	18	CBF5	0.765326	0.000589774
C2	19	CBF5	0.767123	0.00129943
C2	20	CBF5	0.768021	0.00111089
C2	21	CBF5	0.767488	-0.000509102
C2	22	CBF5	0.769727	0.000643054
C2	23	CBF5	0.76829	-0.00188043
C2	24	CBF5	0.768945	-0.00231245
C2	25	CBF5	0.769752	-0.00259247
C2	26	CBF5	0.770611	-0.00282034
C2	27	CBF5	0.772853	-0.00166503
C2	28	CBF5	0.77683	0.00122532
C2	29	CBF5	0.783911	0.00721946
C2	30	CBF5	0.796413	0.0186344
C2	31	CBF5	0.819722	0.0408567
C2	32	CBF5	0.865752	0.0857995
C2	33	CBF5	0.947699	0.166661
C2	34	CBF5	1.09099	0.308861
C2	35	CBF5	1.30679	0.523577
C2	36	CBF5	1.59133	0.807028
C2	37	CBF5	1.89755	1.11217
C2	38	CBF5	2.15524	1.36877
C2	39	CBF5	2.35671	1.56915
C2	40	CBF5	2.503	1.71436
C3	1	CBF5	0.613203	-0.00450544
C3	2	CBF5	0.614623	-0.00423067
C3	3	CBF5	0.617151	-0.00284724
C3	4	CBF5	0.619123	-0.00202023
C3	5	CBF5	0.621273	-0.00101494
C3	6	CBF5	0.623887	0.000454675
C3	7	CBF5	0.624798	0.000220727
C3	8	CBF5	0.627085	0.00136257
C3	9	CBF5	0.628128	0.00126142
C3	10	CBF5	0.628684	0.000672528
C3	11	CBF5	0.629068	-8.86233e-05
C3	12	CBF5	0.630862	0.000561127
C3	13	CBF5	0.633183	0.0017373
C3	14	CBF5	0.634035	0.00144423
C3	15	CBF5	0.635151	0.0014158
C3	16	CBF5	0.63641	0.00152988
C3	17	CBF5	0.636062	3.67823e-05
C3	18	CBF5	0.63742	0.000250524
C3	19	CBF5	0.636733	-0.00158166
C3	20	CBF5	0.640165	0.000706022
C3	21	CBF5	0.641519	0.000915174
C3	22	CBF5	0.64045	-0.00129836
C3	23	CBF5	0.641874	-0.00101924
C3	24	CBF5	0.642439	-0.00159955
C3	25	CBF5	0.643986	-0.00119692
C3	26	CBF5	0.645063	-0.00126499
C3	27	CBF5	0.646683	-0.000790117
C3	28	CBF5	0.650771	0.0021531
C3	29	CBF5	0.656254	0.00649202
C3	30	CBF5	0.670677	0.0197698
C3	31	CBF5	0.693202	0.0411507
C3	32	CBF5	0.736713	0.0835167
C3	33	CBF5	0.81932	0.164979
C3	34	CBF5	0.965219	0.309733
C3	35	CBF5	1.19258	0.535952
C3	36	CBF5	1.50182	0.844042
C3	37	CBF5	1.84153	1.18261
C3	38	CBF5	2.15	1.48994
C3	39	CBF5	2.38174	1.72053
C3	40	CBF5	2.55638	1.89403
C4	1	CBF5	0.603438	-0.00603546
C4	2	CBF5	0.605041	-0.00570456
C4	3	CBF5	0.608985	-0.00303335
C4	4	CBF5	0.611052	-0.00223844
C4	5	CBF5	0.613523	-0.00103964
C4	6	CBF5	0.615715	-0.000120266
C4	7	CBF5	0.616251	-0.000856294
C4	8	CBF5	0.619338	0.000957981
C4	9	CBF5	0.621054	0.00140135
C4	10	CBF5	0.621094	0.000169828
C4	11	CBF5	0.623955	0.00175814
C4	12	CBF5	0.625596	0.00212629
C4	13	CBF5	0.626819	0.00207744
C4	14	CBF5	0.62803	0.00201572
C4	15	CBF5	0.628631	0.00134454
C4	16	CBF5	0.629531	0.000972164
C4	17	CBF5	0.629117	-0.000714499
C4	18	CBF5	0.63152	0.00041635
C4	19	CBF5	0.633489	0.00111292
C4	20	CBF5	0.634472	0.000823985
C4	21	CBF5	0.634223	-0.000697811
C4	22	CBF5	0.634868	-0.00132494
C4	23	CBF5	0.635742	-0.00172349
C4	24	CBF5	0.637128	-0.00160985
C4	25	CBF5	0.637769	-0.00224116
C4	26	CBF5	0.639145	-0.00213729
C4	27	CBF5	0.641349	-0.00120511
C4	28	CBF5	0.647592	0.00376541
C4	29	CBF5	0.65364	0.0085412
C4	30	CBF5	0.668665	0.0222929
C4	31	CBF5	0.698076	0.0504318
C4	32	CBF5	0.751344	0.102428
C4	33	CBF5	0.846071	0.195882
C4	34	CBF5	1.01209	0.360633
C4	35	CBF5	1.27054	0.61781
C4	36	CBF5	1.60028	0.946271
C4	37	CBF5	1.95769	1.30242
C4	38	CBF5	2.26701	1.61046
C4	39	CBF5	2.4972	1.83937
C4	40	CBF5	2.66728	2.00819
C5	1	CBF5	0.565952	-0.00783412
C5	2	CBF5	0.569622	-0.00486704
C5	3	CBF5	0.573559	-0.00163294
C5	4	CBF5	0.573615	-0.00227988
C5	5	CBF5	0.575779	-0.00081842
C5	6	CBF5	0.578023	0.000722014
C5	7	CBF5	0.578545	0.000541305
C5	8	CBF5	0.580581	0.00187438
C5	9	CBF5	0.580223	0.000813723
C5	10	CBF5	0.581659	0.00154604
C5	11	CBF5	0.581805	0.00098976
C5	12	CBF5	0.582072	0.00055299
C5	13	CBF5	0.583154	0.000932922
C5	14	CBF5	0.583418	0.000493172
C5	15	CBF5	0.583805	0.000177756
C5	16	CBF5	0.58474	0.000409392
C5	17	CBF5	0.582666	-0.00236764
C5	18	CBF5	0.583631	-0.0021053
C5	19	CBF5	0.58586	-0.000579114
C5	20	CBF5	0.586883	-0.00025974
C5	21	CBF5	0.588835	0.000989586
C5	22	CBF5	0.59526	0.00671158
C5	23	CBF5	0.605482	0.0162305
C5	24	CBF5	0.625206	0.0352523
C5	25	CBF5	0.66155	0.070893
C5	26	CBF5	0.728588	0.137227
C5	27	CBF5	0.84379	0.251727
C5	28	CBF5	1.01929	0.426527
C5	29	CBF5	1.24981	0.656344
C5	30	CBF5	1.49679	0.902617
C5	31	CBF5	1.70846	1.11359
C5	32	CBF5	1.86512	1.26954
C5	33	CBF5	1.98203	1.38574
C5	34	CBF5	2.06395	1.46696
C5	35	CBF5	2.13517	1.53748
C5	36	CBF5	2.19003	1.59164
C5	37	CBF5	2.22477	1.62568
C5	38	CBF5	2.26463	1.66483
C5	39	CBF5	2.29592	1.69542
C5	40	CBF5	2.31378	1.71258
C6	1	CBF5	0.643512	-0.00601364
C6	2	CBF5	0.644023	-0.00512169
C6	3	CBF5	0.645832	-0.00293142
C6	4	CBF5	0.646316	-0.00206682
C6	5	CBF5	0.648114	0.000112473
C6	6	CBF5	0.648827	0.00120613
C6	7	CBF5	0.648755	0.00151521
C6	8	CBF5	0.647287	0.000428295
C6	9	CBF5	0.648081	0.00160379
C6	10	CBF5	0.647881	0.00178478
C6	11	CBF5	0.647789	0.00207443
C6	12	CBF5	0.646209	0.000875279
C6	13	CBF5	0.645334	0.00038089
C6	14	CBF5	0.644166	-0.000405442
C6	15	CBF5	0.6431	-0.00109063
C6	16	CBF5	0.643082	-0.000728018
C6	17	CBF5	0.640859	-0.00256935
C6	18	CBF5	0.641776	-0.00127131
C6	19	CBF5	0.6419	-0.000766546
C6	20	CBF5	0.641614	-0.000671385
C6	21	CBF5	0.644424	0.00251964
C6	22	CBF5	0.650093	0.00857002
C6	23	CBF5	0.662245	0.0211034
C6	24	CBF5	0.684277	0.0435161
C6	25	CBF5	0.727304	0.0869242
C6	26	CBF5	0.809044	0.169046
C6	27	CBF5	0.947383	0.307765
C6	28	CBF5	1.15951	0.520276
C6	29	CBF5	1.43475	0.795896
C6	30	CBF5	1.72578	1.08731
C6	31	CBF5	1.98559	1.3475
C6	32	CBF5	2.1784	1.54068
C6	33	CBF5	2.31599	1.67866
C6	34	CBF5	2.4299	1.79295
C6	35	CBF5	2.5169	1.88033
C6	36	CBF5	2.58323	1.94704
C6	37	CBF5	2.64382	2.00802
C6	38	CBF5	2.68457	2.04914
C6	39	CBF5	2.72267	2.08762
C6	40	CBF5	2.75865	2.12399
C7	1	CBF5	0.615589	-0.00649283
C7	2	CBF5	0.61798	-0.00516314
C7	3	CBF5	0.622092	-0.00211255
C7	4	CBF5	0.624819	-0.00044735
C7	5	CBF5	0.626842	0.000514695
C7	6	CBF5	0.627583	0.000193273
C7	7	CBF5	0.628507	5.56117e-05
C7	8	CBF5	0.629586	7.38167e-05
C7	9	CBF5	0.631503	0.000929169
C7	10	CBF5	0.632335	0.000699001
C7	11	CBF5	0.635269	0.00257186
C7	12	CBF5	0.633961	0.000202427
C7	13	CBF5	0.635702	0.000881171
C7	14	CBF5	0.635159	-0.000722765
C7	15	CBF5	0.637037	9.27715e-05
C7	16	CBF5	0.637002	-0.00100315
C7	17	CBF5	0.63796	-0.00110714
C7	18	CBF5	0.638892	-0.00123639
C7	19	CBF5	0.640298	-0.000892212
C7	20	CBF5	0.641022	-0.00122979
C7	21	CBF5	0.645851	0.00253755
C7	22	CBF5	0.651808	0.00743296
C7	23	CBF5	0.66254	0.0171038
C7	24	CBF5	0.685541	0.0390434
C7	25	CBF5	0.726335	0.0787757
C7	26	CBF5	0.802346	0.153724
C7	27	CBF5	0.933241	0.283559
C7	28	CBF5	1.13089	0.480147
C7	29	CBF5	1.39555	0.743744
C7	30	CBF5	1.68542	1.03255
C7	31	CBF5	1.93884	1.28491
C7	32	CBF5	2.12826	1.47327
C7	33	CBF5	2.27338	1.61732
C7	34	CBF5	2.38094	1.72383
C7	35	CBF5	2.46757	1.8094
C7	36	CBF5	2.52936	1.87012
C7	37	CBF5	2.58422	1.92393
C7	38	CBF5	2.62345	1.96209
C7	39	CBF5	2.66147	1.99905
C7	40	CBF5	2.69232	2.02884
C8	1	CBF6	0.714358	0.00274049
C8	2	CBF6	0.711994	-0.000875885
C8	3	CBF6	0.713451	-0.000670529
C8	4	CBF6	0.714416	-0.000958223
C8	5	CBF6	0.717424	0.00079733
C8	6	CBF6	0.717085	-0.0007935
C8	7	CBF6	0.719677	0.000546609
C8	8	CBF6	0.719486	-0.00089676
C8	9	CBF6	0.723068	0.00143249
C8	10	CBF6	0.722898	1.0637e-05
C8	11	CBF6	0.725443	0.0013036
C8	12	CBF6	0.725439	4.7508e-05
C8	13	CBF6	0.727698	0.00105359
C8	14	CBF6	0.728003	0.000107148
C8	15	CBF6	0.730006	0.000857528
C8	16	CBF6	0.730334	-6.63259e-05
C8	17	CBF6	0.730439	-0.0012134
C8	18	CBF6	0.731147	-0.00175805
C8	19	CBF6	0.73332	-0.000837259
C8	20	CBF6	0.735831	0.000421966
C8	21	CBF6	0.735405	-0.0012569
C8	22	CBF6	0.739787	0.00187254
C8	23	CBF6	0.745127	0.0059609
C8	24	CBF6	0.756775	0.0163566
C8	25	CBF6	0.778683	0.0370127
C8	26	CBF6	0.820804	0.077881
C8	27	CBF6	0.894452	0.150277
C8	28	CBF6	1.02685	0.28142
C8	29	CBF6	1.2321	0.485416
C8	30	CBF6	1.51232	0.764387
C8	31	CBF6	1.8267	1.07752
C8	32	CBF6	2.1066	1.35616
C8	33	CBF6	2.34805	1.59636
C8	34	CBF6	2.55172	1.79878
C8	35	CBF6	2.72361	1.96942
C8	36	CBF6	2.85161	2.09616
C8	37	CBF6	2.96372	2.20703
C8	38	CBF6	3.06376	2.30581
C8	39	CBF6	3.13428	2.37508
C8	40	CBF6	3.18819	2.42773
C9	1	CBF6	0.707781	0.00266105
C9	2	CBF6	0.705602	-0.00076585
C9	3	CBF6	0.706036	-0.0015801
C9	4	CBF6	0.708839	-2.47735e-05
C9	5	CBF6	0.708881	-0.00123093
C9	6	CBF6	0.711046	-0.000314321
C9	7	CBF6	0.712925	0.000316421
C9	8	CBF6	0.714941	0.00108449
C9	9	CBF6	0.715774	0.000668577
C9	10	CBF6	0.717063	0.000710068
C9	11	CBF6	0.718233	0.000631276
C9	12	CBF6	0.720268	0.00141788
C9	13	CBF6	0.720335	0.000236764
C9	14	CBF6	0.722582	0.00123604
C9	15	CBF6	0.721704	-0.000890288
C9	16	CBF6	0.724686	0.000843438
C9	17	CBF6	0.724838	-0.00025203
C9	18	CBF6	0.724648	-0.0016904
C9	19	CBF6	0.726629	-0.000957737
C9	20	CBF6	0.728265	-0.000570301
C9	21	CBF6	0.729429	-0.000653861
C9	22	CBF6	0.732351	0.00101978
C9	23	CBF6	0.737446	0.00486655
C9	24	CBF6	0.749537	0.0157094
C9	25	CBF6	0.768579	0.0335035
C9	26	CBF6	0.806322	0.0699976
C9	27	CBF6	0.877156	0.139584
C9	28	CBF6	0.994368	0.255547
C9	29	CBF6	1.18118	0.441114
C9	30	CBF6	1.43129	0.689969
C9	31	CBF6	1.71394	0.97137
C9	32	CBF6	1.96069	1.21687
C9	33	CBF6	2.17337	1.42831
C9	34	CBF6	2.36266	1.61635
C9	35	CBF6	2.5252	1.77764
C9	36	CBF6	2.65164	1.90283
C9	37	CBF6	2.75789	2.00784
C9	38	CBF6	2.83733	2.08603
C9	39	CBF6	2.9165	2.16395
C9	40	CBF6	2.97335	2.21955
C10	1	CBF6	0.802193	0.00392782
C10	2	CBF6	0.799255	4.51279e-05
C10	3	CBF6	0.799313	-0.000842487
C10	4	CBF6	0.799802	-0.00129803
C10	5	CBF6	0.801258	-0.000787258
C10	6	CBF6	0.803962	0.000971752
C10	7	CBF6	0.803675	-0.000260795
C10	8	CBF6	0.80545	0.000569038
C10	9	CBF6	0.806614	0.000787984
C10	10	CBF6	0.807514	0.000742761
C10	11	CBF6	0.808196	0.000479624
C10	12	CBF6	0.809367	0.000705841
C10	13	CBF6	0.809841	0.000234803
C10	14	CBF6	0.811702	0.00115047
C10	15	CBF6	0.81198	0.000484045
C10	16	CBF6	0.812345	-9.64864e-05
C10	17	CBF6	0.812431	-0.00095573
C10	18	CBF6	0.814136	-0.000195991
C10	19	CBF6	0.813606	-0.00167029
C10	20	CBF6	0.81587	-0.000351465
C10	21	CBF6	0.815978	-0.00118865
C10	22	CBF6	0.819633	0.00152087
C10	23	CBF6	0.823937	0.00487979
C10	24	CBF6	0.833952	0.0139498
C10	25	CBF6	0.85139	0.0304426
C10	26	CBF6	0.885265	0.063373
C10	27	CBF6	0.945603	0.122766
C10	28	CBF6	1.0501	0.226317
C10	29	CBF6	1.21557	0.390841
C10	30	CBF6	1.44172	0.616052
C10	31	CBF6	1.6921	0.865479
C10	32	CBF6	1.92275	1.09518
C10	33	CBF6	2.12546	1.29696
C10	34	CBF6	2.30976	1.48031
C10	35	CBF6	2.4641	1.6337
C10	36	CBF6	2.58595	1.75461
C10	37	CBF6	2.69209	1.8598
C10	38	CBF6	2.77701	1.94378
C10	39	CBF6	2.85206	2.01788
C10	40	CBF6	2.90929	2.07417
C11	1
C11	2
C11	3
C11	4
C11	5
C11	6
C11	7
C11	8
C11	9
C11	10
C11	11
C11	12
C11	13
C11	14
C11	15
C11	16
C11	17
C11	18
C11	19
C11	20
C11	21
C11	22
C11	23
C11	24
C11	25
C11	26
C11	27
C11	28
C11	29
C11	30
C11	31
C11	32
C11	33
C11	34
C11	35
C11	36
C11	37
C11	38
C11	39
C11	40
C12	1
C12	2
C12	3
C12	4
C12	5
C12	6
C12	7
C12	8
C12	9
C12	10
C12	11
C12	12
C12	13
C12	14
C12	15
C12	16
C12	17
C12	18
C12	19
C12	20
C12	21
C12	22
C12	23
C12	24
C12	25
C12	26
C12	27
C12	28
C12	29
C12	30
C12	31
C12	32
C12	33
C12	34
C12	35
C12	36
C12	37
C12	38
C12	39
C12	40
D1	1
D1	2
D1	3
D1	4
D1	5
D1	6
D1	7
D1	8
D1	9
D1	10
D1	11
D1	12
D1	13
D1	14
D1	15
D1	16
D1	17
D1	18
D1	19
D1	20
D1	21
D1	22
D1	23
D1	24
D1	25
D1	26
D1	27
D1	28
D1	29
D1	30
D1	31
D1	32
D1	33
D1	34
D1	35
D1	36
D1	37
D1	38
D1	39
D1	40
D2	1	CBF5	0.746954	0.00180647
D2	2	CBF5	0.746957	0.00050612
D2	3	CBF5	0.74867	0.000916428
D2	4	CBF5	0.748932	-0.000125412
D2	5	CBF5	0.749898	-0.000463142
D2	6	CBF5	0.752029	0.000364219
D2	7	CBF5	0.753028	5.98076e-05
D2	8	CBF5	0.753749	-0.000521885
D2	9	CBF5	0.756311	0.000736061
D2	10	CBF5	0.757716	0.000837557
D2	11	CBF5	0.757219	-0.000962454
D2	12	CBF5	0.759101	-0.000383644
D2	13	CBF5	0.761567	0.000778636
D2	14	CBF5	0.761597	-0.00049447
D2	15	CBF5	0.762088	-0.00130779
D2	16	CBF5	0.764273	-0.000425946
D2	17	CBF5	0.764661	-0.00134077
D2	18	CBF5	0.767045	-0.000260325
D2	19	CBF5	0.767931	-0.000678463
D2	20	CBF5	0.773184	0.00327159
D2	21	CBF5	0.778517	0.00730109
D2	22	CBF5	0.790886	0.0183663
D2	23	CBF5	0.814811	0.0409883
D2	24	CBF5	0.855378	0.0802512
D2	25	CBF5	0.932568	0.156138
D2	26	CBF5	1.06571	0.287981
D2	27	CBF5	1.27398	0.49494
D2	28	CBF5	1.54511	0.764765
D2	29	CBF5	1.84962	1.06797
D2	30	CBF5	2.11377	1.33083
D2	31	CBF5	2.31543	1.53118
D2	32	CBF5	2.46167	1.67611
D2	33	CBF5	2.57649	1.78963
D2	34	CBF5	2.66727	1.87911
D2	35	CBF5	2.74111	1.95165
D2	36	CBF5	2.79978	2.00901
D2	37	CBF5	2.84394	2.05187
D2	38	CBF5	2.88222	2.08884
D2	39	CBF5	2.9113	2.11663
D2	40	CBF5	2.93887	2.14289
D3	1	CBF5	0.653107	-0.00152758
D3	2	CBF5	0.654276	-0.00210381
D3	3	CBF5	0.65689	-0.00123433
D3	4	CBF5	0.659183	-0.000687014
D3	5	CBF5	0.660913	-0.000702007
D3	6	CBF5	0.663808	0.000447854
D3	7	CBF5	0.666982	0.00187696
D3	8	CBF5	0.666725	-0.00012519
D3	9	CBF5	0.670437	0.00184221
D3	10	CBF5	0.672108	0.00176767
D3	11	CBF5	0.672122	3.67789e-05
D3	12	CBF5	0.673528	-0.000302642
D3	13	CBF5	0.674694	-0.000881078
D3	14	CBF5	0.676573	-0.000747238
D3	15	CBF5	0.677988	-0.00107766
D3	16	CBF5	0.680903	9.20506e-05
D3	17	CBF5	0.681539	-0.00101645
D3	18	CBF5	0.682179	-0.00212227
D3	19	CBF5	0.686498	0.000451847
D3	20	CBF5	0.690172	0.0023805
D3	21	CBF5	0.697405	0.00786916
D3	22	CBF5	0.715482	0.0242008
D3	23	CBF5	0.74521	0.0521838
D3	24	CBF5	0.800071	0.1053
D3	25	CBF5	0.9021	0.205584
D3	26	CBF5	1.07705	0.378788
D3	27	CBF5	1.34681	0.646801
D3	28	CBF5	1.7037	1.00195
D3	29	CBF5	2.08327	1.37977
D3	30	CBF5	2.41686	1.71162
D3	31	CBF5	2.66124	1.95425
D3	32	CBF5	2.8426	2.13387
D3	33	CBF5	2.98376	2.27329
D3	34	CBF5	3.09723	2.38501
D3	35	CBF5	3.18515	2.47119
D3	36	CBF5	3.25408	2.53836
D3	37	CBF5	3.31212	2.59466
D3	38	CBF5	3.35942	2.64022
D3	39	CBF5	3.39922	2.67827
D3	40	CBF5	3.4283	2.70561
D4	1	CBF5	0.628365	-0.00337051
D4	2	CBF5	0.631011	-0.00234247
D4	3	CBF5	0.634603	-0.000369165
D4	4	CBF5	0.634689	-0.00190151
D4	5	CBF5	0.637868	-0.000340903
D4	6	CBF5	0.639138	-0.000689675
D4	7	CBF5	0.642135	0.00068836
D4	8	CBF5	0.643266	0.000201604
D4	9	CBF5	0.6454	0.000716265
D4	10	CBF5	0.648338	0.0020366
D4	11	CBF5	0.648735	0.000814444
D4	12	CBF5	0.651575	0.00203643
D4	13	CBF5	0.651537	0.000380115
D4	14	CBF5	0.652942	0.000165751
D4	15	CBF5	0.654317	-7.75796e-05
D4	16	CBF5	0.654962	-0.00105077
D4	17	CBF5	0.655717	-0.00191423
D4	18	CBF5	0.657212	-0.00203847
D4	19	CBF5	0.659858	-0.00101013
D4	20	CBF5	0.66484	0.00235285
D4	21	CBF5	0.67411	0.010004
D4	22	CBF5	0.691513	0.0257889
D4	23	CBF5	0.724223	0.0568802
D4	24	CBF5	0.786046	0.117085
D4	25	CBF5	0.899525	0.228945
D4	26	CBF5	1.08886	0.416662
D4	27	CBF5	1.37633	0.702518
D4	28	CBF5	1.74312	1.06768
D4	29	CBF5	2.13389	1.45684
D4	30	CBF5	2.46208	1.78341
D4	31	CBF5	2.7148	2.03451
D4	32	CBF5	2.91266	2.23075
D4	33	CBF5	3.05983	2.3763
D4	34	CBF5	3.18772	2.50257
D4	35	CBF5	3.28356	2.5968
D4	36	CBF5	3.35641	2.66803
D4	37	CBF5	3.41815	2.72815
D4	38	CBF5	3.47338	2.78176
D4	39	CBF5	3.52239	2.82916
D4	40	CBF5	3.55463	2.85977
D5	1	CBF5	0.595367	-0.00788526
D5	2	CBF5	0.600265	-0.0043727
D5	3	CBF5	0.604062	-0.00196038
D5	4	CBF5	0.605799	-0.00160908
D5	5	CBF5	0.607897	-0.000895969
D5	6	CBF5	0.610299	0.000121122
D5	7	CBF5	0.612302	0.000739398
D5	8	CBF5	0.613657	0.000708877
D5	9	CBF5	0.614258	-7.49267e-05
D5	10	CBF5	0.616397	0.000679188
D5	11	CBF5	0.619172	0.00206839
D5	12	CBF5	0.620727	0.00223838
D5	13	CBF5	0.620821	0.000947997
D5	14	CBF5	0.622083	0.000824552
D5	15	CBF5	0.622199	-0.000443837
D5	16	CBF5	0.624981	0.000953054
D5	17	CBF5	0.625204	-0.000209418
D5	18	CBF5	0.626301	-0.000497192
D5	19	CBF5	0.627876	-0.000307235
D5	20	CBF5	0.628806	-0.000762319
D5	21	CBF5	0.629175	-0.00177846
D5	22	CBF5	0.631082	-0.00125657
D5	23	CBF5	0.632371	-0.00135301
D5	24	CBF5	0.635055	-5.32739e-05
D5	25	CBF5	0.638414	0.00192071
D5	26	CBF5	0.644598	0.00671948
D5	27	CBF5	0.655979	0.0167152
D5	28	CBF5	0.678064	0.0374156
D5	29	CBF5	0.720342	0.0783086
D5	30	CBF5	0.796046	0.152627
D5	31	CBF5	0.928842	0.284038
D5	32	CBF5	1.14768	0.501488
D5	33	CBF5	1.45104	0.803465
D5	34	CBF5	1.80092	1.15196
D5	35	CBF5	2.13343	1.48309
D5	36	CBF5	2.39895	1.74722
D5	37	CBF5	2.59558	1.94247
D5	38	CBF5	2.73733	2.08283
D5	39	CBF5	2.85732	2.20143
D5	40	CBF5	2.94799	2.29072
D6	1	CBF5	0.585558	-0.00277503
D6	2	CBF5	0.586345	-0.0033779
D6	3	CBF5	0.58883	-0.00228376
D6	4	CBF5	0.590993	-0.00151131
D6	5	CBF5	0.59321	-0.000684445
D6	6	CBF5	0.596114	0.000830083
D6	7	CBF5	0.596618	-5.68008e-05
D6	8	CBF5	0.59774	-0.000324452
D6	9	CBF5	0.600445	0.000990162
D6	10	CBF5	0.601187	0.000342174
D6	11	CBF5	0.603852	0.00161632
D6	12	CBF5	0.60577	0.00214415
D6	13	CBF5	0.605631	0.000615084
D6	14	CBF5	0.608524	0.00211763
D6	15	CBF5	0.607316	-0.0004808
D6	16	CBF5	0.609651	0.000463907
D6	17	CBF5	0.610183	-0.000393651
D6	18	CBF5	0.613308	0.00134106
D6	19	CBF5	0.613816	0.000458464
D6	20	CBF5	0.614169	-0.000579219
D6	21	CBF5	0.613616	-0.00252194
D6	22	CBF5	0.61547	-0.00205824
D6	23	CBF5	0.616911	-0.00200725
D6	24	CBF5	0.619409	-0.000899759
D6	25	CBF5	0.624582	0.00288261
D6	26	CBF5	0.63062	0.00753091
D6	27	CBF5	0.644221	0.0197416
D6	28	CBF5	0.669194	0.0433239
D6	29	CBF5	0.716431	0.0891707
D6	30	CBF5	0.804335	0.175685
D6	31	CBF5	0.956147	0.326106
D6	32	CBF5	1.19669	0.565263
D6	33	CBF5	1.51691	0.884088
D6	34	CBF5	1.87886	1.24465
D6	35	CBF5	2.20158	1.56598
D6	36	CBF5	2.45085	1.81386
D6	37	CBF5	2.64276	2.00438
D6	38	CBF5	2.78149	2.14171
D6	39	CBF5	2.89848	2.25732
D6	40	CBF5	2.98709	2.34453
D7	1	CBF5	0.645526	-0.00819074
D7	2	CBF5	0.651173	-0.00378496
D7	3	CBF5	0.653612	-0.00258806
D7	4	CBF5	0.65444	-0.0030009
D7	5	CBF5	0.657843	-0.000839421
D7	6	CBF5	0.660802	0.000878305
D7	7	CBF5	0.661334	0.000168691
D7	8	CBF5	0.663378	0.000971843
D7	9	CBF5	0.664871	0.00122347
D7	10	CBF5	0.666665	0.00177611
D7	11	CBF5	0.667073	0.000943349
D7	12	CBF5	0.669184	0.00181236
D7	13	CBF5	0.669532	0.000919049
D7	14	CBF5	0.67152	0.00166587
D7	15	CBF5	0.671586	0.000491166
D7	16	CBF5	0.672863	0.000526908
D7	17	CBF5	0.673513	-6.43908e-05
D7	18	CBF5	0.67561	0.000791213
D7	19	CBF5	0.675889	-0.000171661
D7	20	CBF5	0.67542	-0.00188156
D7	21	CBF5	0.675827	-0.00271581
D7	22	CBF5	0.679004	-0.000780524
D7	23	CBF5	0.680239	-0.000785969
D7	24	CBF5	0.680965	-0.00130151
D7	25	CBF5	0.685469	0.00196147
D7	26	CBF5	0.690528	0.00577829
D7	27	CBF5	0.70221	0.016219
D7	28	CBF5	0.722708	0.0354765
D7	29	CBF5	0.763355	0.0748817
D7	30	CBF5	0.837471	0.147757
D7	31	CBF5	0.966583	0.275627
D7	32	CBF5	1.17296	0.480758
D7	33	CBF5	1.45841	0.764969
D7	34	CBF5	1.7944	1.09972
D7	35	CBF5	2.10447	1.40855
D7	36	CBF5	2.34979	1.65263
D7	37	CBF5	2.53271	1.83431
D7	38	CBF5	2.67344	1.97379
D7	39	CBF5	2.78622	2.08533
D7	40	CBF5	2.86823	2.1661
D8	1	CBF6	0.69506	-0.00536218
D8	2	CBF6	0.697728	-0.00350932
D8	3	CBF6	0.69929	-0.00276194
D8	4	CBF6	0.700652	-0.00221537
D8	5	CBF6	0.70382	0.000138167
D8	6	CBF6	0.705396	0.000898952
D8	7	CBF6	0.70514	-0.000172032
D8	8	CBF6	0.706629	0.000502922
D8	9	CBF6	0.708747	0.00180581
D8	10	CBF6	0.708768	0.00101169
D8	11	CBF6	0.710314	0.00174279
D8	12	CBF6	0.712212	0.0028258
D8	13	CBF6	0.710363	0.000161883
D8	14	CBF6	0.711487	0.000471641
D8	15	CBF6	0.711343	-0.000487466
D8	16	CBF6	0.713072	0.000426146
D8	17	CBF6	0.713862	0.000401879
D8	18	CBF6	0.71422	-5.50586e-05
D8	19	CBF6	0.715461	0.000370868
D8	20	CBF6	0.715251	-0.000653982
D8	21	CBF6	0.714072	-0.00264729
D8	22	CBF6	0.715529	-0.00200518
D8	23	CBF6	0.716776	-0.00157365
D8	24	CBF6	0.717227	-0.00193766
D8	25	CBF6	0.718582	-0.00139717
D8	26	CBF6	0.72169	0.000896047
D8	27	CBF6	0.725861	0.0042522
D8	28	CBF6	0.734836	0.0124119
D8	29	CBF6	0.753283	0.0300445
D8	30	CBF6	0.789037	0.0649836
D8	31	CBF6	0.850237	0.125369
D8	32	CBF6	0.958628	0.232945
D8	33	CBF6	1.12812	0.401625
D8	34	CBF6	1.35812	0.630811
D8	35	CBF6	1.60848	0.880356
D8	36	CBF6	1.83669	1.10775
D8	37	CBF6	2.03581	1.30606
D8	38	CBF6	2.19812	1.46754
D8	39	CBF6	2.33454	1.60315
D8	40	CBF6	2.44846	1.71625
D9	1	CBF6	0.677979	-0.00421173
D9	2	CBF6	0.679105	-0.00405581
D9	3	CBF6	0.68225	-0.00188072
D9	4	CBF6	0.683622	-0.00147822
D9	5	CBF6	0.68585	-0.000220034
D9	6	CBF6	0.686503	-0.000536899
D9	7	CBF6	0.688322	0.000311745
D9	8	CBF6	0.689314	0.000334149
D9	9	CBF6	0.691172	0.00122183
D9	10	CBF6	0.691754	0.000834694
D9	11	CBF6	0.693165	0.00127517
D9	12	CBF6	0.694049	0.00118921
D9	13	CBF6	0.694383	0.00055316
D9	14	CBF6	0.695367	0.000567398
D9	15	CBF6	0.696931	0.00116171
D9	16	CBF6	0.697923	0.00118411
D9	17	CBF6	0.698852	0.00114351
D9	18	CBF6	0.699298	0.000619166
D9	19	CBF6	0.699395	-0.000253632
D9	20	CBF6	0.698831	-0.00178756
D9	21	CBF6	0.699682	-0.00190636
D9	22	CBF6	0.700733	-0.00182513
D9	23	CBF6	0.70157	-0.00195788
D9	24	CBF6	0.701973	-0.00252484
D9	25	CBF6	0.705113	-0.000354944
D9	26	CBF6	0.706811	0.000372762
D9	27	CBF6	0.711366	0.00395762
D9	28	CBF6	0.719114	0.0107357
D9	29	CBF6	0.736585	0.0272372
D9	30	CBF6	0.76869	0.0583728
D9	31	CBF6	0.82752	0.116233
D9	32	CBF6	0.9248	0.212543
D9	33	CBF6	1.07787	0.364641
D9	34	CBF6	1.28105	0.566853
D9	35	CBF6	1.50676	0.791593
D9	36	CBF6	1.71639	1.00025
D9	37	CBF6	1.89486	1.17775
D9	38	CBF6	2.05329	1.33521
D9	39	CBF6	2.185	1.46595
D9	40	CBF6	2.2952	1.57518
D10	1	CBF6	0.777136	0.000274467
D10	2	CBF6	0.774	-0.00359647
D10	3	CBF6	0.77613	-0.00220139
D10	4	CBF6	0.777125	-0.00194047
D10	5	CBF6	0.778022	-0.00177831
D10	6	CBF6	0.779702	-0.000833132
D10	7	CBF6	0.780447	-0.000823445
D10	8	CBF6	0.783401	0.00139537
D10	9	CBF6	0.783017	0.00027668
D10	10	CBF6	0.785222	0.00174674
D10	11	CBF6	0.784994	0.000783678
D10	12	CBF6	0.786622	0.00167742
D10	13	CBF6	0.786952	0.0012722
D10	14	CBF6	0.78864	0.00222549
D10	15	CBF6	0.788378	0.00122797
D10	16	CBF6	0.788267	0.000382335
D10	17	CBF6	0.790558	0.00193864
D10	18	CBF6	0.791268	0.00191364
D10	19	CBF6	0.791259	0.00117022
D10	20	CBF6	0.789074	-0.00175014
D10	21	CBF6	0.790313	-0.00124585
D10	22	CBF6	0.792261	-3.34023e-05
D10	23	CBF6	0.791204	-0.00182449
D10	24	CBF6	0.790217	-0.00354644
D10	25	CBF6	0.793983	-0.000515452
D10	26	CBF6	0.794105	-0.00112851
D10	27	CBF6	0.797579	0.00161065
D10	28	CBF6	0.802779	0.00607608
D10	29	CBF6	0.814824	0.0173859
D10	30	CBF6	0.83792	0.0397469
D10	31	CBF6	0.877978	0.0790698
D10	32	CBF6	0.950087	0.150444
D10	33	CBF6	1.06715	0.266769
D10	34	CBF6	1.23331	0.432195
D10	35	CBF6	1.44215	0.640302
D10	36	CBF6	1.63831	0.835732
D10	37	CBF6	1.82555	1.02223
D10	38	CBF6	1.97983	1.17578
D10	39	CBF6	2.11501	1.31022
D10	40	CBF6	2.2285	1.42298
D11	1
D11	2
D11	3
D11	4
D11	5
D11	6
D11	7
D11	8
D11	9
D11	10
D11	11
D11	12
D11	13
D11	14
D11	15
D11	16
D11	17
D11	18
D11	19
D11	20
D11	21
D11	22
D11	23
D11	24
D11	25
D11	26
D11	27
D11	28
D11	29
D11	30
D11	31
D11	32
D11	33
D11	34
D11	35
D11	36
D11	37
D11	38
D11	39
D11	40
D12	1
D12	2
D12	3
D12	4
D12	5
D12	6
D12	7
D12	8
D12	9
D12	10
D12	11
D12	12
D12	13
D12	14
D12	15
D12	16
D12	17
D12	18
D12	19
D12	20
D12	21
D12	22
D12	23
D12	24
D12	25
D12	26
D12	27
D12	28
D12	29
D12	30
D12	31
D12	32
D12	33
D12	34
D12	35
D12	36
D12	37
D12	38
D12	39
D12	40
E1	1
E1	2
E1	3
E1	4
E1	5
E1	6
E1	7
E1	8
E1	9
E1	10
E1	11
E1	12
E1	13
E1	14
E1	15
E1	16
E1	17
E1	18
E1	19
E1	20
E1	21
E1	22
E1	23
E1	24
E1	25
E1	26
E1	27
E1	28
E1	29
E1	30
E1	31
E1	32
E1	33
E1	34
E1	35
E1	36
E1	37
E1	38
E1	39
E1	40
E2	1	CBF5	0.780578	-0.00167172
E2	2	CBF5	0.782995	-0.000958558
E2	3	CBF5	0.783971	-0.00168699
E2	4	CBF5	0.786771	-0.000591408
E2	5	CBF5	0.788849	-0.000217932
E2	6	CBF5	0.789729	-0.00104287
E2	7	CBF5	0.793604	0.00112751
E2	8	CBF5	0.794975	0.000794253
E2	9	CBF5	0.796985	0.0011002
E2	10	CBF5	0.798317	0.000727005
E2	11	CBF5	0.80154	0.00224644
E2	12	CBF5	0.801177	0.000178688
E2	13	CBF5	0.802859	0.000156091
E2	14	CBF5	0.804729	0.000321844
E2	15	CBF5	0.805281	-0.000830678
E2	16	CBF5	0.80742	-0.000396108
E2	17	CBF5	0.807971	-0.0015497
E2	18	CBF5	0.809727	-0.00149821
E2	19	CBF5	0.814092	0.00116188
E2	20	CBF5	0.818081	0.00344693
E2	21	CBF5	0.829217	0.0128785
E2	22	CBF5	0.847205	0.0291615
E2	23	CBF5	0.884098	0.0643504
E2	24	CBF5	0.947513	0.126061
E2	25	CBF5	1.06208	0.238923
E2	26	CBF5	1.25303	0.428168
E2	27	CBF5	1.52844	0.701877
E2	28	CBF5	1.85027	1.022
E2	29	CBF5	2.16766	1.33768
E2	30	CBF5	2.41546	1.58378
E2	31	CBF5	2.60185	1.76847
E2	32	CBF5	2.73865	1.90356
E2	33	CBF5	2.84491	2.00812
[truncated: 1,847 more rows]

## Sheet: BioGroup Analysis Result
Block Type	96alum
Chemistry	SYBR_GREEN
Experiment File Name	D:\HAIFENG\CBF56Untitled.eds
Experiment Run End Time	2013-01-10 07:57:55 AM CST
Instrument Type	sds7500
Passive Reference	ROX
Biogroup Name	Target Name	Task	RQ	RQ Min	RQ Max	Cт Mean	ΔCт Mean	ΔCт SE	ΔΔCт
Analysis Type	Singleplex
Endogenous Control	CBF5
RQ Min/Max Confidence Level	95.0
Reference Biogroup Name

## Sheet: Technical Analysis Result
Block Type	96alum
Chemistry	SYBR_GREEN
Experiment File Name	D:\HAIFENG\CBF56Untitled.eds
Experiment Run End Time	2013-01-10 07:57:55 AM CST
Instrument Type	sds7500
Passive Reference	ROX
Sample Name	Target Name	Task	RQ	RQ Min	RQ Max	Cт Mean	ΔCт Mean	ΔCт SE	ΔΔCт
6-2	CBF6	UNKNOWN				26.3076	5.12299	0.180205
12-1	CBF6	UNKNOWN				28.1554	5.21133	0.137285
6-3	CBF6	UNKNOWN				27.4145	4.73252	0.103619
12-2	CBF6	UNKNOWN				31.8379	4.79634	0.327841
3-1	CBF6	UNKNOWN
12-3	CBF6	UNKNOWN				35.6378	5.51955	0.721913
3-2	CBF6	UNKNOWN				35.5282	2.73761	1.16666
24-1	CBF6	UNKNOWN				32.4382	5.87289	0.356164
3-3	CBF6	UNKNOWN				35.0943	5.1895	0.951717
24-2	CBF6	UNKNOWN				27.6426	4.57936	0.172617
6-1	CBF6	UNKNOWN				27.2145	5.4311	0.122421
24-3	CBF6	UNKNOWN				31.4599	4.34605	0.175939
Analysis Type	Singleplex
Endogenous Control	CBF5
RQ Min/Max Confidence Level	95.0
Reference Sample	3-1
