# Supplementary material for: Genome-wide identification of CBF genes and their responses to cold acclimation in Taraxacum kok-saghyz
Source: PeerJ journal article supplement (doi:10.7717/peerj.13429), 2022-05-12
Supplement: Raw_data.zip [file CBF6-CBF7.xls]

## Sheet: Results
Block Type	96alum
Chemistry	SYBR_GREEN
Experiment File Name	D:\HAIFENG\Untitled.eds
Experiment Run End Time	2021-08-29 11:47:26 AM CST
Instrument Type	sds7500
Passive Reference	ROX
Well	Sample Name	Target Name	Task	Reporter	Quencher	RQ	RQ Min	RQ Max	Cт	Cт Mean	Cт SD	ΔCт	ΔCт Mean	ΔCт SE	HK Control ΔCт Mean	HK Control ΔCт SE		ΔΔCт	Automatic Ct Threshold	Ct Threshold	Automatic Baseline	Baseline Start	Baseline End	Efficiency	Tm1	Tm2	Tm3	Comments	HIGHSD	NOAMP	EXPFAIL
A1	3-1	CBF6	UNKNOWN	SYBR	None				29.1947	28.9615	0.202483								TRUE	0.100995	TRUE	3	25	1	80.7254				N	N	N
A2	3-1	CBF6	UNKNOWN	SYBR	None				28.8305	28.9615	0.202483								TRUE	0.100995	TRUE	3	25	1	80.9011				N	N	N
A3	3-1	CBF6	UNKNOWN	SYBR	None				28.8592	28.9615	0.202483								TRUE	0.100995	TRUE	3	25	1	80.9011				N	N	N
A7	3-1	CBF7	UNKNOWN	SYBR	None				30.5579	30.5983	0.68479								TRUE	0.0153026	TRUE	3	29	1	84.59				Y	N	N
A8	3-1	CBF7	UNKNOWN	SYBR	None				30.5597	30.5983	0.68479								TRUE	0.0153026	TRUE	3	30	1	84.7656				Y	N	N
A9	3-1	CBF7	UNKNOWN	SYBR	None				30.6772	30.5983	0.68479								TRUE	0.0153026	TRUE	3	29	1	84.7656				Y	N	N
B1	3-2	CBF6	UNKNOWN	SYBR	None				27.8812	28.1917	0.284951								TRUE	0.100995	TRUE	3	24	1	80.9011				N	N	N
B2	3-2	CBF6	UNKNOWN	SYBR	None				28.2527	28.1917	0.284951								TRUE	0.100995	TRUE	3	24	1	80.9011				N	N	N
B3	3-2	CBF6	UNKNOWN	SYBR	None				28.4413	28.1917	0.284951								TRUE	0.100995	TRUE	3	24	1	81.0767				N	N	N
B4	12-1	CBF6	UNKNOWN	SYBR	None				29.7236	29.7362	0.735086								TRUE	0.100995	TRUE	3	32	1	81.2524				Y	N	N
B5	12-1	CBF6	UNKNOWN	SYBR	None				29.7636	29.7362	0.735086								TRUE	0.100995	TRUE	3	31	1	81.0767				Y	N	N
B6	12-1	CBF6	UNKNOWN	SYBR	None				29.7214	29.7362	0.735086								TRUE	0.100995	TRUE	3	32	1	81.0767				Y	N	N
B7	3-2	CBF7	UNKNOWN	SYBR	None				30.3337	30.9484	1.22823								TRUE	0.0153026	TRUE	3	29	1	84.9413				Y	N	N
B8	3-2	CBF7	UNKNOWN	SYBR	None				32.3627	30.9484	1.22823								TRUE	0.0153026	TRUE	3	31	1	84.7656				Y	N	N
B9	3-2	CBF7	UNKNOWN	SYBR	None				30.149	30.9484	1.22823								TRUE	0.0153026	TRUE	3	28	1	84.9413				Y	N	N
B10	12-1	CBF7	UNKNOWN	SYBR	None				28.2226	28.2591	0.0271304								TRUE	0.0153026	TRUE	3	39	1	64.3889				N	Y	Y
B11	12-1	CBF7	UNKNOWN	SYBR	None				28.232	28.2591	0.0271304								TRUE	0.0153026	TRUE	3	39	1	65.2672				N	Y	Y
B12	12-1	CBF7	UNKNOWN	SYBR	None				28.3227	28.2591	0.0271304								TRUE	0.0153026	TRUE	3	39	1	64.5646				N	Y	Y
C1	3-3	CBF6	UNKNOWN	SYBR	None				29.2053	28.9833	0.285185								TRUE	0.100995	TRUE	3	25	1	80.9011				N	N	N
C2	3-3	CBF6	UNKNOWN	SYBR	None				28.6617	28.9833	0.285185								TRUE	0.100995	TRUE	3	24	1	81.2524				N	N	N
C3	3-3	CBF6	UNKNOWN	SYBR	None				29.0829	28.9833	0.285185								TRUE	0.100995	TRUE	3	25	1	81.2524				N	N	N
C4	12-2	CBF6	UNKNOWN	SYBR	None				30.0204	29.6423	0.471496								TRUE	0.100995	TRUE	3	31	1	81.2524				N	N	N
C5	12-2	CBF6	UNKNOWN	SYBR	None				29.114	29.6423	0.471496								TRUE	0.100995	TRUE	3	30	1	81.2524				N	N	N
C6	12-2	CBF6	UNKNOWN	SYBR	None				29.7925	29.6423	0.471496								TRUE	0.100995	TRUE	3	31	1	81.2524				N	N	N
C7	3-3	CBF7	UNKNOWN	SYBR	None				29.8059	29.9977	0.194327								TRUE	0.0153026	TRUE	3	28	1	85.1169				N	N	N
C8	3-3	CBF7	UNKNOWN	SYBR	None				29.9928	29.9977	0.194327								TRUE	0.0153026	TRUE	3	28	1	85.1169				N	N	N
C9	3-3	CBF7	UNKNOWN	SYBR	None				30.1944	29.9977	0.194327								TRUE	0.0153026	TRUE	3	28	1	84.7656				N	N	N
C10	12-2	CBF7	UNKNOWN	SYBR	None				28.5067	28.4695	0.050332								TRUE	0.0153026	TRUE	3	39	1	64.7402				N	Y	Y
C11	12-2	CBF7	UNKNOWN	SYBR	None				28.4191	28.4695	0.050332								TRUE	0.0153026	TRUE	3	39	1	67.0238				N	Y	Y
C12	12-2	CBF7	UNKNOWN	SYBR	None				28.4825	28.4695	0.050332								TRUE	0.0153026	TRUE	3	31	1	84.4143				N	N	N
D1	6-1	CBF6	UNKNOWN	SYBR	None				29.0046	28.8898	0.272941								TRUE	0.100995	TRUE	3	27	1	81.2524				N	N	N
D2	6-1	CBF6	UNKNOWN	SYBR	None				28.5782	28.8898	0.272941								TRUE	0.100995	TRUE	3	27	1	81.428				N	N	N
D3	6-1	CBF6	UNKNOWN	SYBR	None				29.0866	28.8898	0.272941								TRUE	0.100995	TRUE	3	27	1	81.428				N	N	N
D4	12-3	CBF6	UNKNOWN	SYBR	None				29.4668	29.4216	0.111363								TRUE	0.100995	TRUE	3	27	1	81.2524				N	N	N
D5	12-3	CBF6	UNKNOWN	SYBR	None				29.5033	29.4216	0.111363								TRUE	0.100995	TRUE	3	28	1	81.428				N	N	N
D6	12-3	CBF6	UNKNOWN	SYBR	None				29.2948	29.4216	0.111363								TRUE	0.100995	TRUE	3	28	1	81.428				N	N	N
D7	6-1	CBF7	UNKNOWN	SYBR	None				28.4168	28.3353	0.379009								TRUE	0.0153026	TRUE	3	31	1	85.1169				N	N	N
D8	6-1	CBF7	UNKNOWN	SYBR	None				28.3428	28.3353	0.379009								TRUE	0.0153026	TRUE	3	31	1	85.1169				N	N	N
D9	6-1	CBF7	UNKNOWN	SYBR	None				28.2463	28.3353	0.379009								TRUE	0.0153026	TRUE	3	39	1	67.3751				N	Y	Y
E1	6-2	CBF6	UNKNOWN	SYBR	None				28.6635	28.7483	0.208303								TRUE	0.100995	TRUE	3	25	1	81.2524				N	N	N
E2	6-2	CBF6	UNKNOWN	SYBR	None				28.5958	28.7483	0.208303								TRUE	0.100995	TRUE	3	24	1	81.2524				N	N	N
E3	6-2	CBF6	UNKNOWN	SYBR	None				28.9857	28.7483	0.208303								TRUE	0.100995	TRUE	3	25	1	81.428				N	N	N
E4	24-1	CBF6	UNKNOWN	SYBR	None				27.2561	27.5262	0.395352								TRUE	0.100995	TRUE	3	26	1	81.428				N	N	N
E5	24-1	CBF6	UNKNOWN	SYBR	None				27.3426	27.5262	0.395352								TRUE	0.100995	TRUE	3	26	1	81.428				N	N	N
E6	24-1	CBF6	UNKNOWN	SYBR	None				27.98	27.5262	0.395352								TRUE	0.100995	TRUE	3	27	1	81.6037				N	N	N
E7	6-2	CBF7	UNKNOWN	SYBR	None				28.4524	28.425	0.0766451								TRUE	0.0153026	TRUE	3	39	1	64.9159				N	Y	Y
E8	6-2	CBF7	UNKNOWN	SYBR	None				28.475	28.425	0.0766451								TRUE	0.0153026	TRUE	3	30	1	84.59				N	N	N
E9	6-2	CBF7	UNKNOWN	SYBR	None				28.3484	28.425	0.0766451								TRUE	0.0153026	TRUE	3	39	1	65.2672				N	Y	Y
E10	24-1	CBF7	UNKNOWN	SYBR	None				28.0009	28.0009	0.0766451								TRUE	0.0153026	TRUE	3	39	1	64.9159				N	Y	Y
E11	24-1	CBF7	UNKNOWN	SYBR	None				28.0009	28.0009	0.0766451								TRUE	0.0153026	TRUE	3	39	1	66.1455				N	Y	Y
E12	24-1	CBF7	UNKNOWN	SYBR	None				28.001	28.0009	0.0766451								TRUE	0.0153026	TRUE	3	39	1	64.9159				N	Y	Y
F1	6-3	CBF6	UNKNOWN	SYBR	None				29.2057	29.063	0.133509								TRUE	0.100995	TRUE	3	25	1	81.0767				N	N	N
F2	6-3	CBF6	UNKNOWN	SYBR	None				28.9412	29.063	0.133509								TRUE	0.100995	TRUE	3	25	1	81.2524				N	N	N
F3	6-3	CBF6	UNKNOWN	SYBR	None				29.042	29.063	0.133509								TRUE	0.100995	TRUE	3	25	1	81.2524				N	N	N
F4	24-2	CBF6	UNKNOWN	SYBR	None				27.3543	27.123	0.25839								TRUE	0.100995	TRUE	3	25	1	81.2524				N	N	N
F5	24-2	CBF6	UNKNOWN	SYBR	None				26.8441	27.123	0.25839								TRUE	0.100995	TRUE	3	25	1	81.428				N	N	N
F6	24-2	CBF6	UNKNOWN	SYBR	None				27.1707	27.123	0.25839								TRUE	0.100995	TRUE	3	25	1	81.428				N	N	N
F7	6-3	CBF7	UNKNOWN	SYBR	None				28.8194	28.3845	0.249919								TRUE	0.0153026	TRUE	3	29	1	84.2386				N	N	N
F8	6-3	CBF7	UNKNOWN	SYBR	None				28.1414	28.3845	0.249919								TRUE	0.0153026	TRUE	3	39	1	65.4429				N	Y	Y
F9	6-3	CBF7	UNKNOWN	SYBR	None				28.1928	28.3845	0.249919								TRUE	0.0153026	TRUE	3	29	1	84.063				N	N	N
F10	24-2	CBF7	UNKNOWN	SYBR	None				27.2277	27.309	0.0812909								TRUE	0.0153026	TRUE	3	39	1	62.1053				N	Y	Y
F11	24-2	CBF7	UNKNOWN	SYBR	None				27.38	27.309	0.0812909								TRUE	0.0153026	TRUE	3	39	1	65.6185				N	Y	Y
F12	24-2	CBF7	UNKNOWN	SYBR	None				27.3193	27.309	0.0812909								TRUE	0.0153026	TRUE	3	39	1	65.7942				N	Y	Y
G4	24-3	CBF6	UNKNOWN	SYBR	None				27.3692	27.3141	0.106184								TRUE	0.100995	TRUE	3	26	1	81.0767				N	N	N
G5	24-3	CBF6	UNKNOWN	SYBR	None				27.3815	27.3141	0.106184								TRUE	0.100995	TRUE	3	26	1	81.2524				N	N	N
G6	24-3	CBF6	UNKNOWN	SYBR	None				27.1917	27.3141	0.106184								TRUE	0.100995	TRUE	3	26	1	81.2524				N	N	N
G10	24-3	CBF7	UNKNOWN	SYBR	None				27.4543	27.4543	0.499639								TRUE	0.0153026	TRUE	3	39	1	64.3889				N	Y	Y
G11	24-3	CBF7	UNKNOWN	SYBR	None				27.101	27.4543	0.499639								TRUE	0.0153026	TRUE	3	35	1	74.5773				N	N	N
G12	24-3	CBF7	UNKNOWN	SYBR	None				27.8076	27.4543	0.499639								TRUE	0.0153026	TRUE	3	35	1	79.8471				N	N	N
Analysis Type	Singleplex
Endogenous Control	CBF6
RQ Min/Max Confidence Level	95.0
Reference Sample	3-1

## Sheet: Raw Data
Block Type	96alum
Chemistry	SYBR_GREEN
Experiment File Name	D:\HAIFENG\Untitled.eds
Experiment Run End Time	2021-08-29 11:47:26 AM CST
Instrument Type	sds7500
Passive Reference	ROX
Well	Cycle	1	2	3	4	5
A1	1	243831	61574.3	41596.9	400754	996.622
A2	1	259721	59201.2	45479.9	390922	1580.9
A3	1	304185	66418.7	53111.7	431014	2119.64
A4	1	309376	64033.9	52222.2	392772	1787.11
A5	1	325515	65482.2	54553	390564	1979.01
A6	1	290924	55038	50119.4	355981	1926.56
A7	1	267423	57727.3	55946.6	408182	1976.31
A8	1	313489	65011.1	62656.9	452671	2645.95
A9	1	348240	72041	68488.5	506321	2866.79
A10	1	289680	62850.3	62811.7	498544	2999.19
A11	1	229390	52408.2	48787.6	427675	0
A12	1	447312	97324.6	70425.2	589806	3964.53
B1	1	242260	59858.9	42985.2	374602	1489.34
B2	1	272119	61583.3	50047.5	402419	2372.42
B3	1	292235	63715.9	54284.8	403864	1889
B4	1	311347	69976.2	63805.4	460544	8122.61
B5	1	295566	63806.6	61632.9	428225	2848.05
B6	1	277827	57827	62065.8	425363	2702.3
B7	1	249382	54836.3	57354.9	392926	2466.67
B8	1	298904	64134	65871.1	448429	2629.21
B9	1	306071	64120.1	63607.4	443369	2634.11
B10	1	255755	55925.3	62129.7	468718	2815.04
B11	1	219100	50481.7	50738.5	404209	1921.35
B12	1	425761	94562.8	74438.1	598723	3667.68
C1	1	288539	71532.8	55369.2	454286	2850.65
C2	1	297378	69771.4	56898	435054	2426.19
C3	1	326270	73725.8	65010.9	460072	2860.85
C4	1	293589	60474.7	66430.8	463533	3047.47
C5	1	287560	61269.6	68987.5	465669	2776.5
C6	1	306798	66956.4	75414.8	498097	2981.36
C7	1	261621	52949	68122.5	453129	2510.21
C8	1	322108	67866.6	74699.6	483659	2662.26
C9	1	308419	66487.1	72173.7	485866	2512.67
C10	1	240410	51214.3	59900.6	431873	1984.79
C11	1	217172	49033.8	51839.4	397653	2061.88
C12	1	426344	90675.6	76914.4	596602	3397.32
D1	1	364014	94347.8	69223.8	551684	2766.78
D2	1	336893	78533.4	64115.3	464088	1958.49
D3	1	366329	84157.5	73223.7	490864	2919.88
D4	1	339348	73271.4	72983.8	473347	2842.51
D5	1	346329	81556.3	86582.8	506708	3654.2
D6	1	348138	76458.5	82615.1	506324	2650.35
D7	1	302022	69318.6	81388.3	503267	2686.84
D8	1	332293	74764.6	81365.2	504584	2683.56
D9	1	335114	74124.4	80233	511512	2929.16
D10	1	267327	60389	71005.3	496220	1728.34
D11	1	217820	50904.6	56125.4	425373	559.524
D12	1	441614	96065.4	85999.7	661399	3614.8
E1	1	346036	84477.6	64472.7	504896	2678.99
E2	1	371389	88090.5	69400.1	492062	2576.72
E3	1	401893	88909.9	78325.8	504116	2885.37
E4	1	441050	100105	105702	668565	3386.29
E5	1	364146	81845.2	94555.8	590446	3080.77
E6	1	397309	91256.1	103561	624666	3315.9
E7	1	312103	73978.5	84831.5	511983	2858.46
E8	1	398537	92101.8	97739.5	584851	3554.62
E9	1	386724	90846.9	90866.6	566263	3199.53
E10	1	289912	67765.9	71143.2	478574	2073.1
E11	1	228128	53246.8	55767.1	408363	1325.08
E12	1	468162	102359	87255.3	648859	3719.2
F1	1	346718	91721	71070.8	542558	2188.94
F2	1	390938	96794	75933	542544	2215.4
F3	1	448214	105516	95638.9	618156	2996.45
F4	1	398849	85746.9	88644.6	558760	3273.79
F5	1	430084	90265.6	96065.1	590857	3100.69
F6	1	420572	94285	96566.3	577726	2880.72
F7	1	344310	80677.1	92472.5	562572	2787.62
F8	1	462704	114473	108654	646816	4058.24
F9	1	434479	98959.9	103963	655457	3313.12
F10	1	329843	74115.2	80356.7	553080	2173.31
F11	1	251101	58778.3	61959.5	456706	203.282
F12	1	453420	97444.4	88465.7	680950	4025.78
G1	1	334040	86194.6	65233.8	524648	2740.75
G2	1	409261	101536	79569.5	584815	2842.7
G3	1	504080	117277	106754	730281	3372.75
G4	1	449329	95683.8	97669.3	635016	3521.06
G5	1	404524	83237.5	91618.9	581662	3574
G6	1	423064	87039.5	93347.3	569659	3890.49
G7	1	358646	79452.2	88274.4	543300	3217.91
G8	1	429272	89901.1	98227.5	606174	3889.83
G9	1	440796	99505.1	98133.8	622976	3973.76
G10	1	327563	85279.2	74975.6	517552	1374.91
G11	1	266400	62638.4	62079.9	460340	2034.34
G12	1	500030	108442	94255.2	734967	3905.14
H1	1	377026	94529.9	65813.1	533186	2587.44
H2	1	391745	95101.8	69720.4	529324	2136.2
H3	1	469558	103505	87694.6	609122	3929.21
H4	1	440596	37157.5	20253.3	16154.6	4393.65
H5	1	442018	37114.9	20419.9	16373.8	4193.72
H6	1	406055	35676.4	19980.8	15699.5	3868.28
H7	1	378881	82729.6	94527.3	632266	3332.39
H8	1	434932	92408.7	102977	683166	4252.42
H9	1	453699	102846	101639	694262	3957.12
H10	1	334786	26055.6	13251	10850.5	3253.8
H11	1	296893	23648.4	11720	9848.79	2812.98
H12	1	580035	45374.1	21694.2	17223.2	3835.12
A1	2	241448	61139.3	41923.1	399989	1306.97
A2	2	259449	59267.7	45420.9	389544	1390.85
A3	2	304590	66728.7	53092.4	430193	1944.07
A4	2	309499	63865.2	52277.9	392548	2131.35
A5	2	326789	65836.7	54639.6	389702	2194.49
A6	2	291270	55351.1	50155.2	355883	2030.92
A7	2	268445	58034.3	56002.9	406798	2150.05
A8	2	314094	65326.8	62657.7	451517	2865.96
A9	2	348944	72388.4	68556.4	505045	3102
A10	2	290184	63528.2	62813.7	497211	2729.47
A11	2	228065	52492.9	48557.9	425022	0
A12	2	447469	98117.4	70819.8	591577	4059.88
B1	2	241432	60033.7	42606.1	373796	1635.88
B2	2	272766	61465.3	49963.8	402842	2201.77
B3	2	293418	64230.4	54391.5	405055	1958.63
B4	2	311863	70065.4	64135	461237	8947.89
B5	2	297040	64471	61801.8	428972	2798.34
B6	2	279519	58184.6	62293.2	426226	2912.15
B7	2	251768	55471.7	57476.9	393513	2433.79
B8	2	300656	64489.1	66050.1	447898	2715.13
B9	2	307735	64343.2	63807.2	443392	2704.75
B10	2	256617	56315.5	62261.9	467972	2686.64
B11	2	218143	50743.5	50673.1	402442	1805.37
B12	2	426472	95440.7	74505.4	597548	3562.44
C1	2	287614	71013.1	55472.7	453760	2357.72
C2	2	298411	70167	57227.6	435731	2101.94
C3	2	327503	74515	65215.4	462245	2448.81
C4	2	294860	60764.4	66546.4	465638	2899.98
C5	2	289825	61857.8	69308.5	466839	3076.35
C6	2	308865	67496.7	75781.6	499745	2571.86
C7	2	262551	52597.6	68300	454337	2530.72
C8	2	323969	68216.5	75023.2	483571	2855.25
C9	2	311180	67133.2	72408.2	486260	2125.03
C10	2	241138	51334.6	60133.8	431642	2411.65
C11	2	217690	49000.6	51932	397719	2114.99
C12	2	425421	90960.3	76812.6	595651	3356.68
D1	2	363344	94510.7	69550.9	551187	2558.5
D2	2	336557	78684.8	64305.2	464636	2079.26
D3	2	368153	84969.2	73641.8	492544	2753.03
D4	2	341087	73922.8	73496.7	474830	2809.94
D5	2	348208	82158.8	86872.7	507104	3710.7
D6	2	350056	76937.8	83182.8	507031	2833.63
D7	2	305291	70018.5	81743.8	504044	2965.84
D8	2	334442	75734.9	81624.7	504619	2717.02
D9	2	337860	74775.4	80748.5	512493	3107.91
D10	2	268934	60718.2	71360.2	497046	2020.95
D11	2	218124	50775.1	56180.5	425265	704.943
D12	2	442731	96402.5	86124.4	661675	3799.64
E1	2	346947	84807	64791.9	506476	2329.08
E2	2	373332	88560.7	69973.8	493961	2277.26
E3	2	404752	89415.2	78733.5	505152	3079.18
E4	2	443253	100593	106167	670921	3215.74
E5	2	367373	82901.6	95149.4	592154	2820.39
E6	2	399752	92094.5	103920	625651	3267.06
E7	2	314860	74735.2	84977	512309	2328.54
E8	2	402642	93308.4	97993.7	585364	3476.28
E9	2	388726	91543	91256.7	566347	3185.75
E10	2	291124	68140.2	71331.3	478685	2164.64
E11	2	229223	53681.9	56070.5	408601	1418.38
E12	2	465898	102212	87372.9	647964	3480.41
F1	2	346182	91959.8	70978.5	542574	2540.41
F2	2	392611	96942.3	76463.5	543877	2338.28
F3	2	450073	105853	96205	619821	3038.17
F4	2	399978	85986.5	89012.5	559674	3254.25
F5	2	432945	91164.5	96333.9	591467	2887.4
F6	2	421823	94431.9	96758.7	577840	2756.74
F7	2	346184	82015.4	92629.2	563068	2756.06
F8	2	466471	115076	109300	649200	4105.81
F9	2	438064	100143	104489	655976	3795.21
F10	2	331836	74899.3	80663	553926	2293.75
F11	2	252028	58837.4	61976.1	455996	322.8
F12	2	454006	97467.3	88617.7	681682	3757.62
G1	2	332802	86023.4	65534.4	524802	2350.93
G2	2	411557	102690	80348	587076	2657.44
G3	2	504942	117258	107220	732444	3547.01
G4	2	451154	95906.5	98158.9	637938	3602.99
G5	2	405991	84001.8	91948.7	582612	3425.28
G6	2	425348	87468.1	93577.4	570465	3534.03
G7	2	360852	80411.3	88496.7	543776	3360.83
G8	2	432210	90443.1	98601.1	607033	4269.78
G9	2	444105	99803.5	98221.7	623988	4018.4
G10	2	330296	87123.3	75176.5	516795	1348.72
G11	2	268240	63050.2	62459.3	460271	1820.39
G12	2	499591	107977	94278.7	735001	4084.04
H1	2	377856	95551	66000.9	533333	2553.46
H2	2	392683	95901.7	70225.7	530550	2489.94
H3	2	468973	103660	87522.8	608110	3670.2
H4	2	437946	37313.5	20280.4	16313.1	4595.89
H5	2	440452	36875.5	20381.9	16292.3	4326.22
H6	2	404617	35533.3	19903.6	15677.1	4168.59
H7	2	380318	83430	94689.8	630525	3217.38
H8	2	436933	92856.6	102748	682510	4446.3
H9	2	456233	103658	101621	693200	4110.23
H10	2	334077	26242.7	13469.5	10924.4	3190.83
H11	2	295528	23939.8	11498.9	9368.85	2615
H12	2	576951	44903	21644	17344.3	4864.32
A1	3	239412	61083.5	41610.4	396830	1187.5
A2	3	259740	59330.8	45541.2	388952	1905.79
A3	3	304696	66677.9	53310.6	429986	1946.03
A4	3	309830	64062.4	52435.3	392106	2123.55
A5	3	327284	65712.6	54742.5	389137	2091.61
A6	3	291956	55264.1	50421.3	355827	1788.49
A7	3	269038	58224.2	55932.1	405891	2102.59
A8	3	315509	65510.6	62703.3	450323	2899.17
A9	3	349781	72368.5	68499	505359	2664.36
A10	3	290327	63456.4	62825.7	495971	3009.26
A11	3	227136	52587.2	48376.1	422671	0
A12	3	448220	98057.1	70808.4	590670	4123.44
B1	3	239389	59434.2	42496.1	370408	1980.91
B2	3	272608	62119.7	50106	403316	1950.24
B3	3	294134	64484.6	54948.7	406033	1962.56
B4	3	312569	70106.1	64444.8	462603	9307.49
B5	3	298561	64759.1	62066.1	428764	3040.17
B6	3	280071	58518.3	62524.6	426598	2496.48
B7	3	253258	55898.5	57565.1	393675	2587.48
B8	3	301596	64984.5	66038.3	447413	2680.12
B9	3	308265	64471.8	63791.6	443176	2687.5
B10	3	255256	56337	62040.4	465703	2850.96
B11	3	218491	50727.8	50700.7	401373	1714.02
B12	3	425691	95216.5	74355.1	595601	3493.03
C1	3	285188	70673.5	55229.1	450178	2987.1
C2	3	298594	70115.8	57360.9	436061	2498.71
C3	3	329537	75005.5	65557	463498	2437.57
C4	3	295839	60773.8	66770	466441	2783.75
C5	3	291303	62233.1	69557	467652	2746.07
C6	3	310521	68099.1	76117.1	500306	2707.55
C7	3	263832	52779	68546.7	455408	2482.31
C8	3	325059	68456.8	75135.8	484150	2752.15
C9	3	312563	67326.9	72712.7	486837	2298.6
C10	3	242119	51527.8	60069.2	432457	1975.22
C11	3	218118	49275.6	51916.9	397445	2024.1
C12	3	425174	90938.3	76801.6	592963	3275.4
D1	3	362185	94708.1	69110.4	548228	2870.31
D2	3	338074	79025.5	64509.2	464909	2290.61
D3	3	368978	85410.2	74006.7	494517	2772.36
D4	3	342539	73946.4	73827.6	476200	3170.19
D5	3	349363	82775.1	87586	508144	3822.68
D6	3	351296	77014.9	83416.8	508108	2799.09
D7	3	307349	70651.7	82106.2	505235	3029.69
D8	3	336294	75943.1	81790.7	505414	2678.55
D9	3	340425	75309.4	80855.8	513142	3036.24
D10	3	269534	61139.1	71585.9	497933	2116.14
D11	3	218630	51346.4	56310.9	426039	607.676
D12	3	443518	96631.3	86275.4	660204	3925.17
E1	3	346517	84869.8	64802.6	505411	2581.94
E2	3	374375	89204.1	70355.5	494515	2517.51
E3	3	405956	90047	79326.4	506807	3057.41
E4	3	445247	101137	106571	671870	3268.47
E5	3	368839	83271.5	95333.5	593020	2524.42
E6	3	401165	92503.6	104160	626531	3304.18
E7	3	316605	75267.1	85399.7	512600	2587.15
E8	3	404583	93953.8	98332.5	586831	3384.72
E9	3	391394	91789.6	91584.9	566855	3223.4
E10	3	292666	68580.9	71614.3	479070	2181.7
E11	3	229524	54028.6	56206.2	408788	1391.47
E12	3	465474	102004	87250.3	646058	3524.27
F1	3	344873	91526.7	70673.1	539575	2565.62
F2	3	394088	97927.5	76681.5	545557	2207.2
F3	3	451107	106321	96557.2	621125	3170.63
F4	3	400685	86152.1	89406.7	560868	3245
F5	3	433934	91842.4	96699.4	592452	2975.29
F6	3	422386	95152.8	97003.5	579815	3354.69
F7	3	347982	82480.7	93040.7	563286	3022.87
F8	3	468467	115718	109599	649740	4400.31
F9	3	440563	100653	104654	657164	3528.82
F10	3	334248	75538.7	80946.9	554698	2296.95
F11	3	253542	59246.1	62124.6	456926	209.412
F12	3	455288	97240.9	88524.4	680096	3939.83
G1	3	330140	85531	64944.1	521344	2707.64
G2	3	413196	103425	80481.5	589911	2446.42
G3	3	506754	117772	107626	733264	3893
G4	3	452778	96139	98599.3	639188	3649.38
G5	3	407390	84224.6	92489.3	584272	3449.27
G6	3	426738	88262.2	94172.5	571984	3454.41
G7	3	362612	81006.9	88825.2	544253	3484.13
G8	3	434067	90771.4	99032.5	607181	4462.18
G9	3	445945	100349	98660	624891	3968.68
G10	3	331630	87819.5	75339.4	517531	1348.72
G11	3	269752	63697.9	62280.6	460686	2440.49
G12	3	496981	107368	93963	732507	3908.84
H1	3	376940	95638.8	65930.9	531266	2495.7
H2	3	392720	95609.9	70176.8	528990	2570.08
H3	3	468201	103402	87545.6	606322	4089.61
H4	3	436461	36861.5	20160.5	16095.8	4338.16
H5	3	439083	36930.6	20303.9	16434.4	4594.15
H6	3	403020	35413.1	19913.3	15919.5	4216.86
H7	3	380634	83837.6	94403.3	628481	2895.54
H8	3	436464	92773.9	102620	680149	4272.83
H9	3	457019	103726	101506	692951	4124.14
H10	3	333957	26148.5	13469.5	10721.1	2444.98
H11	3	293800	23409.8	11603.5	9375.54	2217.7
H12	3	574605	45102.9	21415.3	17370	4095.52
A1	4	239445	60729	41335.1	395140	1346.31
A2	4	260438	59413.3	45419.8	387731	1747.59
A3	4	305802	66711	53330.9	430054	2079.43
A4	4	309754	64168.1	52589.1	392139	2008.22
A5	4	328221	66207.4	54693.5	388917	2183.96
A6	4	292816	55568.6	50485.8	355984	1847.09
A7	4	270245	58825.4	55960.3	405541	2166.14
A8	4	315653	65494.2	62516.9	450184	3057.75
A9	4	350998	72898.7	68785.1	505055	2908.24
A10	4	291315	63726.6	62823.7	496338	2760.67
A11	4	228619	52597.9	48377.3	422769	0
A12	4	449400	98491.3	70916.3	589068	3815.29
B1	4	238929	59850.1	42386	369513	1882.33
B2	4	273344	62084.6	50273.4	403284	2052.18
B3	4	295567	64994	54919.2	406320	2089.08
B4	4	313812	70206.4	64502.7	463057	9464.45
B5	4	299948	65492.9	62421.6	429891	3166.56
B6	4	281406	58928.5	62612.6	427203	2653.87
B7	4	254667	56292.5	57752.1	394392	2377.21
B8	4	303092	64969.3	66171.7	447773	2560
B9	4	310005	65234.6	64186.2	443553	2665.33
B10	4	256133	56694.1	61998.4	464983	2772.84
B11	4	219619	51129.3	50800.8	401674	1407.14
B12	4	425599	95688.5	74060.3	594401	3381.07
C1	4	284860	70402.6	55279.1	450144	2869.09
C2	4	299754	70795.8	57512.1	436389	2505.96
C3	4	331102	75400.2	65740	464406	2529.35
C4	4	296774	61120	67118.9	467335	2674.35
C5	4	292890	62562.7	69653.6	468100	2708.47
C6	4	311713	68567.3	76287.3	500948	2635.29
C7	4	265100	53236.6	68906.4	455480	2484.77
C8	4	325918	68848.4	75279.2	484309	2746.38
C9	4	314373	67942.9	73020.5	487559	2227.52
C10	4	242884	51932.8	60363.5	432755	2323.84
C11	4	219444	49876.9	52110.1	397941	1860.7
C12	4	424555	91341.2	76797.2	592006	3444.55
D1	4	362521	95272	69231	548020	2807.45
D2	4	338605	79384.8	64530.6	465783	2194
D3	4	370900	86062.7	74455.9	495860	2994.15
D4	4	343972	74316.2	74093.8	476876	2593.79
D5	4	351258	83376.7	87949.5	509374	3585.6
D6	4	352810	77761.6	83598.4	509073	2844.19
D7	4	309287	71328.4	82497.7	505616	2910.82
D8	4	338030	76169.9	82171.9	506127	2752.97
D9	4	341986	75728.8	81256.4	514901	3437.59
D10	4	271272	61699.5	71649.6	498508	2290.65
D11	4	220301	51903.9	56793.1	426861	677.978
D12	4	444764	96480.9	86350.4	659680	4099.14
E1	4	346643	85293.5	64742.7	504535	2874.44
E2	4	375669	89550.4	70334.2	494846	2458.3
E3	4	408165	91010.1	79528.7	508565	2838.55
E4	4	446840	101764	107214	673498	3326.82
E5	4	370445	83759.7	95938.1	594480	3174.34
E6	4	403261	93255.5	104512	626956	3189.91
E7	4	318651	76241	85640.6	513118	2370.5
E8	4	407469	94861.2	98789.4	587588	3563.78
E9	4	393096	92787.8	91873.9	567467	3199.53
E10	4	294379	68726	71654.2	479265	1890.92
E11	4	230947	54640.4	56376.6	409427	1560.13
E12	4	465580	102172	87029.1	644311	3819.92
F1	4	344871	91238.5	70785	538788	2460.33
F2	4	396095	98147.3	77172	545923	2231.78
F3	4	452001	106738	96997.7	622935	3568
F4	4	401660	86750.4	89612.4	561631	3368.38
F5	4	435524	92017.7	96887.4	593562	3213.23
F6	4	424040	95758.9	97461.7	580187	3034.61
F7	4	349072	83376.6	93307.8	564238	2940.63
F8	4	470179	116651	109892	649522	4229.27
F9	4	442634	101369	105180	657720	3937.57
F10	4	335960	76201.5	81104.3	555324	2254.32
F11	4	255566	59572	62313.6	457878	580.223
F12	4	456283	97455.8	88722.5	678506	3681.13
G1	4	330015	85433.8	64883.7	519516	1851.25
G2	4	415720	104509	80736	590025	2668.49
G3	4	508189	118378	107967	734901	3862.69
G4	4	453605	96640.2	98730.3	638721	3437.15
G5	4	408866	85045.3	92634.2	584256	3558.65
G6	4	428538	88622.3	94167	573939	3547.92
G7	4	364498	81649.3	88863.1	544924	3226.32
G8	4	435511	91669.1	99197.6	608925	4403.88
G9	4	448536	101297	98858	625512	3958.54
G10	4	332859	88137	75757.5	518013	1335.63
G11	4	270091	63989.9	62667.4	461133	2196.32
G12	4	496470	107303	93758.1	729383	3662.07
H1	4	377622	96503.5	66062.4	529661	2334.3
H2	4	394566	96174.9	69945.1	528288	2376.6
H3	4	468696	103562	87560	604459	3688.02
H4	4	435738	37137.6	20230.8	16236.2	4450.09
H5	4	438875	36705.3	20238	16363.9	4299.72
H6	4	402411	35491.8	19857.5	15491.3	4169.49
H7	4	381734	84055.4	94460	626581	3295.66
H8	4	437840	93064.8	102624	679060	4186.55
H9	4	458274	103912	101733	690964	3911.08
H10	4	332943	26014.3	13296.9	11009.5	2652.44
H11	4	293478	23741.2	11574	9224.47	2636.26
H12	4	573425	44880.6	21781.6	16999.3	3783.75
A1	5	239173	61485.6	41471.2	394276	1691.64
A2	5	260381	59823.7	45413.2	387619	1655.22
A3	5	306761	67025.1	53543	429969	2028.42
A4	5	311165	64892	52418.5	391548	2104.47
A5	5	329520	66840.9	54936	389225	2064.07
A6	5	293715	55868.5	50615.6	355757	1959.47
A7	5	270868	58956	56230.4	405072	2121.9
A8	5	316996	65800	62724	449882	2956.46
A9	5	352249	73193.8	68751.6	505822	3203.21
A10	5	291962	64419.7	63021.1	497056	2938.8
A11	5	228442	52799.5	48629.9	422367	0
A12	5	449803	99120.3	70700.5	588183	4083.37
B1	5	239859	60080.7	42468.9	369084	1695.83
B2	5	273860	62518.2	50370.8	403712	2301.5
B3	5	296778	65386.5	54942.6	407104	2305.83
B4	5	314606	71060.1	64650.2	463951	9699.87
B5	5	301182	65702.6	62560.1	429620	2904.51
B6	5	282189	59532.6	62875.3	427526	2946.86
B7	5	255881	56813.8	57929.4	394663	2277.81
B8	5	303755	65445.8	66356.9	448064	2698.42
B9	5	311317	65582.2	64202.7	444076	2924.88
B10	5	256657	57156.9	62237.8	465698	2662.39
B11	5	220138	51513.1	50869.3	402002	1742.76
B12	5	427332	95978.8	74287.9	593854	3700.15
C1	5	285550	70807	55326.6	449277	3122.32
C2	5	301573	71474.8	57780.8	436176	2703.83
C3	5	332487	75938.1	66072.2	464882	2506.87
C4	5	297739	61655.9	67404.6	468648	2799.37
C5	5	293926	63052.3	69944.1	468141	2857.05
C6	5	313143	68846	76573.1	501546	3291.3
C7	5	266032	53323.9	68960.5	455986	2854.04
C8	5	327668	69202.2	75636.3	484794	2893.18
C9	5	315944	68419.1	73247.6	487688	2241.57
C10	5	243929	52344.5	60436.6	433529	2378.62
C11	5	220209	50322.5	52313.5	398227	1976.1
C12	5	425978	91590	76949.8	591924	3662.03
D1	5	377721	109516	70730.3	547739	2830.87
D2	5	339447	79918	64564.1	465752	2109.46
D3	5	371982	86734	74550.1	496249	2906.65
D4	5	345426	74819.5	74021.2	477478	2784.28
D5	5	351903	84154.9	88354.2	509892	3497.82
D6	5	353709	78240	83909.4	510263	3079.29
D7	5	310415	71880.2	82618.2	506560	2711.4
D8	5	339382	76910.2	82352.1	506862	2572.34
D9	5	343466	76355.1	81562.3	515254	3185.48
D10	5	271750	62012.8	71930.2	499056	1975.12
D11	5	220623	52422.2	56834.6	427526	556.635
D12	5	446365	97460.2	86642.2	660009	4368.99
E1	5	348357	85853.8	64702.8	504875	2577.84
E2	5	377277	90498.6	70712.6	495686	2786.23
E3	5	409031	91213.6	79582.2	508838	2962.68
E4	5	448392	102474	107503	675200	3290.91
E5	5	372371	84854.2	96100.2	594911	3030.93
E6	5	404259	93988.9	104619	627252	3050.24
E7	5	320269	76737	85632.7	513232	2779.41
E8	5	409013	95426.2	99057.7	588638	3471.2
E9	5	395114	93319.1	92202.1	567926	3519.02
E10	5	294977	69477.2	71864.5	480304	2273.24
E11	5	231908	54995.6	56523.2	409410	1510.79
E12	5	465532	102488	87069.7	645594	3950.69
F1	5	345393	91977.3	70892.4	537401	2734.69
F2	5	397532	98937	77398.3	547352	2239.97
F3	5	453107	107416	97041.4	623168	3092.41
F4	5	402354	86619.3	89807	562145	3494.85
F5	5	436006	92578	97238.1	593858	3108.19
F6	5	425668	96639.4	97670.7	581109	3132.22
F7	5	350179	83780.7	93383.3	564188	2791.45
F8	5	471680	117159	110260	650677	4404.35
F9	5	444592	101834	105286	657713	3752.07
F10	5	338096	76897.2	81620	556172	2432.32
F11	5	256157	60216.3	62520.2	458415	241.079
F12	5	456731	97566.7	88744.7	678575	3853.03
G1	5	329629	85514.5	64910	518823	2632.39
G2	5	418108	105050	80993	590765	2558.07
G3	5	510228	119250	108481	736498	3634.14
G4	5	454483	97077.9	99076.1	638654	3720.46
G5	5	410082	85369.6	93107.1	585145	3219
G6	5	429536	88984.3	94436.2	576081	3720.13
G7	5	364857	82195.4	89190.6	545182	3378.57
G8	5	437216	91855.4	99368.4	609585	4323.22
G9	5	449574	102054	99243.8	626157	3985.93
G10	5	334349	88978.4	76004	517925	1766.65
G11	5	271580	64507.6	62716.3	461390	1819.18
G12	5	496701	107931	93506.4	727186	3718.82
H1	5	377106	96684.8	65930.9	528652	2291.83
H2	5	394859	96747.3	70067.3	526698	2464.75
H3	5	469043	104370	87640.5	603912	4080.11
H4	5	434097	36924.9	20159.6	16250.5	4296.77
H5	5	438186	36885.6	20440.9	16342	4408.66
H6	5	401538	35299.2	19926.7	15774.1	3970.18
H7	5	382418	84176.8	94271.6	625988	3197.08
H8	5	438978	93072.2	102732	678251	4167.07
H9	5	460304	104628	101894	691252	4048.13
H10	5	333517	26164	13418.6	10769.1	2664.78
H11	5	293123	23408.4	11456	9685.7	2552.55
H12	5	572965	44909.1	21510.1	16971.8	4106.15
A1	6	238687	61344.5	41327.6	392751	1299.69
A2	6	260692	60043.8	45462.4	387571	1731.67
A3	6	307638	67487.5	53643.5	430835	1744.96
A4	6	312274	65243.8	52822.6	391566	2133.95
A5	6	330774	67231.8	55004.6	389417	1889.9
A6	6	295236	56166	50672.2	356669	1916.93
A7	6	272701	59490.8	56187	405518	2149.24
A8	6	318288	66027.5	62860.7	450044	2924.08
A9	6	353976	73708.9	68967.8	505969	2931.38
A10	6	292910	64668.6	63110.8	496806	3108.89
A11	6	229198	53240.9	48543	422299	0
A12	6	449850	99551.4	71095.2	587129	4041.91
B1	6	240555	60345.2	42441.7	368969	1534.64
B2	6	274751	62867.6	50540.5	403459	2065.48
B3	6	297879	65680	55333	407020	2275.43
B4	6	315466	71222.4	64929.8	464146	9407.53
B5	6	302508	66120.2	62412.3	429596	3047.75
B6	6	283443	59636.2	63045	427405	2810.45
B7	6	257046	57239.1	58090.9	394963	2490.38
B8	6	305501	65777.3	66469.9	448061	2521.02
B9	6	312831	65914.4	64398.3	444368	2597.15
B10	6	257511	57727.5	62233.3	465684	2912.02
B11	6	220532	51961.5	50810	402404	2020.9
B12	6	427984	96383.5	74363	593096	3922.94
C1	6	285214	70756.4	55192.6	448723	2747.4
C2	6	302021	71528.2	57758.8	436680	2342.28
C3	6	333335	76269.5	66118.1	465155	2770.01
C4	6	298800	61751.2	67275.3	468799	2768.12
C5	6	294854	63623.1	69990.6	468567	2906.28
C6	6	314232	69226.4	76678.2	501665	3101
C7	6	266465	53679	69107.7	455916	2460.97
C8	6	328389	69898.8	75671.4	484952	2747.21
C9	6	317016	68945.4	73291.6	488498	2204.37
C10	6	244475	52575.8	60656.9	434641	2485.55
C11	6	220994	50715	52430.2	398928	2130.31
C12	6	426602	91932.7	76734.1	591034	3573.06
D1	6	378696	110779	70724.3	547773	2885.1
D2	6	340026	80400.8	64887.9	466223	1915.22
D3	6	372979	87318.3	74726.6	496541	3006.36
D4	6	346619	75522.7	74538.9	478432	2900.74
D5	6	353451	84796	88787.5	510301	4070.87
D6	6	354953	78731.8	84108.1	510301	2807.73
D7	6	311989	72307	82719.2	506057	2838.12
D8	6	340841	77266.6	82521.5	507263	2701.13
D9	6	344200	76800.9	81636	515360	3236.07
D10	6	273268	62770	72258.6	499834	1822.65
D11	6	222281	52825.7	56740.9	428144	702.054
D12	6	447231	97858.6	86553.1	659418	3991.4
E1	6	348850	86124.4	64905	504952	2538.2
E2	6	378845	90827	70795.2	496432	2440.08
E3	6	410868	92007.9	80036	509829	3290.41
E4	6	450452	102985	107536	674568	3588.25
E5	6	373397	85396.7	96352.5	595808	2893.62
E6	6	406096	94674.4	104941	629762	3584.49
E7	6	321724	77814	85755.6	513750	2312.92
E8	6	410385	96175.7	99336.1	588680	3686.88
E9	6	397431	94250.9	92261.3	568248	3032.43
E10	6	296824	69847.9	71945.2	480580	2341.44
E11	6	232876	55474.9	56646.2	409725	1429.15
E12	6	466464	102888	87134.3	644155	3737.07
F1	6	346319	92442.3	70878.8	537634	2733.21
F2	6	399740	99876	77689.5	547056	2041.02
F3	6	455027	108017	97522.3	626406	3253.02
F4	6	403345	87382.2	90034	562067	3055.81
F5	6	437111	93255.9	97297	593646	3173.57
F6	6	427235	97420.2	97918.2	580893	3543.75
F7	6	351108	84224.9	93456.9	564376	2835.44
F8	6	472839	117742	110409	651498	4158.43
F9	6	446195	102552	105417	658719	3649.61
F10	6	340161	77561.1	81659.4	556410	2399.27
F11	6	256906	60535.7	62724.7	458616	454.576
F12	6	458388	97850.4	88731.4	677614	3682.85
G1	6	329865	86021.7	64925.5	517475	2477.36
G2	6	419224	106010	81603.1	591848	2328.64
G3	6	511616	120002	108774	736255	3795.77
G4	6	455680	97672.9	99260.4	640153	3920.84
G5	6	411630	85979.7	93344.5	585516	3257.38
G6	6	430933	89812.1	94644.4	575762	3839.57
G7	6	366431	82928.7	89300.4	545111	3327.2
G8	6	438663	92897.8	99742.9	609867	4010.33
G9	6	452606	102838	99335.7	626605	4237.52
G10	6	335570	89757.5	76231	518257	1679.36
G11	6	272609	64928.4	62913.4	461545	2326.86
G12	6	496279	107791	93610.7	726676	3844.68
H1	6	377310	97139.1	66253.6	527725	2723.35
H2	6	395833	97159	70236.1	526860	2508.26
H3	6	469862	103717	87727.1	602897	3830.6
H4	6	433467	36945.7	20184	16202.1	4395.54
H5	6	437537	36804.4	20316.9	16205.9	4451.84
H6	6	401088	35403.4	19881.4	15795.6	4124.8
H7	6	382848	84047.7	94363.9	623558	3317.89
H8	6	439840	93580.5	102971	678121	4175.42
H9	6	461511	105194	102012	691156	4247.27
H10	6	332323	26214.3	13438.5	11066.2	2984.61
H11	6	292717	23388.4	11469.4	9441.05	3024.26
H12	6	572484	44701.1	21407.9	17234.2	4184.09
A1	7	238978	61385.5	41251.3	392081	1538.64
A2	7	262079	60508.1	45492	387452	1463.05
A3	7	308795	67979.9	53878.9	430392	1874.43
A4	7	313442	65831	52863.3	391786	1764.56
A5	7	331439	67538.4	55132.8	389027	2193.68
A6	7	295860	56455.8	50777.3	356369	2034.93
A7	7	273127	59826.2	56386.4	405328	1994
A8	7	318872	66395.1	62970.8	449680	2844.38
A9	7	354469	74147.7	69063.5	505969	2999.82
A10	7	293651	65234.2	63194.6	497022	2854.26
A11	7	229839	53986.5	48618.5	422543	0
A12	7	450932	99804.9	71127.8	586958	3974.2
B1	7	240956	60705.2	42559.9	368718	1781.08
B2	7	275695	63378.3	50486.7	403493	2069.91
B3	7	299145	66227.8	55318.8	407802	2086.14
B4	7	317252	71484.8	65054.1	464978	9421.33
B5	7	303613	66560.2	62531.4	430111	3065.45
B6	7	283879	59837	63358.9	428434	2638.53
B7	7	258107	57547.3	58340	395935	2528.61
B8	7	305594	66366.8	66520.1	448207	2692.85
B9	7	314143	66419.2	64627.7	444517	2707.22
B10	7	257956	57688.9	62375.4	465716	2772.84
B11	7	220816	52167	50783.4	402598	1798.18
B12	7	428697	96946.3	74550.2	592742	3460.56
C1	7	284957	70677.4	55273	448379	2854.34
C2	7	302644	72395.7	57884.8	436904	2141.31
C3	7	335044	77157.4	66144.4	465133	2550.88
C4	7	299407	62312.5	67476.5	468796	2999.61
C5	7	295483	64001.1	70135.5	468904	2851.68
C6	7	314840	69791.5	76792.2	501838	3166.84
C7	7	267502	53662.3	69239.8	456360	2697.3
C8	7	329579	70281	75792	485163	2576.48
C9	7	318157	69313.7	73615.6	488614	2387.04
C10	7	245698	52885.1	60776.5	434679	2169.97
C11	7	221395	50889.6	52485.6	399899	1744.28
C12	7	427667	92659.6	77100.3	591668	3634.57
D1	7	380791	112229	70960.7	547989	2710.09
D2	7	340995	80920.6	64937.7	466237	2166.82
D3	7	374229	87770.2	75010.3	496639	3012.46
D4	7	347407	75835.2	74654.1	478541	3153.41
D5	7	354530	85446.3	89325.9	511240	4023.45
D6	7	356551	79151.8	84149	511208	3098.48
D7	7	313369	72768.9	82869.8	506522	2932.43
D8	7	341835	77759	82771.8	507393	2740.43
D9	7	346042	77444.5	81852.3	516129	3354.96
D10	7	274364	63031.2	72356.8	500128	2252.75
D11	7	222193	53366.5	57073.3	428088	834.953
D12	7	449004	98493.2	86700	659862	3991.4
E1	7	349808	86843.2	64960.8	504793	2635.25
E2	7	379916	91859.1	71006.1	496513	2352.41
E3	7	411535	92404.5	80231.8	509936	3287.15
E4	7	451212	103833	107962	675627	3453.61
E5	7	374574	85877.2	96573.7	595999	3273
E6	7	407078	94974.7	104916	629568	2993.59
E7	7	322977	78193.7	86050.5	513650	2341.22
E8	7	411852	96724	99512.6	589342	3307.4
E9	7	398698	94669.5	92679.7	569036	3466.69
E10	7	297521	70688.5	72316.1	480642	2262.47
E11	7	233771	55727.7	56740.9	409952	1565.51
E12	7	467580	102974	87217.2	643115	3759.81
F1	7	346475	92826	71048.1	537577	2448.47
F2	7	400473	100522	77683.6	548014	1962.61
F3	7	455731	108853	97725.6	626513	3214.43
F4	7	402873	87873.1	90043.1	562006	3469.15
F5	7	437663	93393.7	97550	593792	3168.21
F6	7	428084	97670.9	97887.6	580470	3319.52
F7	7	352187	84788	93623.1	564306	2894.73
F8	7	473849	118545	110648	652364	4437.75
F9	7	448115	103001	105889	659583	3801.68
F10	7	340983	78078.1	81894.4	557557	2288.42
F11	7	258340	60915.4	62737.2	459463	117.475
F12	7	458233	98320.5	88915.3	678180	3860.76
G1	7	330489	86438.4	65052.6	517977	2444.25
G2	7	421172	106802	81448.4	592895	2977.66
G3	7	512153	120535	108843	737742	3322.24
G4	7	455566	98354.8	99288.9	640264	3658.27
G5	7	412399	86500.5	93256.7	585558	3207.48
G6	7	432520	90339.4	94899	576367	3566.44
G7	7	367089	83210.3	89482.2	545191	3381.38
G8	7	439692	92769.2	99547.9	610848	4500.08
G9	7	453931	103462	99454.8	626383	4177.67
G10	7	336529	90153.6	76363.5	518711	1487.31
G11	7	273419	65403.9	63051.7	462180	2221.7
G12	7	497733	108179	93812.9	725181	3736.1
H1	7	378053	97455.9	66152.8	527418	2388.67
H2	7	397068	97700.5	70273.4	526882	2479.64
H3	7	469955	104472	87486.7	602935	3890
H4	7	432959	36671.5	20123.1	16234.3	4392.71
H5	7	437551	36792.4	20314.9	16288.4	4270.28
H6	7	400628	35270	19922.2	15954.5	4291.04
H7	7	382973	84392.6	94525.4	623769	3552.74
H8	7	440743	93670.7	102847	678411	4277.46
H9	7	462837	105656	102111	691051	4193.74
H10	7	332772	26126.6	13264.7	10755.6	2905.58
H11	7	291507	23255.5	11528.4	9375.54	2556.53
H12	7	571655	45135.5	21818.8	17415.9	4123.87
A1	8	239728	61337.9	41252.8	391133	1637.72
A2	8	262288	60664	45577.2	386509	1721.05
A3	8	309186	68290.8	53875.9	431045	2197.13
A4	8	314230	65946.4	52942	392072	2264.02
A5	8	332793	67858.8	55103.4	389187	2184.77
A6	8	296183	56777.4	50932.7	356520	2449.14
A7	8	274633	60286.7	56432.2	405338	2296.44
A8	8	319654	66742.1	62912	449958	2877.59
A9	8	355970	74421.9	69233.8	506281	2953.55
A10	8	294464	65481.1	63248.4	497092	2764.69
A11	8	230178	53986.5	48705.3	422474	0
A12	8	451084	100114	70707.6	585422	4189.77
B1	8	240961	61483.9	42682.2	368680	1841.03
B2	8	276169	63803.7	50635.7	403521	2055.51
B3	8	299981	66769.5	55610.6	408240	2134.19
B4	8	317237	71687.9	65058.4	465099	9649.85
B5	8	303627	67045.5	62836.2	429910	3094.94
B6	8	284835	60162.2	63306	428293	2809.65
B7	8	258965	57769.1	58414.1	395949	2549.25
B8	8	306781	66639.2	66732	448824	2746.95
B9	8	314774	66872.6	64646.6	444608	2646.43
B10	8	258511	58115.9	62500.4	465945	2663.29
B11	8	222279	52794.8	51110.5	401874	1830
B12	8	429575	97082	74388.8	592974	4121.1
C1	8	284812	70912	55471.5	448796	2993.25
C2	8	303668	72594	57964.5	436270	2555.69
C3	8	335684	77232.8	66257	465174	2732.56
C4	8	300134	62609.7	67656.3	469730	2940.03
C5	8	296407	64446.6	70282.1	468901	2743.38
C6	8	315447	69870.7	76871.6	502013	3050.41
C7	8	267719	54079.7	69502.4	456153	2854.04
C8	8	330655	70496.1	75917.6	484999	2843.7
C9	8	319122	69777.3	73668.5	488810	2323.4
C10	8	246248	53174	60875.4	435219	2366.44
C11	8	222507	51151.6	52564.1	399494	1985.29
C12	8	428087	92806.7	76905.6	591772	3542.31
D1	8	382500	114132	71250.8	548371	2891.26
D2	8	341865	81256.2	65068.7	466313	2329.86
D3	8	375352	88194.3	75065.4	497368	2725.56
D4	8	348383	76295.9	74680.2	479050	2982.66
D5	8	355048	85857.5	89442.8	511361	3754.08
D6	8	357449	79509	84441.9	511017	2876.81
D7	8	313986	73284.6	82956.2	506185	2984.5
D8	8	342752	78383.5	83022.9	507737	2533.87
D9	8	347196	77765.9	81952	516407	3440.96
D10	8	275050	63639.2	72533	501015	2127.6
D11	8	223334	53695.4	56986.3	428542	837.842
D12	8	449641	98890.5	86901.7	658432	4266.19
E1	8	351051	86798.1	65198.9	504223	2394.69
E2	8	381170	92248.9	70981.6	497396	2300.03
E3	8	413040	92961.5	80201.9	510416	2738.38
E4	8	452414	104387	108118	675968	3584.89
E5	8	375402	86324.3	96488.6	595969	2955.66
E6	8	409271	95702.6	105350	629975	3144.98
E7	8	323572	79016.5	86265.8	514519	2689.62
E8	8	412968	97079.1	99693.1	590149	3633.97
E9	8	400406	95369.2	92723.5	569008	3519.02
E10	8	298877	71054.8	72405.7	480850	1832.59
E11	8	234879	56284	56880.3	410338	1626.52
E12	8	467929	103369	87447.5	643909	3792.3
F1	8	347175	93596.6	71001.2	537077	2613.08
F2	8	401486	100737	77759.1	548679	2059.75
F3	8	457502	109283	97768.2	626162	3205.05
F4	8	403628	87724.2	90069.5	562835	3339.59
F5	8	438808	93950	97650.9	593505	3309.69
F6	8	429318	98142.8	98083.4	580168	3250.05
F7	8	352927	85353	93773.1	564194	2984.62
F8	8	475762	118983	111065	652552	4557.17
F9	8	449269	103662	105755	659771	3658.24
F10	8	342622	78923.8	82117.7	557255	2327.86
F11	8	259044	61261.7	62701.9	459323	397.371
F12	8	459228	98528.8	88865.5	677668	3734.42
G1	8	330502	86519.1	65010.7	517275	2391.57
G2	8	422584	107498	81575.7	592704	2754.37
G3	8	513473	121049	109017	738149	3789.45
G4	8	456507	98584.4	99420	639602	3630.63
G5	8	412594	86809.8	93508.4	585632	3375.39
G6	8	433205	90827.6	95002.1	576720	4042.33
G7	8	368414	83847.3	89595.7	545364	3327.2
G8	8	440648	93300.8	99987.1	611018	4075.43
G9	8	455489	104133	99734.6	626558	4399.84
G10	8	337727	90866.1	76473.2	519232	1644.44
G11	8	274132	65787.7	63218.1	462505	2344.99
G12	8	497288	108643	93754.2	723962	3354.84
H1	8	378187	97828.1	65898.5	526528	2142.33
H2	8	398244	97846.4	70311.8	526357	2478.49
H3	8	470378	104522	87719.9	602950	4029.02
H4	8	432430	36810.5	20104.3	16256.2	4311.82
H5	8	437422	36918.6	20333.9	16239.7	4154.46
H6	8	399551	35339.8	19804.2	15840.5	4160.55
H7	8	383773	84942.8	94528.3	623698	3324.66
H8	8	441070	94138.1	103108	678462	4259.84
H9	8	463933	105797	102206	691646	4252.62
H10	8	332087	25998.8	13483.2	11207.9	3197
H11	8	291661	23462.7	11519	9691.04	2880.75
H12	8	571077	45145.7	21651.4	17417.7	4804.09
A1	9	238825	61631.7	41359	389671	1120.47
A2	9	263428	60872.7	45633	386482	1891.99
A3	9	310617	68533.4	53807.9	430182	2049.02
A4	9	314752	66530	53138.3	392191	2238.87
A5	9	333448	68150	55179.3	389299	2303.85
A6	9	297242	57002.8	51063.3	357186	2137.68
A7	9	275329	60514.5	56461.9	405685	2233.7
A8	9	320369	67000.1	63030.5	449629	2845.21
A9	9	357393	74985.5	69379.2	506275	3202.25
A10	9	295807	65919.3	63480.7	497467	2912.64
A11	9	231302	54241.8	48799.1	422353	0
A12	9	452650	100448	70907.8	584768	3952.09
B1	9	241924	61569.1	42690.4	367841	2329.93
B2	9	277091	64212.7	50539.4	403570	2260.5
B3	9	300740	66797.7	55709.2	407652	2453.93
B4	9	318089	72206.9	65194.8	465212	9671.41
B5	9	304555	67564.7	62658.1	430117	3050.28
B6	9	285697	60448	63311.6	428077	2821.75
B7	9	259930	58135.5	58578.6	396144	2169.24
B8	9	307903	66950.3	66732.8	448083	2637.17
B9	9	315702	67079.4	64704.2	444960	2657.11
B10	9	259617	58345.6	62485.2	465659	2366.07
B11	9	222553	53098.3	50973.6	402122	2011.67
B12	9	430437	97864.4	74795.7	593188	3616.18
C1	9	285264	70799.2	55484.9	448770	2853.11
C2	9	304472	72930.8	57975	435969	2587.8
C3	9	336387	77731.7	66592.9	465985	2717.57
C4	9	300980	62897.4	67860.4	469516	2924.4
C5	9	297396	64944.8	70465.4	468832	2727.27
C6	9	316494	70623	77060.3	502190	2841.65
C7	9	267973	54141.2	69551.7	455903	2598.83
C8	9	331484	70741.9	75951.8	484881	2561.64
C9	9	320312	70104.4	73820.8	488834	2453.16
C10	9	246145	53036.7	61044.9	435278	2116.06
C11	9	222887	51446.7	52768.4	399510	2146.65
C12	9	428294	93138.9	77066	591232	3749.9
D1	9	384538	115807	71382.1	548106	2522.76
D2	9	342750	81738	65004.7	466345	2078.26
D3	9	376190	88843.9	75210.8	497067	2992.11
D4	9	349334	76832.8	74789.6	479228	3437.66
D5	9	356232	86320.2	89752.3	511641	4098.11
D6	9	358264	79781.9	84631.2	511421	3133.02
D7	9	315275	74195.5	83105.9	506373	2964.85
D8	9	344331	78837.1	83028.7	507972	2534.71
D9	9	348256	78177.1	82040.9	516943	3381.1
D10	9	276117	63902.2	72517.9	500975	2311.8
D11	9	224119	54142	57062.6	428940	723.241
D12	9	450267	99175.1	86904.7	660106	4042.8
E1	9	351106	87485.5	65221.5	504763	2774.66
E2	9	382130	92380.7	71334.3	496913	2765.73
E3	9	413524	93539.5	80558.2	511285	2911.5
E4	9	452883	104687	108102	676236	3616.3
E5	9	376401	86667.6	96822.9	595998	2958.71
E6	9	410625	96504.2	105297	631103	3175.26
E7	9	324811	79193.2	86385.8	514476	2613.5
E8	9	414120	97757.9	99808.1	589565	3657.37
E9	9	401745	95759.5	92919.5	569028	3253.69
E10	9	300122	71576	72508.6	481010	2253.49
E11	9	235174	56836.6	56955	409649	1460.55
E12	9	468639	103949	87517.1	643880	3767.12
F1	9	347785	93903.9	71364.1	536678	2286.82
F2	9	403237	101391	78177.6	548688	2719.8
F3	9	458765	109825	97798	627052	3043.39
F4	9	403874	88029.8	90184	562767	3254.25
F5	9	439030	93977.4	97754.8	593405	3085.68
F6	9	430456	98622.3	98169.1	580705	3271.15
F7	9	354008	85682.1	93719.3	563863	3020
F8	9	477332	119497	111122	652373	4253.56
F9	9	450969	103987	106055	660276	3589.21
F10	9	343443	79820.7	82195.3	557255	2276.7
F11	9	259739	61433.8	62996.8	458986	353.446
F12	9	459921	99282.6	89077.9	678250	3842.71
G1	9	331330	87004.9	64922.4	516895	2567.67
G2	9	423991	108012	81911.3	593261	2672.17
G3	9	515206	121705	108842	738407	3486.4
G4	9	457476	98768.1	99427.9	639437	3768.82
G5	9	414053	87520.5	93527.5	586067	3305.35
G6	9	434846	91411	95025	576222	3941.41
G7	9	368844	84192.8	89593	544913	3471.05
G8	9	442258	93990.4	100030	610249	4417.48
G9	9	457742	104662	99839.6	627040	4078.25
G10	9	338753	91532.9	76605.7	519222	1573.51
G11	9	275431	66353.8	63230.3	463032	2039.18
G12	9	498357	109327	93764.7	722698	3643.56
H1	9	379414	98337.8	66111.9	525324	2477.01
H2	9	399298	98315	70377	525877	2295.32
H3	9	471324	104793	87962.6	603444	3737.92
H4	9	431861	36771.7	20010.7	16231.5	4560.15
H5	9	436430	36569.1	20296.9	16363.9	4401.79
H6	9	400088	35258.5	19759.9	15927.6	4251.72
H7	9	384143	85108.5	94486	623211	3210.61
H8	9	442461	94288.6	103073	677511	4194.9
H9	9	465481	106123	102294	689693	4122
H10	9	331507	26121.4	13192.6	11003.3	2846.31
H11	9	290925	23161.2	11532.4	9850.13	2599.05
H12	9	571208	45125.3	21526.9	17305.8	4363.01
A1	10	239366	62219.3	41393.4	389931	1251.61
A2	10	263512	61066.4	45769.7	386694	1908.97
A3	10	311709	69197.9	53950	431087	2178.5
A4	10	315835	67031	53186.9	392180	1851.28
A5	10	333557	68631	55270	389363	2198.54
A6	10	297893	57468.1	51097.5	357165	2046.17
A7	10	276513	60982.9	56479.6	405650	2426.75
A8	10	320677	67311.6	63124.9	449536	2977.22
A9	10	358291	75446.2	69569.6	506349	3021.99
A10	10	296346	66400.9	63411.9	497076	2806.96
A11	10	231777	54598.5	48897.4	422338	0
A12	10	452569	101027	70702	583977	3892.67
B1	10	242117	61697	42693.1	368062	1939.61
B2	10	277294	64284	50898.3	403245	2650.55
B3	10	301224	67359.6	55607.5	407353	1822.3
B4	10	319275	72567.1	65382.9	465426	9498.94
B5	10	305653	67379.9	62760.2	429882	3171.62
B6	10	286081	60862.9	63369.3	428418	2869.38
B7	10	260895	58606.6	58505.3	396020	2701.41
B8	10	308386	67118	66774.4	448624	2625.23
B9	10	317081	67433.6	64792.2	444989	2665.33
B10	10	259639	58750.1	62533.5	465840	2936.26
B11	10	223454	53150.4	51251.6	402680	1827.95
B12	10	431282	98580.6	74636.5	592270	3686.71
C1	10	285048	71304.7	55583.6	448239	2952.68
C2	10	304737	73590.1	58210.2	436245	2577.44
C3	10	337043	78139.3	66760.9	465612	2680.11
C4	10	301598	63100.2	68060.6	470159	2710.49
C5	10	298298	64878.2	70545.8	469238	2780.08
C6	10	317328	70848.9	77166.2	501973	3201.37
C7	10	268581	54034.2	69533.4	455826	2337.06
C8	10	332159	71073.7	76050.4	484858	2940.19
C9	10	320869	70595.7	73956	488767	2519.28
C10	10	247152	53547.7	61025.2	435460	2561.18
C11	10	223013	51669.5	52669.8	400244	1903.59
C12	10	428960	93504.7	77050.5	591090	3617
D1	10	386098	116859	71595.7	547909	2816.08
D2	10	343147	81760.7	65218.9	466115	2338.92
D3	10	376550	89340.2	75299	497209	3095.89
D4	10	350010	77322.5	74941.5	479205	3145.51
D5	10	357289	86826.1	89928.2	511815	3803.52
D6	10	359259	80324.8	84849.9	511701	3035.15
D7	10	316200	74448.2	83454.6	506877	3059.16
D8	10	344861	79088.2	83217.2	507811	2989.64
D9	10	349662	78813.2	82164.1	516240	3352.43
D10	10	277198	64290.5	72720.6	501144	2087.06
D11	10	224795	54452.2	57259.8	428829	598.046
D12	10	451623	99663.7	87112.5	660609	4449.06
E1	10	351791	88106	65304	505241	2558.71
E2	10	382527	92702.4	71217.1	497420	2598.35
E3	10	413791	93723	80582.8	510925	3022.56
E4	10	455307	105413	108279	676564	3451.36
E5	10	377236	87002.2	96766.9	596344	3107.21
E6	10	411922	97034	105435	629458	3153.77
E7	10	326162	79968.8	86463.4	513949	2485.66
E8	10	415406	98215.1	99928.1	590594	3527.15
E9	10	403246	96563	93099.1	569573	3474.95
E10	10	300364	72013.1	72518.4	481033	2056.95
E11	10	235846	56985.1	56984.2	410236	1556.54
E12	10	469721	104435	87542	643191	3907.64
F1	10	348702	93962.9	71194.8	536793	2441.05
F2	10	404145	102033	78050.2	548684	2318.38
F3	10	459070	110364	98137.4	626541	3388.61
F4	10	404675	88425.1	90582.3	563325	3495.88
F5	10	440447	94982.6	97907.1	593443	3222.87
F6	10	432016	99374.4	98365	580658	3294.89
F7	10	354732	86096.2	94074.2	564141	2743.63
F8	10	477897	119871	111242	652941	4610.81
F9	10	452192	104256	106177	660266	3475.97
F10	10	345171	79934.5	82223	558100	2136
F11	10	260931	62252.3	63228.3	459343	539.363
F12	10	460194	99489	89191.6	676574	3874.51
G1	10	332093	87232.1	65162.6	516983	2442.74
G2	10	426056	108624	82063.5	593667	2891.78
G3	10	515228	122064	109275	738622	3803.34
G4	10	457924	99312.2	99706.7	640856	3765.86
G5	10	414707	88065.8	93667.6	586429	3515.47
G6	10	435868	92169.5	95177.4	575514	3922.89
G7	10	370056	84641.8	89713.8	544759	3539.24
G8	10	442585	94177.7	100133	609316	4000.61
G9	10	459003	105171	99835.6	627171	4146.22
G10	10	340235	91994.5	76780.5	519195	1717.55
G11	10	276097	66472.4	63532.6	462855	2221.7
G12	10	499970	108991	93747.7	723142	4119.83
H1	10	378405	98786.3	66362.8	524696	2487.2
H2	10	399954	98596.9	70351.4	525512	2436.13
H3	10	472039	105124	87944.6	602862	3855.55
H4	10	431118	36794.4	20098.7	16387.1	4604.35
H5	10	436482	36841.5	20352.9	16158.2	4602.99
H6	10	399298	35233.8	19792.7	15945.5	4054.19
H7	10	384973	85220.3	94509.1	623054	3494.76
H8	10	443582	94843.4	103281	677544	4265.4
H9	10	465794	106597	102372	690696	4045.99
H10	10	331992	26130.4	13296.9	11067.4	2715.41
H11	10	291683	23582.7	11536.4	9141.58	2561.85
H12	10	571988	44833.7	21593.8	16865.4	4564.95
A1	11	239303	62083.1	41234.8	389233	1551.76
A2	11	263523	61576.6	45818.9	386675	1783.69
A3	11	311810	69599	54039.3	430857	1832.25
A4	11	316626	67007	53266.5	392261	2401.02
A5	11	333932	68692.7	55421	389435	2153.99
A6	11	298571	57753.2	51169.2	356920	2070.25
A7	11	276949	61205.2	56699.1	405021	2530.51
A8	11	321651	67469.9	63155.5	449225	2775.47
A9	11	358512	75561.4	69384	506366	3093.32
A10	11	297003	66702.5	63483.7	497638	3012.28
A11	11	232887	54771.5	48786.5	421942	0
A12	11	453516	100854	71073.9	582193	3862.27
B1	11	242186	61993.8	42746.1	368303	1935.61
B2	11	278139	64654.5	50791.6	403739	2123.1
B3	11	302488	67287	55893.2	407803	2433.33
B4	11	319437	72872.1	65388.9	465433	9811.12
B5	11	305935	67966.7	62816.8	430146	3001.41
B6	11	286306	61099.3	63553.4	427639	2950.9
B7	11	261247	58719.3	58758.9	395956	2548.49
B8	11	308932	67453.3	66929.8	448082	2661.03
B9	11	317700	67878.9	64780.7	445254	2745.82
B10	11	260292	58607.5	62649.6	465643	2638.15
B11	11	223873	53592.6	51370.2	402943	1710.94
B12	11	432150	98607.7	74861.9	592674	3869.2
C1	11	285660	70755.1	55459.3	448216	2842.05
C2	11	305213	73717.6	58049.6	435804	2552.58
C3	11	338097	78596.3	66694.3	465811	2800.92
C4	11	302160	63244.6	68135.5	469298	2991.79
C5	11	299040	65420.5	70580.7	469175	2983.26
C6	11	317701	71193.6	77228.8	502554	2844.06
C7	11	269335	54164	69387	455920	2755.56
C8	11	333156	71388.9	76259.9	484985	2691.12
C9	11	321571	70814.8	73971.4	488665	2354.8
C10	11	247428	53520.5	61181.8	435492	2336.02
C11	11	223640	51687.5	52814.7	399948	1909.72
C12	11	429925	93400.5	77277.3	590179	3708.16
D1	11	386664	118316	71996.8	547952	2907.28
D2	11	343781	82167.3	65215.9	465907	1931.32
D3	11	377329	89315.5	75311.1	496881	3034.84
D4	11	351221	77460.6	75083.8	479407	2975.75
D5	11	357976	87139.8	90248.5	511857	3518
D6	11	359754	80469.3	84976.4	512074	3086
D7	11	317184	74766.7	83415.8	506691	3141.68
D8	11	345863	79545	83299.8	507914	2767.19
D9	11	350020	78952.5	82320	516485	3227.64
D10	11	277479	64559.7	72840.1	501417	2043.87
D11	11	225487	54977.4	57428.8	428727	824.36
D12	11	452288	100325	87101.4	660466	4403.59
E1	11	352681	88112.8	65258.8	504760	2472.6
E2	11	383221	93009.5	71490.5	497075	2614.29
E3	11	414736	93874.9	80531.5	511072	3304.57
E4	11	456473	105789	108524	676921	3496.25
E5	11	378910	87611.4	97017.1	597022	2958.71
E6	11	412624	97038.6	105389	630396	3415.52
E7	11	326804	80202.1	86555.9	514249	2630.09
E8	11	416050	98683.9	99980.5	590208	3854.74
E9	11	404336	96768.6	93130.1	569295	3293.17
E10	11	301554	72290	72592	480470	2059.64
E11	11	236439	57347.8	57146.3	409908	1714.44
E12	11	469760	104380	87657.2	643082	3835.35
F1	11	349077	94351.4	71510.8	536704	2783.63
F2	11	404361	102691	78085.6	548602	2406.16
F3	11	461051	111119	98109.7	627067	3049.64
F4	11	405261	88691.2	90500.2	563144	3161.72
F5	11	441466	95254.2	97955.4	593490	3214.3
F6	11	432875	99625.1	98240.8	580568	3378.43
F7	11	355295	86330.2	93977	563783	3014.26
F8	11	479089	120464	111264	652726	4544.01
F9	11	453177	104708	106252	660331	3772.56
F10	11	345654	80535.6	82339.9	557650	2099.76
F11	11	261443	62113.5	63166	459169	186.938
F12	11	461070	99820.5	89093.9	677835	4207.99
G1	11	332188	87135	65295.8	515498	2490.91
G2	11	426698	108837	82227	593125	2767.86
G3	11	517430	122466	109396	738713	3692.22
G4	11	458541	99636.6	99924.4	639571	3416.42
G5	11	416075	88330.9	93996.6	586026	3389.78
G6	11	436413	92431.8	95264.1	575298	3824.75
G7	11	370827	85010.7	89784.9	545096	3370.17
G8	11	443367	94675.2	100297	610653	4456.35
G9	11	459579	105795	99985.1	627578	4402.89
G10	11	340986	92208.3	76694.7	518958	1503.67
G11	11	276200	67006.7	63462.9	463235	2073.02
G12	11	500900	109883	93784.2	721883	3932.28
H1	11	379572	98314.9	66562.6	523578	2796.41
H2	11	400660	98794.7	70515.5	525656	2281.59
H3	11	471405	105243	88067.2	602355	3968.42
H4	11	430586	36846.4	20192.4	16343.5	4682.43
H5	11	436946	36814.4	20274	16639.1	4281.07
H6	11	399217	35184.3	19794.5	15879.1	4224.9
H7	11	385450	85193.3	94507.2	621610	3348.82
H8	11	443948	94845.2	103348	677401	4386.93
H9	11	466830	106896	102271	690345	4339.34
H10	11	331949	26049.1	13443.5	10977.4	2668.49
H11	11	291466	23137	11473.5	9469.12	2812.98
H12	11	570156	45302.7	21699.8	17581	4481.69
A1	12	239077	62345.7	41124.1	387832	869.859
A2	12	264260	61910.2	45990.5	386420	1885.61
A3	12	313437	69798.1	54168.2	430685	2146.13
A4	12	316880	67325.9	53355.8	392421	2251.01
A5	12	334556	68690.2	55439	389082	2231.76
A6	12	298853	57865.1	51245.7	357234	2195.48
A7	12	277431	61521.7	56766.6	405653	2239.33
A8	12	322073	67491.3	63222.6	449907	2696.6
A9	12	359508	75821.3	69587.8	506144	2995
A10	12	297674	66920	63640.2	497812	2829.1
A11	12	232831	55227.2	49042.6	422609	0
A12	12	453850	101509	70923.4	582672	3820.82
B1	12	242540	62151	42865.6	368208	1898.31
B2	12	277877	64591.3	50772.2	403028	2281.56
B3	12	302296	67785.3	55899.3	407908	2173.43
B4	12	319870	72866.1	65325.1	465863	9748.16
B5	12	306882	68023.7	63106.4	429747	2809.29
B6	12	286742	61327.2	63584.7	428118	2834.67
B7	12	261963	58751.3	58604	396136	2238.05
B8	12	310092	67701.4	66922.7	447826	2923.55
B9	12	318159	67897.6	65017.4	445132	2846.85
B10	12	260563	59005.8	62834.5	465708	2963.2
B11	12	223836	53916.9	51377.3	402824	1820.76
B12	12	433399	98913.3	74703.8	592747	3791.95
C1	12	285254	70860.1	55528.8	447584	2692.08
C2	12	305452	73801.5	58254.3	436033	2336.07
C3	12	338660	78704.3	66661.4	465274	2896.43
C4	12	302595	63415.3	68074.2	470593	2751.51
C5	12	299429	65712.9	70647.8	469540	2389.83
C6	12	318523	71483.1	77358.9	502657	3011.07
C7	12	269232	54106.3	69574.8	455790	2860.6
C8	12	333301	71522.8	76257.5	484864	2945.14
C9	12	322696	71266.5	74058.5	489238	2282.9
C10	12	247466	53546.8	61001.1	435428	2212.56
C11	12	223954	51746.8	52995.9	400687	2222.22
C12	12	430206	93777.9	77212	591659	3702.67
D1	12	388749	119497	72051.7	548140	3158.69
D2	12	344776	82440.1	65269.7	465602	1837.72
D3	12	378285	89850.3	75512.6	497289	3073.5
D4	12	351434	77791.3	75173.8	479690	3289.61
D5	12	358486	87527	90358.5	512219	3402.99
D6	12	360372	80588.7	85035.4	511996	2834.59
D7	12	317723	74919.5	83425.5	506661	3101.41
D8	12	346375	79830.1	83374.1	507937	2794.79
D9	12	350687	79351.4	82356.8	516960	3555.64
D10	12	278336	65067.1	72886.1	501207	2656.41
D11	12	225520	54950.9	57430.8	429313	844.583
D12	12	452882	100276	87142.9	660520	4050.71
E1	12	352485	87998	65520.8	504833	2114.49
E2	12	383912	93277.6	71546.3	497590	2566.47
E3	12	415386	94127	80769.1	511152	3311.1
E4	12	457119	105788	108729	676358	3260.62
E5	12	379250	87790.7	97021.1	596624	2840.73
E6	12	413160	97679.8	105463	630674	3231.9
E7	12	328052	80611.2	86683.7	514470	2544.21
E8	12	417188	98938	100451	590633	3736.73
E9	12	405112	97045.2	93327.9	569506	3250.94
E10	12	302000	72771.4	72757	480806	2255.29
E11	12	236731	57301.8	57162.7	410510	1637.28
E12	12	470549	104889	87732.6	642611	3753.31
F1	12	349246	94649.1	71483.6	536905	2688.72
F2	12	404972	102762	78013.7	547949	2545.42
F3	12	461679	111157	98131	626006	3254.07
F4	12	405434	88839.1	90750.5	562876	3123.67
F5	12	441286	95263.3	98066.7	593330	2903.48
F6	12	432935	99881.8	98232.1	579243	3130.46
F7	12	355736	86484.7	94069.5	563642	2881.34
F8	12	479554	120721	111425	653333	4110.87
F9	12	453982	105246	106164	660099	3762.85
F10	12	346639	80360	82506.9	557660	2148.79
F11	12	261939	62509.3	62990.5	459505	382.048
F12	12	461434	100351	89144.5	677079	3895.14
G1	12	332530	87673.5	65336.1	516121	2605.29
G2	12	426849	109387	82229.5	593526	2642.72
G3	12	517857	122839	109524	738614	3525.54
G4	12	458899	99825.1	99699.8	640584	3627.67
G5	12	416205	88943.8	93765.8	585680	3382.11
G6	12	436751	92693.2	95662.1	576375	3864.56
G7	12	371346	85180.7	89831	544605	3533.63
G8	12	444138	94769.8	100565	611400	4236.74
G9	12	460645	106065	100346	626818	4057.96
G10	12	341374	92769.2	77008.6	519426	1524.41
G11	12	277329	67058.9	63581.6	462691	1926.76
G12	12	501201	110101	93917.3	720805	4021.12
H1	12	378687	98803.5	66282.6	524108	2378.47
H2	12	400926	99257.1	70508.6	525840	2631.9
H3	12	472144	105565	88045.5	601967	3793.76
H4	12	429989	36679	20060.3	16168.9	4673.96
H5	12	436285	36632.2	20380.9	16003.2	4450.86
H6	12	398791	35164	19959.5	15880	4179.32
H7	12	385519	85273.3	94632.1	623720	3332.39
H8	12	444746	95000.4	103463	678470	4231.08
H9	12	467392	106701	102450	690542	4192.67
H10	12	332421	25965.3	13385.1	10909.7	2983.37
H11	12	290780	23275.5	11383.7	9451.74	2552.55
H12	12	570768	44635.8	21798.3	17228.7	5209.75
A1	13	239414	62335.8	41311.1	387305	1374
A2	13	264474	62086.7	45762	385617	2024.7
A3	13	313720	70331.9	54259.5	430989	1938.19
A4	13	317476	67572	53316.9	392484	2352.46
A5	13	335093	69085.3	55421	389206	2101.33
A6	13	298871	57811.5	51235.3	356536	2065.43
A7	13	278722	61623.7	56791.6	405195	2203.94
A8	13	323135	67393.2	63208.5	449372	3154.06
A9	13	360296	76081.2	69671	506494	3095.25
A10	13	298171	67369.3	63760.9	497093	2745.57
A11	13	232954	55020.8	49134	422599	0
A12	13	453927	101726	70895	580925	4113.77
B1	13	242519	62690.2	42915.9	367584	1871.67
B2	13	278291	65168.7	50967.1	402948	2284.88
B3	13	302822	67913.4	56096.6	408491	2385.28
B4	13	320210	73047	65415.7	465747	9855.96
B5	13	307035	68009.6	63000	429859	3067.98
B6	13	287533	61227.5	63500.6	427934	2812.07
B7	13	262580	59163.5	58816.5	396161	2517.9
B8	13	309852	67727.2	66947.8	448270	2560
B9	13	318647	68238.7	65017.4	445082	2948.7
B10	13	260994	59116.1	62860.4	465398	2556.44
B11	13	224501	53908.6	51412.1	402291	1817.68
B12	13	433772	99206	75175.8	592902	3496.39
C1	13	285458	70819.9	55484.9	447696	3143.22
C2	13	306145	74108.9	58328.8	435657	2425.16
C3	13	339348	78868.1	66838.8	465159	2985.4
C4	13	303011	63539.9	68294.8	469987	2980.07
C5	13	299913	66068.4	70643.3	468994	2981.47
C6	13	319228	71692.7	77429.5	502878	2873.77
C7	13	269208	54000.8	69550.1	455653	2528.26
C8	13	334523	71605.6	76353.7	484578	2759.58
C9	13	323152	71010.9	74074	488985	2320.92
C10	13	248076	53528.2	61146.5	435208	2128.23
C11	13	223771	52118.1	52971.8	400016	2199.75
C12	13	430490	94148.3	77451	590453	3481.9
D1	13	389545	120587	72215.3	548340	3077.35
D2	13	345283	82441.1	65298.1	465755	2031.96
D3	13	377639	89760.4	75507.6	497472	2865.96
D4	13	352379	78252.9	75128.3	479757	3037.93
D5	13	358773	87941.9	90590.4	512291	4009.33
D6	13	361022	81055.4	85004.9	511698	3109.03
D7	13	318419	75247.2	83555.7	507004	3004.15
D8	13	348064	79945.1	83420.8	508311	2891.79
D9	13	352188	79475.8	82468.3	516892	3245.35
D10	13	278547	65216.2	72990.6	501590	2453.7
D11	13	226119	55249.3	57557.4	428739	576.859
D12	13	454330	100349	87287.8	660719	4169.32
E1	13	353470	88677.2	65582	504241	2577.84
E2	13	384886	93562.4	71469.3	496558	2359.24
E3	13	415642	94220.9	80583.9	510914	3005.14
E4	13	457066	106463	108602	676161	3574.79
E5	13	379299	88093.9	97159.2	595783	3144.84
E6	13	414229	97822.6	105861	629550	3361.8
E7	13	328729	80903.1	86737.7	513769	2613.5
E8	13	417979	99276.4	100188	591040	4069.4
E9	13	406149	97576.6	93329.7	569688	3186.67
E10	13	302746	72748.4	72884.8	480747	2175.41
E11	13	237373	57730.3	57070.7	410026	1637.28
E12	13	471860	105153	87769.9	642140	3702.14
F1	13	349271	94975.5	71607.6	536554	2811.81
F2	13	406461	103020	78321.4	548076	2174.44
F3	13	461967	111389	98352.4	626297	3464.75
F4	13	406106	88828.2	90463.7	562204	3498.96
F5	13	441875	95523.7	98166.5	592697	3214.3
F6	13	433713	100070	98351.9	579506	3073.3
F7	13	356901	86569.7	94029.9	563218	2828.74
F8	13	480057	120841	111542	653280	4394.23
F9	13	454581	105240	106680	659573	3578.43
F10	13	347154	80837.7	82586.6	557939	2331.06
F11	13	261817	62474.9	63196.1	459240	595.546
F12	13	462146	100508	89331.1	676547	4178.77
G1	13	333225	87500.5	65356.2	516292	2453.28
G2	13	427653	109634	82476.5	594268	2599.78
G3	13	518046	123379	109668	739342	3690.96
G4	13	460029	100287	99805.2	638352	3627.67
G5	13	417442	89501.3	94009	586049	3433.92
G6	13	437616	92902.2	95271.4	575791	3859.94
G7	13	371557	85618	90070	544778	3593.41
G8	13	445297	95315.6	100325	609134	4413.59
G9	13	461132	106646	100107	626814	4227.38
G10	13	341479	93156.6	76813.1	518560	1382.55
G11	13	277423	67345.8	63694.2	462907	2192.69
G12	13	501861	110421	93982.5	723996	3715.12
H1	13	379948	98900.8	66408.9	523839	2577.25
H2	13	401480	99270.7	70748.4	525840	2356
H3	13	472341	105868	88008.3	602897	3937.53
H4	13	430291	36800.1	20115.6	16560.7	4383.31
H5	13	436300	36914.6	20365.9	16389.7	4541.16
H6	13	398960	35345.1	19795.4	16084.6	4099.77
H7	13	385710	85497.8	94926.3	621233	3413.57
H8	13	444910	95258.8	103478	677229	4323.85
H9	13	468026	107068	102666	689563	4090.95
H10	13	332127	26076.2	13459.6	10975	2867.3
H11	13	290708	23399.8	11403.8	9625.54	2713.33
H12	13	570592	44996.8	21844.8	17746.2	4254.95
A1	14	239799	62583.6	40958.1	386450	1390.03
A2	14	265113	62203.7	45838.5	386325	1793.25
A3	14	314262	70402.4	54309.2	431267	1907.78
A4	14	317885	68079.2	53407.1	392971	1892.9
A5	14	335285	69044.7	55412	389463	2176.67
A6	14	299708	57841	51331.7	357095	1797.32
A7	14	279082	61990.8	56863.9	405409	2269.09
A8	14	323174	67755.9	63424.7	449052	2951.48
A9	14	361011	76345.9	69730.3	506250	3068.26
A10	14	298656	67338.9	63705	497564	2838.16
A11	14	234156	55670.9	49167.2	422335	0
A12	14	455031	101857	70926.2	580776	4051.58
B1	14	243685	62762.2	43131.9	367370	1566.61
B2	14	278239	64843.8	50922.4	403104	2280.45
B3	14	303289	68263.5	56120	408240	2073.39
B4	14	320829	73150.7	65546.9	466117	9882.69
B5	14	307503	68356.3	63065.9	430125	3106.74
B6	14	287296	61547.3	63789.6	428039	2695.03
B7	14	263077	59101.7	58904	396599	2267.11
B8	14	310536	68234.8	67050.6	448082	2942.65
B9	14	319172	68301.4	65076.6	445244	2796.74
B10	14	260870	59257	62806.8	465480	2866.22
B11	14	224830	54069.2	51512.3	402556	2076.33
B12	14	434082	99761.7	74974	592928	3744.93
C1	14	284607	70641.1	55570.2	447500	2936.7
C2	14	306615	74210.2	58224.9	436168	2387.86
C3	14	339626	79250.6	66813.5	465738	2835.56
C4	14	303360	63810.6	68291.9	470040	2912.68
C5	14	300640	66180	70814	468951	2627.92
C6	14	319530	72003.3	77502.5	503353	2982.16
C7	14	269921	54045.6	69797.6	455763	2524.98
C8	14	334650	71815.2	76443.4	485264	2822.26
C9	14	323087	71290.3	73943.7	488849	2088.66
C10	14	247929	53833.2	61182.6	435279	2304.72
C11	14	224417	52122.1	53009	400051	2099.67
C12	14	430058	94063.8	77366.9	590229	3843.27
D1	14	391161	121946	72353.8	548233	2697.77
D2	14	344980	82665.5	65415.9	464935	2168.84
D3	14	379127	90354.6	75544.7	497710	3009.41
D4	14	353272	78369.1	75335.4	479615	3297.51
D5	14	359735	88177.4	90932.3	512220	3616.87
D6	14	362030	81083.2	85020.1	512695	3021.71
D7	14	319270	75658.2	83447.8	506710	2999.24
D8	14	348117	79963	83459.2	507991	2907.68
D9	14	352608	79615.9	82450.7	516932	3488.18
D10	14	279381	65305.4	73195	501990	2277.43
D11	14	226762	55260.1	57473.3	428933	767.541
D12	14	454366	100638	87380.1	661151	4201.94
E1	14	353521	88656.7	65651.1	505176	2268.94
E2	14	385208	93764.6	71420.2	496817	2597.22
E3	14	416569	94258.9	80716.6	510969	3156.49
E4	14	458573	106763	108818	675986	3640.99
E5	14	380367	88469.5	97358.4	596418	2806.15
E6	14	414744	98141.4	106038	630422	3394.04
E7	14	329783	81248.8	86716.1	514509	2404.66
E8	14	419145	99764	100405	590703	3738.76
E9	14	406526	97527.5	93393.5	569663	3650.31
E10	14	303119	73055.4	72796.1	480087	2034.51
E11	14	237421	57770.7	57326.7	410010	1876.82
E12	14	471695	105268	87763.2	642057	3935.25
F1	14	350140	94601.3	71515.3	536486	2811.81
F2	14	406955	103491	78401.6	548243	2510.31
F3	14	462277	111671	98489.6	627174	3382.35
F4	14	406032	88601.5	90520.5	562304	3443.44
F5	14	442270	95749.7	98397.5	593129	3183.22
F6	14	434840	100425	98415.7	579690	3621.13
F7	14	357323	87312.9	94203.5	563092	2849.78
F8	14	480758	120940	111616	653511	4411.44
F9	14	455504	105318	106587	660272	3832.95
F10	14	347722	81204.7	82518.6	557592	2116.82
F11	14	263141	62399.6	63241.8	459442	268.66
F12	14	462930	100657	89536.3	676916	3820.37
G1	14	333082	87724.5	65382.6	516334	2352.44
G2	14	428564	110067	82520.2	593738	2423.11
G3	14	518209	123746	109721	738722	3655.6
G4	14	460217	100356	99937.2	638418	3463.8
G5	14	418162	89272.8	93947	586144	3326.46
G6	14	437605	93064.9	95485	576035	3600.69
G7	14	372641	85680.9	90019.3	544041	3447.7
G8	14	445235	95873.8	100737	609672	4387.36
G9	14	461888	107032	100315	627285	4037.67
G10	14	342581	93526.5	77004.2	518382	1773.2
G11	14	277760	67465.7	63782.3	462686	2241.04
G12	14	502400	110793	94081.7	722316	3526.34
H1	14	379648	98795.9	66356	523882	2685.98
H2	14	402096	99267	70613.3	525369	2239.23
H3	14	472186	105473	88136.9	602272	3907.83
H4	14	429824	36418.1	20051.9	16344.4	4256.32
H5	14	436340	36576.1	20229	16814	4805.16
H6	14	398589	35171.1	19942.6	15722	3970.18
H7	14	386232	85200.1	94768.7	621904	3461.9
H8	14	445513	95230	103475	677844	4306.22
H9	14	468203	106844	102581	692850	4285.81
H10	14	332344	26096.9	13314.3	10959	2894.47
H11	14	290397	23362.7	11678.5	9864.84	2884.74
H12	14	570831	45278.3	21718.4	17671	4444.49
A1	15	239179	62394.9	40896.7	386463	1426.45
A2	15	265085	62709.2	45835.3	385565	1757.15
A3	15	314898	70523.7	54245.3	430943	2100.03
A4	15	318097	67717.7	53675	392308	2335.12
A5	15	335498	69269.4	55479.8	388827	2343.55
A6	15	300108	58114.5	51307.8	356776	2142.5
A7	15	279739	61907.7	56985.3	404829	2214.4
A8	15	323865	67701.5	63204.4	449458	2850.19
A9	15	361303	76512.5	69782.9	506665	2718.34
A10	15	298855	67493.8	63832.6	497722	2548.31
A11	15	234204	55619.6	49368.4	422302	0
A12	15	453744	101953	70873.7	579430	3972.82
B1	15	243566	63023.7	42891.4	367433	1931.62
B2	15	278360	64963	51015.2	403062	2126.42
B3	15	303846	68121.2	56032.5	408112	2282.29
B4	15	320838	72956.1	65505.4	465900	9555.86
B5	15	307577	68329.9	63190.9	430517	3090.73
B6	15	287412	61799.9	63596.7	428006	2834.67
B7	15	263332	59132.2	58947.4	396565	2581.37
B8	15	311061	68403.2	67127.5	448457	2657.05
B9	15	319612	68539.1	65079.9	445152	2850.13
B10	15	261426	59334.1	62996.2	465293	2799.78
B11	15	225160	54139	51443.8	402772	1856.69
B12	15	434381	99694.5	75049.1	592189	3948.69
C1	15	284671	70639.8	55657.9	447095	2771.98
C2	15	306063	74683.2	58152.4	434633	2451.06
C3	15	340714	79152.9	66861.3	465069	2799.98
C4	15	303533	64000.3	68531	470370	2858.96
C5	15	300825	66449	70841.8	469528	3330.54
C6	15	320081	72230.7	77491.3	502898	3219.03
C7	15	269939	53946.9	69796.8	455669	2775.26
C8	15	334890	71529.9	76489.8	484789	2726.59
C9	15	323412	71609.4	74097.6	488800	2344.89
C10	15	248252	53750.2	61105.2	435342	2140.41
C11	15	224429	52158.3	53147.9	400001	1929.12
C12	15	429741	94003.6	77435.5	591082	3855.35
D1	15	391855	122778	72430.2	547594	2838.26
D2	15	345079	82511.1	65390.5	465263	2091.34
D3	15	378962	90007.5	75676	497516	2934.12
D4	15	353984	78538.1	75519.3	480115	3441.61
D5	15	358731	88341.1	90908.7	512481	4030.52
D6	15	361923	81272.6	85185.6	512363	3046.66
D7	15	319769	75732.3	83612	506770	2654.42
D8	15	348967	80565.6	83638.5	508361	2568.16
D9	15	353639	79901	82651.8	516657	3222.58
D10	15	279478	65656.6	73253.4	501667	2079.12
D11	15	226733	55544.7	57546.7	429184	726.13
D12	15	454773	100759	87373	660568	4143.62
E1	15	353152	88625.3	65596.6	504218	2614.75
E2	15	385003	93658.5	71669.1	497254	2534.59
E3	15	417019	94730.4	80930.7	511538	3207.66
E4	15	458887	106950	108840	675921	3533.27
E5	15	381020	88537.2	97366.4	596647	2925.15
E6	15	415074	98127.6	105762	630969	3243.62
E7	15	329801	81416	86751.5	514402	2740.37
E8	15	419671	99829.7	100458	590571	3561.74
E9	15	407399	97624.8	93431.8	569551	3305.11
E10	15	303691	73319.1	72927.4	480061	2131.44
E11	15	237919	58165.4	57375	409514	1592.43
E12	15	472094	104993	88041.7	642596	3734.63
F1	15	350158	94822.7	71736.1	536598	2994.22
F2	15	407758	103810	78551.3	548171	2168.58
F3	15	462936	112075	98529	625721	3384.44
F4	15	405766	88859.8	90761.7	562832	3492.8
F5	15	441701	95600.7	98138.2	592850	3149.99
F6	15	434937	100593	98498.8	579454	3320.4
F7	15	357509	87033.2	94396.1	562639	2744.59
F8	15	481734	120939	111622	652235	4591.58
F9	15	456212	105305	106749	659384	3768.24
F10	15	349130	81973.9	82576	557319	2139.2
F11	15	262923	62772.8	62944.9	459309	442.318
F12	15	463386	100801	89477.7	676764	3825.52
G1	15	333298	87803.5	65320.6	516402	2948.45
G2	15	429265	110189	82581.3	594331	2559.29
G3	15	519183	123571	109644	738974	3762.94
G4	15	460117	100804	99807.1	637934	3819.17
G5	15	418532	89804.9	94156.7	586580	3410.89
G6	15	438458	93448.2	95777.1	575285	3608.1
G7	15	372917	85886.1	89846.7	544528	3702.7
G8	15	446161	95812.3	100525	610622	4409.71
G9	15	463018	107100	100435	627607	4205.06
G10	15	343217	93904.1	77182.4	518330	1473.12
G11	15	278428	67692.6	64055.3	463039	2375.21
G12	15	502990	110878	94326.9	721855	3700.32
H1	15	379664	99254	66239.9	522250	2480.41
H2	15	401843	99003.6	70874.1	525897	2086.97
H3	15	471792	105554	88090	602188	3981.49
H4	15	428522	36822.7	20184	16143.3	4434.1
H5	15	436094	36621.1	20269	16340	4363.51
H6	15	397785	35509.4	19824.6	15800.1	4048.83
H7	15	386489	85301.2	94609.1	621242	3148.76
H8	15	446408	95738.2	103627	677990	4317.35
H9	15	468990	107403	102823	691161	4418.57
H10	15	331839	26233.7	13459.6	11259.7	3015.48
H11	15	290726	23521.2	11493.6	9554.68	2832.92
H12	15	571094	45225.2	21800.2	17461.8	4880.26
A1	16	239772	62508.2	41222.9	385642	1356.51
A2	16	266234	62731	45906.3	385383	2101.14
A3	16	315455	70811.9	54352.9	430198	2538.47
A4	16	319113	68068.5	53520.3	392269	2067.19
A5	16	336670	69559.8	55568	388872	2104.57
A6	16	300666	58217.8	51482.3	357123	1835.85
A7	16	280375	61922.8	56890.5	405855	2629.45
A8	16	324403	67929	63468.6	449253	2839.4
A9	16	362230	76698.1	69992.5	507045	3351.66
A10	16	299325	68123.1	63831.6	497840	2962.96
A11	16	234272	56034.8	49304.3	422531	0
A12	16	455803	102158	70680.7	579350	4428.83
B1	16	244394	63050.2	43035.5	366722	1939.61
B2	16	279532	65085.7	50892.5	402873	2264.94
B3	16	304388	68717.4	56068.1	407942	2093.98
B4	16	320972	73518.5	65657.3	465731	9761.96
B5	16	307906	68613.9	63332.7	430075	2966.86
B6	16	288015	61843.2	63764	428455	2934.75
B7	16	264076	59585.2	59104.4	396487	2556.9
B8	16	312025	68602	67235.8	448254	2648.3
B9	16	320252	68625.4	65276.4	445163	2937.2
B10	16	261944	59309.9	62916.7	465435	2602.23
B11	16	225788	54411.2	51449.9	402446	1706.84
B12	16	435498	99917.5	75174.7	591898	4033.77
C1	16	285094	70418.1	55588.5	447174	3126.01
C2	16	307195	74483.8	58137.7	434868	2796.03
C3	16	340053	79451.7	66954.2	465003	3193.29
C4	16	304686	64388.9	68403.7	469987	2774.96
C5	16	301486	66738.7	70976.8	468820	3002.05
C6	16	320472	72401.5	77528.2	502845	3189.33
C7	16	269472	53906.7	69565.2	455260	2711.25
C8	16	335722	71710.4	76600.7	484589	2871.74
C9	16	324794	71722.9	74402.1	488402	2226.69
C10	16	248413	53967.1	61304.8	435396	2355.14
C11	16	224739	52425.3	52981.8	399753	2122.14
C12	16	431028	94353.2	77505.2	590570	3843.27
D1	16	393170	123458	72639.1	547783	3004.64
D2	16	346207	82796.2	65361.1	465143	2066.18
D3	16	379358	90305.1	75761.2	496472	3163.03
D4	16	354033	78757.1	75559.9	479565	3082.34
D5	16	359500	88633.6	91225	512672	4132.41
D6	16	362771	81440.4	85338.7	512663	3121.51
D7	16	320507	75983.2	83690.7	506613	3107.3
D8	16	349449	80763.2	83740.3	508650	2660.15
D9	16	353449	79904.3	82684.5	516872	3377.73
D10	16	280453	65895.8	73282.7	501836	2328.55
D11	16	227183	55777.4	57480.1	429134	729.982
D12	16	455210	101179	87358.8	660550	4585.47
E1	16	353744	88625.3	65656.4	504952	2601.08
E2	16	386212	93735.6	71712.6	496827	2824.94
E3	16	417674	94726.2	81032.3	511683	3132.54
E4	16	459742	107370	108941	675889	3430.05
E5	16	381584	88863.2	97491.6	596322	3238.41
E6	16	416627	98857.3	105830	628634	3350.08
E7	16	330640	81720.2	87054.3	514306	2563.73
E8	16	420490	100400	100468	590651	3771.32
E9	16	407950	98177.1	93415.4	569434	3253.69
E10	16	304612	73266	72885.7	480043	2222.08
E11	16	238435	58115.6	57254.7	409270	1405.82
E12	16	472433	105202	87748.3	642028	3709.45
F1	16	350568	95201.6	71668.1	536466	2537.45
F2	16	408725	104660	78335.5	548116	2470.52
F3	16	463835	112452	98532.2	626729	3379.22
F4	16	406413	88817.4	90852.9	562676	3269.68
F5	16	443324	95745.6	98283.1	592699	2933.49
F6	16	435976	100758	98587.1	579059	3328.31
F7	16	358393	87270	94130.9	563147	2858.39
F8	16	482337	121536	112027	653306	4376.02
F9	16	456752	105414	106810	659694	3775.79
F10	16	349328	81566.4	82931.2	557365	2422.72
F11	16	263589	63221.3	63371.6	459173	263.552
F12	16	463926	101099	89387.1	676505	4170.17
G1	16	334553	88154.3	65514.3	516530	2453.28
G2	16	430334	110647	82621.2	593376	2765.41
G3	16	519997	123845	109941	739900	3773.04
G4	16	461182	100744	100057	638254	3706.64
G5	16	419228	89841.6	94116.7	585918	3408.01
G6	16	438808	93121.8	95809	576645	3779.39
G7	16	373540	86099.3	90038.6	544382	3443.96
G8	16	446470	96128.2	100735	609594	4448.58
G9	16	463686	107374	100548	627446	4183.76
G10	16	344695	94286	77102	518621	1418.56
G11	16	278445	67793.3	63946.3	462861	2134.67
G12	16	504680	111733	93951.2	722238	3837.27
H1	16	379143	99200.5	66320.1	521844	2658.79
H2	16	402231	99714.5	70939.3	525694	2459.03
H3	16	472805	105766	88117.6	601889	4050.4
H4	16	428904	36705.5	20001.3	16118.6	4208.35
H5	16	435782	36849.5	20379.9	16485.1	4699.17
H6	16	397974	35251.5	19861.9	15914.1	4252.61
H7	16	386479	85370.6	94763.9	621351	3428.07
H8	16	446708	96075.6	103542	677822	4566.89
H9	16	469893	107008	102774	690705	4018.15
H10	16	331983	26263.4	13659.5	11196.8	2810.5
H11	16	289963	23409.8	11641	9644.25	2874.11
H12	16	569222	45143.7	21727.7	17946.2	4658.83
A1	17	239297	61964.9	41028.4	384688	1288.03
A2	17	266148	62383.6	45939.1	385436	2117.07
A3	17	315680	70709.2	54453.3	430947	1907.78
A4	17	318863	68149.4	53602.5	392914	2152.16
A5	17	336157	69249.1	55673.3	389013	2191.25
A6	17	300758	58020.5	51536.4	357517	2319.1
A7	17	280355	62151.4	57077.8	405477	2586.01
A8	17	324162	68037	63367.6	449180	2841.89
A9	17	361559	76713.3	69942.7	505984	3214.78
A10	17	300170	68118.1	64049	497477	3073.67
A11	17	234513	56222.1	49476.9	422491	0
A12	17	455261	102585	70569.9	579131	4144.17
B1	17	244186	63128	43006.9	366934	1609.24
B2	17	279030	65193.2	50957.9	402109	2520.9
B3	17	304717	68561.1	56143.4	407828	2003.75
B4	17	321231	73391.9	65743.6	465959	9865.44
B5	17	308593	68732.7	63243.2	430197	2964.33
B6	17	288514	61695.6	63875.3	428048	3169.63
B7	17	264891	59277.7	59088	396779	2393.27
B8	17	311945	68540.5	67317.4	447987	2738.99
B9	17	320398	68552.2	65306.8	445228	2965.12
B10	17	261554	59334.1	62914.9	465462	2799.78
B11	17	225372	54658.4	51529.6	402218	1902.87
B12	17	435419	99745.2	75071.5	592867	3637.45
C1	17	284243	70269.1	55799.2	446951	3039.96
C2	17	306808	74834.7	58250.1	434674	2394.08
C3	17	341221	79581.1	67079	464644	2639.85
C4	17	304882	64193.7	68618.5	470278	2966.4
C5	17	301999	66828.7	70981.2	469323	3068.29
C6	17	320753	72503.2	77570	502631	3066.47
C7	17	270167	53987.1	69717.2	455360	2788.39
C8	17	335903	72165.8	76671.6	484386	2913.8
C9	17	325061	71768.1	74265.3	488779	2302.73
C10	17	248549	53710.3	61316	435895	2331.67
C11	17	224641	52236.6	53105.6	400261	2124.18
C12	17	431307	94376.3	77540.6	590690	3685.1
D1	17	394160	124689	72802.6	548296	2747.06
D2	17	345922	82887.9	65531.6	464572	2023.91
D3	17	379492	90402	75959.7	496577	3119.29
D4	17	355021	78824.3	75631.5	479889	3243.22
D5	17	360260	88921.5	91147.4	513025	3612.84
D6	17	362842	81442.2	85050.6	512515	3026.51
D7	17	320972	76087.8	83776.2	506562	2785.08
D8	17	350453	80710.6	83899.6	508374	2876.74
D9	17	353493	80402.9	82835.4	517208	3127.31
D10	17	280971	65786.3	73158.7	501918	2415.8
D11	17	227676	55872.6	57618.2	428590	812.803
D12	17	455755	101287	87500.7	662411	3907.38
E1	17	354157	89296.3	65732.2	505023	2122.69
E2	17	386092	94046.1	71763.9	496798	2630.24
E3	17	417884	94792.6	81116.9	511597	2992.08
E4	17	460571	107284	108848	675469	3551.23
E5	17	381882	89025.3	97539.6	595757	2956.68
E6	17	417194	98825.1	106183	629715	3277.81
E7	17	331675	81582.3	87096.6	514372	2674.99
E8	17	421747	100555	100615	591242	3579.04
E9	17	408955	98249	93784.6	569809	3539.22
E10	17	304993	73320	72965.5	479875	2364.78
E11	17	238300	58248.1	57244.7	409112	1597.81
E12	17	472590	105489	87987	641825	3824.79
F1	17	351106	95203.2	71848	536552	2624.95
F2	17	409254	104152	78663.3	548052	2293.81
F3	17	464529	112417	98657.8	626232	3523.15
F4	17	406919	88942.6	90723.1	562433	3432.13
F5	17	443789	95989.8	98228.5	592513	2972.07
F6	17	436385	100788	98706.9	578698	3214.87
F7	17	358568	87323.9	94279.1	562819	2841.17
F8	17	482914	121247	111713	652485	4201.95
F9	17	456741	105449	106800	660191	3615.1
F10	17	349955	81729.2	82888.6	557375	2202.09
F11	17	264560	63063.2	63095.4	459089	514.846
F12	17	463841	101172	89573.6	677245	3714.65
G1	17	332883	87688.3	65584	516250	2350.93
G2	17	430730	110719	82747.2	594587	2815.71
G3	17	520149	124382	109905	739457	3555.85
G4	17	460300	100728	100108	640371	3814.23
G5	17	419196	90141.5	94347.4	585921	3509.72
G6	17	439312	93629.6	95761.6	575273	3468.29
G7	17	374274	86372.8	89963.9	544572	3497.2
G8	17	446882	96074.3	100708	609585	4688.59
G9	17	464365	107626	100540	628015	4214.19
G10	17	343883	94262	77035.7	518468	1725.19
G11	17	278621	68086.6	63969.6	462866	2303.9
G12	17	505129	111889	93889.9	724102	3673.17
H1	17	379776	98759.6	66021.4	521659	2575.55
H2	17	403087	99495.7	70647.1	526144	2271.28
H3	17	472088	105852	88191	602521	3849.61
H4	17	428634	36850.2	20179.3	16477.2	4318.4
H5	17	436307	36822.5	20398.9	16484.1	4393.94
H6	17	397846	35143.7	19885	15672.6	4103.35
H7	17	386326	85241.5	94832.1	621478	3196.12
H8	17	446643	96030	103571	677123	4101.21
H9	17	470298	107115	102788	692044	4118.79
H10	17	331811	25749.7	13444.7	11015.7	3341.48
H11	17	290657	23321.2	11588.7	9499.87	2581.78
H12	17	570272	44843.9	21725.8	17617.7	4577.35
A1	18	239428	62522.9	40786	384649	1510.96
A2	18	266362	62868.6	46056.1	385512	2035.32
A3	18	315953	71090.7	54417.8	431125	1955.84
A4	18	319221	68054.3	53678.6	392585	2355.93
A5	18	336650	69492.5	55574.5	388649	2272.26
A6	18	301234	58335.1	51503	357937	2341.58
A7	18	281383	62607.1	56979.7	405342	2344.7
A8	18	325425	67913.3	63556.4	449332	2941.52
A9	18	363375	76976.1	70113	506461	3307.32
A10	18	300218	68163.6	64121.8	497681	3093.8
A11	18	235059	56194.6	49396.9	422685	0
A12	18	456172	102138	70781.4	578728	4692.76
B1	18	244373	62951.7	43055.8	366800	1385.44
B2	18	279165	65499.4	51065.7	402771	1904.81
B3	18	304714	68734.6	56185.1	408531	2149.89
B4	18	321860	73503.2	65746.2	466066	9693.83
B5	18	308773	68744.3	63303.2	430066	3239.03
B6	18	288770	61866.4	63787.2	428267	2782.2
B7	18	264867	59696.4	59114.9	396869	2513.32
B8	18	312630	68713.5	67144.8	447579	2915.6
B9	18	320955	68820	65358.6	445143	2781.96
B10	18	262570	59492.9	63090.9	465162	2662.39
B11	18	225696	54601	51683	402949	2251.83
B12	18	435978	100066	75174.7	592561	3641.93
C1	18	284197	69958	55824.8	446956	3085.44
C2	18	307374	74904.4	58355	434378	2336.07
C3	18	341602	79864	67187.9	464821	2647.34
C4	18	304891	64262.5	68703	470986	2927.33
C5	18	302303	66987.8	71136.8	469344	3045.91
C6	18	320665	72734.6	77853.3	503200	3108.23
C7	18	270042	53975.8	69837.4	455266	2821.21
C8	18	336399	72123.3	76503.7	484824	2799.16
C9	18	325652	71926.9	74363.9	489059	2517.63
C10	18	249162	53824.7	61366.7	435779	2499.46
C11	18	224860	52651.1	53128.8	399692	2354.98
C12	18	431803	94136.7	77472	591022	3543.41
D1	18	394496	125659	72845.6	547479	3050.24
D2	18	346295	82849.8	65492	464589	2032.97
D3	18	380044	90386.2	75839.4	497204	3128.44
D4	18	355312	79265.9	75479.6	480404	2945.15
D5	18	360572	89117.4	91476.6	513385	4133.42
D6	18	363512	81543.6	85226.5	512809	2918.08
D7	18	321874	76200.7	83896.6	507165	3252.69
D8	18	350787	80832.9	83711.9	508448	2861.69
D9	18	354668	80273.5	82778.4	516814	3518.54
D10	18	280636	65945.2	73226	501950	2298.58
D11	18	227706	56070.9	57763.2	428592	467.073
D12	18	456448	101313	87602	661364	4089.26
E1	18	354241	88988.8	66011.5	504624	2391.95
E2	18	385741	93741.1	71727.1	497004	2600.63
E3	18	418292	94872.8	81147.9	511641	3181.53
E4	18	461588	107411	108989	675377	3655.57
E5	18	382459	89016.8	97469.5	595635	3350.29
E6	18	417810	98879.4	106012	629528	3453.61
E7	18	332211	81904.5	86924.5	514777	2368.55
E8	18	422757	100917	100739	591452	3715.36
E9	18	409191	98161.7	93709.8	569598	3545.64
E10	18	305448	73559.8	73037.4	479585	2197.85
E11	18	238702	58151.3	57513.4	409699	1638.18
E12	18	472980	105718	87996.1	642702	3785.8
F1	18	351542	95126.8	71683.2	536578	2441.05
F2	18	409278	104428	78651.5	548032	2352.32
F3	18	465029	112547	98768.4	624910	3246.77
F4	18	406442	88951.4	90869.1	562042	3601.78
F5	18	443696	95952.3	98435.4	591890	3114.62
F6	18	436587	100868	98837.2	579125	3354.69
F7	18	359416	87455.5	94467.8	562142	3079.29
F8	18	483381	121292	111836	653864	4492.4
F9	18	457757	105575	106894	659800	3912.76
F10	18	350482	81601.6	82866.3	557374	2118.95
F11	18	264013	63238.5	63305.2	458973	139.948
F12	18	464763	101332	89660.7	676567	3979.37
G1	18	334377	87810.1	65302	516013	2629.37
G2	18	431540	110913	82713.5	594417	3121.21
G3	18	521005	124214	109927	739154	3564.69
G4	18	461588	100928	100140	638632	3852.73
G5	18	419687	90252.4	94119.5	585596	3599.91
G6	18	439383	93612.7	95692.2	574594	4049.74
G7	18	374440	86665.2	90006.3	544064	3409.4
G8	18	447832	95906.9	100783	609767	4436.91
G9	18	465270	107708	100433	627324	4081.29
G10	18	344702	94140.9	77385.4	518510	1338.9
G11	18	279538	67895.4	64194.8	462979	1917.09
G12	18	505075	111847	94431.3	722051	3669.47
H1	18	379253	99227.2	66081.1	521281	2567.05
H2	18	403268	99489.5	70911.4	525476	2196.87
H3	18	473751	105732	88178.9	602196	4252.39
H4	18	428597	36685.6	20212.1	16346.3	4390.83
H5	18	436297	36532	20270	16807	4257.52
H6	18	398192	35323	19893.8	15810.9	4174.85
H7	18	386402	85398.5	94746.6	620719	3606.87
H8	18	447360	96167.6	103655	676788	4531.64
H9	18	470633	107026	102736	690542	4316.86
H10	18	332280	26249.2	13520.4	11104.4	3148.84
H11	18	289808	23222.7	11588.7	9195.06	2374.49
H12	18	569130	45053.9	21883.8	17261.8	4582.66
A1	19	239018	62225.9	41296.2	384163	1369.63
A2	19	266774	63071.5	45854.9	385354	1442.88
A3	19	316217	71434.9	54372.1	431308	2433.52
A4	19	319428	68283.5	53849.2	393105	2162.57
A5	19	336554	69194	55750.9	389151	2091.61
A6	19	301012	58192.9	51513.3	356919	2171.4
A7	19	281875	62315.2	57191.1	405721	2310.92
A8	19	325107	67857.3	63474.4	449119	3013.75
A9	19	362844	77079.9	70035.5	506544	3051.87
A10	19	300999	68288.1	63952.3	497502	2714.37
A11	19	235434	56556.1	49311.2	422704	0
A12	19	455457	102169	70909.2	578062	4225.7
B1	19	244653	63436.6	42792.3	366770	1639.88
B2	19	279093	65276.2	51219.3	401755	2413.42
B3	19	305379	68832.4	56352.8	408511	2237.18
B4	19	321881	73568.6	65790.2	466411	9841.3
B5	19	308824	68735.2	63320.1	430004	3433.67
B6	19	288649	62040.9	63979.4	427972	3016.27
B7	19	265560	59710.2	59047.6	397112	2280.11
B8	19	313327	68637.6	67209.1	447946	2980.04
B9	19	321203	68615.7	65272.3	445229	2983.19
B10	19	262543	59374.5	63091.8	465348	2944.35
B11	19	226003	54916	51683	402805	2199.49
B12	19	436192	100205	75247.6	592627	4188.27
C1	19	283487	69689.7	55677.4	446464	3332.52
C2	19	307117	75034.1	58442.2	434338	2542.22
C3	19	341662	79791.4	67199.1	464995	2622.99
C4	19	305077	64430.5	68725.4	470771	3172.49
C5	19	302170	66821.8	70924	469057	2743.38
C6	19	321460	72881.3	77765.8	503127	3308.97
C7	19	270332	53830.8	69698.9	455607	2785.11
C8	19	336295	72119.3	76682.2	484664	2721.64
C9	19	325788	71860.2	74332.1	488584	2288.68
C10	19	248988	53979.8	61362.4	435202	2507.28
C11	19	225541	52518.6	53266.7	399776	2128.26
C12	19	431914	93897.1	77420	590767	4027.8
D1	19	395650	126376	72942.3	547598	3164.85
D2	19	346657	83070.1	65550.9	464217	2013.85
D3	19	380176	90475.2	75794.3	497198	3020.6
D4	19	355477	79284.9	75709.9	479934	3276.78
D5	19	360550	89067.8	91468.7	513097	4001.26
D6	19	363438	81086.8	85261.7	512413	3242.41
D7	19	322423	76407.2	83908.3	507100	2978.61
D8	19	351453	80813.4	84014.8	508375	2864.2
D9	19	354979	80374	82885.7	516461	3376.04
D10	19	281458	66247.9	73330.5	502284	2295.94
D11	19	228366	56174.9	57775.7	428516	811.84
D12	19	455888	101161	87716.5	661874	3960.76
E1	19	354509	89274.4	65862.6	504607	2621.58
E2	19	385780	93985.8	71823.1	496828	3000.29
E3	19	417735	94688.2	81356.6	511162	3100.96
E4	19	461960	107954	109146	676136	3823.88
E5	19	382825	88879.5	97724.8	596476	3017.71
E6	19	418361	98826.9	106072	629910	3673.37
E7	19	333190	82037.7	87074	513683	2374.4
E8	19	423156	100854	101005	591091	3733.67
E9	19	410067	98210.8	93697.1	569721	3514.43
E10	19	305402	73472.2	73007.2	480036	1940.28
E11	19	239043	58431.3	57304.8	408925	1735.97
E12	19	472723	105638	88095.5	641919	3642.04
F1	19	351309	95325.8	71757.3	535975	2418.81
F2	19	409820	104746	78484.1	548241	2635.54
F3	19	465769	112778	98647.1	626279	3218.61
F4	19	406989	89022.4	91127.5	561742	3386.89
F5	19	443616	96045.6	98316.7	592372	3633.37
F6	19	437239	101146	98719.1	578474	3278.19
F7	19	359304	87621.9	94583	561959	3120.41
F8	19	483554	121701	111835	652378	4504.55
F9	19	458585	105821	106934	659310	3799.52
F10	19	351554	82103.7	82970.5	557257	2326.79
F11	19	264391	63228.8	63345.6	459090	511.782
F12	19	464149	101609	89685.6	676924	3945.85
G1	19	332932	88088.4	65492.6	516385	2198.92
G2	19	432018	111037	82746	594319	2758.05
G3	19	521323	123792	109983	739355	3629.09
G4	19	461265	101113	100058	638534	3834.96
G5	19	419761	90565.4	94217.7	585706	3337.01
G6	19	439793	93506	95753.3	575522	3902.53
G7	19	374258	86506	90290.5	543964	3605.56
G8	19	447945	96171.7	100737	610097	4221.19
G9	19	465715	107640	100622	627536	4712.31
G10	19	345892	94670.1	77460.4	518164	1822.3
G11	19	279613	68409.2	64123.8	462967	2202.36
G12	19	505873	112130	94302.1	720675	3680.57
H1	19	380182	99223.4	66132.4	520286	2432.84
H2	19	403262	99787.5	71015	526015	2511.69
H3	19	472757	105897	88189.8	602202	4140.7
H4	19	428233	36767.9	20033.1	16331.1	4555.44
H5	19	436019	36885.6	20439.9	16320.2	4199.61
H6	19	397298	35428.2	19971	16170.8	4224.01
H7	19	386479	85082.5	94824.4	621189	3348.82
H8	19	447712	96140.6	103949	677793	4461.14
H9	19	470855	107063	102827	690715	4381.1
H10	19	331809	26555	13477	10962.7	2787.03
H11	19	290490	23159.8	11539.1	9495.86	2521.99
H12	19	569834	45472	22008.4	18094.8	4924.55
A1	20	238629	62736.3	40787.5	383609	1306.97
A2	20	267683	63089.8	46055	385247	1872.87
A3	20	316937	71492.9	54549.7	430774	2312.88
A4	20	319826	68311.9	53692.7	393069	1994.35
A5	20	337335	69572.8	55727.2	388971	2271.45
A6	20	301255	58547.2	51585	357653	2107.98
A7	20	282268	62736.1	57097.9	405487	2204.75
A8	20	325032	67891.9	63580.4	449027	3065.22
A9	20	363220	77150.3	70165.6	507325	2997.89
A10	20	301183	68428.7	64118.8	497254	2801.93
A11	20	235791	56939	49310.1	423180	0
A12	20	455350	102338	70606.9	577836	4544.9
B1	20	245412	64022.8	43110.2	367065	1738.46
B2	20	280112	65159.3	51209	401851	2321.45
B3	20	306192	68849.6	56356.9	408179	1859.57
B4	20	322455	73725.8	65798.9	465997	9646.4
B5	20	309271	68782.3	63390.2	429910	2996.35
B6	20	288987	62042.5	63829.7	427678	2836.28
B7	20	265588	59782.2	59127.6	397321	2628.77
B8	20	313716	68762.8	67273.5	447631	2710.35
B9	20	321318	68995	65301.1	444911	2962.66
B10	20	262496	59697.5	63100.7	465480	2840.18
B11	20	226339	54774.1	51836.3	402359	1788.95
B12	20	436867	100348	75363	593309	3885.99
C1	20	284148	70077.2	55721.2	446839	3005.54
C2	20	308035	75063.5	58432.7	433927	2185.85
C3	20	342321	80105.1	67125.9	464634	2671.69
C4	20	305309	64412.5	68593.2	470643	3114.87
C5	20	302676	66961.9	71064.4	468945	2872.27
C6	20	322092	72916.2	77875.8	503398	3380.43
C7	20	270438	53630.5	69868.4	455352	2770.34
C8	20	337371	72364.4	76524.9	484455	2975.66
C9	20	326139	71943.6	74433.1	488709	2387.04
C10	20	249217	53912.8	61454.5	436027	2478.59
C11	20	225128	52508.6	53262.7	400174	2444.85
C12	20	432059	94118.2	77509.7	590764	3779.56
D1	20	396522	126630	73171.5	548084	3173.48
D2	20	347042	83144.2	65395.6	464511	2231.23
D3	20	380528	90736.2	75905.6	496646	3136.58
D4	20	356037	79243.2	75560.9	480147	3149.46
D5	20	360612	88990.5	91772.3	513779	3869.09
D6	20	364242	81429.6	85445.2	513135	3097.52
D7	20	322943	76517.3	83960.8	507296	3137.75
D8	20	351665	81146.3	84120.7	508780	3054.86
D9	20	355747	80538.8	83044.1	516715	3136.58
D10	20	281864	66290.2	73375.6	501700	2272.14
D11	20	228586	56349.7	57721.6	429331	737.686
D12	20	457506	101512	87638.5	660063	4168.34
E1	20	354457	89355.1	65808.1	505144	2586.04
E2	20	387058	93677.5	71866.6	497054	2327.36
E3	20	418044	94816.9	81294.5	511830	2851.62
E4	20	462746	108288	109298	675890	3599.47
E5	20	382692	89195	97762.8	596160	2999.4
E6	20	419135	99072.9	106295	629875	3303.2
E7	20	333532	81867.6	87129	514466	2699.38
E8	20	424616	100981	100819	591066	3780.47
E9	20	410735	98114.4	93755.4	569753	3356.52
E10	20	306521	73859.7	73094.2	479535	2225.67
E11	20	239640	58461.4	57622.7	408992	1822.99
E12	20	473125	105298	87933.1	641046	3702.14
F1	20	351544	95620.4	71867.6	536350	2896.34
F2	20	410477	104818	78695.1	548397	2255.19
F3	20	465754	113145	98882.3	626725	3346.89
F4	20	406994	89258	90944.1	562358	3633.66
F5	20	444141	95956.4	98375.5	591924	3214.3
F6	20	438057	101096	98782.1	578337	3381.07
F7	20	360549	87806.6	94324.4	562082	3209.35
F8	20	484903	121587	111958	652869	4510.62
F9	20	459549	105681	106973	659162	3948.35
F10	20	352442	82416.5	83055.6	556846	2337.45
F11	20	265204	63350.4	63261.5	459314	353.446
F12	20	465515	101728	89876.6	676047	4062.74
G1	20	333502	87736	65398.1	515923	2915.34
G2	20	432172	111053	83023	595200	2859.88
G3	20	521208	124468	110055	739841	3536.91
G4	20	462404	101059	100190	637396	3421.36
G5	20	420987	90635	94421.8	585856	3423.36
G6	20	440032	93586.9	95665.7	576574	4193.25
G7	20	375428	86867.7	90225.9	544433	3533.63
G8	20	448663	96115	101020	610848	4571.98
G9	20	466332	108075	100697	627891	4290.28
G10	20	346079	94637.4	77266	518229	1487.31
G11	20	280215	68323.8	64209.5	463076	2351.04
G12	20	506655	112494	94385.6	722462	4116.12
H1	20	379994	98501.9	66159.7	520063	2354.69
H2	20	403494	99623	71040.6	525913	2747.52
H3	20	472194	105578	88068.4	601573	3958.92
H4	20	427041	36699.8	20148.4	16370	4221.52
H5	20	436166	36544	20443.9	16402.6	4871.9
H6	20	397399	35098.6	19873.4	15863.8	4081.9
H7	20	386781	85111.4	94768.7	620724	3636.83
H8	20	447914	96244.7	103655	677221	4571.53
H9	20	471407	106886	102904	690628	4006.37
H10	20	332152	26149.8	13562.7	11249.8	2687.01
H11	20	289804	23494.1	11524.4	9328.75	2451.56
H12	20	569852	45518.9	21922.9	17599.4	4834.21
A1	21	238408	62153.6	40804	383177	1413.34
A2	21	267228	63352.4	45951.1	385542	1894.11
A3	21	317675	71510.5	54490.9	431153	2044.12
A4	21	319907	68349.2	53681.2	392713	2281.36
A5	21	337198	69439.7	55715	388730	2298.18
A6	21	301395	58377.8	51620.1	357262	2315.08
A7	21	282313	62616.6	57128.4	405620	2058.35
A8	21	325165	68098.8	63592	449012	3041.14
A9	21	364044	77486.4	70238.3	506917	3238.88
A10	21	301854	68556.2	64023.1	498196	3004.22
A11	21	235672	56631.2	49280.3	422559	0
A12	21	455874	102146	70640.9	577178	3976.96
B1	21	245209	63920	43069.4	366885	1978.24
B2	21	280027	65319.4	51069.1	402216	2138.61
B3	21	306245	68912.1	56451.4	408548	1807.59
B4	21	322660	73808.2	65840.3	466302	9652.44
B5	21	309418	68766.6	63255.9	430315	3177.52
B6	21	289364	62037.9	64016.2	428020	2887.13
B7	21	266601	59901.4	59142.6	397200	2377.21
B8	21	314167	68815.2	67297	447658	2605.34
B9	21	321673	68808.6	65439.2	445707	2892.84
B10	21	262764	59569.2	63037.3	465948	2921.9
B11	21	226284	55035.9	51628.8	403071	1982.93
B12	21	437025	100268	75234.1	593193	3847.93
C1	21	283487	69697.4	55674.9	446411	3065.77
C2	21	308411	75185.6	58381.3	433402	2641.67
C3	21	342510	79798.9	67335.2	464726	2774.7
C4	21	305389	64458.8	68679.7	470475	2690.95
C5	21	302748	67286.3	71230.7	469522	2829.31
C6	21	321983	72963.6	78062	503140	3105.82
C7	21	270500	53534.9	69960.7	455173	2901.63
C8	21	337231	72366	76754.8	484517	2973.18
C9	21	326451	72189.6	74321.5	488569	2562.26
C10	21	249354	53963.7	61414.1	436086	2277.77
C11	21	225509	52412.2	53091.5	400229	1832.1
C12	21	432302	93739.7	77482	590994	3696.08
D1	21	397002	127933	73172.6	548673	3066.26
D2	21	346941	83059.8	65383.4	464238	2230.23
D3	21	380200	90577	75944.7	496801	3176.26
D4	21	356223	79337.6	75967.3	480197	2958.97
D5	21	360736	89277.5	91871.5	513137	3964.94
D6	21	363896	81529.2	85528	513373	3050.5
D7	21	322890	76590.5	84062.8	506936	2902.96
D8	21	352287	81373.1	83963.9	508999	2794.79
D9	21	355904	80637.7	83011.4	516797	3521.07
D10	21	281809	65985.8	73578.3	502602	2393.77
D11	21	229030	56332	57748.7	429178	986.15
D12	21	456820	101350	87659.8	661617	4156.47
E1	21	354484	89275.8	65913.1	504675	2774.66
E2	21	387014	94029.3	71976	497028	3077.72
E3	21	418291	94731.4	81272.1	511792	3035.63
E4	21	462788	108164	109252	675812	3637.62
E5	21	383077	89292.3	97761.8	595510	2934.3
E6	21	419538	99195.5	106204	629620	3854.06
E7	21	333303	82200.1	87241.1	514140	2583.25
E8	21	424252	101129	101191	591487	3643.13
E9	21	411117	98623.9	93900.4	569384	3396
E10	21	306584	73624.4	73200.6	479632	2241.83
E11	21	239902	58293.2	57436	408848	1531.42
E12	21	472921	105399	87922.3	641469	3895.46
F1	21	350417	95258.9	71950.8	536031	2709.48
F2	21	410550	104922	78625.6	548430	2294.98
F3	21	466651	112826	98874.8	625702	3513.77
F4	21	406799	88919.9	90931.9	561816	3252.2
F5	21	443894	96090.2	98437.5	591860	3480.1
F6	21	437552	101002	98756.7	578341	3574.53
F7	21	360008	87749	94528.2	561883	3109.89
F8	21	484789	121926	112022	651828	4420.55
F9	21	459602	105648	107147	659955	3666.87
F10	21	352219	82456.9	82923.7	557537	2418.46
F11	21	265112	63417.1	63407.9	459569	863.184
F12	21	465052	101697	89623.4	676062	3854.75
G1	21	334271	88300.9	65611.9	516447	2870.19
[truncated: 10,967 more rows]

## Sheet: Multicomponent Data
Block Type	96alum
Chemistry	SYBR_GREEN
Experiment File Name	D:\HAIFENG\Untitled.eds
Experiment Run End Time	2021-08-29 11:47:26 AM CST
Instrument Type	sds7500
Passive Reference	ROX
Well	Cycle	SYBR	ROX
A1	1	247074	400976
A2	1	262161	391271
A3	1	307436	431414
A4	1	312391	393298
A5	1	328556	391151
A6	1	293009	356265
A7	1	270390	408481
A8	1	316664	453303
A9	1	351698	507060
A10	1	292772	499062
A11	1	232112	428013
A12	1	451349	590970
B1	1	245643	375002
B2	1	275371	402938
B3	1	295543	404417
B4	1	315179	461094
B5	1	298929	428773
B6	1	280747	425819
B7	1	252308	393325
B8	1	301899	449103
B9	1	309330	444181
B10	1	258687	469126
B11	1	221883	404782
B12	1	430375	599998
C1	1	292766	454917
C2	1	301347	435711
C3	1	329890	460834
C4	1	296605	464058
C5	1	290728	466319
C6	1	310290	498888
C7	1	263995	453651
C8	1	325594	484710
C9	1	311916	486795
C10	1	243046	432503
C11	1	219831	398181
C12	1	430649	597959
D1	1	369935	552491
D2	1	341360	465022
D3	1	371048	492013
D4	1	343192	474332
D5	1	350890	508760
D6	1	352160	507841
D7	1	304511	504720
D8	1	336324	506169
D9	1	339094	513065
D10	1	270647	497199
D11	1	220743	426049
D12	1	446440	662964
E1	1	350991	505739
E2	1	376501	493181
E3	1	406706	505792
E4	1	445897	670555
E5	1	368556	592051
E6	1	402255	626732
E7	1	316038	513769
E8	1	403572	587221
E9	1	391845	568383
E10	1	291703	479781
E11	1	231162	409275
E12	1	473348	650734
F1	1	352668	543921
F2	1	396841	544008
F3	1	454297	620488
F4	1	403353	560587
F5	1	434731	592806
F6	1	425674	579903
F7	1	348779	564483
F8	1	469367	649516
F9	1	439963	657727
F10	1	333926	554469
F11	1	252018	457751
F12	1	458107	682644
G1	1	339415	525722
G2	1	415441	586209
G3	1	510775	732308
G4	1	454325	637020
G5	1	408726	583514
G6	1	427454	571691
G7	1	362519	545145
G8	1	433285	608457
G9	1	446308	625238
G10	1	332985	518882
G11	1	269946	461417
G12	1	504208	737005
H1	1	382501	534379
H2	1	397287	530583
H3	1	475092	611032
H4	1
H5	1
H6	1
H7	1	383295	633770
H8	1	439721	685059
H9	1	459385	696151
H10	1
H11	1
H12	1
A1	2	244688	400251
A2	2	261907	389902
A3	2	307876	430601
A4	2	312491	393085
A5	2	329854	390314
A6	2	293387	356173
A7	2	271434	407128
A8	2	317298	452167
A9	2	352435	505812
A10	2	293356	497747
A11	2	230826	425365
A12	2	451625	592763
B1	2	244860	374167
B2	2	275991	403346
B3	2	296770	405603
B4	2	315698	461818
B5	2	300457	429529
B6	2	282458	426697
B7	2	254734	393918
B8	2	303670	448607
B9	2	310999	444229
B10	2	259584	468408
B11	2	220975	403031
B12	2	431197	598842
C1	2	291787	454406
C2	2	302413	436417
C3	2	331192	462998
C4	2	297892	466140
C5	2	293029	467511
C6	2	312390	500554
C7	2	264882	454858
C8	2	327471	484668
C9	2	314714	487212
C10	2	243778	432306
C11	2	220337	398257
C12	2	429782	597008
D1	2	369300	552036
D2	2	341046	465586
D3	2	372938	493718
D4	2	344979	475856
D5	2	352811	509189
D6	2	354106	508613
D7	2	307815	505532
D8	2	338545	506239
D9	2	341877	514097
D10	2	272270	498057
D11	2	221028	425949
D12	2	447581	663250
E1	2	351930	507334
E2	2	378472	495121
E3	2	409586	506862
E4	2	448125	672930
E5	2	371855	593808
E6	2	404755	627748
E7	2	318841	514108
E8	2	407754	587758
E9	2	393895	568516
E10	2	292941	479914
E11	2	232293	409545
E12	2	471106	649861
F1	2	352174	543928
F2	2	398508	545384
F3	2	456171	622197
F4	2	404495	561533
F5	2	437653	593441
F6	2	426927	580041
F7	2	350762	564992
F8	2	473156	651943
F9	2	443631	658306
F10	2	335981	555340
F11	2	252943	457053
F12	2	458685	683384
G1	2	338178	525904
G2	2	417847	588528
G3	2	511622	734496
G4	2	456152	639957
G5	2	410256	584490
G6	2	429758	572512
G7	2	364799	545643
G8	2	436246	609351
G9	2	449610	626244
G10	2	335895	518161
G11	2	271808	461391
G12	2	503712	737040
H1	2	383465	534543
H2	2	398316	531849
H3	2	474535	610014
H4	2
H5	2
H6	2
H7	2	384792	632078
H8	2	441746	684384
H9	2	461979	695104
H10	2
H11	2
H12	2
A1	3	242701	397091
A2	3	262202	389331
A3	3	307974	430422
A4	3	312841	392668
A5	3	330326	389771
A6	3	294054	356152
A7	3	272042	406227
A8	3	318715	450998
A9	3	353255	506114
A10	3	293487	496526
A11	3	229929	423022
A12	3	452348	591863
B1	3	242774	370804
B2	3	275922	403829
B3	3	297507	406634
B4	3	316399	463202
B5	3	301991	429360
B6	3	283038	427093
B7	3	256252	394089
B8	3	304653	448129
B9	3	311537	444015
B10	3	258245	466148
B11	3	221315	401977
B12	3	430400	596901
C1	3	289362	450842
C2	3	302587	436758
C3	3	333254	464273
C4	3	298860	466958
C5	3	294529	468342
C6	3	314088	501151
C7	3	266167	455943
C8	3	328574	485252
C9	3	316102	487820
C10	3	244768	433099
C11	3	220792	397985
C12	3	429536	594349
D1	3	368190	549066
D2	3	342583	465879
D3	3	373800	495705
D4	3	346419	477246
D5	3	354015	510309
D6	3	355342	509701
D7	3	309910	506750
D8	3	340400	507041
D9	3	344469	514748
D10	3	272908	498959
D11	3	221594	426728
D12	3	448385	661812
E1	3	351516	506284
E2	3	379577	495714
E3	3	410844	508566
E4	3	450151	673916
E5	3	373342	594682
E6	3	406193	628644
E7	3	320619	514453
E8	3	409737	589245
E9	3	396562	569058
E10	3	294511	480329
E11	3	232630	409745
E12	3	470662	647963
F1	3	350830	540931
F2	3	400080	547067
F3	3	457243	623524
F4	3	405211	562758
F5	3	438700	594457
F6	3	427554	582014
F7	3	352588	565262
F8	3	475195	652514
F9	3	446155	659495
F10	3	338434	556136
F11	3	254479	457986
F12	3	459913	681805
G1	3	335501	522423
G2	3	419553	591342
G3	3	513469	735353
G4	3	457782	641242
G5	3	411663	586192
G6	3	431214	574084
G7	3	366602	546156
G8	3	438117	609553
G9	3	451487	627188
G10	3	337292	518906
G11	3	273377	461782
G12	3	501072	734540
H1	3	382584	532489
H2	3	398313	530302
H3	3	473744	608252
H4	3
H5	3
H6	3
H7	3	385150	630032
H8	3	441274	682046
H9	3	462762	694844
H10	3
H11	3
H12	3
A1	4	242673	395391
A2	4	262899	388111
A3	4	309063	430491
A4	4	312780	392719
A5	4	331310	389549
A6	4	294937	356316
A7	4	273303	405887
A8	4	318855	450838
A9	4	354520	505849
A10	4	294494	496888
A11	4	231384	423118
A12	4	453567	590287
B1	4	242387	369907
B2	4	276640	403816
B3	4	298981	406914
B4	4	317638	463655
B5	4	303441	430514
B6	4	284402	427699
B7	4	257686	394818
B8	4	306129	448499
B9	4	313340	444436
B10	4	259152	465433
B11	4	222476	402285
B12	4	430377	595684
C1	4	289003	450813
C2	4	303813	437099
C3	4	334843	465190
C4	4	299822	467883
C5	4	296133	468795
C6	4	315314	501804
C7	4	267468	456064
C8	4	329463	485427
C9	4	317956	488569
C10	4	245568	433430
C11	4	222172	398496
C12	4	428984	593403
D1	4	368597	548873
D2	4	343149	466743
D3	4	375770	497084
D4	4	347874	477945
D5	4	355950	511564
D6	4	356912	510672
D7	4	311892	507179
D8	4	342142	507793
D9	4	346056	516529
D10	4	274686	499532
D11	4	223308	427595
D12	4	449589	661302
E1	4	351697	505414
E2	4	380893	496037
E3	4	413131	510321
E4	4	451790	675601
E5	4	374980	596199
E6	4	408341	629110
E7	4	322736	514994
E8	4	412682	590049
E9	4	398345	569697
E10	4	296218	480525
E11	4	234106	410395
E12	4	470788	646213
F1	4	350790	540165
F2	4	402084	547484
F3	4	458172	625361
F4	4	406238	563536
F5	4	440290	595572
F6	4	429251	582441
F7	4	353753	566233
F8	4	476983	652340
F9	4	448277	660111
F10	4	340198	556772
F11	4	256508	458948
F12	4	460919	680253
G1	4	335365	520607
G2	4	422174	591482
G3	4	514956	737007
G4	4	458654	640799
G5	4	413209	586196
G6	4	433032	576002
G7	4	368532	546820
G8	4	439637	611289
G9	4	454150	627825
G10	4	338540	519431
G11	4	273749	462266
G12	4	500567	731426
H1	4	383380	530914
H2	4	400201	529583
H3	4	474250	606416
H4	4
H5	4
H6	4
H7	4	386261	628172
H8	4	442665	680974
H9	4	464022	692915
H10	4
H11	4
H12	4
A1	5	242537	394549
A2	5	262903	388000
A3	5	310047	430431
A4	5	314259	392117
A5	5	332666	389883
A6	5	295859	356110
A7	5	273932	405461
A8	5	320215	450567
A9	5	355787	506601
A10	5	295220	497619
A11	5	231239	422747
A12	5	454057	589390
B1	5	243331	369491
B2	5	277205	404251
B3	5	300220	407689
B4	5	318518	464554
B5	5	304684	430266
B6	5	285240	428052
B7	5	258942	395108
B8	5	306836	448811
B9	5	314674	444953
B10	5	259723	466167
B11	5	223036	402617
B12	5	432116	595166
C1	5	289736	449962
C2	5	305687	436921
C3	5	336271	465701
C4	5	300832	469211
C5	5	297208	468875
C6	5	316757	502431
C7	5	268399	456568
C8	5	331231	485952
C9	5	319560	488726
C10	5	246646	434201
C11	5	222980	398803
C12	5	430414	593338
D1	5	385452	548768
D2	5	344043	466716
D3	5	376911	497478
D4	5	349364	478526
D5	5	356665	512130
D6	5	357847	511883
D7	5	313059	508120
D8	5	343552	508539
D9	5	347583	516917
D10	5	275192	500106
D11	5	223687	428255
D12	5	451291	661659
E1	5	353455	505744
E2	5	382592	496911
E3	5	414009	510597
E4	5	453395	677312
E5	5	376992	596644
E6	5	409398	629416
E7	5	324385	515106
E8	5	414266	591117
E9	5	400396	570191
E10	5	296886	481575
E11	5	235095	410396
E12	5	470783	647486
F1	5	351401	538805
F2	5	403595	548920
F3	5	459339	625596
F4	5	406910	564066
F5	5	440824	595911
F6	5	430948	583375
F7	5	354888	566195
F8	5	478518	653525
F9	5	450262	660118
F10	5	342384	557671
F11	5	257164	459501
F12	5	461374	680325
G1	5	334998	519926
G2	5	424591	592242
G3	5	517069	738642
G4	5	459570	640778
G5	5	414446	587131
G6	5	434056	578142
G7	5	368943	547117
G8	5	441342	611960
G9	5	455259	628508
G10	5	340108	519375
G11	5	275279	462525
G12	5	500885	729227
H1	5	382903	529902
H2	5	400567	528026
H3	5	474691	605886
H4	5
H5	5
H6	5
H7	5	386950	627565
H8	5	443790	680193
H9	5	466108	693219
H10	5
H11	5
H12	5
A1	6	242041	393023
A2	6	263240	387957
A3	6	310970	431297
A4	6	315395	392183
A5	6	333949	390080
A6	6	297393	357013
A7	6	275803	405894
A8	6	321516	450744
A9	6	357551	506772
A10	6	296184	497383
A11	6	232042	422671
A12	6	454170	588385
B1	6	244050	369374
B2	6	278126	404019
B3	6	301341	407654
B4	6	319385	464782
B5	6	306040	430224
B6	6	286491	427957
B7	6	260139	395425
B8	6	308597	448822
B9	6	316206	445265
B10	6	260633	466153
B11	6	223480	403009
B12	6	432812	594424
C1	6	289399	449399
C2	6	306135	437415
C3	6	337145	465975
C4	6	301891	469342
C5	6	298184	469300
C6	6	317873	502562
C7	6	268863	456520
C8	6	332015	486112
C9	6	320675	489528
C10	6	247212	435323
C11	6	223801	399508
C12	6	431073	592435
D1	6	386580	548802
D2	6	344672	467219
D3	6	377960	497789
D4	6	350615	479534
D5	6	358261	512592
D6	6	359127	511948
D7	6	314660	507642
D8	6	345032	508956
D9	6	348355	517031
D10	6	276774	500914
D11	6	225369	428854
D12	6	452194	661064
E1	6	353976	505842
E2	6	384176	497655
E3	6	415909	511629
E4	6	455486	676696
E5	6	378061	597558
E6	6	411282	631922
E7	6	325924	515632
E8	6	415695	591196
E9	6	402782	570515
E10	6	298750	481857
E11	6	236106	410721
E12	6	471751	646070
F1	6	352373	539034
F2	6	405884	548661
F3	6	461301	628843
F4	6	407970	564019
F5	6	441986	595710
F6	6	432576	583198
F7	6	355851	566390
F8	6	479723	654350
F9	6	451922	661124
F10	6	344496	557911
F11	6	257940	459724
F12	6	463038	679372
G1	6	335301	518593
G2	6	425812	593379
G3	6	518527	738438
G4	6	460817	642276
G5	6	416040	587527
G6	6	435522	577856
G7	6	370575	547063
G8	6	442882	612286
G9	6	458339	628961
G10	6	341403	519730
G11	6	276345	462701
G12	6	500453	728732
H1	6	383171	529018
H2	6	401578	528204
H3	6	475418	604893
H4	6
H5	6
H6	6
H7	6	387360	625188
H8	6	444698	680095
H9	6	467364	693139
H10	6
H11	6
H12	6
A1	7	242331	392354
A2	7	264665	387843
A3	7	312172	430887
A4	7	316619	392405
A5	7	334641	389713
A6	7	298043	356733
A7	7	276263	405733
A8	7	322135	450400
A9	7	358091	506784
A10	7	296985	497606
A11	7	232775	422921
A12	7	455265	588219
B1	7	244496	369138
B2	7	279122	404047
B3	7	302655	408422
B4	7	321178	465616
B5	7	307179	430745
B6	7	286944	429008
B7	7	261221	396413
B8	7	308753	448974
B9	7	317558	445441
B10	7	261067	466202
B11	7	223786	403197
B12	7	433591	594092
C1	7	289137	449068
C2	7	306856	437651
C3	7	338930	465958
C4	7	302550	469366
C5	7	298843	469650
C6	7	318529	502749
C7	7	269888	456973
C8	7	333231	486336
C9	7	321841	489685
C10	7	248454	435375
C11	7	224217	400471
C12	7	432217	593100
D1	7	388834	549042
D2	7	345690	467239
D3	7	379244	497922
D4	7	351426	479657
D5	7	359392	513589
D6	7	360749	512843
D7	7	316069	508119
D8	7	346064	509118
D9	7	350242	517816
D10	7	277885	501216
D11	7	225347	428838
D12	7	454019	661519
E1	7	355012	505692
E2	7	385355	497760
E3	7	416611	511760
E4	7	456322	677793
E5	7	379272	597777
E6	7	412284	631727
E7	7	327202	515574
E8	7	417200	591869
E9	7	404077	571344
E10	7	299529	481965
E11	7	237018	410956
E12	7	472859	645051
F1	7	352577	538995
F2	7	406683	549605
F3	7	462089	628974
F4	7	407554	563961
F5	7	442546	595888
F6	7	433441	582778
F7	7	356974	566344
F8	7	480802	655233
F9	7	453867	662035
F10	7	345366	559068
F11	7	259394	460560
F12	7	462949	679951
G1	7	335971	519103
G2	7	427828	594396
G3	7	519119	739912
G4	7	460778	642389
G5	7	416854	587557
G6	7	437146	578485
G7	7	371255	547166
G8	7	443884	613225
G9	7	459716	628757
G10	7	342395	520192
G11	7	277203	463343
G12	7	501933	727272
H1	7	383945	528702
H2	7	402865	528229
H3	7	475602	604904
H4	7
H5	7
H6	7
H7	7	387522	625416
H8	7	445599	680365
H9	7	468726	693047
H10	7
H11	7
H12	7
A1	8	243051	391415
A2	8	264893	386920
A3	8	312598	431532
A4	8	317408	392696
A5	8	336014	389866
A6	8	298400	356904
A7	8	277802	405749
A8	8	322948	450666
A9	8	359602	507112
A10	8	297817	497681
A11	8	233107	422862
A12	8	455461	586657
B1	8	244618	369113
B2	8	279643	404092
B3	8	303544	408890
B4	8	321187	465736
B5	8	307246	430589
B6	8	287923	428863
B7	8	262092	396437
B8	8	309955	449607
B9	8	318232	445533
B10	8	261665	466443
B11	8	225305	402518
B12	8	434470	594306
C1	8	289027	449502
C2	8	307889	437036
C3	8	339571	466012
C4	8	303300	470308
C5	8	299803	469668
C6	8	319138	502931
C7	8	270144	456807
C8	8	334317	486192
C9	8	322845	489885
C10	8	249029	435919
C11	8	225345	400081
C12	8	432648	593183
D1	8	390770	549452
D2	8	346587	467330
D3	8	380400	498645
D4	8	352439	480160
D5	8	359946	513724
D6	8	361673	512697
D7	8	316728	507802
D8	8	347031	509489
D9	8	351416	518102
D10	8	278628	502111
D11	8	226510	429276
D12	8	454698	660127
E1	8	356227	505155
E2	8	386637	498628
E3	8	418159	512228
E4	8	457566	678149
E5	8	380136	597736
E6	8	414525	632187
E7	8	327866	516458
E8	8	418339	592687
E9	8	405837	571323
E10	8	300908	482180
E11	8	238177	411354
E12	8	473254	645860
F1	8	353367	538496
F2	8	407707	550271
F3	8	463885	628634
F4	8	408285	564779
F5	8	443735	595621
F6	8	434709	582509
F7	8	357760	566256
F8	8	482739	655474
F9	8	455076	662202
F10	8	347077	558799
F11	8	260130	460418
F12	8	463955	679440
G1	8	335996	518404
G2	8	429306	594222
G3	8	520482	740334
G4	8	461734	641754
G5	8	417080	587663
G6	8	437874	578846
G7	8	372631	547352
G8	8	444886	613449
G9	8	461329	628965
G10	8	343659	520720
G11	8	277953	463683
G12	8	501565	726060
H1	8	384132	527796
H2	8	404038	527715
H3	8	476025	604945
H4	8
H5	8
H6	8
H7	8	388373	625347
H8	8	445975	680448
H9	8	469823	693645
H10	8
H11	8
H12	8
A1	9	242224	389975
A2	9	266039	386900
A3	9	314035	430672
A4	9	317996	392838
A5	9	336694	389987
A6	9	299469	357574
A7	9	278516	406094
A8	9	323683	450357
A9	9	361073	507124
A10	9	299194	498078
A11	9	234244	422752
A12	9	457041	586029
B1	9	245571	368286
B2	9	280603	404130
B3	9	304295	408323
B4	9	322086	465864
B5	9	308220	430769
B6	9	288805	428653
B7	9	263086	396650
B8	9	311098	448880
B9	9	319171	445886
B10	9	262782	466159
B11	9	225613	402748
B12	9	435426	594559
C1	9	289454	449478
C2	9	308722	436740
C3	9	340320	466853
C4	9	304167	470125
C5	9	300832	469625
C6	9	320247	503131
C7	9	270402	456569
C8	9	335163	486081
C9	9	324055	489928
C10	9	248912	435999
C11	9	225755	400122
C12	9	432898	592666
D1	9	392998	549205
D2	9	347517	467354
D3	9	381298	498369
D4	9	353434	480351
D5	9	361163	514042
D6	9	362506	513119
D7	9	318088	508007
D8	9	348639	509721
D9	9	352507	518640
D10	9	279712	502070
D11	9	227337	429677
D12	9	455350	661783
E1	9	356373	505692
E2	9	387600	498195
E3	9	418699	513129
E4	9	458061	678411
E5	9	381158	597811
E6	9	415942	633287
E7	9	329111	516432
E8	9	419545	592129
E9	9	407202	571368
E10	9	302193	482352
E11	9	238532	410682
E12	9	474028	645838
F1	9	354007	538139
F2	9	409510	550329
F3	9	465192	629514
F4	9	408560	564727
F5	9	443958	595537
F6	9	435882	583048
F7	9	358863	565924
F8	9	484345	655306
F9	9	456791	662737
F10	9	347988	558809
F11	9	260838	460120
F12	9	464737	680038
G1	9	336875	518020
G2	9	430755	594810
G3	9	522268	740566
G4	9	462711	641593
G5	9	418597	588093
G6	9	439557	578361
G7	9	373091	546910
G8	9	446550	612700
G9	9	463612	629452
G10	9	344749	520726
G11	9	279303	464204
G12	9	502711	724811
H1	9	385407	526626
H2	9	405136	527247
H3	9	476990	605460
H4	9
H5	9
H6	9
H7	9	388757	624862
H8	9	447365	679508
H9	9	471388	691732
H10	9
H11	9
H12	9
A1	10	242848	390237
A2	10	266149	387123
A3	10	315197	431582
A4	10	319125	392833
A5	10	336861	390061
A6	10	300167	357559
A7	10	279739	406063
A8	10	324024	450278
A9	10	362015	507220
A10	10	299786	497685
A11	10	234760	422747
A12	10	457051	585225
B1	10	245779	368504
B2	10	280813	403849
B3	10	304840	408016
B4	10	323298	466098
B5	10	309284	430551
B6	10	289229	428996
B7	10	264089	396520
B8	10	311593	449417
B9	10	320573	445926
B10	10	262852	466344
B11	10	226506	403330
B12	10	436355	593634
C1	10	289314	448963
C2	10	309063	437040
C3	10	341014	466508
C4	10	304799	470782
C5	10	301718	470034
C6	10	321095	502933
C7	10	270993	456491
C8	10	335864	486072
C9	10	324658	489881
C10	10	249963	436176
C11	10	225907	400833
C12	10	433600	592524
D1	10	394672	549036
D2	10	347911	467153
D3	10	381707	498521
D4	10	354152	480348
D5	10	362259	514237
D6	10	363544	513425
D7	10	319028	508550
D8	10	349187	509589
D9	10	353963	517966
D10	10	280822	502262
D11	10	228040	429590
D12	10	456746	662302
E1	10	357129	506173
E2	10	388029	498680
E3	10	418983	512777
E4	10	460532	678756
E5	10	382017	598143
E6	10	417277	631694
E7	10	330521	515926
E8	10	420862	593156
E9	10	408767	571927
E10	10	302480	482376
E11	10	239212	411264
E12	10	475156	645160
F1	10	354915	538235
F2	10	410482	550309
F3	10	465553	629053
F4	10	409394	565329
F5	10	445461	595595
F6	10	437500	583029
F7	10	359620	566245
F8	10	484941	655880
F9	10	458029	662743
F10	10	349707	559644
F11	10	262108	460499
F12	10	465033	678393
G1	10	337655	518131
G2	10	432865	595228
G3	10	522332	740831
G4	10	463213	643025
G5	10	419300	588467
G6	10	440645	577686
G7	10	374336	546775
G8	10	446894	611796
G9	10	464914	629581
G10	10	346264	520721
G11	10	279973	464064
G12	10	504242	725249
H1	10	384489	526029
H2	10	405818	526884
H3	10	477734	604884
H4	10
H5	10
H6	10
H7	10	389589	624711
H8	10	448534	679568
H9	10	471752	692729
H10	10
H11	10
H12	10
A1	11	242764	389531
A2	11	266235	387110
A3	11	315351	431365
A4	11	319900	392922
A5	11	337237	390151
A6	11	300869	357328
A7	11	280194	405473
A8	11	325002	449975
A9	11	362246	507214
A10	11	300471	498248
A11	11	235872	422344
A12	11	457949	583495
B1	11	245891	368747
B2	11	281692	404324
B3	11	306076	408494
B4	11	323492	466107
B5	11	309627	430818
B6	11	289477	428256
B7	11	264450	396491
B8	11	312170	448906
B9	11	321233	446186
B10	11	263478	466164
B11	11	226974	403603
B12	11	437210	594058
C1	11	289837	448927
C2	11	309548	436586
C3	11	342105	466695
C4	11	305370	469947
C5	11	302507	469978
C6	11	321498	503511
C7	11	271753	456563
C8	11	336883	486225
C9	11	325375	489783
C10	11	250233	436226
C11	11	226526	400558
C12	11	434533	591647
D1	11	395426	549123
D2	11	348585	466947
D3	11	382475	498200
D4	11	355365	480566
D5	11	362971	514323
D6	11	364047	513808
D7	11	320032	508362
D8	11	350224	509702
D9	11	354331	518227
D10	11	281127	502546
D11	11	228785	429509
D12	11	457487	662161
E1	11	358003	505692
E2	11	388750	498373
E3	11	419933	512916
E4	11	461724	679140
E5	11	383734	598843
E6	11	417973	632607
E7	11	331179	516234
E8	11	421544	592785
E9	11	409867	571658
E10	11	303687	481832
E11	11	239840	410960
E12	11	475186	645065
F1	11	355335	538182
F2	11	410773	550232
F3	11	467592	629567
F4	11	410000	565139
F5	11	446497	595648
F6	11	438375	582924
F7	11	360200	565881
F8	11	486179	655673
F9	11	459049	662817
F10	11	350250	559216
F11	11	262597	460319
F12	11	465936	679630
G1	11	337735	516676
G2	11	433523	594712
G3	11	524550	740935
G4	11	463858	641788
G5	11	420681	588115
G6	11	441211	577486
G7	11	375136	547116
G8	11	447718	613133
G9	11	465550	630001
G10	11	347030	520476
G11	11	280143	464431
G12	11	505281	724006
H1	11	385558	524944
H2	11	406538	527044
H3	11	477124	604398
H4	11
H5	11
H6	11
H7	11	390057	623291
H8	11	448896	679435
H9	11	472809	692372
H10	11
H11	11
H12	11
A1	12	242589	388131
A2	12	267006	386877
A3	12	316974	431210
A4	12	320191	393091
A5	12	337852	389806
A6	12	301160	357646
A7	12	280707	406103
A8	12	325421	450654
A9	12	363259	507021
A10	12	301159	498437
A11	12	235882	423030
A12	12	458376	583954
B1	12	246261	368666
B2	12	281426	403620
B3	12	305949	408599
B4	12	323919	466521
B5	12	310569	430464
B6	12	289932	428731
B7	12	265161	396646
B8	12	313343	448654
B9	12	321689	446095
B10	12	263793	466252
B11	12	226979	403487
B12	12	438476	594114
C1	12	289454	448310
C2	12	309793	436836
C3	12	342674	466163
C4	12	305818	471210
C5	12	302921	470345
C6	12	322340	503631
C7	12	271646	456462
C8	12	337039	486106
C9	12	326534	490358
C10	12	250274	436141
C11	12	226842	401309
C12	12	434860	593103
D1	12	397633	549316
D2	12	349598	466653
D3	12	383477	498627
D4	12	355609	480856
D5	12	363513	514694
D6	12	364671	513740
D7	12	320581	508335
D8	12	350758	509734
D9	12	355030	518700
D10	12	282030	502346
D11	12	228814	430088
D12	12	458064	662217
E1	12	357796	505793
E2	12	389463	498888
E3	12	420603	513026
E4	12	462364	678615
E5	12	384088	598453
E6	12	418563	632890
E7	12	332453	516469
E8	12	422695	593265
E9	12	410662	571891
E10	12	304179	482184
E11	12	240122	411556
E12	12	476029	644607
F1	12	355540	538377
F2	12	411383	549580
F3	12	468217	628526
F4	12	410187	564909
F5	12	446319	595506
F6	12	438459	581623
F7	12	360651	565756
F8	12	486665	656289
F9	12	459900	662578
F10	12	351203	559245
F11	12	263131	460631
F12	12	466366	678888
G1	12	338145	517297
G2	12	433742	595107
G3	12	525016	740854
G4	12	464232	642756
G5	12	420873	587745
G6	12	441572	578597
G7	12	375668	546640
G8	12	448490	613901
G9	12	466633	629298
G10	12	347478	520975
G11	12	281260	463907
G12	12	505608	722953
H1	12	384767	525440
H2	12	406862	527225
H3	12	477891	604012
H4	12
H5	12
H6	12
H7	12	390135	625382
H8	12	449701	680501
H9	12	473341	692588
H10	12
H11	12
H12	12
A1	13	242914	387628
A2	13	267242	386060
A3	13	317325	431521
A4	13	320808	393148
A5	13	338428	389925
A6	13	301172	356959
A7	13	281992	405656
A8	13	326456	450126
A9	13	364068	507375
A10	13	301706	497742
A11	13	235973	423030
A12	13	458484	582222
B1	13	246322	368054
B2	13	281910	403564
B3	13	306482	409197
B4	13	324275	466419
B5	13	310719	430560
B6	13	290703	428538
B7	13	265814	396700
B8	13	313109	449092
B9	13	322208	446047
B10	13	264231	465950
B11	13	227632	402965
B12	13	438884	594315
C1	13	289648	448416
C2	13	310514	436474
C3	13	343373	466072
C4	13	306243	470645
C5	13	303435	469809
C6	13	323059	503857
C7	13	271611	456323
C8	13	338258	485838
C9	13	326959	490111
C10	13	250874	435942
C11	13	226708	400645
C12	13	435189	591936
D1	13	398563	549532
D2	13	350098	466807
D3	13	382829	498806
D4	13	356590	480916
D5	13	363839	514798
D6	13	365359	513444
D7	13	321300	508689
D8	13	352442	510107
D9	13	356529	518647
D10	13	282254	502736
D11	13	229441	429536
D12	13	459496	662430
E1	13	358854	505216
E2	13	390457	497861
E3	13	420866	512767
E4	13	462379	678405
E5	13	384166	597648
E6	13	419637	631845
E7	13	333151	515789
E8	13	423511	593629
E9	13	411742	572070
E10	13	304914	482142
E11	13	240805	411068
E12	13	477351	644145
F1	13	355609	538043
F2	13	412882	549740
F3	13	468527	628839
F4	13	410850	564211
F5	13	446929	594899
F6	13	439248	581897
F7	13	361814	565335
F8	13	487174	656254
F9	13	460493	662127
F10	13	351764	559531
F11	13	263009	460394
F12	13	467086	678382
G1	13	338802	517467
G2	13	434564	595868
G3	13	525267	741589
G4	13	465399	640574
G5	13	422155	588139
G6	13	442450	577971
G7	13	375920	546842
G8	13	449696	611644
G9	13	467177	629265
G10	13	347626	520099
G11	13	281389	464134
G12	13	506296	726118
H1	13	386013	525186
H2	13	407407	527250
H3	13	478122	604926
H4	13
H5	13
H6	13
H7	13	390349	622975
H8	13	449892	679283
H9	13	474009	691650
H10	13
H11	13
H12	13
A1	14	243329	386746
A2	14	267883	386767
A3	14	317866	431800
A4	14	321274	393639
A5	14	338612	390177
A6	14	302001	357521
A7	14	282391	405876
A8	14	326538	449839
A9	14	364804	507142
A10	14	302178	498200
A11	14	237242	422773
A12	14	459582	582078
B1	14	247472	367863
B2	14	281815	403712
B3	14	306985	408952
B4	14	324898	466800
B5	14	311219	430830
B6	14	290503	428681
B7	14	266299	397141
B8	14	313839	448922
B9	14	322733	446214
B10	14	264125	466024
B11	14	227976	403238
B12	14	439266	594320
C1	14	288789	448231
C2	14	310989	436966
C3	14	343689	466638
C4	14	306616	470697
C5	14	304167	469790
C6	14	323388	504334
C7	14	272322	456466
C8	14	338404	486524
C9	14	326923	489959
C10	14	250763	436017
C11	14	227345	400684
C12	14	434754	591707
D1	14	400333	549442
D2	14	349826	466014
D3	14	384363	499045
D4	14	357485	480806
D5	14	364814	514775
D6	14	366361	514423
D7	14	322181	508386
D8	14	352497	509798
D9	14	356959	518684
D10	14	283088	503154
D11	14	230075	429718
D12	14	459569	662866
E1	14	358901	506147
E2	14	390799	498111
E3	14	421786	512838
E4	14	463901	678263
E5	14	385259	598298
E6	14	420177	632724
E7	14	334227	516511
E8	14	424712	593328
E9	14	412110	572054
E10	14	305318	481481
E11	14	240858	411082
E12	14	477205	644062
F1	14	356412	537966
F2	14	413425	549915
F3	14	468864	629720
F4	14	410754	564317
F5	14	447342	595354
F6	14	440399	582087
F7	14	362303	565236
F8	14	487878	656491
F9	14	461414	662802
F10	14	352366	559181
F11	14	264303	460597
F12	14	467876	678767
G1	14	338693	517511
G2	14	435516	595349
G3	14	525471	740984
G4	14	465593	640655
G5	14	422843	588223
G6	14	442455	578240
G7	14	377001	546112
G8	14	449692	612227
G9	14	467966	629755
G10	14	348757	519947
G11	14	281736	463926
G12	14	506878	724465
H1	14	385705	525224
H2	14	408011	526770
H3	14	477922	604324
H4	14
H5	14
H6	14
H7	14	390830	623614
H8	14	450484	679886
H9	14	474157	694877
H10	14
H11	14
H12	14
A1	15	242695	386754
A2	15	267931	386015
A3	15	318506	431474
A4	15	321437	393018
A5	15	338850	389560
A6	15	302428	357205
A7	15	283029	405321
A8	15	327212	450210
A9	15	365112	507556
A10	15	302394	498371
A11	15	237282	422761
A12	15	458342	580740
B1	15	247394	367902
B2	15	281950	403681
B3	15	307516	408815
B4	15	324885	466580
B5	15	311289	431232
B6	15	290644	428623
B7	15	266555	397115
B8	15	314377	449301
B9	15	323195	446124
B10	15	264684	465863
B11	15	228309	403443
B12	15	439550	593598
C1	15	288851	447840
C2	15	310504	435444
C3	15	344753	465986
C4	15	306807	471053
C5	15	304376	470361
C6	15	323955	503887
C7	15	272331	456374
C8	15	338613	486064
C9	15	327278	489933
C10	15	251073	436069
C11	15	227361	400651
C12	15	434435	592557
D1	15	401128	548819
D2	15	349906	466334
D3	15	384163	498871
D4	15	358207	481321
D5	15	363836	515029
D6	15	366272	514121
D7	15	322683	508467
D8	15	353396	510186
D9	15	358008	518440
D10	15	283222	502844
D11	15	230081	429974
D12	15	459985	662289
E1	15	358535	505195
E2	15	390584	498571
E3	15	422282	513426
E4	15	464231	678201
E5	15	385913	598524
E6	15	420502	633222
E7	15	334260	516412
E8	15	425240	593206
E9	15	412984	571949
E10	15	305913	481473
E11	15	241395	410598
E12	15	477560	644625
F1	15	356460	538101
F2	15	414254	549860
F3	15	469559	628293
F4	15	410518	564868
F5	15	446764	595045
F6	15	440512	581868
F7	15	362461	564817
F8	15	488845	655240
F9	15	462114	661951
F10	15	353841	558919
F11	15	264134	460433
F12	15	468343	678611
G1	15	338916	517574
G2	15	436221	595942
G3	15	526410	741223
G4	15	465543	640163
G5	15	423265	588680
G6	15	443338	577543
G7	15	377294	546568
G8	15	450600	613133
G9	15	469090	630087
G10	15	349428	519918
G11	15	282423	464305
G12	15	507469	724033
H1	15	385789	523596
H2	15	407727	527320
H3	15	477544	604236
H4	15
H5	15
H6	15
H7	15	391095	622942
H8	15	451425	680050
H9	15	474998	693243
H10	15
H11	15
H12	15
A1	16	243291	385972
A2	16	269058	385844
A3	16	319093	430752
A4	16	322481	392961
A5	16	340040	389616
A6	16	302990	357568
A7	16	283657	406318
A8	16	327770	450042
A9	16	366047	507958
A10	16	302938	498488
A11	16	237407	422981
A12	16	460382	580642
B1	16	248207	367214
B2	16	283117	403481
B3	16	308123	408653
B4	16	325081	466434
B5	16	311645	430816
B6	16	291245	429086
B7	16	267339	397060
B8	16	315351	449116
B9	16	323836	446160
B10	16	265191	465993
B11	16	228962	403121
B12	16	440675	593322
C1	16	289236	447912
C2	16	311594	435674
C3	16	344134	465934
C4	16	307989	470660
C5	16	305059	469684
C6	16	324359	503840
C7	16	271864	455940
C8	16	339455	485883
C9	16	328658	489582
C10	16	251256	436148
C11	16	227699	400387
C12	16	435745	592059
D1	16	402510	549030
D2	16	351051	466212
D3	16	384586	497856
D4	16	358279	480787
D5	16	364626	515260
D6	16	367128	514437
D7	16	323438	508325
D8	16	353893	510483
D9	16	357820	518656
D10	16	284211	503014
D11	16	230551	429917
D12	16	460470	662272
E1	16	359116	505926
E2	16	391785	498156
E3	16	422929	513581
E4	16	465120	678183
E5	16	386503	598223
E6	16	422110	630943
E7	16	335120	516360
E8	16	426105	593286
E9	16	413584	571832
E10	16	306817	481449
E11	16	241898	410343
E12	16	477921	644031
F1	16	356912	537962
F2	16	415308	549781
F3	16	470489	629287
F4	16	411153	564726
F5	16	448386	594917
F6	16	441556	581492
F7	16	363359	565279
F8	16	489501	656345
F9	16	462660	662264
F10	16	353992	559009
F11	16	264844	460347
F12	16	468913	678346
G1	16	340196	517720
G2	16	437331	595003
G3	16	527245	742171
G4	16	466589	640510
G5	16	423957	588024
G6	16	443651	578882
G7	16	377933	546450
G8	16	450940	612150
G9	16	469780	629943
G10	16	350930	520194
G11	16	282452	464116
G12	16	509245	724375
H1	16	385272	523203
H2	16	408205	527127
H3	16	478567	603944
H4	16
H5	16
H6	16
H7	16	391094	623070
H8	16	451759	679875
H9	16	475843	692788
H10	16
H11	16
H12	16
A1	17	242739	385008
A2	17	268923	385899
A3	17	319299	431501
A4	17	322246	393607
A5	17	339497	389768
A6	17	303057	357963
A7	17	283665	405971
A8	17	327545	449958
A9	17	365389	506906
A10	17	303768	498155
A11	17	237670	422960
A12	17	459919	580414
B1	17	248016	367420
B2	17	282638	402734
B3	17	308427	408550
B4	17	325323	466669
B5	17	312337	430924
B6	17	291723	428702
B7	17	268112	397343
B8	17	315265	448865
B9	17	323972	446228
B10	17	264809	466019
B11	17	228585	402906
B12	17	440573	594269
C1	17	288381	447714
C2	17	311256	435495
C3	17	345302	465595
C4	17	308162	470974
C5	17	305576	470178
C6	17	324648	503635
C7	17	272561	456060
C8	17	339680	485694
C9	17	328926	489933
C10	17	251361	436640
C11	17	227580	400902
C12	17	436022	592181
D1	17	403649	549554
D2	17	350782	465669
D3	17	384730	497985
D4	17	359263	481115
D5	17	365406	515595
D6	17	367199	514252
D7	17	323909	508286
D8	17	354883	510234
D9	17	357913	519006
D10	17	284711	503079
D11	17	231049	429397
D12	17	461020	664125
E1	17	359612	506004
E2	17	391703	498133
E3	17	423143	513507
E4	17	465932	677759
E5	17	386813	597675
E6	17	422670	632052
E7	17	336134	516430
E8	17	427365	593886
E9	17	414586	572249
E10	17	307201	481294
E11	17	241781	410187
E12	17	478113	643856
F1	17	357440	538067
F2	17	415770	549756
F3	17	471171	628812
F4	17	411667	564471
F5	17	448870	594726
F6	17	441964	581154
F7	17	363537	564977
F8	17	490044	655497
F9	17	462652	662751
F10	17	354629	559012
F11	17	265783	460233
F12	17	468839	679097
G1	17	338494	517449
G2	17	437729	596213
G3	17	527458	741730
G4	17	465715	642599
G5	17	423957	588058
G6	17	444202	577529
G7	17	378686	546626
G8	17	451342	612138
G9	17	470478	630501
G10	17	350127	520036
G11	17	282663	464124
G12	17	509704	726214
H1	17	385824	522990
H2	17	409014	527540
H3	17	477872	604576
H4	17
H5	17
H6	17
H7	17	390927	623203
H8	17	451689	679190
H9	17	476254	694108
H10	17
H11	17
H12	17
A1	18	242959	384947
A2	18	269203	385987
A3	18	319619	431673
A4	18	322586	393291
A5	18	340012	389398
A6	18	303563	358371
A7	18	284733	405826
A8	18	328775	450130
A9	18	367209	507397
A10	18	303821	498365
A11	18	238201	423143
A12	18	460739	580036
B1	18	248172	367292
B2	18	282812	403399
B3	18	308446	409247
B4	18	325956	466774
B5	18	312516	430804
B6	18	291995	428904
B7	18	268133	397436
B8	18	315962	448442
B9	18	324553	446150
B10	18	265830	465746
B11	18	228895	403646
B12	18	441166	593978
C1	18	288293	447721
C2	18	311822	435215
C3	18	345710	465783
C4	18	308178	471681
C5	18	305893	470221
C6	18	324582	504233
C7	18	272435	455984
C8	18	340167	486100
C9	18	329527	490222
C10	18	251979	436532
C11	18	227847	400345
C12	18	436476	592500
D1	18	404111	548753
D2	18	351144	465682
D3	18	385273	498586
D4	18	359595	481599
D5	18	365734	515995
D6	18	367873	514564
D7	18	324812	508895
D8	18	355225	510282
D9	18	359064	518612
D10	18	284397	503120
D11	18	231102	429415
D12	18	461704	663100
E1	18	359653	505642
E2	18	391321	498332
E3	18	423555	513554
E4	18	466951	677687
E5	18	387385	597546
E6	18	423285	631845
E7	18	336695	516803
E8	18	428400	594109
E9	18	414812	572032
E10	18	307677	481018
E11	18	242165	410797
E12	18	478526	644725
F1	18	357859	538074
F2	18	415826	549736
F3	18	471679	627524
F4	18	411196	564106
F5	18	448774	594144
F6	18	442172	581591
F7	18	364391	564340
F8	18	490510	656867
F9	18	463670	662379
F10	18	355136	559008
F11	18	265265	460142
F12	18	469765	678435
G1	18	339974	517186
G2	18	438551	596042
G3	18	528282	741434
G4	18	467010	640892
G5	18	424454	587709
G6	18	444270	576853
G7	18	378881	546134
G8	18	452264	612327
G9	18	471382	629808
G10	18	350920	520118
G11	18	283540	464260
G12	18	509649	724238
H1	18	385383	522621
H2	18	409191	526908
H3	18	479494	604255
H4	18
H5	18
H6	18
H7	18	391020	622447
H8	18	452413	678871
H9	18	476575	692623
H10	18
H11	18
H12	18
A1	19	242512	384514
A2	19	269637	385808
A3	19	319924	431850
A4	19	322819	393824
A5	19	339881	389913
A6	19	303328	357372
A7	19	285182	406225
A8	19	328455	449911
A9	19	366699	507469
A10	19	304605	498168
A11	19	238619	423153
A12	19	460046	579388
B1	19	248518	367235
B2	19	282712	402414
B3	19	309113	409248
B4	19	325984	467119
B5	19	312565	430746
B6	19	291894	428641
B7	19	268818	397665
B8	19	316641	448811
B9	19	324775	446224
B10	19	265789	465929
B11	19	229238	403503
B12	19	441395	594051
C1	19	287560	447220
C2	19	311586	435187
C3	19	345761	465956
C4	19	308380	471473
C5	19	305745	469909
C6	19	325383	504150
C7	19	272708	456299
C8	19	340063	485968
C9	19	329655	489751
C10	19	251825	435964
C11	19	228500	400443
C12	19	436552	592244
D1	19	405342	548882
D2	19	351528	465322
D3	19	385413	498574
D4	19	359760	481171
D5	19	365709	515711
D6	19	367757	514180
D7	19	325376	508833
D8	19	355883	510251
D9	19	359382	518278
D10	19	285241	503461
D11	19	231765	429341
D12	19	461133	663617
E1	19	359955	505609
E2	19	391389	498171
E3	19	422985	513110
E4	19	467373	678455
E5	19	387734	598405
E6	19	423826	632228
E7	19	337678	515752
E8	19	428790	593790
E9	19	415684	572150
E10	19	307620	481457
E11	19	242535	410009
E12	19	478264	643960
F1	19	357656	537486
F2	19	416398	549922
F3	19	472435	628857
F4	19	411744	563845
F5	19	448704	594601
F6	19	442845	580936
F7	19	364295	564177
F8	19	490722	655409
F9	19	464515	661903
F10	19	356250	558907
F11	19	265636	460263
F12	19	469201	678791
G1	19	338598	517573
G2	19	439036	595948
G3	19	528545	741639
G4	19	466711	640785
G5	19	424560	587829
G6	19	444666	577773
G7	19	378685	546074
G8	19	452402	612645
G9	19	471814	630041
G10	19	352156	519788
G11	19	283680	464241
G12	19	510472	722863
H1	19	386291	521641
H2	19	409226	527452
H3	19	478536	604262
H4	19
H5	19
H6	19
H7	19	391062	622918
H8	19	452758	679897
H9	19	476798	692804
H10	19
H11	19
H12	19
A1	20	242220	383916
A2	20	270528	385724
A3	20	320639	431342
A4	20	323213	393769
A5	20	340697	389733
A6	20	303609	358103
A7	20	285620	405983
A8	20	328385	449833
A9	20	367078	508254
A10	20	304804	497943
A11	20	239023	423623
A12	20	459968	579136
B1	20	249347	367560
B2	20	283697	402507
B3	20	309916	408921
B4	20	326568	466714
B5	20	313012	430662
B6	20	292228	428332
B7	20	268854	397881
B8	20	317039	448509
B9	20	324930	445915
B10	20	265781	466060
B11	20	229550	403079
B12	20	442077	594737
C1	20	288260	447595
C2	20	312493	434780
C3	20	346447	465592
C4	20	308607	471330
C5	20	306260	469818
C6	20	326014	504430
C7	20	272794	456073
C8	20	341153	485742
C9	20	330011	489887
C10	20	252044	436788
C11	20	228092	400835
C12	20	436725	592250
D1	20	406232	549387
D2	20	351917	465593
D3	20	385789	498046
D4	20	360311	481358
D5	20	365762	516422
D6	20	368586	514913
D7	20	325901	509032
D8	20	356125	510663
D9	20	360159	518549
D10	20	285647	502892
D11	20	232003	430139
D12	20	462769	661818
E1	20	359914	506133
E2	20	392612	498398
E3	20	423304	513758
E4	20	468185	678233
E5	20	387632	598101
E6	20	424616	632224
E7	20	338001	516527
E8	20	430249	593741
E9	20	416336	572189
E10	20	308770	480977
E11	20	243127	410112
E12	20	478613	643080
F1	20	357926	537870
F2	20	417055	550100
F3	20	472461	629325
F4	20	411774	564427
F5	20	449215	594168
F6	20	443651	580811
F7	20	365547	564262
F8	20	492047	655907
F9	20	465454	661762
F10	20	357162	558513
F11	20	266451	460473
F12	20	470557	677944
G1	20	339106	517108
G2	20	439190	596850
G3	20	528513	742126
G4	20	467831	639682
G5	20	425780	588003
G6	20	444909	578794
G7	20	379878	546526
G8	20	453106	613420
G9	20	472470	630400
G10	20	352336	519827
G11	20	284260	464358
G12	20	511288	724642
H1	20	385999	521423
H2	20	409431	527355
H3	20	477942	603627
H4	20
H5	20
H6	20
H7	20	391363	622454
H8	20	452969	679297
H9	20	477321	692728
H10	20
H11	20
H12	20
A1	21	241906	383490
A2	21	270121	386005
A3	21	321366	431709
A4	21	323297	393418
A5	21	340545	389494
A6	21	303727	357723
A7	21	285650	406118
A8	21	328541	449820
A9	21	367931	507862
A10	21	305480	498861
A11	21	238863	423006
A12	21	460450	578486
B1	21	249134	367378
B2	21	283634	402851
B3	21	309975	409295
B4	21	326780	467019
B5	21	313156	431043
B6	21	292599	428693
B7	21	269868	397764
B8	21	317491	448538
B9	21	325260	446715
B10	21	266029	466513
B11	21	229530	403760
B12	21	442220	594609
C1	21	287561	447166
C2	21	312878	434257
C3	21	346599	465708
C4	21	308691	471176
C5	21	306363	470408
C6	21	325910	504203
C7	21	272847	455910
C8	21	341014	485834
C9	21	330345	489735
C10	21	252184	436840
C11	21	228456	400869
C12	21	436912	592475
D1	21	406880	549970
D2	21	351806	465323
D3	21	385449	498203
D4	21	360505	481463
D5	21	365914	515806
D6	21	368252	515158
D7	21	325855	508693
D8	21	356763	510857
D9	21	360324	518626
D10	21	285561	503805
D11	21	232439	429992
D12	21	462074	663356
E1	21	359930	505682
E2	21	392610	498386
E3	21	423539	513718
E4	21	468214	678150
E5	21	388023	597463
E6	21	425027	631962
E7	21	337805	516223
E8	21	429902	594204
E9	21	416764	571846
E10	21	308806	481085
E11	21	243365	409948
E12	21	478426	643498
F1	21	356772	537562
F2	21	417139	550124
F3	21	473312	628317
F4	21	411546	563892
F5	21	448985	594115
F6	21	443142	580811
F7	21	365005	564094
F8	21	491967	654894
F9	21	465503	662564
F10	21	356946	559177
F11	21	266367	460742
F12	21	470099	677933
G1	21	339940	517648
[truncated: 10,967 more rows]

## Sheet: Amplification Data
Block Type	96alum
Chemistry	SYBR_GREEN
Experiment File Name	D:\HAIFENG\Untitled.eds
Experiment Run End Time	2021-08-29 11:47:26 AM CST
Instrument Type	sds7500
Passive Reference	ROX
Well	Cycle	Target Name	Rn	ΔRn
A1	1	CBF6	0.616181	0.0041154
A1	2	CBF6	0.611336	-0.00177653
A1	3	CBF6	0.611198	-0.00296149
A1	4	CBF6	0.613756	-0.00145023
A1	5	CBF6	0.614719	-0.00153309
A1	6	CBF6	0.615844	-0.00145509
A1	7	CBF6	0.617633	-0.000712665
A1	8	CBF6	0.620955	0.00156285
A1	9	CBF6	0.621126	0.000686644
A1	10	CBF6	0.622309	0.000823482
A1	11	CBF6	0.623221	0.00068888
A1	12	CBF6	0.625018	0.00143845
A1	13	CBF6	0.626669	0.00204265
A1	14	CBF6	0.62917	0.00349729
A1	15	CBF6	0.627519	0.000799506
A1	16	CBF6	0.630332	0.00256629
A1	17	CBF6	0.630477	0.00166428
A1	18	CBF6	0.631149	0.00128983
A1	19	CBF6	0.630696	-0.00020954
A1	20	CBF6	0.630919	-0.00103401
A1	21	CBF6	0.630803	-0.00219679
A1	22	CBF6	0.631491	-0.00255509
A1	23	CBF6	0.633357	-0.0017356
A1	24	CBF6	0.634566	-0.00157295
A1	25	CBF6	0.637542	0.000356377
A1	26	CBF6	0.645421	0.00718795
A1	27	CBF6	0.660047	0.0207675
A1	28	CBF6	0.681854	0.0415278
A1	29	CBF6	0.73094	0.0895671
A1	30	CBF6	0.813602	0.171182
A1	31	CBF6	0.957154	0.313688
A1	32	CBF6	1.16654	0.522023
A1	33	CBF6	1.42656	0.781001
A1	34	CBF6	1.69034	1.04374
A1	35	CBF6	1.91279	1.26514
A1	36	CBF6	2.08764	1.43894
A1	37	CBF6	2.22974	1.57999
A1	38	CBF6	2.3413	1.69051
A1	39	CBF6	2.43604	1.7842
A1	40	CBF6	2.51289	1.86001
A2	1	CBF6	0.670025	-0.00244937
A2	2	CBF6	0.671726	-0.00229161
A2	3	CBF6	0.673468	-0.00209337
A2	4	CBF6	0.677381	0.000276202
A2	5	CBF6	0.677586	-0.00106229
A2	6	CBF6	0.678529	-0.00166305
A2	7	CBF6	0.682402	0.000666645
A2	8	CBF6	0.68462	0.00134148
A2	9	CBF6	0.687618	0.00279535
A2	10	CBF6	0.687505	0.00113881
A2	11	CBF6	0.687751	-0.000158319
A2	12	CBF6	0.690157	0.000704211
A2	13	CBF6	0.69223	0.00123313
A2	14	CBF6	0.692622	8.25162e-05
A2	15	CBF6	0.694096	1.22333e-05
A2	16	CBF6	0.697323	0.00169617
A2	17	CBF6	0.696873	-0.000297669
A2	18	CBF6	0.697442	-0.00127227
A2	19	CBF6	0.698889	-0.00136896
A2	20	CBF6	0.701351	-0.000449748
A2	21	CBF6	0.699788	-0.00355683
A2	22	CBF6	0.703803	-0.00108527
A2	23	CBF6	0.704643	-0.00178826
A2	24	CBF6	0.709239	0.00126325
A2	25	CBF6	0.713105	0.00358604
A2	26	CBF6	0.721383	0.0103211
A2	27	CBF6	0.736715	0.0241088
A2	28	CBF6	0.771194	0.0570449
A2	29	CBF6	0.830114	0.114421
A2	30	CBF6	0.933497	0.21626
A2	31	CBF6	1.10439	0.385608
A2	32	CBF6	1.35408	0.633752
A2	33	CBF6	1.6524	0.930528
A2	34	CBF6	1.94911	1.2257
A2	35	CBF6	2.19027	1.46532
A2	36	CBF6	2.38524	1.65874
A2	37	CBF6	2.54745	1.81941
A2	38	CBF6	2.67187	1.94228
A2	39	CBF6	2.77405	2.04292
A2	40	CBF6	2.86731	2.13464
A3	1	CBF6	0.712625	-0.00199708
A3	2	CBF6	0.714991	-0.00120572
A3	3	CBF6	0.715516	-0.00225525
A3	4	CBF6	0.717932	-0.00141412
A3	5	CBF6	0.720317	-0.00060315
A3	6	CBF6	0.721012	-0.0014831
A3	7	CBF6	0.724488	0.000418573
A3	8	CBF6	0.724392	-0.00125168
A3	9	CBF6	0.729174	0.00195647
A3	10	CBF6	0.730328	0.00153583
A3	11	CBF6	0.731054	0.00068747
A3	12	CBF6	0.735081	0.0031396
A3	13	CBF6	0.735364	0.00184861
A3	14	CBF6	0.736141	0.00105019
A3	15	CBF6	0.738182	0.00151725
A3	16	CBF6	0.740781	0.00254214
A3	17	CBF6	0.739972	0.000158421
A3	18	CBF6	0.740419	-0.000969369
A3	19	CBF6	0.740823	-0.00213966
A3	20	CBF6	0.743353	-0.00118456
A3	21	CBF6	0.744403	-0.00170838
A3	22	CBF6	0.744991	-0.00269526
A3	23	CBF6	0.747528	-0.00173271
A3	24	CBF6	0.750229	-0.00060566
A3	25	CBF6	0.755598	0.00318834
A3	26	CBF6	0.763948	0.00996365
A3	27	CBF6	0.781465	0.0259065
A3	28	CBF6	0.810871	0.0537386
A3	29	CBF6	0.871097	0.11239
A3	30	CBF6	0.972227	0.211945
A3	31	CBF6	1.13706	0.375201
A3	32	CBF6	1.37567	0.612238
A3	33	CBF6	1.66011	0.8951
A3	34	CBF6	1.937	1.17042
A3	35	CBF6	2.16374	1.39559
A3	36	CBF6	2.347	1.57727
A3	37	CBF6	2.49069	1.71939
A3	38	CBF6	2.61333	1.84045
A3	39	CBF6	2.71299	1.93854
A3	40	CBF6	2.78462	2.00859
A4	1	CBF6	0.794285	-0.00375669
A4	2	CBF6	0.79497	-0.00435288
A4	3	CBF6	0.796706	-0.00389836
A4	4	CBF6	0.796447	-0.00543917
A4	5	CBF6	0.801443	-0.00172535
A4	6	CBF6	0.804204	-0.000246223
A4	7	CBF6	0.806868	0.00113604
A4	8	CBF6	0.80828	0.00126685
A4	9	CBF6	0.809486	0.00119017
A4	10	CBF6	0.812368	0.00279125
A4	11	CBF6	0.814155	0.00329619
A4	12	CBF6	0.814546	0.00240568
A4	13	CBF6	0.815996	0.00257392
A4	14	CBF6	0.816165	0.00146101
A4	15	CBF6	0.817869	0.0018834
A4	16	CBF6	0.820645	0.00337719
A4	17	CBF6	0.818699	0.000149813
A4	18	CBF6	0.820221	0.000390174
A4	19	CBF6	0.819703	-0.00140991
A4	20	CBF6	0.820818	-0.00157635
A4	21	CBF6	0.821765	-0.00191118
A4	22	CBF6	0.823162	-0.00179617
A4	23	CBF6	0.823263	-0.00297749
A4	24	CBF6	0.825223	-0.0022988
A4	25	CBF6	0.826527	-0.00227671
A4	26	CBF6	0.833719	0.00363402
A4	27	CBF6	0.841865	0.0104981
A4	28	CBF6	0.860054	0.0274053
A4	29	CBF6	0.895684	0.0617534
A4	30	CBF6	0.959816	0.124603
A4	31	CBF6	1.07276	0.236264
A4	32	CBF6	1.25832	0.420545
A4	33	CBF6	1.52885	0.689792
A4	34	CBF6	1.85494	1.0146
A4	35	CBF6	2.16951	1.32789
A4	36	CBF6	2.41329	1.57039
A4	37	CBF6	2.59783	1.75365
A4	38	CBF6	2.74716	1.90169
A4	39	CBF6	2.86222	2.01547
A4	40	CBF6	2.9624	2.11437
A5	1	CBF6	0.839971	-0.00996851
A5	2	CBF6	0.845098	-0.00615408
A5	3	CBF6	0.847488	-0.00507647
A5	4	CBF6	0.850495	-0.0033817
A5	5	CBF6	0.853245	-0.00194372
A5	6	CBF6	0.856104	-0.000397908
A5	7	CBF6	0.858687	0.000872827
A5	8	CBF6	0.861869	0.00274325
A5	9	CBF6	0.863348	0.0029098
A5	10	CBF6	0.86361	0.001859
A5	11	CBF6	0.864376	0.00131352
A5	12	CBF6	0.866718	0.00234321
A5	13	CBF6	0.867932	0.00224453
A5	14	CBF6	0.867843	0.000843014
A5	15	CBF6	0.869828	0.00151556
A5	16	CBF6	0.872758	0.00313331
A5	17	CBF6	0.871023	8.62854e-05
A5	18	CBF6	0.873174	0.000924708
A5	19	CBF6	0.871683	-0.00187806
A5	20	CBF6	0.87418	-0.00069351
A5	21	CBF6	0.874327	-0.00185917
A5	22	CBF6	0.8746	-0.0028986
A5	23	CBF6	0.87568	-0.00313073
A5	24	CBF6	0.877811	-0.00231144
A5	25	CBF6	0.880426	-0.00100888
A5	26	CBF6	0.886538	0.00379117
A5	27	CBF6	0.896078	0.0120186
A5	28	CBF6	0.915446	0.0300741
A5	29	CBF6	0.954352	0.0676681
A5	30	CBF6	1.02406	0.136062
A5	31	CBF6	1.14675	0.257446
A5	32	CBF6	1.34242	0.451804
A5	33	CBF6	1.62243	0.730501
A5	34	CBF6	1.95236	1.05911
A5	35	CBF6	2.26335	1.36879
A5	36	CBF6	2.49519	1.59932
A5	37	CBF6	2.66831	1.77113
A5	38	CBF6	2.80476	1.90627
A5	39	CBF6	2.91998	2.02018
A5	40	CBF6	3.00803	2.10691
A6	1	CBF6	0.822448	-0.00472734
A6	2	CBF6	0.823721	-0.00465594
A6	3	CBF6	0.82564	-0.00393889
A6	4	CBF6	0.827741	-0.0030394
A6	5	CBF6	0.830808	-0.00117461
A6	6	CBF6	0.833003	-0.000181245
A6	7	CBF6	0.835479	0.0010937
A6	8	CBF6	0.836079	0.000492104
A6	9	CBF6	0.837503	0.000714069
A6	10	CBF6	0.83949	0.00149882
A6	11	CBF6	0.841998	0.00280541
A6	12	CBF6	0.842062	0.00166821
A6	13	CBF6	0.843716	0.00212031
A6	14	CBF6	0.844708	0.00191056
A6	15	CBF6	0.846651	0.00265192
A6	16	CBF6	0.847363	0.00216209
A6	17	CBF6	0.846615	0.00021212
A6	18	CBF6	0.847063	-0.000541107
A6	19	CBF6	0.848774	-3.17277e-05
A6	20	CBF6	0.847826	-0.00218197
A6	21	CBF6	0.849057	-0.00215199
A6	22	CBF6	0.85058	-0.00183054
A6	23	CBF6	0.850367	-0.00324592
A6	24	CBF6	0.853638	-0.00117591
A6	25	CBF6	0.855197	-0.000818821
A6	26	CBF6	0.860201	0.00298282
A6	27	CBF6	0.868789	0.0103692
A6	28	CBF6	0.885493	0.0258718
A6	29	CBF6	0.919537	0.0587138
A6	30	CBF6	0.978936	0.116912
A6	31	CBF6	1.08453	0.221299
A6	32	CBF6	1.26192	0.397494
A6	33	CBF6	1.51022	0.644589
A6	34	CBF6	1.81285	0.946015
A6	35	CBF6	2.10365	1.23562
A6	36	CBF6	2.33215	1.46292
A6	37	CBF6	2.50077	1.63033
A6	38	CBF6	2.6342	1.76257
A6	39	CBF6	2.74227	1.86943
A6	40	CBF6	2.83202	1.95798
A7	1	CBF7	0.66194	-0.00931564
A7	2	CBF7	0.666705	-0.00624241
A7	3	CBF7	0.669679	-0.00495953
A7	4	CBF7	0.673348	-0.00298201
A7	5	CBF7	0.675607	-0.0024136
A7	6	CBF7	0.679496	-0.000216261
A7	7	CBF7	0.680899	-0.000504613
A7	8	CBF7	0.684665	0.00157084
A7	9	CBF7	0.68584	0.00105444
A7	10	CBF7	0.688904	0.00242733
A7	11	CBF7	0.691031	0.00286317
A7	12	CBF7	0.691222	0.00136276
A7	13	CBF7	0.69515	0.00359932
A7	14	CBF7	0.695757	0.00251536
A7	15	CBF7	0.698283	0.00335056
A7	16	CBF7	0.698115	0.00149115
A7	17	CBF7	0.698731	0.000416076
A7	18	CBF7	0.701613	0.00160616
A7	19	CBF7	0.70203	0.000332541
A7	20	CBF7	0.703528	0.00013902
A7	21	CBF7	0.703367	-0.0017133
A7	22	CBF7	0.704351	-0.00242037
A7	23	CBF7	0.705909	-0.00255339
A7	24	CBF7	0.706416	-0.00373737
A7	25	CBF7	0.709047	-0.0027978
A7	26	CBF7	0.711666	-0.0018698
A7	27	CBF7	0.71287	-0.00235765
A7	28	CBF7	0.716841	-7.71614e-05
A7	29	CBF7	0.724484	0.00587414
A7	30	CBF7	0.733951	0.0136501
A7	31	CBF7	0.756031	0.034039
A7	32	CBF7	0.796916	0.0732323
A7	33	CBF7	0.868059	0.142684
A7	34	CBF7	0.991598	0.264532
A7	35	CBF7	1.19489	0.466129
A7	36	CBF7	1.48285	0.7524
A7	37	CBF7	1.82315	1.09101
A7	38	CBF7	2.14951	1.41568
A7	39	CBF7	2.39262	1.6571
A7	40	CBF7	2.55718	1.81997
A8	1	CBF7	0.69857	-0.00948827
A8	2	CBF7	0.701727	-0.00750043
A8	3	CBF7	0.706688	-0.00370967
A8	4	CBF7	0.707249	-0.00431844
A8	5	CBF7	0.710693	-0.00204396
A8	6	CBF7	0.713299	-0.000607885
A8	7	CBF7	0.715221	0.000143398
A8	8	CBF7	0.716601	0.000354305
A8	9	CBF7	0.718724	0.00130693
A8	10	CBF7	0.719609	0.0010224
A8	11	CBF7	0.722267	0.00251064
A8	12	CBF7	0.722107	0.00118053
A8	13	CBF7	0.725254	0.00315698
A8	14	CBF7	0.7259	0.00263326
A8	15	CBF7	0.726798	0.00236137
A8	16	CBF7	0.728308	0.00270192
A8	17	CBF7	0.727947	0.00117118
A8	18	CBF7	0.730399	0.00245276
A8	19	CBF7	0.730045	0.000928757
A8	20	CBF7	0.730016	-0.000270224
A8	21	CBF7	0.730382	-0.00107361
A8	22	CBF7	0.732639	1.31876e-05
A8	23	CBF7	0.73226	-0.00153555
A8	24	CBF7	0.73267	-0.00229561
A8	25	CBF7	0.734528	-0.00160756
A8	26	CBF7	0.733101	-0.00420398
A8	27	CBF7	0.734574	-0.00390074
A8	28	CBF7	0.739214	-0.000430475
A8	29	CBF7	0.741281	0.000466243
A8	30	CBF7	0.745579	0.00359384
A8	31	CBF7	0.753468	0.010313
A8	32	CBF7	0.771454	0.0271296
A8	33	CBF7	0.800427	0.0549328
A8	34	CBF7	0.858643	0.111979
A8	35	CBF7	0.958516	0.210682
A8	36	CBF7	1.12305	0.374048
A8	37	CBF7	1.35793	0.607755
A8	38	CBF7	1.64182	0.89048
A8	39	CBF7	1.92282	1.17031
A8	40	CBF7	2.13618	1.3825
A9	1	CBF7	0.693602	-0.00660022
A9	2	CBF7	0.696769	-0.00466221
A9	3	CBF7	0.697976	-0.00468448
A9	4	CBF7	0.700841	-0.00304932
A9	5	CBF7	0.702302	-0.00281677
A9	6	CBF7	0.705546	-0.000802765
A9	7	CBF7	0.706595	-0.000982208
A9	8	CBF7	0.709118	0.000311656
A9	9	CBF7	0.712001	0.00196523
A9	10	CBF7	0.713724	0.00245849
A9	11	CBF7	0.714188	0.00169349
A9	12	CBF7	0.716457	0.0027338
A9	13	CBF7	0.717551	0.00259798
A9	14	CBF7	0.719333	0.00315072
A9	15	CBF7	0.719353	0.00194185
A9	16	CBF7	0.720625	0.00198491
A9	17	CBF7	0.720823	0.000953237
A9	18	CBF7	0.723712	0.00261284
A9	19	CBF7	0.722604	0.000275942
A9	20	CBF7	0.722234	-0.00132352
A9	21	CBF7	0.724471	-0.000315284
A9	22	CBF7	0.725703	-0.000312159
A9	23	CBF7	0.725906	-0.00133876
A9	24	CBF7	0.726442	-0.002032
A9	25	CBF7	0.728888	-0.000814726
A9	26	CBF7	0.72965	-0.00128212
A9	27	CBF7	0.7295	-0.00266111
A9	28	CBF7	0.732058	-0.00133261
A9	29	CBF7	0.735688	0.00106769
A9	30	CBF7	0.740723	0.00487342
A9	31	CBF7	0.751776	0.0146979
A9	32	CBF7	0.770533	0.0322256
A9	33	CBF7	0.808267	0.0687307
A9	34	CBF7	0.874148	0.133382
A9	35	CBF7	0.991318	0.249322
A9	36	CBF7	1.18095	0.437729
A9	37	CBF7	1.45052	0.706062
A9	38	CBF7	1.77181	1.02613
A9	39	CBF7	2.07731	1.3304
A9	40	CBF7	2.31487	1.56673
A10	1	CBF7	0.586644	-0.0073769
A10	2	CBF7	0.589368	-0.00546092
A10	3	CBF7	0.591082	-0.00455493
A10	4	CBF7	0.592677	-0.00376756
A10	5	CBF7	0.593264	-0.00398799
A10	6	CBF7	0.595484	-0.0025756
A10	7	CBF7	0.596828	-0.00204018
A10	8	CBF7	0.598409	-0.0012664
A10	9	CBF7	0.600697	0.000213099
A10	10	CBF7	0.602361	0.00106955
A10	11	CBF7	0.603055	0.000955939
A10	12	CBF7	0.604207	0.00129943
A10	13	CBF7	0.60615	0.0024349
A10	14	CBF7	0.606541	0.00201801
A10	15	CBF7	0.606766	0.00143567
A10	16	CBF7	0.607714	0.00157573
A10	17	CBF7	0.609786	0.00284018
A10	18	CBF7	0.609637	0.0018828
A10	19	CBF7	0.61145	0.00288785
A10	20	CBF7	0.612126	0.00275671
A10	21	CBF7	0.612354	0.00217657
A10	22	CBF7	0.613026	0.00204037
A10	23	CBF7	0.6138	0.00200669
A10	24	CBF7	0.613966	0.00136462
A10	25	CBF7	0.614425	0.00101605
A10	26	CBF7	0.615392	0.00117566
A10	27	CBF7	0.615284	0.000259411
A10	28	CBF7	0.61596	0.000127201
A10	29	CBF7	0.616891	0.000251231
A10	30	CBF7	0.616628	-0.000820288
A10	31	CBF7	0.617566	-0.000689343
A10	32	CBF7	0.619725	0.000661172
A10	33	CBF7	0.619134	-0.000737219
A10	34	CBF7	0.618992	-0.00168744
A10	35	CBF7	0.620812	-0.000675125
A10	36	CBF7	0.619531	-0.00276439
A10	37	CBF7	0.620717	-0.00238549
A10	38	CBF7	0.62293	-0.000980261
A10	39	CBF7	0.621202	-0.00351662
A10	40	CBF7	0.621653	-0.00387354
A11	1	CBF7	0.542301	-0.00235567
A11	2	CBF7	0.542654	-0.00304492
A11	3	CBF7	0.54354	-0.00320125
A11	4	CBF7	0.546853	-0.000930237
A11	5	CBF7	0.54699	-0.0018352
A11	6	CBF7	0.548989	-0.000878467
A11	7	CBF7	0.550397	-0.000512538
A11	8	CBF7	0.551261	-0.000691276
A11	9	CBF7	0.554094	0.00109909
A11	10	CBF7	0.55532	0.00128298
A11	11	CBF7	0.558484	0.00340486
A11	12	CBF7	0.5576	0.00147894
A11	13	CBF7	0.557815	0.000651997
A11	14	CBF7	0.561158	0.00295245
A11	15	CBF7	0.561267	0.00201924
A11	16	CBF7	0.561272	0.0009816
A11	17	CBF7	0.56192	0.000588107
A11	18	CBF7	0.562932	0.000557188
A11	19	CBF7	0.563908	0.000491461
A11	20	CBF7	0.564235	-0.000224077
A11	21	CBF7	0.564681	-0.000820583
A11	22	CBF7	0.564899	-0.00164401
A11	23	CBF7	0.566581	-0.00100467
A11	24	CBF7	0.568541	-8.65626e-05
A11	25	CBF7	0.568699	-0.000971556
A11	26	CBF7	0.570027	-0.000685199
A11	27	CBF7	0.569434	-0.00232026
A11	28	CBF7	0.569965	-0.00283171
A11	29	CBF7	0.571851	-0.00198841
A11	30	CBF7	0.574975	9.32439e-05
A11	31	CBF7	0.580948	0.00502483
A11	32	CBF7	0.590415	0.0134497
A11	33	CBF7	0.607944	0.0299363
A11	34	CBF7	0.640381	0.0613311
A11	35	CBF7	0.700279	0.120186
A11	36	CBF7	0.807125	0.22599
A11	37	CBF7	0.978774	0.396597
A11	38	CBF7	1.23005	0.646831
A11	39	CBF7	1.52259	0.938326
A11	40	CBF7	1.81185	1.22654
A12	1	CBF7	0.763743	-0.00782554
A12	2	CBF7	0.761898	-0.0107182
A12	3	CBF7	0.764279	-0.00938628
A12	4	CBF7	0.768384	-0.00632894
A12	5	CBF7	0.770384	-0.00537732
A12	6	CBF7	0.771893	-0.0049166
A12	7	CBF7	0.773972	-0.00388547
A12	8	CBF7	0.776368	-0.00253819
A12	9	CBF7	0.779894	-5.9438e-05
A12	10	CBF7	0.780984	-1.83963e-05
A12	11	CBF7	0.784838	0.00278747
A12	12	CBF7	0.784953	0.00185445
A12	13	CBF7	0.787474	0.00332713
A12	14	CBF7	0.789554	0.00435892
A12	15	CBF7	0.789238	0.00299461
A12	16	CBF7	0.792885	0.0055937
A12	17	CBF7	0.792397	0.0040579
A12	18	CBF7	0.794328	0.00494056
A12	19	CBF7	0.794021	0.00358519
A12	20	CBF7	0.794232	0.00274819
A12	21	CBF7	0.795956	0.0034245
A12	22	CBF7	0.797726	0.00414623
A12	23	CBF7	0.79798	0.00335143
A12	24	CBF7	0.798288	0.00261106
A12	25	CBF7	0.799215	0.00248997
A12	26	CBF7	0.800303	0.0025306
A12	27	CBF7	0.800704	0.00188267
A12	28	CBF7	0.801039	0.00116965
A12	29	CBF7	0.801554	0.00063694
A12	30	CBF7	0.802486	0.000520268
A12	31	CBF7	0.802881	-0.00013225
A12	32	CBF7	0.803542	-0.000519945
A12	33	CBF7	0.802765	-0.00234477
A12	34	CBF7	0.804406	-0.00175208
A12	35	CBF7	0.803056	-0.00415006
A12	36	CBF7	0.805052	-0.00320214
A12	37	CBF7	0.802728	-0.00657465
A12	38	CBF7	0.806813	-0.00353776
A12	39	CBF7	0.807112	-0.00428714
A12	40	CBF7	0.804787	-0.00766013
B1	1	CBF6	0.655044	0.00195324
B1	2	CBF6	0.654415	-6.80693e-05
B1	3	CBF6	0.654725	-0.00115049
B1	4	CBF6	0.655264	-0.00200414
B1	5	CBF6	0.658557	-0.00010311
B1	6	CBF6	0.660712	0.000659653
B1	7	CBF6	0.662342	0.000897358
B1	8	CBF6	0.662716	-0.000120985
B1	9	CBF6	0.666796	0.00256617
B1	10	CBF6	0.666965	0.00134267
B1	11	CBF6	0.666829	-0.000185769
B1	12	CBF6	0.667979	-0.000428417
B1	13	CBF6	0.669254	-0.00054518
B1	14	CBF6	0.672728	0.00153586
B1	15	CBF6	0.672447	-0.000137301
B1	16	CBF6	0.67592	0.00194374
B1	17	CBF6	0.675021	-0.000348178
B1	18	CBF6	0.675681	-0.0010803
B1	19	CBF6	0.676727	-0.00142678
B1	20	CBF6	0.678385	-0.00116136
B1	21	CBF6	0.67814	-0.00279917
B1	22	CBF6	0.680338	-0.00199332
B1	23	CBF6	0.684406	0.000681863
B1	24	CBF6	0.688973	0.00385718
B1	25	CBF6	0.695611	0.00910204
B1	26	CBF6	0.712249	0.0243475
B1	27	CBF6	0.744195	0.0549012
B1	28	CBF6	0.79964	0.108954
B1	29	CBF6	0.90382	0.211742
B1	30	CBF6	1.07151	0.378038
B1	31	CBF6	1.32821	0.633347
B1	32	CBF6	1.6545	0.958247
B1	33	CBF6	1.98412	1.28647
B1	34	CBF6	2.26036	1.56132
B1	35	CBF6	2.47624	1.77581
B1	36	CBF6	2.64476	1.94293
B1	37	CBF6	2.78799	2.08477
B1	38	CBF6	2.90065	2.19604
B1	39	CBF6	2.98879	2.28279
B1	40	CBF6	3.06319	2.3558
B2	1	CBF6	0.683408	-8.65434e-05
B2	2	CBF6	0.684253	-0.000347533
B2	3	CBF6	0.683265	-0.00244143
B2	4	CBF6	0.685065	-0.00174773
B2	5	CBF6	0.685724	-0.00219427
B2	6	CBF6	0.688398	-0.000626108
B2	7	CBF6	0.690815	0.000684319
B2	8	CBF6	0.692029	0.000792878
B2	9	CBF6	0.694339	0.00199679
B2	10	CBF6	0.695341	0.00189256
B2	11	CBF6	0.696698	0.00214316
B2	12	CBF6	0.697254	0.00159291
B2	13	CBF6	0.698552	0.00178515
B2	14	CBF6	0.698059	0.000186813
B2	15	CBF6	0.698448	-0.00053051
B2	16	CBF6	0.701687	0.00160198
B2	17	CBF6	0.701799	0.000608514
B2	18	CBF6	0.701072	-0.00122425
B2	19	CBF6	0.702541	-0.000861477
B2	20	CBF6	0.704825	0.000315912
B2	21	CBF6	0.704067	-0.00154773
B2	22	CBF6	0.703865	-0.00285567
B2	23	CBF6	0.706207	-0.00161963
B2	24	CBF6	0.71098	0.0020478
B2	25	CBF6	0.717471	0.00743238
B2	26	CBF6	0.7304	0.0192551
B2	27	CBF6	0.755437	0.0431866
B2	28	CBF6	0.799189	0.085832
B2	29	CBF6	0.881885	0.167422
B2	30	CBF6	1.01858	0.303007
B2	31	CBF6	1.23567	0.518997
B2	32	CBF6	1.51587	0.798084
B2	33	CBF6	1.81929	1.1004
B2	34	CBF6	2.08127	1.36128
B2	35	CBF6	2.27793	1.55683
B2	36	CBF6	2.44889	1.72669
B2	37	CBF6	2.578	1.85469
B2	38	CBF6	2.68711	1.9627
B2	39	CBF6	2.77466	2.04914
B2	40	CBF6	2.8435	2.11687
B3	1	CBF6	0.730788	-0.00199825
B3	2	CBF6	0.731677	-0.00242448
B3	3	CBF6	0.731634	-0.00378311
B3	4	CBF6	0.734752	-0.00198084
B3	5	CBF6	0.736395	-0.00165379
B3	6	CBF6	0.739208	-0.000156337
B3	7	CBF6	0.741034	0.000353642
B3	8	CBF6	0.742362	0.000366161
B3	9	CBF6	0.745232	0.00192023
B3	10	CBF6	0.747129	0.00250174
B3	11	CBF6	0.74928	0.00333776
B3	12	CBF6	0.748776	0.00151731
B3	13	CBF6	0.748983	0.000409085
B3	14	CBF6	0.750661	0.000771781
B3	15	CBF6	0.752212	0.00100674
B3	16	CBF6	0.753995	0.00147464
B3	17	CBF6	0.754932	0.00109568
B3	18	CBF6	0.753691	-0.00146088
B3	19	CBF6	0.75532	-0.00114784
B3	20	CBF6	0.757886	0.000102789
B3	21	CBF6	0.757339	-0.00176021
B3	22	CBF6	0.758748	-0.00166669
B3	23	CBF6	0.759694	-0.00203689
B3	24	CBF6	0.763835	0.000789024
B3	25	CBF6	0.769751	0.00538973
B3	26	CBF6	0.782223	0.0165453
B3	27	CBF6	0.80251	0.0355175
B3	28	CBF6	0.843526	0.0752175
B3	29	CBF6	0.916463	0.146838
B3	30	CBF6	1.04012	0.269185
B3	31	CBF6	1.2302	0.457943
B3	32	CBF6	1.48349	0.70992
B3	33	CBF6	1.74821	0.973319
B3	34	CBF6	1.98257	1.20636
B3	35	CBF6	2.16107	1.38355
B3	36	CBF6	2.30822	1.52939
B3	37	CBF6	2.42519	1.64504
B3	38	CBF6	2.51751	1.73605
B3	39	CBF6	2.6048	1.82202
B3	40	CBF6	2.67023	1.88613
B4	1	CBF6	0.683546	-0.00281877
B4	2	CBF6	0.683599	-0.00333956
B4	3	CBF6	0.68307	-0.00444227
B4	4	CBF6	0.685074	-0.0030122
B4	5	CBF6	0.685642	-0.00301759
B4	6	CBF6	0.687173	-0.00206036
B4	7	CBF6	0.689793	-1.39774e-05
B4	8	CBF6	0.689633	-0.000747437
B4	9	CBF6	0.691374	0.000419359
B4	10	CBF6	0.693627	0.00209923
B4	11	CBF6	0.69403	0.0019285
B4	12	CBF6	0.694329	0.00165352
B4	13	CBF6	0.695244	0.00199497
B4	14	CBF6	0.69601	0.00218765
B4	15	CBF6	0.696311	0.00191428
B4	16	CBF6	0.69695	0.0019794
B4	17	CBF6	0.697116	0.00157245
B4	18	CBF6	0.698315	0.00219798
B4	19	CBF6	0.69786	0.00116846
B4	20	CBF6	0.699719	0.00245375
B4	21	CBF6	0.699715	0.00187622
B4	22	CBF6	0.699968	0.0015563
B4	23	CBF6	0.698556	-0.000429991
B4	24	CBF6	0.699839	0.000279101
B4	25	CBF6	0.699483	-0.000650219
B4	26	CBF6	0.700355	-0.000351922
B4	27	CBF6	0.699352	-0.00192885
B4	28	CBF6	0.700354	-0.00150025
B4	29	CBF6	0.699221	-0.00320706
B4	30	CBF6	0.700466	-0.00253492
B4	31	CBF6	0.702623	-0.000951727
B4	32	CBF6	0.703716	-0.000432416
B4	33	CBF6	0.708389	0.00366663
B4	34	CBF6	0.718397	0.0131008
B4	35	CBF6	0.735915	0.0300452
B4	36	CBF6	0.768217	0.0617733
B4	37	CBF6	0.827653	0.120636
B4	38	CBF6	0.929133	0.221543
B4	39	CBF6	1.08351	0.375346
B4	40	CBF6	1.2872	0.578462
B5	1	CBF6	0.697172	-0.0101255
B5	2	CBF6	0.699504	-0.00873436
B5	3	CBF6	0.703352	-0.00582697
B5	4	CBF6	0.704834	-0.0052847
B5	5	CBF6	0.70813	-0.00292944
B5	6	CBF6	0.71135	-0.000649449
B5	7	CBF6	0.713133	0.000192456
B5	8	CBF6	0.713549	-0.000331539
B5	9	CBF6	0.715512	0.00069067
B5	10	CBF6	0.718345	0.00258388
B5	11	CBF6	0.718696	0.00199444
B5	12	CBF6	0.721476	0.00383389
B5	13	CBF6	0.721662	0.00307946
B5	14	CBF6	0.72237	0.00284741
B5	15	CBF6	0.72186	0.00139644
B5	16	CBF6	0.723383	0.00197907
B5	17	CBF6	0.724806	0.00246215
B5	18	CBF6	0.725425	0.00214022
B5	19	CBF6	0.725637	0.00141196
B5	20	CBF6	0.726816	0.0016509
B5	21	CBF6	0.726507	0.000401577
B5	22	CBF6	0.726473	-0.000573148
B5	23	CBF6	0.728139	0.000152587
B5	24	CBF6	0.729471	0.000543762
B5	25	CBF6	0.72735	-0.0025176
B5	26	CBF6	0.731319	0.000511315
B5	27	CBF6	0.729196	-0.00255214
B5	28	CBF6	0.730391	-0.00229787
B5	29	CBF6	0.730497	-0.00313205
B5	30	CBF6	0.7324	-0.00216957
B5	31	CBF6	0.735902	0.000392291
B5	32	CBF6	0.7414	0.00495043
B5	33	CBF6	0.753839	0.0164483
B5	34	CBF6	0.776199	0.037868
B5	35	CBF6	0.818679	0.0794077
B5	36	CBF6	0.890855	0.150644
B5	37	CBF6	1.01589	0.274734
B5	38	CBF6	1.19937	0.457281
B5	39	CBF6	1.42834	0.685309
B5	40	CBF6	1.67028	0.926305
B6	1	CBF6	0.659312	-0.00616793
B6	2	CBF6	0.661964	-0.00432384
B6	3	CBF6	0.66271	-0.00438633
B6	4	CBF6	0.664957	-0.0029469
B6	5	CBF6	0.666368	-0.00234438
B6	6	CBF6	0.66944	-8.08602e-05
B6	7	CBF6	0.668853	-0.00147539
B6	8	CBF6	0.671364	0.000226952
B6	9	CBF6	0.673751	0.00180603
B6	10	CBF6	0.6742	0.00144695
B6	11	CBF6	0.675944	0.00238278
B6	12	CBF6	0.676257	0.0018878
B6	13	CBF6	0.67836	0.00318245
B6	14	CBF6	0.677667	0.00168087
B6	15	CBF6	0.678089	0.00129515
B6	16	CBF6	0.678758	0.0011563
B6	17	CBF6	0.680481	0.00207085
B6	18	CBF6	0.680792	0.00157337
B6	19	CBF6	0.680974	0.00094732
B6	20	CBF6	0.682246	0.0014112
B6	21	CBF6	0.682538	0.000895776
B6	22	CBF6	0.682908	0.000457182
B6	23	CBF6	0.681913	-0.001346
B6	24	CBF6	0.683392	-0.000674756
B6	25	CBF6	0.682829	-0.00204575
B6	26	CBF6	0.683325	-0.00235887
B6	27	CBF6	0.684733	-0.00175814
B6	28	CBF6	0.684035	-0.00326479
B6	29	CBF6	0.68471	-0.00339803
B6	30	CBF6	0.686218	-0.0026977
B6	31	CBF6	0.690533	0.000808762
B6	32	CBF6	0.69608	0.00554814
B6	33	CBF6	0.705432	0.0140913
B6	34	CBF6	0.725317	0.0331689
B6	35	CBF6	0.763042	0.0700852
B6	36	CBF6	0.829878	0.136113
B6	37	CBF6	0.941824	0.247251
B6	38	CBF6	1.1118	0.416424
B6	39	CBF6	1.33085	0.634663
B6	40	CBF6	1.56475	0.86775
B7	1	CBF7	0.641473	-0.00967519
B7	2	CBF7	0.646668	-0.00585535
B7	3	CBF7	0.650237	-0.00366016
B7	4	CBF7	0.652671	-0.00260097
B7	5	CBF7	0.655371	-0.00127624
B7	6	CBF7	0.657872	-0.000148867
B7	7	CBF7	0.658962	-0.000433524
B7	8	CBF7	0.661119	0.000348921
B7	9	CBF7	0.663269	0.00112403
B7	10	CBF7	0.666017	0.00249722
B7	11	CBF7	0.666975	0.00208107
B7	12	CBF7	0.668508	0.00223916
B7	13	CBF7	0.670063	0.0024193
B7	14	CBF7	0.67054	0.00152161
B7	15	CBF7	0.671229	0.000835932
B7	16	CBF7	0.673295	0.00152825
B7	17	CBF7	0.674761	0.00161893
B7	18	CBF7	0.674656	0.000139197
B7	19	CBF7	0.675992	0.000100826
B7	20	CBF7	0.675714	-0.00155152
B7	21	CBF7	0.678463	-0.000176903
B7	22	CBF7	0.678415	-0.00159953
B7	23	CBF7	0.679814	-0.00157514
B7	24	CBF7	0.681129	-0.00163491
B7	25	CBF7	0.682338	-0.00180018
B7	26	CBF7	0.682114	-0.0033993
B7	27	CBF7	0.685493	-0.00139448
B7	28	CBF7	0.68858	0.000318155
B7	29	CBF7	0.694116	0.00447911
B7	30	CBF7	0.703293	0.0122812
B7	31	CBF7	0.720976	0.0285899
B7	32	CBF7	0.754882	0.0611209
B7	33	CBF7	0.815628	0.120493
B7	34	CBF7	0.922759	0.226249
B7	35	CBF7	1.09716	0.399276
B7	36	CBF7	1.3495	0.650244
B7	37	CBF7	1.66315	0.962513
B7	38	CBF7	1.96337	1.26136
B7	39	CBF7	2.2016	1.49822
B7	40	CBF7	2.37215	1.66739
B8	1	CBF7	0.672227	-0.00820131
B8	2	CBF7	0.676919	-0.00485189
B8	3	CBF7	0.679833	-0.00327977
B8	4	CBF7	0.682563	-0.00189338
B8	5	CBF7	0.683664	-0.00213461
B8	6	CBF7	0.68757	0.000428677
B8	7	CBF7	0.687687	-0.000797163
B8	8	CBF7	0.689389	-0.000437161
B8	9	CBF7	0.693054	0.00188497
B8	10	CBF7	0.693328	0.000816304
B8	11	CBF7	0.695401	0.00154693
B8	12	CBF7	0.698407	0.00320935
B8	13	CBF7	0.697203	0.000663565
B8	14	CBF7	0.699095	0.0012121
B8	15	CBF7	0.699701	0.000476087
B8	16	CBF7	0.70216	0.00159164
B8	17	CBF7	0.702361	0.000450079
B8	18	CBF7	0.704577	0.0013234
B8	19	CBF7	0.705512	0.000915749
B8	20	CBF7	0.706874	0.000935467
B8	21	CBF7	0.707834	0.000552318
B8	22	CBF7	0.708625	1.26286e-06
B8	23	CBF7	0.70866	-0.00130624
B8	24	CBF7	0.710741	-0.000568459
B8	25	CBF7	0.711791	-0.000861188
B8	26	CBF7	0.71203	-0.00196454
B8	27	CBF7	0.713701	-0.00163655
B8	28	CBF7	0.713702	-0.00297796
B8	29	CBF7	0.716672	-0.00135088
B8	30	CBF7	0.719002	-0.000363304
B8	31	CBF7	0.724271	0.00356332
B8	32	CBF7	0.734225	0.0121745
B8	33	CBF7	0.751706	0.0283132
B8	34	CBF7	0.7847	0.0599645
B8	35	CBF7	0.844969	0.11889
B8	36	CBF7	0.948847	0.221426
B8	37	CBF7	1.11856	0.389792
B8	38	CBF7	1.3653	0.635192
B8	39	CBF7	1.6736	0.942153
B8	40	CBF7	1.97664	1.24385
B9	1	CBF7	0.696406	-0.0081466
B9	2	CBF7	0.700086	-0.00574328
B9	3	CBF7	0.701635	-0.00546998
B9	4	CBF7	0.705027	-0.00335419
B9	5	CBF7	0.707207	-0.00245093
B9	6	CBF7	0.710153	-0.000781157
B9	7	CBF7	0.712907	0.000697225
B9	8	CBF7	0.714272	0.000785389
B9	9	CBF7	0.715813	0.0010501
B9	10	CBF7	0.718892	0.00285303
B9	11	CBF7	0.719953	0.00263793
B9	12	CBF7	0.72112	0.00252904
B9	13	CBF7	0.722364	0.0024965
B9	14	CBF7	0.723271	0.0021275
B9	15	CBF7	0.72445	0.00203035
B9	16	CBF7	0.725831	0.00213425
B9	17	CBF7	0.726025	0.00105261
B9	18	CBF7	0.727451	0.00120235
B9	19	CBF7	0.727829	0.000303756
B9	20	CBF7	0.728682	-0.000119726
B9	21	CBF7	0.728114	-0.00196335
B9	22	CBF7	0.730919	-0.000434541
B9	23	CBF7	0.731053	-0.00157721
B9	24	CBF7	0.733025	-0.000881023
B9	25	CBF7	0.7335	-0.00168305
B9	26	CBF7	0.733273	-0.00318544
B9	27	CBF7	0.736141	-0.00159375
B9	28	CBF7	0.740606	0.00159433
B9	29	CBF7	0.745307	0.00501976
B9	30	CBF7	0.756696	0.0151324
B9	31	CBF7	0.775564	0.0327244
B9	32	CBF7	0.813236	0.0691195
B9	33	CBF7	0.879494	0.134101
B9	34	CBF7	0.997288	0.25062
B9	35	CBF7	1.18515	0.437202
B9	36	CBF7	1.44881	0.699593
B9	37	CBF7	1.76433	1.01384
B9	38	CBF7	2.05332	1.30155
B9	39	CBF7	2.27302	1.51997
B9	40	CBF7	2.44046	1.68613
B10	1	CBF7	0.551423	-0.00781701
B10	2	CBF7	0.554183	-0.00551823
B10	3	CBF7	0.553998	-0.00616474
B10	4	CBF7	0.556796	-0.00382745
B10	5	CBF7	0.557147	-0.0039386
B10	6	CBF7	0.559114	-0.00243303
B10	7	CBF7	0.559986	-0.00202204
B10	8	CBF7	0.56098	-0.00148952
B10	9	CBF7	0.563717	0.000786443
B10	10	CBF7	0.563643	0.00025097
B10	11	CBF7	0.565205	0.00135218
B10	12	CBF7	0.565774	0.00145913
B10	13	CBF7	0.56708	0.00230446
B10	14	CBF7	0.566763	0.00152586
B10	15	CBF7	0.568157	0.00245856
B10	16	CBF7	0.569088	0.00292862
B10	17	CBF7	0.568237	0.00161567
B10	18	CBF7	0.570762	0.00367991
B10	19	CBF7	0.570449	0.00290536
B10	20	CBF7	0.570273	0.00226785
B10	21	CBF7	0.570251	0.00178447
B10	22	CBF7	0.570229	0.00130073
B10	23	CBF7	0.57154	0.00215113
B10	24	CBF7	0.571879	0.00202848
B10	25	CBF7	0.571154	0.000842657
B10	26	CBF7	0.572331	0.00155811
B10	27	CBF7	0.573234	0.00199991
B10	28	CBF7	0.572177	0.000481379
B10	29	CBF7	0.571403	-0.000753912
B10	30	CBF7	0.572825	0.000206752
B10	31	CBF7	0.572071	-0.00100833
B10	32	CBF7	0.573078	-0.000462578
B10	33	CBF7	0.57331	-0.00069216
B10	34	CBF7	0.573332	-0.00113203
B10	35	CBF7	0.573323	-0.00160152
B10	36	CBF7	0.574336	-0.00104992
B10	37	CBF7	0.572592	-0.00325587
B10	38	CBF7	0.573148	-0.00316109
B10	39	CBF7	0.573874	-0.00289583
B10	40	CBF7	0.573624	-0.00360714
B11	1	CBF7	0.548153	-0.00615267
B11	2	CBF7	0.548283	-0.00669868
B11	3	CBF7	0.550567	-0.0050911
B11	4	CBF7	0.55303	-0.00330358
B11	5	CBF7	0.553965	-0.00304474
B11	6	CBF7	0.554528	-0.00315766
B11	7	CBF7	0.555028	-0.00333345
B11	8	CBF7	0.559738	0.000700028
B11	9	CBF7	0.560183	0.000468977
B11	10	CBF7	0.561588	0.00119863
B11	11	CBF7	0.562369	0.00130334
B11	12	CBF7	0.562544	0.000802812
B11	13	CBF7	0.564894	0.00247685
B11	14	CBF7	0.565364	0.00227035
B11	15	CBF7	0.565903	0.00213336
B11	16	CBF7	0.567973	0.00352766
B11	17	CBF7	0.56734	0.00221896
B11	18	CBF7	0.56707	0.00127301
B11	19	CBF7	0.568118	0.0016454
B11	20	CBF7	0.569492	0.00234305
B11	21	CBF7	0.568481	0.000655796
B11	22	CBF7	0.568633	0.000131908
B11	23	CBF7	0.571172	0.0019953
B11	24	CBF7	0.571349	0.00149669
B11	25	CBF7	0.571324	0.000794999
B11	26	CBF7	0.571781	0.000576763
B11	27	CBF7	0.570997	-0.000883872
B11	28	CBF7	0.574286	0.00172989
B11	29	CBF7	0.573615	0.000382501
B11	30	CBF7	0.57419	0.000282103
B11	31	CBF7	0.574161	-0.000422924
B11	32	CBF7	0.57532	6.00889e-05
B11	33	CBF7	0.575296	-0.000639753
B11	34	CBF7	0.576349	-0.000262777
B11	35	CBF7	0.575789	-0.00149894
B11	36	CBF7	0.576929	-0.00103494
B11	37	CBF7	0.576439	-0.00220125
B11	38	CBF7	0.577228	-0.00208814
B11	39	CBF7	0.576487	-0.00350533
B11	40	CBF7	0.577995	-0.00267291
B12	1	CBF7	0.717294	-0.00930703
B12	2	CBF7	0.72005	-0.00731359
B12	3	CBF7	0.721058	-0.00706912
B12	4	CBF7	0.722492	-0.00639841
B12	5	CBF7	0.726042	-0.00361217
B12	6	CBF7	0.728121	-0.00229624
B12	7	CBF7	0.729837	-0.00134284
B12	8	CBF7	0.731054	-0.000889155
B12	9	CBF7	0.732351	-0.000356021
B12	10	CBF7	0.735057	0.00158736
B12	11	CBF7	0.735972	0.00173855
B12	12	CBF7	0.738034	0.00303712
B12	13	CBF7	0.73847	0.00270998
B12	14	CBF7	0.739106	0.00258288
B12	15	CBF7	0.740484	0.00319761
B12	16	CBF7	0.742725	0.00467524
B12	17	CBF7	0.74137	0.0025568
B12	18	CBF7	0.742732	0.00315598
B12	19	CBF7	0.743026	0.00268609
B12	20	CBF7	0.743315	0.00221178
B12	21	CBF7	0.743716	0.00184995
B12	22	CBF7	0.744911	0.002282
B12	23	CBF7	0.7449	0.00150705
B12	24	CBF7	0.745726	0.00157068
B12	25	CBF7	0.746332	0.00141317
B12	26	CBF7	0.746044	0.00036154
B12	27	CBF7	0.746786	0.000340053
B12	28	CBF7	0.747897	0.000688174
B12	29	CBF7	0.747684	-0.000287702
B12	30	CBF7	0.746859	-0.00187667
B12	31	CBF7	0.746643	-0.00285601
B12	32	CBF7	0.747793	-0.00246849
B12	33	CBF7	0.747296	-0.00372885
B12	34	CBF7	0.750507	-0.00128098
B12	35	CBF7	0.750421	-0.0021305
B12	36	CBF7	0.750526	-0.0027885
B12	37	CBF7	0.751144	-0.0029345
B12	38	CBF7	0.754316	-0.000525311
B12	39	CBF7	0.758294	0.00268944
B12	40	CBF7	0.767417	0.0110489
C1	1	CBF6	0.643559	0.000280945
C1	2	CBF6	0.642128	-0.00121058
C1	3	CBF6	0.641826	-0.001572
C1	4	CBF6	0.641071	-0.00238708
C1	5	CBF6	0.643912	0.000393204
C1	6	CBF6	0.643969	0.000390066
C1	7	CBF6	0.643859	0.000220034
C1	8	CBF6	0.642993	-0.000705903
C1	9	CBF6	0.643979	0.000220016
C1	10	CBF6	0.644404	0.0005844
C1	11	CBF6	0.645621	0.0017417
C1	12	CBF6	0.645655	0.00171568
C1	13	CBF6	0.645936	0.00193641
C1	14	CBF6	0.644286	0.000226438
C1	15	CBF6	0.644987	0.000867149
C1	16	CBF6	0.645742	0.00156198
C1	17	CBF6	0.644119	-0.000121233
C1	18	CBF6	0.643911	-0.000388718
C1	19	CBF6	0.642994	-0.00136663
C1	20	CBF6	0.644021	-0.000399048
C1	21	CBF6	0.643073	-0.00140742
C1	22	CBF6	0.642316	-0.00222458
C1	23	CBF6	0.643009	-0.00159132
C1	24	CBF6	0.644079	-0.00058207
C1	25	CBF6	0.64761	0.00288891
C1	26	CBF6	0.654288	0.00950725
C1	27	CBF6	0.66632	0.0214785
C1	28	CBF6	0.68833	0.0434286
C1	29	CBF6	0.733376	0.0884141
C1	30	CBF6	0.810854	0.165832
C1	31	CBF6	0.937298	0.292217
C1	32	CBF6	1.11919	0.474045
C1	33	CBF6	1.32753	0.682329
C1	34	CBF6	1.53288	0.887621
C1	35	CBF6	1.69751	1.05218
C1	36	CBF6	1.83959	1.19421
C1	37	CBF6	1.95775	1.31231
C1	38	CBF6	2.05376	1.40826
C1	39	CBF6	2.13417	1.48861
C1	40	CBF6	2.20038	1.55476
C2	1	CBF6	0.691621	-0.00197241
C2	2	CBF6	0.692944	-0.00200014
C2	3	CBF6	0.692802	-0.00349361
C2	4	CBF6	0.695065	-0.00258155
C2	5	CBF6	0.69964	0.000642028
C2	6	CBF6	0.699873	-0.000475932
C2	7	CBF6	0.701142	-0.000557964
C2	8	CBF6	0.704493	0.00144194
C2	9	CBF6	0.706878	0.00247529
C2	10	CBF6	0.707174	0.00142086
C2	11	CBF6	0.709018	0.00191366
C2	12	CBF6	0.709176	0.000720717
C2	13	CBF6	0.711416	0.00160947
C2	14	CBF6	0.7117	0.00054211
C2	15	CBF6	0.713076	0.000566413
C2	16	CBF6	0.715199	0.00133911
C2	17	CBF6	0.714718	-0.000493388
C2	18	CBF6	0.716478	-8.4218e-05
C2	19	CBF6	0.715981	-0.00193222
C2	20	CBF6	0.71874	-0.000525323
C2	21	CBF6	0.720492	-0.000123902
C2	22	CBF6	0.719951	-0.00201595
C2	23	CBF6	0.721739	-0.00157882
C2	24	CBF6	0.725861	0.00119129
C2	25	CBF6	0.730066	0.00404514
C2	26	CBF6	0.740249	0.0128769
C2	27	CBF6	0.759342	0.0306192
C2	28	CBF6	0.793889	0.0638154
C2	29	CBF6	0.85946	0.128035
C2	30	CBF6	0.970765	0.237989
C2	31	CBF6	1.14958	0.415456
C2	32	CBF6	1.40475	0.669272
C2	33	CBF6	1.68968	0.952847
C2	34	CBF6	1.97387	1.23569
C2	35	CBF6	2.19985	1.46032
C2	36	CBF6	2.39052	1.64964
C2	37	CBF6	2.54948	1.80724
C2	38	CBF6	2.6717	1.92812
C2	39	CBF6	2.77282	2.02789
C2	40	CBF6	2.86237	2.11608
C3	1	CBF6	0.715854	-0.00143587
C3	2	CBF6	0.715322	-0.00341724
C3	3	CBF6	0.717798	-0.00239067
C3	4	CBF6	0.719798	-0.00183987
C3	5	CBF6	0.722074	-0.00101232
C3	6	CBF6	0.723525	-0.00101154
C3	7	CBF6	0.727385	0.00139947
C3	8	CBF6	0.728674	0.00123949
C3	9	CBF6	0.728967	8.2978e-05
C3	10	CBF6	0.730993	0.00066007
C3	11	CBF6	0.733038	0.001256
C3	12	CBF6	0.735096	0.00186468
C3	13	CBF6	0.736737	0.00205607
C3	14	CBF6	0.736521	0.000390895
C3	15	CBF6	0.739835	0.00225545
C3	16	CBF6	0.73859	-0.000439219
C3	17	CBF6	0.741635	0.00115705
C3	18	CBF6	0.742212	0.000284918
C3	19	CBF6	0.742047	-0.00132971
C3	20	CBF6	0.744099	-0.000726872
C3	21	CBF6	0.74424	-0.00203537
C3	22	CBF6	0.746691	-0.0010339
C3	23	CBF6	0.746791	-0.00238305
C3	24	CBF6	0.750803	0.000179357
C3	25	CBF6	0.753449	0.0013761
C3	26	CBF6	0.761731	0.00820953
C3	27	CBF6	0.775502	0.0205311
C3	28	CBF6	0.803934	0.047514
C3	29	CBF6	0.853355	0.095485
C3	30	CBF6	0.942941	0.183622
C3	31	CBF6	1.09316	0.33239
C3	32	CBF6	1.31046	0.548242
C3	33	CBF6	1.57922	0.815555
C3	34	CBF6	1.86513	1.10002
C3	35	CBF6	2.09355	1.32698
C3	36	CBF6	2.28246	1.51445
C3	37	CBF6	2.43737	1.66791
C3	38	CBF6	2.56905	1.79813
C3	39	CBF6	2.67628	1.90392
C3	40	CBF6	2.76015	1.98634
C4	1	CBF6	0.639155	-0.00186027
C4	2	CBF6	0.639061	-0.00261895
C4	3	CBF6	0.640015	-0.00232907
C4	4	CBF6	0.640805	-0.00220364
C4	5	CBF6	0.641144	-0.00252893
C4	6	CBF6	0.643221	-0.00111598
C4	7	CBF6	0.644593	-0.000408865
C4	8	CBF6	0.644897	-0.000769448
C4	9	CBF6	0.646992	0.000661626
C4	10	CBF6	0.647431	0.00043569
C4	11	CBF6	0.649798	0.00213802
C4	12	CBF6	0.649005	0.000681252
C4	13	CBF6	0.650686	0.00169783
C4	14	CBF6	0.651408	0.00175526
C4	15	CBF6	0.651322	0.00100486
C4	16	CBF6	0.654376	0.00339402
C4	17	CBF6	0.654307	0.00266067
C4	18	CBF6	0.653361	0.00105006
C4	19	CBF6	0.654076	0.00110104
C4	20	CBF6	0.65476	0.00111979
C4	21	CBF6	0.655151	0.000846643
C4	22	CBF6	0.654359	-0.000609831
C4	23	CBF6	0.655375	-0.000258138
C4	24	CBF6	0.656855	0.000557875
C4	25	CBF6	0.655667	-0.00129491
C4	26	CBF6	0.655269	-0.0023571
C4	27	CBF6	0.656117	-0.00217367
C4	28	CBF6	0.656385	-0.00257073
C4	29	CBF6	0.656799	-0.00282051
C4	30	CBF6	0.659715	-0.000569456
C4	31	CBF6	0.663854	0.00290564
C4	32	CBF6	0.670211	0.00859779
C4	33	CBF6	0.684348	0.0220707
C4	34	CBF6	0.71307	0.0501276
C4	35	CBF6	0.761431	0.0978246
C4	36	CBF6	0.844819	0.180548
C4	37	CBF6	0.970398	0.305462
C4	38	CBF6	1.13625	0.470647
C4	39	CBF6	1.31371	0.647444
C4	40	CBF6	1.4798	0.812875
C5	1	CBF6	0.623453	-0.00777063
C5	2	CBF6	0.626786	-0.00547115
C5	3	CBF6	0.628875	-0.00441573
C5	4	CBF6	0.631691	-0.0026345
C5	5	CBF6	0.633875	-0.00148372
C5	6	CBF6	0.635379	-0.00101356
C5	7	CBF6	0.636311	-0.00111596
C5	8	CBF6	0.63833	-0.000129917
C5	9	CBF6	0.640579	0.00108488
C5	10	CBF6	0.641907	0.00137885
C5	11	CBF6	0.643662	0.00210049
C5	12	CBF6	0.644039	0.00144346
C5	13	CBF6	0.645869	0.00223942
C5	14	CBF6	0.647453	0.00278946
C5	15	CBF6	0.647111	0.00141384
C5	16	CBF6	0.649499	0.00276824
C5	17	CBF6	0.649916	0.00215079
C5	18	CBF6	0.650531	0.00173195
C5	19	CBF6	0.650646	0.000813619
C5	20	CBF6	0.651869	0.00100292
C5	21	CBF6	0.651272	-0.000628397
C5	22	CBF6	0.652568	-0.000366077
C5	23	CBF6	0.653515	-0.000453279
C5	24	CBF6	0.653736	-0.00126635
C5	25	CBF6	0.654482	-0.0015537
C5	26	CBF6	0.655329	-0.0017408
C5	27	CBF6	0.654599	-0.00350414
C5	28	CBF6	0.657511	-0.00162642
C5	29	CBF6	0.65905	-0.00112109
C5	30	CBF6	0.663341	0.0021357
C5	31	CBF6	0.67155	0.00931157
C5	32	CBF6	0.683745	0.0204725
C5	33	CBF6	0.709682	0.0453753
C5	34	CBF6	0.758196	0.0928552
C5	35	CBF6	0.841141	0.174767
C5	36	CBF6	0.972855	0.305447
C5	37	CBF6	1.1521	0.483658
C5	38	CBF6	1.36209	0.692609
C5	39	CBF6	1.56421	0.893701
C5	40	CBF6	1.74034	1.0688
C6	1	CBF6	0.621963	-0.00646438
C6	2	CBF6	0.624087	-0.00523785
C6	3	CBF6	0.626734	-0.00348858
C6	4	CBF6	0.62836	-0.00276046
C6	5	CBF6	0.630449	-0.00156921
C6	6	CBF6	0.632505	-0.00041098
C6	7	CBF6	0.633575	-0.000238612
C6	8	CBF6	0.634556	-0.000155771
C6	9	CBF6	0.636508	0.000898626
C6	10	CBF6	0.638445	0.0019383
C6	11	CBF6	0.638513	0.00110812
C6	12	CBF6	0.640032	0.00172991
C6	13	CBF6	0.641172	0.00197189
C6	14	CBF6	0.641217	0.00111912
C6	15	CBF6	0.642913	0.00191716
C6	16	CBF6	0.643773	0.00188019
C6	17	CBF6	0.644608	0.0018176
C6	18	CBF6	0.643714	2.58738e-05
C6	19	CBF6	0.64541	0.000823971
C6	20	CBF6	0.6463	0.000816273
C6	21	CBF6	0.646388	5.93891e-06
C6	22	CBF6	0.647619	0.000339597
C6	23	CBF6	0.647618	-0.000559131
C6	24	CBF6	0.649048	-2.6513e-05
C6	25	CBF6	0.648197	-0.00177598
C6	26	CBF6	0.64897	-0.00190014
C6	27	CBF6	0.650108	-0.00165959
C6	28	CBF6	0.650077	-0.0025886
C6	29	CBF6	0.651402	-0.002161
C6	30	CBF6	0.653932	-0.000528974
C6	31	CBF6	0.65879	0.00343097
C6	32	CBF6	0.667268	0.0110109
C6	33	CBF6	0.684501	0.0273464
C6	34	CBF6	0.716123	0.0580705
C6	35	CBF6	0.774575	0.115625
C6	36	CBF6	0.871985	0.212138
C6	37	CBF6	1.01951	0.358766
C6	38	CBF6	1.21377	0.552128
C6	39	CBF6	1.43032	0.767775
C6	40	CBF6	1.62642	0.962983
C7	1	CBF7	0.581935	-0.00413532
C7	2	CBF7	0.582339	-0.00440294
C7	3	CBF7	0.583773	-0.00363928
C7	4	CBF7	0.586471	-0.00161295
C7	5	CBF7	0.587862	-0.000892381
C7	6	CBF7	0.58894	-0.000485809
C7	7	CBF7	0.590599	0.000502087
C7	8	CBF7	0.591373	0.000605093
C7	9	CBF7	0.592246	0.000807399
C7	10	CBF7	0.593645	0.00153452
C7	11	CBF7	0.595214	0.00243284
C7	12	CBF7	0.595112	0.00165941
C7	13	CBF7	0.595216	0.0010927
C7	14	CBF7	0.596588	0.0017936
C7	15	CBF7	0.596727	0.00126164
C7	16	CBF7	0.596271	0.000134702
C7	17	CBF7	0.597642	0.000833992
C7	18	CBF7	0.597467	-1.17895e-05
C7	19	CBF7	0.597653	-0.000496486
C7	20	CBF7	0.598137	-0.000683755
C7	21	CBF7	0.598467	-0.00102528
C7	22	CBF7	0.599229	-0.000934495
C7	23	CBF7	0.599488	-0.00134653
C7	24	CBF7	0.599682	-0.00182342
C7	25	CBF7	0.600824	-0.00135266
C7	26	CBF7	0.602695	-0.000152865
C7	27	CBF7	0.603445	-7.35225e-05
C7	28	CBF7	0.606063	0.00187323
C7	29	CBF7	0.612154	0.00729369
C7	30	CBF7	0.624855	0.0193237
C7	31	CBF7	0.645981	0.0397784
C7	32	CBF7	0.687676	0.0808021
C7	33	CBF7	0.761302	0.153757
C7	34	CBF7	0.881307	0.273091
C7	35	CBF7	1.05792	0.449036
C7	36	CBF7	1.28046	0.6709
C7	37	CBF7	1.50155	0.891323
C7	38	CBF7	1.6822	1.0713
C7	39	CBF7	1.82243	1.21086
C7	40	CBF7	1.93777	1.32552
C8	1	CBF7	0.671728	-0.0058599
C8	2	CBF7	0.67566	-0.00322747
C8	3	CBF7	0.67712	-0.00306732
C8	4	CBF7	0.678708	-0.00277908
C8	5	CBF7	0.681612	-0.00117436
C8	6	CBF7	0.683001	-0.0010858
C8	7	CBF7	0.685187	-0.00019877
C8	8	CBF7	0.687625	0.000939013
C8	9	CBF7	0.689521	0.00153564
C8	10	CBF7	0.690976	0.00169085
C8	11	CBF7	0.692854	0.00226966
C8	12	CBF7	0.693345	0.00146057
C8	13	CBF7	0.696235	0.00305129
C8	14	CBF7	0.695555	0.00107145
C8	15	CBF7	0.696644	0.00086068
C8	16	CBF7	0.698636	0.00155322
C8	17	CBF7	0.699369	0.0009872
C8	18	CBF7	0.699788	0.000105757
C8	19	CBF7	0.699765	-0.00121652
C8	20	CBF7	0.702333	5.17941e-05
C8	21	CBF7	0.701916	-0.00166471
C8	22	CBF7	0.704402	-0.000478231
C8	23	CBF7	0.704381	-0.00179908
C8	24	CBF7	0.707166	-0.0003141
C8	25	CBF7	0.706445	-0.00233441
C8	26	CBF7	0.709111	-0.000968162
C8	27	CBF7	0.71122	-0.000158801
C8	28	CBF7	0.71434	0.00166223
C8	29	CBF7	0.718701	0.0047234
C8	30	CBF7	0.731777	0.0164996
C8	31	CBF7	0.752657	0.0360796
C8	32	CBF7	0.79363	0.0757528
C8	33	CBF7	0.863953	0.144777
C8	34	CBF7	0.985422	0.264946
C8	35	CBF7	1.17203	0.450253
C8	36	CBF7	1.41714	0.694061
C8	37	CBF7	1.6889	0.964521
C8	38	CBF7	1.91029	1.18461
C8	39	CBF7	2.08325	1.35627
C8	40	CBF7	2.22514	1.49687
C9	1	CBF7	0.640754	-0.00845648
C9	2	CBF7	0.645948	-0.00458873
C9	3	CBF7	0.647989	-0.00387353
C9	4	CBF7	0.65079	-0.00239944
C9	5	CBF7	0.653863	-0.000652779
C9	6	CBF7	0.655069	-0.000772816
C9	7	CBF7	0.657242	7.31596e-05
C9	8	CBF7	0.659022	0.000526937
C9	9	CBF7	0.661434	0.0016124
C9	10	CBF7	0.662727	0.00157987
C9	11	CBF7	0.664324	0.00185054
C9	12	CBF7	0.665911	0.00211042
C9	13	CBF7	0.667112	0.00198514
C9	14	CBF7	0.667246	0.000792874
C9	15	CBF7	0.668007	0.000227352
C9	16	CBF7	0.671303	0.00219711
C9	17	CBF7	0.671369	0.000936839
C9	18	CBF7	0.672201	0.000442008
C9	19	CBF7	0.673107	2.16236e-05
C9	20	CBF7	0.673647	-0.000764734
C9	21	CBF7	0.674539	-0.00119895
C9	22	CBF7	0.675871	-0.00119316
C9	23	CBF7	0.677186	-0.00120489
C9	24	CBF7	0.679148	-0.000569263
C9	25	CBF7	0.680348	-0.000695201
C9	26	CBF7	0.681217	-0.00115296
C9	27	CBF7	0.683007	-0.000689226
C9	28	CBF7	0.685833	0.000810672
C9	29	CBF7	0.691363	0.00501453
C9	30	CBF7	0.702093	0.0144177
C9	31	CBF7	0.720842	0.0318403
C9	32	CBF7	0.753682	0.0633539
C9	33	CBF7	0.815486	0.123832
C9	34	CBF7	0.923623	0.230642
C9	35	CBF7	1.09372	0.399415
C9	36	CBF7	1.33118	0.635546
C9	37	CBF7	1.60845	0.91149
C9	38	CBF7	1.86093	1.16265
C9	39	CBF7	2.05466	1.35505
C9	40	CBF7	2.20501	1.50408
C10	1	CBF7	0.561951	-0.00748764
C10	2	CBF7	0.563901	-0.00585416
C10	3	CBF7	0.565154	-0.00491753
C10	4	CBF7	0.56657	-0.00381913
C10	5	CBF7	0.568047	-0.00265838
C10	6	CBF7	0.56788	-0.00314183
C10	7	CBF7	0.570667	-0.000672048
C10	8	CBF7	0.571274	-0.00038135
C10	9	CBF7	0.570901	-0.00107127
C10	10	CBF7	0.573079	0.000789893
C10	11	CBF7	0.573632	0.00102653
C10	12	CBF7	0.573837	0.000915134
C10	13	CBF7	0.575476	0.00223717
C10	14	CBF7	0.575121	0.00156591
C10	15	CBF7	0.575764	0.00189201
C10	16	CBF7	0.576081	0.00189208
C10	17	CBF7	0.575672	0.00116705
C10	18	CBF7	0.577229	0.00240743
C10	19	CBF7	0.577627	0.00248862
C10	20	CBF7	0.577039	0.00158406
C10	21	CBF7	0.577291	0.00151928
C10	22	CBF7	0.578543	0.00245377
C10	23	CBF7	0.578953	0.00254795
C10	24	CBF7	0.578161	0.00143847
C10	25	CBF7	0.578819	0.00178055
C10	26	CBF7	0.578534	0.00117831
C10	27	CBF7	0.578018	0.000346177
C10	28	CBF7	0.578773	0.00078392
C10	29	CBF7	0.578041	-0.000264222
C10	30	CBF7	0.578331	-0.000291098
C10	31	CBF7	0.578579	-0.000360233
C10	32	CBF7	0.578764	-0.000491536
C10	33	CBF7	0.579364	-0.000208528
C10	34	CBF7	0.579414	-0.000474418
C10	35	CBF7	0.579265	-0.000940163
C10	36	CBF7	0.578553	-0.00196923
C10	37	CBF7	0.578353	-0.00248588
C10	38	CBF7	0.578107	-0.00304818
C10	39	CBF7	0.578653	-0.00281929
C10	40	CBF7	0.579471	-0.00231772
C11	1	CBF7	0.552089	-0.00742507
C11	2	CBF7	0.553254	-0.00670764
C11	3	CBF7	0.554775	-0.00563551
C11	4	CBF7	0.557526	-0.00333349
C11	5	CBF7	0.559124	-0.00218393
C11	6	CBF7	0.560192	-0.00156349
C11	7	CBF7	0.559884	-0.0023205
C11	8	CBF7	0.563248	0.000595324
C11	9	CBF7	0.564216	0.00111445
C11	10	CBF7	0.563592	4.26593e-05
C11	11	CBF7	0.565526	0.00152839
C11	12	CBF7	0.565257	0.000810058
C11	13	CBF7	0.565858	0.000963088
C11	14	CBF7	0.567393	0.00204971
C11	15	CBF7	0.567479	0.00168704
C11	16	CBF7	0.568698	0.00245781
C11	17	CBF7	0.56767	0.000981008
C11	18	CBF7	0.569126	0.00198889
C11	19	CBF7	0.570619	0.00303324
C11	20	CBF7	0.569043	0.00100862
C11	21	CBF7	0.569902	0.00141914
C11	22	CBF7	0.569531	0.00059966
C11	23	CBF7	0.570982	0.00160271
C11	24	CBF7	0.571599	0.00177112
C11	25	CBF7	0.571549	0.00127255
C11	26	CBF7	0.571697	0.000972644
C11	27	CBF7	0.572919	0.00174604
C11	28	CBF7	0.571711	8.89949e-05
C11	29	CBF7	0.571223	-0.000847489
C11	30	CBF7	0.572046	-0.000472134
C11	31	CBF7	0.571592	-0.001375
C11	32	CBF7	0.572386	-0.00102897
C11	33	CBF7	0.572248	-0.00161575
C11	34	CBF7	0.573727	-0.000585643
C11	35	CBF7	0.573319	-0.00144148
C11	36	CBF7	0.574368	-0.000841536
C11	37	CBF7	0.575362	-0.000295891
C11	38	CBF7	0.573582	-0.00252377
C11	39	CBF7	0.574886	-0.00166854
C11	40	CBF7	0.57727	0.000267149
C12	1	CBF7	0.720198	-0.0045472
C12	2	CBF7	0.719893	-0.00548807
C12	3	CBF7	0.722701	-0.00331651
C12	4	CBF7	0.722922	-0.00373179
C12	5	CBF7	0.725411	-0.00187851
C12	6	CBF7	0.72763	-0.000295247
C12	7	CBF7	0.728742	0.000180325
C12	8	CBF7	0.729368	0.000170238
C12	9	CBF7	0.730424	0.000590914
C12	10	CBF7	0.731786	0.00131647
C12	11	CBF7	0.734447	0.0033414
C12	12	CBF7	0.733195	0.00145347
C12	13	CBF7	0.735197	0.00281906
C12	14	CBF7	0.734746	0.00173275
C12	15	CBF7	0.733153	-0.000496773
C12	16	CBF7	0.735983	0.0016978
C12	17	CBF7	0.736299	0.00137747
C12	18	CBF7	0.736668	0.00111066
C12	19	CBF7	0.737115	0.000921226
C12	20	CBF7	0.737399	0.000569724
C12	21	CBF7	0.737435	-3.0389e-05
C12	22	CBF7	0.737254	-0.000847523
C12	23	CBF7	0.738608	-0.000129837
C12	24	CBF7	0.740292	0.000918119
C12	25	CBF7	0.737273	-0.00273655
C12	26	CBF7	0.739145	-0.0015009
C12	27	CBF7	0.739076	-0.00220515
C12	28	CBF7	0.74135	-0.000567164
C12	29	CBF7	0.740213	-0.00234006
C12	30	CBF7	0.742605	-0.000584179
C12	31	CBF7	0.746286	0.00246095
C12	32	CBF7	0.752453	0.00799123
C12	33	CBF7	0.763582	0.018485
C12	34	CBF7	0.787226	0.0414925
C12	35	CBF7	0.82676	0.0803902
C12	36	CBF7	0.899775	0.152769
C12	37	CBF7	1.01795	0.270304
C12	38	CBF7	1.18364	0.435361
C12	39	CBF7	1.37755	0.628641
C12	40	CBF7	1.55952	0.809975
D1	1	CBF6	0.669576	-0.0169175
D1	2	CBF6	0.668979	-0.0203194
D1	3	CBF6	0.670576	-0.0215274
D1	4	CBF6	0.671552	-0.023356
D1	5	CBF6	0.702395	0.00468296
D1	6	CBF6	0.704408	0.00389082
D1	7	CBF6	0.708204	0.00488283
D1	8	CBF6	0.711199	0.0050728
D1	9	CBF6	0.715576	0.0066456
D1	10	CBF6	0.718846	0.00711101
D1	11	CBF6	0.720105	0.00556529
D1	12	CBF6	0.723869	0.00652506
D1	13	CBF6	0.725277	0.00512782
D1	14	CBF6	0.728618	0.00566493
D1	15	CBF6	0.730892	0.00513398
D1	16	CBF6	0.73313	0.00456769
D1	17	CBF6	0.734503	0.00313594
D1	18	CBF6	0.736418	0.00224599
D1	19	CBF6	0.738486	0.00150994
D1	20	CBF6	0.739428	-0.000352571
D1	21	CBF6	0.739823	-0.0027622
D1	22	CBF6	0.743105	-0.00228463
D1	23	CBF6	0.745038	-0.00315616
D1	24	CBF6	0.745884	-0.00511523
D1	25	CBF6	0.748922	-0.00488157
D1	26	CBF6	0.751514	-0.00509423
D1	27	CBF6	0.75618	-0.00323259
D1	28	CBF6	0.764569	0.00235125
D1	29	CBF6	0.781875	0.0168528
D1	30	CBF6	0.813599	0.0457724
D1	31	CBF6	0.87164	0.101009
D1	32	CBF6	0.97124	0.197805
D1	33	CBF6	1.13309	0.356847
D1	34	CBF6	1.36571	0.586668
D1	35	CBF6	1.64392	0.862071
D1	36	CBF6	1.92716	1.14251
D1	37	CBF6	2.15771	1.37025
D1	38	CBF6	2.34089	1.55062
D1	39	CBF6	2.5011	1.70803
D1	40	CBF6	2.62081	1.82494
D2	1	CBF6	0.734072	0.000961
D2	2	CBF6	0.732511	-0.00182938
D2	3	CBF6	0.735348	-0.000220939
D2	4	CBF6	0.735199	-0.00159803
D2	5	CBF6	0.737157	-0.000869417
D2	6	CBF6	0.73771	-0.00154449
D2	7	CBF6	0.739856	-0.000627878
D2	8	CBF6	0.741631	-8.06372e-05
D2	9	CBF6	0.743585	0.000643927
D2	10	CBF6	0.744749	0.000579386
D2	11	CBF6	0.746518	0.00112007
D2	12	CBF6	0.749161	0.00253456
D2	13	CBF6	0.749983	0.00212723
D2	14	CBF6	0.750678	0.00159336
D2	15	CBF6	0.750333	2.0287e-05
D2	16	CBF6	0.752986	0.00144449
D2	17	CBF6	0.753286	0.00051604
D2	18	CBF6	0.754044	4.49351e-05
D2	19	CBF6	0.75545	0.00022221
D2	20	CBF6	0.755845	-0.000611172
D2	21	CBF6	0.756048	-0.00163714
D2	22	CBF6	0.756408	-0.00250521
D2	23	CBF6	0.757834	-0.00230826
D2	24	CBF6	0.760252	-0.0011186
D2	25	CBF6	0.760497	-0.00210231
D2	26	CBF6	0.763607	-0.000221056
D2	27	CBF6	0.769656	0.00459865
D2	28	CBF6	0.779489	0.0132028
D2	29	CBF6	0.800123	0.0326091
D2	30	CBF6	0.836876	0.0681325
D2	31	CBF6	0.904717	0.134745
D2	32	CBF6	1.02167	0.250474
D2	33	CBF6	1.20602	0.433595
D2	34	CBF6	1.45525	0.68159
D2	35	CBF6	1.73762	0.962734
D2	36	CBF6	1.99433	1.21821
D2	37	CBF6	2.19953	1.42219
D2	38	CBF6	2.37154	1.59296
D2	39	CBF6	2.51483	1.73502
D2	40	CBF6	2.63114	1.85011
D3	1	CBF6	0.754143	-0.00143575
D3	2	CBF6	0.755366	-0.0011839
D3	3	CBF6	0.754077	-0.00344367
D3	4	CBF6	0.755948	-0.00254333
D3	5	CBF6	0.757644	-0.00181839
D3	6	CBF6	0.759279	-0.00115432
D3	7	CBF6	0.761653	0.00024969
D3	8	CBF6	0.762866	0.000491527
D3	9	CBF6	0.765091	0.00174563
D3	10	CBF6	0.765679	0.00136269
D3	11	CBF6	0.767714	0.00242707
D3	12	CBF6	0.769066	0.00280838
D3	13	CBF6	0.767491	0.000262747
D3	14	CBF6	0.770197	0.00199798
D3	15	CBF6	0.770066	0.000895848
D3	16	CBF6	0.772485	0.0023448
D3	17	CBF6	0.772574	0.00146267
D3	18	CBF6	0.772731	0.000648669
D3	19	CBF6	0.77303	-2.28759e-05
D3	20	CBF6	0.774605	0.000581238
D3	21	CBF6	0.773678	-0.00131667
D3	22	CBF6	0.774439	-0.00152587
D3	23	CBF6	0.77468	-0.00225564
D3	24	CBF6	0.776374	-0.00153268
D3	25	CBF6	0.776383	-0.00249456
D3	26	CBF6	0.778953	-0.000895107
D3	27	CBF6	0.782543	0.00172418
D3	28	CBF6	0.789728	0.00793822
D3	29	CBF6	0.804435	0.021675
D3	30	CBF6	0.831189	0.0474578
D3	31	CBF6	0.879953	0.0952514
D3	32	CBF6	0.96907	0.183397
D3	33	CBF6	1.11322	0.326575
D3	34	CBF6	1.32896	0.541342
D3	35	CBF6	1.59171	0.803124
D3	36	CBF6	1.85927	1.06971
D3	37	CBF6	2.07343	1.2829
D3	38	CBF6	2.24928	1.45778
D3	39	CBF6	2.39572	1.60325
D3	40	CBF6	2.51005	1.71661
D4	1	CBF6	0.723528	-0.00336541
D4	2	CBF6	0.724965	-0.00300826
D4	3	CBF6	0.72587	-0.00318207
D4	4	CBF6	0.727853	-0.00227918
D4	5	CBF6	0.730083	-0.00112828
D4	6	CBF6	0.731159	-0.00113203
D4	7	CBF6	0.732661	-0.000708544
D4	8	CBF6	0.734003	-0.000446165
D4	9	CBF6	0.735782	0.000253353
D4	10	CBF6	0.737283	0.000674221
D4	11	CBF6	0.739472	0.00178394
D4	12	CBF6	0.739532	0.000765175
D4	13	CBF6	0.741481	0.00163391
D4	14	CBF6	0.743514	0.00258747
D4	15	CBF6	0.744216	0.00221064
D4	16	CBF6	0.745192	0.00210747
D4	17	CBF6	0.74673	0.00256594
D4	18	CBF6	0.74667	0.00142618
D4	19	CBF6	0.747677	0.00135412
D4	20	CBF6	0.748529	0.00112655
D4	21	CBF6	0.748769	0.000286717
D4	22	CBF6	0.749129	-0.000432831
D4	23	CBF6	0.748697	-0.00194405
D4	24	CBF6	0.74955	-0.00217067
D4	25	CBF6	0.751513	-0.00128709
D4	26	CBF6	0.751741	-0.0021383
D4	27	CBF6	0.753032	-0.00192647
D4	28	CBF6	0.75847	0.00243194
D4	29	CBF6	0.76927	0.0121527
D4	30	CBF6	0.785275	0.0270774
D4	31	CBF6	0.818666	0.0593892
D4	32	CBF6	0.879752	0.119396
D4	33	CBF6	0.984171	0.222735
D4	34	CBF6	1.154	0.391481
D4	35	CBF6	1.38736	0.623769
D4	36	CBF6	1.65699	0.892317
D4	37	CBF6	1.9091	1.14334
D4	38	CBF6	2.11712	1.35028
D4	39	CBF6	2.28886	1.52095
D4	40	CBF6	2.43598	1.66699
D5	1	CBF6	0.689697	-0.00617238
D5	2	CBF6	0.692887	-0.00369962
D5	3	CBF6	0.693726	-0.00357796
D5	4	CBF6	0.695807	-0.00221415
D5	5	CBF6	0.696435	-0.00230397
D5	6	CBF6	0.69892	-0.00053627
D5	7	CBF6	0.699766	-0.000406807
D5	8	CBF6	0.70066	-0.000230374
D5	9	CBF6	0.702595	0.000987232
D5	10	CBF6	0.704459	0.00213474
D5	11	CBF6	0.705726	0.00268436
D5	12	CBF6	0.706272	0.00251258
D5	13	CBF6	0.70676	0.00228364
D5	14	CBF6	0.708686	0.00349273
D5	15	CBF6	0.706437	0.000526205
D5	16	CBF6	0.707654	0.00102575
D5	17	CBF6	0.708708	0.0013624
D5	18	CBF6	0.708795	0.000732206
D5	19	CBF6	0.709135	0.000354911
D5	20	CBF6	0.708263	-0.00123397
D5	21	CBF6	0.709401	-0.000813157
D5	22	CBF6	0.709161	-0.0017707
D5	23	CBF6	0.709965	-0.00168308
D5	24	CBF6	0.710925	-0.00144079
D5	25	CBF6	0.711048	-0.00203486
D5	26	CBF6	0.712296	-0.00150378
D5	27	CBF6	0.713701	-0.00081642
D5	28	CBF6	0.717704	0.00246953
D5	29	CBF6	0.72699	0.0110386
D5	30	CBF6	0.744442	0.0277725
D5	31	CBF6	0.775778	0.0583915
D5	32	CBF6	0.833153	0.11505
D5	33	CBF6	0.93351	0.214689
D5	34	CBF6	1.09155	0.372014
D5	35	CBF6	1.31053	0.590274
D5	36	CBF6	1.56132	0.840346
D5	37	CBF6	1.79036	1.06867
D5	38	CBF6	1.97943	1.25702
D5	39	CBF6	2.12929	1.40617
D5	40	CBF6	2.25232	1.52847
D6	1	CBF6	0.693446	-0.00431418
D6	2	CBF6	0.696218	-0.00249405
D6	3	CBF6	0.697158	-0.00250695
D6	4	CBF6	0.698906	-0.00171161
D6	5	CBF6	0.69908	-0.00248989
D6	6	CBF6	0.701491	-0.00103198
D6	7	CBF6	0.70343	-4.48303e-05
D6	8	CBF6	0.705433	0.0010052
D6	9	CBF6	0.706475	0.00109518
D6	10	CBF6	0.708076	0.00174318
D6	11	CBF6	0.708527	0.00124224
D6	12	CBF6	0.709837	0.00159902
D6	13	CBF6	0.711585	0.00239507
D6	14	CBF6	0.712178	0.00203522
D6	15	CBF6	0.712425	0.00132954
D6	16	CBF6	0.713651	0.00160393
D6	17	CBF6	0.714046	0.00104607
D6	18	CBF6	0.714922	0.000969696
D6	19	CBF6	0.715229	0.000323977
D6	20	CBF6	0.715821	-3.64144e-05
D6	21	CBF6	0.714833	-0.0019774
D6	22	CBF6	0.716024	-0.00173883
D6	23	CBF6	0.71658	-0.00213492
D6	24	CBF6	0.716791	-0.00287637
D6	25	CBF6	0.717417	-0.00320266
D6	26	CBF6	0.719728	-0.0018443
D6	27	CBF6	0.723171	0.000645428
D6	28	CBF6	0.72804	0.00456238
D6	29	CBF6	0.736934	0.0125041
D6	30	CBF6	0.756922	0.0315392
D6	31	CBF6	0.79346	0.067125
D6	32	CBF6	0.859486	0.132198
D6	33	CBF6	0.973311	0.245071
D6	34	CBF6	1.14694	0.417746
D6	35	CBF6	1.37611	0.64596
D6	36	CBF6	1.6217	0.890601
D6	37	CBF6	1.84094	1.10889
D6	38	CBF6	2.02062	1.28761
D6	39	CBF6	2.15529	1.42133
D6	40	CBF6	2.27265	1.53775
D7	1	CBF7	0.603327	-0.010176
D7	2	CBF7	0.608893	-0.00598967
D7	3	CBF7	0.611565	-0.00469732
D7	4	CBF7	0.614955	-0.00268649
D7	5	CBF7	0.616111	-0.00291013
D7	6	CBF7	0.619846	-0.000554845
D7	7	CBF7	0.622037	0.000256973
D7	8	CBF7	0.623724	0.000564297
D7	9	CBF7	0.62615	0.00161072
D7	10	CBF7	0.627328	0.00140944
D7	11	CBF7	0.629536	0.00223776
D7	12	CBF7	0.630649	0.00197145
D7	13	CBF7	0.631623	0.00156567
D7	14	CBF7	0.633733	0.0022969
D7	15	CBF7	0.63462	0.00180356
D7	16	CBF7	0.636282	0.00208674
D7	17	CBF7	0.637256	0.00168149
D7	18	CBF7	0.63827	0.00131558
D7	19	CBF7	0.639455	0.00112139
D7	20	CBF7	0.640236	0.000522545
D7	21	CBF7	0.640574	-0.000519341
D7	22	CBF7	0.642643	0.000170704
D7	23	CBF7	0.642363	-0.00148934
D7	24	CBF7	0.644384	-0.000847338
D7	25	CBF7	0.645011	-0.00160032
D7	26	CBF7	0.646447	-0.00154346
D7	27	CBF7	0.647156	-0.00221383
D7	28	CBF7	0.648368	-0.00238125
D7	29	CBF7	0.649642	-0.00248645
D7	30	CBF7	0.653269	-0.000239593
D7	31	CBF7	0.658442	0.00355448
D7	32	CBF7	0.66631	0.0100423
D7	33	CBF7	0.683019	0.0253719
D7	34	CBF7	0.715746	0.05672
D7	35	CBF7	0.771467	0.111061
D7	36	CBF7	0.871995	0.21021
D7	37	CBF7	1.03467	0.37151
D7	38	CBF7	1.26969	0.605145
D7	39	CBF7	1.55998	0.894054
D7	40	CBF7	1.84961	1.18231
D8	1	CBF7	0.664451	-0.00842818
D8	2	CBF7	0.668746	-0.00539234
D8	3	CBF7	0.671346	-0.00405017
D8	4	CBF7	0.673783	-0.00287215
D8	5	CBF7	0.675567	-0.00234697
D8	6	CBF7	0.677921	-0.00125103
D8	7	CBF7	0.679732	-0.000698437
D8	8	CBF7	0.681135	-0.000554199
D8	9	CBF7	0.68398	0.00103164
D8	10	CBF7	0.685233	0.00102639
D8	11	CBF7	0.687116	0.00165068
D8	12	CBF7	0.68812	0.00139658
D8	13	CBF7	0.690918	0.00293605
D8	14	CBF7	0.691444	0.00220309
D8	15	CBF7	0.692682	0.00218276
D8	16	CBF7	0.69325	0.00149247
D8	17	CBF7	0.69553	0.00251325
D8	18	CBF7	0.696135	0.00185963
D8	19	CBF7	0.697468	0.00193442
D8	20	CBF7	0.697378	0.000586163
D8	21	CBF7	0.698362	0.000311203
D8	22	CBF7	0.699108	-0.000201163
D8	23	CBF7	0.701085	0.000517306
D8	24	CBF7	0.701192	-0.000634141
D8	25	CBF7	0.701946	-0.0011384
D8	26	CBF7	0.703355	-0.000987903
D8	27	CBF7	0.70444	-0.00116201
D8	28	CBF7	0.704713	-0.00214764
D8	29	CBF7	0.70561	-0.00250903
D8	30	CBF7	0.708581	-0.000796411
D8	31	CBF7	0.710344	-0.000291982
D8	32	CBF7	0.716695	0.00479986
D8	33	CBF7	0.729456	0.0163029
D8	34	CBF7	0.750237	0.0358247
D8	35	CBF7	0.79061	0.07494
D8	36	CBF7	0.862475	0.145546
D8	37	CBF7	0.98235	0.264163
D8	38	CBF7	1.16724	0.447797
D8	39	CBF7	1.41163	0.690927
D8	40	CBF7	1.68239	0.960425
D9	1	CBF7	0.660918	-0.0120238
D9	2	CBF7	0.665004	-0.00890263
D9	3	CBF7	0.6692	-0.00567186
D9	4	CBF7	0.669964	-0.00587259
D9	5	CBF7	0.672416	-0.00438537
D9	6	CBF7	0.673759	-0.0040068
D9	7	CBF7	0.676384	-0.00234685
D9	8	CBF7	0.678277	-0.00141884
D9	9	CBF7	0.679676	-0.000984716
D9	10	CBF7	0.68337	0.00174425
D9	11	CBF7	0.683738	0.00114697
D9	12	CBF7	0.684463	0.000906845
D9	13	CBF7	0.687421	0.00290046
D9	14	CBF7	0.688201	0.00271512
D9	15	CBF7	0.690549	0.00409868
D9	16	CBF7	0.689898	0.00248312
D9	17	CBF7	0.689613	0.00123264
D9	18	CBF7	0.692357	0.00301132
D9	19	CBF7	0.693414	0.00310433
D9	20	CBF7	0.694551	0.00327601
D9	21	CBF7	0.694768	0.00252782
D9	22	CBF7	0.695936	0.00273091
D9	23	CBF7	0.697081	0.00291166
D9	24	CBF7	0.69867	0.00353544
D9	25	CBF7	0.697672	0.00157209
D9	26	CBF7	0.699754	0.00268987
D9	27	CBF7	0.698953	0.000923752
D9	28	CBF7	0.699439	0.000444494
D9	29	CBF7	0.700202	0.000242576
D9	30	CBF7	0.701088	0.00016392
D9	31	CBF7	0.701729	-0.000160009
D9	32	CBF7	0.702416	-0.000438161
D9	33	CBF7	0.702426	-0.00139336
D9	34	CBF7	0.703059	-0.00172498
D9	35	CBF7	0.703038	-0.00271112
D9	36	CBF7	0.704233	-0.00248102
D9	37	CBF7	0.704543	-0.00313534
D9	38	CBF7	0.705176	-0.00346767
D9	39	CBF7	0.705445	-0.00416359
D9	40	CBF7	0.705	-0.00557334
D10	1	CBF7	0.544343	-0.00735836
D10	2	CBF7	0.546665	-0.0057242
D10	3	CBF7	0.546956	-0.00612137
D10	4	CBF7	0.549887	-0.00387889
D10	5	CBF7	0.550267	-0.0041872
D10	6	CBF7	0.552539	-0.00260311
D10	7	CBF7	0.554422	-0.00140776
D10	8	CBF7	0.554914	-0.00160413
D10	9	CBF7	0.557117	-8.96601e-05
D10	10	CBF7	0.559114	0.00121977
D10	11	CBF7	0.559406	0.000823729
D10	12	CBF7	0.561425	0.0021545
D10	13	CBF7	0.561435	0.00147629
D10	14	CBF7	0.562626	0.00197903
D10	15	CBF7	0.56324	0.00190449
D10	16	CBF7	0.565016	0.00299297
D10	17	CBF7	0.565937	0.00322558
D10	18	CBF7	0.565267	0.00186716
D10	19	CBF7	0.566561	0.00247332
D10	20	CBF7	0.568009	0.00323331
D10	21	CBF7	0.566809	0.00134441
D10	22	CBF7	0.56848	0.00232744
D10	23	CBF7	0.56892	0.0020794
D10	24	CBF7	0.56906	0.00153107
D10	25	CBF7	0.57003	0.0018128
D10	26	CBF7	0.570393	0.00148835
D10	27	CBF7	0.57061	0.0010172
D10	28	CBF7	0.57115	0.000868286
D10	29	CBF7	0.57123	0.000260471
D10	30	CBF7	0.571446	-0.000212161
D10	31	CBF7	0.571266	-0.00108039
D10	32	CBF7	0.573129	9.51683e-05
D10	33	CBF7	0.57258	-0.00114207
D10	34	CBF7	0.572415	-0.00199581
D10	35	CBF7	0.573518	-0.00158075
D10	36	CBF7	0.573527	-0.00226009
D10	37	CBF7	0.57396	-0.00251499
D10	38	CBF7	0.574699	-0.00246382
D10	39	CBF7	0.574819	-0.00303253
D10	40	CBF7	0.574923	-0.00361674
D11	1	CBF7	0.518117	-0.0041348
D11	2	CBF7	0.518908	-0.00417654
D11	3	CBF7	0.519287	-0.00462973
D11	4	CBF7	0.52224	-0.00250907
D11	5	CBF7	0.522322	-0.00325998
D11	6	CBF7	0.525515	-0.000899831
D11	7	CBF7	0.525481	-0.0017662
D11	8	CBF7	0.527656	-0.000424334
D11	9	CBF7	0.529089	0.000175751
D11	10	CBF7	0.530832	0.00108685
D11	11	CBF7	0.532666	0.00208766
D11	12	CBF7	0.532017	0.000605635
D11	13	CBF7	0.534159	0.00191537
D11	14	CBF7	0.53541	0.00233313
D11	15	CBF7	0.535103	0.00119383
D11	16	CBF7	0.53627	0.00152826
D11	17	CBF7	0.538079	0.00250439
D11	18	CBF7	0.538179	0.00177195
D11	19	CBF7	0.539816	0.00257612
D11	20	CBF7	0.539368	0.00129562
D11	21	CBF7	0.540566	0.00166039
D11	22	CBF7	0.540282	0.000543679
D11	23	CBF7	0.542257	0.00168593
D11	24	CBF7	0.542809	0.00140559
D11	25	CBF7	0.542789	0.000552754
D11	26	CBF7	0.543103	3.38813e-05
D11	27	CBF7	0.544056	0.000154983
D11	28	CBF7	0.544115	-0.00061864
D11	29	CBF7	0.543847	-0.00171937
D11	30	CBF7	0.545126	-0.00127355
D11	31	CBF7	0.54526	-0.00197171
D11	32	CBF7	0.546653	-0.00141138
D11	33	CBF7	0.547192	-0.0017059
D11	34	CBF7	0.548261	-0.00146946
D11	35	CBF7	0.54911	-0.00145261
D11	36	CBF7	0.552066	0.000670611
D11	37	CBF7	0.556214	0.00398563
D11	38	CBF7	0.562383	0.00932208
D11	39	CBF7	0.575959	0.0220652
D11	40	CBF7	0.603253	0.0485266
D12	1	CBF7	0.6734	-0.0107016
D12	2	CBF7	0.674831	-0.00980783
D12	3	CBF7	0.677511	-0.00766448
D12	4	CBF7	0.679854	-0.00585843
D12	5	CBF7	0.68206	-0.00418887
D12	6	CBF7	0.684039	-0.00274659
D12	7	CBF7	0.686328	-0.000994012
D12	8	CBF7	0.688803	0.000944238
D12	9	CBF7	0.688066	-0.000329784
D12	10	CBF7	0.689634	0.000701939
D12	11	CBF7	0.690901	0.00143135
D12	12	CBF7	0.691712	0.00170627
D12	13	CBF7	0.693652	0.00310915
D12	14	CBF7	0.693306	0.00222638
D12	15	CBF7	0.694538	0.00292217
D12	16	CBF7	0.695289	0.00313582
D12	17	CBF7	0.694176	0.00148646
D12	18	CBF7	0.69628	0.00305421
D12	19	CBF7	0.694878	0.00111542
D12	20	CBF7	0.699239	0.00493968
D12	21	CBF7	0.696569	0.00173262
D12	22	CBF7	0.697454	0.00208068
D12	23	CBF7	0.69788	0.00197002
D12	24	CBF7	0.69786	0.00141369
D12	25	CBF7	0.696836	-0.000147205
D12	26	CBF7	0.698558	0.0010377
D12	27	CBF7	0.699478	0.00142176
D12	28	CBF7	0.69988	0.00128708
D12	29	CBF7	0.699083	-4.73202e-05
D12	30	CBF7	0.70015	0.000483545
D12	31	CBF7	0.700726	0.000522673
D12	32	CBF7	0.70136	0.000620332
D12	33	CBF7	0.70051	-0.000766641
D12	34	CBF7	0.699063	-0.00275061
D12	35	CBF7	0.69835	-0.0040005
D12	36	CBF7	0.701036	-0.00185071
D12	37	CBF7	0.701917	-0.00150623
D12	38	CBF7	0.700741	-0.00321894
D12	39	CBF7	0.701224	-0.00327286
D12	40	CBF7	0.701845	-0.00318873
E1	1	CBF6	0.694017	-0.00179344
E1	2	CBF6	0.693684	-0.003071
E1	3	CBF6	0.694307	-0.00339209
E1	4	CBF6	0.69586	-0.00278329
E1	5	CBF6	0.698881	-0.00070648
E1	6	CBF6	0.699775	-0.000756128
E1	7	CBF6	0.702033	0.00055762
E1	8	CBF6	0.705183	0.00276395
E1	9	CBF6	0.704725	0.00136145
E1	10	CBF6	0.705548	0.0012398
E1	11	CBF6	0.707946	0.00269428
E1	12	CBF6	0.707397	0.00120118
E1	13	CBF6	0.710298	0.00315795
E1	14	CBF6	0.709085	0.00100044
E1	15	CBF6	0.709696	0.000667548
E1	16	CBF6	0.709819	-0.000153265
E1	17	CBF6	0.710689	-0.000227471
E1	18	CBF6	0.711279	-0.00058158
E1	19	CBF6	0.711924	-0.000881031
E1	20	CBF6	0.711106	-0.00264276
E1	21	CBF6	0.711771	-0.00292177
E1	22	CBF6	0.71418	-0.00145687
E1	23	CBF6	0.715058	-0.0015232
E1	24	CBF6	0.717656	0.000129934
E1	25	CBF6	0.721722	0.00325179
E1	26	CBF6	0.730811	0.0113969
E1	27	CBF6	0.749331	0.0289728
E1	28	CBF6	0.786029	0.0647268
E1	29	CBF6	0.850403	0.128157
E1	30	CBF6	0.963767	0.240576
E1	31	CBF6	1.149	0.424862
E1	32	CBF6	1.41177	0.686689
E1	33	CBF6	1.71588	0.989854
E1	34	CBF6	2.00731	1.28035
E1	35	CBF6	2.23032	1.50241
E1	36	CBF6	2.41047	1.68161
E1	37	CBF6	2.55054	1.82074
E1	38	CBF6	2.67348	1.94274
E1	39	CBF6	2.76517	2.03348
E1	40	CBF6	2.84529	2.11265
E2	1	CBF6	0.763414	-0.00346958
E2	2	CBF6	0.764403	-0.00362639
E2	3	CBF6	0.765718	-0.0034561
E2	4	CBF6	0.767873	-0.00244598
E2	5	CBF6	0.76994	-0.00152455
E2	6	CBF6	0.771972	-0.000637573
E2	7	CBF6	0.774177	0.000422377
E2	8	CBF6	0.775402	0.000501534
E2	9	CBF6	0.778007	0.00196191
E2	10	CBF6	0.778112	0.000921212
E2	11	CBF6	0.780038	0.00170251
E2	12	CBF6	0.780663	0.00118175
E2	13	CBF6	0.784269	0.00364282
E2	14	CBF6	0.784561	0.00279018
E2	15	CBF6	0.783406	0.000489681
E2	16	CBF6	0.78647	0.00240812
E2	17	CBF6	0.786342	0.00113568
E2	18	CBF6	0.785261	-0.00109103
E2	19	CBF6	0.785651	-0.00184616
E2	20	CBF6	0.787748	-0.000894571
E2	21	CBF6	0.787762	-0.00202581
E2	22	CBF6	0.78869	-0.00224271
E2	23	CBF6	0.790498	-0.0015802
E2	24	CBF6	0.79381	0.000586908
E2	25	CBF6	0.798057	0.00368832
E2	26	CBF6	0.809127	0.0136134
E2	27	CBF6	0.829416	0.0327576
E2	28	CBF6	0.865338	0.0675344
E2	29	CBF6	0.931719	0.13277
E2	30	CBF6	1.04944	0.249346
E2	31	CBF6	1.23466	0.433417
E2	32	CBF6	1.48971	0.687326
E2	33	CBF6	1.77853	0.975004
[truncated: 1,847 more rows]

## Sheet: BioGroup Analysis Result
Block Type	96alum
Chemistry	SYBR_GREEN
Experiment File Name	D:\HAIFENG\Untitled.eds
Experiment Run End Time	2021-08-29 11:47:26 AM CST
Instrument Type	sds7500
Passive Reference	ROX
Biogroup Name	Target Name	Task	RQ	RQ Min	RQ Max	Cт Mean	ΔCт Mean	ΔCт SE	ΔΔCт
Analysis Type	Singleplex
Endogenous Control	CBF6
RQ Min/Max Confidence Level	95.0
Reference Biogroup Name

## Sheet: Technical Analysis Result
Block Type	96alum
Chemistry	SYBR_GREEN
Experiment File Name	D:\HAIFENG\Untitled.eds
Experiment Run End Time	2021-08-29 11:47:26 AM CST
Instrument Type	sds7500
Passive Reference	ROX
Sample Name	Target Name	Task	RQ	RQ Min	RQ Max	Cт Mean	ΔCт Mean	ΔCт SE	ΔΔCт
3-1	CBF7	UNKNOWN	1	0.452288	2.21098	30.9316	1.97009	0.412285	0
9-3	CBF7	UNKNOWN	0.663169			32.2597	2.56264		0.592551
3-2	CBF7	UNKNOWN	0.579705	0.14282	2.35303	30.9484	2.7567	0.727955	0.786608
12-1	CBF7	UNKNOWN
3-3	CBF7	UNKNOWN	1.93952	1.32181	2.84591	29.9977	1.01439	0.199243	-0.955701
12-2	CBF7	UNKNOWN	14.3766			32.7667	-1.87556		-3.84565
6-1	CBF7	UNKNOWN	1.09063	0.549335	2.16531	32.7347	1.84492	0.310896	-0.125168
12-3	CBF7	UNKNOWN	0.0364584			38.4693	6.7477		4.77761
6-2	CBF7	UNKNOWN	0.552253			31.575	2.82669		0.856599
24-1	CBF7	UNKNOWN
6-3	CBF7	UNKNOWN	1.01181	0.661296	1.54812	31.0161	1.95315	0.192799	-0.0169411
24-2	CBF7	UNKNOWN
9-1	CBF7	UNKNOWN
24-3	CBF7	UNKNOWN	0.0277752	0.0125932	0.0612602	37.4543	7.14015	0.358578	5.17006
9-2	CBF7	UNKNOWN	20.0464			32.687	-2.35518		-4.32527
Analysis Type	Singleplex
Endogenous Control	CBF6
RQ Min/Max Confidence Level	95.0
Reference Sample	3-1
