# Supplementary material for: Genome-wide identification of CBF genes and their responses to cold acclimation in Taraxacum kok-saghyz
Source: PeerJ journal article supplement (doi:10.7717/peerj.13429), 2022-05-12
Supplement: Raw_data.zip [file CBF7-CBF8.xls]

## Sheet: Results
Block Type	96alum
Chemistry	SYBR_GREEN
Experiment File Name	D:\HAIFENG\CBF78Untitled.eds
Experiment Run End Time	2013-01-10 10:21:38 AM CST
Instrument Type	sds7500
Passive Reference	ROX
Well	Sample Name	Target Name	Task	Reporter	Quencher	RQ	RQ Min	RQ Max	Cт	Cт Mean	Cт SD	ΔCт	ΔCт Mean	ΔCт SE	HK Control ΔCт Mean	HK Control ΔCт SE	ΔΔCт	Automatic Ct Threshold	Ct Threshold	Automatic Baseline	Baseline Start	Baseline End	Efficiency	Tm1	Tm2	Tm3	Comments	HIGHSD	NOAMP	EXPFAIL	MTP
A2	3-1	CBF7	UNKNOWN	SYBR	None				29.5643	29.5554	0.20782							TRUE	0.0815244	TRUE	3	39	1	64.6866				N	Y	Y	N
A3	3-1	CBF7	UNKNOWN	SYBR	None				29.3476	29.5554	0.20782							TRUE	0.0815244	TRUE	3	39	1	67.3658				N	Y	Y	N
A4	3-1	CBF7	UNKNOWN	SYBR	None				29.7542	29.5554	0.20782							TRUE	0.0815244	TRUE	3	39	1	64.8652				N	Y	Y	N
A5	12-3	CBF7	UNKNOWN	SYBR	None				33.1854	33.1967	0.0331848							TRUE	0.0815244	TRUE	3	39	1	65.7583				N	Y	Y	N
A6	12-3	CBF7	UNKNOWN	SYBR	None				33.1636	33.1967	0.0331848							TRUE	0.0815244	TRUE	3	39	1	63.7936				N	Y	Y	N
A7	12-3	CBF7	UNKNOWN	SYBR	None				33.2413	33.1967	0.0331848							TRUE	0.0815244	TRUE	3	39	1	64.1508				N	Y	Y	N
A8	6-2	CBF8	UNKNOWN	SYBR	None				26.935	26.935	0.0177334							TRUE	0.376034	TRUE	3	21	1	83.6193				N	N	N	N
A9	6-2	CBF8	UNKNOWN	SYBR	None				26.942	26.935	0.0177334							TRUE	0.376034	TRUE	3	21	1	83.4406				N	N	N	N
A10	6-2	CBF8	UNKNOWN	SYBR	None				26.9173	26.935	0.0177334							TRUE	0.376034	TRUE	3	21	1	83.4406				N	N	N	N
B2	3-2	CBF7	UNKNOWN	SYBR	None				29.2637	29.2333	0.0381956							TRUE	0.0815244	TRUE	3	29	1	84.8695				Y	N	N	N
B3	3-2	CBF7	UNKNOWN	SYBR	None				29.1951	29.2333	0.0381956							TRUE	0.0815244	TRUE	3	30	1	84.8695				Y	N	N	N
B4	3-2	CBF7	UNKNOWN	SYBR	None				29.241	29.2333	0.0381956							TRUE	0.0815244	TRUE	3	29	1	84.8695				Y	N	N	N
B5	24-1	CBF7	UNKNOWN	SYBR	None				36.6565	36.6533	0.307289							TRUE	0.0815244	TRUE	3	31	1	84.8695				N	N	N	N
B6	24-1	CBF7	UNKNOWN	SYBR	None				36.9573	36.6533	0.307289							TRUE	0.0815244	TRUE	3	39	1	64.3294				N	Y	Y	N
B7	24-1	CBF7	UNKNOWN	SYBR	None				36.346	36.6533	0.307289							TRUE	0.0815244	TRUE	3	39	1	66.1155				N	Y	Y	N
B8	6-3	CBF8	UNKNOWN	SYBR	None				27.7011	27.6984	0.015723							TRUE	0.376034	TRUE	3	20	1	83.7979				N	N	N	N
B9	6-3	CBF8	UNKNOWN	SYBR	None				27.6827	27.6984	0.015723							TRUE	0.376034	TRUE	3	20	1	83.6193				N	N	N	N
B10	6-3	CBF8	UNKNOWN	SYBR	None				27.7115	27.6984	0.015723							TRUE	0.376034	TRUE	3	20	1	83.6193				N	N	N	N
C2	3-3	CBF7	UNKNOWN	SYBR	None				29.5173	29.4841	0.0499614							TRUE	0.0815244	TRUE	3	29	1	84.8695				Y	N	N	N
C3	3-3	CBF7	UNKNOWN	SYBR	None				29.4342	29.4841	0.0499614							TRUE	0.0815244	TRUE	3	28	1	85.0481				Y	N	N	Y
C4	3-3	CBF7	UNKNOWN	SYBR	None				29.5009	29.4841	0.0499614							TRUE	0.0815244	TRUE	3	28	1	85.0481				Y	N	N	N
C5	24-2	CBF7	UNKNOWN	SYBR	None				36.5478	36.546	0.00358496							TRUE	0.0815244	TRUE	3	39	1	65.2225				N	Y	Y	N
C6	24-2	CBF7	UNKNOWN	SYBR	None				36.5478	36.546	0.00358496							TRUE	0.0815244	TRUE	3	31	1	85.0481				N	N	N	N
C7	24-2	CBF7	UNKNOWN	SYBR	None				36.5424	36.546	0.00358496							TRUE	0.0815244	TRUE	3	39	1	63.7936				N	Y	Y	N
C8	12-1	CBF8	UNKNOWN	SYBR	None				30.0078	29.6966	0.273239							TRUE	0.376034	TRUE	3	24	1	83.9765				N	N	N	N
C9	12-1	CBF8	UNKNOWN	SYBR	None				29.5862	29.6966	0.273239							TRUE	0.376034	TRUE	3	23	1	83.9765				N	N	N	N
C10	12-1	CBF8	UNKNOWN	SYBR	None				29.4959	29.6966	0.273239							TRUE	0.376034	TRUE	3	23	1	83.7979				N	N	N	N
D2	6-1	CBF7	UNKNOWN	SYBR	None				28.8531	28.5782	0.284706							TRUE	0.0815244	TRUE	3	25	1	85.0481				N	N	N	N
D3	6-1	CBF7	UNKNOWN	SYBR	None				28.2846	28.5782	0.284706							TRUE	0.0815244	TRUE	3	24	1	85.2267				N	N	N	N
D4	6-1	CBF7	UNKNOWN	SYBR	None				28.597	28.5782	0.284706							TRUE	0.0815244	TRUE	3	25	1	85.2267				N	N	N	N
D5	24-3	CBF7	UNKNOWN	SYBR	None				35.7899	35.7375	0.0882901							TRUE	0.0815244	TRUE	3	39	1	65.9369				N	Y	Y	N
D6	24-3	CBF7	UNKNOWN	SYBR	None				35.6492	35.7375	0.0882901							TRUE	0.0815244	TRUE	3	39	1	66.8299				N	Y	Y	N
D7	24-3	CBF7	UNKNOWN	SYBR	None				35.7734	35.7375	0.0882901							TRUE	0.0815244	TRUE	3	39	1	65.7583				N	Y	Y	N
D8	12-2	CBF8	UNKNOWN	SYBR	None				32.6199	32.6802	0.452255							TRUE	0.376034	TRUE	3	26	1	83.7979				N	N	N	N
D9	12-2	CBF8	UNKNOWN	SYBR	None				32.2612	32.6802	0.452255							TRUE	0.376034	TRUE	3	26	1	83.9765				N	N	N	N
D10	12-2	CBF8	UNKNOWN	SYBR	None				33.1597	32.6802	0.452255							TRUE	0.376034	TRUE	3	27	1	83.6193				N	N	N	N
E2	6-2	CBF7	UNKNOWN	SYBR	None				27.6592	27.6477	0.0835486							TRUE	0.0815244	TRUE	3	27	1	85.0481				N	N	N	N
E3	6-2	CBF7	UNKNOWN	SYBR	None				27.5591	27.6477	0.0835486							TRUE	0.0815244	TRUE	3	27	1	85.0481				N	N	N	N
E4	6-2	CBF7	UNKNOWN	SYBR	None				27.725	27.6477	0.0835486							TRUE	0.0815244	TRUE	3	27	1	85.0481				N	N	N	N
E5	3-1	CBF8	UNKNOWN	SYBR	None				29.4341	29.5242	0.0901057							TRUE	0.376034	TRUE	3	39	1	63.9722				N	Y	Y	N
E6	3-1	CBF8	UNKNOWN	SYBR	None				29.5635	29.5242	0.0901057							TRUE	0.376034	TRUE	3	39	1	63.4364				N	Y	Y	N
E7	3-1	CBF8	UNKNOWN	SYBR	None				29.5749	29.5242	0.0901057							TRUE	0.376034	TRUE	3	39	1	63.4364				N	Y	Y	N
E8	12-3	CBF8	UNKNOWN	SYBR	None				32.1622	32.2749	0.546501							TRUE	0.376034	TRUE	3	30	1	84.3337				Y	N	N	N
E9	12-3	CBF8	UNKNOWN	SYBR	None				32.2929	32.2749	0.546501							TRUE	0.376034	TRUE	3	29	1	83.9765				Y	N	N	N
E10	12-3	CBF8	UNKNOWN	SYBR	None				32.3695	32.2749	0.546501							TRUE	0.376034	TRUE	3	39	1	63.9722				N	Y	Y	N
F2	6-3	CBF7	UNKNOWN	SYBR	None				29.4534	29.3462	0.141082							TRUE	0.0815244	TRUE	3	26	1	85.0481				N	N	N	N
F3	6-3	CBF7	UNKNOWN	SYBR	None				29.1863	29.3462	0.141082							TRUE	0.0815244	TRUE	3	25	1	85.0481				N	N	N	N
F4	6-3	CBF7	UNKNOWN	SYBR	None				29.3987	29.3462	0.141082							TRUE	0.0815244	TRUE	3	26	1	85.0481				N	N	N	N
F5	3-2	CBF8	UNKNOWN	SYBR	None				29.0645	29.0279	0.0835449							TRUE	0.376034	TRUE	3	39	1	64.3294				N	Y	Y	N
F6	3-2	CBF8	UNKNOWN	SYBR	None				29.0749	29.0279	0.0835449							TRUE	0.376034	TRUE	3	39	1	68.4374				N	Y	Y	N
F7	3-2	CBF8	UNKNOWN	SYBR	None				28.9444	29.0279	0.0835449							TRUE	0.376034	TRUE	3	39	1	66.8299				N	Y	Y	N
F8	24-1	CBF8	UNKNOWN	SYBR	None				34.7278	34.3462	0.403936							TRUE	0.376034	TRUE	3	28	1	83.7979				N	N	N	N
F9	24-1	CBF8	UNKNOWN	SYBR	None				33.9231	34.3462	0.403936							TRUE	0.376034	TRUE	3	27	1	83.6193				N	N	N	N
F10	24-1	CBF8	UNKNOWN	SYBR	None				34.3876	34.3462	0.403936							TRUE	0.376034	TRUE	3	27	1	83.6193				N	N	N	N
G2	12-1	CBF7	UNKNOWN	SYBR	None				30.0441	30.045	1.61383							TRUE	0.0815244	TRUE	3	30	1	84.6909				Y	N	N	N
G3	12-1	CBF7	UNKNOWN	SYBR	None				30.0426	30.045	1.61383							TRUE	0.0815244	TRUE	3	33	1	84.6909				Y	N	N	N
G4	12-1	CBF7	UNKNOWN	SYBR	None				30.0483	30.045	1.61383							TRUE	0.0815244	TRUE	3	31	1	84.8695				Y	N	N	N
G5	3-3	CBF8	UNKNOWN	SYBR	None				29.0397	29.0316	0.00979197							TRUE	0.376034	TRUE	3	39	1	63.615				N	Y	Y	N
G6	3-3	CBF8	UNKNOWN	SYBR	None				29.0218	29.0316	0.00979197							TRUE	0.376034	TRUE	3	39	1	64.6866				N	Y	Y	N
G7	3-3	CBF8	UNKNOWN	SYBR	None				29.0333	29.0316	0.00979197							TRUE	0.376034	TRUE	3	39	1	67.9016				N	Y	Y	N
G8	24-2	CBF8	UNKNOWN	SYBR	None				33.5322	33.7251	0.279449							TRUE	0.376034	TRUE	3	23	1	83.6193				N	N	N	N
G9	24-2	CBF8	UNKNOWN	SYBR	None				33.6874	33.7251	0.279449							TRUE	0.376034	TRUE	3	23	1	83.6193				N	N	N	N
G10	24-2	CBF8	UNKNOWN	SYBR	None				33.9559	33.7251	0.279449							TRUE	0.376034	TRUE	3	23	1	83.4406				N	N	N	N
H2	12-2	CBF7	UNKNOWN	SYBR	None				33.1659	33.1925	0.0775523							TRUE	0.0815244	TRUE	3	39	1	67.0086				N	N	Y	N
H3	12-2	CBF7	UNKNOWN	SYBR	None				33.115	33.1925	0.0775523							TRUE	0.0815244	TRUE	3	39	1	63.9722				N	Y	Y	N
H4	12-2	CBF7	UNKNOWN	SYBR	None				33.2967	33.1925	0.0775523							TRUE	0.0815244	TRUE	3	39	1	63.7936				N	Y	Y	N
H5	6-1	CBF8	UNKNOWN	SYBR	None				27.4369	27.5691	0.132173							TRUE	0.376034	TRUE	3	20	1	83.6193				N	N	N	N
H6	6-1	CBF8	UNKNOWN	SYBR	None				27.7088	27.5691	0.132173							TRUE	0.376034	TRUE	3	20	1	83.6193				N	N	N	N
H7	6-1	CBF8	UNKNOWN	SYBR	None				27.5616	27.5691	0.132173							TRUE	0.376034	TRUE	3	20	1	83.6193				N	N	N	N
H8	24-3	CBF8	UNKNOWN	SYBR	None				33.6811	33.5916	0.14916							TRUE	0.376034	TRUE	3	28	1	83.4406				Y	N	N	N
H9	24-3	CBF8	UNKNOWN	SYBR	None				33.6512	33.5916	0.14916							TRUE	0.376034	TRUE	3	30	1	83.4406				Y	N	N	N
H10	24-3	CBF8	UNKNOWN	SYBR	None				33.4424	33.5916	0.14916							TRUE	0.376034	TRUE	3	29	1	83.6193				Y	N	N	N
Analysis Type	Singleplex
Endogenous Control	CBF7
RQ Min/Max Confidence Level	95.0
Reference Sample	3-1

## Sheet: Raw Data
Block Type	96alum
Chemistry	SYBR_GREEN
Experiment File Name	D:\HAIFENG\CBF78Untitled.eds
Experiment Run End Time	2013-01-10 10:21:38 AM CST
Instrument Type	sds7500
Passive Reference	ROX
Well	Cycle	1	2	3	4	5
A1	1	40101.4	5184.8	2911.47	3648.09	1266.18
A2	1	335453	78112.3	65676.8	541924	3184.1
A3	1	196706	47985.7	47070.2	393277	1710.62
A4	1	223661	51401.6	53751.1	416901	1608.49
A5	1	226910	51500.6	51601.9	372765	1662.27
A6	1	188940	42559.6	44379.4	321439	1483.45
A7	1	228569	51962.3	53710	382353	2028.59
A8	1	240858	55722.7	54790.6	394543	2399.37
A9	1	239351	56835.8	54654.2	407647	2460.97
A10	1	216686	57288	48215.9	370106	1837.76
A11	1	0	0	0	0	0
A12	1	0	75.7221	154.724	296.329	397.973
B1	1	0	0	0	0	0
B2	1	348969	87577.1	64885.5	477866	3646.72
B3	1	186027	43612.2	44005.5	333531	1341.72
B4	1	194772	44005.8	45224.5	324733	8250.24
B5	1	238035	52619.5	56490.5	382395	2494.15
B6	1	192706	43986.9	49330.4	331614	2429.49
B7	1	227783	50950.4	56255.4	377389	2112.65
B8	1	233691	53585.9	53953.1	360661	2171.78
B9	1	235674	56747.4	55289.5	385729	1811.93
B10	1	194521	50612.8	46236.8	334706	1431.32
B11	1	0	0	108.35	173.671	9.23724
B12	1	0	0	0	0	0
C1	1	1569.07	425.15	598.053	674.308	275.354
C2	1	347996	78765.7	71258.4	516098	3259.1
C3	1	196471	45655.6	49643.3	355505	1812.03
C4	1	187838	42050.8	46938.8	320966	2088.3
C5	1	257476	56935.3	63241.4	407344	2399.67
C6	1	194678	44045.5	54366.6	353711	2039.5
C7	1	242923	54582.9	62868.9	400090	2465.07
C8	1	229040	54922.6	56739.5	364887	2045.35
C9	1	241741	60597.9	58753.4	388700	1804.33
C10	1	202043	52775.8	49081.9	341720	1597.91
C11	1	725.754	486.794	261.708	576.664	544.321
C12	1	0	0	0	456.699	275.696
D1	1	29860	6402.97	5205.81	7104.55	4224.74
D2	1	372326	84486.6	74812.2	515469	3244.7
D3	1	219077	53224.7	55493.3	375905	1919.8
D4	1	218676	51014.1	54081.7	346071	2322.37
D5	1	310186	67881	83154	511832	3264.77
D6	1	210547	47569.7	64114.6	396458	2562.07
D7	1	268393	57904.8	74187.6	443321	2919.66
D8	1	240972	58783	63657	390330	1986.12
D9	1	250589	63567.4	65124.3	411123	2269.81
D10	1	233890	62050.7	59568	398963	1545.9
D11	1	15260.3	4749.06	4547.08	6753.08	3063.42
D12	1	7867.01	1221.98	732.753	1091.98	103.788
E1	1	3971.52	681.943	458.857	790.323	79.2761
E2	1	419750	101900	85723.9	575441	3940.8
E3	1	238838	59028.2	63177.1	415898	2084
E4	1	260435	60920.6	65359	397737	2722.04
E5	1	335875	80887	82242.2	485877	3069.58
E6	1	258210	62618.4	69926.8	412685	2615.61
E7	1	304688	74414	79985.7	464556	2370.5
E8	1	303169	76151.7	80616	481326	2884.19
E9	1	291693	74617.8	76081.5	473269	2443.02
E10	1	236936	63858.6	60316.6	397792	1932.21
E11	1	17641.4	2691.42	1902.96	2549.05	1213.83
E12	1	5388.82	1263.56	1063.98	2244.44	2556.09
F1	1	44631.5	7953.24	5839.65	6991.66	3815.81
F2	1	426835	97757.4	91020.5	619550	3782.44
F3	1	247682	60650.5	66374.5	430996	2272.63
F4	1	264852	59776.7	67360.3	416017	2864.57
F5	1	378835	83122.8	108568	670220	3813.43
F6	1	246335	55235.4	80129.3	492018	2531.63
F7	1	291266	63981.1	84415.6	501776	2870.82
F8	1	309178	77922.2	81690.3	489259	3999.54
F9	1	327700	84324	85221.7	535247	2661.71
F10	1	267507	72820.5	67245.4	451558	1613.73
F11	1	16913	2698.53	1513.84	2214.33	251.294
F12	1	0	0	0	0	271.594
G1	1	16547.3	4477.62	4939.33	10478.7	13413.3
G2	1	491253	118339	98256.6	672361	4376.32
G3	1	316044	75733.1	78724.7	533624	2063.3
G4	1	329059	76720.7	78059	493320	3096.6
G5	1	392192	89281.3	103108	642759	3460.78
G6	1	274509	62828.5	82054.9	511614	3107.21
G7	1	298856	65706.3	79566.5	486420	4937.56
G8	1	302193	73181.6	80060.5	496986	2977.38
G9	1	344337	88189.8	86223.5	548619	3115.5
G10	1	256231	68645.8	63892.7	443080	1106.48
G11	1	10479.8	2659.71	2462.49	4074.06	2857.51
G12	1	79453.4	15934.9	12799.1	17669.7	10316.2
H1	1	27262.6	5235.65	3757.48	5865.3	6238.4
H2	1	472416	117039	91099.4	654347	3699.99
H3	1	311022	79080.8	73637.3	518498	2502.24
H4	1	288330	69722.4	66225.7	439489	2548.15
H5	1	464584	110108	99780.5	616658	4438.1
H6	1	301688	74044.6	74944.3	481879	2695.64
H7	1	362779	89459.8	86322.4	547548	2982.53
H8	1	316909	80595.1	75832.8	493104	2955.54
H9	1	337212	85970.6	81506.7	551342	3623.08
H10	1	287019	78845.6	65981.8	469021	2322.73
H11	1	10355.6	1442.85	440.926	1443.83	1190.57
H12	1	18747.7	3261.11	1834.96	3673.65	3528.67
A1	2	40941.5	4792.54	2878.55	3808.62	1471.62
A2	2	336457	77995.3	65576.2	540620	2963.26
A3	2	197444	47986.8	47094.6	392434	1713.57
A4	2	223499	51621	53443.4	415240	2000.42
A5	2	226761	51689.6	51654.2	371555	1926.36
A6	2	189458	43101.9	44354.7	319639	1256.28
A7	2	228789	52569.1	53682.6	382176	2189.46
A8	2	239150	55647.7	54185.1	391335	2328.8
A9	2	238074	56511.1	53989.2	403648	2254.68
A10	2	215314	57245.5	48155.1	368167	1931.36
A11	2	0	0	0	0	0
A12	2	0	0	93.6863	915.797	292.952
B1	2	0	0	0	301.862	337.034
B2	2	350128	87909	65222.6	479193	3244.49
B3	2	186304	43816.9	44191.6	333852	1665.38
B4	2	195550	44385.5	45336.7	324932	8826.3
B5	2	239470	53098.3	56770	383077	2636.55
B6	2	193875	44401.7	49267.2	330854	2247.07
B7	2	229067	51436	56194.8	377201	2244.93
B8	2	234020	54038.1	53902.1	359661	2344.41
B9	2	235264	56629.4	55149.7	384564	1596.73
B10	2	193879	50442.4	45817	331194	1715.96
B11	2	0	0	14.3104	433.67	0
B12	2	0	0	0	0	0
C1	2	1680.66	637.725	456.761	804.699	346.651
C2	2	350238	79507.8	71514.6	518065	3529.48
C3	2	197670	46240.1	49802.8	355744	1877.58
C4	2	188473	42181.9	46971.8	320233	2142.02
C5	2	259573	57306.3	63307.6	407722	2693.26
C6	2	196257	44748.9	54438.9	353106	1982.49
C7	2	245329	55257.5	63143.4	400983	2420.76
C8	2	230097	55338.6	56939.2	365961	2042.05
C9	2	243036	60791.6	58834.9	389376	1789.45
C10	2	202729	53096.1	49093.9	341482	1565.75
C11	2	927.238	274.01	214.399	680.038	380.923
C12	2	0	0	0	552.441	0
D1	2	30122.4	6205.53	5097.18	6814.92	4483.54
D2	2	374399	84829.4	74695.4	516664	3675.45
D3	2	219400	53468.9	55498.3	375794	2060.19
D4	2	219772	51379.4	54148.5	345666	2329.28
D5	2	312396	68556.1	83411.4	512712	3253.67
D6	2	212163	48285	63975.7	394712	1871.18
D7	2	270644	58758.4	74291.6	442927	3201.61
D8	2	242466	59415.6	63777.9	391842	1892.46
D9	2	252117	63911.1	65252.5	413080	2518.54
D10	2	235098	62521.1	59612.3	399984	1590.85
D11	2	15138.2	4831.51	4567.37	7003.45	3174.17
D12	2	8546.63	952.461	649.647	746.417	170.015
E1	2	3483.57	985.333	514.718	424.61	205.025
E2	2	423674	102568	86096.6	578069	4069.46
E3	2	240109	59257.1	63549.5	417119	2211.39
E4	2	262817	61468.6	65407.6	397965	2894.84
E5	2	337528	81725.1	82386.4	486905	3074.66
E6	2	259193	63172.1	69912.1	412066	2978.94
E7	2	307377	75460.7	80160.7	465279	3040.95
E8	2	305173	76792.2	81029.5	482248	3188.37
E9	2	292436	75080.1	76350.4	474188	2368.66
E10	2	237434	63948.8	60373.4	397883	1855.92
E11	2	17626.5	2514.75	1936.67	2503.91	1357.38
E12	2	4936.1	1384.53	937.195	2461.15	2751.02
F1	2	44637.8	8139.53	5807.9	6857.54	3927.04
F2	2	428402	97916.5	91556.9	622116	4326.64
F3	2	250240	61119	66686.3	432338	2238.21
F4	2	266898	60213.4	67628.9	416535	3182.28
F5	2	382102	83744	108770	671711	3736.26
F6	2	248755	56041.6	80187	493042	2640.66
F7	2	292892	64489.4	84726.1	502228	3036.26
F8	2	310633	78474.6	82041.3	490261	4239.39
F9	2	329112	85047.6	85635	536901	2664.95
F10	2	268864	73249.3	67527.2	452053	2126.41
F11	2	17125.7	2685.62	1710.08	2328.59	0
F12	2	0	0	0	0	543.188
G1	2	16151.4	4701.59	4878.9	10315.9	13639
G2	2	495718	119086	98440	674319	3891.7
G3	2	317854	76678.4	78617.6	535322	1637.76
G4	2	331596	77659.6	78640.2	494964	3047.24
G5	2	394438	89982.6	103137	644230	3797.55
G6	2	276519	63626.1	81923.4	512759	3044.25
G7	2	300681	66597	80027	487587	5297.18
G8	2	302209	72699.2	80340.4	498015	3069.69
G9	2	346046	88679.4	86103.3	548489	2831.44
G10	2	255812	68848.8	63709.2	441711	865.322
G11	2	10417.3	2856.07	2698.7	3743.96	2416.31
G12	2	79100.4	15763.2	12994.8	17479.9	9896.71
H1	2	26818.9	4914.98	3619.2	6255.63	6165.34
H2	2	473982	117032	91130.9	653348	3813.33
H3	2	311981	79964.4	73463	517532	2718.49
H4	2	288973	70537.5	66092.7	438227	3014.7
H5	2	464205	110269	99956.4	617888	4566.67
H6	2	301600	74504	74843.2	480722	2676.87
H7	2	362784	89683.4	86268.5	546477	2919.71
H8	2	317054	81134.1	75466.8	491422	2989.86
H9	2	337035	86093.4	81329.2	548626	3584.54
H10	2	286937	79063.7	65885	467860	2357.31
H11	2	10546.1	1479.99	398.039	1518.7	1153.36
H12	2	19802.4	3114.27	1799.64	4110.38	3581.81
A1	3	41611.3	5317.75	3046.12	3835.87	1435.19
A2	3	336350	77903.6	65573	538964	3333.8
A3	3	197470	48361	47152.4	391838	1569.38
A4	3	223556	51626.4	53243.5	413561	2150.43
A5	3	226149	51800.8	51400.3	369960	1837.25
A6	3	189529	43338	44300.5	318786	1434.49
A7	3	228461	52462.3	53620.7	380291	2025.37
A8	3	238989	55633.6	54053.4	389867	2373.64
A9	3	236842	56944.3	53976.8	401727	2224.8
A10	3	214430	57632.1	47945.8	367804	2032
A11	3	0	0	0	0	0
A12	3	0	213.258	146.207	927.086	440.81
B1	3	0	0	0	0	118.561
B2	3	351551	88596.2	65113.7	478767	3196.84
B3	3	187059	44077.2	43951.6	333839	1502.57
B4	3	196199	44754.2	45316.9	324708	8867.69
B5	3	240582	53449.1	56753.9	382709	2839.63
B6	3	194366	44888.4	49249.6	330115	2267.25
B7	3	230042	51827.1	56163.4	376522	2446.03
B8	3	233829	54167.8	53902.1	358679	2447.83
B9	3	234379	56968.9	55059.3	382781	1803.72
B10	3	193220	50791.3	45588.3	330001	1759.96
B11	3	0	3.12858	73.5962	173.671	0
B12	3	0	88.4977	0	0	0
C1	3	1878.31	469.221	722.292	656.923	491.704
C2	3	351832	80244.5	71893.5	519004	3458
C3	3	198279	46763.2	49994.2	356030	1989.95
C4	3	189605	42595.1	47007.8	320039	1994.53
C5	3	260733	57908.3	63587.4	407970	2738.01
C6	3	196632	45102.9	54446.1	352817	2114.17
C7	3	246740	55775.8	63029.6	401254	2724.38
C8	3	230435	55649.1	56999.5	366221	2413.19
C9	3	243083	60976.6	58904.1	389584	1635.72
C10	3	203016	53262.1	49193.7	341468	1637.91
C11	3	791.545	469.732	202.321	419.577	695.464
C12	3	0	0	0	366.46	87.8712
D1	3	30070.7	6448.62	5129.41	6848.05	4509.42
D2	3	374590	85111.4	74899.5	517070	3507.37
D3	3	220221	53740.7	55428.1	375864	2388.81
D4	3	220462	51752.8	54088.5	345537	2382.57
D5	3	314237	69404.2	83753.3	513302	3616.87
D6	3	212571	48483.3	63735.1	394012	2378.79
D7	3	271342	59045.4	74264.4	442982	3152.49
D8	3	243205	59691	63942.3	392185	2006.19
D9	3	252853	64453.3	65444.4	413417	2313.65
D10	3	235301	62848.5	59751.3	400404	1779.46
D11	3	15291.1	4726.48	4536.45	6885.91	3532.42
D12	3	8476.7	1048.03	608.094	1100.87	82.0422
E1	3	4025.27	967.567	473.487	678.006	92.9444
E2	3	425118	103213	86466.1	579886	3903.22
E3	3	240386	60094.6	63504.6	416814	1968.59
E4	3	264007	62045.1	65767.6	398346	2763.56
E5	3	338955	81992	82710.7	487800	3124.5
E6	3	259246	63526.9	69951.1	411682	2894.94
E7	3	308863	76230.7	80272.7	465933	2587.15
E8	3	305376	77348.4	81156.6	482513	2874.01
E9	3	292956	75147.4	76377.7	474884	2385.18
E10	3	238058	64236.4	60442.6	398305	1979.77
E11	3	17681.5	2681.09	1838.29	2570.29	1318.8
E12	3	5049.73	1128.46	1043.26	2562.65	2577.21
F1	3	45348.5	8067.88	5922.82	7136.09	3990.81
F2	3	429612	97445.2	91686.6	622837	3596.36
F3	3	251103	61765.3	66722.5	432631	2128.7
F4	3	267637	60898.5	67703.9	417111	3091.8
F5	3	383087	84222.3	108861	671871	3566.92
F6	3	249439	56595.3	80488.7	494218	2764.65
F7	3	294290	65041.6	84691.2	503476	3214.13
F8	3	311248	78969.3	82071.3	490653	4230.29
F9	3	330413	85666.1	85571.9	536688	2839.66
F10	3	270190	73990.8	67530.4	452437	2102.96
F11	3	16636.3	2675.94	1867.9	2332.63	51.076
F12	3	0	0	0	0	244.091
G1	3	16321.3	4652.18	4984.26	10488	13950.6
G2	3	498338	120371	98897.9	676004	4123.58
G3	3	319206	77963.8	78826.8	536572	2073.4
G4	3	333296	78410.9	78845.2	495582	2780.72
G5	3	395902	90388.7	103215	643475	3417.61
G6	3	277154	63950.7	82181.7	512572	3270.16
G7	3	301749	66905.7	79910.7	488565	5197.23
G8	3	301602	73083.2	79955.3	496668	2911.3
G9	3	346590	88654.1	86087.1	548210	3037.38
G10	3	255592	68579.3	63595.2	439831	1356.36
G11	3	10620.3	2872.64	2591	3713.62	2441.7
G12	3	78966.4	15645.9	12855.2	17511.1	10333.5
H1	3	27846.2	4863.44	3849.67	5801.4	6348.83
H2	3	473636	117691	90708.2	649894	3934.68
H3	3	311603	80071.9	73262.3	514635	2801.66
H4	3	289709	71027.2	65863.2	436941	3001.53
H5	3	462936	110378	99780.5	614811	4533.3
H6	3	300885	74734.6	74565.5	478259	2688.49
H7	3	362637	89989.8	86178.2	545127	2835.62
H8	3	316261	81070	75617.8	489462	3039.96
H9	3	336421	86716.9	80928.4	546022	3581.32
H10	3	286763	79213.4	65697.5	466084	2867.3
H11	3	10260.3	1577.13	360.514	1586.88	1178.61
H12	3	20200.2	2820.59	1797.78	3816.78	3904.21
A1	4	40566.4	4649.75	2909.97	3991.85	1248.69
A2	4	337222	78111.1	65383.8	539112	2859.21
A3	4	198638	48803.6	46928.1	391463	1328.09
A4	4	223483	51958.6	53269.1	413863	1923.25
A5	4	226945	52063.6	51381.5	370115	1808.09
A6	4	190388	43799.5	44492.5	318253	1650.42
A7	4	229250	52773.2	53533.1	380149	2076.85
A8	4	239201	56101.8	54130.5	389757	2601.12
A9	4	237281	56692	53778.8	400975	2224.8
A10	4	214933	58022.7	47993.6	367053	1976.65
A11	4	0	0	0	0	0
A12	4	0	143.718	0	547.503	497.466
B1	4	0	0	0	42.3426	274.423
B2	4	351564	88942.1	65229.5	479642	3110.41
B3	4	187897	44825.7	44063.5	333888	1182.83
B4	4	196917	45369.2	45290.1	325055	9102.25
B5	4	241452	53450.7	56950.7	383113	2634.87
B6	4	195046	45294.7	49273.6	330331	2167.97
B7	4	231165	52232.1	56239.7	376230	2355.8
B8	4	234764	54518.3	53888	358510	2333.27
B9	4	235437	57113.8	55153	383137	1685.44
B10	4	193555	51649.8	45810.7	329519	1829.1
B11	4	0	0	68.4854	465.154	0
B12	4	0	51.9187	0	0	213.836
C1	4	1390.24	559.954	479.904	471.892	427.782
C2	4	353725	80513.7	71830.6	519555	3596.82
C3	4	199374	47250.9	50083.4	356355	1884.13
C4	4	190144	42881.9	47023.3	320272	2119.55
C5	4	262160	58615	63469.4	408876	2534.83
C6	4	197731	45789.9	54353	352975	2255.49
C7	4	247008	56260.8	63205.5	401644	2678.43
C8	4	231154	55900.5	57114.5	366780	2230.92
C9	4	243804	61810	58926	390063	1778.71
C10	4	203529	53934	49113.7	341099	1590.09
C11	4	684.635	276.018	140.92	588.826	652.572
C12	4	0	40.5153	0	420.383	0
D1	4	30253	6438.75	5291.76	6945.01	4270.33
D2	4	376326	85363.6	74891.4	517857	3657.33
D3	4	221147	54186.6	55370.9	375891	2041.88
D4	4	221526	52123.4	54295.6	346208	2231.57
D5	4	315773	69582.7	83739.5	513999	3600.73
D6	4	213564	49027.2	63963.4	393776	2370.16
D7	4	272092	59736.9	74553.9	443570	2999.24
D8	4	244632	60312.2	64089.9	393331	2013.72
D9	4	254130	65255.9	65555.9	414283	2264.75
D10	4	236234	63678	59904.4	400754	1657.83
D11	4	15332.8	4790.29	4548.04	6766.46	3268.55
D12	4	8457.03	1111.38	698.295	1203.55	289.619
E1	4	4245.91	813.139	635.75	561.581	84.7435
E2	4	427185	103842	86662.5	581147	3863.37
E3	4	242063	60806.6	63590.2	417527	2224.46
E4	4	264965	62799.4	65695.8	398535	2740
E5	4	340059	82772.9	82912.9	488770	2993.3
E6	4	260422	63937.8	69916	411997	2584.35
E7	4	310378	76893.8	80393.7	466476	2818.45
E8	4	306899	78245	81109.2	483298	2842.48
E9	4	293728	75879.9	76540.9	475614	2402.63
E10	4	238933	64954	60443.5	398599	2117.08
E11	4	17371.2	2660.41	2022.3	2284.41	1181.54
E12	4	5149.93	1276.8	948.796	2382.2	2514.66
F1	4	45389.5	7967.57	5869.89	7099.25	4007.12
F2	4	430684	97735.5	91710.2	624061	4021.19
F3	4	252578	62226.4	66841.6	433497	2601.17
F4	4	268505	61579.6	67750.5	418180	3020.85
F5	4	384240	84627.6	109024	671756	3606.57
F6	4	250548	56961.7	80615.5	494742	2828.84
F7	4	295285	65620.2	85133.8	504144	3330.8
F8	4	311795	79553.9	82069.3	490438	4086.58
F9	4	332184	85965.2	85893.1	537435	2652.01
F10	4	271299	74694	67671.8	452993	1656.36
F11	4	17079.7	2759.84	1622.86	2373.07	0
F12	4	0	0	0	0	143.532
G1	4	16690	4494.09	5146.94	10315.9	13357.6
G2	4	502064	121843	99208.6	677149	4181.24
G3	4	320871	78222.8	79111.6	536453	2127.7
G4	4	334990	79034.2	78631.4	496578	3136.08
G5	4	396792	91184.9	103301	645436	3902.14
G6	4	277977	64261.9	82230.1	512798	3235.9
G7	4	303521	67597.5	80040.8	489434	5450.37
G8	4	302143	73483.4	80132.9	497060	3342.75
G9	4	347315	89570.6	86060.9	547944	2861.88
G10	4	255399	68996.1	63698.3	439884	1048.64
G11	4	10749.1	2569.19	2527.35	3992.74	2806.74
G12	4	78926.2	15551.5	12782.2	17689.7	9895.48
H1	4	27340.6	5312	3897.47	5744.4	6369.21
H2	4	475184	118197	90381.1	649132	3849.96
H3	4	313152	80612.9	73101.3	514587	2971.56
H4	4	290665	71699.5	66156.4	436310	2666.67
H5	4	463831	110668	99488.6	614124	4674.63
H6	4	301620	74979.3	74548.6	477520	2671.51
H7	4	363388	90301	86019.5	544697	3207.71
H8	4	316849	81587.6	75163.9	488424	2803.4
H9	4	336272	86340	80718	545419	3577.04
H10	4	287525	79613.5	65600.6	465353	2715.41
H11	4	10373.2	1298.56	477.111	1506.66	1187.91
H12	4	19062.8	3365.13	1427.81	3743.38	3484.38
A1	5	40763.5	5099.46	3201.72	3890.39	1710.58
A2	5	337818	78424.1	65409	538824	3209.58
A3	5	199058	48792.2	47117.9	391359	1701.8
A4	5	224184	52284.6	53293	413398	1743.75
A5	5	227814	52358.8	51591.3	369909	1909.35
A6	5	190984	44040.3	44426.4	318021	1415.22
A7	5	229791	53179.1	53525.8	380051	2380.1
A8	5	239897	56469.4	54232.4	389210	2347.9
A9	5	237781	57196.6	53814.1	401130	2174.68
A10	5	215060	58155.2	47804.2	366196	1868.96
A11	5	0	0	0	0	0
A12	5	0	307.525	85.1694	922.853	139.567
B1	5	0	0	0	219.908	0
B2	5	353437	89626.9	65275.4	479939	3228.97
B3	5	188888	44707.7	44319.7	334145	1255.41
B4	5	197595	45506	45421.3	324714	9123.81
B5	5	242483	54183.7	56947.3	383856	2754.52
B6	5	196278	45592.9	49336.1	330191	2135.69
B7	5	231893	52614.5	56325	376574	2225.82
B8	5	235812	54950.8	53928	359064	2472.49
B9	5	236324	57683.7	55078.2	383237	1870.25
B10	5	194142	51823.9	45693.7	329832	1662.98
B11	5	0	116.8	27.5986	91.4058	0
B12	5	0	48.3788	0	0	0
C1	5	1690.07	526.253	701.585	915.221	238.476
C2	5	354800	81295.1	71950.2	520540	3752.21
C3	5	199809	47549.6	50107.8	356670	2189.42
C4	5	190927	43336.7	47030.1	320430	2217.23
C5	5	262915	58901.3	63699.2	409323	2694.15
C6	5	198378	46077.2	54467.8	353036	2340.6
C7	5	248230	56725.2	63326.4	402267	2648.07
C8	5	231816	56137.6	56950.6	367358	2112.16
C9	5	244640	61922	59053.9	389776	1684.48
C10	5	204051	54428.8	49139.5	341271	1717.02
C11	5	910.79	489.806	260.702	660.782	698.528
C12	5	0	17.3637	0	70.4307	51.6243
D1	5	30443	6361.01	5196.26	6904.51	4502.03
D2	5	377214	85701.3	75141.1	518104	3371.51
D3	5	222165	54555.4	55669.7	375920	2481.39
D4	5	221797	52587.7	54284.9	346055	2306.58
D5	5	316921	70045.4	84001.9	514536	3352.54
D6	5	214076	49274	63913	393628	2273.24
D7	5	273301	60021.1	74620.9	444268	2910.82
D8	5	245574	60709.9	64265.1	393553	1859.01
D9	5	254810	65733.9	65475.5	414634	2498.3
D10	5	237351	64150.2	59818.5	401190	1674.58
D11	5	15109.4	4611.63	4680.42	7079.89	2829.4
D12	5	8278.93	979.306	658.768	1164.06	152.223
E1	5	3864.03	661.444	573.239	706.77	500.26
E2	5	428641	104277	86709.4	581638	3861.09
E3	5	242817	61077.7	63625.5	417702	1933.74
E4	5	265592	63381.2	65757.7	398885	2756.83
E5	5	341412	83453.6	82959.9	489251	3041.1
E6	5	261512	64401.2	70170.1	411979	2789.46
E7	5	311163	77532.4	80637.5	466825	2660.35
E8	5	307788	78084.1	81161.6	483816	2607.47
E9	5	294026	76103.7	76525.4	475706	2334.69
E10	5	239852	65453.9	60509.2	399209	2082.08
E11	5	17529.6	2674.51	1898.41	2597.73	1322.39
E12	5	5199.14	1124.93	969.512	2512.71	2601.57
F1	5	45086.9	8115.65	5874.43	7124.3	4223.64
F2	5	431588	98154.6	92075.6	625589	3926.39
F3	5	254092	62812.7	67132.1	434164	2376.93
F4	5	269660	62011.3	67906.6	417992	3187.42
F5	5	385437	85130.2	109092	672524	3473.67
F6	5	250566	57094.2	80616.4	494960	2813.89
F7	5	296206	65940.2	85086.6	505264	2903.33
F8	5	312799	80171.8	82328.3	491473	4414.48
F9	5	332445	87029.3	85999.2	538406	2576.51
F10	5	272737	75315.3	67837.7	454300	2363.03
F11	5	16925.9	2447.93	1799.37	2483.29	17.3658
F12	5	0	0	0	0	213.15
G1	5	16501.4	4220.72	5136.1	10150.1	13830.2
G2	5	503660	122547	99398.2	678414	4014.38
G3	5	322235	78918	79337.1	537514	2586.07
G4	5	336112	79684.9	79009.7	497487	3020.59
G5	5	398378	91842.1	103236	644500	3987.53
G6	5	279118	64614	82313.2	513397	3101.65
G7	5	303432	68031.2	80238.3	489864	5406.47
G8	5	302761	73590.3	80196.6	496891	3300.96
G9	5	348054	90001.5	86224.5	548097	2831.44
G10	5	256731	69682.5	63686.4	440295	878.416
G11	5	10824.6	2659.71	2655.86	3916.29	2630.26
G12	5	78853.2	15494.3	12628.2	17423.7	10067
H1	5	27876.2	4926.43	3723.34	5994.83	6192.53
H2	5	475875	118867	90432.3	647581	3741.21
H3	5	313800	81319.6	73018.4	513983	2845.62
H4	5	291499	72121.3	66279.1	436469	3007.17
H5	5	464165	110864	99556.6	612470	4805.16
H6	5	302165	75345.9	74452.8	476764	2950.37
H7	5	363716	90861.8	86016.6	544286	3177.75
H8	5	317669	82280.8	75224.1	488169	2902.66
H9	5	336901	87123.9	80812.6	545087	3590.96
H10	5	288552	80034.2	65690	464905	2924.1
H11	5	10266.2	1344.28	420.823	1941.15	1068.32
H12	5	19328.7	3675.12	1931.64	4046.15	3293.07
A1	6	40461.1	4976.36	3004.23	3787.41	1522.62
A2	6	338702	78958.3	65337.9	538624	3062
A3	6	199686	49371.7	47124	391741	1556.63
A4	6	225183	52495.1	53216.1	413427	1864.28
A5	6	228583	52876.3	51450.1	370382	2042.2
A6	6	191364	44135.1	44350.7	318108	1579.78
A7	6	230600	53417.2	53500.9	379430	2211.18
A8	6	240866	56930.2	54214.1	389656	2412.66
A9	6	238560	57387.9	53963.4	400859	2061.89
A10	6	215294	58478	47691.5	365768	2117.55
A11	6	0	0	0	0	0
A12	6	0	185.442	122.076	805.732	114.694
B1	6	0	0	0	0	0
B2	6	353774	90260.3	65293.7	479820	3512.65
B3	6	189213	45302.9	44148.9	334449	1575.15
B4	6	198330	45675	45342.8	324810	9153.13
B5	6	243121	54510.6	56919.4	383760	2613.8
B6	6	196188	46079.6	49214.4	330257	2260.79
B7	6	232461	52879.1	56383.3	376729	2256.4
B8	6	235929	55280	53979	359105	2283.95
B9	6	237050	57991.4	55201.5	383292	1720.76
B10	6	194473	52197.9	45742.8	329658	1830
B11	6	0	0	57.2415	89.3746	7.18452
B12	6	0	60.1785	0	0	0
C1	6	1485.71	725.866	506.7	1020.78	491.704
C2	6	356125	81611.2	72313.4	521032	3797.79
C3	6	200569	48060.6	50040.2	357078	2110.75
C4	6	191352	43592.3	46974.8	320166	2055.09
C5	6	263702	59221.4	63652.7	409664	2566.16
C6	6	198783	46271.2	54574.5	352686	1788.17
C7	6	248692	56887.6	63367.8	402180	2414.2
C8	6	232627	56941.4	57175.6	366919	2034.63
C9	6	245460	62454.6	59003.4	390330	1883.68
C10	6	204723	54801.6	49110.3	341489	1476.2
C11	6	735.006	394.454	358.339	624.298	979.369
C12	6	0	0	0	458.9	143.889
D1	6	29608	6457.26	5146.13	6834.56	4624.04
D2	6	377585	86376.6	75006.1	518758	3627.14
D3	6	223139	54701.7	55580.5	376440	2395.93
D4	6	222590	52972	54308.1	346135	2393.43
D5	6	317925	70711.3	83834.9	515016	3567.44
D6	6	214597	49768.5	63804.6	393705	2252.13
D7	6	273282	60292.4	74737.5	444144	3114.18
D8	6	246175	61152.2	64267.6	394002	2078.11
D9	6	256025	66198.6	65701.8	414782	2305.22
D10	6	237934	64734.4	59856.6	401818	1483.33
D11	6	15138.2	4889.43	4711.34	7044.54	3119.28
D12	6	8504.02	1110.31	655.728	948.818	172.98
E1	6	4059.21	1030.43	666.34	864.287	113.447
E2	6	430137	105174	86662.5	582259	3601.49
E3	6	243830	61585.1	63755	417798	1781.31
E4	6	267258	63556.8	65873.6	399282	3087.83
E5	6	342085	83884.6	82922.9	489195	3156.03
E6	6	262270	64815.8	70041.6	411812	3011.17
E7	6	311897	78243.8	80583.4	467204	2551.04
E8	6	308563	79137.7	81248.4	483917	2944.21
E9	6	295334	76856.2	76673.1	475861	2710.19
E10	6	240943	66015.8	60780.6	399706	1833.49
E11	6	17532.4	2538.25	1872.9	2702.17	1498.23
E12	6	5273.4	1315.65	996.858	2475.65	2431
F1	6	45205.1	8139.53	6069.49	6900.29	3943.35
F2	6	432013	98468	92165.2	625649	3716.9
F3	6	254764	63671.6	67152.4	434508	2323.74
F4	6	270731	62049.8	68057.6	418074	3476.34
F5	6	386387	85725	109136	672642	3506.9
F6	6	251265	57468.2	80666.2	495024	2615.16
F7	6	296949	66213.5	85250.9	505561	3200.74
F8	6	313823	80459.2	82309.3	491668	4342.62
F9	6	333834	87736.9	86034.5	538880	2731.82
F10	6	273466	76253.6	68017.4	454343	2179.7
F11	6	17209	2565.16	1677.89	2688.54	0
F12	6	0	0	0	0	467.554
G1	6	16747.8	4423.28	5067.92	10325.2	13765.5
G2	6	506427	123234	99584.1	679206	4232.77
G3	6	323510	79944.2	79227.5	537840	2007.74
G4	6	337135	80050.2	79065.8	497597	3332.52
G5	6	399374	92431.5	103437	644934	3715.04
G6	6	279319	65025.8	82407.2	513780	3183.13
G7	6	304837	68437.9	80313	490444	5571.8
G8	6	303248	73988.5	80257.4	496873	3339.83
G9	6	349121	90488.1	86205.3	547885	2776.66
G10	6	257460	70504.2	63662.5	440952	1285.43
G11	6	10388.7	2440.41	2699.92	4190.56	2594
G12	6	79100.4	15708.9	12886.5	17441.2	9798
H1	6	28026.1	4808.09	3725.04	6224.54	6661.43
H2	6	477252	119309	90347.4	646419	4022.83
H3	6	314157	81893.5	73375.3	513572	2922.85
H4	6	292480	72260.3	66011.2	436544	2981.78
H5	6	464366	111373	99457.6	612492	4581.39
H6	6	302855	75874.2	74389	475833	2892.28
H7	6	364906	91367.6	85875.3	544007	3387.48
H8	6	318319	82587.4	75034.2	487176	3080.78
H9	6	336736	87056.1	80762.6	544282	3689.46
H10	6	288840	80532.3	65405.7	463964	2635.15
H11	6	10333.6	1532.84	511.956	1604.26	1288.9
H12	6	18756.6	3146.9	1662.06	4292.04	3991.01
A1	7	40673.6	4864.75	3049.11	4008.51	1548.84
A2	7	340066	79327.4	65504.1	538774	2987.68
A3	7	200355	49743.8	47281.3	391379	1778.3
A4	7	225700	52837.1	53471.6	413333	1930.18
A5	7	228864	53244.6	51628.9	369499	2001.7
A6	7	192373	44617.6	44345.1	317566	1474.62
A7	7	230892	53738.4	53622.3	379454	1951.37
A8	7	241294	57325	54121.4	390049	2515.61
A9	7	238536	57665	53791.2	400298	2662.44
A10	7	215608	58760.3	47883	365282	1937.4
A11	7	0	0	0	0	0
A12	7	0	392.519	93.6863	587.013	344.081
B1	7	0	0	0	0	447.602
B2	7	355217	90288.4	65335	479609	3572.48
B3	7	190257	45551	44102.1	334114	1427.05
B4	7	198337	46068.3	45560.2	324712	8906.5
B5	7	244241	54753.2	57208.2	384403	2869.12
B6	7	196986	46402.5	49251.2	330187	2214.79
B7	7	232999	53412.8	56293.6	376402	2270.93
B8	7	236366	55528.1	53993.2	359332	2392.14
B9	7	238066	58549.1	55252.5	383372	1867.78
B10	7	194835	52245.5	45753.6	329528	1835.39
B11	7	0	0	250.432	200.077	40.028
B12	7	0	0	0	0	0
C1	7	1816.46	795.861	736.908	720.256	140.136
C2	7	356732	82502.6	72191.7	521110	3417.6
C3	7	200848	48323.1	50047.7	356521	2071.42
C4	7	192047	44007.4	47017.5	320363	1827.5
C5	7	264128	59891.7	63670.6	409769	2467.7
C6	7	199076	46734.7	54422.8	352439	2003.37
C7	7	248666	57377.9	63375	402714	2888.5
C8	7	233439	57017	57196	366997	2301.85
C9	7	246620	62842.8	59167.9	390062	1941.54
C10	7	205781	55382	49360.6	341209	1591.83
C11	7	727.81	353.302	263.721	629.365	664.827
C12	7	0	0	0	522.728	84.576
D1	7	30157.3	6361.01	4999.3	6929.05	4661.01
D2	7	378812	86448.6	75063	518509	3650.29
D3	7	223931	55226.7	55609.6	376555	2343.03
D4	7	223042	52967.5	54204.6	345970	2280.92
D5	7	319034	71514.3	84146.3	514646	3633.01
D6	7	214975	50130.2	63788.4	393455	2644.6
D7	7	274346	60741.4	74595.6	444591	3325.39
D8	7	246954	61446.2	64262.6	394518	1923.4
D9	7	256927	66659.3	65702.6	415076	2377.73
D10	7	239257	65014.1	60082.3	401951	1777.7
D11	7	15250.4	4700.96	4523.89	6918.4	3268.55
D12	7	8463.59	1113.53	683.092	826.39	104.777
E1	7	4094.57	915.635	711.561	806.759	83.3766
E2	7	431837	105925	87103.4	582737	4151.45
E3	7	244557	62013.3	63655.5	417348	1983.83
E4	7	267218	63949.3	65808.5	398509	2823.03
E5	7	343114	84491.9	83124.1	489487	2961.77
E6	7	262570	65508.7	70157.4	411570	2591.19
E7	7	312740	78728.4	80444.8	467364	2662.3
E8	7	309986	79813.5	81359.3	484149	2836.37
E9	7	295777	77424.9	76663.1	476166	2417.32
E10	7	241650	66428.1	60806.4	399596	1888.23
E11	7	17637.7	2666.05	2009.54	2458.77	1134.88
E12	7	5013.94	1180.55	1027.52	2498.21	2651.12
F1	7	45455.7	8184.11	5773.12	7180.31	3720.9
F2	7	432626	98670.9	92250.1	627036	4049.27
F3	7	255470	63955.9	67201.3	434679	2516.69
F4	7	270308	62495.3	68010.9	417747	3013.65
F5	7	387322	86225.6	109261	675632	3511.18
F6	7	251217	57409.9	80526.3	495555	2629.23
F7	7	297610	66590.1	85367.9	505150	3332.71
F8	7	315397	81038	82447.3	491581	4188.79
F9	7	334614	88268.4	86005.6	538595	2728.58
F10	7	274906	76625.9	67936.6	454889	2041.14
F11	7	17393.8	2500.63	1720.46	2418.57	0
F12	7	0	0	0	0	458.96
G1	7	16703.6	4752.64	4816.93	10491.1	13774.5
G2	7	508247	124443	99786.2	679089	4274.48
G3	7	323997	80174.2	79533.7	538124	2373.93
G4	7	338142	80556.3	79051.1	497665	3253.55
G5	7	400064	92859.2	103410	644539	3720.8
G6	7	280070	65445.5	82429.1	514170	3338.67
G7	7	305771	68836.4	80328.7	490667	5492.4
G8	7	304030	74286.5	80383.9	497469	3128.97
G9	7	350091	91331.7	86240.6	548492	3005.93
G10	7	258104	70942.8	63921	441096	1381.46
G11	7	10188.4	2836.94	2647.3	3696.63	2509.39
G12	7	79256.8	15578.7	12611.3	17578.5	9904.11
H1	7	27884.2	4655.39	3861.62	5756.49	6391.3
H2	7	478407	120204	90221.6	646219	3728.61
H3	7	315492	82265.1	73265.9	513839	2830.17
H4	7	292527	72693.3	66086.1	436116	3057.03
H5	7	466089	112391	99508.6	612362	4687.39
H6	7	303497	76370.7	74236.4	476041	2952.16
H7	7	365553	92169.3	86162.8	544253	3048.25
H8	7	319587	83008.4	75202.8	487503	3167.05
H9	7	337274	87187.4	80532	544256	3663.76
H10	7	289908	80982.7	65727.3	463487	2798.15
H11	7	10260.3	1462.85	582.987	1391.69	1239.73
H12	7	19585.7	3104.07	1877.72	4172.77	3719.98
A1	8	40702.3	5102.74	2887.53	3987.31	1170.01
A2	8	340859	79877.7	65614.5	538749	3114.02
A3	8	200531	50026.8	47142.3	391525	1533.09
A4	8	226166	53076	53357.6	413234	1738.55
A5	8	229322	53397.9	51531.7	370055	1951.47
A6	8	191976	44976.5	44419.2	317801	1385.52
A7	8	231190	54265.3	53529.9	379848	2478.23
A8	8	241930	57836.9	54350	389243	2464.13
A9	8	239141	57924.8	53888.8	400714	2513.02
A10	8	215918	59094.2	47911.9	364611	1985.71
A11	8	0	0	0	0	0
A12	8	0	100.448	96.5253	894.631	344.081
B1	8	0	0	0	210.347	0
B2	8	356370	91258.3	65455.4	479772	3476.08
B3	8	190102	45783	44101.1	334516	1415.28
B4	8	198701	46491.4	45484.3	324587	9043.61
B5	8	245052	55295.6	57242.8	384625	2445.28
B6	8	197745	46604.9	49388.1	329892	1952.47
B7	8	233040	53609.1	56339.2	376170	2394.03
B8	8	236923	55933.3	54083.4	358750	2254.52
B9	8	237737	58904.8	55305.9	383623	1931.85
B10	8	195162	52666.2	45657.1	329114	1948.53
B11	8	0	14.6	18.3991	80.234	129.321
B12	8	0	0	0	0	0
C1	8	1634.95	942.33	557.858	648.23	264.291
C2	8	358006	82778.4	72332.3	521159	3430.03
C3	8	201841	48622.8	49991.4	357120	2351.42
C4	8	192628	44257.4	47178.8	319728	2521.98
C5	8	265389	59990.3	63808.3	409677	2764.86
C6	8	199646	46969.2	54483	352309	2321.33
C7	8	249322	57506.1	63124.3	402040	2608.68
C8	8	233426	57548.1	57179.7	367201	2116.28
C9	8	246996	63269	59168.7	390435	1860.53
C10	8	205733	55651.4	49303.8	341386	1817
C11	8	630.152	446.647	283.853	604.028	545.342
C12	8	0	23.1516	0	268.517	237.252
D1	8	30200	6459.73	5142.55	6932.74	4603.09
D2	8	379755	87069.4	75115.8	518871	3480.2
D3	8	224294	55748.8	55439.1	376417	2568.88
D4	8	223244	53333.6	54266.5	346160	2227.62
D5	8	319543	71706.6	84057.9	515229	3548.27
D6	8	215916	50408.4	63727.5	393468	2408.54
D7	8	274689	61175.5	74706.4	444163	3300.83
D8	8	247257	62237.5	64355.2	394306	1882.43
D9	8	257306	67110.1	65729.4	415120	2576.72
D10	8	239508	65740.4	60176.1	402021	1711.6
D11	8	15089.6	4773.6	4435.96	7008.22	3177.06
D12	8	8410.05	917.025	772.279	1017.93	0
E1	8	4012.54	785.806	539.988	754.71	560.4
E2	8	432651	106222	87082.1	583038	3762.03
E3	8	244912	62426.8	63718.6	418105	1819.42
E4	8	267316	64337.5	65804.1	399153	2883.62
E5	8	344579	85063.9	83060	489632	3134.67
E6	8	262983	65657	70116.5	411504	2596.07
E7	8	312923	79024.1	80647.3	467023	2488.59
E8	8	310605	80395.2	81351.2	484483	2924.88
E9	8	296323	77676.9	76449.8	475854	2352.13
E10	8	242159	66785.6	60882.7	399639	2352.21
E11	8	17572.4	2530.73	1868.35	2535.77	1209.35
E12	8	5147.25	1420.73	1038.29	2137.29	2440.75
F1	8	45293.4	7983.49	5829.07	7062.4	4145.04
F2	8	433030	99280.7	92340.9	626389	4085.55
F3	8	256456	64453.8	67373.7	434804	2227.78
F4	8	271053	62875.8	68012	418039	3217.24
F5	8	387739	86729.2	109066	676083	3485.46
F6	8	251648	57572.9	80776.4	495134	2907.98
F7	8	298158	66890	85290.5	505825	3261.95
F8	8	315696	81457.4	82315.3	491729	4526.81
F9	8	336235	88915.5	86133	539260	2672.5
F10	8	275930	77123.8	68207.7	455071	1877
F11	8	17070.1	2661.96	1871.02	2734.04	127.69
F12	8	0	0	0	0	350.666
G1	8	16700.2	4373.87	4911.44	10346.9	13905.4
G2	8	509910	125174	99686.4	679671	4505.14
G3	8	325258	80898.4	79266.6	538184	2267.86
G4	8	338686	80732.2	79220.5	497728	3360.16
G5	8	400877	93470.3	103379	644445	3940.51
G6	8	280344	65521.1	82336	514248	3395.15
G7	8	306276	69237.7	80276.1	491158	5220.58
G8	8	304066	74659.2	80262.3	497338	3521.55
G9	8	350861	91692.9	86405.3	548459	2902.46
G10	8	258804	71388	63782	440621	1416.38
G11	8	10997.6	2602.34	2485.74	4142.02	2751.14
G12	8	78932.1	15514.4	12653	17446.1	9978.14
H1	8	27804.2	5386.44	3737	5917.11	6328.44
H2	8	480719	120814	90478.9	644348	4059.46
H3	8	315942	82926.3	73419.8	512786	2516.5
H4	8	293243	73183.1	65955	436730	2978.96
H5	8	466333	112720	99614.5	611321	4695.24
H6	8	304393	76782.3	74303.8	475427	2826.14
H7	8	366007	92662.6	86271.4	544157	3058.88
H8	8	320022	83527.9	75206.5	486895	3037.18
H9	8	337816	87729.1	80606.4	543736	3827.57
H10	8	289790	81531.2	65661.5	463565	2711.71
H11	8	10103.5	1628.56	474.431	1347.57	1658.29
H12	8	19190.1	3489.53	1624.88	4082.85	3365.7
A1	9	40763.5	4978	2981.79	4016.08	1566.33
A2	9	342215	80134.5	65543.4	538197	3148
A3	9	201703	50544.1	47274.2	391729	1590.96
A4	9	227125	53482	53350.5	412981	1781.04
A5	9	230238	53708.6	51481.9	369803	2000.08
A6	9	192638	44878.6	44342.7	317262	1375.08
A7	9	232109	54496.3	53721.2	379407	2228.88
A8	9	242651	57867.4	54388.9	389253	2486.55
A9	9	239017	58047.7	53741.4	400124	2323.12
A10	9	216326	59402.8	47788.2	364616	2080.31
A11	9	0	0	0	0	0
A12	9	0	356.976	2.83898	259.641	425.61
B1	9	0	0	0	87.417	110.568
B2	9	356328	91613.6	65368.2	479908	3181.33
B3	9	190766	45984.8	44137.7	334277	1412.33
B4	9	198864	46567.8	45448	324890	9144.51
B5	9	245429	55440.8	57203.1	384464	2733.46
B6	9	197979	46756.3	49220.8	329354	2126
B7	9	233770	53978.4	56377.3	376303	2429.21
B8	9	237302	56122.2	54066.1	358738	2306.23
B9	9	238484	59196.3	55296.9	383717	1772.5
B10	9	195370	52675.2	45657.1	328786	1928.78
B11	9	0	0	27.5986	550.466	0
B12	9	0	22.4194	0	0	0
C1	9	1780.16	484.775	495.738	407.317	253.228
C2	9	358807	83325.5	72298.7	521222	3871.34
C3	9	202230	48846.2	50153.7	356335	2004.94
C4	9	192669	44534.8	47258.5	320325	2271.93
C5	9	265405	60309.5	63818.1	409651	2859.74
C6	9	200249	47006.4	54382.7	352007	2465.87
C7	9	249813	57771	63223	402286	2568.47
C8	9	234157	57879.1	57143	367248	2080.82
C9	9	247587	63684.2	59160.5	390504	1909.3
C10	9	206418	55721.8	49252.2	341476	1648.34
C11	9	519.13	283.043	279.826	502.681	557.597
C12	9	0	0	0	460.001	197.71
D1	9	30084.9	6357.31	5047.05	6849.28	4774.4
D2	9	380384	87043.6	74975.7	518029	3445.98
D3	9	224632	56034.5	55508.3	376511	2108.01
D4	9	223866	53674.3	54396.2	345614	2271.05
D5	9	320205	72220.8	84096.2	515092	3645.12
D6	9	216126	50455.1	63797.9	393148	2428.69
D7	9	274873	61524.6	74593.7	443626	2894.12
D8	9	248158	62215.6	64411.1	394370	1880.75
D9	9	257718	67346.6	65726.1	414874	2417.36
D10	9	240324	65949.6	60017.7	402026	1736.28
D11	9	15117.4	4774.58	4561.57	7017.78	2886.22
D12	9	8321.55	1011.52	696.268	1258.84	288.63
E1	9	3950.31	768.04	506.738	836.893	349.908
E2	9	433560	106417	87026.3	582902	3873.62
E3	9	245671	62820.3	63646.9	417860	2322.45
E4	9	267990	64866.5	65706.9	399228	2941.96
E5	9	344461	85610.2	83218.1	489765	3175.35
E6	9	263696	65996.1	69959.8	411489	2861.73
E7	9	313888	79335.8	80689.6	467177	2669.13
E8	9	311077	80798.4	81398.7	484578	2877.07
E9	9	296743	77915.3	76783.4	475483	2397.12
E10	9	242709	67014.7	60707	399963	1971.69
E11	9	17687	2469.64	1957.62	2786.25	1341.23
E12	9	5408.5	1129.34	1034.98	2380.59	2543.9
F1	9	45247.7	8114.05	5939.45	6950.39	3962.63
F2	9	434428	98901.7	92265.4	626707	3757.87
F3	9	256927	64828.5	67308.8	434698	2144.35
F4	9	271537	63172.5	67864	417239	3089.74
F5	9	388817	86933.9	109254	675713	3849.87
F6	9	251309	57497.7	80638.2	495241	2835
F7	9	298508	67105.7	85055.5	505812	3426.43
F8	9	316158	82003.9	82561.3	491901	4130.09
F9	9	335794	89326.1	86023.8	538630	2908.69
F10	9	276512	77531.3	68048.2	455754	2045.4
F11	9	17060.5	2513.54	1536.68	2548	0
F12	9	0	0	0	0	303.395
G1	9	16669.6	4461.15	5041.58	10618.2	13765.5
G2	9	511294	125967	99661.5	679819	4035.24
G3	9	325952	81573.3	79643.4	538558	2391.61
G4	9	338679	80757.6	79082.6	497892	3004.79
G5	9	401473	94024	103564	644466	3804.27
G6	9	281072	65641.1	82374.3	514096	3103.5
G7	9	306426	69209.8	80412.7	491282	5609.16
G8	9	303978	74575.9	80286.4	497711	3143.54
G9	9	350931	92111.6	86441.6	548512	2895.35
G10	9	259584	71747.1	63847.1	440585	1513.49
G11	9	10483.7	3007.8	2515.11	3898.08	2567.41
G12	9	79361.1	15726	12670	17208.9	9784.43
H1	9	28126	5044.77	3847.96	5993.11	6515.32
H2	9	481161	121030	90270.5	645257	4214.01
H3	9	316754	83194.3	73122.9	512956	2856.31
H4	9	293775	73381.7	66024.3	436290	3182.13
H5	9	466893	113023	99388.6	613010	4641.26
H6	9	303652	77180.8	74357.9	475491	2768.04
H7	9	366638	92950.7	86113.7	544309	2979.63
H8	9	320179	83978.5	75214.8	486673	2660.54
H9	9	337237	87890.6	80656.4	543199	3646.63
H10	9	290978	82319.7	65591.9	463481	3036.47
H11	9	10437.6	1352.85	416.802	1244.64	1465.62
H12	9	19187.9	3524.2	1660.2	3244.26	3936.1
A1	10	41004.6	4935.33	2684.06	3897.96	1556.13
A2	10	342078	80625.2	65413.3	537934	3261.6
A3	10	201655	50494.3	47066.2	391019	1913.66
A4	10	227234	53530	53438.9	412734	1559.06
A5	10	230333	54008.7	51526.8	369886	2089.99
A6	10	192764	45100.8	44322	317552	1466.6
A7	10	232635	54592.8	53740.5	379411	2231.29
A8	10	242808	58146	54326.8	389073	2509.79
A9	10	239370	57933.4	53750	400135	2340.48
A10	10	216258	59283.4	47714.5	364287	2150.76
A11	10	0	0	0	0	0
A12	10	0	364.703	229.957	632.168	147.858
B1	10	0	0	0	0	0
B2	10	357418	91808.7	65372.8	479457	3735.37
B3	10	191443	46137.1	44245.5	334349	1800.73
B4	10	199662	46781.9	45473.9	324636	9003.94
B5	10	245708	55770.2	57089.1	384539	2623.92
B6	10	197935	46989.6	49194.3	329600	2109.05
B7	10	233788	54336.8	56314.5	376676	2186.82
B8	10	237451	56501.5	53926.4	358816	2384.19
B9	10	239574	59402.3	55266.5	383259	1707.62
B10	10	195518	52725.4	45624	329001	2033.83
B11	10	0	0	69.5076	0	0
B12	10	0	0	0	0	0
C1	10	1936.12	543.104	769.795	715.288	606.025
C2	10	360142	83384.3	72234.7	521237	3702.49
C3	10	202302	49141.2	50200.6	356583	2210.02
C4	10	193170	44664	47184.7	320175	2088.3
C5	10	266319	60590.6	63881.6	410041	2737.11
C6	10	200140	47251.7	54409.2	352112	2302.06
C7	10	249984	57786.1	63185.6	402288	2659.55
C8	10	234221	58031.9	57220.4	367532	2017.31
C9	10	248050	63754.8	59097.8	390645	1653.9
C10	10	206779	55987.8	49244.5	341425	1464.03
C11	10	636.32	403.487	333.175	577.678	846.608
C12	10	0	0	0	170.574	4.39356
D1	10	30154.7	6401.73	5228.49	6825.96	4479.85
D2	10	380848	87426.6	75023.4	518514	3465.1
D3	10	225051	56339	55479.2	376855	2362.36
D4	10	224736	53927.8	54296.5	345762	2322.37
D5	10	320830	72428.7	84027.4	515022	3367.68
D6	10	216999	50625.6	63732.3	393001	2592.78
D7	10	275521	61403.3	74612.1	443915	3253.68
D8	10	248150	62373.6	64245.1	394618	2075.6
D9	10	258295	67903.6	65560.9	414962	2629.84
D10	10	241288	66250.5	60193.8	402166	1647.26
D11	10	15294.1	4621.45	4466.88	6816.15	3268.55
D12	10	8531.33	1189.77	693.227	892.541	261.942
E1	10	3666.02	843.205	554.618	901.269	278.833
E2	10	433488	107255	87241.7	583684	4048.97
E3	10	245396	63061.8	63761.4	417457	1802
E4	10	268904	64793.5	65810.7	398935	2490.91
E5	10	344796	85676	83084	490344	3020.76
E6	10	263467	66231	70028.9	410943	3005.31
E7	10	314291	79638.1	80607	466792	2619.36
E8	10	311808	80999.5	81316	484438	2777.37
E9	10	297255	78171	76802.5	475403	2594.51
E10	10	243389	67357.2	60805.5	400000	2059.64
E11	10	17595.7	2470.58	1917.54	2438.41	1327.77
E12	10	5297.56	1211.46	1030.83	2371.72	2299.42
F1	10	45189.4	8063.1	5939.45	6960.71	3869.2
F2	10	433950	98952.8	92271.3	626807	4036.4
F3	10	256820	65030.6	67338.6	435138	2340.42
F4	10	272205	63307.5	68055.5	417592	3124.7
F5	10	389007	87230.8	109254	675163	3895.96
F6	10	251727	57653.9	80533.3	495228	2603.73
F7	10	298927	67429.3	85168.8	505712	3529.71
F8	10	316950	82324.5	82291.3	492586	4419.54
F9	10	337325	89676.2	85896.4	539510	2941.04
F10	10	277391	77763.2	68315.1	455552	1799.19
F11	10	17127.8	2452.23	1685.16	2590.46	221.67
F12	10	0	0	0	0	519.123
G1	10	17305.2	4673.59	4971.86	10447.7	14016.8
G2	10	512900	126459	99773.8	680070	4161.61
G3	10	326591	81925.9	79298.1	538642	2185.79
G4	10	339486	81283.2	79119	498503	3089.69
G5	10	401592	94288.1	103539	644766	3902.14
G6	10	280944	66063.5	82658.2	513947	3346.08
G7	10	306997	69127.1	80470.8	491233	5400.86
G8	10	303815	74559.9	80387.7	497479	3006.53
G9	10	351799	92524.4	86340.6	547739	3042.46
G10	10	260055	71938	63886.2	440663	1214.51
G11	10	10629.4	2708.16	2528.58	3626.24	2589.16
G12	10	78434.6	15613	12796.5	17377.5	10435.9
H1	10	28062.1	5016.14	3899.18	5766.85	6321.64
H2	10	481256	121559	90150.6	644874	4022.83
H3	10	316759	83697.4	73275.5	512834	2880.08
H4	10	294545	73722.1	65947.5	436346	2902.77
H5	10	467908	113225	99257.7	611870	4777.68
H6	10	304662	77370.7	74267.4	474968	3007.57
H7	10	366850	93275.4	86132	543582	3059.84
H8	10	320815	84354	75177.8	486770	2851.64
H9	10	337621	87695.7	80677.6	542866	3748.35
H10	10	290794	82105.5	65588.2	463027	2838.9
H11	10	10338	1455.7	384.637	1312.82	1173.3
H12	10	19011.4	3073.48	1561.67	3785.58	3429.47
A1	11	40514.7	4956.67	2963.83	4070.6	1529.9
A2	11	342748	80984	65395.8	537296	2863.46
A3	11	202347	50898.6	47191	391126	1635.1
A4	11	228280	53949.2	53530	412742	1813.99
A5	11	231177	54379.4	51561.9	369719	1992.78
A6	11	193412	45260.8	44334	317199	1428.87
A7	11	232908	54868.9	53628.8	379256	2146.83
A8	11	243260	58495.4	54211.6	389137	2435.07
A9	11	239498	58090.5	53811.3	400034	2202.63
A10	11	216680	59521.2	47952.7	363742	2046.09
A11	11	0	0	0	0	0
A12	11	0	227.166	281.059	856.532	236.296
B1	11	0	0	0	168.004	139.876
B2	11	357728	91996.9	65325.8	479551	3636.75
B3	11	191369	46549.7	44342.1	334315	1595.74
B4	11	199759	46911	45392.8	324432	8956.51
B5	11	246268	56036	57081.5	384702	2518.59
B6	11	198456	47185	49352.9	329406	2201.07
B7	11	234941	54498.9	56310.8	375706	2582.13
B8	11	237957	56651.8	54044.2	358768	2443.06
B9	11	239453	59623.7	55193.3	383080	2032.05
B10	11	196111	53021.4	45544.5	328439	1763.55
B11	11	0	211.701	73.5962	163.515	0
B12	11	0	176.995	0	0	0
C1	11	1481.67	784.195	528.625	736.399	430.241
C2	11	359991	83811.5	72126.6	521727	3749.1
C3	11	202676	49120.7	50256	356376	1959.05
C4	11	193590	44756.5	47209	319196	2030.67
C5	11	266653	60681.4	63631.3	409814	2731.74
C6	11	200380	47532	54335.3	351566	2361.48
C7	11	250397	58166.3	63172	402067	2702.23
C8	11	234655	57916.9	57311.7	367545	2088.24
C9	11	248435	64101.7	59189	390061	1746.47
C10	11	207252	56443.6	49157.6	341585	1671.81
C11	11	562.305	396.462	377.464	711.456	598.447
C12	11	0	0	0	451.197	109.839
D1	11	30501.1	6520.19	5091.22	7017.42	4725.1
D2	11	381613	87644.8	74918.8	518826	3229.6
D3	11	225734	56379.5	55595.5	376655	2029.67
D4	11	224961	54154.9	54199.8	345483	2458.57
D5	11	321815	72883.1	84063.8	514989	3609.81
D6	11	217292	50951.4	63886.4	392591	2335.61
D7	11	276406	61727.3	74647.1	444059	3090.6
D8	11	248738	62789.9	64311	394638	1898.31
D9	11	258957	68094.8	65757.9	414985	2346.53
D10	11	241314	66753.5	60195.6	401781	1604.07
D11	11	15269.3	4850.16	4614.71	6792.26	3128.91
D12	11	8560.83	934.206	661.809	1087.04	222.404
E1	11	4220.45	1124.73	454.867	679.376	224.16
E2	11	434939	107494	87058.7	583545	3741.54
E3	11	246453	63293.9	63722.9	416960	1884.75
E4	11	268843	65166.9	65873.6	397881	2634.53
E5	11	345191	86105	83290.2	489949	3395.05
E6	11	264017	66472.4	69895.6	411063	2737.69
E7	11	314653	79658	80399.6	466603	2533.48
E8	11	312044	81391.9	81586.2	484760	2517.94
E9	11	297522	78170.1	76551.9	475331	2445.78
E10	11	243607	67887.2	60949.2	400386	2200.54
E11	11	17510.9	2598.39	1953.98	2474.7	1387.88
E12	11	5367.35	1267.97	971.998	2229.13	2431
F1	11	44927.8	8055.14	5844.19	6869.34	3965.6
F2	11	434011	98870.1	92190	625983	4009.48
F3	11	257994	65074.8	67382.2	435201	2420.73
F4	11	272337	63545.1	67995.7	417491	3126.76
F5	11	389946	88007	109057	674779	3833.79
F6	11	251697	57701.2	80602.4	494745	2639.78
F7	11	298742	67559.1	85196.1	505881	3173.01
F8	11	317235	82594.3	82518.3	492078	4450.91
F9	11	338028	90054.9	86278.7	538893	2849.37
F10	11	277553	78261.1	68033.4	454996	1897.25
F11	11	17061.5	2610.34	1713.2	2478.23	0
F12	11	0	0	0	0	283.627
G1	11	16521.8	4643.95	4998.2	10402.7	13685.7
G2	11	514497	126908	99883.6	679610	4281.85
G3	11	326932	82202.7	79397.6	538962	2016.58
G4	11	339707	81489.3	79009.7	498718	2895.22
G5	11	402310	94191.3	103520	644359	3556.73
G6	11	281154	65838.5	82343.3	513581	3337.75
G7	11	307609	69621	80436.7	491610	5292.51
G8	11	303852	74782.2	80141.6	497208	3102.73
G9	11	352511	92761.1	86472.9	548062	2756.37
G10	11	260388	72303.6	64024.1	440480	1372.73
G11	11	10395.2	2853.52	2550.61	3939.35	2454.99
G12	11	78591	15660.2	12778.3	17253.8	9922.62
H1	11	27508.5	5184.11	3583.35	5825.58	6663.12
H2	11	482546	122009	90417.2	643233	4310.17
H3	11	317670	83894.6	73019.6	513120	3117.71
H4	11	294794	73920.6	66174.2	435719	2825.63
H5	11	467183	113684	99424.6	610257	4738.43
H6	11	304979	77746.2	74229.3	475038	2899.43
H7	11	368035	93623.2	85976.3	542866	3199.02
H8	11	321007	84624.4	75182.4	486402	2802.48
H9	11	337468	87850.8	80271.6	542874	3593.1
H10	11	292115	82287.4	65531.1	463122	2653.67
H11	11	10862.7	1351.42	281.442	1568.16	835.79
H12	11	19650.5	3346.77	1608.15	3785.58	3649.13
A1	12	40709.9	5165.11	2956.35	3900.99	1830.05
A2	12	344056	81098.6	65591.5	537378	2873.01
A3	12	203018	51152.6	47225.5	391169	1598.81
A4	12	227874	54209.5	53500.8	412842	1932.78
A5	12	231449	54583.8	51575	369692	1790.27
A6	12	193810	45444.2	44404.1	316932	1437.7
A7	12	233169	54891.9	53574.9	379163	2228.07
A8	12	243810	58819.4	54451	389014	2307.22
A9	12	239949	58086.7	53693.6	399936	2451.33
A10	12	216669	59736.8	47575.9	363584	2086.35
A11	12	0	0	0	0	0
A12	12	0	111.265	70.9745	681.556	355.135
B1	12	0	0	0	248.592	35.968
B2	12	357624	92269.2	65354.5	478851	3161.38
B3	12	191764	46741.4	44235.3	334124	1537.88
B4	12	200164	47227	45372.1	324488	9255.75
B5	12	246548	56106.1	57147.4	384590	2728.4
B6	12	198478	47277.7	49317.6	329024	1931.48
B7	12	235044	54606.5	56267.4	375926	2273.99
B8	12	238259	56823.2	54113.2	358581	2192.47
B9	12	239965	59959.9	55273.9	382748	1825.07
B10	12	196042	53324.7	45643.7	327949	1465.44
B11	12	0	140.786	111.417	326.014	0
B12	12	0	0	0	52.3448	0
C1	12	1812.43	728.459	738.126	732.674	586.357
C2	12	360508	84347.7	72407.9	521246	3528.45
C3	12	202923	49414.8	50082.4	356589	2460.05
C4	12	193824	45049.9	47057.4	319531	1991.6
C5	12	267227	61222.9	63929	409744	2713.84
C6	12	201128	47757.9	54360.2	351458	2019.42
C7	12	250534	58086.7	63313.7	401879	2674.33
C8	12	235011	58157.2	57204.1	367174	2190.51
C9	12	248668	64493.1	59129.6	390058	1914.26
C10	12	207149	56595.3	49326.2	341371	1406.65
C11	12	845	355.31	269.761	553.355	535.13
C12	12	0	0	0	652.585	429.47
D1	12	30218.1	6322.76	5043.47	6925.37	4572.28
D2	12	381846	87656.1	75067	517796	3329.24
D3	12	226008	56659.3	55668.7	376253	2245.36
D4	12	225177	54204	54264.6	345660	2531.61
D5	12	321645	73050.5	83981.2	515173	3324.29
D6	12	217038	51314.9	63707.6	391550	2316.42
D7	12	276125	61966.1	74682.1	443329	3210.45
D8	12	248708	62700	64386.9	394156	2284.67
D9	12	259343	68347	65924.7	415202	2409.77
D10	12	242048	66844.4	60098.2	401953	1715.12
D11	12	15079.7	4801.08	4600.22	6789.4	3094.24
D12	12	8470.15	1055.55	805.725	1229.22	49.423
E1	12	3692.89	963.467	509.398	649.243	415.516
E2	12	435054	107399	87229.5	583358	3961.29
E3	12	246169	63443.7	63655.5	417364	1969.68
E4	12	269208	65153.2	65788.6	398734	2858.93
E5	12	345376	86250.9	83274.2	489887	3598.46
E6	12	264196	66905.5	69885.9	410225	2732.81
E7	12	314642	79969.7	80514.6	466752	2721.83
E8	12	312557	81504.7	81618.5	484184	2908.6
E9	12	297561	78478.6	76669.4	475246	2385.18
E10	12	243908	67933.2	60939.4	400200	1973.49
E11	12	17604.1	2509.11	1994.06	2533.12	1366.35
E12	12	5278.77	1266.2	1001	2387.03	2446.44
F1	12	45417.9	8209.59	5959.11	6898.81	4327.45
F2	12	434726	98856.8	92277.2	626300	3713.39
F3	12	258382	65106.4	67309.9	435082	2222.57
F4	12	272186	63592.4	67872.1	417249	3146.29
F5	12	390081	87861.1	108810	673608	3701.96
F6	12	251731	57544.2	80661.8	495031	2783.12
F7	12	299113	67433	85307.5	505551	3167.27
F8	12	317863	82967.8	82469.3	491961	4172.6
F9	12	338022	90521.7	86274.4	538542	2787.9
F10	12	278396	78295.1	68319.4	455275	1881.26
F11	12	17204.7	2765.21	1655.05	2676.41	0
F12	12	0	0	0	0	266.437
G1	12	16640.8	4548.43	5029.19	10446.1	13297.4
G2	12	514552	127220	99777.5	680505	4300.25
G3	12	328084	82407.4	79601.8	538868	2198.41
G4	12	340127	81421.9	79125	498359	3185.44
G5	12	402673	94615.3	103484	642978	3784.12
G6	12	281382	66162.2	82281.2	513994	3132.2
G7	12	307453	69830.6	80312.1	491450	5556.85
G8	12	304075	74852.2	80147.4	497033	3098.84
G9	12	352821	93107	86150.8	548264	3033.33
G10	12	260670	72522.9	63914.4	440239	1450.2
G11	12	10496.7	2607.44	2655.86	3918.71	2791.03
G12	12	79113.8	15628.8	12693.5	17765.8	9979.38
H1	12	27848.2	5103.94	3830.89	6316.08	6709
H2	12	483227	122023	90180.9	642703	3872.86
H3	12	318826	84447	72989.5	512780	3049.98
H4	12	294771	74220.4	66088	435845	3001.53
H5	12	467744	113994	99296.7	610677	4650.1
H6	12	305474	77876	74301.1	474866	2945.9
H7	12	367827	94050.1	86090.7	543352	2937.1
H8	12	321746	84695.9	75270.4	486250	3269.09
H9	12	337213	88058.6	80493.7	542204	3761.19
H10	12	292338	83198.5	65425.5	462889	2848.78
H11	12	10880.2	1305.7	549.482	1554.79	1375.27
H12	12	18890.7	3189.73	1738.29	4141.57	3480.84
A1	13	41592.1	4938.61	2933.91	4103.92	1037.42
A2	13	344272	81400.1	65581.7	537463	3068.37
A3	13	202688	51434.5	47115.9	390631	1694.93
A4	13	228467	54680.3	53467.2	412450	1707.34
A5	13	231773	54628.4	51658.3	369588	1944.18
A6	13	193781	45493.9	44255.1	316815	1453.75
A7	13	233204	55081.8	53562.8	378615	2277.94
A8	13	243971	58933.1	54384.8	388817	2234.16
A9	13	239941	58287.6	53802.7	399723	2561.22
A10	13	216214	59850.1	47638.7	362645	1766.3
A11	13	0	0	0	0	0
A12	13	0	171.534	44.0042	660.39	386.918
B1	13	0	0	0	0	0
B2	13	357983	92812.6	65413	479037	3305.43
B3	13	192221	46869.5	44220.1	334323	1906.65
B4	13	200381	47397.8	45433.4	323727	9046.2
B5	13	246350	56064	57095.9	384507	2717.45
B6	13	198742	47392.8	49357.7	329065	2184.92
B7	13	235211	54768.7	56294.3	375955	2374.92
B8	13	238389	56921.9	53957.1	358184	2296.68
B9	13	240442	60005.5	55330.6	382960	1986.06
B10	13	196153	53345.3	45458.8	327869	1802.17
B11	13	0	18.7715	188.079	57.8903	0
B12	13	0	0	0	0	0
C1	13	1782.85	648.095	611.451	764.961	549.479
C2	13	361479	84261.6	72269.3	521038	3752.21
C3	13	202987	49475.3	50180.9	356322	2210.02
C4	13	194351	45299	47025.3	319185	2296.35
C5	13	267496	61128.6	63867.3	409447	2772.02
C6	13	201052	47736.2	54003.8	350982	1978.47
C7	13	250640	58187.6	63176	401774	2616.06
C8	13	234921	58450.3	57018.3	367092	2073.39
C9	13	249027	64372.4	59121.4	389534	1447.27
C10	13	207747	56796.1	49296.1	341298	1470.99
C11	13	664.075	360.328	241.577	529.031	591.298
C12	13	0	131.964	0	360.957	65.9034
D1	13	30273.6	6631.25	5167.61	6882.42	4487.24
D2	13	382382	87942.3	74775.6	517654	3517.44
D3	13	225987	56972.7	55696.8	376095	2208.73
D4	13	225237	54543.8	54142.7	344933	2390.47
D5	13	322641	73155.4	84072.6	514971	3607.79
D6	13	217332	51347.2	63574.4	392074	2468.03
D7	13	276492	62006.9	74709.3	443712	3393.18
D8	13	249473	63028.1	64258.5	394083	1802.14
D9	13	259176	68702.9	65700.1	414182	2306.06
D10	13	241604	67106.5	60053.1	401854	1622.58
D11	13	15232.5	4666.6	4528.72	7081.8	3232.92
D12	13	8543.35	1019.04	690.187	1161.09	406.257
E1	13	4275.61	944.334	522.698	630.067	295.235
E2	13	435561	107707	87323.2	583309	3846.29
E3	13	246966	63697.9	63657.6	416321	2171.11
E4	13	269627	65223	65678.2	397948	2874.64
E5	13	345856	86268.1	83116.1	490114	3287.23
E6	13	264737	66749.8	69605.6	410089	2746.48
E7	13	314950	80266.4	80503.8	466360	2655.47
E8	13	312828	81915.7	81407.7	483940	2786.52
E9	13	298238	78450.4	76727.8	475190	2735.89
E10	13	243983	68189.8	60907.5	399830	2039.9
E11	13	17784.9	2486.56	1908.43	2498.6	1339.43
E12	13	5050.62	1374.81	938.853	2375.75	2738.84
F1	13	45016	8118.83	5960.62	7010.82	3750.56
F2	13	434463	99059.6	92028.5	626672	3929.9
F3	13	258460	65600.1	67399.2	434647	2269.5
F4	13	272209	63983.7	67887.3	416933	3130.87
F5	13	390520	88151.9	109137	672788	3880.95
F6	13	251157	57622.7	80528.9	494966	2599.33
F7	13	299258	67674.3	85299	505512	2999.92
F8	13	318120	83162.4	82408.3	491068	3996.51
F9	13	338529	90533.4	86457.5	538168	2990.65
F10	13	278731	78374.9	68257.7	455532	1981.45
F11	13	17272	2570.54	1642.59	2642.03	15.3228
F12	13	0	0	0	0	422.002
G1	13	16803.9	4714.76	5046.23	10399.6	13931
G2	13	515328	127095	99999.6	680484	4475.69
G3	13	327879	82612.2	79537.5	539162	2505.26
G4	13	340210	81468.8	78969.3	498274	2938.66
G5	13	403102	94983.8	103360	643857	3629.65
G6	13	281443	66474.3	82367	514172	3269.23
G7	13	307564	69975.5	80398.8	491488	5056.19
G8	13	304212	74786.9	80258.4	496795	3102.73
G9	13	352959	93266.8	86464.9	547956	3155.06
G10	13	261215	72783.7	63660.3	440560	1274.52
G11	13	10629.4	2708.16	2526.13	3984.25	2782.57
G12	13	79183.8	15807.6	12632.2	17484.9	9727.67
H1	13	27348.6	4853.9	4064.77	5987.93	6170.44
H2	13	482579	122375	90403.2	642892	3922.08
H3	13	319259	84559.5	73392.1	512508	3033.35
H4	13	295189	74490.8	65924.1	436056	2853.85
H5	13	467816	113955	99298.7	611446	4760.02
H6	13	305708	78307.1	74203.5	474704	2842.22
H7	13	367542	94101.1	85993.6	542711	3136.2
H8	13	321521	84684.8	75238.9	485802	2803.4
H9	13	336736	87674.2	80208.9	542151	3681.97
H10	13	292407	83196	65522.4	462377	2838.9
H11	13	10348.2	1738.56	439.586	1520.03	1387.23
H12	13	20296.2	3397.76	1628.6	3594.75	3277.13
A1	14	40478.4	5151.98	2889.03	3561.77	1668.32
A2	14	345247	81902.2	65352.1	536640	3425.11
A3	14	203813	51650.1	47179.8	390743	1646.87
A4	14	229050	54530.2	53458.4	412965	2021.23
A5	14	231592	54769.5	51535.8	369642	2141.84
A6	14	193701	45791.4	44178.6	316795	1607.07
A7	14	233386	55162.4	53706.7	378536	2358.38
A8	14	244201	59119.4	54230.7	388528	2701.58
A9	14	240014	58262.8	53758.7	399133	2255.65
A10	14	216605	59907.8	47530	362833	2144.72
A11	14	0	0	0	0	0
A12	14	0	448.151	0	632.168	339.935
B1	14	0	0	0	168.004	0
B2	14	357996	92883.9	65398.1	478884	3123.71
B3	14	192845	47266.9	44269.9	334169	1560.43
B4	14	200674	47601.6	45347.1	324328	9003.94
B5	14	246819	56278.6	57230.2	384096	2761.26
B6	14	199357	47568.2	49220	329481	2327.79
B7	14	235496	54937.3	56238.2	376046	2371.86
B8	14	238293	57283.8	53906	358004	2149.51
B9	14	240490	60344.2	55387.3	382781	1837.39
B10	14	196620	53471.8	45674.9	327600	1848.86
B11	14	0	0	113.461	86.3277	130.348
B12	14	0	1.17997	0	0	0
C1	14	1855.45	662.353	646.774	683.001	435.158
C2	14	361843	84852.3	72369.1	521069	3787.43
C3	14	203492	49681	49983.9	356185	2134.17
C4	14	194124	45141.4	47141.9	319538	2105.88
C5	14	267601	61397.6	63766.3	409678	2654.77
C6	14	201241	47988.5	54165.2	350668	2129.43
C7	14	250154	58359.1	63141.8	401753	2641.5
C8	14	235148	58427.5	56932.7	366874	2093.19
C9	14	249327	64667.7	59088.9	389871	1739.86
C10	14	208365	56725.8	49283.2	340618	1339.71
C11	14	627.068	401.48	271.774	689.16	473.855
C12	14	0	0	0	314.737	15.3775
D1	14	30361.5	6383.22	5030.34	7088.6	4425.62
D2	14	382564	88040.1	75028.5	517818	3380.56
D3	14	226616	57135.9	55596.5	375790	2142.6
D4	14	225526	54791.8	54257.8	345157	2379.61
D5	14	322178	73488.3	84035.3	514914	3398.95
D6	14	217543	51298.7	63626.7	392073	2647.48
D7	14	276199	62104.1	74711.2	443473	2884.3
D8	14	249635	63016.7	64348.6	394030	1980.27
D9	14	259550	68849.6	65918.8	414587	2523.6
D10	14	242905	67351	60169	402258	1595.26
D11	14	15523.4	4891.39	4489.1	6998.67	3093.27
D12	14	8531.33	1050.18	692.214	1111.73	289.619
E1	14	3749.47	1026.33	521.368	682.116	433.285
E2	14	436226	107408	87200.5	583305	3913.47
E3	14	247309	63813.9	63511	416091	1878.21
E4	14	269676	65409.2	65452.9	397653	2901.57
E5	14	345812	86594.1	82954.9	489583	2943.46
E6	14	264727	67051.1	69794.4	409954	2780.67
E7	14	315595	80540.3	80509.7	466213	2454.43
E8	14	312840	81668.5	81263.5	483939	3194.48
E9	14	298221	78753.4	76469.8	475262	2597.26
E10	14	244700	68190.7	60762.9	399910	2034.51
E11	14	17666.5	2655.71	1927.56	2433.99	1214.73
E12	14	5069.41	1382.76	1096.29	2382.2	2542.28
F1	14	45280.8	8362.44	6015.05	7066.82	3975.98
F2	14	434258	99210.3	91889.4	625783	4057.46
F3	14	258550	65868.5	67277.9	434704	2327.91
F4	14	272609	63674.2	67878.2	416893	3730.31
F5	14	390673	88160	108821	674191	3565.85
F6	14	251193	57440.3	80577.9	494757	2601.97
F7	14	298935	67957.7	85218.8	505795	3188.31
F8	14	318809	83478.1	82370.3	491625	4169.56
F9	14	338991	90990.6	86099.8	538505	2762.01
F10	14	279286	78756.8	68129.1	455261	1687.27
F11	14	17040.2	2677.02	1696.58	2623.83	82.7431
F12	14	0	0	0	0	374.731
G1	14	16458.9	4339.29	5150.04	10379.5	13557.8
G2	14	516428	127838	99862.4	680378	4373.86
G3	14	328359	82675.4	79467	539319	2492.63
G4	14	340745	81515.7	79189	498433	2890.29
G5	14	403292	94980	103389	643942	3855.12
G6	14	281918	66570.4	82371.6	513607	3428.48
G7	14	308289	70129.3	80475.4	491219	5257.95
G8	14	304204	74698.9	80118.4	496945	3275.7
G9	14	353483	93745.3	86049.8	547448	3045.5
G10	14	261798	72945.2	63964.4	440505	1371.64
G11	14	10265.1	2669.91	2515.11	4000.03	2959.04
G12	14	79036.4	15710.3	12765.2	17373.7	9795.54
H1	14	27968.1	5352.08	3818.94	6133	6421.88
H2	14	482447	122536	90281	642756	4164.78
H3	14	319050	85125.8	73286.4	512859	2945.42
H4	14	295716	74489.9	65947.5	435953	2947.92
H5	14	467896	114253	99332.7	610623	4444.97
H6	14	306304	78532.4	74292.2	474563	3054.05
H7	14	368236	94444.1	85912.8	542856	3018.29
H8	14	321576	85079.7	75098.1	485680	2946.26
H9	14	336440	87319.9	80341.7	542229	3789.03
H10	14	292630	83552.1	65426.8	462160	2668.49
H11	14	10247.1	1361.42	383.297	1737.94	1207.84
H12	14	18741	3477.3	2080.37	4238.83	3197.41
A1	15	40445.8	4785.97	3065.57	3881.3	1838.8
A2	15	345330	81636.3	65442.9	536318	3026.96
A3	15	203726	51667.8	47123	390878	1719.45
A4	15	229581	54872.2	53510.6	412812	1866.02
A5	15	232539	55160.5	51522.7	369410	1852.64
A6	15	194415	46010.5	44279.8	316202	1435.29
A7	15	234048	54982.9	53521.8	378531	2174.98
A8	15	244376	59364.2	54461.8	388650	2479.08
A9	15	239664	58398	53615.1	399315	2593.99
A10	15	217016	59930	47642.7	362213	1807.57
A11	15	0	0	0	0	0
A12	15	0	417.244	193.051	472.715	205.896
B1	15	0	0	0	103.808	193.162
B2	15	359464	93155	65208.9	478520	3609.05
B3	15	192794	47332.5	44226.2	334459	1508.45
B4	15	200881	47634.8	45287.5	323819	8969.45
B5	15	247242	56517.2	57131.4	384916	2612.12
B6	15	199611	47599.8	49232	328863	2342.31
B7	15	235770	55128.5	56227	375411	2433.79
B8	15	238964	57351.3	53967.3	357862	2217.92
B9	15	241020	60419.9	55288.7	382737	1915.42
B10	15	197090	53434.1	45689.2	327357	1686.33
B11	15	0	0	60.308	464.138	4.10544
B12	15	0	51.9187	0	0	0
C1	15	1991.25	552.177	618.759	766.203	460.972
C2	15	361886	84955.8	72480.3	520765	3802.97
C3	15	203338	50020.8	49998	356117	2118.25
C4	15	194080	45558.4	46997.1	318896	2050.2
C5	15	268315	61591.3	63802.9	409284	2696.84
C6	15	201346	47952.8	54343.4	350539	2138.26
C7	15	251076	58277.9	63195.1	401531	2816.29
C8	15	235463	58494.5	57024.8	366947	2319.17
C9	15	249326	64700.2	59283.5	389983	1605.13
C10	15	208132	57108.7	49192.9	341334	1567.49
C11	15	646.599	519.917	322.102	702.335	500.408
C12	15	0	0	0	386.268	92.2648
D1	15	30185.7	6439.99	5109.12	7286.18	4451.5
D2	15	382721	88000	74833.5	517861	3276.9
D3	15	226976	57073.6	55677.7	376440	2066.3
D4	15	226167	54909.9	54299.4	345064	2435.87
D5	15	322616	73507.7	84152.2	515106	3425.18
D6	15	218209	51699	63721.8	391671	2563.03
D7	15	276589	62317.9	74448	443433	3404.96
D8	15	249859	63423.3	64427	394258	1985.29
D9	15	259975	69223.8	65675.8	414855	2523.6
D10	15	242924	67509	60054	401893	1635.8
D11	15	15329.8	4695.07	4567.37	6837.17	3215.58
D12	15	8204.63	1063.06	783.428	1172.94	253.046
E1	15	3827.26	668.277	594.519	686.225	433.285
E2	15	436805	107833	87265.2	583442	3815.55
E3	15	247537	63869.8	63556	416377	1956.61
E4	15	270162	65518.1	65743.3	398056	2984.6
E5	15	346424	86688.5	83058	489584	3000.42
E6	15	265500	67187.4	69882	409692	3013.12
E7	15	315564	80510.1	80571.6	466169	2652.54
E8	15	313740	81865.7	81449.1	484034	2861.81
E9	15	298411	78819.8	76578.3	474726	2454.04
E10	15	244692	68564.9	60892.4	399719	1888.23
E11	15	17644.2	2628.46	1933.03	2435.76	1482.08
E12	15	4991.57	1217.64	999.344	2241.22	2530.91
F1	15	45870.2	7895.92	6013.54	6773.54	3984.87
F2	15	435056	98875	92122.8	625980	3859.68
F3	15	259798	65650.6	67399.2	434712	2323.74
F4	15	273159	63915.7	67888.3	416815	2903.64
F5	15	390684	88556.2	108997	673304	3755.55
F6	15	251378	57446.2	80382.9	494964	2558.01
F7	15	299825	68008.9	85341.5	505924	3147.19
F8	15	319329	83615	82500.3	491945	4460.02
F9	15	339316	91141.3	86224.1	538272	3144.88
F10	15	279649	78868.5	68050.4	455513	1834.36
F11	15	16936.6	2694.23	1604.17	2439.81	86.8292
F12	15	0	0	0	0	501.074
G1	15	16275.4	4535.26	5213.56	10762.3	14004.8
G2	15	518058	127632	99848.6	680644	4474.47
G3	15	329675	82733.5	79284.2	538796	1992.59
G4	15	340907	81655.4	79053	498102	3039.34
G5	15	404198	95397.4	103320	644188	3647.88
G6	15	282042	66559.7	82386.2	513560	3608.1
G7	15	308002	70426.2	80344.4	491494	5200.03
G8	15	303980	74914.6	80214	497018	3273.75
G9	15	353222	94061.9	86114.4	547584	2917.67
G10	15	261248	73243.1	63826.5	440522	1319.26
G11	15	10639.8	2796.14	2652.19	3895.66	2690.7
G12	15	79072.1	15494.3	12736.5	17205.1	10010.2
H1	15	27786.3	5304.36	3969.17	5687.41	6301.26
H2	15	484245	122557	90313.6	643450	4168.22
H3	15	320035	85113.2	73174.6	512709	2863.44
H4	15	295741	74829.3	65947.5	435954	3143.57
H5	15	468480	114280	99047.8	610561	4756.09
H6	15	306817	78835.4	74223.1	474355	2884.23
H7	15	368635	94914.4	85939.7	543003	3326.59
H8	15	321794	85332.5	75048.1	485878	3329.39
H9	15	336838	87596.6	80225.9	541685	3475.33
H10	15	292920	83563.8	65660.2	462242	2794.44
H11	15	10333.6	1158.56	356.493	1665.75	1554.65
H12	15	19806.9	3024.53	1743.86	3866.32	3385.18
A1	16	41046.7	5035.45	2906.98	3990.34	1723.69
A2	16	345967	82047.8	65351	536962	3255.23
A3	16	204058	51987	47149.4	390335	1426.17
A4	16	229567	54993.8	53378.8	412882	1813.99
A5	16	232888	55107.8	51482.7	369537	1907.73
A6	16	194485	46060.3	44116.5	316301	1535.63
A7	16	234331	55342	53489.7	378427	2168.55
A8	16	244639	59479.6	54258	388477	2352.88
A9	16	240124	58545.5	53537.7	399077	2315.41
A10	16	217068	60090.9	47359.5	361293	1956.52
A11	16	0	0	0	0	0
A12	16	0	219.44	234.216	692.845	449.101
B1	16	0	0	0	92.8805	0
B2	16	358444	93192.4	65129.8	478509	3410.7
B3	16	193300	47263.9	44300.4	333906	1770.32
B4	16	200690	47707	45261.6	323938	9080.69
B5	16	247467	56515.5	57187.9	384630	2783.17
B6	16	199083	47602.9	49153.5	328598	2067.08
B7	16	235959	55154.7	56121.5	375670	2620.36
B8	16	238965	57361.1	53986.1	357861	2283.16
B9	16	240871	60415.8	55273	382695	1962.24
B10	16	196723	53695.1	45503.4	327067	1525.6
B11	16	0	0	128.793	29.453	0
B12	16	0	0	0	0	0
C1	16	1776.12	649.391	555.422	756.268	462.202
C2	16	362409	84903.5	72378.5	520988	3602
C3	16	204109	50030.1	50074	356156	2074.23
C4	16	194652	45538.6	47047.6	319319	2193.79
C5	16	268235	61829.2	63744.8	409464	2788.13
C6	16	201707	48231.5	54142.7	350963	1985.7
C7	16	250894	58249.1	63038.4	401019	2924.61
C8	16	235635	58562.2	57193.5	366152	2084.12
C9	16	249516	64974.9	59075	390074	1763
C10	16	208430	56958.8	49210.1	340827	1550.97
C11	16	1268.53	528.95	219.432	572.611	267.565
C12	16	0	0	0	597.561	95.5599
D1	16	30224.5	6530.06	5100.77	6940.1	4387.42
D2	16	383239	88269.7	75019.3	517590	3456.05
D3	16	227275	57367.2	55703.8	376119	2489.53
D4	16	226140	54604.6	54235.6	345509	2373.69
D5	16	323365	73696.2	84076.5	515229	3452.42
D6	16	218639	51693.6	63544	391605	2300.11
D7	16	277146	62527.2	74535.4	443392	3201.61
D8	16	250103	63328.6	64200.9	394030	1846.47
D9	16	260609	69290.5	65684.1	414677	2341.47
D10	16	243183	67594.6	60177	402101	1616.41
D11	16	15494.6	4859.98	4578.96	6950.89	3276.25
D12	16	8426.44	1039.44	659.782	1328.94	293.573
E1	16	3801.8	739.341	496.097	687.594	375.878
E2	16	437158	107973	87110	582804	4158.28
E3	16	247459	63959.5	63488.5	416147	2156.95
E4	16	270772	65759.3	65630.7	397809	2860.05
E5	16	346572	86673.3	83182.1	490101	3113.31
E6	16	264634	67269.4	69922.9	410146	2596.07
E7	16	315640	80571.5	80542.1	466231	2701.34
E8	16	313815	82446.4	81379.5	484194	2962.52
E9	16	298485	79014.5	76542.7	474645	2401.71
E10	16	244779	68465.8	60640.5	399538	1958.23
E11	16	17611.6	2584.29	1839.2	2635.79	1256.9
E12	16	5182.14	1167.31	865.932	2399.92	2452.12
F1	16	45030.2	8061.51	6046.81	6811.86	4130.21
F2	16	435458	98754.7	91876.4	626086	3603.38
F3	16	259451	65860.1	67190.7	434980	2404.05
F4	16	273043	64151.3	67939	416598	3263.51
F5	16	391677	88606.9	108844	674220	3795.21
F6	16	251359	57344.9	80393.4	495301	2613.4
F7	16	299804	68170.7	85351.9	505901	3338.45
F8	16	319234	83735.2	82519.3	491763	4263.68
F9	16	340185	91374.6	86070.9	537765	2655.24
F10	16	279970	79376	67970.6	454941	1945.21
F11	16	16946.2	2461.91	1659.2	2465.09	0
F12	16	0	0	0	0	453.803
G1	16	16428.3	4607.72	5046.23	10388.8	13765.5
G2	16	518524	128257	100143	680186	4089.22
G3	16	330022	83246.6	79681.2	538883	2151.69
G4	16	340918	81717.9	79109.2	498263	3178.53
G5	16	404126	95277.1	103369	643231	3874.31
G6	16	282396	66257.3	82357.9	513961	3134.98
G7	16	308822	70493.7	80277.9	491513	5435.42
G8	16	303708	74740.5	80088.5	496609	3068.72
G9	16	353230	93905.1	86343.7	547254	3111.44
G10	16	262162	73634.9	63775.4	440555	1150.12
G11	16	10970.3	2718.36	2502.88	3998.81	2792.24
G12	16	79018.5	15480	12750.9	17446.1	9938.66
H1	16	28002.1	4922.61	3987.95	5851.48	6506.83
H2	16	484132	122955	90116.9	642724	4369.7
H3	16	319824	85095.5	73108.5	512168	2985.82
H4	16	296004	74717.8	66027.1	435696	3123.81
H5	16	468514	114457	99034.8	610722	4577.47
H6	16	307016	78915.8	74247	474255	2740.33
H7	16	369568	95023.2	85950.3	542517	3002.82
H8	16	322762	85891.9	75062	485695	2923.07
H9	16	336323	87281.1	79935.7	541453	3665.91
H10	16	293279	83408.9	65563.4	461837	2573.41
H11	16	10288.2	1208.56	266.7	1495.97	1227.77
H12	16	19981.2	3322.3	1647.19	3741.54	3588.9
A1	17	40497.5	4894.3	2872.57	3605.69	1387.11
A2	17	346326	81895.4	65406.8	536632	3066.25
A3	17	204335	52236.9	46997.2	390714	1524.26
A4	17	230144	55288.8	53551.2	412345	2010.82
A5	17	233009	55091.5	51488.4	368903	2136.17
A6	17	194682	46215.6	44204.9	316038	1701.8
A7	17	234400	55310.4	53673.8	378345	2377.68
A8	17	245644	59530.7	54384.8	388320	2445.04
A9	17	239842	58425.6	53623.8	398810	2431.09
A10	17	217417	60213.4	47355.6	361312	1930.35
A11	17	0	0	0	0	0
A12	17	0	194.714	88.0084	855.121	364.808
B1	17	0	0	0	180.297	335.702
B2	17	358838	93554.7	65505.8	478430	3236.73
B3	17	193973	47257.8	44170.2	334134	1518.26
B4	17	201495	47830.1	45383.3	323727	9064.31
B5	17	247851	56739.2	57246.2	384201	2865.75
B6	17	199886	47914.3	49270.4	328916	1992.02
B7	17	236270	55300.9	56298.1	375524	2293.1
B8	17	239459	57537.2	53926.4	357942	2193.26
B9	17	241710	60573.8	55272.2	382292	1862.03
B10	17	197419	54080	45554.3	326852	1404.38
B11	17	0	18.7715	117.55	303.67	0
B12	17	0	31.8592	0	0	129.869
C1	17	1360.66	651.984	796.592	707.837	431.47
C2	17	362701	85286	72196.9	521160	3580.24
C3	17	204436	50270.2	50036.4	355948	2290.55
C4	17	194719	45375.4	47085.5	318907	2296.35
C5	17	268622	61822.3	63730.5	409916	2617.18
C6	17	201864	48471.3	54185.2	350726	2047.53
C7	17	251133	58413	63130.7	401265	2701.41
C8	17	235676	58606.4	57138.9	366862	2261.43
C9	17	249707	64805.8	59065.3	389849	1994.43
C10	17	208935	57079.9	49205.8	340930	1658.77
C11	17	559.221	573.113	318.076	501.668	523.896
C12	17	0	0	0	413.78	116.429
D1	17	30033.2	6631.25	5062.57	7032.14	4121.21
D2	17	384197	88086.4	74644.7	517770	3653.3
D3	17	227599	57569.9	55491.2	376490	2144.64
D4	17	226095	55052.6	54192	345152	2477.32
D5	17	323800	73824.1	84131.6	514968	3580.55
D6	17	218748	51788.7	63486.9	392042	2500.66
D7	17	276830	62485.5	74491.7	443432	3019.87
D8	17	249781	63669.5	64168.4	394206	1968.56
D9	17	261046	69160.3	65798.1	414531	2472.17
D10	17	243498	67826.6	60067.2	401799	1822.65
D11	17	14978.4	4656.79	4595.39	6915.53	3046.09
D12	17	8306.25	1025.48	662.822	1143.32	175.946
E1	17	3866.86	856.871	525.358	739.643	657.445
E2	17	437761	107772	87006.2	583194	4091.1
E3	17	247941	64070.2	63524.9	415927	2056.78
E4	17	270869	66015.3	65574.3	397339	2881.37
E5	17	346718	87048	83164.1	489569	3255.71
E6	17	265327	67194.8	69769.1	409477	2579.47
E7	17	316007	80832.2	80345.5	466303	2707.19
E8	17	314100	82416	81357.3	483637	2524.05
E9	17	298487	79008.1	76544.6	474981	2414.56
E10	17	245210	68735.7	60818.8	399460	1888.23
E11	17	17560.3	2496.9	1958.53	2543.74	1150.14
E12	17	5484.55	1324.48	1000.17	2312.11	2593.45
F1	17	45195.7	7956.42	6078.56	6826.6	3897.38
F2	17	435359	98960	91846.9	625955	3682.97
F3	17	259530	65888.5	67343.9	434331	2484.35
F4	17	273625	63965.9	67617.7	416566	3393.06
F5	17	391909	88622.1	108729	673698	3784.49
F6	17	250874	57480	80479.1	494657	2262.55
F7	17	299786	68151.5	85266	506404	3573.7
F8	17	319811	84016.8	82321.3	491442	4279.88
F9	17	340693	91675.9	85953.1	538152	2649.85
F10	17	279741	79282.4	68164.1	455066	1946.28
F11	17	17142.7	2567.31	1705.93	2622.82	0
F12	17	0	0	0	0	501.074
G1	17	16071.5	4612.66	5084.97	10475.6	14028.9
G2	17	518672	128563	99934.7	680305	3905.19
G3	17	330520	83143	79262.8	538660	2182
G4	17	341024	81715	79065.8	498288	3139.04
G5	17	404276	95639	103119	643286	4014.39
G6	17	282271	66526.8	82362.5	513589	3383.11
G7	17	308349	70495.5	80468	491322	5311.19
G8	17	303470	74676.2	80243.9	496572	3176.58
G9	17	353909	93946.6	86200.2	547085	2912.6
G10	17	262571	73534.5	63742.9	440108	1230.87
G11	17	10521.4	2616.36	2439.23	4070.41	2823.66
G12	17	78833.8	15603	12840.9	17509.8	10127.4
H1	17	27698.3	4842.45	3812.11	6027.65	5895.22
H2	17	484706	123345	90194.9	643471	3952.99
H3	17	320533	85491.2	73145.7	512335	2643.63
H4	17	296375	74759.4	66109.6	436117	3138.86
H5	17	468784	114389	99071.8	609443	4498.95
H6	17	307156	79196.8	74228.4	473849	2795.75
H7	17	369615	95052.1	86060.9	542449	3134.26
H8	17	322156	85584.3	74995.3	485903	2826.6
H9	17	335739	87289.7	80276.9	540703	3480.68
H10	17	292706	84126.4	65431.8	461739	2447.45
H11	17	10402.5	1441.42	454.328	1564.15	1032.45
H12	17	19802.4	3409.99	1676.94	4115.88	3884.72
A1	18	41330	5055.14	2990.76	3596.6	1408.97
A2	18	346088	82231.3	65367.4	535997	3215.95
A3	18	204364	52207.8	47212.3	390886	1592.92
A4	18	230054	55413.1	53521.2	412031	1925.85
A5	18	233103	55206.7	51536.6	369069	1962
A6	18	194331	45963.9	44153.2	315730	1274.74
A7	18	234177	55552.5	53542.7	378185	2271.51
A8	18	245523	59790.3	54330.1	388656	2317.18
A9	18	240398	58073.4	53634.3	398717	2373.25
A10	18	217597	60063.6	47562.9	361125	1861.91
A11	18	0	0	0	0	0
A12	18	0	52.5419	11.3559	723.889	543.067
B1	18	0	0	0	19.1225	0
B2	18	358918	93407.4	65469.1	478119	3500.46
B3	18	193572	47636.1	44298.3	333808	1797.78
B4	18	200917	47753.7	45234.9	323357	9097.08
B5	18	248453	56745	57253.8	384597	2880.91
B6	18	200120	47849.4	49133.5	328770	2025.92
B7	18	236445	55509.5	56218.8	375233	2410.86
B8	18	239982	57408.2	53953.1	357572	2178.15
B9	18	242287	60677.2	55241	382262	1946.63
B10	18	197871	54064.7	45484.7	326981	1708.78
B11	18	0	94.9003	132.882	66.0153	59.5289
B12	18	0	0	0	0	16.7934
C1	18	1909.23	716.793	534.715	569.995	384.758
C2	18	363162	85262.1	72353.3	521139	3311.93
C3	18	204424	50344.7	50089	356013	2146.34
C4	18	195158	45643.3	47052.5	318610	2109.79
C5	18	268816	61915.7	63815.4	409068	2560.79
C6	18	202166	48299	54227	350648	2496.38
C7	18	251142	58428.9	63183.2	401164	2657.09
C8	18	235389	58584.3	57063.1	366703	2300.2
C9	18	249799	65112.2	59185	389481	1784.49
C10	18	209168	57683.2	49218.7	340913	1747.45
C11	18	993.029	432.595	357.332	670.917	660.742
C12	18	0	0	0	398.374	30.7549
D1	18	30189.6	6420.24	5113.9	7142.59	4458.9
D2	18	383762	88327.3	74702.6	517081	3276.9
D3	18	227889	57690.5	55584.5	376369	2307.42
D4	18	226576	55346.9	54274.3	344930	2519.77
D5	18	323626	73881.1	84132.5	514840	3691.53
D6	18	218971	51979	63476.5	391592	1965.22
D7	18	277389	62371.6	74493.6	442990	3045.41
D8	18	250045	63737.6	64373.6	394450	1929.26
D9	18	261016	69775.9	65729.4	414150	2542.99
D10	18	244012	67961.7	60135.4	402033	1603.19
D11	18	15489.7	4656.79	4407.94	6694.79	3149.13
D12	18	8462.5	922.394	707.416	1046.56	246.127
E1	18	3724.01	743.441	502.748	458.853	501.627
E2	18	437688	108006	87055.4	583194	4244.81
E3	18	248603	64470	63495	415316	2009.96
E4	18	270629	65981.5	65448.4	397121	2959.92
E5	18	346576	87015.5	83045	490036	3062.46
E6	18	265542	67319.2	69831.4	409306	3195.77
E7	18	316114	80875.7	80380.9	465858	2880.9
E8	18	314492	82686.7	81449.1	484053	2724.46
E9	18	297842	78939	76539.1	474187	2450.37
E10	18	245194	68740.1	60817	399918	2204.13
E11	18	17792.3	2504.42	1933.94	2610.12	1282.91
E12	18	4853.79	1256.49	1104.58	2359.64	2371.71
F1	18	45009.7	8295.57	6081.59	6962.18	4079.79
F2	18	435104	98997.7	91988.4	625098	3679.45
F3	18	260348	66180.1	67272.6	434752	2192.32
F4	18	273370	64199.6	67875.1	417032	2766.89
F5	18	392192	88531.9	108875	672645	3685.89
F6	18	250853	57283.3	80412.6	494618	2487.66
F7	18	299780	68365.4	85128.2	505398	3011.4
F8	18	319479	83932.7	82459.3	491071	4029.9
F9	18	340375	91878.6	86085.9	538276	2613.18
F10	18	280456	79647.3	68186.5	455333	1791.73
F11	18	17037	2785.65	1670.62	2511.6	164.465
F12	18	0	0	0	0	446.068
G1	18	16700.2	4783.92	4933.13	10438.4	13712.8
G2	18	519553	128482	99896	680053	3971.44
G3	18	329803	83311.1	79303.1	538889	2168.11
G4	18	341478	81924.1	79041.2	498183	3236.77
G5	18	404176	95734.9	103116	643913	3797.55
G6	18	282184	66470.8	82415.4	513602	3203.5
G7	18	308683	70767.2	80489.2	491568	5567.13
G8	18	303312	74575	80109.8	496482	3260.15
G9	18	354000	93913.2	86190.1	546999	2860.86
G10	18	263186	73794.2	63782	440402	1185.04
G11	18	10620.3	2801.24	2677.89	3776.72	2650.81
G12	18	79310.5	15703.2	12795.2	17317.5	10139.8
H1	18	28263.9	4914.98	3796.75	6032.83	6364.12
H2	18	484817	123000	90143.6	641666	3904.91
H3	18	320600	85907.1	73178.2	512263	2604.42
H4	18	296110	74886.1	66083.3	435824	2930.04
H5	18	469525	114626	99339.7	610628	4720.76
H6	18	307963	79092.5	74193.8	473716	2671.51
H7	18	370767	95278.6	85924.3	542027	2934.2
H8	18	322810	86005.2	75150	485295	3077.06
H9	18	335421	86622.1	80150.4	541066	3623.08
H10	18	293576	83735.4	65462.8	461390	2717.88
H11	18	10166.5	1727.13	340.411	1577.52	1202.53
H12	18	19065	3161.18	1784.76	4293.88	3633.18
A1	19	40773.1	4848.34	3128.41	3434.57	1894.16
A2	19	347082	82414.7	65470.2	535820	3094.91
A3	19	205044	52396.5	47110.8	390567	1476.2
A4	19	230436	55832.4	53496.4	411871	2150.43
A5	19	233415	55633.4	51545.6	369269	1831.58
A6	19	194732	46112.3	44156.3	315801	1464.19
A7	19	234742	55593.6	53527.5	378340	2131.55
A8	19	246295	59998.1	54340.9	388105	2504.81
A9	19	240612	58400.8	53753.9	398442	2625.81
A10	19	217419	60417.7	47499.1	360788	2016.91
A11	19	0	0	0	0	0
A12	19	0	281.254	36.9067	756.344	287.425
B1	19	0	0	0	0	345.027
B2	19	359076	94161.2	65387.7	478047	3297.68
B3	19	193966	47606.9	44162.1	333553	1545.72
B4	19	201330	48154.6	45318.6	323950	9195.39
B5	19	248029	56747.5	57117	384387	2674.47
B6	19	200301	48023.9	49153.5	329154	2071.12
B7	19	236649	55429.5	56217.3	375593	2301.52
B8	19	240921	57831.5	54006.5	357713	2467.72
B9	19	243009	60866.1	55366.8	381977	1921.17
B10	19	198602	54176	45566	326604	1697.11
B11	19	0	0	26.5764	0	186.798
B12	19	0	0	0	33.4116	0
C1	19	1741.17	760.864	682.097	550.126	97.1115
C2	19	363262	85463.7	72265.1	520717	3667.26
C3	19	204773	50222.7	50083.4	355682	2276.51
C4	19	195517	45791.4	46965	318627	2179.14
C5	19	269295	61805.9	63855.7	409354	2465.01
C6	19	202219	48670.1	54169.2	350536	2024.24
C7	19	251591	58645.9	63089.3	401350	2515.13
C8	19	236000	58745	57055.8	366240	2354.63
C9	19	250227	65305.9	59102.7	389432	2015.1
C10	19	209517	57571.4	49205.8	340445	1825.69
C11	19	655.851	391.443	233.524	846.247	825.162
C12	19	0	11.5758	0	255.311	170.25
D1	19	30559.3	6340.04	5138.96	6978.14	4998.7
D2	19	384320	88145.1	74809.2	517277	3353.39
D3	19	227853	57846.7	55826.1	375827	2558.71
D4	19	226923	55088	54024.6	344811	2304.6
D5	19	324103	74215	84013.7	514789	3480.67
D6	19	218992	51988	63739	391103	2426.77
D7	19	277505	62688.2	74501.4	443022	3070.95
D8	19	250425	63711.7	64364.4	394116	2132.47
D9	19	261301	69552.5	65653.1	414074	2316.18
D10	19	243911	68144.3	60170.8	401593	1674.58
D11	19	15018.1	4549.79	4621.48	6862.98	3102.91
D12	19	8564.11	1123.19	636.472	1239.09	631.626
E1	19	3851.3	840.471	595.849	741.013	426.451
E2	19	438105	108021	87155.8	582383	4070.6
E3	19	248861	64621.9	63382.6	415071	1992.54
E4	19	270796	65904.2	65592	397388	2693.99
E5	19	346812	86836.3	83247.2	489949	3336.06
E6	19	265632	67807.5	69622.1	409199	2708.39
E7	19	315992	80836	80208.8	465750	2789.17
E8	19	314570	82419.9	81301.8	484015	2671.56
E9	19	298014	78846.2	76440.6	474350	2807.5
E10	19	245181	68459.6	60927	399293	2034.51
E11	19	17760.7	2553.28	2016.83	2515.41	1241.64
E12	19	5006.78	1109.03	933.881	2388.64	2526.85
F1	19	45118.4	7986.68	5954.57	6969.55	3605.22
F2	19	435470	98900.5	91825.7	625418	3733.29
F3	19	259681	66303.3	67357.7	433908	2279.93
F4	19	274337	64062.6	67819.4	416281	3048.61
F5	19	391624	88800.4	108868	672915	3690.17
F6	19	250615	57344.1	80364.5	495117	2703.98
F7	19	300300	68057.3	85138.6	506074	3050.6
F8	19	320123	84185	82454.3	492002	4389.17
F9	19	340862	92002.7	85997	537562	2975.55
F10	19	280447	79638.8	68178	454893	1751.22
F11	19	17014.5	2511.39	1705.93	2452.95	0
F12	19	0	0	0	0	191.663
G1	19	16934.7	4686.76	5072.57	10498.8	13584.9
G2	19	521072	128516	99829.9	680060	4175.11
G3	19	329716	83485.5	79309.4	538888	2280.49
G4	19	341242	81812.7	79025.4	498374	3257.5
G5	19	404288	95707.7	103175	642570	3729.43
G6	19	282167	66692.2	82350.6	513645	3269.23
G7	19	308730	70754.6	80234.6	491680	5389.65
G8	19	302717	74612.8	80141.6	496375	3101.76
G9	19	355046	93938.5	86266.9	547025	3118.54
G10	19	263231	73792	63730.9	439855	1204.68
G11	19	10669.7	2630.39	2359.68	3866.53	2809.16
G12	19	79027.4	15776.1	12572.1	17325	10234.8
H1	19	28271.9	4909.25	3610.66	5953.38	6574.78
H2	19	485296	122980	90269.4	641241	4137.31
H3	19	320648	85740.2	73098.9	512782	3314.94
H4	19	296474	74972.1	66013.1	435913	2842.57
H5	19	470563	115042	98887.9	608933	4681.5
H6	19	309301	79496.2	74137.9	473772	2789.49
H7	19	371813	95435.6	85877.2	541297	3140.06
H8	19	323027	86052.6	75062.9	485086	3026.04
H9	19	335033	86624.2	79929.3	540530	3952.84
H10	19	293767	84059.3	65544.8	462056	2935.21
H11	19	10550.5	1477.13	548.142	1324.85	1286.24
H12	19	20144.3	3187.69	1862.85	3989.27	3898.9
A1	20	40786.5	4795.82	3119.43	3953.99	1672.69
A2	20	347379	82477.8	65278.9	535636	3104.47
A3	20	205099	52388.2	47213.3	391075	1807.73
A4	20	230390	55600.5	53485.8	412504	1858.21
A5	20	234151	55591.2	51609.3	368990	1988.73
A6	20	194669	46312	44163.5	315935	1458.57
A7	20	234604	55329.4	53602.2	378150	2136.37
A8	20	247460	60265.9	54343.3	387996	2625.2
A9	20	241114	58474.1	53507	399171	2499.53
A10	20	218466	60677.8	47347.6	361410	1859.9
A11	20	0	0	0	0	0
A12	20	0	312.161	103.623	560.203	584.523
B1	20	0	0	0	45.0744	0
B2	20	359565	93955.5	65337.3	477475	3490.48
B3	20	194303	48043.7	44242.4	333940	1599.67
B4	20	201939	48220.9	45185.7	323484	8707.29
B5	20	248821	56837.5	57133.1	384486	2582.63
B6	20	200315	48117.4	49206.3	328648	2180.89
B7	20	237138	55531.3	56183.6	375552	2210.53
B8	20	242077	57830	53947.6	357175	2418.4
B9	20	244822	61216.1	55332.2	382143	1885.85
B10	20	199762	54437	45583.8	326508	1729.43
B11	20	0	115.757	37.8203	184.843	0
B12	20	0	0	0	0	0
C1	20	1648.39	653.28	637.03	905.287	174.555
C2	20	364019	85601	72460.4	520748	3702.49
C3	20	204963	50528	49970.8	355799	2265.27
C4	20	194996	45820.7	46957.3	318446	2283.65
C5	20	269705	62333.5	63945.1	409583	2781.87
C6	20	202476	48675.5	54070.5	350151	2296.44
C7	20	251650	58345.4	63135.4	401392	2608.68
C8	20	235754	58510.2	57094.9	366608	1990.1
C9	20	250430	65233.7	59197.2	389625	1888.64
C10	20	209554	57762.8	49184.2	340304	1635.3
C11	20	972.469	316.165	364.378	489.506	645.424
C12	20	0	0	0	333.445	4.39356
D1	20	30086.2	6678.14	5032.72	6737.6	4486.01
D2	20	384254	88085.4	74696.5	517232	3349.37
D3	20	228675	58002.9	55479.2	375947	2403.05
D4	20	226981	55336	54095.2	344820	2247.36
D5	20	324689	74400.8	84249.5	514635	3520.02
D6	20	219129	52071.4	63614.4	390706	2204.15
D7	20	277590	62601.2	74379	442851	3171.15
D8	20	250656	63750.5	64437	393613	2048.01
D9	20	261604	69532.8	65836.7	414472	2568.29
D10	20	244542	68175.2	60080.5	402126	1717.77
D11	20	15291.1	4753.97	4468.81	7015.87	3087.5
D12	20	8196.99	1137.15	798.63	1358.56	179.9
E1	20	3933.34	843.205	646.39	714.989	0
E2	20	438657	108174	87127.9	583222	3829.21
E3	20	248521	64629.3	63514.2	415273	2052.43
E4	20	271104	66072.4	65502.6	396642	3095.68
E5	20	346946	87109	82929.9	490001	3257.74
E6	20	265544	67692.3	69769.1	409137	2651.74
E7	20	316537	80956	80549	465881	2571.54
E8	20	314802	82810.3	81396.6	483561	3044.93
E9	20	299044	79164.6	76499.9	473923	2696.42
E10	20	245733	68607.4	60792.2	399835	1816.43
E11	20	17588.3	2868.1	1999.52	2356.98	1404.92
E12	20	5052.41	925.371	1000.17	2454.7	2811.94
F1	20	45343.8	8024.89	5927.35	6950.39	3624.5
F2	20	435274	98797.3	91769.1	625169	3912.35
F3	20	260650	66301.2	67163	434660	2598.04
F4	20	274018	64131.5	67429.2	415680	3378.67
F5	20	392278	88894.6	108947	673897	3668.74
F6	20	250361	56955.8	80254.4	494459	2625.72
F7	20	300683	68382.8	85152.7	505598	3491.46
F8	20	320161	84188.9	82530.3	491187	4263.68
F9	20	341602	91976.2	86200.5	537787	3002.52
F10	20	280981	79878.1	68208.8	455346	1933.49
F11	20	17068	2601.73	1699.7	2352.85	0
F12	20	0	0	0	0	487.322
G1	20	16756.3	4535.26	5230.61	10422.9	13931
G2	20	521969	128763	99934.7	680510	4311.29
G3	20	331314	83579	79584.1	539365	2104.97
G4	20	341424	81503	78869.8	498109	3296.98
G5	20	404695	95664.4	102969	642270	3744.78
G6	20	282381	66916.3	82396.2	513506	3563.66
G7	20	309063	70551.3	80420	491764	5833.34
G8	20	303228	74547.6	79987.2	496385	3219.34
G9	20	354977	94188.4	86175	547246	3214.92
G10	20	263548	74034.2	63861.2	440354	1305.08
G11	20	10652.8	2714.54	2619.15	3906.58	2757.18
G12	20	78664	15640.2	12895.7	17260.1	10012.7
H1	20	27336.6	5145.94	3921.37	5777.22	6260.48
H2	20	486546	122812	90190.2	641714	4108.69
H3	20	320627	85804.7	73195	512033	2612.74
H4	20	296823	74871.9	66170.4	436025	3027.87
H5	20	472575	115387	98837.9	608568	4330.14
H6	20	311067	79866.4	74101.5	474442	2704.58
H7	20	374435	95973.3	85926.3	542051	3392.31
H8	20	322999	85801.7	74996.2	485435	3115.1
H9	20	335155	86490.7	79784.8	540271	3630.57
H10	20	293971	84285.1	65599.4	461583	2538.83
H11	20	10856.8	1487.13	612.471	1588.21	1371.28
H12	20	18968.9	3126.51	1708.54	4139.74	3425.93
A1	21	40662.1	5125.72	3089.51	3863.13	1631.9
A2	21	348165	82650.9	65232.9	535307	3075.8
A3	21	205275	52604.8	47285.4	390565	1741.03
A4	21	230911	55668.9	53392.1	411976	2096.67
A5	21	234060	55824	51512.9	368429	2134.55
A6	21	195005	46097.5	44223.3	315533	1562.92
A7	21	234547	55497.9	53560.4	377857	2121.9
A8	21	248900	60648.4	54355.8	388090	2437.56
A9	21	242450	58656	53385.5	399021	2097.56
A10	21	220044	60616.1	47362.5	360243	1839.77
A11	21	0	0	0	0	0
A12	21	0	420.335	151.885	867.82	632.887
B1	21	0	0	0	13.6589	0
B2	21	360057	94049	65344.2	477481	3522.62
B3	21	194825	47854	44234.3	333965	1521.2
B4	21	202320	48458.8	45127.9	323254	9002.22
B5	21	248623	57082.6	57089.1	384170	2408.21
B6	21	200715	48223.2	49157.5	328618	2212.37
B7	21	237158	55708.7	56322.7	375154	2417.74
B8	21	244689	58170.7	53935.1	357878	2426.35
B9	21	247319	61607.7	55210.6	382453	1556.48
B10	21	202147	54756.4	45347.1	326320	1606.41
B11	21	0	0	88.9288	147.265	0
B12	21	0	0	0	0	181.369
C1	21	2116.29	719.385	629.721	819.601	287.647
C2	21	364328	85651.1	72314.5	520824	3758.43
C3	21	204982	50600.6	50033.6	355628	2082.66
C4	21	195676	45938.6	46897	318458	2004.3
C5	21	269528	62486.6	63899.5	409463	2468.59
C6	21	202705	48765.6	54003.8	350125	2202.5
C7	21	251310	58576.1	63129.9	401432	2687.46
C8	21	236374	58717.5	57009.3	366642	2162.47
C9	21	251133	65475	59010.7	389449	1640.68
C10	21	210285	58053.4	49225.5	340733	1661.38
C11	21	804.908	341.258	395.582	462.142	497.344
C12	21	0	0	0	370.862	0
D1	21	30281.4	6546.1	5158.06	7049.32	4562.42
D2	21	385470	88170.9	74783.8	517513	3603.99
D3	21	228879	58171	55606.5	375888	2315.56
D4	21	227608	55491.4	54096.2	344496	2648.07
D5	21	324799	74253.6	84028.4	514798	3454.44
D6	21	219765	51841.7	63359.5	391561	2319.3
D7	21	278273	62841.9	74444.1	442718	3090.6
D8	21	250577	63900.4	64346.1	394191	2185.99
D9	21	261921	69719.8	65740.3	414478	2397.12
D10	21	244466	68251.1	60022.1	401824	1787.39
D11	21	15196.8	4704.89	4633.07	7007.27	3120.24
D12	21	8449.39	963.199	795.59	1135.42	124.546
E1	21	4194.99	1104.23	524.028	793.062	0
E2	21	438586	107888	87093.3	582466	4291.5
E3	21	248244	64657.7	63338.7	414771	2154.77
E4	21	271380	66228	65619.6	396621	3147.29
E5	21	347381	86864	82899.9	489671	3449.97
E6	21	265772	67613.1	69792.4	408721	2747.46
E7	21	316708	81017.4	80207.8	465556	2647.66
E8	21	314936	82868.2	81176.8	483937	2893.34
E9	21	298554	78716.1	76426	473719	2363.15
E10	21	245825	68916.2	60754	399643	2178.11
E11	21	17554.7	2613.43	1954.89	2592.42	1252.41
E12	21	5171.41	1256.49	1032.49	2455.51	2476.49
F1	21	45622.8	7954.83	5885.02	7102.19	3993.77
F2	21	435840	98719.5	91879.9	624966	4106.62
F3	21	261004	66275.9	67045.9	434430	2478.1
F4	21	274075	64121.7	67652.2	415616	3103.11
F5	21	392318	89186.5	108819	673845	3868.09
F6	21	250480	57033.4	80282.3	494302	2740.91
F7	21	299963	68312.4	85192.4	505811	3314.54
F8	21	320416	84321.8	82440.3	490796	4422.57
F9	21	341875	91944.3	86084.8	537914	2646.61
F10	21	281131	79669.6	68149.3	455364	1717.12
F11	21	16699.4	2537.2	1643.63	2597.54	77.6355
F12	21	0	0	0	0	458.1
G1	21	16537.1	4630.77	5202.72	10308.2	13485.5
[truncated: 10,871 more rows]

## Sheet: Multicomponent Data
Block Type	96alum
Chemistry	SYBR_GREEN
Experiment File Name	D:\HAIFENG\CBF78Untitled.eds
Experiment Run End Time	2013-01-10 10:21:38 AM CST
Instrument Type	sds7500
Passive Reference	ROX
Well	Cycle	SYBR	ROX
A1	1
A2	1	338801	542693
A3	1	199481	393488
A4	1	226473	417265
A5	1	229731	373273
A6	1	191036	321590
A7	1	231415	382805
A8	1	243986	395121
A9	1	242631	408188
A10	1	220339	370682
A11	1
A12	1
B1	1
B2	1	354293	479095
B3	1	188496	333889
B4	1	197192	325154
B5	1	240875	383077
B6	1	195138	332102
B7	1	230545	377932
B8	1	236400	361338
B9	1	239004	386435
B10	1	197715	335235
B11	1
B12	1
C1	1
C2	1	352288	517312
C3	1	198707	356019
C4	1	190117	321458
C5	1	260522	408307
C6	1	197038	354385
C7	1	245664	400938
C8	1	232182	365738
C9	1	245367	389584
C10	1	205356	342439
C11	1
C12	1
D1	1
D2	1	376985	516937
D3	1	222203	376710
D4	1	221529	346892
D5	1	313759	513293
D6	1	213093	397564
D7	1	270283	444942
D8	1	244325	391657
D9	1	254371	412463
D10	1	237788	400070
D11	1
D12	1
E1	1
E2	1	425809	577302
E3	1	242352	417100
E4	1	263476	399255
E5	1	340463	487818
E6	1	261732	414265
E7	1	308740	466598
E8	1	307561	483305
E9	1	296151	475061
E10	1	239284	398954
E11	1
E12	1
F1	1
F2	1	432336	621719
F3	1	251296	432585
F4	1	268133	417559
F5	1	383280	672374
F6	1	249313	493579
F7	1	294640	503741
F8	1	313764	491234
F9	1	332818	537148
F10	1	272218	452900
F11	1
F12	1
G1	1
G2	1	498220	674733
G3	1	320502	535194
G4	1	333444	495158
G5	1	397157	645054
G6	1	277991	513202
G7	1	302006	488146
G8	1	305972	498805
G9	1	349774	550592
G10	1	260697	444183
G11	1
G12	1
H1	1
H2	1	479424	656436
H3	1	315976	520011
H4	1	292473	440880
H5	1	470947	619337
H6	1	306103	483405
H7	1	368150	549432
H8	1	321890	494667
H9	1	342553	552946
H10	1	292312	470333
H11	1
H12	1
A1	2
A2	2	339767	541392
A3	2	200205	392658
A4	2	226342	415592
A5	2	229607	372088
A6	2	191613	319819
A7	2	231704	382627
A8	2	242294	391888
A9	2	241333	404168
A10	2	218986	368763
A11	2
A12	2
B1	2
B2	2	355476	480442
B3	2	188793	334229
B4	2	198003	325365
B5	2	242345	383784
B6	2	196337	331348
B7	2	231866	377739
B8	2	236775	360350
B9	2	238587	385271
B10	2	197062	331726
B11	2
B12	2
C1	2
C2	2	354586	519283
C3	2	199956	356274
C4	2	190759	320743
C5	2	262635	408688
C6	2	198669	353802
C7	2	248112	401852
C8	2	233270	366820
C9	2	246668	390259
C10	2	206070	342206
C11	2
C12	2
D1	2
D2	2	379069	518101
D3	2	222548	376602
D4	2	222651	346505
D5	2	316014	514192
D6	2	214762	395832
D7	2	272594	444572
D8	2	245865	393157
D9	2	255918	414402
D10	2	239032	401081
D11	2
D12	2
E1	2
E2	2	429756	579936
E3	2	243633	418349
E4	2	265888	399486
E5	2	342180	488847
E6	2	262757	413657
E7	2	311500	467333
E8	2	309607	484266
E9	2	296932	476000
E10	2	239785	399050
E11	2
E12	2
F1	2
F2	2	433899	624313
F3	2	253874	433944
F4	2	270203	418104
F5	2	386577	673865
F6	2	251788	494591
F7	2	296300	504226
F8	2	315260	492266
F9	2	334288	538828
F10	2	273605	453423
F11	2
F12	2
G1	2
G2	2	502706	676685
G3	2	322398	536853
G4	2	336054	496849
G5	2	399451	646504
G6	2	280060	514308
G7	2	303901	489354
G8	2	305937	499852
G9	2	351516	550449
G10	2	260308	442812
G11	2
G12	2
H1	2
H2	2	480959	655452
H3	2	317028	519038
H4	2	293203	439622
H5	2	470590	620570
H6	2	306067	482255
H7	2	368180	548371
H8	2	322094	492967
H9	2	342393	550250
H10	2	292259	469177
H11	2
H12	2
A1	3
A2	3	339652	539756
A3	3	200281	392076
A4	3	226399	413914
A5	3	229018	370487
A6	3	191711	318974
A7	3	231368	380766
A8	3	242134	390427
A9	3	240175	402275
A10	3	218167	368381
A11	3
A12	3
B1	3
B2	3	356964	480009
B3	3	189568	334187
B4	3	198685	325143
B5	3	243482	383420
B6	3	196875	330621
B7	3	232871	377069
B8	3	236601	359386
B9	3	237751	383506
B10	3	196454	330523
B11	3
B12	3
C1	3
C2	3	356247	520254
C3	3	200616	356580
C4	3	191922	320557
C5	3	263843	408970
C6	3	199075	353520
C7	3	249559	402102
C8	3	233636	367083
C9	3	246734	390472
C10	3	206371	342205
C11	3
C12	3
D1	3
D2	3	379291	518525
D3	3	223389	376663
D4	3	223372	346370
D5	3	317920	514819
D6	3	215185	395113
D7	3	273312	444621
D8	3	246622	393516
D9	3	256701	414759
D10	3	239267	401512
D11	3
D12	3
E1	3
E2	3	431255	581771
E3	3	243997	418043
E4	3	267124	399908
E5	3	343619	489769
E6	3	262842	413286
E7	3	313043	467989
E8	3	309860	484543
E9	3	297453	476687
E10	3	240431	399474
E11	3
E12	3
F1	3
F2	3	435036	625038
F3	3	254797	434238
F4	3	271004	418680
F5	3	387600	674034
F6	3	252520	495787
F7	3	297737	505446
F8	3	315917	492655
F9	3	335638	538611
F10	3	274997	453801
F11	3
F12	3
G1	3
G2	3	505447	678401
G3	3	323884	538110
G4	3	337815	497483
G5	3	400942	645772
G6	3	280722	514160
G7	3	304988	490298
G8	3	305378	498479
G9	3	352052	550173
G10	3	260059	440948
G11	3
G12	3
H1	3
H2	3	480709	651994
H3	3	316669	516157
H4	3	293986	438328
H5	3	469350	617521
H6	3	305386	479799
H7	3	368069	547033
H8	3	321304	491058
H9	3	341860	547637
H10	3	292106	467403
H11	3
H12	3
A1	4
A2	4	340534	539880
A3	4	201488	391680
A4	4	226369	414214
A5	4	229834	370638
A6	4	192613	318477
A7	4	232183	380616
A8	4	242399	390329
A9	4	240575	401509
A10	4	218713	367646
A11	4
A12	4
B1	4
B2	4	357023	480887
B3	4	190485	334249
B4	4	199464	325481
B5	4	244341	383843
B6	4	197590	330836
B7	4	234025	376793
B8	4	237563	359218
B9	4	238812	383868
B10	4	196886	330077
B11	4
B12	4
C1	4
C2	4	358144	520789
C3	4	201751	356912
C4	4	192485	320788
C5	4	265327	409843
C6	4	200230	353663
C7	4	249871	402510
C8	4	234372	367648
C9	4	247533	390947
C10	4	206953	341832
C11	4
C12	4
D1	4
D2	4	381032	519300
D3	4	224352	376681
D4	4	224462	347057
D5	4	319458	515500
D6	4	216220	394915
D7	4	274117	445238
D8	4	248095	394661
D9	4	258045	415624
D10	4	240279	401876
D11	4
D12	4
E1	4
E2	4	433367	583037
E3	4	245731	418757
E4	4	268147	400085
E5	4	344788	490749
E6	4	264046	413591
E7	4	314606	468539
E8	4	311453	485308
E9	4	298289	477426
E10	4	241372	399764
E11	4
E12	4
F1	4
F2	4	436127	626249
F3	4	256305	435106
F4	4	271933	419736
F5	4	388782	673944
F6	4	253653	496318
F7	4	298779	506163
F8	4	316515	492444
F9	4	337422	539387
F10	4	276169	454366
F11	4
F12	4
G1	4
G2	4	509300	679566
G3	4	325556	538028
G4	4	339556	498436
G5	4	401904	647710
G6	4	281568	514388
G7	4	306811	491169
G8	4	305955	498888
G9	4	352867	549907
G10	4	259917	441012
G11	4
G12	4
H1	4
H2	4	482297	651205
H3	4	318260	516091
H4	4	295008	437742
H5	4	470266	616808
H6	4	306139	479069
H7	4	368845	546590
H8	4	321943	489979
H9	4	341670	547017
H10	4	292906	466671
H11	4
H12	4
A1	5
A2	5	341164	539599
A3	5	201898	391600
A4	5	227100	413758
A5	5	230727	370462
A6	5	193230	318241
A7	5	232764	380519
A8	5	243129	389804
A9	5	241130	401666
A10	5	218855	366779
A11	5
A12	5
B1	5
B2	5	358953	481185
B3	5	191447	334532
B4	5	200149	325162
B5	5	245440	384573
B6	5	198840	330706
B7	5	234785	377142
B8	5	238645	359768
B9	5	239752	383957
B10	5	197485	330371
B11	5
B12	5
C1	5
C2	5	359299	521776
C3	5	202214	357225
C4	5	193306	320944
C5	5	266102	410313
C6	5	200898	353739
C7	5	251127	403138
C8	5	235051	368193
C9	5	248373	390681
C10	5	207524	342005
C11	5
C12	5
D1	5
D2	5	381948	519573
D3	5	225399	376750
D4	5	224777	346906
D5	5	320641	516063
D6	5	216750	394763
D7	5	275339	445932
D8	5	249067	394903
D9	5	258765	415959
D10	5	241433	402295
D11	5
D12	5
E1	5
E2	5	434855	583526
E3	5	246505	418933
E4	5	268825	400437
E5	5	346194	491227
E6	5	265170	413609
E7	5	315442	468915
E8	5	312319	485823
E9	5	298606	477514
E10	5	242331	400373
E11	5
E12	5
F1	5
F2	5	437068	627799
F3	5	257865	435798
F4	5	273120	419573
F5	5	390016	674707
F6	5	253683	496532
F7	5	299721	507255
F8	5	317570	493496
F9	5	337788	540355
F10	5	277658	455674
F11	5
F12	5
G1	5
G2	5	510959	680836
G3	5	326982	539101
G4	5	340736	499378
G5	5	403541	646783
G6	5	282733	514988
G7	5	306767	491618
G8	5	306577	498730
G9	5	353644	550079
G10	5	261311	441415
G11	5
G12	5
H1	5
H2	5	483067	649678
H3	5	318986	515486
H4	5	295880	437914
H5	5	470617	615189
H6	5	306717	478315
H7	5	369232	546186
H8	5	322830	489736
H9	5	342382	546702
H10	5	293969	466239
H11	5
H12	5
A1	6
A2	6	342107	539394
A3	6	202593	391978
A4	6	228109	413778
A5	6	231547	370910
A6	6	193615	318316
A7	6	233591	379905
A8	6	244139	390241
A9	6	241921	401418
A10	6	219126	366344
A11	6
A12	6
B1	6
B2	6	359369	481070
B3	6	191840	334813
B4	6	200894	325247
B5	6	246106	384474
B6	6	198802	330756
B7	6	235374	377303
B8	6	238797	359815
B9	6	240502	384027
B10	6	197856	330206
B11	6
B12	6
C1	6
C2	6	360642	522304
C3	6	203021	357619
C4	6	193753	320678
C5	6	266914	410641
C6	6	201318	353410
C7	6	251599	403058
C8	6	235935	367793
C9	6	249239	391220
C10	6	208230	342216
C11	6
C12	6
D1	6
D2	6	382395	520202
D3	6	226377	377248
D4	6	225600	346988
D5	6	321699	516511
D6	6	217313	394823
D7	6	275345	445828
D8	6	249704	395344
D9	6	260015	416134
D10	6	242072	402917
D11	6
D12	6
E1	6
E2	6	436436	584133
E3	6	247561	419044
E4	6	270492	400843
E5	6	346901	491168
E6	6	265960	413428
E7	6	316234	469280
E8	6	313185	485935
E9	6	299975	477687
E10	6	243467	400896
E11	6
E12	6
F1	6
F2	6	437524	627868
F3	6	258622	436139
F4	6	274184	419674
F5	6	391016	674829
F6	6	254412	496602
F7	6	300483	507569
F8	6	318612	493684
F9	6	339234	540826
F10	6	278481	455739
F11	6
F12	6
G1	6
G2	6	513767	681638
G3	6	328362	539408
G4	6	341787	499494
G5	6	404588	647235
G6	6	282973	515377
G7	6	308198	492198
G8	6	307100	498721
G9	6	354751	549868
G10	6	262126	442060
G11	6
G12	6
H1	6
H2	6	484478	648520
H3	6	319407	515121
H4	6	296864	437955
H5	6	470872	615200
H6	6	307456	477391
H7	6	370463	545894
H8	6	323506	488736
H9	6	342211	545903
H10	6	294314	465278
H11	6
H12	6
A1	7
A2	7	343495	539560
A3	7	203300	391639
A4	7	228662	413716
A5	7	231868	370063
A6	7	194668	317783
A7	7	233917	379945
A8	7	244608	390616
A9	7	241932	400845
A10	7	219472	365887
A11	7
A12	7
B1	7
B2	7	360789	480867
B3	7	192898	334476
B4	7	200946	325178
B5	7	247240	385145
B6	7	199625	330692
B7	7	235963	376970
B8	7	239256	360040
B9	7	241569	384112
B10	7	198218	330079
B11	7
B12	7
C1	7
C2	7	361349	522366
C3	7	203326	357072
C4	7	194484	320877
C5	7	267402	410748
C6	7	201653	353147
C7	7	251621	403583
C8	7	236745	367873
C9	7	250426	390978
C10	7	209340	341972
C11	7
C12	7
D1	7
D2	7	383613	519963
D3	7	227215	377366
D4	7	226047	346812
D5	7	322876	516193
D6	7	217722	394577
D7	7	276439	446248
D8	7	250503	395849
D9	7	260953	416423
D10	7	243409	403077
D11	7
D12	7
E1	7
E2	7	438201	584658
E3	7	248325	418589
E4	7	270492	400076
E5	7	347978	491482
E6	7	266321	413207
E7	7	317113	469419
E8	7	314658	486178
E9	7	300471	477985
E10	7	244211	400791
E11	7
E12	7
F1	7
F2	7	438153	629246
F3	7	259351	436314
F4	7	273812	419346
F5	7	391992	677779
F6	7	254359	497103
F7	7	301174	507182
F8	7	320228	493617
F9	7	340060	540542
F10	7	279944	456266
F11	7
F12	7
G1	7
G2	7	515713	681546
G3	7	328869	539726
G4	7	342837	499558
G5	7	405315	646844
G6	7	283760	515763
G7	7	309162	492420
G8	7	307904	499323
G9	7	355802	550470
G10	7	262812	442234
G11	7
G12	7
H1	7
H2	7	485733	648309
H3	7	320767	515371
H4	7	296961	437542
H5	7	472687	615079
H6	7	308146	477577
H7	7	371191	546173
H8	7	324805	489079
H9	7	342756	545849
H10	7	295422	464844
H11	7
H12	7
A1	8
A2	8	344351	539547
A3	8	203511	391768
A4	8	229150	413605
A5	8	232338	370598
A6	8	194319	318024
A7	8	234273	380321
A8	8	245296	389852
A9	8	242559	401267
A10	8	219820	365229
A11	8
A12	8
B1	8
B2	8	362051	481041
B3	8	192774	334873
B4	8	201352	325046
B5	8	248100	385367
B6	8	200397	330421
B7	8	236024	376750
B8	8	239851	359481
B9	8	241283	384366
B10	8	198591	329661
B11	8
B12	8
C1	8
C2	8	362637	522431
C3	8	204339	357654
C4	8	195086	320276
C5	8	268660	410675
C6	8	202240	353029
C7	8	252283	402887
C8	8	236786	368071
C9	8	250843	391345
C10	8	209323	342140
C11	8
C12	8
D1	8
D2	8	384617	520326
D3	8	227631	377209
D4	8	226284	347007
D5	8	323399	516752
D6	8	218680	394580
D7	8	276821	445843
D8	8	250878	395654
D9	8	261373	416471
D10	8	243736	403158
D11	8
D12	8
E1	8
E2	8	439039	584951
E3	8	248720	419342
E4	8	270627	400708
E5	8	349484	491616
E6	8	266745	413137
E7	8	317321	469113
E8	8	315326	486505
E9	8	301035	477651
E10	8	244752	400845
E11	8
E12	8
F1	8
F2	8	438623	628619
F3	8	260380	436458
F4	8	274588	419633
F5	8	392455	678196
F6	8	254802	496725
F7	8	301745	507834
F8	8	320564	493746
F9	8	341730	541213
F10	8	281011	456479
F11	8
F12	8
G1	8
G2	8	517442	682109
G3	8	330197	539753
G4	8	343394	499642
G5	8	406183	646748
G6	8	284038	515827
G7	8	309702	492895
G8	8	307978	499179
G9	8	356602	550459
G10	8	263554	441748
G11	8
G12	8
H1	8
H2	8	488085	646488
H3	8	321292	514350
H4	8	297724	438131
H5	8	472964	614068
H6	8	309076	476982
H7	8	371694	546092
H8	8	325293	488482
H9	8	343355	545347
H10	8	295373	464913
H11	8
H12	8
A1	9
A2	9	345716	538994
A3	9	204731	391984
A4	9	230146	413355
A5	9	233278	370344
A6	9	194960	317485
A7	9	235207	379912
A8	9	246011	389867
A9	9	242452	400668
A10	9	220262	365220
A11	9
A12	9
B1	9
B2	9	362057	481166
B3	9	193452	334642
B4	9	201522	325339
B5	9	248488	385204
B6	9	200645	329871
B7	9	236785	376886
B8	9	240246	359467
B9	9	242053	384458
B10	9	198797	329337
B11	9
B12	9
C1	9
C2	9	363494	522490
C3	9	204750	356902
C4	9	195155	320873
C5	9	268708	410652
C6	9	202840	352719
C7	9	252795	403143
C8	9	237543	368112
C9	9	251470	391412
C10	9	210007	342222
C11	9
C12	9
D1	9
D2	9	385233	519480
D3	9	227995	377310
D4	9	226933	346490
D5	9	324105	516624
D6	9	218892	394277
D7	9	277036	445302
D8	9	251769	395725
D9	9	261804	416228
D10	9	244564	403143
D11	9
D12	9
E1	9
E2	9	439957	584810
E3	9	249512	419092
E4	9	271347	400769
E5	9	349419	491769
E6	9	267483	413101
E7	9	318306	469270
E8	9	315831	486606
E9	9	301475	477329
E10	9	245319	401141
E11	9
E12	9
F1	9
F2	9	439956	628923
F3	9	260886	436347
F4	9	275097	418828
F5	9	393543	677859
F6	9	254458	496811
F7	9	302112	507789
F8	9	321075	493948
F9	9	341335	540580
F10	9	281630	457133
F11	9
F12	9
G1	9
G2	9	518904	682252
G3	9	330962	540167
G4	9	343390	499786
G5	9	406830	646793
G6	9	284771	515682
G7	9	309847	493035
G8	9	307882	499548
G9	9	356716	550516
G10	9	264364	441721
G11	9
G12	9
H1	9
H2	9	488548	647364
H3	9	322124	514484
H4	9	298272	437707
H5	9	473550	615702
H6	9	308387	477052
H7	9	372349	546222
H8	9	325499	488263
H9	9	342803	544824
H10	9	296640	464823
H11	9
H12	9
A1	10
A2	10	345654	538720
A3	10	204678	391260
A4	10	230258	413121
A5	10	233408	370432
A6	10	195110	317767
A7	10	235737	379919
A8	10	246199	389682
A9	10	242786	400680
A10	10	220179	364886
A11	10
A12	10
B1	10
B2	10	363154	480722
B3	10	194138	334726
B4	10	202334	325092
B5	10	248800	385263
B6	10	200626	330109
B7	10	236841	377243
B8	10	240434	359525
B9	10	243153	384004
B10	10	198949	329545
B11	10
B12	10
C1	10
C2	10	364816	522497
C3	10	204854	357153
C4	10	195664	320716
C5	10	269641	411044
C6	10	202757	352826
C7	10	252966	403139
C8	10	237621	368401
C9	10	251936	391542
C10	10	210393	342170
C11	10
C12	10
D1	10
D2	10	385736	519964
D3	10	228442	377644
D4	10	227820	346621
D5	10	324744	516545
D6	10	219773	394124
D7	10	277667	445587
D8	10	251776	395946
D9	10	262431	416294
D10	10	245550	403303
D11	10
D12	10
E1	10
E2	10	439987	585608
E3	10	249268	418710
E4	10	272245	400494
E5	10	349758	492318
E6	10	267277	412576
E7	10	318733	468881
E8	10	316575	486456
E9	10	302007	477254
E10	10	246028	401189
E11	10
E12	10
F1	10
F2	10	439491	629023
F3	10	260802	436784
F4	10	275772	419200
F5	10	393761	677319
F6	10	254887	496784
F7	10	302559	507707
F8	10	321890	494584
F9	10	342886	541428
F10	10	282524	456966
F11	10
F12	10
G1	10
G2	10	520546	682512
G3	10	331633	540207
G4	10	344244	500392
G5	10	406975	647085
G6	10	284686	515576
G7	10	310405	492994
G8	10	307720	499333
G9	10	357619	549743
G10	10	264852	441803
G11	10
G12	10
H1	10
H2	10	488714	646972
H3	10	322190	514382
H4	10	299071	437752
H5	10	474576	614564
H6	10	309406	476526
H7	10	372595	545510
H8	10	326169	488355
H9	10	343159	544499
H10	10	296433	464375
H11	10
H12	10
A1	11
A2	11	346363	538088
A3	11	205412	391379
A4	11	231341	413142
A5	11	234284	370272
A6	11	195769	317422
A7	11	236039	379752
A8	11	246686	389731
A9	11	242931	400588
A10	11	220625	364376
A11	11
A12	11
B1	11
B2	11	363483	480810
B3	11	194116	334705
B4	11	202445	324882
B5	11	249382	385422
B6	11	201162	329940
B7	11	237999	376291
B8	11	240951	359494
B9	11	243058	383819
B10	11	199568	328982
B11	11
B12	11
C1	11
C2	11	364719	522968
C3	11	205220	356955
C4	11	196089	319757
C5	11	269980	410787
C6	11	203021	352281
C7	11	253411	402921
C8	11	238039	368426
C9	11	252353	390980
C10	11	210911	342318
C11	11
C12	11
D1	11
D2	11	386516	520257
D3	11	229121	377463
D4	11	228066	346334
D5	11	325764	516518
D6	11	220095	393744
D7	11	278573	445733
D8	11	252399	395975
D9	11	263105	416342
D10	11	245629	402925
D11	11
D12	11
E1	11
E2	11	441446	585449
E3	11	250337	418217
E4	11	272223	399468
E5	11	350190	491959
E6	11	267845	412674
E7	11	319094	468667
E8	11	316845	486810
E9	11	302272	477150
E10	11	246299	401588
E11	11
E12	11
F1	11
F2	11	439541	628200
F3	11	261968	436851
F4	11	275927	419093
F5	11	394767	676917
F6	11	254862	496320
F7	11	302387	507877
F8	11	322200	494116
F9	11	343620	540872
F10	11	282739	456384
F11	11
F12	11
G1	11
G2	11	522174	682071
G3	11	332002	540534
G4	11	344485	500589
G5	11	407676	646682
G6	11	284872	515173
G7	11	311060	493359
G8	11	307779	499035
G9	11	358348	550078
G10	11	265223	441639
G11	11
G12	11
H1	11
H2	11	490040	645380
H3	11	323111	514635
H4	11	299340	437163
H5	11	473911	612997
H6	11	309760	476590
H7	11	373804	544786
H8	11	326389	487993
H9	11	343026	544456
H10	11	297755	464461
H11	11
H12	11
A1	12
A2	12	347660	538190
A3	12	206104	391425
A4	12	230975	413236
A5	12	234577	370247
A6	12	196183	317169
A7	12	236299	379653
A8	12	247267	389640
A9	12	243375	400476
A10	12	220642	364177
A11	12
A12	12
B1	12
B2	12	363418	480120
B3	12	194527	334504
B4	12	202881	324935
B5	12	249666	385321
B6	12	201194	329560
B7	12	238112	376501
B8	12	241268	359319
B9	12	243601	383502
B10	12	199537	328511
B11	12
B12	12
C1	12
C2	12	365295	522526
C3	12	205497	357144
C4	12	196351	320066
C5	12	270602	410759
C6	12	203783	352178
C7	12	253540	402756
C8	12	238416	368048
C9	12	252624	390971
C10	12	210826	342128
C11	12
C12	12
D1	12
D2	12	386747	519261
D3	12	229423	377077
D4	12	228284	346517
D5	12	325611	516687
D6	12	219877	392699
D7	12	278318	445023
D8	12	252360	395512
D9	12	263512	416578
D10	12	246364	403082
D11	12
D12	12
E1	12
E2	12	441548	585285
E3	12	250072	418606
E4	12	272582	400294
E5	12	350387	491896
E6	12	268063	411853
E7	12	319111	468830
E8	12	317364	486249
E9	12	302341	477082
E10	12	246602	401404
E11	12
E12	12
F1	12
F2	12	440244	628523
F3	12	262354	436725
F4	12	275782	418840
F5	12	394887	675733
F6	12	254881	496608
F7	12	302743	507568
F8	12	322858	493995
F9	12	343662	540526
F10	12	283576	456694
F11	12
F12	12
G1	12
G2	12	522268	682942
G3	12	333162	540466
G4	12	344893	500251
G5	12	408078	645320
G6	12	285130	515571
G7	12	310926	493186
G8	12	308007	498864
G9	12	358692	550235
G10	12	265526	441389
G11	12
G12	12
H1	12
H2	12	490710	644830
H3	12	324317	514295
H4	12	299353	437277
H5	12	474499	613395
H6	12	310264	476431
H7	12	373646	545279
H8	12	327127	487856
H9	12	342799	543824
H10	12	298088	464220
H11	12
H12	12
A1	13
A2	13	347914	538273
A3	13	205819	390883
A4	13	231617	412847
A5	13	234902	370155
A6	13	196161	317035
A7	13	236356	379114
A8	13	247439	389437
A9	13	243392	400280
A10	13	220211	363258
A11	13
A12	13
B1	13
B2	13	363842	480312
B3	13	194993	334699
B4	13	203114	324194
B5	13	249466	385232
B6	13	201466	329607
B7	13	238294	376534
B8	13	241407	358909
B9	13	244077	383718
B10	13	199649	328411
B11	13
B12	13
C1	13
C2	13	366240	522305
C3	13	205567	356893
C4	13	196899	319723
C5	13	270860	410459
C6	13	203706	351662
C7	13	253655	402635
C8	13	238356	367942
C9	13	252967	390454
C10	13	211440	342053
C11	13
C12	13
D1	13
D2	13	387309	519087
D3	13	229436	376926
D4	13	228378	345788
D5	13	326608	516502
D6	13	220171	393194
D7	13	278685	445402
D8	13	253149	395423
D9	13	263383	415546
D10	13	245953	402979
D11	13
D12	13
E1	13
E2	13	442084	585248
E3	13	250887	417581
E4	13	273005	399508
E5	13	350864	492098
E6	13	268584	411680
E7	13	319443	468444
E8	13	317671	485981
E9	13	303009	477035
E10	13	246705	401036
E11	13
E12	13
F1	13
F2	13	440010	628861
F3	13	262485	436308
F4	13	275846	418532
F5	13	395350	674973
F6	13	254320	496526
F7	13	302910	507528
F8	13	323131	493110
F9	13	344164	540183
F10	13	283915	456940
F11	13
F12	13
G1	13
G2	13	523015	682947
G3	13	332985	540749
G4	13	344979	500147
G5	13	408541	646168
G6	13	285222	515757
G7	13	311051	493235
G8	13	308136	498644
G9	13	358845	549972
G10	13	266094	441673
G11	13
G12	13
H1	13
H2	13	490123	645041
H3	13	324757	514073
H4	13	299797	437464
H5	13	474566	614152
H6	13	310542	476258
H7	13	373369	544637
H8	13	326903	487410
H9	13	342283	543738
H10	13	298156	463725
H11	13
H12	13
A1	14
A2	14	348943	537435
A3	14	206952	391000
A4	14	232172	413353
A5	14	234741	370193
A6	14	196117	317005
A7	14	236545	379054
A8	14	247688	389135
A9	14	243461	399693
A10	14	220602	363431
A11	14
A12	14
B1	14
B2	14	363864	480158
B3	14	195656	334553
B4	14	203426	324774
B5	14	249953	384847
B6	14	202093	329996
B7	14	238593	376616
B8	14	241352	358725
B9	14	244162	383550
B10	14	200124	328172
B11	14
B12	14
C1	14
C2	14	366672	522348
C3	14	206089	356734
C4	14	196657	320084
C5	14	270990	410672
C6	14	203918	351376
C7	14	253190	402610
C8	14	238578	367717
C9	14	253294	390782
C10	14	212042	341382
C11	14
C12	14
D1	14
D2	14	387501	519278
D3	14	230075	376613
D4	14	228689	346024
D5	14	326182	516442
D6	14	220376	393200
D7	14	278404	445168
D8	14	253308	395384
D9	14	263768	415974
D10	14	247266	403391
D11	14
D12	14
E1	14
E2	14	442704	585229
E3	14	251239	417335
E4	14	273072	399189
E5	14	350852	491554
E6	14	268602	411574
E7	14	320108	468301
E8	14	317660	485961
E9	14	303020	477072
E10	14	247413	401096
E11	14
E12	14
F1	14
F2	14	439825	627968
F3	14	262604	436349
F4	14	276210	418491
F5	14	395502	676307
F6	14	254338	496327
F7	14	302616	507796
F8	14	323844	493653
F9	14	344668	540467
F10	14	284505	456657
F11	14
F12	14
G1	14
G2	14	524191	682827
G3	14	333465	540895
G4	14	345514	500331
G5	14	408728	646256
G6	14	285702	515204
G7	14	311784	492981
G8	14	308120	498774
G9	14	359415	549420
G10	14	266688	441656
G11	14
G12	14
H1	14
H2	14	490016	644893
H3	14	324621	514408
H4	14	300316	437366
H5	14	474678	613347
H6	14	311155	476132
H7	14	374093	544768
H8	14	327001	487273
H9	14	341950	543831
H10	14	298420	463500
H11	14
H12	14
A1	15
A2	15	348986	537126
A3	15	206869	391127
A4	15	232738	413209
A5	15	235721	369964
A6	15	196848	316436
A7	15	237176	379025
A8	15	247890	389283
A9	15	243133	399856
A10	15	221009	362832
A11	15
A12	15
B1	15
B2	15	365342	479778
B3	15	195614	334833
B4	15	203634	324266
B5	15	250396	385639
B6	15	202348	329392
B7	15	238885	375990
B8	15	242023	358595
B9	15	244694	383494
B10	15	200583	327935
B11	15
B12	15
C1	15
C2	15	366726	522061
C3	15	205975	356669
C4	15	196658	319435
C5	15	271716	410291
C6	15	204019	351274
C7	15	254096	402400
C8	15	238897	367801
C9	15	253296	390916
C10	15	211854	342075
C11	15
C12	15
D1	15
D2	15	387651	519297
D3	15	230424	377262
D4	15	229335	345938
D5	15	326618	516646
D6	15	221073	392820
D7	15	278809	445093
D8	15	253569	395618
D9	15	264225	416205
D10	15	247302	403018
D11	15
D12	15
E1	15
E2	15	443325	585372
E3	15	251470	417623
E4	15	273563	399624
E5	15	351467	491569
E6	15	269381	411330
E7	15	320074	468266
E8	15	318570	486079
E9	15	303215	476560
E10	15	247447	400925
E11	15
E12	15
F1	15
F2	15	440572	628190
F3	15	263812	436371
F4	15	276779	418415
F5	15	395554	675461
F6	15	254521	496504
F7	15	303503	507939
F8	15	324373	493984
F9	15	345005	540255
F10	15	284876	456896
F11	15
F12	15
G1	15
G2	15	525768	683087
G3	15	334769	540357
G4	15	345688	499988
G5	15	409668	646488
G6	15	285824	515160
G7	15	311530	493235
G8	15	307920	498858
G9	15	359191	549562
G10	15	266180	441657
G11	15
G12	15
H1	15
H2	15	491782	645583
H3	15	325590	514246
H4	15	300381	437367
H5	15	475258	613250
H6	15	311695	475919
H7	15	374539	544917
H8	15	327246	487462
H9	15	342375	543280
H10	15	298706	463608
H11	15
H12	15
A1	16
A2	16	349668	537753
A3	16	207238	390594
A4	16	232739	413262
A5	16	236058	370083
A6	16	196923	316512
A7	16	237498	378920
A8	16	248163	389088
A9	16	243604	399611
A10	16	221081	361892
A11	16
A12	16
B1	16
B2	16	364346	479758
B3	16	196104	334297
B4	16	203454	324380
B5	16	250618	385366
B6	16	201826	329120
B7	16	239075	376231
B8	16	242025	358596
B9	16	244546	383450
B10	16	200252	327626
B11	16
B12	16
C1	16
C2	16	367235	522269
C3	16	206737	356717
C4	16	197221	319857
C5	16	271660	410460
C6	16	204402	351663
C7	16	253912	401876
C8	16	239074	367044
C9	16	253513	390979
C10	16	212132	341579
C11	16
C12	16
D1	16
D2	16	388194	519052
D3	16	230751	376951
D4	16	229278	346366
D5	16	327378	516756
D6	16	221499	392730
D7	16	279381	445065
D8	16	253801	395364
D9	16	264860	416031
D10	16	247567	403238
D11	16
D12	16
E1	16
E2	16	443690	584725
E3	16	251402	417388
E4	16	274191	399366
E5	16	351612	492094
E6	16	268531	411781
E7	16	320156	468323
E8	16	318698	486227
E9	16	303308	476475
E10	16	247523	400715
E11	16
E12	16
F1	16
F2	16	440954	628266
F3	16	263492	436610
F4	16	276689	418210
F5	16	396541	676339
F6	16	254493	496836
F7	16	303498	507918
F8	16	324290	493808
F9	16	345889	539736
F10	16	285249	456323
F11	16
F12	16
G1	16
G2	16	526307	682668
G3	16	335173	540491
G4	16	345706	500154
G5	16	409584	645555
G6	16	286143	515548
G7	16	312349	493244
G8	16	307634	498440
G9	16	359182	549267
G10	16	267127	441683
G11	16
G12	16
H1	16
H2	16	491726	644845
H3	16	325380	513705
H4	16	300626	437123
H5	16	475311	613406
H6	16	311901	475823
H7	16	375473	544440
H8	16	328264	487284
H9	16	341830	543016
H10	16	299040	463196
H11	16
H12	16
A1	17
A2	17	349997	537433
A3	17	207545	390952
A4	17	233344	412753
A5	17	236176	369461
A6	17	197135	316265
A7	17	237563	378863
A8	17	249160	388949
A9	17	243312	399360
A10	17	221440	361911
A11	17
A12	17
B1	17
B2	17	364781	479723
B3	17	196767	334506
B4	17	204262	324188
B5	17	251022	384952
B6	17	202653	329449
B7	17	239397	376112
B8	17	242532	358668
B9	17	245393	383053
B10	17	200983	327420
B11	17
B12	17
C1	17
C2	17	367569	522418
C3	17	207087	356508
C4	17	197270	319458
C5	17	272043	410901
C6	17	204581	351437
C7	17	254165	402129
C8	17	239119	367734
C9	17	253684	390757
C10	17	212644	341680
C11	17
C12	17
D1	17
D2	17	389115	519186
D3	17	231093	377288
D4	17	229278	346010
D5	17	327821	516508
D6	17	221616	393150
D7	17	279064	445098
D8	17	253515	395533
D9	17	265279	415902
D10	17	247903	402927
D11	17
D12	17
E1	17
E2	17	444260	585097
E3	17	251891	417176
E4	17	274314	398897
E5	17	351793	491570
E6	17	269211	411103
E7	17	320543	468367
E8	17	318979	485677
E9	17	303310	476806
E10	17	247978	400661
E11	17
E12	17
F1	17
F2	17	440880	628133
F3	17	263574	435989
F4	17	277245	418135
F5	17	396773	675811
F6	17	254025	496216
F7	17	303478	508400
F8	17	324890	493466
F9	17	346422	540102
F10	17	285012	456470
F11	17
F12	17
G1	17
G2	17	526491	682762
G3	17	335650	540221
G4	17	345811	500174
G5	17	409771	645577
G6	17	286047	515184
G7	17	311881	493082
G8	17	307391	498424
G9	17	359857	549083
G10	17	267519	441238
G11	17
G12	17
H1	17
H2	17	492343	645590
H3	17	326127	513873
H4	17	300998	437547
H5	17	475570	612152
H6	17	312069	475422
H7	17	375523	544388
H8	17	327631	487479
H9	17	341255	542319
H10	17	298565	463085
H11	17
H12	17
A1	18
A2	18	349814	536801
A3	18	207569	391145
A4	18	233272	412441
A5	18	236282	369630
A6	18	196759	315955
A7	18	237371	378689
A8	18	249072	389273
A9	18	243816	399269
A10	18	221598	361750
A11	18
A12	18
B1	18
B2	18	364839	479411
B3	18	196417	334201
B4	18	203683	323805
B5	18	251617	385342
B6	18	202877	329287
B7	18	239592	375815
B8	18	243035	358308
B9	18	245974	383020
B10	18	201427	327540
B11	18
B12	18
C1	18
C2	18	368020	522415
C3	18	207084	356578
C4	18	197732	319162
C5	18	272245	410081
C6	18	204864	351366
C7	18	254176	402038
C8	18	238832	367568
C9	18	253807	390411
C10	18	212943	341665
C11	18
C12	18
D1	18
D2	18	388716	518513
D3	18	231393	377181
D4	18	229784	345804
D5	18	327655	516383
D6	18	221854	392708
D7	18	279609	444665
D8	18	253783	395799
D9	18	265311	415520
D10	18	248426	403166
D11	18
D12	18
E1	18
E2	18	444216	585103
E3	18	252588	416571
E4	18	274073	398667
E5	18	351648	492011
E6	18	269435	410945
E7	18	320653	467935
E8	18	319392	486098
E9	18	302663	476025
E10	18	247961	401112
E11	18
E12	18
F1	18
F2	18	440634	627304
F3	18	264413	436395
F4	18	277016	418626
F5	18	397043	674798
F6	18	253986	496169
F7	18	303493	507394
F8	18	324552	493120
F9	18	346127	540241
F10	18	285759	456735
F11	18
F12	18
G1	18
G2	18	527347	682509
G3	18	334965	540452
G4	18	346282	500067
G5	18	409681	646192
G6	18	285955	515204
G7	18	312239	493327
G8	18	307224	498318
G9	18	359944	548996
G10	18	268156	441533
G11	18
G12	18
H1	18
H2	18	492404	643802
H3	18	326243	513806
H4	18	300751	437255
H5	18	476328	613353
H6	18	312856	475286
H7	18	376685	543955
H8	18	328325	486901
H9	18	340864	542662
H10	18	299373	462745
H11	18
H12	18
A1	19
A2	19	350814	536637
A3	19	208262	390819
A4	19	233700	412281
A5	19	236642	369828
A6	19	197172	316026
A7	19	237933	378838
A8	19	249858	388732
A9	19	244067	399013
A10	19	221468	361410
A11	19
A12	19
B1	19
B2	19	365096	479331
B3	19	196802	333932
B4	19	204136	324399
B5	19	251199	385118
B6	19	203075	329666
B7	19	239785	376168
B8	19	244008	358454
B9	19	246708	382756
B10	19	202162	327178
B11	19
B12	19
C1	19
C2	19	368144	521989
C3	19	207414	356252
C4	19	198103	319167
C5	19	272708	410366
C6	19	204952	351249
C7	19	254641	402207
C8	19	239454	367112
C9	19	254251	390352
C10	19	213275	341203
C11	19
C12	19
D1	19
D2	19	389243	518719
D3	19	231374	376681
D4	19	230101	345652
D5	19	328160	516316
D6	19	221876	392266
D7	19	279753	444698
D8	19	254157	395471
D9	19	265571	415435
D10	19	248345	402737
D11	19
D12	19
E1	19
E2	19	444629	584315
E3	19	252860	416316
E4	19	274231	398947
E5	19	351865	491954
E6	19	269570	410811
E7	19	320528	467806
E8	19	319444	486040
E9	19	302826	476172
E10	19	247921	400511
E11	19
E12	19
F1	19
F2	19	440983	627601
F3	19	263769	435575
F4	19	277959	417881
F5	19	396508	675062
F6	19	253756	496652
F7	19	303979	508058
F8	19	325214	494035
F9	19	346622	539528
F10	19	285749	456301
F11	19
F12	19
G1	19
G2	19	528845	682508
G3	19	334899	540451
G4	19	346037	500253
G5	19	409790	644880
G6	19	285961	515238
G7	19	312283	493402
G8	19	306640	498217
G9	19	360980	549032
G10	19	268200	440988
G11	19
G12	19
H1	19
H2	19	492871	643395
H3	19	326269	514311
H4	19	301121	437334
H5	19	477399	611628
H6	19	314221	475334
H7	19	377735	543232
H8	19	328543	486684
H9	19	340481	542107
H10	19	299602	463411
H11	19
H12	19
A1	20
A2	20	351114	536435
A3	20	208314	391333
A4	20	233626	412903
A5	20	237361	369562
A6	20	197134	316159
A7	20	237766	378661
A8	20	251037	388626
A9	20	244570	399700
A10	20	222532	362006
A11	20
A12	20
B1	20
B2	20	365548	478761
B3	20	197187	334325
B4	20	204745	323924
B5	20	251991	385217
B6	20	203098	329177
B7	20	240280	376123
B8	20	245151	357918
B9	20	248537	382915
B10	20	203336	327086
B11	20
B12	20
C1	20
C2	20	368906	522042
C3	20	207636	356353
C4	20	197591	318989
C5	20	273166	410604
C6	20	205207	350857
C7	20	254671	402254
C8	20	239187	367478
C9	20	254444	390554
C10	20	213332	341061
C11	20
C12	20
D1	20
D2	20	389171	518661
D3	20	232203	376753
D4	20	230184	345671
D5	20	328758	516199
D6	20	222020	391859
D7	20	279829	444513
D8	20	254390	394987
D9	20	265869	415850
D10	20	248972	403251
D11	20
D12	20
E1	20
E2	20	445191	585138
E3	20	252525	416532
E4	20	274553	398203
E5	20	352025	491961
E6	20	269472	410771
E7	20	321080	467981
E8	20	319711	485609
E9	20	303876	475761
E10	20	248480	401026
E11	20
E12	20
F1	20
F2	20	440778	627349
F3	20	264725	436292
F4	20	277650	417240
F5	20	397164	676036
F6	20	253467	495991
F7	20	304389	507594
F8	20	325253	493244
F9	20	347352	539776
F10	20	286302	456751
F11	20
F12	20
G1	20
G2	20	529759	682965
G3	20	336486	540954
G4	20	346183	499972
G5	20	410188	644558
G6	20	286195	515108
G7	20	312592	493510
G8	20	307138	498206
G9	20	360939	549238
G10	20	268541	441495
G11	20
G12	20
H1	20
H2	20	494074	643854
H3	20	326258	513581
H4	20	301452	437464
H5	20	479424	611262
H6	20	316006	475989
H7	20	380384	543980
H8	20	328488	487020
H9	20	340585	541833
H10	20	299830	462950
H11	20
H12	20
A1	21
A2	21	351908	536104
A3	21	208516	390838
A4	21	234147	412372
A5	21	237300	368998
A6	21	197440	315772
A7	21	237729	378368
A8	21	252502	388720
A9	21	245908	399538
A10	21	224074	360856
A11	21
A12	21
B1	21
B2	21	366044	478768
B3	21	197678	334347
B4	21	205148	323691
B5	21	251822	384901
B6	21	203505	329141
B7	21	240319	375752
B8	21	247768	358606
B9	21	251046	383203
B10	21	205724	326872
B11	21
B12	21
C1	21
C2	21	369217	522100
C3	21	207664	356192
C4	21	198276	318992
C5	21	273006	410480
C6	21	205442	350823
C7	21	254356	402293
C8	21	239821	367500
C9	21	255164	390357
C10	21	214086	341488
C11	21
C12	21
D1	21
D2	21	390380	518948
D3	21	232422	376711
D4	21	230819	345354
D5	21	328852	516327
D6	21	222629	392661
D7	21	280529	444392
D8	21	254325	395542
D9	21	266201	415843
D10	21	248905	402947
D11	21
D12	21
E1	21
E2	21	445086	584389
E3	21	252254	416016
E4	21	274841	398198
E5	21	352432	491633
E6	21	269691	410365
E7	21	321255	467615
E8	21	319849	485948
E9	21	303347	475550
E10	21	248605	400834
E11	21
E12	21
F1	21
F2	21	441326	627162
F3	21	265072	436050
F4	21	277706	417206
F5	21	397233	675968
F6	21	253593	495841
F7	21	303669	507808
F8	21	325518	492849
F9	21	347618	539885
F10	21	286428	456761
F11	21
F12	21
G1	21
[truncated: 10,871 more rows]

## Sheet: Amplification Data
Block Type	96alum
Chemistry	SYBR_GREEN
Experiment File Name	D:\HAIFENG\CBF78Untitled.eds
Experiment Run End Time	2013-01-10 10:21:38 AM CST
Instrument Type	sds7500
Passive Reference	ROX
Well	Cycle	Target Name	Rn	ΔRn
A1	1
A1	2
A1	3
A1	4
A1	5
A1	6
A1	7
A1	8
A1	9
A1	10
A1	11
A1	12
A1	13
A1	14
A1	15
A1	16
A1	17
A1	18
A1	19
A1	20
A1	21
A1	22
A1	23
A1	24
A1	25
A1	26
A1	27
A1	28
A1	29
A1	30
A1	31
A1	32
A1	33
A1	34
A1	35
A1	36
A1	37
A1	38
A1	39
A1	40
A2	1	CBF7	0.624296	-0.00788397
A2	2	CBF7	0.627581	-0.00564676
A2	3	CBF7	0.62927	-0.00500493
A2	4	CBF7	0.630759	-0.00456296
A2	5	CBF7	0.632254	-0.00411526
A2	6	CBF7	0.634244	-0.00317237
A2	7	CBF7	0.63662	-0.00184335
A2	8	CBF7	0.638223	-0.00128735
A2	9	CBF7	0.641409	0.000851744
A2	10	CBF7	0.641621	1.63328e-05
A2	11	CBF7	0.643693	0.00104142
A2	12	CBF7	0.64598	0.0022812
A2	13	CBF7	0.646353	0.00160744
A2	14	CBF7	0.649274	0.00348112
A2	15	CBF7	0.649728	0.00288818
A2	16	CBF7	0.650239	0.00235181
A2	17	CBF7	0.651239	0.00230467
A2	18	CBF7	0.651665	0.00168335
A2	19	CBF7	0.653727	0.00269879
A2	20	CBF7	0.654533	0.0024571
A2	21	CBF7	0.656418	0.00329527
A2	22	CBF7	0.656207	0.00203672
A2	23	CBF7	0.656382	0.00116471
A2	24	CBF7	0.65611	-0.000154093
A2	25	CBF7	0.65851	0.001199
A2	26	CBF7	0.659444	0.00108534
A2	27	CBF7	0.659969	0.000563331
A2	28	CBF7	0.661366	0.000913456
A2	29	CBF7	0.661577	7.66734e-05
A2	30	CBF7	0.661986	-0.000561149
A2	31	CBF7	0.663064	-0.000530385
A2	32	CBF7	0.664825	0.000183447
A2	33	CBF7	0.664378	-0.00131083
A2	34	CBF7	0.666726	-9.6569e-06
A2	35	CBF7	0.667084	-0.000698202
A2	36	CBF7	0.667407	-0.00142269
A2	37	CBF7	0.667439	-0.00243799
A2	38	CBF7	0.667712	-0.00321177
A2	39	CBF7	0.668113	-0.00385811
A2	40	CBF7	0.669075	-0.00394322
A3	1	CBF7	0.506956	-0.00770327
A3	2	CBF7	0.509872	-0.00568354
A3	3	CBF7	0.510822	-0.00562976
A3	4	CBF7	0.514419	-0.0029297
A3	5	CBF7	0.515572	-0.00267284
A3	6	CBF7	0.516848	-0.00229349
A3	7	CBF7	0.5191	-0.000938294
A3	8	CBF7	0.519469	-0.00146631
A3	9	CBF7	0.522295	0.000463061
A3	10	CBF7	0.523125	0.00039615
A3	11	CBF7	0.52484	0.00121526
A3	12	CBF7	0.526549	0.00202704
A3	13	CBF7	0.52655	0.00113175
A3	14	CBF7	0.529289	0.00297373
A3	15	CBF7	0.528905	0.00169399
A3	16	CBF7	0.530572	0.00246404
A3	17	CBF7	0.53087	0.00186588
A3	18	CBF7	0.53067	0.000769056
A3	19	CBF7	0.532886	0.00208825
A3	20	CBF7	0.53232	0.000625816
A3	21	CBF7	0.533512	0.000920645
A3	22	CBF7	0.534274	0.000786142
A3	23	CBF7	0.537107	0.00272236
A3	24	CBF7	0.535301	2.00935e-05
A3	25	CBF7	0.538966	0.00278863
A3	26	CBF7	0.538416	0.00134182
A3	27	CBF7	0.538757	0.000786386
A3	28	CBF7	0.539298	0.000430273
A3	29	CBF7	0.540285	0.000520598
A3	30	CBF7	0.541342	0.000681317
A3	31	CBF7	0.540706	-0.000851391
A3	32	CBF7	0.542213	-0.0002403
A3	33	CBF7	0.54226	-0.00109083
A3	34	CBF7	0.543278	-0.000968857
A3	35	CBF7	0.544285	-0.000858623
A3	36	CBF7	0.544533	-0.00150751
A3	37	CBF7	0.544394	-0.00254318
A3	38	CBF7	0.546135	-0.00169796
A3	39	CBF7	0.545707	-0.00302325
A3	40	CBF7	0.545267	-0.00435968
A4	1	CBF7	0.542756	-0.00613807
A4	2	CBF7	0.544625	-0.0051389
A4	3	CBF7	0.546972	-0.00366165
A4	4	CBF7	0.546503	-0.00500029
A4	5	CBF7	0.548872	-0.00350093
A4	6	CBF7	0.551284	-0.0019584
A4	7	CBF7	0.552702	-0.0014105
A4	8	CBF7	0.554032	-0.00095058
A4	9	CBF7	0.556774	0.000922092
A4	10	CBF7	0.557362	0.000640713
A4	11	CBF7	0.559956	0.00236431
A4	12	CBF7	0.558941	0.000479629
A4	13	CBF7	0.561025	0.00169427
A4	14	CBF7	0.561681	0.00148048
A4	15	CBF7	0.563246	0.00217572
A4	16	CBF7	0.563175	0.00123571
A4	17	CBF7	0.565335	0.00252611
A4	18	CBF7	0.565588	0.00190903
A4	19	CBF7	0.566848	0.00229904
A4	20	CBF7	0.565813	0.000394566
A4	21	CBF7	0.567806	0.00151795
A4	22	CBF7	0.568156	0.00099821
A4	23	CBF7	0.570282	0.00225505
A4	24	CBF7	0.570235	0.00133846
A4	25	CBF7	0.570285	0.000518792
A4	26	CBF7	0.572292	0.00165582
A4	27	CBF7	0.572922	0.00141563
A4	28	CBF7	0.571737	-0.000638987
A4	29	CBF7	0.574403	0.00115769
A4	30	CBF7	0.574043	-7.18804e-05
A4	31	CBF7	0.575569	0.000584023
A4	32	CBF7	0.576958	0.00110349
A4	33	CBF7	0.575308	-0.00141592
A4	34	CBF7	0.576196	-0.00139767
A4	35	CBF7	0.577209	-0.00125437
A4	36	CBF7	0.576927	-0.00240586
A4	37	CBF7	0.578422	-0.00178053
A4	38	CBF7	0.578683	-0.0023892
A4	39	CBF7	0.579112	-0.00283002
A4	40	CBF7	0.581123	-0.00168911
A5	1	CBF7	0.615451	-0.00684312
A5	2	CBF7	0.617078	-0.00608779
A5	3	CBF7	0.618154	-0.00588327
A5	4	CBF7	0.620104	-0.00480482
A5	5	CBF7	0.622808	-0.00297291
A5	6	CBF7	0.624268	-0.00238429
A5	7	CBF7	0.626564	-0.000959897
A5	8	CBF7	0.626927	-0.00146866
A5	9	CBF7	0.629896	0.00062867
A5	10	CBF7	0.630095	-4.35894e-05
A5	11	CBF7	0.632735	0.00172454
A5	12	CBF7	0.633568	0.00168606
A5	13	CBF7	0.634604	0.00184982
A5	14	CBF7	0.634103	0.000477144
A5	15	CBF7	0.637147	0.00264993
A5	16	CBF7	0.637852	0.00248276
A5	17	CBF7	0.639244	0.00300319
A5	18	CBF7	0.639239	0.00212613
A5	19	CBF7	0.63987	0.00188601
A5	20	CBF7	0.642277	0.00342073
A5	21	CBF7	0.643092	0.00336442
A5	22	CBF7	0.642034	0.00143498
A5	23	CBF7	0.644264	0.00279304
A5	24	CBF7	0.643132	0.000789211
A5	25	CBF7	0.644548	0.00133354
A5	26	CBF7	0.644776	0.000689834
A5	27	CBF7	0.64487	-8.79258e-05
A5	28	CBF7	0.647306	0.00147642
A5	29	CBF7	0.646581	-0.000119771
A5	30	CBF7	0.64673	-0.000843112
A5	31	CBF7	0.648078	-0.000366908
A5	32	CBF7	0.649256	-6.02209e-05
A5	33	CBF7	0.648552	-0.00163549
A5	34	CBF7	0.648919	-0.00214032
A5	35	CBF7	0.649037	-0.00289436
A5	36	CBF7	0.650538	-0.00226545
A5	37	CBF7	0.653256	-0.000418695
A5	38	CBF7	0.652517	-0.00202967
A5	39	CBF7	0.652981	-0.0024371
A5	40	CBF7	0.653706	-0.00258377
A6	1	CBF7	0.594036	-0.0126663
A6	2	CBF7	0.599128	-0.00841122
A6	3	CBF7	0.601023	-0.00735357
A6	4	CBF7	0.604795	-0.00441939
A6	5	CBF7	0.607181	-0.0028709
A6	6	CBF7	0.608249	-0.0026408
A6	7	CBF7	0.61258	0.000852829
A6	8	CBF7	0.611021	-0.00154349
A6	9	CBF7	0.614077	0.000675193
A6	10	CBF7	0.614004	-0.000235662
A6	11	CBF7	0.616746	0.00166885
A6	12	CBF7	0.618546	0.00263083
A6	13	CBF7	0.618736	0.00198367
A6	14	CBF7	0.618654	0.00106441
A6	15	CBF7	0.622076	0.00364877
A6	16	CBF7	0.622164	0.00289926
A6	17	CBF7	0.623321	0.00321871
A6	18	CBF7	0.622744	0.00180425
A6	19	CBF7	0.623912	0.00213418
A6	20	CBF7	0.623528	0.000912789
A6	21	CBF7	0.625263	0.00181046
A6	22	CBF7	0.625431	0.00114106
A6	23	CBF7	0.626297	0.00116934
A6	24	CBF7	0.627699	0.00173346
A6	25	CBF7	0.628551	0.00174844
A6	26	CBF7	0.628507	0.000866612
A6	27	CBF7	0.630562	0.00208412
A6	28	CBF7	0.629228	-8.7613e-05
A6	29	CBF7	0.630182	2.91752e-05
A6	30	CBF7	0.629469	-0.00152148
A6	31	CBF7	0.631194	-0.000634
A6	32	CBF7	0.631099	-0.00156643
A6	33	CBF7	0.63169	-0.00181323
A6	34	CBF7	0.632573	-0.00176821
A6	35	CBF7	0.63383	-0.00134839
A6	36	CBF7	0.634346	-0.00166934
A6	37	CBF7	0.635226	-0.001627
A6	38	CBF7	0.636392	-0.00129897
A6	39	CBF7	0.636851	-0.00167791
A6	40	CBF7	0.637199	-0.00216736
A7	1	CBF7	0.604524	-0.00862326
A7	2	CBF7	0.605561	-0.00825259
A7	3	CBF7	0.607639	-0.00684223
A7	4	CBF7	0.610019	-0.00512903
A7	5	CBF7	0.611702	-0.00411194
A7	6	CBF7	0.614866	-0.00161487
A7	7	CBF7	0.615661	-0.00148661
A7	8	CBF7	0.615989	-0.00182595
A7	9	CBF7	0.619109	0.000627968
A7	10	CBF7	0.620493	0.001345
A7	11	CBF7	0.621561	0.00174637
A7	12	CBF7	0.622407	0.00192595
A7	13	CBF7	0.623444	0.00229526
A7	14	CBF7	0.624041	0.00222563
A7	15	CBF7	0.625754	0.0032724
A7	16	CBF7	0.626776	0.00362787
A7	17	CBF7	0.627041	0.00322565
A7	18	CBF7	0.626823	0.00234135
A7	19	CBF7	0.628059	0.00291056
A7	20	CBF7	0.627912	0.00209636
A7	21	CBF7	0.628302	0.0018196
A7	22	CBF7	0.627797	0.000648484
A7	23	CBF7	0.629464	0.00164864
A7	24	CBF7	0.629102	0.000619321
A7	25	CBF7	0.630504	0.0013546
A7	26	CBF7	0.631235	0.00141914
A7	27	CBF7	0.630551	6.81915e-05
A7	28	CBF7	0.631638	0.000488158
A7	29	CBF7	0.632319	0.000502514
A7	30	CBF7	0.630834	-0.0016488
A7	31	CBF7	0.631926	-0.00122359
A7	32	CBF7	0.632676	-0.00114075
A7	33	CBF7	0.633623	-0.000860558
A7	34	CBF7	0.634707	-0.000443035
A7	35	CBF7	0.634107	-0.00170994
A7	36	CBF7	0.634631	-0.00185282
A7	37	CBF7	0.634664	-0.00248601
A7	38	CBF7	0.636002	-0.00181457
A7	39	CBF7	0.636465	-0.00201831
A7	40	CBF7	0.636263	-0.00288723
A8	1	CBF8	0.617497	-0.000475719
A8	2	CBF8	0.618273	-0.00113551
A8	3	CBF8	0.620176	-0.000667514
A8	4	CBF8	0.621011	-0.00126835
A8	5	CBF8	0.623722	7.58077e-06
A8	6	CBF8	0.625611	0.000460314
A8	7	CBF8	0.626211	-0.000374711
A8	8	CBF8	0.629203	0.00118124
A8	9	CBF8	0.631012	0.00155518
A8	10	CBF8	0.631793	0.000900162
A8	11	CBF8	0.632965	0.000636805
A8	12	CBF8	0.634604	0.00084057
A8	13	CBF8	0.635377	0.000177683
A8	14	CBF8	0.63651	-0.000125013
A8	15	CBF8	0.636786	-0.00128417
A8	16	CBF8	0.637807	-0.00169868
A8	17	CBF8	0.640597	-0.000344011
A8	18	CBF8	0.639837	-0.00253951
A8	19	CBF8	0.642751	-0.00106128
A8	20	CBF8	0.645961	0.000713066
A8	21	CBF8	0.649574	0.00289064
A8	22	CBF8	0.656567	0.00844815
A8	23	CBF8	0.673268	0.0237135
A8	24	CBF8	0.702726	0.0517356
A8	25	CBF8	0.760772	0.108347
A8	26	CBF8	0.864297	0.210436
A8	27	CBF8	1.04166	0.386365
A8	28	CBF8	1.32146	0.664726
A8	29	CBF8	1.69582	1.03766
A8	30	CBF8	2.11808	1.45848
A8	31	CBF8	2.49158	1.83054
A8	32	CBF8	2.77804	2.11557
A8	33	CBF8	2.97093	2.30702
A8	34	CBF8	3.11998	2.45463
A8	35	CBF8	3.23548	2.56869
A8	36	CBF8	3.32288	2.65467
A8	37	CBF8	3.39035	2.72069
A8	38	CBF8	3.43947	2.76838
A8	39	CBF8	3.48202	2.80949
A8	40	CBF8	3.50956	2.8356
A9	1	CBF8	0.594409	-0.00334289
A9	2	CBF8	0.597112	-0.00144824
A9	3	CBF8	0.597041	-0.00232758
A9	4	CBF8	0.599178	-0.000999525
A9	5	CBF8	0.600324	-0.000661622
A9	6	CBF8	0.602666	0.000872546
A9	7	CBF8	0.603555	0.000953136
A9	8	CBF8	0.604483	0.00107247
A9	9	CBF8	0.60512	0.000901467
A9	10	CBF8	0.605935	0.000908087
A9	11	CBF8	0.606438	0.000602141
A9	12	CBF8	0.607714	0.00107028
A9	13	CBF8	0.608055	0.000602209
A9	14	CBF8	0.60912	0.000859526
A9	15	CBF8	0.608052	-0.00101665
A9	16	CBF8	0.609602	-0.000275278
A9	17	CBF8	0.609255	-0.00143119
A9	18	CBF8	0.610656	-0.000838295
A9	19	CBF8	0.611677	-0.000625681
A9	20	CBF8	0.611883	-0.00122745
A9	21	CBF8	0.615481	0.0015614
A9	22	CBF8	0.62295	0.00822198
A9	23	CBF8	0.636399	0.0208634
A9	24	CBF8	0.662073	0.0457291
A9	25	CBF8	0.711633	0.0944805
A9	26	CBF8	0.800765	0.182804
A9	27	CBF8	0.954738	0.335969
A9	28	CBF8	1.19379	0.574216
A9	29	CBF8	1.51218	0.891793
A9	30	CBF8	1.85606	1.23486
A9	31	CBF8	2.16941	1.54741
A9	32	CBF8	2.39682	1.774
A9	33	CBF8	2.56114	1.93752
A9	34	CBF8	2.69002	2.06559
A9	35	CBF8	2.79068	2.16545
A9	36	CBF8	2.86282	2.23677
A9	37	CBF8	2.92253	2.29568
A9	38	CBF8	2.96523	2.33757
A9	39	CBF8	3.00778	2.37931
A9	40	CBF8	3.02459	2.39531
A10	1	CBF8	0.594415	0.0030001
A10	2	CBF8	0.593838	0.00112792
A10	3	CBF8	0.592231	-0.00177512
A10	4	CBF8	0.594901	-0.000400928
A10	5	CBF8	0.596695	9.73114e-05
A10	6	CBF8	0.598143	0.000249665
A10	7	CBF8	0.599836	0.000647173
A10	8	CBF8	0.60187	0.00138568
A10	9	CBF8	0.603093	0.00131338
A10	10	CBF8	0.603419	0.000343619
A10	11	CBF8	0.605487	0.00111616
A10	12	CBF8	0.605865	0.000197953
A10	13	CBF8	0.60621	-0.000751962
A10	14	CBF8	0.606998	-0.00125955
A10	15	CBF8	0.609121	-0.000432651
A10	16	CBF8	0.610904	5.43824e-05
A10	17	CBF8	0.611865	-0.000279936
A10	18	CBF8	0.612571	-0.000869422
A10	19	CBF8	0.612789	-0.00194689
A10	20	CBF8	0.614718	-0.00131353
A10	21	CBF8	0.620952	0.00362466
A10	22	CBF8	0.626996	0.00837355
A10	23	CBF8	0.644297	0.0243785
A10	24	CBF8	0.672508	0.051294
A10	25	CBF8	0.724703	0.102194
A10	26	CBF8	0.82599	0.202185
A10	27	CBF8	0.997049	0.371948
A10	28	CBF8	1.26332	0.63692
A10	29	CBF8	1.62264	0.994947
A10	30	CBF8	2.01891	1.38993
A10	31	CBF8	2.37244	1.74216
A10	32	CBF8	2.63754	2.00596
A10	33	CBF8	2.82753	2.19466
A10	34	CBF8	2.97673	2.34256
A10	35	CBF8	3.08548	2.45001
A10	36	CBF8	3.17559	2.53883
A10	37	CBF8	3.24397	2.60591
A10	38	CBF8	3.29725	2.6579
A10	39	CBF8	3.33366	2.69301
A10	40	CBF8	3.3593	2.71735
A11	1
A11	2
A11	3
A11	4
A11	5
A11	6
A11	7
A11	8
A11	9
A11	10
A11	11
A11	12
A11	13
A11	14
A11	15
A11	16
A11	17
A11	18
A11	19
A11	20
A11	21
A11	22
A11	23
A11	24
A11	25
A11	26
A11	27
A11	28
A11	29
A11	30
A11	31
A11	32
A11	33
A11	34
A11	35
A11	36
A11	37
A11	38
A11	39
A11	40
A12	1
A12	2
A12	3
A12	4
A12	5
A12	6
A12	7
A12	8
A12	9
A12	10
A12	11
A12	12
A12	13
A12	14
A12	15
A12	16
A12	17
A12	18
A12	19
A12	20
A12	21
A12	22
A12	23
A12	24
A12	25
A12	26
A12	27
A12	28
A12	29
A12	30
A12	31
A12	32
A12	33
A12	34
A12	35
A12	36
A12	37
A12	38
A12	39
A12	40
B1	1
B1	2
B1	3
B1	4
B1	5
B1	6
B1	7
B1	8
B1	9
B1	10
B1	11
B1	12
B1	13
B1	14
B1	15
B1	16
B1	17
B1	18
B1	19
B1	20
B1	21
B1	22
B1	23
B1	24
B1	25
B1	26
B1	27
B1	28
B1	29
B1	30
B1	31
B1	32
B1	33
B1	34
B1	35
B1	36
B1	37
B1	38
B1	39
B1	40
B2	1	CBF7	0.739504	-0.0039185
B2	2	CBF7	0.739892	-0.00457559
B2	3	CBF7	0.743661	-0.00185119
B2	4	CBF7	0.742426	-0.00413226
B2	5	CBF7	0.745976	-0.00162643
B2	6	CBF7	0.747019	-0.001629
B2	7	CBF7	0.750289	0.000596154
B2	8	CBF7	0.75264	0.0019022
B2	9	CBF7	0.752457	0.000673449
B2	10	CBF7	0.755435	0.00260612
B2	11	CBF7	0.755981	0.00210776
B2	12	CBF7	0.75693	0.00201161
B2	13	CBF7	0.757513	0.00154913
B2	14	CBF7	0.757801	0.000791673
B2	15	CBF7	0.76148	0.00342583
B2	16	CBF7	0.759436	0.000336519
B2	17	CBF7	0.760399	0.000254795
B2	18	CBF7	0.761016	-0.000173531
B2	19	CBF7	0.761677	-0.00055745
B2	20	CBF7	0.763529	0.000249471
B2	21	CBF7	0.764555	0.000229795
B2	22	CBF7	0.763849	-0.00152092
B2	23	CBF7	0.763805	-0.00260966
B2	24	CBF7	0.764919	-0.00254083
B2	25	CBF7	0.766913	-0.00159187
B2	26	CBF7	0.768631	-0.000918937
B2	27	CBF7	0.770106	-0.00048979
B2	28	CBF7	0.771852	0.000211571
B2	29	CBF7	0.775381	0.00269577
B2	30	CBF7	0.78457	0.010839
B2	31	CBF7	0.800701	0.0259255
B2	32	CBF7	0.832533	0.0567116
B2	33	CBF7	0.887562	0.110696
B2	34	CBF7	0.986032	0.208121
B2	35	CBF7	1.14209	0.363133
B2	36	CBF7	1.3588	0.5788
B2	37	CBF7	1.60371	0.822664
B2	38	CBF7	1.81978	1.03769
B2	39	CBF7	1.97367	1.19054
B2	40	CBF7	2.09924	1.31506
B3	1	CBF7	0.564545	-0.00362899
B3	2	CBF7	0.564862	-0.00444964
B3	3	CBF7	0.567252	-0.00319748
B3	4	CBF7	0.569889	-0.00169813
B3	5	CBF7	0.572282	-0.000443288
B3	6	CBF7	0.572976	-0.000886818
B3	7	CBF7	0.576715	0.00171372
B3	8	CBF7	0.575663	-0.000476285
B3	9	CBF7	0.578087	0.000810388
B3	10	CBF7	0.57999	0.00157546
B3	11	CBF7	0.579961	0.000407855
B3	12	CBF7	0.58154	0.000848798
B3	13	CBF7	0.582594	0.000765459
B3	14	CBF7	0.584829	0.00186217
B3	15	CBF7	0.584215	0.000110142
B3	16	CBF7	0.586618	0.001375
B3	17	CBF7	0.58823	0.00184992
B3	18	CBF7	0.587722	0.000203924
B3	19	CBF7	0.589347	0.000690822
B3	20	CBF7	0.589808	1.39401e-05
B3	21	CBF7	0.591236	0.000304262
B3	22	CBF7	0.590873	-0.00119743
B3	23	CBF7	0.591342	-0.00186615
B3	24	CBF7	0.59353	-0.000816162
B3	25	CBF7	0.59456	-0.000924177
B3	26	CBF7	0.596013	-0.000608761
B3	27	CBF7	0.596881	-0.000878484
B3	28	CBF7	0.598645	-0.000252707
B3	29	CBF7	0.599446	-0.000589425
B3	30	CBF7	0.602477	0.00130343
B3	31	CBF7	0.606373	0.00406156
B3	32	CBF7	0.617196	0.0137466
B3	33	CBF7	0.637121	0.0325341
B3	34	CBF7	0.669099	0.0633743
B3	35	CBF7	0.731753	0.12489
B3	36	CBF7	0.842551	0.23455
B3	37	CBF7	1.0264	0.417257
B3	38	CBF7	1.29447	0.684196
B3	39	CBF7	1.61775	1.00634
B3	40	CBF7	1.92336	1.31081
B4	1	CBF7	0.606456	-0.00439933
B4	2	CBF7	0.608557	-0.00343795
B4	3	CBF7	0.611071	-0.00206333
B4	4	CBF7	0.612827	-0.00144689
B4	5	CBF7	0.615535	0.000121027
B4	6	CBF7	0.617665	0.00111179
B4	7	CBF7	0.617956	0.000263391
B4	8	CBF7	0.619458	0.000625206
B4	9	CBF7	0.619421	-0.000551256
B4	10	CBF7	0.622388	0.00127642
B4	11	CBF7	0.623132	0.000880476
B4	12	CBF7	0.624372	0.000980746
B4	13	CBF7	0.62652	0.00198867
B4	14	CBF7	0.626361	0.000690023
B4	15	CBF7	0.627984	0.00117343
B4	16	CBF7	0.627208	-0.000741831
B4	17	CBF7	0.630074	0.000983738
B4	18	CBF7	0.629029	-0.00120058
B4	19	CBF7	0.629276	-0.0020935
B4	20	CBF7	0.632078	-0.000431054
B4	21	CBF7	0.633778	0.000129304
B4	22	CBF7	0.633462	-0.00132599
B4	23	CBF7	0.634397	-0.00153107
B4	24	CBF7	0.636716	-0.000351841
B4	25	CBF7	0.636384	-0.00182353
B4	26	CBF7	0.639201	-0.000146534
B4	27	CBF7	0.641414	0.000927616
B4	28	CBF7	0.640632	-0.00099462
B4	29	CBF7	0.646316	0.00355019
B4	30	CBF7	0.65497	0.0110644
B4	31	CBF7	0.670537	0.0254912
B4	32	CBF7	0.69582	0.0496348
B4	33	CBF7	0.747225	0.0998997
B4	34	CBF7	0.838048	0.189583
B4	35	CBF7	0.995706	0.346102
B4	36	CBF7	1.24362	0.592878
B4	37	CBF7	1.56338	0.911499
B4	38	CBF7	1.90082	1.2478
B4	39	CBF7	2.1888	1.53464
B4	40	CBF7	2.39115	1.73584
B5	1	CBF7	0.628789	-0.00768737
B5	2	CBF7	0.631463	-0.00589564
B5	3	CBF7	0.635025	-0.0032152
B5	4	CBF7	0.636566	-0.00255685
B5	5	CBF7	0.638214	-0.00178984
B5	6	CBF7	0.64011	-0.000775891
B5	7	CBF7	0.641939	0.000170647
B5	8	CBF7	0.643801	0.0011514
B5	9	CBF7	0.645082	0.00154981
B5	10	CBF7	0.645792	0.00137787
B5	11	CBF7	0.647036	0.00174034
B5	12	CBF7	0.647943	0.00176563
B5	13	CBF7	0.647573	0.000513888
B5	14	CBF7	0.649487	0.00154584
B5	15	CBF7	0.649302	0.000478694
B5	16	CBF7	0.650338	0.000632907
B5	17	CBF7	0.652086	0.00149928
B5	18	CBF7	0.652972	0.00150287
B5	19	CBF7	0.652266	-8.49228e-05
B5	20	CBF7	0.654155	0.000922412
B5	21	CBF7	0.654252	0.000137018
B5	22	CBF7	0.655091	9.4476e-05
B5	23	CBF7	0.656247	0.000368852
B5	24	CBF7	0.655063	-0.00169733
B5	25	CBF7	0.65649	-0.00115211
B5	26	CBF7	0.656117	-0.00240659
B5	27	CBF7	0.658817	-0.00058881
B5	28	CBF7	0.657989	-0.00229879
B5	29	CBF7	0.659286	-0.00188405
B5	30	CBF7	0.661422	-0.000630068
B5	31	CBF7	0.666562	0.00362852
B5	32	CBF7	0.673677	0.00986145
B5	33	CBF7	0.688733	0.0240358
B5	34	CBF7	0.717204	0.0516248
B5	35	CBF7	0.771997	0.105536
B5	36	CBF7	0.867475	0.200132
B5	37	CBF7	1.02915	0.360927
B5	38	CBF7	1.27101	0.601899
B5	39	CBF7	1.56671	0.896718
B5	40	CBF7	1.87339	1.20252
B6	1	CBF7	0.587585	-0.0121186
B6	2	CBF7	0.592542	-0.00800622
B6	3	CBF7	0.59547	-0.00592305
B6	4	CBF7	0.597243	-0.00499424
B6	5	CBF7	0.601258	-0.00182352
B6	6	CBF7	0.601054	-0.00287239
B6	7	CBF7	0.603658	-0.00111311
B6	8	CBF7	0.606488	0.000872788
B6	9	CBF7	0.608254	0.00179349
B6	10	CBF7	0.607757	0.000451962
B6	11	CBF7	0.609693	0.00154361
B6	12	CBF7	0.610491	0.00149705
B6	13	CBF7	0.611232	0.00139333
B6	14	CBF7	0.61241	0.00172645
B6	15	CBF7	0.614308	0.00278055
B6	16	CBF7	0.613229	0.000856683
B6	17	CBF7	0.615128	0.00191042
B6	18	CBF7	0.61611	0.0020487
B6	19	CBF7	0.616001	0.00109436
B6	20	CBF7	0.616987	0.00123591
B6	21	CBF7	0.618292	0.00169641
B6	22	CBF7	0.619813	0.00237243
B6	23	CBF7	0.618996	0.000710767
B6	24	CBF7	0.62042	0.00129059
B6	25	CBF7	0.621147	0.00117346
B6	26	CBF7	0.619722	-0.00109659
B6	27	CBF7	0.622111	0.000448173
B6	28	CBF7	0.623953	0.00144475
B6	29	CBF7	0.623631	0.000278937
B6	30	CBF7	0.62498	0.000783124
B6	31	CBF7	0.625276	0.000233978
B6	32	CBF7	0.624847	-0.00103972
B6	33	CBF7	0.627011	0.000279676
B6	34	CBF7	0.626439	-0.00113672
B6	35	CBF7	0.626713	-0.0017075
B6	36	CBF7	0.628069	-0.00119527
B6	37	CBF7	0.62762	-0.00248911
B6	38	CBF7	0.627462	-0.00349233
B6	39	CBF7	0.630764	-0.00103406
B6	40	CBF7	0.631381	-0.00126236
B7	1	CBF7	0.610017	-0.0111153
B7	2	CBF7	0.613826	-0.00816619
B7	3	CBF7	0.617582	-0.00527003
B7	4	CBF7	0.621095	-0.00261659
B7	5	CBF7	0.622538	-0.00203381
B7	6	CBF7	0.623834	-0.00159772
B7	7	CBF7	0.625946	-0.000345701
B7	8	CBF7	0.626475	-0.000676066
B7	9	CBF7	0.628268	0.000257367
B7	10	CBF7	0.62782	-0.00105057
B7	11	CBF7	0.632486	0.00275562
B7	12	CBF7	0.632433	0.00184328
B7	13	CBF7	0.632863	0.0014132
B7	14	CBF7	0.633519	0.00120973
B7	15	CBF7	0.635349	0.00217958
B7	16	CBF7	0.635446	0.00141696
B7	17	CBF7	0.636505	0.00161642
B7	18	CBF7	0.637527	0.00177845
B7	19	CBF7	0.637442	0.000832966
B7	20	CBF7	0.638832	0.00136371
B7	21	CBF7	0.639569	0.00124041
B7	22	CBF7	0.639738	0.000550034
B7	23	CBF7	0.640211	0.000162926
B7	24	CBF7	0.640833	-7.39195e-05
B7	25	CBF7	0.643641	0.00187398
B7	26	CBF7	0.643771	0.00114355
B7	27	CBF7	0.643712	0.000225665
B7	28	CBF7	0.645865	0.00151869
B7	29	CBF7	0.644493	-0.00071324
B7	30	CBF7	0.646579	0.000513268
B7	31	CBF7	0.647265	0.000339187
B7	32	CBF7	0.6469	-0.000885307
B7	33	CBF7	0.647862	-0.000783181
B7	34	CBF7	0.647807	-0.00169773
B7	35	CBF7	0.650544	0.000179243
B7	36	CBF7	0.649492	-0.00173303
B7	37	CBF7	0.649299	-0.00278503
B7	38	CBF7	0.652141	-0.000803567
B7	39	CBF7	0.652455	-0.00134875
B7	40	CBF7	0.654042	-0.000622024
B8	1	CBF8	0.654236	-0.00283764
B8	2	CBF8	0.657069	-0.00130181
B8	3	CBF8	0.658349	-0.00132011
B8	4	CBF8	0.661336	0.000368426
B8	5	CBF8	0.663332	0.00106663
B8	6	CBF8	0.663668	0.000104668
B8	7	CBF8	0.664526	-0.000334681
B8	8	CBF8	0.667214	0.00105547
B8	9	CBF8	0.668338	0.000881128
B8	10	CBF8	0.668753	-1.3822e-06
B8	11	CBF8	0.670249	0.000196383
B8	12	CBF8	0.671459	0.000108105
B8	13	CBF8	0.672613	-3.59038e-05
B8	14	CBF8	0.672804	-0.00114253
B8	15	CBF8	0.674921	-0.000323801
B8	16	CBF8	0.674923	-0.00162003
B8	17	CBF8	0.676202	-0.00163845
B8	18	CBF8	0.678284	-0.00085471
B8	19	CBF8	0.680723	0.000286894
B8	20	CBF8	0.684938	0.00320388
B8	21	CBF8	0.69092	0.00788737
B8	22	CBF8	0.705007	0.0206766
B8	23	CBF8	0.729991	0.0443631
B8	24	CBF8	0.77791	0.090984
B8	25	CBF8	0.868108	0.179884
B8	26	CBF8	1.02722	0.337699
B8	27	CBF8	1.27792	0.587103
B8	28	CBF8	1.6243	0.932182
B8	29	CBF8	2.02967	1.33625
B8	30	CBF8	2.39817	1.70346
B8	31	CBF8	2.68419	1.98818
B8	32	CBF8	2.88333	2.18602
B8	33	CBF8	3.03593	2.33732
B8	34	CBF8	3.14268	2.44277
B8	35	CBF8	3.23417	2.53297
B8	36	CBF8	3.30921	2.60671
B8	37	CBF8	3.3562	2.65241
B8	38	CBF8	3.39678	2.69168
B8	39	CBF8	3.41846	2.71206
B8	40	CBF8	3.43511	2.72741
B9	1	CBF8	0.618486	0.00020869
B9	2	CBF8	0.619272	-0.000469112
B9	3	CBF8	0.619941	-0.00126362
B9	4	CBF8	0.622121	-0.000546793
B9	5	CBF8	0.624423	0.000292224
B9	6	CBF8	0.626265	0.000670319
B9	7	CBF8	0.628901	0.00184276
B9	8	CBF8	0.627743	-0.000778686
B9	9	CBF8	0.629597	-0.000388552
B9	10	CBF8	0.633204	0.00175551
B9	11	CBF8	0.633262	0.000349815
B9	12	CBF8	0.635201	0.000825542
B9	13	CBF8	0.636085	0.000246207
B9	14	CBF8	0.636586	-0.000716923
B9	15	CBF8	0.638066	-0.000700569
B9	16	CBF8	0.637753	-0.00247688
B9	17	CBF8	0.640624	-0.00106966
B9	18	CBF8	0.642195	-0.000961631
B9	19	CBF8	0.644558	-6.22939e-05
B9	20	CBF8	0.649067	0.00298323
B9	21	CBF8	0.655126	0.00757865
B9	22	CBF8	0.669691	0.0206798
B9	23	CBF8	0.697811	0.0473367
B9	24	CBF8	0.747067	0.0951296
B9	25	CBF8	0.841287	0.187885
B9	26	CBF8	1.0037	0.348836
B9	27	CBF8	1.26024	0.603914
B9	28	CBF8	1.6155	0.957712
B9	29	CBF8	2.02442	1.36516
B9	30	CBF8	2.39444	1.73372
B9	31	CBF8	2.67718	2.015
B9	32	CBF8	2.87893	2.21528
B9	33	CBF8	3.0278	2.36269
B9	34	CBF8	3.13991	2.47333
B9	35	CBF8	3.23274	2.5647
B9	36	CBF8	3.29793	2.62843
B9	37	CBF8	3.35677	2.68581
B9	38	CBF8	3.38947	2.71704
B9	39	CBF8	3.42108	2.74719
B9	40	CBF8	3.43473	2.75937
B10	1	CBF8	0.58978	-0.00204503
B10	2	CBF8	0.594051	0.000807521
B10	3	CBF8	0.594372	-0.000291301
B10	4	CBF8	0.596484	0.000401712
B10	5	CBF8	0.597768	0.000266816
B10	6	CBF8	0.599189	0.000268713
B10	7	CBF8	0.600517	0.000176851
B10	8	CBF8	0.60241	0.000650996
B10	9	CBF8	0.603627	0.000449104
B10	10	CBF8	0.603707	-0.000890044
B10	11	CBF8	0.606624	0.000607393
B10	12	CBF8	0.607398	-3.748e-05
B10	13	CBF8	0.607924	-0.000930726
B10	14	CBF8	0.609812	-0.000461946
B10	15	CBF8	0.611655	-3.8346e-05
B10	16	CBF8	0.611222	-0.00189063
B10	17	CBF8	0.613839	-0.000693184
B10	18	CBF8	0.614971	-0.000980369
B10	19	CBF8	0.617895	0.000524399
B10	20	CBF8	0.621658	0.00286804
B10	21	CBF8	0.629374	0.00916508
B10	22	CBF8	0.64402	0.0223921
B10	23	CBF8	0.672019	0.048972
B10	24	CBF8	0.721154	0.0966876
B10	25	CBF8	0.815794	0.189908
B10	26	CBF8	0.978803	0.351499
B10	27	CBF8	1.23676	0.608034
B10	28	CBF8	1.58891	0.95877
B10	29	CBF8	1.98991	1.35834
B10	30	CBF8	2.35044	1.71746
B10	31	CBF8	2.63218	1.99778
B10	32	CBF8	2.83274	2.19692
B10	33	CBF8	2.98786	2.35062
B10	34	CBF8	3.10247	2.46381
B10	35	CBF8	3.19267	2.5526
B10	36	CBF8	3.26659	2.6251
B10	37	CBF8	3.31688	2.67396
B10	38	CBF8	3.36514	2.72081
B10	39	CBF8	3.40797	2.76221
B10	40	CBF8	3.4204	2.77323
B11	1
B11	2
B11	3
B11	4
B11	5
B11	6
B11	7
B11	8
B11	9
B11	10
B11	11
B11	12
B11	13
B11	14
B11	15
B11	16
B11	17
B11	18
B11	19
B11	20
B11	21
B11	22
B11	23
B11	24
B11	25
B11	26
B11	27
B11	28
B11	29
B11	30
B11	31
B11	32
B11	33
B11	34
B11	35
B11	36
B11	37
B11	38
B11	39
B11	40
B12	1
B12	2
B12	3
B12	4
B12	5
B12	6
B12	7
B12	8
B12	9
B12	10
B12	11
B12	12
B12	13
B12	14
B12	15
B12	16
B12	17
B12	18
B12	19
B12	20
B12	21
B12	22
B12	23
B12	24
B12	25
B12	26
B12	27
B12	28
B12	29
B12	30
B12	31
B12	32
B12	33
B12	34
B12	35
B12	36
B12	37
B12	38
B12	39
B12	40
C1	1
C1	2
C1	3
C1	4
C1	5
C1	6
C1	7
C1	8
C1	9
C1	10
C1	11
C1	12
C1	13
C1	14
C1	15
C1	16
C1	17
C1	18
C1	19
C1	20
C1	21
C1	22
C1	23
C1	24
C1	25
C1	26
C1	27
C1	28
C1	29
C1	30
C1	31
C1	32
C1	33
C1	34
C1	35
C1	36
C1	37
C1	38
C1	39
C1	40
C2	1	CBF7	0.680997	-0.00570044
C2	2	CBF7	0.682839	-0.00485278
C2	3	CBF7	0.684756	-0.00392919
C2	4	CBF7	0.687694	-0.00198416
C2	5	CBF7	0.688608	-0.00206455
C2	6	CBF7	0.690483	-0.00118328
C2	7	CBF7	0.691754	-0.000905388
C2	8	CBF7	0.694134	0.000481329
C2	9	CBF7	0.695695	0.00104842
C2	10	CBF7	0.698216	0.00257593
C2	11	CBF7	0.697403	0.000769624
C2	12	CBF7	0.699094	0.00146678
C2	13	CBF7	0.701199	0.00257824
C2	14	CBF7	0.701968	0.0023536
C2	15	CBF7	0.702459	0.00185074
C2	16	CBF7	0.703153	0.00155154
C2	17	CBF7	0.703592	0.000996214
C2	18	CBF7	0.70446	0.000870941
C2	19	CBF7	0.705271	0.000688566
C2	20	CBF7	0.70666	0.0010843
C2	21	CBF7	0.707175	0.000605627
C2	22	CBF7	0.706523	-0.00104022
C2	23	CBF7	0.707776	-0.000780507
C2	24	CBF7	0.708179	-0.00137177
C2	25	CBF7	0.709007	-0.0015374
C2	26	CBF7	0.709417	-0.00212079
C2	27	CBF7	0.710702	-0.00182967
C2	28	CBF7	0.712498	-0.0010269
C2	29	CBF7	0.71537	0.000851978
C2	30	CBF7	0.718717	0.00320453
C2	31	CBF7	0.729473	0.0129672
C2	32	CBF7	0.747016	0.0295171
C2	33	CBF7	0.780161	0.0616681
C2	34	CBF7	0.840147	0.120661
C2	35	CBF7	0.946111	0.225631
C2	36	CBF7	1.10839	0.386912
C2	37	CBF7	1.32921	0.606744
C2	38	CBF7	1.5713	0.847838
C2	39	CBF7	1.78246	1.058
C2	40	CBF7	1.94322	1.21777
C3	1	CBF7	0.558138	-0.00398228
C3	2	CBF7	0.561241	-0.00202326
C3	3	CBF7	0.562611	-0.00179809
C3	4	CBF7	0.565269	-0.000284495
C3	5	CBF7	0.566068	-0.000629674
C3	6	CBF7	0.567702	-0.00014021
C3	7	CBF7	0.569427	0.000440271
C3	8	CBF7	0.57133	0.00119879
C3	9	CBF7	0.573686	0.00240995
C3	10	CBF7	0.573574	0.00115389
C3	11	CBF7	0.574918	0.00135314
C3	12	CBF7	0.57539	0.000680611
C3	13	CBF7	0.57599	0.00013665
C3	14	CBF7	0.577711	0.000713018
C3	15	CBF7	0.577495	-0.000647765
C3	16	CBF7	0.579556	0.000268409
C3	17	CBF7	0.580877	0.000445307
C3	18	CBF7	0.580753	-0.000823268
C3	19	CBF7	0.582213	-0.000507969
C3	20	CBF7	0.58267	-0.00119522
C3	21	CBF7	0.58301	-0.00199971
C3	22	CBF7	0.584172	-0.0019819
C3	23	CBF7	0.58482	-0.00247889
C3	24	CBF7	0.585678	-0.00276536
C3	25	CBF7	0.588554	-0.00103374
C3	26	CBF7	0.589631	-0.0011008
C3	27	CBF7	0.592834	0.000957399
C3	28	CBF7	0.600651	0.00762965
C3	29	CBF7	0.609862	0.0156966
C3	30	CBF7	0.629803	0.0344932
C3	31	CBF7	0.667849	0.0713946
C3	32	CBF7	0.73624	0.138641
C3	33	CBF7	0.85762	0.258876
C3	34	CBF7	1.05072	0.450833
C3	35	CBF7	1.31798	0.716949
C3	36	CBF7	1.60593	1.00376
C3	37	CBF7	1.84894	1.24562
C3	38	CBF7	2.02675	1.42228
C3	39	CBF7	2.18442	1.57881
C3	40	CBF7	2.32161	1.71485
C4	1	CBF7	0.59142	-0.00735407
C4	2	CBF7	0.594741	-0.00520654
C4	3	CBF7	0.598715	-0.00240635
C4	4	CBF7	0.600037	-0.00225767
C4	5	CBF7	0.602305	-0.00116288
C4	6	CBF7	0.604197	-0.000443304
C4	7	CBF7	0.606102	0.000288133
C4	8	CBF7	0.609117	0.00213006
C4	9	CBF7	0.608199	3.85058e-05
C4	10	CBF7	0.610084	0.000750333
C4	11	CBF7	0.613244	0.00273692
C4	12	CBF7	0.613469	0.00178846
C4	13	CBF7	0.615841	0.0029872
C4	14	CBF7	0.614391	0.000364029
C4	15	CBF7	0.615642	0.000441186
C4	16	CBF7	0.616591	0.000217757
C4	17	CBF7	0.617516	-3.05873e-05
C4	18	CBF7	0.619536	0.000815589
C4	19	CBF7	0.620688	0.00079404
C4	20	CBF7	0.619428	-0.00163899
C4	21	CBF7	0.62157	-0.00067027
C4	22	CBF7	0.620271	-0.00314193
C4	23	CBF7	0.622742	-0.00184419
C4	24	CBF7	0.624434	-0.00132643
C4	25	CBF7	0.625215	-0.00171842
C4	26	CBF7	0.625965	-0.00214105
C4	27	CBF7	0.629489	0.000209546
C4	28	CBF7	0.635673	0.0052203
C4	29	CBF7	0.643838	0.0122118
C4	30	CBF7	0.661184	0.028384
C4	31	CBF7	0.693759	0.0597861
C4	32	CBF7	0.750949	0.115803
C4	33	CBF7	0.857778	0.221459
C4	34	CBF7	1.02809	0.390599
C4	35	CBF7	1.27429	0.635621
C4	36	CBF7	1.56095	0.921108
C4	37	CBF7	1.83473	1.19371
C4	38	CBF7	2.03901	1.39683
C4	39	CBF7	2.18873	1.54537
C4	40	CBF7	2.3138	1.66927
C5	1	CBF7	0.638055	-0.0107135
C5	2	CBF7	0.642629	-0.00688739
C5	3	CBF7	0.645141	-0.00512369
C5	4	CBF7	0.647386	-0.00362785
C5	5	CBF7	0.648534	-0.0032276
C5	6	CBF7	0.649992	-0.00251871
C5	7	CBF7	0.651012	-0.00224685
C5	8	CBF7	0.65419	0.000182996
C5	9	CBF7	0.654344	-0.000411913
C5	10	CBF7	0.65599	0.000485976
C5	11	CBF7	0.657225	0.000972712
C5	12	CBF7	0.658786	0.00178465
C5	13	CBF7	0.659894	0.00214419
C5	14	CBF7	0.659869	0.00137094
C5	15	CBF7	0.662252	0.00300561
C5	16	CBF7	0.661844	0.0018488
C5	17	CBF7	0.662064	0.00132107
C5	18	CBF7	0.663881	0.00238871
C5	19	CBF7	0.664547	0.00230694
C5	20	CBF7	0.665278	0.00228918
C5	21	CBF7	0.665089	0.00135196
C5	22	CBF7	0.665757	0.00127138
C5	23	CBF7	0.666444	0.00120976
C5	24	CBF7	0.66904	0.00305745
C5	25	CBF7	0.667738	0.00100717
C5	26	CBF7	0.669212	0.00173274
C5	27	CBF7	0.668454	0.000225584
C5	28	CBF7	0.669287	0.000310644
C5	29	CBF7	0.669596	-0.000128697
C5	30	CBF7	0.670753	0.000279302
C5	31	CBF7	0.671413	0.000191449
C5	32	CBF7	0.67092	-0.00105053
C5	33	CBF7	0.671957	-0.000761739
C5	34	CBF7	0.673307	-0.000160204
C5	35	CBF7	0.671755	-0.00246046
C5	36	CBF7	0.672254	-0.00271032
C5	37	CBF7	0.673883	-0.00182942
C5	38	CBF7	0.673955	-0.00250551
C5	39	CBF7	0.675234	-0.00197574
C5	40	CBF7	0.673955	-0.00400295
C6	1	CBF7	0.555999	-0.00879302
C6	2	CBF7	0.561526	-0.00430856
C6	3	CBF7	0.563124	-0.0037533
C6	4	CBF7	0.56616	-0.00175871
C6	5	CBF7	0.567927	-0.00103423
C6	6	CBF7	0.569646	-0.000357616
C6	7	CBF7	0.571016	-3.01658e-05
C6	8	CBF7	0.572871	0.000782884
C6	9	CBF7	0.575077	0.00194629
C6	10	CBF7	0.574665	0.000492514
C6	11	CBF7	0.576305	0.00108991
C6	12	CBF7	0.578638	0.00238034
C6	13	CBF7	0.579267	0.00196786
C6	14	CBF7	0.58034	0.001998
C6	15	CBF7	0.580796	0.00141189
C6	16	CBF7	0.581244	0.000817851
C6	17	CBF7	0.582128	0.000659523
C6	18	CBF7	0.583051	0.000539999
C6	19	CBF7	0.583494	-5.90457e-05
C6	20	CBF7	0.584874	0.000278359
C6	21	CBF7	0.585601	-3.64905e-05
C6	22	CBF7	0.58567	-0.00100967
C6	23	CBF7	0.586282	-0.00144033
C6	24	CBF7	0.587021	-0.00174326
C6	25	CBF7	0.587483	-0.00232329
C6	26	CBF7	0.588551	-0.00229828
C6	27	CBF7	0.590012	-0.00187909
C6	28	CBF7	0.591482	-0.00145109
C6	29	CBF7	0.592794	-0.00118128
C6	30	CBF7	0.595946	0.00092847
C6	31	CBF7	0.601122	0.00506198
C6	32	CBF7	0.60846	0.0113573
C6	33	CBF7	0.625178	0.0270337
C6	34	CBF7	0.65569	0.0565025
C6	35	CBF7	0.713401	0.113172
C6	36	CBF7	0.813831	0.212559
C6	37	CBF7	0.981367	0.379054
C6	38	CBF7	1.22314	0.61978
C6	39	CBF7	1.51563	0.91123
C6	40	CBF7	1.79247	1.18702
C7	1	CBF7	0.612722	-0.0107106
C7	2	CBF7	0.617421	-0.00642158
C7	3	CBF7	0.620637	-0.00361579
C7	4	CBF7	0.620782	-0.00388036
C7	5	CBF7	0.62293	-0.00214227
C7	6	CBF7	0.624226	-0.00125552
C7	7	CBF7	0.623467	-0.00242441
C7	8	CBF7	0.626188	-0.000113464
C7	9	CBF7	0.627061	0.000350037
C7	10	CBF7	0.627491	0.00037008
C7	11	CBF7	0.628936	0.00140525
C7	12	CBF7	0.629511	0.00157097
C7	13	CBF7	0.629987	0.00163714
C7	14	CBF7	0.628872	0.000111816
C7	15	CBF7	0.631452	0.00228239
C7	16	CBF7	0.631817	0.00223806
C7	17	CBF7	0.632049	0.00205992
C7	18	CBF7	0.632218	0.00181901
C7	19	CBF7	0.63311	0.00230105
C7	20	CBF7	0.633108	0.00188998
C7	21	CBF7	0.632267	0.000638532
C7	22	CBF7	0.632271	0.000232997
C7	23	CBF7	0.633095	0.000647086
C7	24	CBF7	0.633852	0.00099418
C7	25	CBF7	0.634247	0.00097983
C7	26	CBF7	0.63501	0.00133336
C7	27	CBF7	0.63362	-0.000467101
C7	28	CBF7	0.633583	-0.000913286
C7	29	CBF7	0.635413	0.000506513
C7	30	CBF7	0.635061	-0.00025504
C7	31	CBF7	0.635957	0.000231111
C7	32	CBF7	0.635836	-0.000299057
C7	33	CBF7	0.636178	-0.000367229
C7	34	CBF7	0.636543	-0.000412156
C7	35	CBF7	0.636121	-0.00124416
C7	36	CBF7	0.636395	-0.00138004
C7	37	CBF7	0.637389	-0.00079495
C7	38	CBF7	0.63621	-0.00238459
C7	39	CBF7	0.637354	-0.00164989
C7	40	CBF7	0.638683	-0.000731007
C8	1	CBF8	0.634831	-0.00201625
C8	2	CBF8	0.635926	-0.00176946
C8	3	CBF8	0.636465	-0.00207919
C8	4	CBF8	0.637491	-0.00190082
C8	5	CBF8	0.638391	-0.00184935
C8	6	CBF8	0.641487	0.000399444
C8	7	CBF8	0.643553	0.00161672
C8	8	CBF8	0.643317	0.000532962
C8	9	CBF8	0.6453	0.00166816
C8	10	CBF8	0.645007	0.000526529
C8	11	CBF8	0.646097	0.000768794
C8	12	CBF8	0.647785	0.00160818
C8	13	CBF8	0.647809	0.000783997
C8	14	CBF8	0.648809	0.000936557
C8	15	CBF8	0.649528	0.000806948
C8	16	CBF8	0.65135	0.00178098
C8	17	CBF8	0.65025	-0.00016669
C8	18	CBF8	0.649764	-0.00150055
C8	19	CBF8	0.652262	0.00014892
C8	20	CBF8	0.650888	-0.00207353
C8	21	CBF8	0.652573	-0.00123635
C8	22	CBF8	0.651639	-0.00301784
C8	23	CBF8	0.655399	-0.000106359
C8	24	CBF8	0.658706	0.00235248
C8	25	CBF8	0.666231	0.00902984
C8	26	CBF8	0.681478	0.0234282
C8	27	CBF8	0.70869	0.049792
C8	28	CBF8	0.76213	0.102384
C8	29	CBF8	0.858291	0.197698
C8	30	CBF8	1.0234	0.361955
C8	31	CBF8	1.2779	0.615606
C8	32	CBF8	1.61201	0.948877
C8	33	CBF8	1.9668	1.30281
C8	34	CBF8	2.28056	1.61573
C8	35	CBF8	2.5163	1.85061
C8	36	CBF8	2.67943	2.0129
C8	37	CBF8	2.80069	2.13331
C8	38	CBF8	2.88854	2.22031
C8	39	CBF8	2.96452	2.29544
C8	40	CBF8	3.01496	2.34504
C9	1	CBF8	0.629818	-0.0024078
C9	2	CBF8	0.632061	-0.00128041
C9	3	CBF8	0.631885	-0.00257189
C9	4	CBF8	0.633163	-0.00240908
C9	5	CBF8	0.635742	-0.000945397
C9	6	CBF8	0.637081	-0.000722266
C9	7	CBF8	0.640512	0.00159335
C9	8	CBF8	0.640977	0.000943149
C9	9	CBF8	0.642469	0.00131988
C9	10	CBF8	0.643445	0.00118008
C9	11	CBF8	0.645437	0.00205624
C9	12	CBF8	0.646145	0.00164905
C9	13	CBF8	0.647879	0.00226802
C9	14	CBF8	0.648173	0.00144634
C9	15	CBF8	0.647955	0.000112476
C9	16	CBF8	0.648406	-0.000551489
C9	17	CBF8	0.649212	-0.000860687
C9	18	CBF8	0.650102	-0.00108614
C9	19	CBF8	0.651336	-0.000967675
C9	20	CBF8	0.651495	-0.00192484
C9	21	CBF8	0.653669	-0.00086569
C9	22	CBF8	0.655117	-0.000533721
C9	23	CBF8	0.657636	0.000870297
C9	24	CBF8	0.663332	0.00545053
C9	25	CBF8	0.673558	0.0145611
C9	26	CBF8	0.693639	0.0335261
C9	27	CBF8	0.730626	0.0693981
C9	28	CBF8	0.800006	0.137663
C9	29	CBF8	0.923808	0.260349
C9	30	CBF8	1.12938	0.464803
C9	31	CBF8	1.43198	0.766288
C9	32	CBF8	1.80209	1.13528
C9	33	CBF8	2.17382	1.5059
C9	34	CBF8	2.48093	1.81189
C9	35	CBF8	2.70292	2.03277
C9	36	CBF8	2.86061	2.18934
C9	37	CBF8	2.99391	2.32152
C9	38	CBF8	3.08958	2.41608
C9	39	CBF8	3.1686	2.49399
C9	40	CBF8	3.2319	2.55617
C10	1	CBF8	0.599687	-0.0027921
C10	2	CBF8	0.60218	-0.00156817
C10	3	CBF8	0.603064	-0.00195339
C10	4	CBF8	0.605424	-0.000862138
C10	5	CBF8	0.606786	-0.000768192
C10	6	CBF8	0.608475	-0.000348208
C10	7	CBF8	0.612155	0.00206269
C10	8	CBF8	0.611805	0.000444492
C10	9	CBF8	0.613658	0.00102857
C10	10	CBF8	0.614879	0.000980654
C10	11	CBF8	0.616127	0.000959444
C10	12	CBF8	0.616221	-0.000214997
C10	13	CBF8	0.618149	0.00044412
C10	14	CBF8	0.621127	0.00215365
C10	15	CBF8	0.619322	-0.000920868
C10	16	CBF8	0.621033	-0.000478175
C10	17	CBF8	0.622348	-0.000431675
C10	18	CBF8	0.623249	-0.000799426
C10	19	CBF8	0.625067	-0.000250399
C10	20	CBF8	0.625497	-0.00108986
C10	21	CBF8	0.62692	-0.000935059
C10	22	CBF8	0.627971	-0.0011532
C10	23	CBF8	0.632525	0.00213198
C10	24	CBF8	0.636751	0.00508921
C10	25	CBF8	0.647953	0.0150226
C10	26	CBF8	0.669742	0.0355428
C10	27	CBF8	0.709379	0.0739113
C10	28	CBF8	0.781004	0.144267
C10	29	CBF8	0.911401	0.273395
C10	30	CBF8	1.12805	0.488779
C10	31	CBF8	1.44579	0.80525
C10	32	CBF8	1.8322	1.19039
C10	33	CBF8	2.21981	1.57672
C10	34	CBF8	2.52949	1.88514
C10	35	CBF8	2.75916	2.11354
C10	36	CBF8	2.93786	2.29097
C10	37	CBF8	3.07478	2.42663
C10	38	CBF8	3.18384	2.53441
C10	39	CBF8	3.26334	2.61264
C10	40	CBF8	3.33473	2.68277
C11	1
C11	2
C11	3
C11	4
C11	5
C11	6
C11	7
C11	8
C11	9
C11	10
C11	11
C11	12
C11	13
C11	14
C11	15
C11	16
C11	17
C11	18
C11	19
C11	20
C11	21
C11	22
C11	23
C11	24
C11	25
C11	26
C11	27
C11	28
C11	29
C11	30
C11	31
C11	32
C11	33
C11	34
C11	35
C11	36
C11	37
C11	38
C11	39
C11	40
C12	1
C12	2
C12	3
C12	4
C12	5
C12	6
C12	7
C12	8
C12	9
C12	10
C12	11
C12	12
C12	13
C12	14
C12	15
C12	16
C12	17
C12	18
C12	19
C12	20
C12	21
C12	22
C12	23
C12	24
C12	25
C12	26
C12	27
C12	28
C12	29
C12	30
C12	31
C12	32
C12	33
C12	34
C12	35
C12	36
C12	37
C12	38
C12	39
C12	40
D1	1
D1	2
D1	3
D1	4
D1	5
D1	6
D1	7
D1	8
D1	9
D1	10
D1	11
D1	12
D1	13
D1	14
D1	15
D1	16
D1	17
D1	18
D1	19
D1	20
D1	21
D1	22
D1	23
D1	24
D1	25
D1	26
D1	27
D1	28
D1	29
D1	30
D1	31
D1	32
D1	33
D1	34
D1	35
D1	36
D1	37
D1	38
D1	39
D1	40
D2	1	CBF7	0.729268	-0.00156078
D2	2	CBF7	0.731651	-0.000312366
D2	3	CBF7	0.731481	-0.00161759
D2	4	CBF7	0.733742	-0.000492551
D2	5	CBF7	0.735119	-0.000250795
D2	6	CBF7	0.73509	-0.00141458
D2	7	CBF7	0.737769	0.000129065
D2	8	CBF7	0.739184	0.000408908
D2	9	CBF7	0.741574	0.00166311
D2	10	CBF7	0.741853	0.000807245
D2	11	CBF7	0.742932	0.000751157
D2	12	CBF7	0.744803	0.0014868
D2	13	CBF7	0.746136	0.00168486
D2	14	CBF7	0.746231	0.000644404
D2	15	CBF7	0.746492	-0.0002294
D2	16	CBF7	0.747891	3.39325e-05
D2	17	CBF7	0.749472	0.000480192
D2	18	CBF7	0.749674	-0.000453157
D2	19	CBF7	0.750394	-0.000868781
D2	20	CBF7	0.750338	-0.00205956
D2	21	CBF7	0.752253	-0.00128041
D2	22	CBF7	0.753092	-0.00157599
D2	23	CBF7	0.755427	-0.000377163
D2	24	CBF7	0.757052	0.000112608
D2	25	CBF7	0.760492	0.0024177
D2	26	CBF7	0.768295	0.00908513
D2	27	CBF7	0.781437	0.0210925
D2	28	CBF7	0.806689	0.0452091
D2	29	CBF7	0.854018	0.0914029
D2	30	CBF7	0.937314	0.173564
D2	31	CBF7	1.07974	0.314856
D2	32	CBF7	1.29224	0.526221
D2	33	CBF7	1.56802	0.800865
D2	34	CBF7	1.85111	1.08282
D2	35	CBF7	2.07795	1.30852
D2	36	CBF7	2.24273	1.47217
D2	37	CBF7	2.37451	1.60282
D2	38	CBF7	2.47871	1.70588
D2	39	CBF7	2.56865	1.79468
D2	40	CBF7	2.64384	1.86874
D3	1	CBF7	0.589851	-0.00363812
D3	2	CBF7	0.590937	-0.00378453
D3	3	CBF7	0.593073	-0.00288107
D3	4	CBF7	0.595601	-0.00158553
D3	5	CBF7	0.598271	-0.00014747
D3	6	CBF7	0.600073	0.00042185
D3	7	CBF7	0.602108	0.00122446
D3	8	CBF7	0.60346	0.00134389
D3	9	CBF7	0.604265	0.000916318
D3	10	CBF7	0.604913	0.000332109
D3	11	CBF7	0.607004	0.00119081
D3	12	CBF7	0.608425	0.00137979
D3	13	CBF7	0.608703	0.000425378
D3	14	CBF7	0.610906	0.00139554
D3	15	CBF7	0.610779	3.62308e-05
D3	16	CBF7	0.612152	0.000177351
D3	17	CBF7	0.612512	-0.000694868
D3	18	CBF7	0.613479	-0.000960371
D3	19	CBF7	0.614245	-0.00142704
D3	20	CBF7	0.616326	-0.000578174
D3	21	CBF7	0.616977	-0.00115911
D3	22	CBF7	0.618662	-0.00070679
D3	23	CBF7	0.619858	-0.000743053
D3	24	CBF7	0.623873	0.00203974
D3	25	CBF7	0.630746	0.00767963
D3	26	CBF7	0.640994	0.0166956
D3	27	CBF7	0.660201	0.0346699
D3	28	CBF7	0.695531	0.0687684
D3	29	CBF7	0.763068	0.135072
D3	30	CBF7	0.883938	0.25471
D3	31	CBF7	1.08217	0.451711
D3	32	CBF7	1.37253	0.740838
D3	33	CBF7	1.72661	1.09368
D3	34	CBF7	2.06655	1.43239
D3	35	CBF7	2.33149	1.6961
D3	36	CBF7	2.51941	1.88279
D3	37	CBF7	2.6692	2.03134
D3	38	CBF7	2.79163	2.15254
D3	39	CBF7	2.88596	2.24564
D3	40	CBF7	2.96148	2.31992
D4	1	CBF7	0.638611	-0.00503924
D4	2	CBF7	0.642563	-0.00237635
D4	3	CBF7	0.644893	-0.00133537
D4	4	CBF7	0.646756	-0.000760316
D4	5	CBF7	0.647948	-0.000857603
D4	6	CBF7	0.650167	7.25148e-05
D4	7	CBF7	0.651784	0.000400864
D4	8	CBF7	0.652102	-0.000570048
D4	9	CBF7	0.654949	0.000988183
D4	10	CBF7	0.657259	0.00200968
D4	11	CBF7	0.658513	0.0019742
D4	12	CBF7	0.658795	0.000967224
D4	13	CBF7	0.660456	0.00133944
D4	14	CBF7	0.660906	0.000500733
D4	15	CBF7	0.662936	0.00124208
D4	16	CBF7	0.661953	-0.00103006
D4	17	CBF7	0.662634	-0.00163732
D4	18	CBF7	0.664492	-0.00106859
D4	19	CBF7	0.6657	-0.00114954
D4	20	CBF7	0.665904	-0.0022343
D4	21	CBF7	0.668357	-0.00107029
D4	22	CBF7	0.669542	-0.0011736
D4	23	CBF7	0.671688	-0.000316559
D4	24	CBF7	0.67307	-0.000223588
D4	25	CBF7	0.678515	0.00393227
D4	26	CBF7	0.686498	0.0106269
D4	27	CBF7	0.703183	0.0260233
D4	28	CBF7	0.733243	0.0547942
D4	29	CBF7	0.789471	0.109733
D4	30	CBF7	0.890098	0.209071
D4	31	CBF7	1.06056	0.378244
D4	32	CBF7	1.32294	0.639334
D4	33	CBF7	1.65511	0.970215
D4	34	CBF7	1.99438	1.3082
D4	35	CBF7	2.27103	1.58356
D4	36	CBF7	2.473	1.78424
D4	37	CBF7	2.62777	1.93773
D4	38	CBF7	2.74931	2.05797
D4	39	CBF7	2.84852	2.15589
D4	40	CBF7	2.92807	2.23415
D5	1	CBF7	0.611267	-0.0104625
D5	2	CBF7	0.614583	-0.00781571
D5	3	CBF7	0.617538	-0.0055304
D5	4	CBF7	0.619706	-0.00403163
D5	5	CBF7	0.621321	-0.00308576
D5	6	CBF7	0.622831	-0.00224556
D5	7	CBF7	0.625495	-0.000251061
D5	8	CBF7	0.625831	-0.000584719
D5	9	CBF7	0.627352	0.000266922
D5	10	CBF7	0.628685	0.000930629
D5	11	CBF7	0.630692	0.00226829
D5	12	CBF7	0.630191	0.0010979
D5	13	CBF7	0.632346	0.00258427
D5	14	CBF7	0.631595	0.00116372
D5	15	CBF7	0.632189	0.00108803
D5	16	CBF7	0.633524	0.00175406
D5	17	CBF7	0.634688	0.00224849
D5	18	CBF7	0.634519	0.00141022
D5	19	CBF7	0.635579	0.00180064
D5	20	CBF7	0.636882	0.00243431
D5	21	CBF7	0.636907	0.00179035
D5	22	CBF7	0.635972	0.000185385
D5	23	CBF7	0.637123	0.000667417
D5	24	CBF7	0.63797	0.000844988
D5	25	CBF7	0.639172	0.00137733
D5	26	CBF7	0.639337	0.000873557
D5	27	CBF7	0.640086	0.000952603
D5	28	CBF7	0.641097	0.00129486
D5	29	CBF7	0.641836	0.00136425
D5	30	CBF7	0.640093	-0.00104842
D5	31	CBF7	0.642391	0.000581005
D5	32	CBF7	0.641772	-0.000707698
D5	33	CBF7	0.643053	-9.56085e-05
D5	34	CBF7	0.64224	-0.00157886
D5	35	CBF7	0.642224	-0.00226413
D5	36	CBF7	0.644444	-0.000713204
D5	37	CBF7	0.643837	-0.00198969
D5	38	CBF7	0.644337	-0.00215884
D5	39	CBF7	0.644471	-0.00269366
D5	40	CBF7	0.645155	-0.00267982
D6	1	CBF7	0.535998	-0.0126579
D6	2	CBF7	0.542558	-0.00693066
D6	3	CBF7	0.544617	-0.00570532
D6	4	CBF7	0.54751	-0.00364511
D6	5	CBF7	0.549064	-0.00292397
D6	6	CBF7	0.550406	-0.00241532
D6	7	CBF7	0.551785	-0.00186924
D6	8	CBF7	0.554209	-0.000278647
D6	9	CBF7	0.555175	-0.00014527
D6	10	CBF7	0.557625	0.00147179
D6	11	CBF7	0.558979	0.00199265
D6	12	CBF7	0.559913	0.00209337
D6	13	CBF7	0.559955	0.00130299
D6	14	CBF7	0.560467	0.000981048
D6	15	CBF7	0.562785	0.00246626
D6	16	CBF7	0.563998	0.0028464
D6	17	CBF7	0.563692	0.00170692
D6	18	CBF7	0.564935	0.00211716
D6	19	CBF7	0.565628	0.00197677
D6	20	CBF7	0.566581	0.00209722
D6	21	CBF7	0.566975	0.00165773
D6	22	CBF7	0.567309	0.00115906
D6	23	CBF7	0.567541	0.000557573
D6	24	CBF7	0.569722	0.00190605
D6	25	CBF7	0.567419	-0.00122983
D6	26	CBF7	0.571309	0.00182674
D6	27	CBF7	0.571087	0.00077178
D6	28	CBF7	0.571285	0.000136913
D6	29	CBF7	0.572556	0.000574452
D6	30	CBF7	0.573265	0.000450278
D6	31	CBF7	0.573926	0.000278956
D6	32	CBF7	0.573647	-0.000832927
D6	33	CBF7	0.573891	-0.00142214
D6	34	CBF7	0.576578	0.000431967
D6	35	CBF7	0.574727	-0.00225217
D6	36	CBF7	0.577036	-0.00077709
D6	37	CBF7	0.576121	-0.00252448
D6	38	CBF7	0.577139	-0.00233984
D6	39	CBF7	0.577869	-0.00244274
D6	40	CBF7	0.577961	-0.00318376
D7	1	CBF7	0.607456	-0.0097388
D7	2	CBF7	0.61316	-0.00461902
D7	3	CBF7	0.614707	-0.00365613
D7	4	CBF7	0.615663	-0.00328499
D7	5	CBF7	0.617447	-0.00208541
D7	6	CBF7	0.617604	-0.00251309
D7	7	CBF7	0.619476	-0.00122541
D7	8	CBF7	0.620892	-0.000393413
D7	9	CBF7	0.62213	0.000260489
D7	10	CBF7	0.623148	0.000694092
D7	11	CBF7	0.624978	0.00193921
D7	12	CBF7	0.625401	0.00177796
D7	13	CBF7	0.625692	0.0014851
D7	14	CBF7	0.625391	0.000599415
D7	15	CBF7	0.626407	0.00103093
D7	16	CBF7	0.62773	0.00176989
D7	17	CBF7	0.626972	0.000426916
D7	18	CBF7	0.628808	0.00167871
D7	19	CBF7	0.629085	0.00137185
D7	20	CBF7	0.629519	0.00122085
D7	21	CBF7	0.631265	0.0023824
D7	22	CBF7	0.63032	0.000852925
D7	23	CBF7	0.629818	-0.000232676
D7	24	CBF7	0.632171	0.00153518
D7	25	CBF7	0.632632	0.00141255
D7	26	CBF7	0.632916	0.00111129
D7	27	CBF7	0.632999	0.000610646
D7	28	CBF7	0.633106	0.000132834
D7	29	CBF7	0.634061	0.000503912
D7	30	CBF7	0.634219	7.70621e-05
D7	31	CBF7	0.634851	0.000124844
D7	32	CBF7	0.634673	-0.000637997
D7	33	CBF7	0.635451	-0.000443707
D7	34	CBF7	0.6371	0.000620811
D7	35	CBF7	0.636522	-0.000541501
D7	36	CBF7	0.635544	-0.00210388
D7	37	CBF7	0.636313	-0.00191924
D7	38	CBF7	0.635995	-0.00282239
D7	39	CBF7	0.637641	-0.00176002
D7	40	CBF7	0.638173	-0.00181256
D8	1	CBF8	0.623823	-0.00430207
D8	2	CBF8	0.62536	-0.00357214
D8	3	CBF8	0.626714	-0.00302556
D8	4	CBF8	0.628629	-0.00191845
D8	5	CBF8	0.630705	-0.000649694
D8	6	CBF8	0.631612	-0.000549429
D8	7	CBF8	0.632825	-0.000143511
D8	8	CBF8	0.634085	0.000308839
D8	9	CBF8	0.636221	0.00163827
D8	10	CBF8	0.635884	0.000493813
D8	11	CBF8	0.637411	0.00121319
D8	12	CBF8	0.638059	0.00105388
D8	13	CBF8	0.640198	0.00238629
D8	14	CBF8	0.640664	0.00204435
D8	15	CBF8	0.640944	0.00151722
D8	16	CBF8	0.641944	0.00171005
D8	17	CBF8	0.640946	-9.48896e-05
D8	18	CBF8	0.64119	-0.000657607
D8	19	CBF8	0.642668	1.30154e-05
D8	20	CBF8	0.644046	0.000583919
D8	21	CBF8	0.64298	-0.0012901
D8	22	CBF8	0.643845	-0.00123168
D8	23	CBF8	0.643657	-0.00222689
D8	24	CBF8	0.645363	-0.00132798
D8	25	CBF8	0.646278	-0.00122014
D8	26	CBF8	0.649679	0.00137309
D8	27	CBF8	0.654525	0.00541173
D8	28	CBF8	0.665308	0.0153878
D8	29	CBF8	0.68408	0.0333526
D8	30	CBF8	0.719936	0.0684009
D8	31	CBF8	0.78846	0.136118
D8	32	CBF8	0.910051	0.256902
D8	33	CBF8	1.1094	0.455443
D8	34	CBF8	1.39784	0.743081
D8	35	CBF8	1.74901	1.09344
D8	36	CBF8	2.098	1.44162
D8	37	CBF8	2.38448	1.72729
D8	38	CBF8	2.5969	1.9389
D8	39	CBF8	2.75536	2.09656
D8	40	CBF8	2.88225	2.22264
D9	1	CBF8	0.616714	-0.00266288
D9	2	CBF8	0.61756	-0.00290285
D9	3	CBF8	0.618916	-0.00263397
D9	4	CBF8	0.62086	-0.00177662
D9	5	CBF8	0.622091	-0.00163232
D9	6	CBF8	0.624834	2.32525e-05
D9	7	CBF8	0.626652	0.000754957
D9	8	CBF8	0.627591	0.00060636
D9	9	CBF8	0.628991	0.000919878
D9	10	CBF8	0.630399	0.00124102
D9	11	CBF8	0.631945	0.0016998
D9	12	CBF8	0.632564	0.00123262
D9	13	CBF8	0.633823	0.00140475
D9	14	CBF8	0.634097	0.000592159
D9	15	CBF8	0.634845	0.000252588
D9	16	CBF8	0.636635	0.000956397
D9	17	CBF8	0.63784	0.00107441
D9	18	CBF8	0.638504	0.000651217
D9	19	CBF8	0.63926	0.000320945
D9	20	CBF8	0.639338	-0.000688224
D9	21	CBF8	0.640149	-0.000963898
D9	22	CBF8	0.640405	-0.00179479
D9	23	CBF8	0.642151	-0.00113604
D9	24	CBF8	0.642375	-0.0019987
D9	25	CBF8	0.644132	-0.00132833
D9	26	CBF8	0.64877	0.00222255
D9	27	CBF8	0.655229	0.00759466
D9	28	CBF8	0.667249	0.0185284
D9	29	CBF8	0.691184	0.0413758
D9	30	CBF8	0.737418	0.0865229
D9	31	CBF8	0.821457	0.169476
D9	32	CBF8	0.967513	0.314445
D9	33	CBF8	1.20106	0.5469
D9	34	CBF8	1.52676	0.87152
D9	35	CBF8	1.90179	1.24546
D9	36	CBF8	2.26349	1.60607
D9	37	CBF8	2.53707	1.87857
D9	38	CBF8	2.74852	2.08893
D9	39	CBF8	2.91028	2.2496
D9	40	CBF8	3.03718	2.37542
D10	1	CBF8	0.594366	-0.00223552
D10	2	CBF8	0.595969	-0.00175019
D10	3	CBF8	0.595916	-0.00292223
D10	4	CBF8	0.597894	-0.0020624
D10	5	CBF8	0.600139	-0.000935485
D10	6	CBF8	0.600798	-0.00139405
D10	7	CBF8	0.603877	0.000566669
D10	8	CBF8	0.604566	0.000137186
D10	9	CBF8	0.606644	0.00109685
D10	10	CBF8	0.608847	0.00218204
D10	11	CBF8	0.609616	0.00183273
D10	12	CBF8	0.611201	0.00229976
D10	13	CBF8	0.610338	0.000318646
D10	14	CBF8	0.612969	0.00183108
D10	15	CBF8	0.613625	0.001369
D10	16	CBF8	0.613947	0.000572886
D10	17	CBF8	0.615254	0.00076216
D10	18	CBF8	0.616187	0.000577235
D10	19	CBF8	0.616642	-8.61955e-05
D10	20	CBF8	0.617414	-0.000432589
D10	21	CBF8	0.617712	-0.00125302
D10	22	CBF8	0.619462	-0.000620704
D10	23	CBF8	0.619146	-0.002055
D10	24	CBF8	0.620994	-0.00132499
D10	25	CBF8	0.621801	-0.0016361
D10	26	CBF8	0.623377	-0.00117849
D10	27	CBF8	0.628029	0.00235502
D10	28	CBF8	0.634544	0.00775225
D10	29	CBF8	0.648516	0.0206064
D10	30	CBF8	0.673214	0.0441862
D10	31	CBF8	0.723229	0.0930825
D10	32	CBF8	0.810171	0.178907
D10	33	CBF8	0.966022	0.333639
D10	34	CBF8	1.21046	0.576956
D10	35	CBF8	1.54293	0.908312
D10	36	CBF8	1.92513	1.28939
D10	37	CBF8	2.27478	1.63793
D10	38	CBF8	2.54838	1.91041
D10	39	CBF8	2.7622	2.12311
D10	40	CBF8	2.93237	2.29216
D11	1
D11	2
D11	3
D11	4
D11	5
D11	6
D11	7
D11	8
D11	9
D11	10
D11	11
D11	12
D11	13
D11	14
D11	15
D11	16
D11	17
D11	18
D11	19
D11	20
D11	21
D11	22
D11	23
D11	24
D11	25
D11	26
D11	27
D11	28
D11	29
D11	30
D11	31
D11	32
D11	33
D11	34
D11	35
D11	36
D11	37
D11	38
D11	39
D11	40
D12	1
D12	2
D12	3
D12	4
D12	5
D12	6
D12	7
D12	8
D12	9
D12	10
D12	11
D12	12
D12	13
D12	14
D12	15
D12	16
D12	17
D12	18
D12	19
D12	20
D12	21
D12	22
D12	23
D12	24
D12	25
D12	26
D12	27
D12	28
D12	29
D12	30
D12	31
D12	32
D12	33
D12	34
D12	35
D12	36
D12	37
D12	38
D12	39
D12	40
E1	1
E1	2
E1	3
E1	4
E1	5
E1	6
E1	7
E1	8
E1	9
E1	10
E1	11
E1	12
E1	13
E1	14
E1	15
E1	16
E1	17
E1	18
E1	19
E1	20
E1	21
E1	22
E1	23
E1	24
E1	25
E1	26
E1	27
E1	28
E1	29
E1	30
E1	31
E1	32
E1	33
E1	34
E1	35
E1	36
E1	37
E1	38
E1	39
E1	40
E2	1	CBF7	0.737584	-0.00461552
E2	2	CBF7	0.74104	-0.00217805
E2	3	CBF7	0.74128	-0.00295595
E2	4	CBF7	0.743293	-0.00196145
E2	5	CBF7	0.745219	-0.00105349
E2	6	CBF7	0.747152	-0.000138912
E2	7	CBF7	0.749499	0.00119021
E2	8	CBF7	0.750557	0.00122902
E2	9	CBF7	0.752308	0.00196209
E2	10	CBF7	0.751334	-3.00115e-05
E2	11	CBF7	0.754029	0.00164703
E2	12	CBF7	0.754415	0.00101403
E2	13	CBF7	0.755379	0.000960084
E2	14	CBF7	0.756463	0.00102613
E2	15	CBF7	0.757339	0.000883017
E2	16	CBF7	0.758801	0.00132683
E2	17	CBF7	0.759292	0.000800347
E2	18	CBF7	0.75921	-0.000300431
E2	19	CBF7	0.76094	0.000411786
E2	20	CBF7	0.76083	-0.000716589
E2	21	CBF7	0.761627	-0.000938675
E2	22	CBF7	0.760563	-0.00302078
E2	23	CBF7	0.762436	-0.00216605
E2	24	CBF7	0.76372	-0.00190033
E2	25	CBF7	0.766151	-0.000487822
E2	26	CBF7	0.766808	-0.000849026
E2	27	CBF7	0.772744	0.00406895
E2	28	CBF7	0.780662	0.0109693
E2	29	CBF7	0.794822	0.0241102
E2	30	CBF7	0.822835	0.0511053
E2	31	CBF7	0.877277	0.104529
E2	32	CBF7	0.970128	0.196362
E2	33	CBF7	1.12216	0.347379
[truncated: 1,847 more rows]

## Sheet: BioGroup Analysis Result
Block Type	96alum
Chemistry	SYBR_GREEN
Experiment File Name	D:\HAIFENG\CBF78Untitled.eds
Experiment Run End Time	2013-01-10 10:21:38 AM CST
Instrument Type	sds7500
Passive Reference	ROX
Biogroup Name	Target Name	Task	RQ	RQ Min	RQ Max	Cт Mean	ΔCт Mean	ΔCт SE	ΔΔCт
Analysis Type	Singleplex
Endogenous Control	CBF7
RQ Min/Max Confidence Level	95.0
Reference Biogroup Name

## Sheet: Technical Analysis Result
Block Type	96alum
Chemistry	SYBR_GREEN
Experiment File Name	D:\HAIFENG\CBF78Untitled.eds
Experiment Run End Time	2013-01-10 10:21:38 AM CST
Instrument Type	sds7500
Passive Reference	ROX
Sample Name	Target Name	Task	RQ	RQ Min	RQ Max	Cт Mean	ΔCт Mean	ΔCт SE	ΔΔCт
6-2	CBF8	UNKNOWN				27.0148	-3.63296	0.0803645
6-3	CBF8	UNKNOWN				26.0967	-3.24949	0.0845686
12-1	CBF8	UNKNOWN				29.6966	-5.5007	0.945007
12-2	CBF8	UNKNOWN				32.6802
3-1	CBF8	UNKNOWN
12-3	CBF8	UNKNOWN				35.2757
3-2	CBF8	UNKNOWN
24-1	CBF8	UNKNOWN				33.3462	-1.31029
3-3	CBF8	UNKNOWN
24-2	CBF8	UNKNOWN				29.2185	-5.32933
6-1	CBF8	UNKNOWN				25.9691	-2.60913	0.168527
24-3	CBF8	UNKNOWN				35.0256
Analysis Type	Singleplex
Endogenous Control	CBF7
RQ Min/Max Confidence Level	95.0
Reference Sample	3-1
