# Supplementary material for: Genome-wide identification of CBF genes and their responses to cold acclimation in Taraxacum kok-saghyz
Source: PeerJ journal article supplement (doi:10.7717/peerj.13429), 2022-05-12
Supplement: Raw_data.zip [file CBF8-CBF9.xls]

## Sheet: Results
Block Type	96alum
Chemistry	SYBR_GREEN
Experiment File Name	D:\HAIFENG\89Untitled.eds
Experiment Run End Time	2021-08-29 16:18:57 PM CST
Instrument Type	sds7500
Passive Reference	ROX
Well	Sample Name	Target Name	Task	Reporter	Quencher	RQ	RQ Min	RQ Max	Cт	Cт Mean	Cт SD	ΔCт	ΔCт Mean	ΔCт SE	HK Control ΔCт Mean	HK Control ΔCт SE	ΔΔCт	Automatic Ct Threshold	Ct Threshold	Automatic Baseline	Baseline Start	Baseline End	Efficiency	Tm1	Tm2	Tm3	Comments	HIGHSD	NOAMP	OUTLIERRG	EXPFAIL
A1	3-1	CBF8	UNKNOWN	SYBR	None				30.9766	31.0391								TRUE	0.242831	TRUE	3	39	1	61.2836				N	Y	N	Y
A2	3-1	CBF8	UNKNOWN	SYBR	None				31.108	31.0391								TRUE	0.242831	TRUE	3	39	1	61.8138				N	Y	N	Y
A3	3-1	CBF8	UNKNOWN	SYBR	None				31.0326	31.0391								TRUE	0.242831	TRUE	3	39	1	63.4042				N	Y	N	Y
A7	3-1	CBF9	UNKNOWN	SYBR	None				30.5766	30.3824								TRUE	0.16629	TRUE	3	39	1	61.637				N	Y	N	Y
A8	3-1	CBF9	UNKNOWN	SYBR	None				30.408	30.3824								TRUE	0.16629	TRUE	3	39	1	61.4603				N	Y	N	Y
A9	3-1	CBF9	UNKNOWN	SYBR	None				30.1626	30.3824								TRUE	0.16629	TRUE	3	39	1	61.4603				N	Y	N	Y
A10	6-3	CBF9	UNKNOWN	SYBR	None				29.5763	29.5664								TRUE	0.16629	TRUE	3	39	1	61.4603				N	Y	N	Y
A11	6-3	CBF9	UNKNOWN	SYBR	None				29.5405	29.5664								TRUE	0.16629	TRUE	3	39	1	61.2836				N	Y	N	Y
A12	6-3	CBF9	UNKNOWN	SYBR	None				29.5825	29.5664								TRUE	0.16629	TRUE	3	39	1	61.2836				N	Y	N	Y
B1	3-2	CBF8	UNKNOWN	SYBR	None				30.8695	30.7989								TRUE	0.242831	TRUE	3	39	1	60.9302				N	Y	N	Y
B2	3-2	CBF8	UNKNOWN	SYBR	None				30.7846	30.7989								TRUE	0.242831	TRUE	3	39	1	61.2836				N	Y	N	Y
B3	3-2	CBF8	UNKNOWN	SYBR	None				30.7425	30.7989								TRUE	0.242831	TRUE	3	39	1	65.1714				N	Y	N	Y
B4	12-1	CBF8	UNKNOWN	SYBR	None				26.7866	26.7885								TRUE	0.242831	TRUE	3	29	1	83.727				N	N	N	N
B5	12-1	CBF8	UNKNOWN	SYBR	None				26.8443	26.7885								TRUE	0.242831	TRUE	3	30	1	83.727				N	N	N	N
B6	12-1	CBF8	UNKNOWN	SYBR	None				26.7346	26.7885								TRUE	0.242831	TRUE	3	29	1	83.727				N	N	N	N
B7	3-2	CBF9	UNKNOWN	SYBR	None				30.5466	30.5814								TRUE	0.16629	TRUE	3	39	1	61.2836				N	Y	N	Y
B8	3-2	CBF9	UNKNOWN	SYBR	None				30.5492	30.5814								TRUE	0.16629	TRUE	3	39	1	61.8138				N	Y	N	Y
B9	3-2	CBF9	UNKNOWN	SYBR	None				30.6483	30.5814								TRUE	0.16629	TRUE	3	39	1	61.8138				N	Y	N	Y
B10	12-1	CBF9	UNKNOWN	SYBR	None				30.3631	30.2793								TRUE	0.16629	TRUE	3	31	1	85.4942				N	N	N	N
B11	12-1	CBF9	UNKNOWN	SYBR	None				30.1347	30.2793								TRUE	0.16629	TRUE	3	39	1	61.1069				N	Y	N	Y
B12	12-1	CBF9	UNKNOWN	SYBR	None				30.3402	30.2793								TRUE	0.16629	TRUE	3	31	1	85.1407				N	N	N	N
C1	3-3	CBF8	UNKNOWN	SYBR	None				30.7882	30.6815								TRUE	0.242831	TRUE	3	39	1	60.9302				N	Y	N	Y
C2	3-3	CBF8	UNKNOWN	SYBR	None				30.5139	30.6815								TRUE	0.242831	TRUE	3	39	1	60.7534				N	Y	N	Y
C3	3-3	CBF8	UNKNOWN	SYBR	None				30.7425	30.6815								TRUE	0.242831	TRUE	3	30	1	83.727				N	N	N	N
C4	12-2	CBF8	UNKNOWN	SYBR	None				27.1872	27.1483								TRUE	0.242831	TRUE	3	31	1	83.727				N	N	N	N
C5	12-2	CBF8	UNKNOWN	SYBR	None				27.1038	27.1483								TRUE	0.242831	TRUE	3	39	1	65.7016				N	Y	N	Y
C6	12-2	CBF8	UNKNOWN	SYBR	None				27.1538	27.1483								TRUE	0.242831	TRUE	3	39	1	64.6413				N	Y	N	Y
C7	3-3	CBF9	UNKNOWN	SYBR	None				30.2846	30.2641								TRUE	0.16629	TRUE	3	39	1	61.4603				N	Y	N	Y
C8	3-3	CBF9	UNKNOWN	SYBR	None				30.2593	30.2641								TRUE	0.16629	TRUE	3	39	1	61.8138				N	Y	N	Y
C9	3-3	CBF9	UNKNOWN	SYBR	None				30.2483	30.2641								TRUE	0.16629	TRUE	3	39	1	61.4603				N	Y	N	Y
C10	12-2	CBF9	UNKNOWN	SYBR	None				30.8459	30.8438								TRUE	0.16629	TRUE	3	39	1	61.4603				N	Y	N	Y
C11	12-2	CBF9	UNKNOWN	SYBR	None				30.8326	30.8438								TRUE	0.16629	TRUE	3	39	1	61.4603				N	Y	N	Y
C12	12-2	CBF9	UNKNOWN	SYBR	None				30.8529	30.8438								TRUE	0.16629	TRUE	3	39	1	61.2836				N	Y	N	Y
D1	6-1	CBF8	UNKNOWN	SYBR	None				27.3457	27.413								TRUE	0.242831	TRUE	3	39	1	64.2878				N	Y	N	Y
D2	6-1	CBF8	UNKNOWN	SYBR	None				27.4158	27.413								TRUE	0.242831	TRUE	3	39	1	61.1069				N	Y	N	Y
D3	6-1	CBF8	UNKNOWN	SYBR	None				27.4775	27.413								TRUE	0.242831	TRUE	3	39	1	63.581				N	Y	N	Y
D4	12-3	CBF8	UNKNOWN	SYBR	None				26.8525	26.7219								TRUE	0.242831	TRUE	3	39	1	60.5767				N	Y	N	Y
D5	12-3	CBF8	UNKNOWN	SYBR	None				26.6358	26.7219								TRUE	0.242831	TRUE	3	39	1	65.1714				N	Y	N	Y
D6	12-3	CBF8	UNKNOWN	SYBR	None				26.6775	26.7219								TRUE	0.242831	TRUE	3	39	1	60.9302				N	Y	N	Y
D10	12-3	CBF9	UNKNOWN	SYBR	None				30.215	29.9095								TRUE	0.16629	TRUE	3	30	1	85.6709				N	N	N	N
D11	12-3	CBF9	UNKNOWN	SYBR	None				29.7542	29.9095								TRUE	0.16629	TRUE	3	39	1	61.1069				N	Y	N	Y
D12	12-3	CBF9	UNKNOWN	SYBR	None				29.7594	29.9095								TRUE	0.16629	TRUE	3	39	1	61.2836				N	Y	N	Y
E1	6-2	CBF8	UNKNOWN	SYBR	None				27.5048	27.4345								TRUE	0.242831	TRUE	3	39	1	64.818				N	Y	N	Y
E2	6-2	CBF8	UNKNOWN	SYBR	None				27.3359	27.4345								TRUE	0.242831	TRUE	3	31	1	84.2571				N	N	N	N
E3	6-2	CBF8	UNKNOWN	SYBR	None				27.4629	27.4345								TRUE	0.242831	TRUE	3	39	1	60.7534				N	Y	N	Y
E4	24-1	CBF8	UNKNOWN	SYBR	None				26.8584	26.9676								TRUE	0.242831	TRUE	3	39	1	63.2275				N	Y	N	Y
E5	24-1	CBF8	UNKNOWN	SYBR	None				27.0546	26.9676								TRUE	0.242831	TRUE	3	31	1	84.0804				N	N	N	N
E6	24-1	CBF8	UNKNOWN	SYBR	None				26.99	26.9676								TRUE	0.242831	TRUE	3	31	1	83.9037				N	N	N	N
E10	24-1	CBF9	UNKNOWN	SYBR	None				27.1339	27.1335								TRUE	0.16629	TRUE	3	31	1	85.6709				N	N	N	N
E11	24-1	CBF9	UNKNOWN	SYBR	None				27.1333	27.1335								TRUE	0.16629	TRUE	3	30	1	85.4942				N	N	N	N
E12	24-1	CBF9	UNKNOWN	SYBR	None				27.1332	27.1335								TRUE	0.16629	TRUE	3	31	1	85.3175				N	N	N	N
F1	6-3	CBF8	UNKNOWN	SYBR	None				27.4019	27.5122								TRUE	0.242831	TRUE	3	39	1	63.2275				N	Y	N	Y
F2	6-3	CBF8	UNKNOWN	SYBR	None				27.5706	27.5122								TRUE	0.242831	TRUE	3	39	1	60.9302				N	Y	N	Y
F3	6-3	CBF8	UNKNOWN	SYBR	None				27.5642	27.5122								TRUE	0.242831	TRUE	3	39	1	64.1111				N	Y	N	Y
F4	24-2	CBF8	UNKNOWN	SYBR	None				26.2079	26.0557								TRUE	0.242831	TRUE	3	29	1	83.9037				Y	N	Y	N
F5	24-2	CBF8	UNKNOWN	SYBR	None				25.9824	26.0557								TRUE	0.242831	TRUE	3	31	1	83.9037				Y	N	N	N
F6	24-2	CBF8	UNKNOWN	SYBR	None				25.9767	26.0557								TRUE	0.242831	TRUE	3	30	1	83.9037				Y	N	N	N
F10	24-2	CBF9	UNKNOWN	SYBR	None				26.4219	26.4228								TRUE	0.16629	TRUE	3	30	1	85.4942				Y	N	N	N
F11	24-2	CBF9	UNKNOWN	SYBR	None				26.4229	26.4228								TRUE	0.16629	TRUE	3	31	1	85.3175				Y	N	N	N
F12	24-2	CBF9	UNKNOWN	SYBR	None				26.4237	26.4228								TRUE	0.16629	TRUE	3	39	1	61.1069				N	Y	N	Y
G4	24-3	CBF8	UNKNOWN	SYBR	None				26.7011	26.7575								TRUE	0.242831	TRUE	3	39	1	64.4646				N	Y	N	Y
G5	24-3	CBF8	UNKNOWN	SYBR	None				26.7258	26.7575								TRUE	0.242831	TRUE	3	39	1	64.2878				N	Y	N	Y
G6	24-3	CBF8	UNKNOWN	SYBR	None				26.8457	26.7575								TRUE	0.242831	TRUE	3	39	1	63.0508				N	Y	N	Y
G7	6-1	CBF9	UNKNOWN	SYBR	None				29.265	29.2492								TRUE	0.16629	TRUE	3	31	1	85.6709				N	N	N	N
G8	6-1	CBF9	UNKNOWN	SYBR	None				29.2278	29.2492								TRUE	0.16629	TRUE	3	39	1	61.637				N	Y	N	Y
G9	6-1	CBF9	UNKNOWN	SYBR	None				29.2547	29.2492								TRUE	0.16629	TRUE	3	39	1	61.637				N	Y	N	Y
G10	24-3	CBF9	UNKNOWN	SYBR	None				27.0181	27.0155								TRUE	0.16629	TRUE	3	31	1	85.3175				N	N	N	N
G11	24-3	CBF9	UNKNOWN	SYBR	None				27.0146	27.0155								TRUE	0.16629	TRUE	3	39	1	61.1069				N	Y	N	Y
G12	24-3	CBF9	UNKNOWN	SYBR	None				27.0136	27.0155								TRUE	0.16629	TRUE	3	39	1	61.2836				N	Y	N	Y
H7	6-2	CBF9	UNKNOWN	SYBR	None				29.18	29.1815								TRUE	0.16629	TRUE	3	39	1	61.4603				N	Y	N	Y
H8	6-2	CBF9	UNKNOWN	SYBR	None				29.2089	29.1815								TRUE	0.16629	TRUE	3	39	1	61.2836				N	Y	N	Y
H9	6-2	CBF9	UNKNOWN	SYBR	None				29.1555	29.1815								TRUE	0.16629	TRUE	3	39	1	61.4603				N	Y	N	Y
Analysis Type	Singleplex
Endogenous Control	CBF8
RQ Min/Max Confidence Level	95.0
Reference Sample	3-1

## Sheet: Raw Data
Block Type	96alum
Chemistry	SYBR_GREEN
Experiment File Name	D:\HAIFENG\89Untitled.eds
Experiment Run End Time	2021-08-29 16:18:57 PM CST
Instrument Type	sds7500
Passive Reference	ROX
Well	Cycle	1	2	3	4	5
A1	1	281437	71292.3	46203.5	430145	1696.01
A2	1	258567	62850.2	47220.5	404094	1859.07
A3	1	261770	60465.5	50600.9	411498	1738.09
A4	1	248415	55685.8	48528.5	372122	1375.23
A5	1	311452	72242.2	59602.6	426545	1974.96
A6	1	326212	67410.7	60718.4	423823	2186.65
A7	1	229303	50589.6	44224.7	326006	1540.35
A8	1	305383	65699.4	55891.4	408580	2336.28
A9	1	329110	71171.8	57685.1	423012	1923.08
A10	1	303816	71384.4	53392.3	415077	1819.64
A11	1	331840	84537.7	54252.9	452994	0
A12	1	372255	95439.3	57645.5	491439	2175.03
B1	1	258371	65235	46216.2	395554	1982.24
B2	1	245531	58284.3	48859.6	396646	2164.1
B3	1	263111	60516.1	54662	415303	1681.07
B4	1	226692	49614.1	50766.6	373283	8741.78
B5	1	296874	67885	62748.4	427763	2816.88
B6	1	314551	65543.5	68459.1	454858	2799.96
B7	1	210917	46746	43380.6	301095	1854.21
B8	1	292765	64352.5	56709.2	382867	2077.91
B9	1	292463	64405.8	56729.9	398951	1585.23
B10	1	257643	58108.7	50756.1	373541	1798.57
B11	1	307251	73298.5	54320.2	412861	2036.3
B12	1	304323	75482.7	52150.9	432788	1841.68
C1	1	325017	83135	58525.1	467544	2759.69
C2	1	254619	60538.4	52447.1	398357	2181.71
C3	1	273224	61411.2	57473	405012	2408.54
C4	1	203597	42949.9	50644.6	355522	2211.37
C5	1	306065	64836.7	71016.1	467746	3093.35
C6	1	310822	63443.5	70623.7	449371	3040.78
C7	1	234864	53713.2	54273.8	360390	1917.74
C8	1	300844	67923.4	63549	415394	1814.43
C9	1	330243	74678.2	66191.9	439232	1715.89
C10	1	246918	55410	52505.4	374601	2058.68
C11	1	304152	73370.5	56717.2	420156	1974.06
C12	1	301527	76106.3	54942.8	444001	1698.11
D1	1	358430	89792.1	65944.7	508381	2835.8
D2	1	266606	64433.5	54692.6	401280	1697.83
D3	1	322430	73674.5	66329	442232	2591.27
D4	1	264663	66144.8	67029.2	441268	2368.76
D5	1	359488	82157.9	83639.3	514254	3436.28
D6	1	339094	75523.3	81207.6	488088	3012.12
D7	1	283948	62828	66186.4	408438	2561.09
D8	1	303804	66203.1	65359.7	405287	1661.65
D9	1	309336	68637.8	65495.6	416039	2464.58
D10	1	288451	67845.2	60593.9	410956	1810.31
D11	1	291073	71251.6	58281.1	425109	637.531
D12	1	333709	85436.9	63038.1	491972	2119.26
E1	1	367533	91778.1	74094.1	579426	2879.91
E2	1	307628	79837.4	68789.6	496991	2302.31
E3	1	347274	81879.6	81070.9	538467	2106.87
E4	1	309885	75439.9	77034.8	483374	2228.35
E5	1	384471	87216.7	92573.9	557397	3413.35
E6	1	372401	82900.3	92982.9	545648	3601.1
E7	1	289612	66660	70889.8	430140	2181.17
E8	1	390310	90141.9	85206	512139	2743.79
E9	1	358275	82306.5	76092.4	475431	2600.02
E10	1	304668	70352.3	64726.9	431145	1689.89
E11	1	318494	76006.4	62853.4	446849	1714.44
E12	1	359873	90219.3	66904.6	513909	1979.4
F1	1	381624	103123	78232	580715	2837.02
F2	1	304227	82438.8	66973.3	484909	1806.96
F3	1	394408	99692.3	89074.3	571141	2722.15
F4	1	323772	74848.1	78025.8	495907	2384.4
F5	1	458384	101343	108471	662222	3235.73
F6	1	377361	83634.4	92643.8	551995	3224.55
F7	1	321541	74869.6	78405.9	480869	2328.6
F8	1	376761	86685.7	83817.2	510859	2972.33
F9	1	426047	98794.4	89416.5	560620	2628.28
F10	1	349558	85101.6	72667.5	493533	1640.37
F11	1	339253	83027.4	66518.7	478186	365.704
F12	1	340255	87347.3	65477.7	516550	1886.55
G1	1	361247	89488.2	73397.4	591075	3098.96
G2	1	348456	95264.5	73412.4	534957	7221.47
G3	1	416776	97779.5	90225.1	616960	3226.28
G4	1	382180	95819.6	94881.2	624553	2649.43
G5	1	459030	105738	114627	725632	3561.53
G6	1	475466	111486	118949	732293	3783.09
G7	1	338948	78625.4	76026.9	472586	2290.37
G8	1	395622	90033.5	84068	524942	2668.37
G9	1	446693	101988	90764.2	578508	2614.34
G10	1	350998	86426	71064.8	493457	988.627
G11	1	326387	82029.1	64216.8	468383	1926.76
G12	1	394537	102842	72926.8	579802	1928.51
H1	1	431413	108320	78663	647014	2675.78
H2	1	336565	85311.2	71131.4	551982	2164.82
H3	1	433556	102351	85703.2	599024	3332.76
H4	1	306254	25148	13529.4	11134.4	3413.52
H5	1	437787	38077.4	21304.5	16896.5	4494.05
H6	1	390468	33704.6	18827.5	14704	3789.63
H7	1	334357	80789	72847.7	483556	1981.26
H8	1	404192	95141.7	85390.7	566352	2680.02
H9	1	403633	95720.3	84095.9	575496	2519.24
H10	1	284832	22609.9	11690.2	9675.83	2144.92
H11	1	298374	23422.7	11332.7	9066.72	3044.19
H12	1	337264	25381.2	11632.6	9452.03	2088.5
A1	2	282476	71740.4	46718.2	430904	1633.35
A2	2	260115	63347.8	47243.4	402721	1869.69
A3	2	261735	60217.7	50618.2	411237	1819.5
A4	2	248510	55767.5	48541.8	371448	1408.18
A5	2	312700	72364.7	59352	425347	1932.03
A6	2	326782	67699.8	60869.7	424613	2186.65
A7	2	228617	50549.3	44124.2	325203	1495.3
A8	2	304703	65978.8	56004.1	407710	2137.02
A9	2	327293	71561.2	57621.9	421651	2198.77
A10	2	301263	70890.6	53521.9	413287	1738.12
A11	2	330168	84253.8	54106.6	450642	0
A12	2	368651	94983.4	57827.2	491820	1848.92
B1	2	257717	64982.3	46221.6	394468	1894.32
B2	2	246147	58682.8	49024.8	396345	2065.48
B3	2	264446	61019.5	54672.1	416104	1873.31
B4	2	227605	49443.3	50883.9	373765	9131.57
B5	2	298421	68575.9	63092.1	427699	2928.1
B6	2	315431	65748.9	68352.6	454714	2875.03
B7	2	210791	47049.9	43339.5	300620	1854.21
B8	2	291749	64349.5	56710	382634	2021.43
B9	2	291505	64506	56607.4	398571	1670.65
B10	2	255659	57994.8	50647.1	373413	2029.34
B11	2	306578	73162.9	54070.7	411940	2071.19
B12	2	301414	75231.4	52158.8	431913	2164.11
C1	2	325950	83415	58409.4	467261	2754.77
C2	2	254205	61007	52365.2	398536	2278.05
C3	2	273193	61723	57668.2	405638	2504.06
C4	2	204099	43197	50709.7	355955	2299.28
C5	2	307490	65317.6	71052.8	467912	2956.41
C6	2	313175	63904.7	70658.2	450399	3015.89
C7	2	233632	53457.4	54287.3	359994	1915.27
C8	2	299575	68112.5	63830.3	415168	1581.02
C9	2	329897	74716.3	66303.4	439867	1867.97
C10	2	245134	54899.9	52617.3	375193	2344.71
C11	2	303964	73607.3	56532	420016	1945.46
C12	2	301018	76201.2	55164.1	443870	1644.29
D1	2	356875	89943.9	65876.6	507349	2982.46
D2	2	266149	64278	54789	400641	1468.37
D3	2	324280	74450.6	66683.9	444140	2502.75
D4	2	268164	68432.5	67477.3	441558	1930.54
D5	2	360507	82611.4	83822.1	514356	3483.7
D6	2	340450	75841.9	81131.6	488094	3050.5
D7	2	282298	62804.9	66144.7	407991	2897.07
D8	2	303381	66834.9	65264.6	404825	2023.75
D9	2	309253	68547.2	65638	416617	2414.83
D10	2	287489	67593.7	60521.3	411883	1723.94
D11	2	289254	71281	58083.9	424232	812.803
D12	2	330761	84748.6	63135.4	491453	2120.25
E1	2	367837	92371.2	74032.9	579228	2792.43
E2	2	307676	80670.6	68857.7	496822	2172.51
E3	2	348954	82172.9	81298.8	539970	2345.32
E4	2	311943	76206.8	77346.2	484004	2953.18
E5	2	386252	87751.6	92946.3	558378	3279.1
E6	2	374920	83539.7	93582.5	546757	3635.28
E7	2	287851	66783.8	70927.2	429523	1919.63
E8	2	389425	90682.4	84992.2	512204	2801.78
E9	2	357562	82138.2	76216.4	475335	2427.42
E10	2	302166	70057.6	64810.3	431904	2019.26
E11	2	318148	76214.1	63021.9	446367	1687.52
E12	2	356816	89733.7	67031.4	512401	2043.57
F1	2	381155	103365	78260.7	579584	2664.99
F2	2	304886	82804.4	67194.9	485823	1790.57
F3	2	396939	100484	89768.1	573638	2989.15
F4	2	325760	75671.1	78224.4	496713	2579.75
F5	2	460034	101845	108603	664043	3296.83
F6	2	380211	84178.8	92893	555109	3561.34
F7	2	318663	74829.3	78478.6	479880	2402.23
F8	2	375334	87030.8	84049.2	510344	3393.34
F9	2	425584	98990.7	89474.3	561200	2522.59
F10	2	347169	84471.8	73007.8	494725	1679.81
F11	2	338079	82718.7	66595.5	478484	674.203
F12	2	337506	87032.9	65368.4	515572	2020.63
G1	2	361485	89463.5	73583.3	591337	2949.96
G2	2	348835	96061.4	73649.4	535999	7902.4
G3	2	418413	98214.3	90416.7	617916	3174.5
G4	2	384552	96573.8	95162.9	626982	2896.21
G5	2	459976	105950	114927	726808	3644.04
G6	2	478000	112062	119441	734108	3820.12
G7	2	338245	78995.1	76451.4	472996	2616.36
G8	2	395297	90584.1	84295.8	524573	2686.83
G9	2	446144	102324	90829.9	580113	2936.95
G10	2	350396	86282	71370	494544	1258.15
G11	2	326467	82073.7	64584	469207	1763.58
G12	2	390320	101699	72612.4	580233	1495.43
H1	2	432980	109116	79356.1	648207	2935.72
H2	2	336748	85202.4	70862.5	551373	1940.44
H3	2	434784	102161	86153.9	599064	3508.61
H4	2	305757	25041.1	13423.5	11204.6	3384.37
H5	2	435522	38097.5	21195.5	16928.3	4729.59
H6	2	388574	33818.5	18633.2	14678.9	3940.68
H7	2	332141	80547.2	72759.3	482120	2535.05
H8	2	402204	95029.2	85432.4	564690	2923.07
H9	2	401433	95703.1	84207.5	574697	2791.18
H10	2	283161	22484.7	11628.1	9287.57	2284.45
H11	2	296711	23149.8	11134.4	9259.23	2587.1
H12	2	337588	25401.6	11448.5	9327.25	2515.42
A1	3	282449	72357.5	46468.3	428727	1525.53
A2	3	260814	63618.3	47440.2	402153	2003.47
A3	3	261622	60298.6	50620.2	409923	1909.74
A4	3	248476	55952.3	48523.2	370296	1536.52
A5	3	313017	73005.5	59549.6	425375	2200.97
A6	3	327118	67779	60929.4	424395	2304.65
A7	3	226977	50330.9	44189.4	324154	1689.15
A8	3	302953	65511.5	55988.3	406457	2163.59
A9	3	325869	71186.1	57480.3	420123	2098.52
A10	3	298996	70595.1	53121.1	410326	1911.23
A11	3	327303	84110.6	53736.3	447532	0
A12	3	365106	94113.4	57212.5	487210	2552.28
B1	3	256967	65016.1	45853.4	391610	2043.52
B2	3	245818	59021.7	48967.4	395915	1986.81
B3	3	264846	61198	54850.1	416183	1918.42
B4	3	227740	49676.1	51075.5	374782	9199.7
B5	3	299180	68656.8	63030.4	427781	2959.28
B6	3	316003	65861	68538.4	455501	3055.82
B7	3	210523	46870.3	43345.5	300401	2130.24
B8	3	290664	64476.2	56718.6	382865	2081.09
B9	3	290649	64653.3	56573.7	397914	1549.09
B10	3	253080	57446.7	50368.4	370325	1857.84
B11	3	305193	73355.8	54096.3	411320	1703.76
B12	3	297700	74738.1	51824.7	428055	1733.08
C1	3	325453	83114.3	58118.3	465485	2744.94
C2	3	254253	61074.6	52413.5	398375	2181.71
C3	3	274673	61830	57866.2	406260	2543.39
C4	3	204526	43106.5	50770.9	356108	2230.9
C5	3	308562	65717.2	71241.4	468441	3066.5
C6	3	313863	64324.7	70976.9	450985	3205.38
C7	3	233420	53641.9	54493.4	359405	2084.32
C8	3	299628	67992.7	64069.1	415747	1715.46
C9	3	329439	75033	66490.7	440462	1641.5
C10	3	244161	54622.8	52654.3	375393	2378.62
C11	3	303859	73742.8	56922.5	419977	2089.46
C12	3	299501	75702.3	55155.3	443694	1438.89
D1	3	355274	89861.2	65344.2	503444	2634.91
D2	3	265435	64569.3	54741.3	399666	1341.56
D3	3	325290	74893.6	66901.5	444731	2612.63
D4	3	269266	68856.8	67584.7	442480	2364.81
D5	3	361626	82968.3	83796.5	515678	4008.32
D6	3	342134	76245.8	81484.4	488681	3186.76
D7	3	282355	63444.6	66215.6	407626	2775.25
D8	3	302650	67182.4	65485.6	405415	1617.33
D9	3	308781	69089.4	65825.8	417273	2545.52
D10	3	287100	67768.4	60833.7	412843	1441.02
D11	3	289825	71366.4	58384.4	424776	598.046
D12	3	327212	84570.3	62634.7	488237	2009.54
E1	3	368355	92450.5	73881.3	576925	3053.5
E2	3	307964	80649.4	68986	497370	1878.74
E3	3	350260	82435.5	81617.7	540659	2657.81
E4	3	313363	76526.3	77623.5	484801	2483.05
E5	3	387457	88117.7	93287.6	559740	3500.82
E6	3	375781	83961.7	93885.1	548207	3806.2
E7	3	286728	66695	70754.2	429558	2263.15
E8	3	389588	91246.4	85144.5	512566	2692.93
E9	3	356374	82207.4	76194.5	475992	2295.21
E10	3	301957	70346.1	64880.4	432553	1838.87
E11	3	317944	76679.3	62883.4	446997	1426.46
E12	3	353156	89212.7	66604.7	510060	1920.92
F1	3	380247	103451	78106.5	577540	2669.44
F2	3	303652	82614.9	66861.3	483783	1557.68
F3	3	398577	100934	89966	574328	2903.63
F4	3	327137	75994.4	78690.6	497521	2282.6
F5	3	460233	102115	108912	664709	3587.28
F6	3	381217	84641.4	93395.8	554066	3162.99
F7	3	318357	75234.3	78590	479825	2187.06
F8	3	374733	87068	83997.2	510671	3268.86
F9	3	424980	99168.9	89709.9	561768	2845.06
F10	3	345429	84528.2	72955.7	494852	1840.76
F11	3	337540	83279.1	66842.6	479053	277.853
F12	3	334292	86282.9	64968.6	511306	1614.95
G1	3	361276	90084.4	73693.3	588782	2901.79
G2	3	350387	96291.3	73593.3	536145	8552.65
G3	3	419676	98355.8	90535.1	618420	3377.8
G4	3	385678	97642.6	95629.9	629410	2763.94
G5	3	460628	106017	115003	727168	3568.24
G6	3	480168	112705	119839	736798	4167.32
G7	3	337800	79472.9	76541.8	473183	2155.86
G8	3	394687	90920.8	84177.1	524300	2754.85
G9	3	445554	102570	91060.1	580272	2944.05
G10	3	349967	86382.4	71465.5	495061	1269.07
G11	3	325665	82613	64560.7	469992	1715.23
G12	3	387201	101050	72241.9	575989	1626.21
H1	3	432285	109408	78615.2	646335	3214.34
H2	3	337237	85856.4	70740.2	548926	2485.36
H3	3	434137	102590	85620.3	597192	3174.74
H4	3	304854	25267.1	13373.9	10996.8	3411.64
H5	3	434101	37958.3	21221.5	16947.1	4667.76
H6	3	387474	33564.1	18734.3	14723.8	3940.68
H7	3	330788	80499	72411.2	479908	2158.13
H8	3	400137	94761.6	85122.1	562860	2873.91
H9	3	399279	95593.2	84018.3	571598	2946.43
H10	3	282899	22713.2	11567.3	9643.78	2254.82
H11	3	294848	23149.8	11157.2	9501.21	2908.66
H12	3	334283	24975.3	11357.4	9103.39	2288.67
A1	4	283513	72068.6	46230.4	427776	1560.5
A2	4	261829	64087.2	47216.1	401645	1715.74
A3	4	262710	60872.8	50558.3	410735	1752.8
A4	4	248323	56149.5	48486.1	369916	1624.09
A5	4	314007	73257.8	59542.2	424920	2338.69
A6	4	328278	68010.5	60888.8	424501	2417.03
A7	4	226931	50671.9	44147.5	324038	1932.07
A8	4	302624	65537.8	56014.8	406118	2338.77
A9	4	326186	71429.8	57537.7	420218	2332.76
A10	4	297920	70659.9	53082.2	410397	1859.9
A11	4	326826	84395.7	53780.8	447140	0
A12	4	364000	94145.8	57047.9	484883	2040.99
B1	4	256516	65042.5	45918.6	391557	2122.11
B2	4	246828	59332.5	49078.6	396423	1850.51
B3	4	265711	61474.4	55139.8	417081	1843.88
B4	4	228812	50306.4	51154.9	375454	9554.13
B5	4	300154	69383.2	63202.7	428566	3112.63
B6	4	316940	66435.7	68647.2	456626	3029.19
B7	4	210511	47164	43543	301112	1913.09
B8	4	291137	64701.5	56868.5	382977	2021.43
B9	4	291186	65031.9	56697.9	398056	1552.38
B10	4	252960	57710.4	50291.6	370496	1981.75
B11	4	305735	73596.7	54008.4	411244	1956.24
B12	4	296764	74340.5	51793.3	426979	1541.63
C1	4	326682	83844.1	58363.1	464701	2705.6
C2	4	254431	60956.9	52516.4	398029	2390.97
C3	4	275721	62039.4	58068.8	406871	2566.8
C4	4	204412	43150.8	50983.7	356851	2530.77
C5	4	309325	66053.7	71262.9	468317	3295.64
C6	4	315003	64823.1	71220.9	452709	2981.36
C7	4	233153	53884.7	54433.7	359635	2075.29
C8	4	299768	68613.6	64130.3	416533	1600.82
C9	4	329328	75261.6	66634.8	440856	1704.32
C10	4	243815	54720.3	52686.1	376033	2252.56
C11	4	305122	74373.2	56948.7	421096	2276.34
C12	4	299079	75937.2	55281.4	443040	1728.87
D1	4	355410	89597.1	65131.8	502038	3047.77
D2	4	266025	65123.2	54916	399598	1549.89
D3	4	326668	75461.1	67140.1	445368	2696.06
D4	4	270643	69969.8	67654.4	443210	2276.97
D5	4	363187	83523.9	84218	516362	3477.64
D6	4	343015	77214.2	81406.4	489287	3405.54
D7	4	282368	63670.5	66374.9	407728	2609.23
D8	4	302854	67642.5	65534	406216	1542.07
D9	4	308877	69406.7	65922.2	417434	2559.85
D10	4	288066	68358.8	60850.6	413835	1455.12
D11	4	290018	71735.5	58462.7	425287	763.688
D12	4	326673	84357.7	62757.3	487820	2227
E1	4	367876	92521.5	74028.9	576459	2756.9
E2	4	308388	81429	69245	497010	2572.17
E3	4	351029	82865.9	81723.7	542323	2368.18
E4	4	314798	77418.1	77673.2	486410	2858.93
E5	4	388942	88915.7	93335.6	560165	3306.56
E6	4	378327	84599.3	93779.1	548816	3930.24
E7	4	286804	66903.8	70967.5	429499	2016.24
E8	4	388914	91546.6	85473.3	513105	3140.56
E9	4	356181	82478.5	76447	476331	2482.5
E10	4	302565	70830.1	64972.7	432882	2111.7
E11	4	318910	76694.3	63300.7	447119	1674.07
E12	4	352206	88873.6	66519.3	508693	1958.29
F1	4	380304	103795	77979.5	575609	3025.36
F2	4	303360	83115.4	67062.9	483835	1563.53
F3	4	398936	101408	90075.6	575131	2864
F4	4	328763	77173.3	78709.8	498721	2493.39
F5	4	461278	102190	109128	664960	3203.58
F6	4	382287	85218.8	93400.1	555665	3149.8
F7	4	318459	75316.6	78700.4	480057	2319.03
F8	4	374687	87478.6	84036.2	511004	3058.35
F9	4	425679	99685.6	89950.9	562834	2599.16
F10	4	345952	84884.6	73089.7	495704	1574.29
F11	4	338072	83231.7	66836.4	480476	519.954
F12	4	332717	85663.8	64799.8	511228	1820.37
G1	4	360603	89855.5	73318.3	586635	2996.61
G2	4	350793	96629.7	73786.7	536512	8948.94
G3	4	421646	99498.3	90840.1	620659	3259.11
G4	4	387608	97873.2	95666.4	630136	2912.99
G5	4	461552	106539	115415	727979	3655.55
G6	4	481244	113089	120167	736944	4001.59
G7	4	336763	79705	76328.6	473255	2333.34
G8	4	393984	91116.6	84342.2	524766	2383.65
G9	4	445254	103007	91304.5	580353	3136.8
G10	4	350654	87203	71810.9	496142	1210.14
G11	4	325332	82361.8	64810.4	470105	1820.39
G12	4	385531	101229	72060.5	574306	1789.08
H1	4	432531	109996	78849.1	644964	3173.56
H2	4	336147	85726.6	70801.9	546898	2120.17
H3	4	434761	102952	85663.6	596200	3468.21
H4	4	304265	25009	13373.9	11435.2	3406.94
H5	4	432744	37856.1	21062.6	16864.7	4241.81
H6	4	387127	33599.5	18656.2	14510.1	3995.2
H7	4	329604	80279.3	72535.3	479026	2333.06
H8	4	399151	94582.3	85066.5	561149	2863.7
H9	4	398447	95437.1	83837.6	570479	2693.76
H10	4	282254	22606	11594.6	9578.46	2752.46
H11	4	294049	22802.7	11095.5	9187.04	2434.29
H12	4	333072	24873.4	11338.8	8818.96	2492.39
A1	5	283341	72585.6	46217	425629	1624.61
A2	5	262748	64870.2	47412.9	401920	1996.03
A3	5	263236	60884.3	50820.1	410562	1919.55
A4	5	248667	56218.8	48523.2	369683	1591.14
A5	5	315178	73766.3	59683.5	424659	2176.67
A6	5	328445	68076.5	60997.9	424527	2405.79
A7	5	226923	50843.6	44274.6	324016	1826.7
A8	5	302536	65957.4	55911.3	405889	2331.29
A9	5	326565	71581.2	57499.5	420260	2273
A10	5	299071	71004.9	53114.1	409981	1807.57
A11	5	327912	84760.8	53653.9	446116	0
A12	5	363151	94145.8	56937.2	483240	2130.81
B1	5	257906	65398.1	45973	390515	2144.76
B2	5	248897	59866.6	49304.5	396066	2540.85
B3	5	266186	62010.1	55033.1	417176	1825.25
B4	5	229502	50873.8	51233.5	376237	9221.26
B5	5	300871	69724.1	63113.2	428820	3218.8
B6	5	317204	66933.2	68942.7	457349	2921.84
B7	5	211090	47612.6	43711.2	300382	1798.39
B8	5	291981	65357.8	57004.2	382959	2115.3
B9	5	291560	65135.3	56649.4	398217	1673.12
B10	5	252660	57979.6	50520.3	370692	1952.12
B11	5	305936	74054.5	54301.8	411593	1732.5
B12	5	296569	74298	51732.8	426940	1819.29
C1	5	327259	84284.8	58355.8	464560	2571.61
C2	5	254982	61559.6	52595.1	398383	2026.32
C3	5	276388	62509.4	58125.1	407146	2595.83
C4	5	204766	43288.6	50945.8	356941	2172.3
C5	5	310623	66416.1	71452.4	468938	2980.57
C6	5	315903	65055.9	71336.5	453141	2969.32
C7	5	233799	54126	54460	359973	2151.61
C8	5	299884	68831.9	64291.7	416984	1592.57
C9	5	330532	75771.2	66673	441176	1633.24
C10	5	243414	54681.3	52769.6	376614	2192.57
C11	5	305630	74847.9	57050.4	421809	1881.12
C12	5	299609	76320.4	55219.4	442659	1572.89
D1	5	355764	90056.1	65251.1	501875	2633.68
D2	5	266437	65457.7	54830.7	400100	1458.3
D3	5	327990	75992	67199.3	445707	2785.59
D4	5	272060	70557.6	68046.3	443688	1993.7
D5	5	364349	84251.5	84270.1	517312	3769.21
D6	5	343589	77285.1	81699.3	489613	3287.51
D7	5	282725	63966.7	66284.6	408109	2626.91
D8	5	303452	67800.4	65508.1	406463	1664.16
D9	5	309462	69598.7	66006	418114	2499.99
D10	5	288431	68876.8	61113.4	414243	1603.19
D11	5	290809	72173.3	58573.8	426049	651.976
D12	5	327496	84557.5	62848.5	487837	2053.03
E1	5	369585	93379.8	74003.6	575978	2889.48
E2	5	309284	82082.4	69133.3	497410	2212.36
E3	5	352325	83816.3	82132.5	543045	2465.09
E4	5	316107	77999.9	77986.8	487144	2669.31
E5	5	390073	89525.9	93604.9	561103	3434.71
E6	5	379752	85400.9	93962	549934	3575.7
E7	5	287047	67312.8	70839.7	429300	1982.09
E8	5	390086	92042	85560	513396	2665.46
E9	5	356490	82926.2	76550	476884	2577.06
E10	5	302384	70884.1	65150.1	433361	1756.31
E11	5	319314	76953.7	63231.4	446995	1615.75
E12	5	351560	89056.4	66410.8	508458	1943.67
F1	5	380173	104000	78002.2	574946	2559.69
F2	5	304794	83596.5	67178.4	484244	1964.95
F3	5	399905	102170	90240.6	576576	2983.94
F4	5	329795	77606.1	78879.1	498446	2531.43
F5	5	463073	102871	109284	665345	3451.16
F6	5	383282	85950.7	93465.7	555999	3159.48
F7	5	318629	75765.4	78845.7	479783	2610.7
F8	5	374784	88160	84018.2	511375	3335.65
F9	5	425568	100205	89859.8	563028	2897.9
F10	5	346615	85531.4	73186.4	496650	1771.48
F11	5	339630	83880.3	67031.6	480934	696.677
F12	5	332139	85917	64789.2	509747	1804.04
G1	5	361121	89932.9	73092.1	585600	2764.83
G2	5	350979	96531.4	73921.4	537316	10265.4
G3	5	422834	100097	90945.9	621439	3356.34
G4	5	389326	98551.2	95992.5	630688	2746.17
G5	5	462573	107045	115386	730183	3700.65
G6	5	482746	113961	120366	738203	4079.37
G7	5	337397	79823.8	76619.3	473171	2154.93
G8	5	394432	91826.1	84426.1	525116	2606.18
G9	5	445711	103521	91347	580527	3120.57
G10	5	351676	87556.5	71872.8	496443	1130.48
G11	5	326453	83083.5	64788.4	469918	1948.52
G12	5	384303	100840	72107.5	573355	1773.04
H1	5	432972	110298	78584.5	644019	3085.22
H2	5	337134	86081.4	70623.8	546131	2299.9
H3	5	436173	103730	85846.3	595515	3459.89
H4	5	303703	24957.9	13402	11287.2	3291.24
H5	5	432556	37815	21145.6	16739.5	4777.68
H6	5	386370	33453.7	18600.3	14608.9	3687.74
H7	5	329359	80742.8	72465.1	477433	2513.79
H8	5	398810	95109.1	84787.6	560127	2863.7
H9	5	398302	95319.7	83844	570056	2947.5
H10	5	281642	22538.9	11413.3	9693.09	2275.81
H11	5	293386	22841.2	11272.4	9584.09	2563.18
H12	5	332954	25197.7	11082.3	9039.16	2247.93
A1	6	284591	73360.3	46098.8	425372	1426.45
A2	6	263827	64865.6	47447.9	401833	2110.7
A3	6	263931	61257.4	50884.1	410849	2133.38
A4	6	249328	56595.4	48521.4	369476	1729.88
A5	6	315462	74133.8	59774.1	424774	2094.85
A6	6	329336	68414.5	61034.6	424961	2279.76
A7	6	227767	51001	44342.1	324480	1653.76
A8	6	303215	66170.9	55956.9	406359	2369.48
A9	6	326107	71870.6	57705.2	420758	2040.69
A10	6	299532	71133.5	53064.3	410011	1896.13
A11	6	328157	85351.3	53720.2	446043	0
A12	6	363740	94046.9	56972.6	482634	2020.26
B1	6	257989	65693.4	46084.4	390441	1960.92
B2	6	249333	60447.4	49264.4	396583	2283.77
B3	6	267584	62678.9	55133.7	417546	1499.62
B4	6	230325	51132.1	51151.5	376945	9540.33
B5	6	301923	70186.3	63369	428801	2992.14
B6	6	318658	67233.7	69023.6	457493	2780.59
B7	6	211472	47955	43655.2	300905	1981.14
B8	6	291826	65665.8	56886.5	383109	2100.19
B9	6	291899	65350.2	56660.1	398157	1641.91
B10	6	252869	58240.6	50600.7	370898	1706.09
B11	6	306273	74222.4	54285.4	411403	2041.43
B12	6	296754	74757	51715.9	426668	1595.37
C1	6	328723	84764.3	58285.2	464082	2505.23
C2	6	255684	61942.1	52588.8	398575	2226.26
C3	6	277315	63032.5	58107.3	407671	2304.6
C4	6	205197	43460.2	50976.9	357010	2334.44
C5	6	311232	66767.3	71573.1	468770	3063.81
C6	6	316549	65656	71369.4	453585	2850.48
C7	6	234399	54329.4	54655.7	359726	2307.52
C8	6	300806	69397.7	64328.4	416754	1816.08
C9	6	331157	75953	66683.6	441346	1799.37
C10	6	243648	55093.9	52902.9	376221	2494.24
C11	6	306948	75440.1	57088.6	421694	2310.04
C12	6	300105	76543.8	55130.9	442766	1828.82
D1	6	356393	90564.5	65143.7	501372	2991.08
D2	6	267205	65912.7	54923.1	399242	1580.08
D3	6	329027	76018.7	67318.6	446130	2904.62
D4	6	273030	71412.5	67971.8	444396	2086.48
D5	6	365306	84581.7	84230.8	517079	3632
D6	6	344547	77498.7	81606.1	489646	3644.48
D7	6	283310	64300.9	66383.6	408210	3081.76
D8	6	303850	68340.7	65569.9	406890	1851.48
D9	6	309868	69782.5	66104	418054	2464.58
D10	6	289848	69285.4	61334.7	414809	1403.12
D11	6	291413	72762.3	58506.2	426650	961.111
D12	6	327346	85173.8	62620.5	487444	2266.54
E1	6	370469	93612.1	74015.6	575659	2744.59
E2	6	309863	82492.3	69094.3	497485	2407.06
E3	6	353604	83971.3	82282.3	543553	2822.22
E4	6	317516	78622	78188.9	487702	2679.41
E5	6	391878	89878.6	93547.9	561592	3447.94
E6	6	380856	85939.9	94151.8	549538	3650.91
E7	6	287612	67801.2	71288	429970	1839.6
E8	6	390466	92772.8	85617.5	513913	2733.62
E9	6	357498	83620.5	76555.5	477178	2357.64
E10	6	302660	71357.4	65172.3	433831	1597.46
E11	6	319421	77717.7	63340.7	447439	1456.96
E12	6	351088	89383.1	66257.5	507319	2018.39
F1	6	381826	104634	77785.9	574441	3066.89
F2	6	304823	84060.5	67270.4	483974	1753.12
F3	6	401096	102591	90426.8	576974	3031.91
F4	6	330918	78416.3	79025	499182	2654.81
F5	6	463955	103564	109454	666573	3161.78
F6	6	384589	86253.8	93654.6	556214	3311.6
F7	6	319406	76352.3	78761.7	480109	2077.09
F8	6	374887	88763.2	84330.2	511803	3098.84
F9	6	426167	100472	90238.9	563321	2758.78
F10	6	347632	85936.7	73279	496432	1567.89
F11	6	340210	84292.2	67197.7	481128	283.983
F12	6	331846	86185.5	64838.9	509359	1719.81
G1	6	361787	90509.2	72948	585064	2749.78
G2	6	351225	96393.5	73971.3	537798	10520.6
G3	6	424356	100848	91295	622185	3077.27
G4	6	390722	99657.1	96260.4	631843	2901.15
G5	6	463422	107521	115522	729030	3458.86
G6	6	484135	114589	120321	738584	3868.27
G7	6	337586	80366.3	76671	473250	2579
G8	6	394548	92055	84392.4	524610	2749.99
G9	6	446295	103821	91395.4	580904	3040.43
G10	6	352505	88346.5	72081.3	497353	1035.55
G11	6	327896	83578.2	65273	470280	1767.21
G12	6	384393	101532	71952.2	572767	1431.27
H1	6	432972	110407	78413.7	642274	3277.2
H2	6	337079	86726.8	70551.6	544984	2407.51
H3	6	436922	104236	85681.6	595326	3284.05
H4	6	303607	24826.5	13335.4	11186.6	3358.03
H5	6	432004	37889.1	21214.5	17103.1	4387.07
H6	6	385784	33508.5	18578.2	14511.9	3775.33
H7	6	329329	80859.4	72393.9	477160	2237.38
H8	6	398358	95391.6	84749.6	559572	2913.8
H9	6	397769	95763.4	83851.4	569570	3134.86
H10	6	281425	22377.6	11479.1	9658.58	2272.11
H11	6	293462	22889.8	11209.4	9411.63	2878.09
H12	6	332074	25075.3	11429.9	9569.47	2026.5
A1	7	285568	73263.5	46124.2	424242	1803.83
A2	7	264966	65723.1	47596.6	401662	2067.17
A3	7	264412	61786.1	50952.1	410995	1876.39
A4	7	250278	56801.5	48509.1	369709	1487.96
A5	7	316896	74287.9	59725.9	425562	2141.84
A6	7	330007	68620.4	61150.9	424921	2473.22
A7	7	227938	51399	44237.6	324810	1693.98
A8	7	303565	66858.3	56162.3	406385	2362.01
A9	7	326654	72125.7	57546.4	420303	2189.14
A10	7	299943	71786.1	53088.2	409706	1828.7
A11	7	329499	85717.5	53736.3	445092	0
A12	7	364380	94713	56835	480964	1875.17
B1	7	258853	65705.2	46093.9	390474	2027.53
B2	7	250184	60898.5	49215.1	396991	2114.24
B3	7	267955	63077.4	55225.2	417698	1559.45
B4	7	231192	51443.8	51576.9	376990	9392.01
B5	7	302965	70850.8	63407	429024	3055.34
B6	7	318552	67761.3	69007.5	458032	2936.37
B7	7	211649	48032.8	43736.7	300989	1924.56
B8	7	292600	65892.7	57016.8	383414	2046.89
B9	7	292422	65777.6	56746.4	398082	1625.48
B10	7	252860	58296.2	50567.6	371178	2006.9
B11	7	306969	74831.5	54380.5	411347	1738.65
B12	7	296343	74943.4	51678.9	426305	1896.53
C1	7	329855	85399.5	58480.1	463773	2883.84
C2	7	256393	62448.9	52571	398194	2227.29
C3	7	278096	63362	58134.5	407493	2347.68
C4	7	205744	43733.8	51065.4	357028	2152.76
C5	7	312369	67397	71488.2	468938	2922.39
C6	7	317472	65904.5	71504.2	454043	3153.19
C7	7	234922	54790.8	54577	359605	1801.21
C8	7	301566	69880.7	64506.1	416338	1702.26
C9	7	331717	76481.7	66744.7	441391	1679.52
C10	7	243798	55072.7	52928.7	376791	2388.18
C11	7	307709	75995.1	57316.1	421924	1918.91
C12	7	300730	77131.9	55165.2	443025	2107.81
D1	7	357214	90942.1	65171.1	500509	2824.71
D2	7	267352	66511.9	54911.9	399142	1408.99
D3	7	329832	76829.4	67434.9	445694	2489.53
D4	7	274406	72107.5	68035.7	444658	2224.66
D5	7	366466	84968.9	84434.2	517689	3772.24
D6	7	345184	78015.6	81846.7	490351	3372.92
D7	7	283911	64671.2	66476.9	408424	2702.55
D8	7	304207	68629	65673.3	406808	2024.59
D9	7	310152	70161.5	66160.2	418218	2477.22
D10	7	290842	69755.8	61381.6	414998	1468.34
D11	7	293045	73464.1	58526.5	426453	571.081
D12	7	328265	85901.9	62793.8	487075	2293.23
E1	7	371473	93907.3	73925.2	575603	2780.13
E2	7	310378	83272	69095.4	496901	2144.04
E3	7	354624	84607.4	82148.5	544040	2364.92
E4	7	319086	79267.3	78249.7	487331	2572.81
E5	7	393397	90634.7	93596.9	561060	3407.25
E6	7	381745	86565.5	94160.6	550494	3668.49
E7	7	288704	68271.7	71111	430134	1742.99
E8	7	391337	93680.1	85664.9	514317	3007.29
E9	7	357712	83925.3	76668.5	477320	2436.6
E10	7	302621	71626.4	65245.9	434013	1501.43
E11	7	320010	77699.8	63409.1	447167	1988.07
E12	7	351714	89779.6	66368.5	506334	2059
F1	7	381393	104375	77932.6	574009	2920.07
F2	7	306024	84233	67365.9	483412	1880.69
F3	7	402105	102900	90502.3	576969	2882.77
F4	7	331309	79147.7	78925.7	498406	2779.22
F5	7	464922	104230	109297	666026	3296.83
F6	7	385889	86902.1	93729.8	556720	3323.03
F7	7	320698	76664	78767.4	480061	2287.47
F8	7	375934	89217.8	84178.2	511327	3179.8
F9	7	427914	101697	90300	564103	2736.13
F10	7	348568	86507	73374.7	496947	1971.86
F11	7	341259	85105.3	67273.5	480657	319.736
F12	7	333145	86640.2	65014.8	508417	1870.22
G1	7	362107	91301.3	72958.9	583808	3074.88
G2	7	350985	96919.6	74099.8	537457	11699.6
G3	7	425211	101504	91361.8	622518	2933.32
G4	7	392425	100327	96113.6	632012	2937.67
G5	7	464632	107909	115671	729275	3791.8
G6	7	485552	115281	120610	739641	4030.29
G7	7	338297	80692.9	76737.4	473260	2336.14
G8	7	394924	92133.5	84550.6	524772	2925.88
G9	7	445948	104050	91634.8	581257	2889.27
G10	7	354715	89229.3	72169.3	496995	1101.02
G11	7	328735	84294.8	65263.2	470709	1849.4
G12	7	385137	101644	71926.2	571471	1910
H1	7	434221	110391	78248.1	641114	3046.15
H2	7	338176	87018.6	70469	544378	2540.31
H3	7	437260	104234	85948.4	595596	3420.68
H4	7	303485	24989.1	13388.8	11471.3	3474.67
H5	7	431492	37644.8	21024.6	16836.8	4662.85
H6	7	386097	33519.9	18579.1	14674.4	3957.66
H7	7	329601	81354.6	72444.9	476612	2121.4
H8	7	399390	95778.2	84897.9	558795	2770.94
H9	7	398213	96087.5	83517.6	568505	2871.48
H10	7	281384	22408.6	11368.6	9555.04	2737.64
H11	7	293582	23124.1	11257.7	9371.53	2450.23
H12	7	332789	25008	11335.1	9255.69	1950.33
A1	8	285375	73435.8	46154.1	423803	1547.39
A2	8	265386	65812.5	47566	402186	1862.26
A3	8	265370	61794.4	51007.9	411231	1906.8
A4	8	249929	56980.9	48538.2	369505	1413.39
A5	8	316995	74781.1	59694.9	425434	2295.75
A6	8	330337	68727.6	61160.4	425044	2368.87
A7	8	228315	51664	44524.6	324366	1707.65
A8	8	304150	66867.4	56097.7	406687	2512.28
A9	8	327733	72139	57783.6	420799	2362.65
A10	8	301063	72292	53216.8	409936	2022.94
A11	8	329663	86236.4	53810.6	445118	0
A12	8	364078	94896.9	57020.9	480296	2447.26
B1	8	258542	65993.2	45880.6	390180	2076.82
B2	8	250606	61170.8	49491.4	396823	2083.21
B3	8	268804	63493	55536.4	417864	1353.49
B4	8	231780	51860.1	51508.8	377246	9505.84
B5	8	303319	71176.8	63426.5	428779	2925.57
B6	8	319692	68190.8	69122.8	458073	2916.19
B7	8	212196	48421.1	43705.3	301256	1910.79
B8	8	292892	66084.6	57216.1	383332	2213.15
B9	8	292635	66199.4	56995.5	398312	1618.09
B10	8	253663	58420	50631	370608	1972.77
B11	8	307286	74849.2	54271.1	410969	1969.58
B12	8	297056	75108.6	51625.1	426178	1593.13
C1	8	329835	85606.9	58665.2	463578	2832.21
C2	8	256997	62736.6	52732.6	397924	2412.73
C3	8	278453	63836.7	58213.3	407351	2604.26
C4	8	205964	43800.8	51239.4	357316	2256.3
C5	8	312796	67992.1	71868.1	468780	2858.84
C6	8	317826	66357.1	71350.9	454542	2992.6
C7	8	235326	55257.5	54610.4	359551	2079.39
C8	8	302179	70219.5	64446.6	417075	1957.11
C9	8	332509	76789.7	66897.8	441297	1723.33
C10	8	243798	55196.4	52902.1	376889	2564.66
C11	8	308502	76585.3	57308.1	421914	1989.38
C12	8	300426	77672.5	55225	442594	1497.11
D1	8	357823	91128.4	65302.5	500063	3047.77
D2	8	268706	66693	54998.2	398744	1440.19
D3	8	331147	77578.8	67390.8	446287	2780.5
D4	8	275097	72984.3	68186.6	444801	2277.95
D5	8	366683	85450.9	84562.9	517470	3743.99
D6	8	346049	78127.8	81798.2	490382	3133.98
D7	8	284356	65001.7	66452.6	408846	2550.28
D8	8	304142	69138.5	65754.2	406942	1630.71
D9	8	309848	70439.2	66364.7	418809	2532.03
D10	8	291260	70219.1	61325	415241	1402.24
D11	8	293822	73666.4	58860.8	426617	749.243
D12	8	328916	86010.3	62832.3	487157	1917.61
E1	8	371818	94686.3	74023.6	574954	2499.93
E2	8	311264	83209.4	69210.4	497782	2482.21
E3	8	355176	84979.7	82385.1	544143	2489.04
E4	8	319637	79928.4	78339.1	486981	2838.74
E5	8	393826	91143.8	93723	561592	3093.99
E6	8	382501	86879.6	94294.9	550122	3796.44
E7	8	289057	68591	71175.9	429963	2198.74
E8	8	392735	94167.7	85726.4	514075	2922.85
E9	8	358612	84723.3	76985.8	477428	2656.94
E10	8	302544	71860	65178.5	433699	2187.08
E11	8	320105	78119	63462.8	447068	1598.71
E12	8	351709	89920.8	66429	507096	1888.43
F1	8	382083	104736	77925	574609	2838.5
F2	8	306006	84417.7	67400.1	484233	1831.54
F3	8	402600	103165	90764.1	577086	2681.48
F4	8	332784	79640.5	79042.2	498788	2452.26
F5	8	466179	104690	109383	666068	3282.89
F6	8	386342	86860.7	93886.3	556195	3509.45
F7	8	320834	77504.1	78899.5	480519	2169.85
F8	8	376300	89579.5	84279.2	510812	3213.2
F9	8	428135	102146	90384.6	563355	2522.59
F10	8	348544	86897.4	73406.6	496936	1390.96
F11	8	342183	85600.1	67303.6	480889	277.853
F12	8	332639	86344.1	64937.5	509716	1798.88
G1	8	361872	91411.7	73109.2	583450	3079.39
G2	8	352166	96933.7	73894	537400	13014.8
G3	8	426258	101920	91368.1	622987	3404.32
G4	8	393617	100933	96492	630104	2922.86
G5	8	465823	108622	115883	729223	3553.85
G6	8	486801	116041	120611	739392	4020.11
G7	8	338729	80966.4	76681.1	472876	2293.17
G8	8	395051	92500.5	84490.8	523921	2818.99
G9	8	446214	104237	91481.3	580236	2956.22
G10	8	355817	89731.3	72162.8	496757	1134.85
G11	8	329358	84802.2	65290.2	470758	2209.61
G12	8	385420	102814	71872.7	571377	2006.24
H1	8	433096	111369	78396.7	639261	2784.51
H2	8	337831	86943.1	70455	543263	2281.59
H3	8	437994	104691	85944.8	595493	3371.97
H4	8	302995	25036.4	13412.3	11178.1	3474.67
H5	8	431313	37697.8	21108.6	17371.4	4811.05
H6	8	385125	33420.1	18707.7	14697.7	3821.81
H7	8	330102	81559.8	72474.7	476719	2284.74
H8	8	399338	96228	84688.5	558317	2876.69
H9	8	398470	96371.8	83729.2	567920	2623.09
H10	8	280798	22508	11413.3	9718.97	2403
H11	8	291882	23181.2	11224.2	9273.94	2906
H12	8	331323	25201.7	11242.2	8787.77	2081.42
A1	9	286137	74222	46300.7	422850	1897.08
A2	9	265978	66124.4	47629.4	401507	1982.23
A3	9	265943	62156.2	50788.7	411186	2046.08
A4	9	250115	57136.4	48644.4	369571	1428.99
A5	9	318076	74888.1	59906.4	425430	2073.79
A6	9	330861	68905.5	61072.8	425266	2121.63
A7	9	228491	51920.3	44393.6	324634	1921.61
A8	9	303916	67071.8	56110.1	406452	2507.3
A9	9	326776	72889.2	57747.3	420503	2144.79
A10	9	301673	72693.8	53319.5	409886	1986.71
A11	9	330483	87085.8	53783.1	444593	0
A12	9	364624	95304.8	56610.7	479284	2443.11
B1	9	258258	66469.2	46108.8	390157	2150.09
B2	9	251391	61651.1	49255.2	396264	2181.83
B3	9	268948	63763.3	55398.1	417859	2057.69
B4	9	231988	52088.6	51579.5	377217	9529.12
B5	9	304557	71502.9	63417.2	429154	2938.21
B6	9	319961	68259.6	68963.5	458269	2899.24
B7	9	212160	48813.6	43833.9	301019	1877.91
B8	9	293337	66460.2	57169	383458	2112.12
B9	9	292622	66370.3	56907.5	398213	1602.48
B10	9	253503	58308.8	50465.8	370790	2033.83
B11	9	307251	75371.7	54560.4	411767	1837.18
B12	9	297405	75357.6	51749.6	425733	1903.25
C1	9	330616	86008.7	58365.6	461828	2590.05
C2	9	257682	62610.2	52749.4	397634	2058.43
C3	9	279652	63987.4	58220.9	407114	2096.71
C4	9	206194	43715.9	51007.1	357792	2309.04
C5	9	313456	67973.9	71549.8	468765	3104.99
C6	9	318608	66565.1	71724.2	453859	2846.46
C7	9	235757	55573.2	54526.8	359332	1946.46
C8	9	302679	70579.6	64427.8	416313	1665.15
C9	9	333841	77680.3	66947.4	441031	1817.55
C10	9	243249	55541.3	52885.7	376634	2143.01
C11	9	309026	76962.7	57205.4	421705	2237.54
C12	9	301431	77626.2	55198.4	442762	1411.43
D1	9	358241	91745.4	65339.5	499535	2861.68
D2	9	268811	66918.5	55033.7	398413	1681.73
D3	9	331091	77786.5	67465.9	446194	2805.93
D4	9	275695	73275	68412.1	444729	2294.73
D5	9	367882	85819.8	84580.5	517924	3707.67
D6	9	346449	78654.6	81882.8	490401	3364.28
D7	9	284720	65267.4	66542	408384	2745.78
D8	9	304564	69187.9	65840.2	406705	1808
D9	9	310658	70665	66256.6	418145	2444.34
D10	9	292309	71057.5	61449.8	414952	1660.48
D11	9	294854	74051.1	58578.7	426446	630.789
D12	9	329619	86495.7	62845.5	487123	2374.28
E1	9	373356	95205.6	74099.4	575110	2884.01
E2	9	311847	83561.3	69386.7	497019	2109.88
E3	9	356237	85283.5	82205.3	544594	2396.49
E4	9	320135	80312.4	78367.8	487049	2821.91
E5	9	394721	91700.6	93956.2	561401	3461.16
E6	9	383361	87491.4	94497.3	549404	3733.93
E7	9	289987	69154.9	71193.6	430154	2283.64
E8	9	393472	94683.7	85724.4	513547	2774.31
E9	9	359462	85052.6	76699.5	477131	2686.32
E10	9	302657	71895.4	65409.2	433809	2016.57
E11	9	320443	78306	63267	446366	1533.22
E12	9	352169	90026.8	66315.5	505663	1901.43
F1	9	382097	104844	78135.2	573533	2509.27
F2	9	306038	84869.6	67322.3	483407	2107.73
F3	9	403426	103814	90540.7	577415	2900.5
F4	9	333415	80135.4	79009.8	498505	2598.26
F5	9	467161	105106	109500	666307	3259.31
F6	9	386651	87552.9	93989.5	555881	3565.73
F7	9	321139	77866.1	78740	480925	2620.27
F8	9	376647	90181.8	84298.2	510954	3088.72
F9	9	429118	102539	90346	563877	2664.95
F10	9	349710	87201.7	73378.9	496421	1751.22
F11	9	342456	86094.8	67454.2	480790	454.576
F12	9	333051	86815.1	64927.8	507804	2232.06
G1	9	363777	91994.6	72979	582735	2949.96
G2	9	351668	97129.1	74058.7	537793	13552.2
G3	9	426851	102178	91393.3	622725	3026.76
G4	9	394909	101901	96316.6	632182	2564.54
G5	9	466397	109141	115816	730205	3851.28
G6	9	487916	116904	120690	739496	4083.99
G7	9	338570	81271.4	76912.7	472816	2455.7
G8	9	394403	92913.9	84438.7	524337	2580.91
G9	9	446761	104869	91569.1	580384	2912.6
G10	9	357303	90286.7	72233.4	497246	1248.33
G11	9	329948	85303.3	65509.2	470828	1845.78
G12	9	386200	102705	71729.2	570733	1895.19
H1	9	433904	111353	78553.7	638371	2618.02
H2	9	337876	87591	70470.1	543251	1966.77
H3	9	438511	105071	85571.1	594570	3615.54
H4	9	302643	25131.9	13452.5	11033.9	3296.89
H5	9	430534	37850.1	20933.7	17377.4	4421.42
H6	9	384467	33818.5	18594.1	14733.6	3730.64
H7	9	329544	81808.4	72297.8	476256	2270.24
H8	9	400222	96713	84846.9	557617	2843.29
H9	9	398107	96725	83727	567979	2974.27
H10	9	280635	22142.7	11491.6	9603.11	2475.85
H11	9	291578	22899.8	11197.4	9348.8	2508.7
H12	9	330999	25024.3	11478.3	9341.93	1557.08
A1	10	286175	74876.8	46231.9	422455	1946.62
A2	10	266812	66674.6	47379	401402	1643.54
A3	10	266213	62625.8	50948	411231	1904.84
A4	10	250639	57518.4	48622.2	369716	1423.79
A5	10	317996	74994.4	59886.8	425529	2371.9
A6	10	331235	69026.7	61051.3	425152	2380.91
A7	10	229034	52137.9	44461.9	324650	1537.93
A8	10	304306	67316.6	56231.8	406531	2300.58
A9	10	327859	72989.1	57535.8	420491	2345.3
A10	10	302940	72992.3	53212.8	409417	2043.07
A11	10	331800	87329.2	53794.6	444029	0
A12	10	365527	95100.8	56705.8	477867	2556.42
B1	10	259766	66525	46231.1	389799	1984.9
B2	10	252243	61793.6	49171.5	396503	2140.83
B3	10	270372	63832.9	55513	417857	1683.03
B4	10	232750	52341.7	51575.2	377420	9597.25
B5	10	304692	71786.8	63376.6	428456	3358.68
B6	10	320404	68723.8	69058	458044	2949.28
B7	10	212539	48879.1	43658.9	300405	1842.74
B8	10	292959	66886.6	57318.9	383779	2168.6
B9	10	292993	66487.6	56961	398135	1749.51
B10	10	253544	58479.2	50500.6	370978	1997.92
B11	10	307722	75396.7	54494.9	411714	2020.9
B12	10	297105	76055	51563.5	425648	2099.18
C1	10	330563	86315.9	58382.6	461854	2706.83
C2	10	257675	63328.4	52684.3	397566	2463.49
C3	10	280090	64246.2	58525.8	407287	2344.87
C4	10	206201	44109.3	51107.2	357795	2338.35
C5	10	314053	68305.2	71526.6	468832	3131.84
C6	10	318433	66898.9	71656	453978	3070.49
C7	10	236453	55972.4	54523.6	359481	2158.17
C8	10	303900	71013.8	64395.2	417138	1816.9
C9	10	334129	77864.4	66960.5	441079	1840.7
C10	10	244024	55761.6	52855.6	376415	2178.66
C11	10	309508	77108.2	57399.7	422172	2061.88
C12	10	302171	78032.5	55201.7	442599	1617.93
D1	10	359226	91876.2	65198.6	498707	3009.57
D2	10	269488	67169.7	54973.8	398481	1666.63
D3	10	331472	78102.8	67607.3	445460	2446.8
D4	10	276639	73782	68362.8	444912	2413.17
D5	10	368232	85763.7	84720.1	517506	3647.14
D6	10	347023	78841.3	81763	490168	3375.8
D7	10	284662	65718.3	66438.1	407964	2241.81
D8	10	304450	69383.1	65670	406362	1681.72
D9	10	310011	70900.7	66373.9	418385	2414.83
D10	10	292809	71391.9	61434.7	415075	1665.77
D11	10	295174	74707.9	58922.6	426493	1021.78
D12	10	330094	87153.9	62828.3	487375	2313.98
E1	10	373954	95559.5	73905.2	574678	2627.05
E2	10	312061	84194.6	69507.2	496410	2300.03
E3	10	357256	85386.9	82224.5	545042	2448.76
E4	10	321415	80590.7	78372.2	487857	2343.92
E5	10	395594	92056.2	93943.2	561560	3112.3
E6	10	383471	88043.3	94326	549336	3849.18
E7	10	290275	69464.8	71211.3	429209	2269
E8	10	394527	95111.3	85975.5	513648	2772.28
E9	10	360386	85439.4	76853.6	477537	2583.49
E10	10	303269	71829	65396.8	433537	1778.74
E11	10	320339	78696.9	63290.6	446785	1505.4
E12	10	351716	90284.6	66260.8	506436	1959.1
F1	10	382644	105282	78089.9	572889	2823.67
F2	10	306462	84824.6	67303.4	483185	1739.08
F3	10	403898	104050	90565.1	577076	2992.28
F4	10	334333	80353.2	79232.8	498768	2585.92
F5	10	467488	105311	109296	665464	3616.22
F6	10	387181	87712.5	93893.3	555614	3505.94
F7	10	322565	78274.8	78825.9	480286	2429.01
F8	10	377511	90664.7	84166.2	510605	3214.21
F9	10	430281	103240	90604.1	563770	2462.19
F10	10	350275	87293.1	73412.9	496698	1640.37
F11	10	343707	86514.3	67125.1	480740	650.708
F12	10	333174	87153.3	64904.7	508032	2028.36
G1	10	363707	92299.3	73048.8	582456	2648.94
G2	10	351533	96881.3	73988.8	537251	14878.5
G3	10	428023	102875	91417.2	623152	3225.01
G4	10	396806	102617	96610.2	632329	2734.32
G5	10	467181	109981	115834	729107	3668.99
G6	10	489979	117257	120796	739085	4010.85
G7	10	339252	81489.2	76739.3	472510	2382.84
G8	10	394851	93051.1	84452.2	523401	2997.78
G9	10	446952	105062	91516.6	579424	3117.53
G10	10	358043	91071.3	72273.5	497396	1170.86
G11	10	331192	86111.7	65385.6	470742	1967.86
G12	10	386683	103314	72034.4	569181	2218.46
H1	10	434212	111964	78147.4	637860	3005.37
H2	10	338189	87453.8	70361.9	542236	2247.24
H3	10	437957	105372	85858.3	594568	3328.01
H4	10	302375	24989.1	13370.1	11339.4	3556.5
H5	10	430259	37770	21179.5	17166.7	4438.1
H6	10	384211	33486.4	18606.6	14613.3	3852.2
H7	10	330562	82340.3	72382.4	475365	2022.82
H8	10	400549	96994.6	84694	556764	2960.18
H9	10	399253	96857.5	83551.7	567492	2653.07
H10	10	280450	22270.5	11694	9723.9	2500.55
H11	10	291444	22927	11221.5	9564.04	2717.31
H12	10	331206	25026.3	11448.5	9244.68	2272.73
A1	11	287233	74857.1	46157.1	421501	1802.37
A2	11	267775	66624.2	47723.4	401314	1894.11
A3	11	265978	62533.5	51077.9	410989	1657.66
A4	11	251221	57493.5	48491.4	369384	1257.31
A5	11	318402	75067.4	59773.3	425622	2131.31
A6	11	331059	69004.1	61321.3	425131	2361.64
A7	11	228731	52140.3	44453.9	324276	1918.39
A8	11	304796	67237.5	56196.2	406340	2308.05
A9	11	327785	73123.4	57607.6	420611	2632.55
A10	11	303751	73280.6	53491	409533	2215.17
A11	11	331983	87442.5	53792.3	444535	0
A12	11	365512	95629.3	56614.9	477170	2704.28
B1	11	259740	66776.3	46175.4	389303	2179.4
B2	11	252368	61907	49388.2	396380	2086.53
B3	11	270758	64342.4	55505.9	417997	1804.65
B4	11	232415	52476.8	51423.3	377750	9596.39
B5	11	305009	71720.8	63504.2	428960	3122.75
B6	11	320657	68732.3	69103.6	458319	3050.98
B7	11	212522	49029.6	43768.1	300482	2275.52
B8	11	293346	66740.1	57259.3	383406	2139.17
B9	11	293323	66748.1	56902.6	397996	1995.09
B10	11	253234	58878.4	50607.8	370425	2028.45
B11	11	307859	75419.6	54416.2	411783	2164.59
B12	11	297697	75821.3	51831.4	426255	2130.52
C1	11	331605	86595.9	58221.8	461346	2858.03
C2	11	258132	63120.2	52680.1	397727	2476.96
C3	11	280326	64336.5	58386	407499	2428.21
C4	11	206214	44015	51134.4	356971	2560.07
C5	11	314215	68622.6	71666.1	468057	3030.7
C6	11	318750	66912.9	71595	454123	3194.14
C7	11	236953	56187.9	54780.7	359288	2178.69
C8	11	304182	71344.7	64525.6	416415	1672.57
C9	11	335146	78088.3	66922.2	440908	1932.44
C10	11	243767	55692.9	52968.3	376708	2383.83
C11	11	310176	77535.8	57289.9	421754	1790.23
C12	11	302381	78508.2	55353.3	442534	1850.79
D1	11	359394	91898.4	65189	499131	2902.35
D2	11	269953	67462	55085.5	398060	1490.51
D3	11	332431	78390.5	67379.7	446106	2468.16
D4	11	277186	74282.6	68246.6	445087	2359.87
D5	11	368496	86117.8	84520.6	517690	3600.73
D6	11	347865	78994.8	82079.7	490175	3583.06
D7	11	284436	65776.6	66617.8	408291	2633.79
D8	11	304909	69406.6	65740.1	406330	1475.17
D9	11	310295	71031.7	66257.4	418487	2386.16
D10	11	292879	71595.8	61476.3	416311	1671.94
D11	11	295618	74923.8	58876.3	425929	1100.75
D12	11	330394	87106.7	62722.9	487023	2128.15
E1	11	373486	96067.9	74066.1	574740	2964.65
E2	11	312493	84344.2	69266.2	496114	2197.56
E3	11	357248	85686.4	82331.6	544342	2309.39
E4	11	322158	81306.8	78625.2	486826	2600.87
E5	11	396502	92184.9	93938.2	560977	3538.46
E6	11	384503	88125.3	94528.5	549610	3812.06
E7	11	290973	69636.7	71186.7	429591	2129.45
E8	11	394989	95847.1	85767.8	513218	2601.36
E9	11	360587	85761.5	76792.5	477485	2320.92
E10	11	302934	72007.8	65383.5	433558	1816.43
E11	11	320556	78622.7	63276.1	445896	1524.24
E12	11	351726	90283.8	66360.2	505587	1722.74
F1	11	382756	105280	78284.9	572961	2684.27
F2	11	307005	84944.9	67292.8	482922	1641.94
F3	11	404601	104246	90676.9	577014	2900.5
F4	11	335039	80610.5	79211.5	498951	2678.46
F5	11	468431	105848	109650	666095	3534.76
F6	11	387817	87861.9	93653.7	556876	3346.78
F7	11	322974	78650.5	78903.3	480150	2319.03
F8	11	378249	90825	84320.2	509901	3369.05
F9	11	431123	103719	90315	563393	2799.76
F10	11	350506	87771.9	73466.1	496577	1434.66
F11	11	344562	86660.6	67157.2	480117	501.566
F12	11	333625	87174.3	64775.8	507195	2171.89
G1	11	364843	92880.6	72810.2	582084	2698.61
G2	11	351445	96673.2	74038.7	536695	15385.2
G3	11	428626	103040	91819.2	623498	3256.58
G4	11	397760	102885	96544.2	632338	2991.96
G5	11	468334	110176	115902	727970	3783.16
G6	11	490936	117924	120685	740246	4162.69
G7	11	338737	81810.4	76766.9	472735	2590.21
G8	11	394760	93200.5	84414.6	523362	2704.32
G9	11	445999	104883	91470.2	579660	3148.98
G10	11	358622	91406.3	72335.4	496782	1243.97
G11	11	332859	86489.1	65295.1	470882	1917.09
G12	11	387629	103707	71712.2	569035	1945.78
H1	11	434967	112083	78215.7	636765	3008.77
H2	11	338255	87578.6	70435.2	542134	2028.59
H3	11	438824	105356	85762.1	594834	3551.38
H4	11	302207	25130	13463.8	10911.5	3364.61
H5	11	430612	37822	21066.6	16811	4787.5
H6	11	384273	33432.5	18791.1	14679.8	3898.67
H7	11	330470	82484.8	72333.4	475412	2331.13
H8	11	400733	97181.4	84626.4	556408	2914.72
H9	11	399353	97114.8	83587.8	566702	3019.23
H10	11	280156	22527.3	11705.1	9646.25	2437.57
H11	11	291691	22865.5	11149.1	9462.44	2968.45
H12	11	331269	25283.3	11160.4	9424.51	2458.73
A1	12	287398	75026.2	46038.9	421359	1018.48
A2	12	268349	66804.2	47607.5	401317	1594.7
A3	12	266556	63204.2	51041.4	411244	1876.39
A4	12	251491	57555.7	48774.3	369167	1700.4
A5	12	318796	75284.8	60006.8	425049	2555.79
A6	12	332074	69377.1	61130.2	425742	2348.8
A7	12	229420	52173.5	44429.7	324611	1743.85
A8	12	304144	67357.8	56245.9	406316	2126.23
A9	12	328631	73148.1	57820.9	420091	2655.69
A10	12	304123	73878.7	53510.9	409673	1909.22
A11	12	332982	87937.6	53721.4	443938	0
A12	12	365863	95703.5	56558.2	475630	2028.56
B1	12	260526	66905.6	46006.9	389402	2313.94
B2	12	252677	62439.9	49320.6	395726	2014.51
B3	12	271113	64508.8	55694	417813	1584.95
B4	12	233190	52797.9	51535.5	377246	9674
B5	12	305633	72049.3	63511.8	428270	3127.8
B6	12	321209	68849	69049.2	458015	3063.09
B7	12	212717	49184.4	43753.1	300762	2125.65
B8	12	293599	67187.8	57342.5	383047	2099.39
B9	12	293374	66648.8	56965.9	397755	1675.58
B10	12	253446	58882	50564	370351	1703.39
B11	12	308352	75931.7	54552.2	411151	1796.13
B12	12	296840	75801.3	51709.2	425957	1806.97
C1	12	332268	86505.1	58190.2	461270	2403.2
C2	12	258259	63403.6	52583.6	397292	2237.65
C3	12	281216	64723.7	58310.9	406974	2439.45
C4	12	206403	44013.1	51141.2	357516	2136.16
C5	12	314506	68562.9	71582	468377	2994.89
C6	12	319147	67131.8	71546	454063	2900.26
C7	12	237440	56354.1	54616.7	358484	2108.11
C8	12	304958	71697.8	64617.8	416318	1585.97
C9	12	335537	78536	66950.7	440633	1400.15
C10	12	243915	55716.7	53017.4	376798	2358.62
C11	12	310811	77793.8	57376.5	421566	2061.88
C12	12	303235	78687.7	55353.3	442992	1769.51
D1	12	359005	91755.3	65245.2	498662	2819.78
D2	12	270187	67706	54872.3	397392	1540.83
D3	12	332508	78571.5	67645.4	445441	2821.19
D4	12	278053	74608.7	68547.6	445146	2368.76
D5	12	369128	86359.7	84629.7	517744	3803.52
D6	12	347573	79114.1	82074.9	489914	3644.48
D7	12	285156	66007.1	66696.5	407917	2597.44
D8	12	305033	69732.2	65742.6	406140	1663.33
D9	12	310324	71202.3	66216.4	418658	2462.05
D10	12	293986	71803.2	61463.9	415795	1717.77
D11	12	296770	75194.7	58856.9	426511	912.959
D12	12	331786	87683.3	62887.1	487083	2293.23
E1	12	374856	96245.6	74142	574812	3229.82
E2	12	312385	84402.3	69294.1	495839	2354.69
E3	12	358387	86253.9	82717.9	544517	2545.66
E4	12	322173	81467.6	78557.8	486726	2559.35
E5	12	397322	92775.1	93982.3	560619	3119.41
E6	12	385439	88439.5	94579.1	549310	3629.42
E7	12	291709	70077	71127.8	430272	2240.7
E8	12	395883	95949.1	85792	513411	2858.75
E9	12	361439	86279.2	76997.6	476797	2232.78
E10	12	302708	72185.6	65419.8	433622	1855.03
E11	12	320516	78862.3	63321.6	446115	1587.94
E12	12	351450	90614	66463.8	504732	2268.56
F1	12	382061	104975	78030.9	572199	2957.14
F2	12	307403	85296	67251.5	482747	2210.72
F3	12	404375	104583	90805.6	576906	3099.71
F4	12	335935	81332	79222.6	498123	2592.09
F5	12	468102	106542	109422	665765	3701.96
F6	12	387979	88180.1	93853.1	555144	3390.74
F7	12	323461	78638.6	78789.1	480028	2229.14
F8	12	378763	91380.3	84416.2	509868	2922.74
F9	12	431570	103921	90412.4	563276	2971.24
F10	12	350834	87863.4	73519.3	495825	1674.48
F11	12	345172	87010.1	67414.7	480765	564.901
F12	12	333695	87382.6	64970.4	506908	2160.72
G1	12	364499	92780.1	72876.8	582149	2883.73
G2	12	352100	96783	74158.5	537030	16520.1
G3	12	428834	103291	91741.1	623020	3427.05
G4	12	399249	103510	96625	632320	2572.43
G5	12	469544	110864	115898	730415	3319.74
G6	12	492645	118587	120774	738054	4219.17
G7	12	339128	81969.6	76847.2	472381	2546.31
G8	12	394722	93388.8	84236	522819	2884.09
G9	12	446462	104758	91435.8	579170	3084.05
G10	12	359514	91850.4	72425.6	497372	1107.57
G11	12	333463	87284.7	65516.6	470287	2050.06
G12	12	388177	104022	71905.3	568975	1971.69
H1	12	434641	112401	78217.4	635311	2964.6
H2	12	338833	88047.2	70435.2	541605	2501.39
H3	12	439167	105525	85693.6	594353	3570.39
H4	12	302360	25051.5	13379.5	11481.7	3434.22
H5	12	429886	37571.6	21003.6	16889.5	4539.19
H6	12	384140	33543.8	18755.6	14734.5	3981.79
H7	12	331346	82607.2	72314.1	474918	2291.5
H8	12	401621	97670.2	84590.3	555845	2769.08
H9	12	399144	97330.2	83568.7	566596	2808.31
H10	12	280433	22529.9	11568.5	9786.76	2635.15
H11	12	291348	23122.7	11118.3	9382.22	2770.46
H12	12	331343	25315.9	11257	9255.69	2311.7
A1	13	287687	75004.9	45971.6	420423	1462.88
A2	13	268371	67357.9	47722.3	401756	2082.03
A3	13	267408	63055.9	50941.9	410977	1755.74
A4	13	251581	57772.4	48762	368709	1580.74
A5	13	318910	75289.6	59827.2	425715	2286.03
A6	13	331867	69624.1	61068	424558	2411.41
A7	13	229250	52350.7	44496.5	324410	1878.98
A8	13	305057	67770.7	56223.6	406556	2197.63
A9	13	328822	73540.4	57640.1	419686	2192.03
A10	13	305755	74102.3	53459.1	409256	1822.66
A11	13	334092	88413.6	53921.4	443561	0
A12	13	366704	96420.6	56397.8	475170	2356.05
B1	13	260366	66539.7	46013.7	389101	2243.34
B2	13	252784	62598.8	49443.3	396014	2078.78
B3	13	271605	64665.2	55522.1	417543	1858.59
B4	13	233425	53057.9	51618.3	377547	9423.05
B5	13	306117	72246.6	63546.4	428530	3167.4
B6	13	321103	69286.2	69273.4	458285	2931.53
B7	13	212735	49231.7	43919.9	300153	1885.56
B8	13	293961	67375.9	57391.1	383046	1997.56
B9	13	293536	67143.7	56857.4	397715	1536.77
B10	13	253829	58888.3	50587.3	370182	1849.76
B11	13	308124	75881.6	54465.3	411514	1940.85
B12	13	297090	75896.9	51735	425629	1496.85
C1	13	331946	86773.4	58400.9	460363	2468.35
C2	13	258311	63628.1	52677	397114	2303.95
C3	13	281154	65061.5	58329.7	407686	2511.55
C4	13	206109	44419.7	51181	357358	2320.77
C5	13	315032	68825.9	71571.3	467959	3126.47
C6	13	319888	67272.4	71712.9	454534	3288.89
C7	13	237675	56669.1	54646.2	358995	2029.34
C8	13	305050	72279.3	64510.1	415871	1695.66
C9	13	336319	78882.1	67049.2	440591	1928.31
C10	13	244061	55787	52937.3	376565	2196.92
C11	13	310965	78005.6	57239.6	421797	2401.96
C12	13	303205	79335.9	55514.8	442600	1990.28
D1	13	359874	92192.1	65216.5	498338	2870.31
D2	13	270589	67786.3	54883.5	397325	1595.18
D3	13	332842	78888.8	67502	445121	2649.26
D4	13	278838	75103	68584.4	445801	2332.24
D5	13	369355	86715.7	84610	517131	4157.64
D6	13	347797	79118.6	81794.4	490069	3641.6
D7	13	284898	65905.3	66659.6	407595	2364.61
D8	13	305078	69810.8	65668.3	406416	1833.92
D9	13	310648	71063	66275.9	418486	2604.54
D10	13	294324	72020.3	61576.3	415132	1639.33
D11	13	297571	75745.4	58984.5	426569	643.309
D12	13	332012	88093.5	62933.7	487208	2518.6
E1	13	374978	96717.1	74058.2	573752	2606.54
E2	13	313084	85236.7	69304.1	496321	2253.35
E3	13	359187	86650.5	82740.4	544997	2261.48
E4	13	322714	81873.9	78470.5	486564	2732.14
E5	13	397673	93096.4	93904.2	560673	3225.19
E6	13	385996	88699.3	94505.1	549503	3933.18
E7	13	291714	70382.1	71141.5	429698	1841.55
E8	13	396761	96638.7	85868.6	513107	2670.54
E9	13	361371	86656.8	76756	477338	2654.18
E10	13	302526	72396.2	65199.8	433082	1703.36
E11	13	320353	78756.1	63339.8	445771	1827.48
E12	13	351604	90707.6	66429	504906	1898.18
F1	13	383563	105258	78033.9	571962	2851.85
F2	13	307322	85470.9	67330.5	482358	1843.24
F3	13	404159	105040	90585.4	576766	3368.79
F4	13	336011	81397.1	79017.9	498488	2544.8
F5	13	469055	106379	109492	665343	2946.35
F6	13	388207	88099.1	93881.9	555489	3338.86
F7	13	323733	79319.6	78974.1	479713	2511.25
F8	13	379213	91703.9	84199.2	510947	3169.68
F9	13	432049	104510	90378.1	563117	2472.98
F10	13	350418	88281.5	73381	495810	1544.45
F11	13	346156	87581.2	67418.9	480970	480.114
F12	13	333452	87542.2	64940.2	507598	2182.21
G1	13	365104	93338.4	73217.6	581506	3041.77
G2	13	351650	97103.5	73887.7	537160	17440.2
G3	13	429732	103943	91471.4	622696	2978.78
G4	13	400122	104154	96859.4	632658	2855.74
G5	13	470784	111378	115872	729728	3857.04
G6	13	492991	119046	120940	739015	4068.26
G7	13	339131	82240.4	76782.6	472030	2478.12
G8	13	394845	93516.5	84511.1	522273	2955.03
G9	13	446304	105364	91656	579350	3094.19
G10	13	360531	92110.1	72414.7	497236	1211.23
G11	13	334164	87402	65519	470610	2202.36
G12	13	388503	105003	71806.1	568770	1903.83
H1	13	435197	112711	78055.2	635297	3166.77
H2	13	339149	87949.5	70198.9	541496	2059.5
H3	13	439575	105927	85885.9	594191	3737.92
H4	13	301833	24988.2	13356.1	11132.5	3208.47
H5	13	429268	37680.8	20974.6	16859.7	4460.68
H6	13	383628	33297.3	18571.1	14770.4	4189.15
H7	13	331415	83119.8	72317	475115	2375.58
H8	13	401403	98108.8	84613.5	555525	2743.11
H9	13	400234	97664	83661.1	565996	3230.15
H10	13	279248	22262.8	11715.1	9805.25	2363.48
H11	13	290824	22825.5	11214.8	9287.3	2583.11
H12	13	331144	25248.6	11552.6	9176.79	1969.82
A1	14	287427	75398.8	45967.1	420498	1465.79
A2	14	268316	67361.3	47666.6	401290	1797.49
A3	14	267206	63188.6	51084	410442	1804.79
A4	14	252107	57805.3	48651.4	369263	1546.92
A5	14	318863	75328.6	59844.3	425506	2281.98
A6	14	332062	69701	61164.4	424620	2498.11
A7	14	229198	52573	44535.1	324402	1693.17
A8	14	304777	67612.5	56250.1	406244	2420.13
A9	14	328583	73649.8	57650.6	419596	2244.08
A10	14	305865	74501	53387.3	409135	1816.62
A11	14	333793	88591.3	53735.1	443462	0
A12	14	365944	96660.1	56440.3	474281	2325.65
B1	14	260883	66858.6	46148.2	389316	2059.5
B2	14	252761	62577.8	49153.2	395850	2421.18
B3	14	272005	65106	55473.3	417446	1915.48
B4	14	233996	53208.2	51692.6	377331	9474.79
B5	14	306372	72282.1	63485.6	428106	3157.29
B6	14	321933	69163.4	69280.6	458597	2841.93
B7	14	213270	49263.7	43701.5	300227	2056.07
B8	14	293951	67207.5	57307.9	382987	2003.93
B9	14	293498	67404.2	57097.4	397184	1890.78
B10	14	253529	58884.7	50514	370184	2036.53
B11	14	308116	76004.7	54446.9	411257	2146.12
B12	14	297177	76012.5	51763	425558	1446.47
C1	14	332274	87140.3	58298.6	460096	2593.74
C2	14	258900	63603	52524.8	397159	2279.09
C3	14	281473	65169.5	58420.7	406838	2325.2
C4	14	206306	44172.5	50998.3	357613	2487.79
C5	14	315227	68959.1	71599	468381	3209.71
C6	14	319883	67597.6	71672.8	454240	3141.95
C7	14	238006	56786.7	54645.4	358663	2127.81
C8	14	305969	72333.6	64453.1	415456	1923.29
C9	14	336745	79001.9	67089.1	439842	1888.64
C10	14	243590	55823.4	53000.1	376727	2515.11
C11	14	312144	78242.4	57455	421888	1904.61
C12	14	303768	79180.8	55483.9	442477	2011.15
D1	14	359777	92287.1	65137.7	497588	3014.5
D2	14	270295	67880	54738.3	396864	1422.07
D3	14	333466	79148.9	67534.1	445576	2731.67
D4	14	278834	75137.5	68779.9	445258	2268.08
D5	14	369770	86612.7	84623.8	517442	3610.82
D6	14	347799	79307.1	81919.9	489803	3419.94
D7	14	285436	66296	66535.2	407571	2754.62
D8	14	304798	70048.1	65630.8	406617	1839.78
D9	14	310102	71117.4	66241.5	418193	2553.11
D10	14	294401	72428.9	61510	415480	1901.97
D11	14	297652	75938.8	59027	426493	867.696
D12	14	331834	88646.5	63030	486728	2263.57
E1	14	375435	96948	74080.8	573798	3027.53
E2	14	313046	85260.1	69219.3	495477	2159.98
E3	14	358888	86521.9	82556.3	544815	2955.06
E4	14	323074	81628.4	78614.1	486477	2861.18
E5	14	398075	93138.3	93802.1	560391	3304.53
E6	14	386879	88778.6	94420.4	549190	3956.62
E7	14	292131	70656.1	71170	429955	2165.56
E8	14	397372	96635.7	85768.8	513263	2623.75
E9	14	361481	87128.1	76805.3	477396	2255.73
E10	14	301782	72128.1	65331.1	433270	1802.97
E11	14	320420	79007	63364.4	445050	1811.33
E12	14	351543	90773.8	66321.3	504533	2035.45
F1	14	383383	105530	77967.4	572280	2737.65
F2	14	307231	85501.3	67230.3	482159	2064.43
F3	14	404815	104952	90736.5	576261	2687.73
F4	14	336813	81656.3	79307.8	498183	2674.35
F5	14	469511	106417	109557	665597	3452.24
F6	14	388642	88546.5	93886.3	554712	3625.53
F7	14	324024	79471.4	79082.7	479802	2153.59
F8	14	379357	91912.2	84453.2	509826	3159.56
F9	14	432114	105081	90520.6	562673	2691.91
F10	14	350896	88355.9	73471.4	495687	1762.95
F11	14	346534	87619.9	67219.5	480246	697.698
F12	14	333848	87731.4	64846	506702	2075.63
G1	14	365719	93394.4	73008.5	581385	2940.93
G2	14	351383	96367.9	73806.6	536090	18488
G3	14	429435	104005	91577.3	623712	3501.55
G4	14	401252	104417	96764.9	631870	2901.15
G5	14	471598	111688	115884	729000	3472.3
G6	14	494375	119592	120971	738042	4061.77
G7	14	339580	82277.3	76676.5	471980	2435.15
G8	14	394404	93792.7	84266.9	522400	2865.63
G9	14	445671	105529	91606.5	579053	3103.32
G10	14	361118	92548.8	72445.1	497428	1287.62
G11	14	334500	87822.8	65492.1	470332	2251.92
G12	14	388643	105229	71776.1	568545	1401.65
H1	14	434517	112499	78135.5	633582	3144.68
H2	14	338465	88436.6	70380.5	541568	2157.95
H3	14	439768	106031	85905.1	594114	3438.51
H4	14	301637	24905	13534	11124.9	3593.18
H5	14	428956	37705.9	21273.5	17197.5	4669.72
H6	14	382869	33451.9	18729.9	14629.5	4054.19
H7	14	331417	83329.8	72240.1	474312	2184.22
H8	14	401336	98370.8	84405	554922	2729.19
H9	14	399640	98078.6	83600.6	565416	3145.57
H10	14	279467	22488.6	11453.1	9714.04	2763.57
H11	14	290563	23262.7	11062	9310.03	2491.43
H12	14	330293	25993	11387.2	9020.81	2426.85
A1	15	288676	75471	45769.6	419712	1598.38
A2	15	269376	67630.7	47605.3	401133	1947.19
A3	15	268090	63051.8	50915.5	410681	1492.87
A4	15	251656	57804.4	48542.7	368979	1623.23
A5	15	319742	75554.9	59984	425352	2184.77
A6	15	332148	69390.3	61183.5	425030	2510.15
A7	15	228931	52611	44656.5	324677	1757.52
A8	15	304617	67738.6	56318	406245	2139.51
A9	15	328709	73663.2	57756.8	419667	2590.14
A10	15	305361	74743.8	53370.3	408663	1899.15
A11	15	333974	88759.5	53780.8	442869	0
A12	15	366286	96514.8	56468.7	473747	2633.81
B1	15	260972	67275.9	45894.2	389145	1739.79
B2	15	253415	62913.2	49309.1	395413	2434.47
B3	15	272181	65230.1	55612.6	417558	1826.23
B4	15	234201	52936.4	51739.2	377505	9681.76
B5	15	306649	72452.9	63554.8	428341	3127.8
B6	15	321978	69608.3	69106.8	458509	2941.21
B7	15	212861	49578.5	43920.7	300847	1938.32
B8	15	293769	67608.1	57283.6	382952	2026.2
B9	15	293626	67376.6	56814.6	397227	1779.07
B10	15	253120	58897.3	50612.3	370334	1946.73
B11	15	308143	75953.6	54347.8	411024	1750.97
B12	15	296946	76085.6	51630.7	425396	1720.76
C1	15	332959	87486.3	58143.9	459498	2808.86
C2	15	259016	63623.7	52608.8	397059	2744.23
C3	15	281781	65448.7	58546.5	407023	2448.81
C4	15	206364	44174.4	51144.1	356980	2521.98
C5	15	315349	69248.9	71698.3	467524	2934.03
C6	15	319779	67524.7	71575.7	454496	3113.04
C7	15	238502	57115.3	54697.9	358354	2062.16
C8	15	305958	72397.5	64560.7	415876	1775.66
C9	15	336926	79555.2	67037	440544	1791.93
C10	15	243561	55842.1	52989	376389	2261.25
C11	15	311458	78377.9	57342.3	421839	2036.35
C12	15	303877	79332.4	55433	442206	1365.3
D1	15	359822	92443.8	65088.8	496750	3236.33
D2	15	270688	67966.4	54990.1	396913	1703.87
D3	15	332811	79141.9	67620.3	445272	2465.11
D4	15	279652	75749.8	68633.7	445887	2297.69
D5	15	369775	86718.5	84492.1	517318	3813.6
D6	15	348425	79529.7	81951.3	490222	3336.45
D7	15	285171	66312.6	66455.5	407419	2681.92
D8	15	304845	70022.2	65916.9	406338	1649.11
D9	15	310221	71373.7	66234.8	418279	2225.12
D10	15	294709	72543.6	61611.7	415206	1857.9
D11	15	297663	75987.9	59018.3	426244	853.251
D12	15	332692	88607.8	63047.2	486492	2372.3
E1	15	376388	97491.9	74106.1	573630	2909.98
E2	15	312798	85366.3	69332	494912	2468.55
E3	15	359508	86986	82410.8	544192	2748.18
E4	15	323711	82439.8	78673.8	486255	3036.21
E5	15	397960	93511.1	93750	560336	3276.05
E6	15	386549	89060.5	94374.7	548830	4070.89
E7	15	292398	70743	71341.1	429717	2337.32
E8	15	397477	97315.5	86039.1	513200	2858.75
E9	15	361624	87210	77002.2	477087	2605.53
E10	15	302349	72121.9	65288.5	432878	1919.64
E11	15	320214	79199.7	63235.1	445175	1759.3
E12	15	351458	90529.2	66351.9	505754	2356.28
F1	15	384177	105866	77925	571780	2912.65
F2	15	307753	85453.9	67256.2	481349	2081.98
F3	15	405141	104973	90526.8	576609	3368.79
F4	15	337232	81858.4	79271.3	497552	2493.39
F5	15	469991	106670	109813	664677	3362.21
F6	15	388804	88435.9	93803.2	556618	3500.66
F7	15	324247	79798.6	79033.6	479988	2416.58
F8	15	380054	92102.8	84279.2	509803	3067.46
F9	15	432967	104958	90358.9	563182	2578.67
F10	15	350700	88346.4	73691.5	495446	1805.58
F11	15	346254	88011.4	67198.8	480261	442.318
F12	15	333787	87982.6	65008.6	507792	1597.76
G1	15	365636	93440.5	72773	580857	3144.11
G2	15	351796	96660.4	74039.9	536557	18707.6
G3	15	430062	104373	91480.2	622669	3317.19
G4	15	401938	104859	96740.2	632391	2938.66
G5	15	472170	112292	115861	729502	3801.39
G6	15	495191	119971	120969	739268	3831.23
G7	15	338927	82254.8	76737.4	471695	2308.12
G8	15	394013	93972.4	84276.5	521655	2674.2
G9	15	445952	105347	91467.1	578962	2992.75
G10	15	361104	92727.8	72571.1	496721	1073.74
G11	15	335363	88339.2	65446.8	470124	1824.02
G12	15	389446	105468	71816.6	568694	2116.05
H1	15	435159	113195	77556.7	633129	2828.69
H2	15	338380	88400.8	70268.7	540870	2275.86
H3	15	439557	106005	85970	593991	3508.61
H4	15	302133	24994.8	13609	11198.9	3275.25
H5	15	428520	37661.8	20920.7	17207.5	4613.78
H6	15	382786	33573	18587	14912.3	3899.57
H7	15	332017	83322.1	72334.3	474687	2532.15
H8	15	402270	98610.6	84607.9	554517	3020.48
H9	15	399946	97786.8	83515.5	565372	2787.97
H10	15	279661	22304.1	11482.9	9620.36	2941.39
H11	15	290355	22825.5	11283.1	9328.75	2692.07
H12	15	330856	25507.7	11292.4	9466.71	2403.82
A1	16	287869	76242.4	46055.4	419388	1814.03
A2	16	269669	67644.5	47778.1	401299	1836.78
A3	16	267191	63265.3	51107.3	411014	2010.77
A4	16	252007	58169.5	48780.5	369057	1976.14
A5	16	319146	75581.7	59938.2	425138	2213.93
A6	16	332059	69699.5	61217.8	424622	2396.96
A7	16	228950	52565.1	44601.8	324316	1861.28
A8	16	304866	67742.7	56408.3	406422	2522.25
A9	16	328707	73679.3	57662.1	419545	2198.77
A10	16	306409	74935	53206.8	409045	2150.76
A11	16	335216	89128.1	53890.6	442844	0
A12	16	365843	96766.7	56366.5	473322	2293.87
B1	16	261070	67344.9	46130.6	388877	1976.91
B2	16	253596	62991.5	49377.9	395409	2250.53
B3	16	272441	65420.8	55653.3	417341	1774.25
B4	16	234623	53246.4	51450.1	377387	9659.34
B5	16	307496	72661	63592.8	429164	3242.4
B6	16	322071	69582.9	69077.2	458426	3028.38
B7	16	213254	49608.3	43767.3	300302	1941.38
B8	16	293603	67555.7	57373.9	383068	2120.07
B9	16	293799	67107.9	57072	397469	1946.63
B10	16	252926	59153.8	50572.1	370099	1928.78
B11	16	307594	75787.8	54468.4	411294	1837.18
B12	16	297355	76180	51802.3	425361	1912.21
C1	16	333019	87711.9	58349.7	459401	2827.3
C2	16	259314	64014.9	52610.9	396396	2556.72
C3	16	282380	65675.8	58414.2	406786	2476.9
C4	16	206331	44131	51158.7	357688	2322.72
C5	16	315481	69318.1	71640.1	468001	2976.99
C6	16	320325	67451.7	71603.8	454178	3116.26
C7	16	238739	57103.1	54550.7	358126	2158.17
C8	16	306416	72663	64569.7	415517	1720.41
C9	16	337216	79519.5	66948.2	439909	1779.53
C10	16	243575	55826.8	52825.5	376291	2323.84
C11	16	311814	78684.1	57418.8	421428	2114.99
C12	16	303821	79833.7	55480.5	442345	1645.39
D1	16	360450	92567.2	65001.6	497228	2804.99
D2	16	270974	68177.5	55023.6	396665	1754.19
D3	16	333630	79253.7	67599.3	444988	2781.52
D4	16	279844	75987.9	68556.3	445401	2323.36
D5	16	369966	86849.1	84700.4	517090	3837.82
D6	16	348497	79487.5	82029.3	489770	3492.86
D7	16	285422	66515.4	66558.5	407760	2768.38
D8	16	305220	69952.5	65802.6	406050	1805.49
D9	16	309825	71138	66280.9	418492	2413.14
D10	16	295174	72817.1	61586.1	415316	1712.48
D11	16	298187	76282.4	59042.4	426381	634.641
D12	16	332769	88803.3	62809	486167	2331.78
E1	16	375930	97292.4	74026.2	573655	2786.97
E2	16	313571	85331.6	69347.6	495040	2008.54
E3	16	359529	87063	82461	544525	2443.31
E4	16	324494	82439.8	78598.7	485931	2555.98
E5	16	398992	93721.8	93958.2	560251	3536.42
E6	16	386891	89352.6	94512.9	548081	3946.85
E7	16	292425	70774.1	71150.4	429356	2280.72
E8	16	398130	97326.3	85913	512788	2764.14
E9	16	361851	87204.6	76829.9	477209	2605.53
E10	16	302066	72341.4	65231.7	433279	1893.62
E11	16	320214	79118.8	63267	444665	1460.55
E12	16	351472	90630.8	66272.4	503083	2132.1
F1	16	383612	105718	77946.2	571733	3074.3
F2	16	307670	85524.4	67230.3	481035	2099.54
F3	16	405635	105361	90627.9	575695	3215.48
F4	16	337784	82065.4	79221.6	498178	2604.43
F5	16	470622	107009	109368	664328	3434.02
F6	16	389668	88565	93923.9	554579	3199.93
F7	16	324507	80130.5	79093	479897	2428.05
F8	16	379482	92335.5	84398.2	510110	3120.09
F9	16	432885	104937	90568.8	563354	2798.68
F10	16	350154	88325.1	73553.3	494912	1889.79
F11	16	347099	88444.9	67341	479930	452.533
F12	16	333199	87767.7	64998	505841	2029.22
G1	16	365881	93489.9	73099.9	580874	2919.86
G2	16	350608	96332.2	73936.4	535994	19541.9
G3	16	430624	104490	91611.3	622991	3262.89
G4	16	402927	105015	96880.1	632454	2724.45
G5	16	472939	112720	115977	728322	3644.04
G6	16	495884	120486	120766	738137	4108.07
G7	16	338950	82326.8	76720.8	471480	2586.47
G8	16	394257	93888.2	84128.9	521488	2488.6
G9	16	445810	105502	91507.5	578551	3097.24
G10	16	361714	93006	72547.2	497626	1378.19
G11	16	335346	88506.2	65686.7	470427	2030.72
G12	16	389501	105731	72009.7	568465	2249.31
H1	16	434056	112798	77887.9	632262	2781.12
H2	16	338849	88252.4	70350.2	540795	2436.13
H3	16	439986	106476	85775.4	594120	3731.98
H4	16	301790	24940.9	13582.7	11397.2	3596.95
H5	16	428762	37555.6	20949.7	17015.7	4741.37
H6	16	383140	33487.3	18676.6	14809	3970.18
H7	16	331693	83445.5	72240.1	474373	2494.46
H8	16	402050	98776	84393	554423	2771.86
H9	16	400206	98119.5	83549.5	565495	3122.02
H10	16	279475	22429.2	11746.1	10016	2226.42
H11	16	290893	22984.1	11103.6	9343.45	2741.23
H12	16	330882	25128.3	11271.9	9147.42	2361.3
A1	17	288215	75924	46004.5	418506	1717.86
A2	17	270332	67714.4	47859	401572	1695.57
A3	17	268380	63488.2	51167.2	410902	1971.53
A4	17	251779	58365.8	48548.9	369034	1835.67
A5	17	320021	75628.7	60074.6	425641	2097.28
A6	17	332729	69643.5	61262.4	425268	2416.23
A7	17	229337	52685.4	44624.3	324267	1936.89
A8	17	305022	67863.9	56427.3	406549	2381.94
A9	17	329155	73839.3	57735.8	419500	1952
A10	17	306324	75140.5	53391.3	408834	1756.24
A11	17	334508	89370.3	53799.1	442790	0
A12	17	366303	97054.2	56382.1	472741	2076.92
B1	17	261091	67318.5	46186.3	388481	2276.64
B2	17	253869	63358.4	49382.5	395208	2338.07
B3	17	273257	65550.9	55558.7	417271	1803.67
B4	17	234586	53585.4	51678.8	377213	9431.67
B5	17	307036	72751.8	63593.7	428345	3021.63
B6	17	322526	69406.7	69419.9	458205	2909.73
B7	17	213198	49764.6	43819	300209	1905.44
B8	17	293671	67724.9	57194.9	382827	2359.53
B9	17	293484	67498.7	56998.8	396834	1536.77
B10	17	253120	59037.2	50678.4	370143	2072.45
B11	17	307342	75861.8	54478.6	411158	2197.44
B12	17	297138	76221.3	51534.3	425025	1671.5
C1	17	333201	87518.8	58450.8	459327	2758.46
C2	17	259037	63996.4	52797.7	396048	2331.92
C3	17	281874	65561.3	58390.7	406518	2533.09
C4	17	206554	43988.6	51092.6	357429	2134.21
C5	17	315869	69370.8	71565	467875	3127.36
C6	17	319844	67432.3	71688.9	454397	3165.24
C7	17	238644	57122.1	54661.3	358336	2014.57
C8	17	306697	72910.4	64644.7	415359	1726.18
C9	17	337341	79651.3	66966.1	439784	1633.24
C10	17	243211	55874.3	52921	376450	2320.37
C11	17	312239	78910.9	57464.1	421798	2246.73
C12	17	304473	80083.7	55363.3	442322	1922.18
D1	17	360534	92561.1	64998.1	496510	2580.69
D2	17	271560	68352.5	54821.5	396152	1283.19
D3	17	333852	79274.4	67635.4	444512	2924.97
D4	17	280896	76053.3	68811.8	445788	2310.52
D5	17	370833	86946.6	84644.4	517161	4033.54
D6	17	348856	79564.7	81992.2	490068	3615.69
D7	17	285366	66510.7	66492.5	408237	2721.22
D8	17	304950	70219.8	65994.5	406434	1870.72
D9	17	309878	71436.3	66261.6	418323	2384.48
D10	17	294822	73118.1	61646.3	415485	1661.36
D11	17	298688	76698.6	59136.2	426403	599.009
D12	17	333166	89098.6	62929.6	486397	2284.33
E1	17	376999	97968.9	74189.8	574128	3005.66
E2	17	313447	85441.1	69381.1	494526	2173.64
E3	17	359707	87072.5	82571.3	544530	2690.47
E4	17	324734	82748.7	78634	485974	2976.75
E5	17	399214	93683.7	93780.1	559407	3313.68
E6	17	387973	89487.1	94623.8	548172	3785.69
E7	17	292916	71162.4	71498.4	429030	1860.1
E8	17	398418	97634.3	85690.1	512719	2692.93
E9	17	362043	87543.1	77025.9	477023	2684.48
E10	17	301671	72159.1	65300.1	433114	1844.26
E11	17	320213	79101	63250.6	444556	1662.4
E12	17	351364	90967.2	66168.8	504040	2009.46
F1	17	384042	105612	77973.4	571179	2599.73
F2	17	308035	85615.5	67384.7	481409	2012.93
F3	17	405354	105418	90702.4	576052	3230.08
F4	17	338047	82052.5	79248	497036	2529.37
F5	17	470470	106900	109636	664754	3603.36
F6	17	389424	88784.5	93913.4	556253	3324.79
F7	17	324440	80070.1	79203.5	479703	2542.81
F8	17	380556	92538.8	84224.2	509985	3120.09
F9	17	433267	105342	90381.4	562967	2834.27
F10	17	351249	88325.1	73616	494896	1872.73
F11	17	347250	88324.4	67343.1	480106	791.678
F12	17	333053	87933.9	64784.7	506112	2066.18
G1	17	366834	93723.8	72993	581185	2892.76
G2	17	351394	95835.4	73738	536305	20384.8
G3	17	430153	104147	91785.2	623252	3267.95
G4	17	403675	105350	96892	631167	2823.16
G5	17	472995	112940	115988	730102	3565.36
G6	17	496388	120545	120881	738746	4408.05
G7	17	339229	82860.3	76685.7	470782	2429.55
G8	17	393961	93952.6	84314.2	520663	2671.28
G9	17	445634	105397	91592.4	577706	3237.24
G10	17	361859	92793.2	72506	497133	1017
G11	17	336566	88840.3	65631.6	469752	1853.03
G12	17	389692	106252	71811.4	568428	1979.1
H1	17	434639	112611	77630.1	631312	3346.85
H2	17	338754	88489.8	70279.2	540552	2164.82
H3	17	440253	106299	85690	594228	3331.57
H4	17	301610	24772.6	13299.8	11392.5	3297.83
H5	17	428016	37505.5	21090.6	17119	4337.01
H6	17	382927	33473.1	18653.6	14569.4	3887.95
H7	17	331758	83653.6	72433.3	474082	2217.08
H8	17	401953	99012.9	84588.4	554285	3079.85
H9	17	400132	98393	83570.8	564403	2809.39
H10	17	279208	22246	11638.1	9705.41	2527.72
H11	17	290279	22817	11169.2	9534.63	2882.08
H12	17	329796	25199.7	11437.4	9409.83	1831.65
A1	18	289643	75828.8	46012	418293	1445.39
A2	18	270210	68178.7	47731.1	401149	1636.11
A3	18	268544	63365.9	51067.8	410745	1620.39
A4	18	252406	58050.4	48695.6	368603	1762.83
A5	18	320141	75749.6	59753.7	425090	2214.75
A6	18	332221	69584.5	61151.7	424619	2315.08
A7	18	229509	52721.8	44585.7	324313	1666.63
A8	18	304626	68004	56361.1	406135	2454.17
A9	18	328854	73814.5	57824.8	419597	2504.35
A10	18	307226	75373.2	53551.8	408418	1971.62
A11	18	334645	89379.8	53731.7	442057	0
A12	18	366010	97122.2	56323.9	472546	2063.1
B1	18	260704	67339	46088.5	388376	2231.35
B2	18	254292	63158.6	49410	394728	2220.61
B3	18	273052	65538.8	55604.5	417636	1524.14
B4	18	235104	53721.3	51707.2	377307	9506.7
B5	18	307287	72689	63447.6	428464	2889.34
B6	18	323036	69693.3	69355	458661	3029.19
B7	18	213537	49780.6	43794.3	300155	1868.74
B8	18	293916	67773.5	57389.6	382992	2380.21
B9	18	293621	67320.4	56961	396971	1738.01
B10	18	252845	58754.6	50626.6	369726	1957.51
B11	18	308369	75822.2	54402.9	411491	1900.82
B12	18	297197	76292.1	51722.7	425471	1930.12
C1	18	332845	87645.8	58335.1	458857	2630.62
C2	18	259413	64008.4	52732.6	395945	2575.37
C3	18	282791	65430.1	58580.2	406233	2533.09
C4	18	206228	44108.4	51232.5	357105	2445.79
C5	18	316173	69325.8	71701.8	467398	3071.87
C6	18	320283	67537.9	71804.4	454699	2800.7
C7	18	239229	57393.8	54651	358071	2140.12
C8	18	307357	72971.9	64608	415188	1842.47
C9	18	338100	80013.2	67074.4	439891	1694.4
C10	18	243273	55787	53043.2	376614	2163.01
C11	18	312748	79085.5	57373.5	421416	2121.12
C12	18	304494	80062.9	55553.6	442375	1668.45
D1	18	361589	92274.8	65091.2	496266	2997.25
D2	18	271768	68257.8	54707.8	395616	1813.57
D3	18	334258	79282.3	67679.5	444290	2549.55
D4	18	280930	76521.2	68986	445704	2323.36
D5	18	370350	87036.8	84704.3	516801	3796.45
D6	18	348975	79722.6	82140.5	490310	3798.97
D7	18	285886	66956	66573.1	407277	2824.37
D8	18	305206	70194.7	65865.2	405787	1547.92
D9	18	309834	71307	66189.5	418376	2538.78
D10	18	295423	72692.7	61595.8	415346	1723.05
D11	18	299268	77123.6	59064.7	426096	919.7
D12	18	333180	89354.1	62864.8	486054	2196.36
E1	18	377043	98120.6	74027.6	573715	2516.33
E2	18	313393	85632.1	69298.5	494803	2435.53
E3	18	360406	87352	82554.2	544070	2646.92
E4	18	325261	82375.3	78596.4	486151	2676.04
E5	18	399922	93882.9	94029.3	559060	3344.19
E6	18	388474	89389.4	94390.3	547773	3418.45
E7	18	293096	71244.6	71252.6	429093	2000.63
E8	18	398131	97629.4	85976.6	513375	2944.21
E9	18	362488	87633.1	76933.8	477008	2481.58
E10	18	301838	72053.8	65383.5	432478	1855.92
E11	18	320173	78991	63344.4	444109	1645.36
E12	18	351622	91037.8	66302.2	503830	1838.08
F1	18	384165	106016	78035.4	571120	2561.18
F2	18	307596	85600.9	67139.5	480533	2089
F3	18	406880	105167	90630	575373	2913.02
F4	18	338396	82477.4	79293.6	497633	2263.07
F5	18	470889	106980	109683	663206	3322.55
F6	18	389915	88798.9	93853.1	554074	3478.68
F7	18	324632	80060.1	79193.1	479894	2422.31
F8	18	380631	92856.6	84166.2	509946	3130.21
F9	18	433618	105321	90426.3	562730	3033.79
F10	18	350776	88464.5	73566.1	494678	1709.66
F11	18	347686	88613.7	67410.6	480107	615.977
F12	18	333195	87841.2	64933.1	505193	2156.42
G1	18	366583	93788	73031.7	581210	3279.57
G2	18	350361	95385.9	73694.4	535572	21134.4
G3	18	431582	104593	91593.7	623558	3291.94
G4	18	404296	105933	96849.6	630958	2928.78
G5	18	473799	113441	116080	728545	3538.5
G6	18	497092	120693	120934	738158	4342.31
G7	18	339060	82645.3	76667.3	470456	2399.66
G8	18	393953	94004.6	84130.8	520857	2623.67
G9	18	444800	105531	91477.2	578085	3183.47
G10	18	362246	93285.4	72538.5	496798	1114.12
G11	18	336288	89132.2	65714.9	470103	1954.56
G12	18	391032	106162	71645.7	568164	1871.75
H1	18	435790	112644	77638.7	630081	3234.72
H2	18	338947	88567.7	70393.3	540497	2185.42
H3	18	439603	106248	85914.8	594170	3193.75
H4	18	301774	25033.6	13431	11612.6	3384.37
H5	18	428168	37551.6	20924.7	17048.5	4630.47
H6	18	382524	33490.8	18717.4	14994.9	3809.29
H7	18	331696	83816.4	72250.7	473255	2411.34
H8	18	401505	99186.7	84360.5	553869	2558.5
H9	18	399820	98260.6	83408.2	564637	3169.12
H10	18	279463	22573.8	11672.8	9651.18	2578.35
H11	18	290641	22651.2	11275.1	9467.78	2868.79
H12	18	330074	25077.3	11383.5	9242.84	2389.65
A1	19	288588	76063.5	45950.6	417888	1696.01
A2	19	271125	68124.8	47789	400631	1908.97
A3	19	268950	63488.2	51338.7	410678	1814.6
A4	19	252615	58280.5	48600.1	368881	1781.04
A5	19	320170	75727.7	59917.8	425522	2158.85
A6	19	332682	69558.1	61333.3	424236	2557.51
A7	19	229259	52699.6	44557.6	324334	1778.44
A8	19	304424	68030.4	56318.8	406183	2294.76
A9	19	328747	74182.9	57767.4	419004	2623.88
A10	19	307512	75329.7	53396.3	408601	1839.77
A11	19	335143	89697.2	53873.4	441715	0
A12	19	366338	97505.4	56332.5	471674	2212.34
B1	19	261208	67268.5	45992	388452	1952.93
B2	19	253977	63494	49494.9	394634	2217.29
B3	19	273674	65568	55690.9	417126	1735.01
B4	19	235447	53627	51609.7	377500	9663.65
B5	19	307100	72731.9	63626.6	428067	2774.74
B6	19	322891	69619.9	69351	458543	3035.65
B7	19	213664	49833.7	43926.7	300184	2079.77
B8	19	293498	67934.3	57238.1	382757	2305.43
B9	19	293462	67532.9	56974.9	396687	1683.8
B10	19	252732	58869.5	50595.3	370012	2072.45
B11	19	307848	75988	54533.8	411735	1722.23
B12	19	296493	76075	51605	425598	1815.93
C1	19	333703	87866.1	58309.5	458956	2535.96
C2	19	259489	64035.6	52576.2	396290	2335.03
C3	19	283457	65791.2	58320.3	406485	2282.12
C4	19	206328	43887.6	51177.2	356616	2356.91
C5	19	315963	69395	71595.4	467800	2858.84
C6	19	320440	67552.6	71665.6	454611	3128.3
C7	19	238776	57620.7	54771.1	358185	2026.87
C8	19	306899	73212.2	64515.9	415350	1903.5
C9	19	337987	79789.4	66902.6	439334	1572.9
C10	19	242161	55742.9	52821.2	376388	2252.56
C11	19	312780	78828.6	57380.5	421696	2312.09
C12	19	304587	80211	55369.9	442175	1821.13
D1	19	360864	92735	65128.2	495962	3439.68
D2	19	271280	68517.2	54960.6	395339	1747.15
D3	19	334846	79543.3	67479	444408	2371.51
D4	19	281117	76800.1	68849.5	445359	2437.85
D5	19	370566	86853.7	84745.6	516574	3981.08
D6	19	348948	79568.2	82065.4	490370	3434.33
D7	19	285124	66665.3	66596.4	407672	2836.16
D8	19	304877	70186.6	65647.5	405857	1785.42
D9	19	309892	71379.5	66246.5	417757	2379.42
D10	19	295870	73094.2	61625	415715	1649.02
D11	19	299120	77064.7	59037.6	425526	704.943
D12	19	333655	89250	63034	486504	2341.66
E1	19	377822	97917	74024.9	573496	2796.53
E2	19	313173	85827.6	69278.4	494544	2155.43
E3	19	360671	87701.1	82569.1	544024	2433.51
E4	19	326165	83044.9	78724.6	486133	2688.38
E5	19	400403	93944.9	94066.3	559261	3093.99
E6	19	389117	89641	94573.2	548029	4101.17
E7	19	293300	71389.1	71414.8	428816	2204.59
E8	19	398167	97922.7	86017.9	513200	2828.23
E9	19	362890	87742.3	77001.3	477469	2605.53
E10	19	300769	71942.3	65295.6	432385	1748.23
E11	19	320288	79213.8	63106.6	443745	1886.69
E12	19	351257	90735	66147.3	503242	2119.11
F1	19	384360	105644	78047.5	570802	2651.64
F2	19	307904	85954.4	67257.4	480493	2074.96
F3	19	406103	105502	90658.8	575279	2982.89
F4	19	338935	82602.6	79429.4	497892	2703.14
F5	19	471303	106835	109450	664399	3483.32
F6	19	389701	88587	93788.4	556308	3688.84
F7	19	324721	80409.3	79030.7	479799	2248.27
F8	19	380233	92917.2	84406.2	509672	3358.93
F9	19	433285	105119	90756.2	562400	2705.93
F10	19	350055	88462.3	73578.8	494617	1460.24
F11	19	347557	89163.3	67507.2	479372	560.815
F12	19	332824	87648.2	65030.8	505508	2187.36
G1	19	366345	93936.2	73042.6	580731	3139.6
G2	19	351166	95519.9	73663.2	535342	22010.4
G3	19	431749	104556	91767.6	622125	3194.71
G4	19	404212	105852	96846.6	632471	3147.93
G5	19	474876	113466	116085	727498	3703.53
G6	19	498004	121031	120898	738589	4084.92
G7	19	338565	82757.8	76560.2	470770	2874.17
G8	19	393396	94195.7	84292	520341	2666.42
G9	19	445391	105302	91452	577780	2881.15
G10	19	362262	93594.2	72425.6	497095	1378.19
G11	19	337812	89389.8	65867.9	470132	2047.64
G12	19	391147	106688	72214.5	567531	2134.56
H1	19	434245	113029	77532.8	629679	3153.18
H2	19	338893	88614.7	70398	539825	2576.94
H3	19	439992	106489	85846.3	594222	3310.19
H4	19	301324	25044	13479.7	11080.3	3506.65
H5	19	427829	37460.5	21163.6	17265.1	4983.79
H6	19	382328	33204.6	18642	14871	4230.27
H7	19	331800	83897.4	72257.4	473614	2419.07
H8	19	401885	99210.9	84506	553577	2942.55
H9	19	399487	98597.6	83687.7	564134	2789.04
H10	19	278472	22775.1	11610.8	9901.4	2772.22
H11	19	290837	23069.8	11229.5	9292.65	2153.92
H12	19	330438	25554.6	11225.4	9541.95	2015.88
A1	20	289317	76404.9	45699.3	417832	1747
A2	20	271105	68144.3	47747.5	401039	1861.2
A3	20	268529	63612.6	51008.9	410943	2166.73
A4	20	252245	58449.3	48722.2	368340	1610.22
A5	20	320097	75692.8	59975	424745	2374.33
A6	20	332550	69642.8	61211.4	424509	2391.34
A7	20	229518	52710.7	44716	324658	1760.74
A8	20	304388	67862.2	56424.8	406147	2159.44
A9	20	328639	74205.8	57889.8	419613	2504.35
A10	20	307251	75788.1	53541.8	408236	2026.97
A11	20	335023	89797.4	53967.2	441310	0
A12	20	365745	97358.6	56248.7	471232	2501.15
B1	20	261334	67061.3	45993.4	388745	2010.21
B2	20	254413	63638.9	49269	394572	2179.61
B3	20	274103	65835.4	55680.7	417724	2066.52
B4	20	235358	53817.3	51591.6	377599	9636.06
B5	20	307303	72964.7	63662.1	427623	2814.35
B6	20	323000	69776	69306.2	458671	3172.05
B7	20	213779	49756.6	43841.4	300144	1967.38
B8	20	293501	67860.7	57293	382980	2253.72
B9	20	293769	67714.4	56891.1	396233	1655.05
B10	20	252559	58995.9	50570.3	369888	2061.67
B11	20	308162	75958.8	54476.5	411213	2058.88
B12	20	296946	76492.7	51741.7	425231	2093.58
C1	20	333492	88382	58235.2	458768	2950.22
C2	20	259637	63858	52842.9	395912	2341.25
C3	20	283693	65835.9	58480.8	405932	2738.17
C4	20	205847	43904.6	51103.3	357240	2432.11
C5	20	315939	69370	71598.1	467630	3188.23
C6	20	320692	67712.5	71642.3	454351	3117.86
C7	20	239090	57439.3	54639	357819	2090.06
C8	20	306919	73398.2	64442.5	414795	1758.34
C9	20	338185	80067.2	67011.7	439399	1791.11
C10	20	242045	55692.9	52935.6	376493	2271.68
C11	20	312653	79014.3	57494.3	421526	2038.4
C12	20	304732	80578	55601.1	442017	1976
D1	20	361111	92907.8	65037.4	495503	3166.09
D2	20	271894	68569.7	54790.1	395338	1618.32
D3	20	334801	79685.7	67560.2	444590	2487.49
D4	20	281720	77033.6	68868.9	445520	2255.25
D5	20	371146	87135.2	84607.1	516861	3966.96
D6	20	349036	80163.3	82123.4	490172	3514.93
D7	20	285388	66860.7	66660.5	407554	2754.62
D8	20	304617	70137.2	65796.8	406019	1828.9
D9	20	309996	71178.4	66306	417899	2451.93
D10	20	295500	73115.4	61702	415096	1546.78
D11	20	299344	76637.7	59078.2	425832	788.727
D12	20	333596	89498	63079.6	486226	2159.79
E1	20	377752	97934.7	73951.8	573362	3104.07
E2	20	313472	85666.7	69306.3	494822	2240.82
E3	20	361047	87590.4	82783.2	544982	2284.34
E4	20	325700	83012.1	78724.6	486073	2527.93
E5	20	399953	94093.6	93876.2	559301	3394.03
E6	20	388993	89668.6	94474.9	547822	3813.04
E7	20	292876	71466.6	71288	428960	2509.08
E8	20	398524	98060.1	85766.8	512815	2801.78
E9	20	362231	87990.7	76967.5	476847	2614.71
E10	20	300861	72032.6	65349.7	431712	1658.48
E11	20	319958	79020.2	63164.9	443731	1885.79
E12	20	350639	90917.7	66213.5	503264	1919.3
F1	20	385013	106128	78006.7	571198	2896.34
F2	20	308245	85542.6	67212.6	480034	1936.86
F3	20	407044	104999	90537.5	575486	3081.98
F4	20	339632	82509.9	79273.3	497328	2469.74
F5	20	471731	107213	109562	664457	3550.84
F6	20	390104	88722.1	93983.4	555845	3440.87
F7	20	325081	80501.6	79053.4	479423	2481.6
F8	20	380259	92672.8	84390.2	508931	3231.41
F9	20	433614	105849	90509.9	562808	3014.38
F10	20	350076	88046.4	73482.1	494480	1656.36
F11	20	347920	89004.2	67175.9	479685	464.792
F12	20	332431	87478.2	64899.3	506663	2016.33
G1	20	366683	94400.6	73030.2	580977	3070.36
G2	20	350259	95562.1	73907.7	535576	22237.4
G3	20	432755	104544	91456.3	622690	3610.15
G4	20	405985	106029	96913.6	632538	2898.18
G5	20	475176	113934	116014	727469	3591.27
G6	20	498610	121030	121116	737407	4378.42
G7	20	338678	82800.1	76712.5	470816	2380.97
G8	20	393489	94293.1	84127.9	520124	2636.3
G9	20	444089	105567	91430.8	577126	2974.48
G10	20	363137	93562.5	72668.9	496561	1267.97
G11	20	337948	89759.6	65583.9	469333	2237.41
G12	20	391279	107031	71983.6	567716	1977.86
H1	20	433404	112972	77560.1	629155	2940.81
H2	20	338636	88659.2	70140.7	539802	2384.62
H3	20	440622	106331	86091.4	594366	3677.32
H4	20	301005	25198.1	13509.7	11325.1	3366.49
H5	20	427926	37802	21114.6	17253.2	4583.36
H6	20	382679	33519.9	18638.5	14607.1	3890.63
H7	20	331175	83631.4	72282.4	473205	2411.34
H8	20	402088	99472.9	84577.3	553238	2880.4
H9	20	399309	98586.9	83524	563675	3332.93
H10	20	278988	22517	11612	9582.15	2325.2
H11	20	290138	23025.5	11210.8	9281.96	2677.45
H12	20	329819	24710.2	11614	9244.68	2464.05
A1	21	289937	76770.9	45814.5	416861	1851.91
A2	21	271347	68370.1	47691.7	400951	1769.89
A3	21	269445	63773.3	51200.7	411022	1746.92
A4	21	252976	58666.9	48672.6	368364	1509.64
A5	21	320126	75537.9	59724.3	424902	2286.84
A6	21	332838	69669.9	61258.4	424471	2450.75
A7	21	229517	52744.7	44734.4	324302	1517.02
A8	21	304397	67891.1	56396.7	405718	2281.48
A9	21	328675	74367.6	57674.6	419426	2760.76
A10	21	307437	75722.3	53447.1	408316	1922.3
A11	21	335602	89914.3	53955.7	442106	0
A12	21	366546	97608.9	56091.1	470838	2443.11
B1	21	261844	67359.6	46028.7	387726	1911.64
B2	21	254709	63868	49486.8	395137	2199.56
B3	21	273547	65946.3	55666.5	416920	2086.14
B4	21	235294	53978.7	51748.7	377522	9519.64
B5	21	307437	72720.4	63639.3	428383	3047.75
B6	21	322773	69738.9	69354.2	459270	3118.78
B7	21	213175	49961.6	43862.3	300232	2115.71
B8	21	292800	67744.6	57471.2	383074	1883.8
B9	21	293700	67676.2	56933	396553	1595.09
B10	21	252683	58599.4	50646.2	370396	1973.67
B11	21	307814	75944.2	54470.4	410883	2054.77
B12	21	296425	76414.9	51766.4	424937	2040.96
C1	21	333876	88002.2	58115.9	458404	2771.98
C2	21	259656	63906	52700.1	395237	2172.39
C3	21	283200	65819.1	58478.9	406527	2740.05
C4	21	206611	43987.6	51149	357265	2715.37
C5	21	316277	69530	71662.5	467663	2813.2
C6	21	321026	67583.7	71690.5	454503	3172.46
C7	21	239233	57723.9	54607.2	357570	2428.97
C8	21	307560	73380.9	64502.8	415186	1702.26
C9	21	338681	80053.7	67142	439543	1796.89
C10	21	242152	55474.4	53112.9	377015	2248.21
C11	21	313052	79325.4	57402.7	421926	2225.28
C12	21	304868	80086	55665.3	442096	1638.8
D1	21	360984	92841.2	65031.5	496299	2797.59
D2	21	271574	68555.3	54748.4	395015	1617.32
D3	21	335007	79846.9	67618.3	443535	2766.26
D4	21	281965	77174.4	68955	445767	2179.26
D5	21	370613	86946.6	84791.8	517199	3604.76
D6	21	349438	79848.3	82131	490283	3290.39
D7	21	285579	66749.6	66555.6	407190	2429.45
D8	21	305115	70408.5	65973.6	406357	1848.98
D9	21	309880	71070.5	66202.9	417995	2564.91
D10	21	296103	73081	61646.3	415850	1722.17
D11	21	299731	77326.8	58989.3	426665	587.453
D12	21	333580	89375.6	63010.7	485846	2205.25
E1	21	377776	98049.5	74277.6	574254	2944.15
E2	21	313025	85838.7	69481.6	494270	2205.53
E3	21	361538	87770.7	82576.6	544903	2548.93
E4	21	326489	83156	78704.7	486216	2842.1
E5	21	400609	93852.4	93935.2	559070	3175.35
E6	21	389862	89950.5	94481.8	547595	3754.44
E7	21	292682	71475.1	71250.6	428753	2254.37
E8	21	398596	98445.6	86211.6	512787	2915.73
E9	21	362591	88109.9	77092.4	476703	2614.71
E10	21	300444	71971.5	65206.9	432204	1921.44
E11	21	319642	79148.9	63267.9	443271	1770.06
E12	21	350854	90765.9	66162.2	502981	2193.83
F1	21	384203	105699	77997.6	570593	2788.08
F2	21	308377	85582.7	67118.3	480499	1857.28
F3	21	406617	105217	90559.8	575045	2796.2
F4	21	339418	82787.9	79252	497044	2272.32
F5	21	471370	107164	109489	663556	3341.84
F6	21	390283	88720.4	93838.2	555097	3563.97
F7	21	325015	80484.2	79149.7	479755	2581.06
F8	21	380397	93090.2	84137.2	509196	3187.89
F9	21	434329	105683	90279.6	562256	2965.85
F10	21	349632	88076.1	73671.3	494849	1526.33
F11	21	348149	89108.5	67402.3	479528	435.168
F12	21	332455	87484.9	64867.4	505802	2384.18
G1	21	366809	94417.1	72924.8	580632	2915.34
[truncated: 10,967 more rows]

## Sheet: Multicomponent Data
Block Type	96alum
Chemistry	SYBR_GREEN
Experiment File Name	D:\HAIFENG\89Untitled.eds
Experiment Run End Time	2021-08-29 16:18:57 PM CST
Instrument Type	sds7500
Passive Reference	ROX
Well	Cycle	SYBR	ROX
A1	1	285220	430534
A2	1	261553	404481
A3	1	265014	411870
A4	1	251371	372512
A5	1	315521	427197
A6	1	329210	424308
A7	1	231981	326187
A8	1	308763	409069
A9	1	332765	423687
A10	1	307792	415638
A11	1	337014	453622
A12	1	377848	492313
B1	1	262189	396062
B2	1	248824	397107
B3	1	266466	415732
B4	1	229325	373610
B5	1	300667	428469
B6	1	317869	455629
B7	1	213434	301324
B8	1	295917	383508
B9	1	295930	399619
B10	1	260819	374020
B11	1	311487	413724
B12	1	308744	433543
C1	1	330138	468358
C2	1	258113	399000
C3	1	276197	405713
C4	1	205790	355884
C5	1	309404	468632
C6	1	313951	450437
C7	1	237619	360827
C8	1	304555	416219
C9	1	334359	440200
C10	1	249948	375220
C11	1	308467	420945
C12	1	306198	444766
D1	1	363841	509360
D2	1	270414	402000
D3	1	326540	443313
D4	1	268553	442056
D5	1	363979	515743
D6	1	343110	489770
D7	1	286242	409636
D8	1	307291	406560
D9	1	313036	417335
D10	1	292334	411995
D11	1	295366	426038
D12	1	339042	493042
E1	1	373070	580407
E2	1	312676	497969
E3	1	351965	539928
E4	1	313786	484901
E5	1	389211	559374
E6	1	376799	547804
E7	1	293100	431588
E8	1	395240	514164
E9	1	362839	477185
E10	1	306773	432313
E11	1	322936	448059
E12	1	365382	515163
F1	1	388463	582403
F2	1	309668	486115
F3	1	400510	573385
F4	1	327966	497447
F5	1	463849	664517
F6	1	381844	554127
F7	1	325674	482416
F8	1	381551	512716
F9	1	431607	562629
F10	1	354612	494897
F11	1	341678	479468
F12	1	345688	517672
G1	1	366534	592276
G2	1	354848	536311
G3	1	422407	618678
G4	1	388003	626382
G5	1	464970	727991
G6	1	481778	734773
G7	1	343000	474092
G8	1	400102	526796
G9	1	452406	580561
G10	1	356231	494671
G11	1	331418	469598
G12	1	400281	581280
H1	1	437699	648341
H2	1	341820	553129
H3	1	439495	600841
H4	1
H5	1
H6	1
H7	1	339122	484781
H8	1	409686	567926
H9	1	409189	577045
H10	1
H11	1
H12	1
A1	2	286304	431335
A2	2	263142	403126
A3	2	264946	411614
A4	2	251474	371848
A5	2	316766	425987
A6	2	329806	425104
A7	2	231299	325384
A8	2	308127	408228
A9	2	331025	422340
A10	2	305219	413887
A11	2	335336	451281
A12	2	374262	492708
B1	2	261512	394988
B2	2	249483	396828
B3	2	267842	416524
B4	2	230207	374099
B5	2	302270	428452
B6	2	318762	455474
B7	2	213342	300853
B8	2	294913	383279
B9	2	294996	399230
B10	2	258850	373881
B11	2	310808	412786
B12	2	305861	432679
C1	2	331092	468065
C2	2	257763	399168
C3	2	276201	406353
C4	2	206312	356318
C5	2	310863	468800
C6	2	316325	451450
C7	2	236374	360441
C8	2	303318	416036
C9	2	334021	440839
C10	2	248129	375816
C11	2	308311	420785
C12	2	305712	444660
D1	2	362337	508334
D2	2	269946	401382
D3	2	328452	445234
D4	2	272249	442403
D5	2	365033	515869
D6	2	344484	489765
D7	2	284605	409194
D8	2	306932	406095
D9	2	312944	417921
D10	2	291356	412899
D11	2	293576	425150
D12	2	336055	492540
E1	2	373448	580205
E2	2	312822	497810
E3	2	353657	541436
E4	2	315899	485562
E5	2	391026	560387
E6	2	379356	548975
E7	2	291364	430989
E8	2	394413	514201
E9	2	362117	477106
E10	2	304266	433071
E11	2	322619	447602
E12	2	362316	513687
F1	2	388034	581288
F2	2	310361	487042
F3	2	403097	575930
F4	2	330018	498265
F5	2	465532	666322
F6	2	384720	557215
F7	2	322817	481456
F8	2	380171	512243
F9	2	431169	563207
F10	2	352183	496112
F11	2	340482	479771
F12	2	342948	516694
G1	2	366764	592554
G2	2	355323	537368
G3	2	424072	619643
G4	2	390428	628807
G5	2	465929	729186
G6	2	484345	736620
G7	2	342342	474553
G8	2	399838	526464
G9	2	451900	582149
G10	2	355621	495779
G11	2	331503	470452
G12	2	395988	581674
H1	2	439350	649592
H2	2	341984	552498
H3	2	440682	600932
H4	2
H5	2
H6	2
H7	2	336907	483359
H8	2	407712	566298
H9	2	407018	576272
H10	2
H11	2
H12	2
A1	3	286382	429155
A2	3	263866	402586
A3	3	264846	410318
A4	3	251465	370711
A5	3	317155	426040
A6	3	330147	424898
A7	3	229658	324362
A8	3	306347	406992
A9	3	329577	420817
A10	3	302954	410920
A11	3	332509	448168
A12	3	370669	488084
B1	3	260785	392124
B2	3	249205	396397
B3	3	268259	416623
B4	3	230367	375124
B5	3	303029	428525
B6	3	319339	456271
B7	3	213058	300639
B8	3	293854	383508
B9	3	294167	398580
B10	3	256243	370806
B11	3	309470	412177
B12	3	302153	428827
C1	3	330562	466279
C2	3	257819	399014
C3	3	277674	406991
C4	3	206724	356476
C5	3	311964	469345
C6	3	317048	452070
C7	3	236183	359892
C8	3	303359	416637
C9	3	333601	441448
C10	3	247138	376018
C11	3	308224	420792
C12	3	304155	444485
D1	3	360755	504418
D2	3	269277	400415
D3	3	329498	445844
D4	3	273381	443323
D5	3	366175	517162
D6	3	346191	490390
D7	3	284721	408846
D8	3	306239	406704
D9	3	312531	418591
D10	3	290989	413882
D11	3	294150	425722
D12	3	332545	489307
E1	3	373967	577914
E2	3	313104	498366
E3	3	354976	542155
E4	3	317336	486381
E5	3	392255	561771
E6	3	380248	550440
E7	3	290242	430999
E8	3	394627	514576
E9	3	360947	477749
E10	3	304087	433718
E11	3	322473	448208
E12	3	358652	511327
F1	3	387154	579251
F2	3	309123	484991
F3	3	404765	576634
F4	3	331413	499120
F5	3	465757	667018
F6	3	385761	556261
F7	3	322553	481418
F8	3	379580	512557
F9	3	430590	563796
F10	3	350470	496232
F11	3	340015	480360
F12	3	339693	512433
G1	3	366647	590038
G2	3	356878	537507
G3	3	425334	620154
G4	3	391658	631255
G5	3	466580	729550
G6	3	486555	739315
G7	3	341950	474750
G8	3	399271	526180
G9	3	451345	582335
G10	3	355209	496300
G11	3	330783	471225
G12	3	392847	577436
H1	3	438714	647666
H2	3	342554	550067
H3	3	440097	599024
H4	3
H5	3
H6	3
H7	3	335566	481139
H8	3	405641	564458
H9	3	404881	573197
H10	3
H11	3
H12	3
A1	4	287367	428190
A2	4	264928	402059
A3	4	265992	411112
A4	4	251340	370333
A5	4	318161	425591
A6	4	331318	424997
A7	4	229653	324244
A8	4	306025	406663
A9	4	329919	420918
A10	4	301905	410986
A11	4	332082	447785
A12	4	369596	485763
B1	4	260348	392078
B2	4	250238	396911
B3	4	269144	417543
B4	4	231496	375795
B5	4	304071	429319
B6	4	320326	457391
B7	4	213077	301364
B8	4	294347	383638
B9	4	294740	398735
B10	4	256155	370966
B11	4	310034	412093
B12	4	301180	427759
C1	4	331869	465531
C2	4	257980	398685
C3	4	278732	407617
C4	4	206616	357235
C5	4	312752	469227
C6	4	318225	453794
C7	4	235941	360110
C8	4	303560	417417
C9	4	333515	441854
C10	4	246808	376651
C11	4	309545	421899
C12	4	303773	443852
D1	4	360852	503007
D2	4	269925	400370
D3	4	330920	446501
D4	4	274856	444049
D5	4	367775	517891
D6	4	347154	490975
D7	4	284754	408968
D8	4	306485	407496
D9	4	312658	418763
D10	4	292007	414861
D11	4	294384	426235
D12	4	331988	488908
E1	4	373507	577470
E2	4	313615	498044
E3	4	355782	543805
E4	4	318844	487969
E5	4	393802	562194
E6	4	382830	551022
E7	4	290336	430971
E8	4	393987	515151
E9	4	360782	478115
E10	4	304739	434054
E11	4	323428	448377
E12	4	357674	509966
F1	4	387255	577330
F2	4	308894	485065
F3	4	405171	577438
F4	4	333144	500303
F5	4	466798	667293
F6	4	386877	557830
F7	4	322661	481662
F8	4	379573	512889
F9	4	431334	564875
F10	4	351026	497086
F11	4	340526	481765
F12	4	338063	512339
G1	4	365955	587875
G2	4	357321	537891
G3	4	427412	622396
G4	4	393590	631974
G5	4	467548	730400
G6	4	487659	739502
G7	4	340946	474792
G8	4	398595	526661
G9	4	451095	582446
G10	4	355982	497408
G11	4	330423	471365
G12	4	391238	575752
H1	4	439043	646332
H2	4	341466	548069
H3	4	440756	598050
H4	4
H5	4
H6	4
H7	4	334372	480288
H8	4	404648	562768
H9	4	404043	572072
H10	4
H11	4
H12	4
A1	5	287286	426062
A2	5	265941	402353
A3	5	266509	410971
A4	5	251687	370108
A5	5	319377	425353
A6	5	331490	425036
A7	5	229666	324239
A8	5	305989	406424
A9	5	330311	420954
A10	5	303080	410580
A11	5	333198	446759
A12	5	368768	484126
B1	5	261759	391053
B2	5	252341	396585
B3	5	269678	417624
B4	5	232242	376576
B5	5	304816	429557
B6	5	320639	458140
B7	5	213697	300671
B8	5	295252	383639
B9	5	295120	398888
B10	5	255892	371187
B11	5	310290	412470
B12	5	300984	427715
C1	5	332496	465390
C2	5	258597	399043
C3	5	279442	407895
C4	5	206981	357318
C5	5	314074	469862
C6	5	319138	454234
C7	5	236604	360446
C8	5	303696	417881
C9	5	334759	442174
C10	5	246407	377233
C11	5	310104	422614
C12	5	304345	443469
D1	5	361262	502859
D2	5	270371	400855
D3	5	332284	446842
D4	5	276318	444572
D5	5	368997	518831
D6	5	347730	491334
D7	5	285134	409330
D8	5	307093	407736
D9	5	313256	419441
D10	5	292424	415295
D11	5	295216	426999
D12	5	332823	488934
E1	5	375300	576993
E2	5	314576	498424
E3	5	357165	544568
E4	5	320197	488732
E5	5	394981	563151
E6	5	384317	552143
E7	5	290615	430758
E8	5	395195	515448
E9	5	361132	478672
E10	5	304563	434547
E11	5	323857	448247
E12	5	357064	509722
F1	5	387154	576675
F2	5	310364	485482
F3	5	406211	578882
F4	5	334209	500055
F5	5	468643	667693
F6	5	387932	558167
F7	5	322873	481413
F8	5	379736	513252
F9	5	431276	565054
F10	5	351752	498031
F11	5	342136	482240
F12	5	337531	510873
G1	5	366474	586827
G2	5	357492	538702
G3	5	428654	623178
G4	5	395361	632557
G5	5	468611	732563
G6	5	489234	740765
G7	5	341587	474749
G8	5	399112	527016
G9	5	451602	582622
G10	5	357031	497711
G11	5	331619	471178
G12	5	389981	574816
H1	5	439520	645370
H2	5	342484	547292
H3	5	442242	597396
H4	5
H5	5
H6	5
H7	5	334182	478713
H8	5	404371	561728
H9	5	403886	571658
H10	5
H11	5
H12	5
A1	6	288630	425795
A2	6	266996	402271
A3	6	267242	411262
A4	6	252385	369905
A5	6	319701	425477
A6	6	332408	425468
A7	6	230516	324703
A8	6	306684	406893
A9	6	329896	421470
A10	6	303550	410604
A11	6	333522	446693
A12	6	369327	483528
B1	6	261886	390991
B2	6	252846	397091
B3	6	271136	418000
B4	6	233083	377262
B5	6	305907	429572
B6	6	322109	458292
B7	6	214111	301177
B8	6	295132	383771
B9	6	295479	398830
B10	6	256129	371400
B11	6	310643	412282
B12	6	301230	427444
C1	6	333998	464910
C2	6	259335	399233
C3	6	280415	408409
C4	6	207425	357391
C5	6	314712	469714
C6	6	319836	454674
C7	6	237218	360231
C8	6	304666	417661
C9	6	335396	442343
C10	6	246685	376864
C11	6	311474	422506
C12	6	304862	443566
D1	6	361949	502351
D2	6	271184	400020
D3	6	333312	447273
D4	6	277364	445257
D5	6	369977	518596
D6	6	348699	491354
D7	6	285744	409443
D8	6	307538	408164
D9	6	313676	419396
D10	6	293868	415880
D11	6	295880	427585
D12	6	332757	488522
E1	6	376199	576678
E2	6	315196	498493
E3	6	358446	545087
E4	6	321653	489306
E5	6	396802	563623
E6	6	385462	551782
E7	6	291219	431477
E8	6	395639	515964
E9	6	362199	478962
E10	6	304886	435013
E11	6	324051	448698
E12	6	356644	508581
F1	6	388862	576154
F2	6	310449	485227
F3	6	407434	579297
F4	6	335404	500798
F5	6	469586	668920
F6	6	389256	558404
F7	6	323699	481722
F8	6	379897	513714
F9	6	431896	565392
F10	6	352802	497827
F11	6	342756	482448
F12	6	337280	510495
G1	6	367208	586282
G2	6	357716	539184
G3	6	430244	623954
G4	6	396862	633729
G5	6	469500	731447
G6	6	490672	741133
G7	6	341829	474834
G8	6	399250	526515
G9	6	452212	583000
G10	6	357941	498632
G11	6	333101	471589
G12	6	390169	574218
H1	6	439536	643627
H2	6	342518	546151
H3	6	443041	597190
H4	6
H5	6
H6	6
H7	6	334165	478435
H8	6	403956	561177
H9	6	403412	571180
H10	6
H11	6
H12	6
A1	7	289563	424679
A2	7	268236	402118
A3	7	267786	411414
A4	7	253346	370132
A5	7	321132	426246
A6	7	333095	425444
A7	7	230732	325014
A8	7	307111	406945
A9	7	330466	421003
A10	7	304040	410306
A11	7	334888	445755
A12	7	370055	481861
B1	7	262731	391024
B2	7	253742	397487
B3	7	271550	418161
B4	7	233974	377360
B5	7	307008	429797
B6	7	322059	458820
B7	7	214294	301270
B8	7	295921	384088
B9	7	296043	398768
B10	7	256127	371672
B11	7	311406	412237
B12	7	300854	427081
C1	7	335196	464626
C2	7	260096	398855
C3	7	281223	408238
C4	7	207995	357420
C5	7	315899	469867
C6	7	320774	455142
C7	7	237781	360102
C8	7	305466	417277
C9	7	336005	442396
C10	7	246830	377429
C11	7	312293	422759
C12	7	305555	443826
D1	7	362806	501502
D2	7	271401	399920
D3	7	334195	446860
D4	7	278796	445523
D5	7	371164	519223
D6	7	349379	492080
D7	7	286372	409666
D8	7	307919	408097
D9	7	313995	419564
D10	7	294902	416073
D11	7	297573	427393
D12	7	333755	488176
E1	7	377224	576613
E2	7	315797	497918
E3	7	359522	545548
E4	7	323272	488951
E5	7	398380	563108
E6	7	386401	552722
E7	7	292344	431614
E8	7	396587	516369
E9	7	362441	479117
E10	7	304875	435201
E11	7	324630	448438
E12	7	357311	507619
F1	7	388402	575742
F2	7	311653	484683
F3	7	408465	579300
F4	7	335866	500024
F5	7	470609	668363
F6	7	390607	558912
F7	7	325008	481676
F8	7	380979	513228
F9	7	433749	566169
F10	7	353788	498346
F11	7	343890	481994
F12	7	338616	509582
G1	7	367633	585041
G2	7	357547	538864
G3	7	431164	624290
G4	7	398617	633877
G5	7	470737	731708
G6	7	492145	742210
G7	7	342565	474853
G8	7	399631	526695
G9	7	451894	583378
G10	7	360224	498291
G11	7	334018	472013
G12	7	390914	572933
H1	7	440754	642460
H2	7	343634	545544
H3	7	443374	597487
H4	7
H5	7
H6	7
H7	7	334489	477904
H8	7	405019	560432
H9	7	403888	570091
H10	7
H11	7
H12	7
A1	8	289405	424247
A2	8	268660	402632
A3	8	268727	411653
A4	8	253025	369934
A5	8	321290	426117
A6	8	333432	425567
A7	8	231136	324615
A8	8	307689	407234
A9	8	331530	421520
A10	8	305206	410548
A11	8	335122	445789
A12	8	369789	481219
B1	8	262470	390712
B2	8	254193	397353
B3	8	272437	418363
B4	8	234602	377603
B5	8	307394	429559
B6	8	323233	458876
B7	8	214876	301529
B8	8	296232	384034
B9	8	296300	399025
B10	8	256933	371119
B11	8	311719	411851
B12	8	301576	426950
C1	8	335205	464453
C2	8	260726	398608
C3	8	281629	408109
C4	8	208219	357725
C5	8	316382	469765
C6	8	321168	455611
C7	8	238226	360054
C8	8	306107	417993
C9	8	336820	442324
C10	8	246844	377522
C11	8	313146	422749
C12	8	305331	443405
D1	8	363429	501075
D2	8	272757	399539
D3	8	335575	447438
D4	8	279567	445686
D5	8	371425	519027
D6	8	350247	492103
D7	8	286842	410076
D8	8	307903	408240
D9	8	313722	420172
D10	8	295364	416305
D11	8	298363	427593
D12	8	334409	488260
E1	8	377668	575983
E2	8	316662	498801
E3	8	360108	545680
E4	8	323884	488620
E5	8	398853	563648
E6	8	387180	552376
E7	8	292722	431456
E8	8	398018	516139
E9	8	363410	479265
E10	8	304825	434885
E11	8	324773	448346
E12	8	357325	508378
F1	8	389128	576334
F2	8	311657	485497
F3	8	408983	579447
F4	8	337377	500414
F5	8	471899	668416
F6	8	391051	558418
F7	8	325222	482144
F8	8	381376	512736
F9	8	434014	565445
F10	8	353807	498339
F11	8	344859	482226
F12	8	338079	510858
G1	8	367419	584703
G2	8	358710	538787
G3	8	432245	624754
G4	8	399861	632048
G5	8	471989	731685
G6	8	493458	741966
G7	8	343021	474469
G8	8	399795	525852
G9	8	452177	582354
G10	8	361368	498056
G11	8	334696	472065
G12	8	391357	572836
H1	8	439802	640640
H2	8	343285	544440
H3	8	444152	597385
H4	8
H5	8
H6	8
H7	8	335006	478013
H8	8	405017	559935
H9	8	404175	569540
H10	8
H11	8
H12	8
A1	9	290276	423318
A2	9	269286	401969
A3	9	269338	411584
A4	9	253228	370013
A5	9	322368	426139
A6	9	333970	425773
A7	9	231340	324862
A8	9	307482	407005
A9	9	330681	421224
A10	9	305858	410510
A11	9	336045	445266
A12	9	370384	480177
B1	9	262265	390713
B2	9	255027	396775
B3	9	272611	418342
B4	9	234833	377584
B5	9	308652	429926
B6	9	323505	459047
B7	9	214883	301314
B8	9	296712	384153
B9	9	296307	398918
B10	9	256762	371277
B11	9	311751	412671
B12	9	301953	426522
C1	9	336027	462692
C2	9	261384	398323
C3	9	282830	407876
C4	9	208438	358162
C5	9	317033	469707
C6	9	321963	454992
C7	9	238684	359828
C8	9	306637	417243
C9	9	338231	442070
C10	9	246341	377269
C11	9	313708	422531
C12	9	306310	443568
D1	9	363924	500558
D2	9	272888	399217
D3	9	335542	447356
D4	9	280188	445646
D5	9	372649	519475
D6	9	350692	492134
D7	9	287229	409637
D8	9	308325	408020
D9	9	314546	419506
D10	9	296491	416037
D11	9	299425	427391
D12	9	335163	488230
E1	9	379247	576146
E2	9	317279	498070
E3	9	361189	546101
E4	9	324415	488691
E5	9	399794	563493
E6	9	388089	551701
E7	9	293695	431647
E8	9	398796	515621
E9	9	364285	478936
E10	9	304940	435022
E11	9	325128	447631
E12	9	357791	506949
F1	9	389156	575292
F2	9	311743	484674
F3	9	409871	579745
F4	9	338052	500133
F5	9	472913	668667
F6	9	391424	558125
F7	9	325559	482521
F8	9	381779	512878
F9	9	435027	565953
F10	9	354993	497829
F11	9	345189	482146
F12	9	338547	508967
G1	9	369367	583982
G2	9	358245	539194
G3	9	432862	624499
G4	9	401243	634069
G5	9	472612	732642
G6	9	494648	742080
G7	9	342895	474441
G8	9	399197	526254
G9	9	452787	582511
G10	9	362899	498547
G11	9	335340	472158
G12	9	392107	572184
H1	9	440589	639775
H2	9	343418	544429
H3	9	444708	596431
H4	9
H5	9
H6	9
H7	9	334483	477535
H8	9	405945	559266
H9	9	403859	569599
H10	9
H11	9
H12	9
A1	10	290423	422920
A2	10	270181	401837
A3	10	269667	411647
A4	10	253791	370153
A5	10	322302	426235
A6	10	334353	425658
A7	10	231901	324886
A8	10	307897	407097
A9	10	331759	421187
A10	10	307142	410036
A11	10	337370	444709
A12	10	371234	478783
B1	10	263746	390371
B2	10	255883	397001
B3	10	274023	418353
B4	10	235615	377784
B5	10	308817	429235
B6	10	323992	458839
B7	10	215265	300688
B8	10	296384	384488
B9	10	296687	398848
B10	10	256822	371467
B11	10	312218	412612
B12	10	301758	426420
C1	10	336018	462720
C2	10	261466	398250
C3	10	283292	408085
C4	10	208486	358179
C5	10	317657	469770
C6	10	321822	455100
C7	10	239412	359974
C8	10	307890	418048
C9	10	338535	442118
C10	10	247130	377050
C11	10	314201	423014
C12	10	307092	443407
D1	10	364908	499725
D2	10	273584	399277
D3	10	335952	446653
D4	10	281174	445820
D5	10	372990	519085
D6	10	351278	491889
D7	10	287213	409210
D8	10	308230	407659
D9	10	313928	419758
D10	10	297021	416156
D11	10	299819	427478
D12	10	335717	488477
E1	10	379882	575698
E2	10	317566	497485
E3	10	362207	546544
E4	10	325709	489485
E5	10	400692	563648
E6	10	388250	551611
E7	10	294010	430723
E8	10	399882	515754
E9	10	365237	479355
E10	10	305539	434753
E11	10	325072	448047
E12	10	357380	507708
F1	10	389752	574651
F2	10	312155	484452
F3	10	410362	579414
F4	10	338983	500420
F5	10	473258	667813
F6	10	391964	557850
F7	10	327011	481906
F8	10	382681	512518
F9	10	436249	565882
F10	10	355561	498106
F11	10	346472	482060
F12	10	338714	509191
G1	10	369342	583712
G2	10	358081	538652
G3	10	434099	624923
G4	10	403196	634252
G5	10	473474	731565
G6	10	496726	741691
G7	10	343592	474118
G8	10	399655	525337
G9	10	452996	581560
G10	10	363720	498699
G11	10	336667	472060
G12	10	392668	570679
H1	10	440981	639230
H2	10	343706	543414
H3	10	444200	596462
H4	10
H5	10
H6	10
H7	10	335548	476670
H8	10	406299	558408
H9	10	405004	569097
H10	10
H11	10
H12	10
A1	11	291448	421968
A2	11	271117	401787
A3	11	269424	411423
A4	11	254361	369810
A5	11	322711	426312
A6	11	334178	425673
A7	11	231603	324518
A8	11	308370	406904
A9	11	331703	421315
A10	11	307977	410183
A11	11	337566	445210
A12	11	371301	478084
B1	11	263758	389875
B2	11	256021	396904
B3	11	274465	418492
B4	11	235299	378089
B5	11	309123	429747
B6	11	324244	459116
B7	11	215263	300779
B8	11	296751	384113
B9	11	297041	398704
B10	11	256564	370936
B11	11	312355	412672
B12	11	302305	427048
C1	11	337078	462200
C2	11	261890	398407
C3	11	283534	408276
C4	11	208490	357374
C5	11	317849	469029
C6	11	322136	455235
C7	11	239929	359821
C8	11	308202	417356
C9	11	339564	441945
C10	11	246869	377352
C11	11	314911	422589
C12	11	307363	443360
D1	11	365076	500143
D2	11	274079	398875
D3	11	336931	447258
D4	11	281765	445975
D5	11	373285	519237
D6	11	352127	491940
D7	11	286993	409557
D8	11	308688	407638
D9	11	314223	419842
D10	11	297112	417378
D11	11	300283	426916
D12	11	336005	488118
E1	11	379490	575778
E2	11	318009	497164
E3	11	362232	545869
E4	11	326518	488507
E5	11	401604	563076
E6	11	389279	551908
E7	11	294717	431094
E8	11	400409	515304
E9	11	365468	479296
E10	11	305227	434772
E11	11	325277	447168
E12	11	357390	506879
F1	11	389861	574743
F2	11	312705	484191
F3	11	411078	579366
F4	11	339708	500597
F5	11	474245	668480
F6	11	392609	559055
F7	11	327451	481784
F8	11	383428	511848
F9	11	437131	565474
F10	11	355842	497993
F11	11	347335	481448
F12	11	339160	508350
G1	11	370536	583320
G2	11	357968	538111
G3	11	434713	625312
G4	11	404168	634252
G5	11	474635	730457
G6	11	497740	742816
G7	11	343114	474343
G8	11	399581	525292
G9	11	452035	581787
G10	11	364331	498102
G11	11	338356	472187
G12	11	393651	570502
H1	11	441737	638152
H2	11	343788	543322
H3	11	445051	596714
H4	11
H5	11
H6	11
H7	11	335473	476711
H8	11	406502	558050
H9	11	405133	568325
H10	11
H11	11
H12	11
A1	12	291636	421813
A2	12	271704	401778
A3	12	270082	411671
A4	12	254635	369630
A5	12	323125	425778
A6	12	335221	426248
A7	12	232285	324844
A8	12	307742	406887
A9	12	332539	420828
A10	12	308420	410323
A11	12	338614	444612
A12	12	371656	476553
B1	12	264545	389955
B2	12	256396	396251
B3	12	274835	418333
B4	12	236100	377608
B5	12	309775	429071
B6	12	324802	458810
B7	12	215472	301051
B8	12	297050	383772
B9	12	297081	398474
B10	12	256774	370858
B11	12	312905	412063
B12	12	301463	426740
C1	12	337716	462121
C2	12	262050	397967
C3	12	284457	407751
C4	12	208676	357909
C5	12	318132	469331
C6	12	322551	455168
C7	12	240427	359010
C8	12	309005	417274
C9	12	339998	441678
C10	12	247018	377447
C11	12	315568	422414
C12	12	308225	443812
D1	12	364675	499686
D2	12	274338	398192
D3	12	337027	446639
D4	12	282656	446075
D5	12	373935	519306
D6	12	351849	491684
D7	12	287729	409201
D8	12	308841	407452
D9	12	314269	420005
D10	12	298228	416869
D11	12	301450	427488
D12	12	337448	488195
E1	12	380860	575858
E2	12	317910	496897
E3	12	363418	546091
E4	12	326548	488400
E5	12	402473	562731
E6	12	390237	551621
E7	12	295486	431755
E8	12	401304	515498
E9	12	366362	478646
E10	12	305023	434840
E11	12	325266	447390
E12	12	357162	506045
F1	12	389138	573963
F2	12	313138	484014
F3	12	410892	579277
F4	12	340669	499786
F5	12	473989	668125
F6	12	392800	557383
F7	12	327933	481648
F8	12	383991	511829
F9	12	437594	565372
F10	12	356176	497260
F11	12	347975	482116
F12	12	339257	508086
G1	12	370185	583392
G2	12	358626	538457
G3	12	434948	624832
G4	12	405707	634245
G5	12	475903	732858
G6	12	499500	740676
G7	12	343518	474007
G8	12	399564	524736
G9	12	452479	581300
G10	12	365262	498694
G11	12	339052	471626
G12	12	394232	570462
H1	12	441467	636713
H2	12	344419	542799
H3	12	445410	596231
H4	12
H5	12
H6	12
H7	12	336352	476222
H8	12	407434	557492
H9	12	404953	568217
H10	12
H11	12
H12	12
A1	13	291913	420881
A2	13	271807	402224
A3	13	270898	411396
A4	13	254750	369177
A5	13	323238	426410
A6	13	335048	425077
A7	13	232139	324655
A8	13	308691	407121
A9	13	332775	420407
A10	13	310053	409905
A11	13	339769	444260
A12	13	372586	476082
B1	13	264335	389659
B2	13	256522	396549
B3	13	275338	418046
B4	13	236362	377915
B5	13	310275	429331
B6	13	324743	459106
B7	13	215496	300477
B8	13	297429	383778
B9	13	297296	398421
B10	13	257153	370694
B11	13	312675	412411
B12	13	301721	426418
C1	13	337437	461247
C2	13	262129	397803
C3	13	284433	408454
C4	13	208428	357760
C5	13	318679	468920
C6	13	323298	455654
C7	13	240690	359515
C8	13	309154	416821
C9	13	340807	441652
C10	13	247170	377207
C11	13	315745	422627
C12	13	308284	443442
D1	13	365586	499363
D2	13	274744	398127
D3	13	337391	446306
D4	13	283482	446723
D5	13	374195	518703
D6	13	352071	491797
D7	13	287465	408880
D8	13	308893	407712
D9	13	314575	419843
D10	13	298586	416231
D11	13	302305	427560
D12	13	337724	488324
E1	13	381043	574801
E2	13	318698	497373
E3	13	364252	546565
E4	13	327124	488230
E5	13	402852	562774
E6	13	390813	551800
E7	13	295519	431193
E8	13	402238	515209
E9	13	366332	479148
E10	13	304868	434281
E11	13	325093	447053
E12	13	357326	506213
F1	13	390651	573729
F2	13	313080	483639
F3	13	410728	579112
F4	13	340751	500118
F5	13	474916	667720
F6	13	393018	557725
F7	13	328267	481365
F8	13	384469	512859
F9	13	438128	565211
F10	13	355811	497228
F11	13	349012	482319
F12	13	339039	508765
G1	13	370857	582791
G2	13	358224	538556
G3	13	435911	624480
G4	13	406640	634608
G5	13	477183	732181
G6	13	499888	741642
G7	13	343548	473653
G8	13	399700	524237
G9	13	452389	581505
G10	13	366295	498558
G11	13	339756	471945
G12	13	394691	570250
H1	13	442056	636684
H2	13	344715	542666
H3	13	445860	596094
H4	13
H5	13
H6	13
H7	13	336477	476416
H8	13	407268	557180
H9	13	406066	567639
H10	13
H11	13
H12	13
A1	14	291726	420956
A2	14	271754	401757
A3	14	270718	410884
A4	14	255272	369710
A5	14	323196	426207
A6	14	335249	425152
A7	14	232115	324652
A8	14	308397	406817
A9	14	332554	420320
A10	14	310213	409778
A11	14	339500	444143
A12	14	371883	475206
B1	14	264888	389884
B2	14	256497	396355
B3	14	275787	417946
B4	14	236942	377712
B5	14	310531	428906
B6	14	325550	459412
B7	14	216027	300519
B8	14	297400	383708
B9	14	297287	397931
B10	14	256856	370687
B11	14	312683	412156
B12	14	301823	426350
C1	14	337809	460973
C2	14	262706	397829
C3	14	284761	407631
C4	14	208597	357986
C5	14	318884	469338
C6	14	323325	455360
C7	14	241030	359189
C8	14	310070	416407
C9	14	341241	440921
C10	14	246709	377375
C11	14	316936	422741
C12	14	308815	443317
D1	14	365504	498614
D2	14	274466	397655
D3	14	338036	446758
D4	14	283483	446216
D5	14	374596	519009
D6	14	352091	491553
D7	14	288034	408840
D8	14	308639	407905
D9	14	314041	419552
D10	14	298705	416565
D11	14	302407	427490
D12	14	337622	487860
E1	14	381522	574849
E2	14	318664	496531
E3	14	363942	546364
E4	14	327457	488164
E5	14	403254	562482
E6	14	391695	551482
E7	14	295957	431450
E8	14	402844	515349
E9	14	366488	479211
E10	14	304103	434482
E11	14	325188	446345
E12	14	357275	505833
F1	14	390510	574036
F2	14	312993	483431
F3	14	411367	578632
F4	14	341571	499856
F5	14	475371	667979
F6	14	393492	556965
F7	14	328570	481467
F8	14	384632	511793
F9	14	438250	564794
F10	14	356292	497119
F11	14	349393	481583
F12	14	339453	507869
G1	14	371467	582649
G2	14	357868	537492
G3	14	435625	625494
G4	14	407785	633820
G5	14	478021	731467
G6	14	501314	740691
G7	14	343996	473591
G8	14	399292	524329
G9	14	451781	581207
G10	14	366925	498751
G11	14	340140	471668
G12	14	394860	570023
H1	14	441360	634994
H2	14	344112	542757
H3	14	446063	596019
H4	14
H5	14
H6	14
H7	14	336502	475617
H8	14	407232	556560
H9	14	405529	567060
H10	14
H11	14
H12	14
A1	15	292952	420158
A2	15	272830	401596
A3	15	271566	411100
A4	15	254828	369417
A5	15	324090	426072
A6	15	335297	425556
A7	15	231856	324939
A8	15	308254	406826
A9	15	332680	420403
A10	15	309749	409311
A11	15	339702	443561
A12	15	372194	474680
B1	15	265036	389689
B2	15	257183	395942
B3	15	275975	418072
B4	15	237114	377888
B5	15	310823	429146
B6	15	325642	459303
B7	15	215657	301158
B8	15	297264	383672
B9	15	297411	397936
B10	15	256454	370846
B11	15	312703	411915
B12	15	301608	426177
C1	15	338530	460366
C2	15	262823	397741
C3	15	285095	407829
C4	15	208654	357384
C5	15	319035	468510
C6	15	323215	455598
C7	15	241553	358895
C8	15	310065	416833
C9	15	341478	441604
C10	15	246683	377041
C11	15	316277	422680
C12	15	308943	443043
D1	15	365570	497781
D2	15	274864	397734
D3	15	337388	446470
D4	15	284353	446814
D5	15	374611	518870
D6	15	352733	491968
D7	15	287772	408679
D8	15	308683	407670
D9	15	314183	419635
D10	15	299023	416308
D11	15	302424	427244
D12	15	338461	487628
E1	15	382531	574687
E2	15	318432	495988
E3	15	364605	545733
E4	15	328169	487955
E5	15	403176	562422
E6	15	391394	551122
E7	15	296230	431241
E8	15	403011	515325
E9	15	366637	478933
E10	15	304665	434091
E11	15	325008	446454
E12	15	357159	507044
F1	15	391335	573538
F2	15	313503	482636
F3	15	411691	578951
F4	15	342006	499232
F5	15	475871	667111
F6	15	393642	558823
F7	15	328822	481643
F8	15	385340	511747
F9	15	439082	565273
F10	15	356097	496909
F11	15	349164	481595
F12	15	339427	508963
G1	15	371392	582103
G2	15	358311	537980
G3	15	436287	624455
G4	15	408510	634330
G5	15	478649	731957
G6	15	502159	741894
G7	15	343348	473319
G8	15	398924	523599
G9	15	452039	581100
G10	15	366932	498070
G11	15	341055	471457
G12	15	395681	570177
H1	15	442092	634487
H2	15	344024	542054
H3	15	445853	595906
H4	15
H5	15
H6	15
H7	15	337093	475999
H8	15	408181	556188
H9	15	405796	567006
H10	15
H11	15
H12	15
A1	16	292297	419865
A2	16	273119	401778
A3	16	270713	411451
A4	16	255220	369523
A5	16	323506	425857
A6	16	335246	425160
A7	16	231869	324577
A8	16	308500	407013
A9	16	332680	420271
A10	16	310804	409670
A11	16	340970	443548
A12	16	371801	474249
B1	16	265143	389449
B2	16	257372	395944
B3	16	276254	417864
B4	16	237566	377736
B5	16	311682	429960
B6	16	325731	459217
B7	16	216049	300602
B8	16	297094	383798
B9	16	297551	398207
B10	16	256294	370611
B11	16	312142	412194
B12	16	302022	426160
C1	16	338619	460293
C2	16	263164	397088
C3	16	285713	407579
C4	16	208617	358081
C5	16	319172	468970
C6	16	323749	455289
C7	16	241787	358650
C8	16	310546	416482
C9	16	341761	440969
C10	16	246695	376924
C11	16	316665	422284
C12	16	308955	443186
D1	16	366203	498242
D2	16	275171	397494
D3	16	338209	446189
D4	16	284567	446328
D5	16	374813	518675
D6	16	352800	491536
D7	16	288039	409029
D8	16	309048	407372
D9	16	313768	419851
D10	16	299511	416413
D11	16	302976	427381
D12	16	338561	487282
E1	16	382054	574702
E2	16	319190	496116
E3	16	364634	546066
E4	16	328944	487625
E5	16	404218	562368
E6	16	391761	550408
E7	16	296259	430860
E8	16	403659	514903
E9	16	366861	479031
E10	16	304406	434479
E11	16	324998	445953
E12	16	357187	504394
F1	16	390760	573494
F2	16	313429	482323
F3	16	412222	578063
F4	16	342574	499840
F5	16	476530	666708
F6	16	394510	556839
F7	16	329111	481563
F8	16	384796	512065
F9	16	438998	565469
F10	16	355555	496366
F11	16	350051	481285
F12	16	338822	507034
G1	16	371639	582152
G2	16	357101	537414
G3	16	436855	624787
G4	16	409504	634409
G5	16	479455	730813
G6	16	502897	740757
G7	16	343378	473106
G8	16	399157	523415
G9	16	451916	580700
G10	16	367566	498959
G11	16	341060	471783
G12	16	395772	569970
H1	16	440954	633662
H2	16	344463	541990
H3	16	446333	596011
H4	16
H5	16
H6	16
H7	16	336787	475678
H8	16	407982	556068
H9	16	406092	567132
H10	16
H11	16
H12	16
A1	17	292580	418986
A2	17	273777	402057
A3	17	271910	411348
A4	17	255021	369473
A5	17	324374	426368
A6	17	335899	425800
A7	17	232265	324532
A8	17	308668	407140
A9	17	333141	420235
A10	17	310747	409482
A11	17	340311	443486
A12	17	372294	473674
B1	17	265160	389063
B2	17	257689	395747
B3	17	277073	417783
B4	17	237567	377593
B5	17	311238	429155
B6	17	326163	459047
B7	17	216010	300518
B8	17	297180	383537
B9	17	297285	397573
B10	17	256471	370667
B11	17	311904	412062
B12	17	301815	425799
C1	17	338772	460230
C2	17	262890	396766
C3	17	285201	407313
C4	17	208823	357818
C5	17	319562	468837
C6	17	323270	455517
C7	17	241694	358872
C8	17	310849	416338
C9	17	341898	440848
C10	17	246341	377092
C11	17	317111	422654
C12	17	309629	443152
D1	17	366285	497532
D2	17	275769	396963
D3	17	338431	445725
D4	17	285615	446742
D5	17	375681	518737
D6	17	353163	491824
D7	17	287982	409487
D8	17	308806	407775
D9	17	313850	419682
D10	17	299195	416587
D11	17	303519	427414
D12	17	338990	487522
E1	17	383195	575187
E2	17	319081	495613
E3	17	364811	546086
E4	17	329212	487673
E5	17	404434	561515
E6	17	392846	550512
E7	17	296782	430588
E8	17	403973	514806
E9	17	367084	478874
E10	17	303997	434325
E11	17	324995	445844
E12	17	357124	505330
F1	17	391168	572948
F2	17	313799	482709
F3	17	411950	578424
F4	17	342832	498721
F5	17	476369	667162
F6	17	394289	558480
F7	17	329039	481388
F8	17	385880	511919
F9	17	439417	565065
F10	17	356637	496358
F11	17	350184	481460
F12	17	338700	507280
G1	17	372606	582450
G2	17	357810	537700
G3	17	436350	625066
G4	17	410281	633145
G5	17	479532	732564
G6	17	503402	741371
G7	17	343709	472417
G8	17	398872	522629
G9	17	451730	579881
G10	17	367684	498468
G11	17	342303	471110
G12	17	396033	569913
H1	17	441496	632697
H2	17	344402	541741
H3	17	446574	596107
H4	17
H5	17
H6	17
H7	17	336875	475416
H8	17	407913	555958
H9	17	406051	566058
H10	17
H11	17
H12	17
A1	18	293950	418776
A2	18	273727	401625
A3	18	272055	411181
A4	18	255598	369066
A5	18	324506	425787
A6	18	335392	425149
A7	18	232439	324572
A8	18	308295	406724
A9	18	332841	420342
A10	18	311665	409091
A11	18	340447	442754
A12	18	372019	473476
B1	18	264785	388949
B2	18	258077	395275
B3	18	276870	418148
B4	18	238095	377690
B5	18	311479	429253
B6	18	326697	459486
B7	18	216347	300462
B8	18	297427	383726
B9	18	297399	397703
B10	18	256167	370250
B11	18	312908	412381
B12	18	301883	426261
C1	18	338440	459753
C2	18	263261	396656
C3	18	286092	407056
C4	18	208513	357518
C5	18	319858	468387
C6	18	323715	455828
C7	18	242300	358611
C8	18	311508	416165
C9	18	342686	440968
C10	18	246392	377269
C11	18	317634	422267
C12	18	309647	443224
D1	18	367281	497302
D2	18	275962	396422
D3	18	338834	445512
D4	18	285695	446683
D5	18	375211	518392
D6	18	353296	492082
D7	18	288540	408557
D8	18	309057	407122
D9	18	313794	419725
D10	18	299744	416444
D11	18	304141	427103
D12	18	339037	487175
E1	18	383258	574761
E2	18	319050	495877
E3	18	365532	545632
E4	18	329697	487841
E5	18	405155	561209
E6	18	393334	550089
E7	18	296967	430617
E8	18	403689	515489
E9	18	367534	478846
E10	18	304154	433709
E11	18	324943	445414
E12	18	357387	505135
F1	18	391343	572896
F2	18	313366	481817
F3	18	413431	577745
F4	18	343222	499314
F5	18	476792	665650
F6	18	394778	556334
F7	18	329229	481573
F8	18	385986	511873
F9	18	439762	564838
F10	18	356185	496136
F11	18	350648	481468
F12	18	338828	506387
G1	18	372369	582479
G2	18	356737	536973
G3	18	437811	625344
G4	18	410958	632935
G5	18	480380	731046
G6	18	504113	740801
G7	18	343520	472094
G8	18	398869	522795
G9	18	450921	580238
G10	18	368123	498142
G11	18	342067	471466
G12	18	397333	569635
H1	18	442626	631479
H2	18	344602	541700
H3	18	445928	596076
H4	18
H5	18
H6	18
H7	18	336832	474580
H8	18	407490	555519
H9	18	405728	566270
H10	18
H11	18
H12	18
A1	19	292966	418368
A2	19	274614	401120
A3	19	272470	411146
A4	19	255833	369328
A5	19	324533	426232
A6	19	335843	424796
A7	19	232190	324589
A8	19	308099	406766
A9	19	332782	419751
A10	19	311940	409253
A11	19	340979	442431
A12	19	372398	472614
B1	19	265267	389014
B2	19	257813	395193
B3	19	277487	417656
B4	19	238422	377867
B5	19	311299	428886
B6	19	326546	459369
B7	19	216478	300509
B8	19	297032	383475
B9	19	297266	397426
B10	19	256069	370528
B11	19	312417	412637
B12	19	301162	426375
C1	19	339311	459847
C2	19	263340	396978
C3	19	286790	407271
C4	19	208589	357030
C5	19	319656	468767
C6	19	323872	455723
C7	19	241873	358739
C8	19	311078	416312
C9	19	342552	440398
C10	19	245289	377019
C11	19	317634	422544
C12	19	309759	443007
D1	19	366632	497008
D2	19	275514	396179
D3	19	339442	445603
D4	19	285909	446327
D5	19	375408	518176
D6	19	353255	492130
D7	19	287757	408948
D8	19	308730	407162
D9	19	313859	419124
D10	19	300229	416811
D11	19	303989	426538
D12	19	339491	487639
E1	19	383996	574545
E2	19	318857	495619
E3	19	365831	545588
E4	19	330659	487841
E5	19	405637	561411
E6	19	393995	550366
E7	19	297183	430367
E8	19	403752	515322
E9	19	367943	479308
E10	19	303086	433607
E11	19	325083	445028
E12	19	356988	504539
F1	19	391485	572583
F2	19	313711	481791
F3	19	412700	577657
F4	19	343768	499587
F5	19	477187	666789
F6	19	394545	558517
F7	19	329350	481458
F8	19	385597	511637
F9	19	439413	564556
F10	19	355472	496078
F11	19	350591	480754
F12	19	338437	506708
G1	19	372157	582006
G2	19	357545	536743
G3	19	437972	623953
G4	19	410866	634423
G5	19	481448	730018
G6	19	505050	741219
G7	19	343042	472388
G8	19	398338	522310
G9	19	451481	579935
G10	19	368175	498421
G11	19	343599	471512
G12	19	397521	569066
H1	19	441175	631070
H2	19	344556	541037
H3	19	446341	596119
H4	19
H5	19
H6	19
H7	19	336943	474934
H8	19	407868	555251
H9	19	405440	565808
H10	19
H11	19
H12	19
A1	20	293731	418289
A2	20	274596	401518
A3	20	272074	411370
A4	20	255490	368809
A5	20	324456	425475
A6	20	335723	425049
A7	20	232447	324927
A8	20	308044	406744
A9	20	332678	420366
A10	20	311743	408910
A11	20	340876	442039
A12	20	371797	472169
B1	20	265358	389303
B2	20	258260	395106
B3	20	277942	418245
B4	20	238356	377963
B5	20	311526	428455
B6	20	326671	459489
B7	20	216583	300458
B8	20	297026	383701
B9	20	297590	396969
B10	20	255913	370403
B11	20	312723	412116
B12	20	301666	426025
C1	20	339176	459655
C2	20	263464	396636
C3	20	287028	406748
C4	20	208114	357633
C5	20	319631	468601
C6	20	324137	455465
C7	20	242166	358362
C8	20	311117	415757
C9	20	342776	440476
C10	20	245169	377137
C11	20	317532	422389
C12	20	309950	442875
D1	20	366898	496544
D2	20	276124	396158
D3	20	339413	445792
D4	20	286529	446488
D5	20	376009	518438
D6	20	353397	491944
D7	20	288037	408841
D8	20	308468	407341
D9	20	313942	419271
D10	20	299865	416211
D11	20	304159	426844
D12	20	339465	487369
E1	20	383929	574405
E2	20	319132	495897
E3	20	366191	546557
E4	20	330195	487782
E5	20	405206	561425
E6	20	393874	550149
E7	20	296770	430492
E8	20	404118	514911
E9	20	367315	478694
E10	20	303189	432952
E11	20	324735	445021
E12	20	356406	504567
F1	20	392190	572971
F2	20	313998	481333
F3	20	413574	577846
F4	20	344448	499012
F5	20	477649	666861
F6	20	394957	558089
F7	20	329715	481093
F8	20	385599	510907
F9	20	439812	564926
F10	20	355447	495931
F11	20	350928	481024
F12	20	338028	507837
G1	20	372553	582248
G2	20	356659	537002
G3	20	438962	624472
G4	20	412636	634496
G5	20	481794	729980
G6	20	505650	740089
G7	20	343158	472454
G8	20	398441	522075
G9	20	450222	579289
G10	20	369035	497925
G11	20	343779	470693
G12	20	397699	569226
H1	20	440344	630554
H2	20	344310	540986
H3	20	446942	596290
H4	20
H5	20
H6	20
H7	20	336297	474535
H8	20	408098	554927
H9	20	405263	565337
H10	20
H11	20
H12	20
A1	21	294395	417339
A2	21	274867	401425
A3	21	272995	411469
A4	21	256236	368827
A5	21	324466	425597
A6	21	336011	425018
A7	21	232449	324579
A8	21	308056	406318
A9	21	332734	420156
A10	21	311918	408978
A11	21	341460	442826
A12	21	372617	471763
B1	21	265902	388299
B2	21	258582	395689
B3	21	277408	417451
B4	21	238311	377907
B5	21	311631	429198
B6	21	326442	460083
B7	21	216008	300547
B8	21	296321	383816
B9	21	297517	397288
B10	21	255988	370912
B11	21	312379	411790
B12	21	301144	425737
C1	21	339500	459282
C2	21	263488	395954
C3	21	286539	407332
C4	21	208879	357664
C5	21	319981	468642
C6	21	324455	455621
C7	21	242336	358115
C8	21	311750	416148
C9	21	343266	440635
C10	21	245250	377672
C11	21	317962	422773
C12	21	310018	442959
D1	21	366764	497328
D2	21	275807	395835
D3	21	339634	444764
D4	21	286786	446742
D5	21	375464	518794
D6	21	353766	492053
D7	21	288217	408469
D8	21	308987	407697
D9	21	313816	419352
D10	21	300458	416946
D11	21	304621	427655
D12	21	339433	486986
E1	21	383968	575321
E2	21	318712	495374
E3	21	366695	546453
E4	21	330990	487920
E5	21	405832	561206
E6	21	394762	549927
E7	21	296578	430284
E8	21	404225	514944
E9	21	367683	478568
E10	21	302769	433418
E11	21	324439	444579
E12	21	356597	504282
F1	21	391338	572371
F2	21	314132	481781
F3	21	413176	577413
F4	21	344265	498730
F5	21	477286	665967
F6	21	395134	557335
F7	21	329648	481432
F8	21	385776	511133
F9	21	440503	564353
F10	21	355013	496318
F11	21	351167	480895
F12	21	338053	506982
G1	21	372679	581895
[truncated: 10,967 more rows]

## Sheet: Amplification Data
Block Type	96alum
Chemistry	SYBR_GREEN
Experiment File Name	D:\HAIFENG\89Untitled.eds
Experiment Run End Time	2021-08-29 16:18:57 PM CST
Instrument Type	sds7500
Passive Reference	ROX
Well	Cycle	Target Name	Rn	ΔRn
A1	1	CBF8	0.66248	-0.0133062
A1	2	CBF8	0.663764	-0.0132212
A1	3	CBF8	0.667316	-0.0108678
A1	4	CBF8	0.67112	-0.00826268
A1	5	CBF8	0.674283	-0.00629767
A1	6	CBF8	0.677861	-0.00391908
A1	7	CBF8	0.68184	-0.00113856
A1	8	CBF8	0.682161	-0.00201611
A1	9	CBF8	0.685717	0.000340559
A1	10	CBF8	0.686709	0.000134462
A1	11	CBF8	0.690687	0.00291366
A1	12	CBF8	0.691386	0.0024133
A1	13	CBF8	0.693576	0.0034049
A1	14	CBF8	0.693009	0.0016396
A1	15	CBF8	0.697242	0.00467302
A1	16	CBF8	0.696169	0.00240114
A1	17	CBF8	0.698306	0.00333963
A1	18	CBF8	0.701928	0.00576347
A1	19	CBF8	0.700258	0.0028946
A1	20	CBF8	0.702221	0.00365833
A1	21	CBF8	0.70541	0.00564854
A1	22	CBF8	0.706369	0.00540865
A1	23	CBF8	0.705872	0.00371357
A1	24	CBF8	0.706272	0.00291494
A1	25	CBF8	0.707113	0.00255709
A1	26	CBF8	0.708643	0.00288792
A1	27	CBF8	0.709833	0.00287911
A1	28	CBF8	0.708499	0.000346941
A1	29	CBF8	0.711318	0.00196665
A1	30	CBF8	0.710829	0.000279143
A1	31	CBF8	0.709759	-0.00198963
A1	32	CBF8	0.710507	-0.0024407
A1	33	CBF8	0.712345	-0.00180095
A1	34	CBF8	0.713456	-0.00188849
A1	35	CBF8	0.714135	-0.00240883
A1	36	CBF8	0.714084	-0.00365866
A1	37	CBF8	0.715012	-0.00392949
A1	38	CBF8	0.71437	-0.00577024
A1	39	CBF8	0.715548	-0.00579037
A1	40	CBF8	0.71465	-0.00788737
A2	1	CBF8	0.646639	-0.0148081
A2	2	CBF8	0.652753	-0.00975229
A2	3	CBF8	0.655428	-0.00813685
A2	4	CBF8	0.658927	-0.00569642
A2	5	CBF8	0.660965	-0.0047169
A2	6	CBF8	0.663722	-0.00301897
A2	7	CBF8	0.667059	-0.000741143
A2	8	CBF8	0.667259	-0.00159923
A2	9	CBF8	0.669918	1.13189e-07
A2	10	CBF8	0.672365	0.00138852
A2	11	CBF8	0.674777	0.00274164
A2	12	CBF8	0.676256	0.00316189
A2	13	CBF8	0.675759	0.00160577
A2	14	CBF8	0.676413	0.00120121
A2	15	CBF8	0.679365	0.00309447
A2	16	CBF8	0.679776	0.0024466
A2	17	CBF8	0.680941	0.00255273
A2	18	CBF8	0.681548	0.00210073
A2	19	CBF8	0.684619	0.00411337
A2	20	CBF8	0.683895	0.0023304
A2	21	CBF8	0.684726	0.00210292
A2	22	CBF8	0.687602	0.00391971
A2	23	CBF8	0.685518	0.000776432
A2	24	CBF8	0.688328	0.00252807
A2	25	CBF8	0.690428	0.0035691
A2	26	CBF8	0.688047	0.000129055
A2	27	CBF8	0.689481	0.000504422
A2	28	CBF8	0.691876	0.00184067
A2	29	CBF8	0.691773	0.00067854
A2	30	CBF8	0.693774	0.0016211
A2	31	CBF8	0.692751	-0.000460552
A2	32	CBF8	0.691705	-0.00256539
A2	33	CBF8	0.694528	-0.000801538
A2	34	CBF8	0.69518	-0.00120818
A2	35	CBF8	0.694593	-0.00285449
A2	36	CBF8	0.696669	-0.00183754
A2	37	CBF8	0.69564	-0.00392498
A2	38	CBF8	0.697792	-0.00283155
A2	39	CBF8	0.697669	-0.00401371
A2	40	CBF8	0.697709	-0.00503226
A3	1	CBF8	0.64344	-0.00627277
A3	2	CBF8	0.643676	-0.00657133
A3	3	CBF8	0.645466	-0.0053163
A3	4	CBF8	0.647006	-0.00431101
A3	5	CBF8	0.648486	-0.0033655
A3	6	CBF8	0.649809	-0.00257705
A3	7	CBF8	0.650892	-0.00202911
A3	8	CBF8	0.652799	-0.000656711
A3	9	CBF8	0.654392	0.000401509
A3	10	CBF8	0.655094	0.0005684
A3	11	CBF8	0.65486	-0.000200441
A3	12	CBF8	0.656063	0.000467905
A3	13	CBF8	0.658486	0.00235588
A3	14	CBF8	0.658867	0.00220258
A3	15	CBF8	0.660584	0.00338483
A3	16	CBF8	0.657948	0.000213567
A3	17	CBF8	0.661023	0.00275439
A3	18	CBF8	0.661643	0.00283968
A3	19	CBF8	0.662709	0.00337094
A3	20	CBF8	0.661384	0.0015108
A3	21	CBF8	0.663463	0.00305462
A3	22	CBF8	0.663663	0.00272059
A3	23	CBF8	0.662805	0.00132715
A3	24	CBF8	0.665132	0.00311922
A3	25	CBF8	0.663159	0.000611535
A3	26	CBF8	0.663772	0.000690153
A3	27	CBF8	0.664676	0.00105934
A3	28	CBF8	0.664642	0.000490177
A3	29	CBF8	0.666434	0.00174771
A3	30	CBF8	0.665598	0.000377164
A3	31	CBF8	0.665227	-0.000529126
A3	32	CBF8	0.664924	-0.00136645
A3	33	CBF8	0.665172	-0.00165381
A3	34	CBF8	0.666861	-0.00049903
A3	35	CBF8	0.664116	-0.00377854
A3	36	CBF8	0.666395	-0.00203433
A3	37	CBF8	0.667738	-0.00122663
A3	38	CBF8	0.666283	-0.00321659
A3	39	CBF8	0.667526	-0.00250753
A3	40	CBF8	0.666817	-0.00375178
A4	1	CBF8	0.6748	-0.00705634
A4	2	CBF8	0.676282	-0.00605156
A4	3	CBF8	0.678332	-0.00447875
A4	4	CBF8	0.678686	-0.00460217
A4	5	CBF8	0.680036	-0.00372978
A4	6	CBF8	0.682296	-0.00194686
A4	7	CBF8	0.684474	-0.000246858
A4	8	CBF8	0.683972	-0.00122555
A4	9	CBF8	0.684377	-0.0012983
A4	10	CBF8	0.685638	-0.000514539
A4	11	CBF8	0.687816	0.00118576
A4	12	CBF8	0.68889	0.00178261
A4	13	CBF8	0.690049	0.00246379
A4	14	CBF8	0.690465	0.00240242
A4	15	CBF8	0.689811	0.00127144
A4	16	CBF8	0.690675	0.00165746
A4	17	CBF8	0.690228	0.000733253
A4	18	CBF8	0.692554	0.00258173
A4	19	CBF8	0.692698	0.0022485
A4	20	CBF8	0.692744	0.00181687
A4	21	CBF8	0.694733	0.00332852
A4	22	CBF8	0.693665	0.00178282
A4	23	CBF8	0.692866	0.000506464
A4	24	CBF8	0.695382	0.00254556
A4	25	CBF8	0.695959	0.002645
A4	26	CBF8	0.695646	0.00185472
A4	27	CBF8	0.696021	0.00175175
A4	28	CBF8	0.695024	0.000277389
A4	29	CBF8	0.696199	0.000975738
A4	30	CBF8	0.695305	-0.000396578
A4	31	CBF8	0.695018	-0.00116093
A4	32	CBF8	0.696423	-0.00023316
A4	33	CBF8	0.697185	5.15333e-05
A4	34	CBF8	0.697368	-0.000242297
A4	35	CBF8	0.695376	-0.00271229
A4	36	CBF8	0.696478	-0.00208744
A4	37	CBF8	0.695218	-0.00382453
A4	38	CBF8	0.697399	-0.00212107
A4	39	CBF8	0.696956	-0.00304224
A4	40	CBF8	0.696088	-0.00438672
A5	1	CBF8	0.738584	-0.0134819
A5	2	CBF8	0.743605	-0.00884902
A5	3	CBF8	0.744427	-0.00841562
A5	4	CBF8	0.747575	-0.00565596
A5	5	CBF8	0.750851	-0.00276804
A5	6	CBF8	0.751395	-0.00261335
A5	7	CBF8	0.753396	-0.00100013
A5	8	CBF8	0.753994	-0.000790597
A5	9	CBF8	0.756485	0.00131126
A5	10	CBF8	0.756159	0.000597634
A5	11	CBF8	0.756983	0.00103259
A5	12	CBF8	0.758905	0.00256606
A5	13	CBF8	0.758045	0.00131772
A5	14	CBF8	0.758308	0.00119251
A5	15	CBF8	0.760646	0.0031416
A5	16	CBF8	0.75966	0.00176713
A5	17	CBF8	0.760784	0.00250244
A5	18	CBF8	0.762133	0.00346358
A5	19	CBF8	0.7614	0.00234142
A5	20	CBF8	0.762574	0.00312769
A5	21	CBF8	0.76238	0.00254442
A5	22	CBF8	0.762199	0.00197515
A5	23	CBF8	0.762499	0.00188696
A5	24	CBF8	0.762748	0.00174768
A5	25	CBF8	0.76372	0.00233135
A5	26	CBF8	0.763436	0.00165843
A5	27	CBF8	0.763643	0.00147666
A5	28	CBF8	0.762985	0.000430676
A5	29	CBF8	0.762936	-7.45866e-06
A5	30	CBF8	0.763267	-6.48384e-05
A5	31	CBF8	0.763548	-0.00017163
A5	32	CBF8	0.763068	-0.00104029
A5	33	CBF8	0.763986	-0.00051098
A5	34	CBF8	0.76265	-0.00223556
A5	35	CBF8	0.763807	-0.00146718
A5	36	CBF8	0.763446	-0.00221609
A5	37	CBF8	0.763868	-0.00218293
A5	38	CBF8	0.763202	-0.0032369
A5	39	CBF8	0.762792	-0.0040354
A5	40	CBF8	0.761053	-0.00616357
A6	1	CBF8	0.775877	-0.00678845
A6	2	CBF8	0.775825	-0.00709379
A6	3	CBF8	0.777003	-0.00616901
A6	4	CBF8	0.779578	-0.00384739
A6	5	CBF8	0.779911	-0.00376822
A6	6	CBF8	0.781277	-0.0026555
A6	7	CBF8	0.782934	-0.0012518
A6	8	CBF8	0.783501	-0.000937903
A6	9	CBF8	0.784385	-0.000307507
A6	10	CBF8	0.785497	0.000551531
A6	11	CBF8	0.785057	-0.000142429
A6	12	CBF8	0.786446	0.000993474
A6	13	CBF8	0.788205	0.00249904
A6	14	CBF8	0.788539	0.00258006
A6	15	CBF8	0.787903	0.00169012
A6	16	CBF8	0.788517	0.00205122
A6	17	CBF8	0.788865	0.0021453
A6	18	CBF8	0.78888	0.00190767
A6	19	CBF8	0.790599	0.00337277
A6	20	CBF8	0.789847	0.00236726
A6	21	CBF8	0.79058	0.00284763
A6	22	CBF8	0.790753	0.0027667
A6	23	CBF8	0.789388	0.00114845
A6	24	CBF8	0.790645	0.00215227
A6	25	CBF8	0.790777	0.00203093
A6	26	CBF8	0.79032	0.0013204
A6	27	CBF8	0.791792	0.00253868
A6	28	CBF8	0.789392	-0.000114488
A6	29	CBF8	0.791505	0.0017449
A6	30	CBF8	0.789685	-0.00032784
A6	31	CBF8	0.790187	-7.90928e-05
A6	32	CBF8	0.789849	-0.000670414
A6	33	CBF8	0.790176	-0.000597203
A6	34	CBF8	0.789368	-0.0016588
A6	35	CBF8	0.7888	-0.00248014
A6	36	CBF8	0.788609	-0.00292424
A6	37	CBF8	0.789888	-0.0018989
A6	38	CBF8	0.788595	-0.00344497
A6	39	CBF8	0.788861	-0.00343256
A6	40	CBF8	0.7871	-0.00544694
A7	1	CBF9	0.71119	-0.000511734
A7	2	CBF9	0.71085	-0.000956644
A7	3	CBF9	0.70803	-0.00388248
A7	4	CBF9	0.708274	-0.00374374
A7	5	CBF9	0.708325	-0.0037983
A7	6	CBF9	0.70993	-0.00229884
A7	7	CBF9	0.709914	-0.0024204
A7	8	CBF9	0.712031	-0.00040852
A7	9	CBF9	0.712117	-0.000427911
A7	10	CBF9	0.71379	0.00113973
A7	11	CBF9	0.713683	0.000927518
A7	12	CBF9	0.715066	0.0022053
A7	13	CBF9	0.715032	0.00206593
A7	14	CBF9	0.714966	0.00189377
A7	15	CBF9	0.713539	0.000361849
A7	16	CBF9	0.714373	0.00108996
A7	17	CBF9	0.715694	0.00230617
A7	18	CBF9	0.71614	0.00264679
A7	19	CBF9	0.715336	0.00173679
A7	20	CBF9	0.715381	0.0016771
A7	21	CBF9	0.716155	0.00234579
A7	22	CBF9	0.714546	0.000631361
A7	23	CBF9	0.716108	0.00208718
A7	24	CBF9	0.714884	0.000758338
A7	25	CBF9	0.716376	0.00214448
A7	26	CBF9	0.716357	0.00202084
A7	27	CBF9	0.716376	0.0019338
A7	28	CBF9	0.714822	0.000274805
A7	29	CBF9	0.714803	0.000149854
A7	30	CBF9	0.715271	0.000513243
A7	31	CBF9	0.71553	0.000666646
A7	32	CBF9	0.714588	-0.000381045
A7	33	CBF9	0.714651	-0.000423623
A7	34	CBF9	0.712789	-0.00239048
A7	35	CBF9	0.713273	-0.00201237
A7	36	CBF9	0.713574	-0.00181629
A7	37	CBF9	0.712101	-0.00339529
A7	38	CBF9	0.713812	-0.00178903
A7	39	CBF9	0.713318	-0.00238897
A7	40	CBF9	0.711158	-0.00465468
A8	1	CBF9	0.754794	-0.00210314
A8	2	CBF9	0.754792	-0.00202741
A8	3	CBF9	0.75271	-0.00403177
A8	4	CBF9	0.752528	-0.00413594
A8	5	CBF9	0.752881	-0.0037058
A8	6	CBF9	0.753723	-0.00278668
A8	7	CBF9	0.754676	-0.00175543
A8	8	CBF9	0.755557	-0.000797498
A8	9	CBF9	0.755476	-0.000800572
A8	10	CBF9	0.756323	0.000123981
A8	11	CBF9	0.757844	0.0017226
A8	12	CBF9	0.756334	0.000289911
A8	13	CBF9	0.758231	0.00226434
A8	14	CBF9	0.758072	0.00218283
A8	15	CBF9	0.757704	0.00189317
A8	16	CBF9	0.75796	0.00222639
A8	17	CBF9	0.758138	0.00248194
A8	18	CBF9	0.757995	0.00241634
A8	19	CBF9	0.757435	0.00193369
A8	20	CBF9	0.75734	0.00191661
A8	21	CBF9	0.758164	0.00281815
A8	22	CBF9	0.758282	0.00301386
A8	23	CBF9	0.75689	0.00169972
A8	24	CBF9	0.756714	0.0016011
A8	25	CBF9	0.756765	0.00172939
A8	26	CBF9	0.754573	-0.000384995
A8	27	CBF9	0.755094	0.000213998
A8	28	CBF9	0.756218	0.001415
A8	29	CBF9	0.754793	6.75401e-05
A8	30	CBF9	0.755392	0.000744555
A8	31	CBF9	0.755369	0.00079888
A8	32	CBF9	0.753507	-0.000985598
A8	33	CBF9	0.753636	-0.000778566
A8	34	CBF9	0.752325	-0.00201206
A8	35	CBF9	0.752107	-0.00215294
A8	36	CBF9	0.75248	-0.001702
A8	37	CBF9	0.751944	-0.00216058
A8	38	CBF9	0.752011	-0.00201643
A8	39	CBF9	0.750602	-0.00334714
A8	40	CBF9	0.749712	-0.00416018
A9	1	CBF9	0.785403	-0.000826142
A9	2	CBF9	0.783789	-0.00262877
A9	3	CBF9	0.783184	-0.00342241
A9	4	CBF9	0.783809	-0.00298539
A9	5	CBF9	0.784672	-0.00231055
A9	6	CBF9	0.782726	-0.0044456
A9	7	CBF9	0.784949	-0.00241034
A9	8	CBF9	0.78651	-0.00103795
A9	9	CBF9	0.785047	-0.00268984
A9	10	CBF9	0.787677	-0.000248555
A9	11	CBF9	0.787304	-0.000809499
A9	12	CBF9	0.7902	0.00189822
A9	13	CBF9	0.791555	0.00306432
A9	14	CBF9	0.791193	0.00251404
A9	15	CBF9	0.791335	0.0024682
A9	16	CBF9	0.791584	0.00252875
A9	17	CBF9	0.792748	0.00350382
A9	18	CBF9	0.791833	0.00240024
A9	19	CBF9	0.792808	0.00318684
A9	20	CBF9	0.791401	0.00159175
A9	21	CBF9	0.791928	0.00193072
A9	22	CBF9	0.792236	0.00204992
A9	23	CBF9	0.794118	0.00374376
A9	24	CBF9	0.791569	0.001006
A9	25	CBF9	0.791682	0.000930892
A9	26	CBF9	0.789874	-0.00106605
A9	27	CBF9	0.791768	0.00064031
A9	28	CBF9	0.79289	0.00157365
A9	29	CBF9	0.792426	0.00092086
A9	30	CBF9	0.791515	-0.000178374
A9	31	CBF9	0.792161	0.000279325
A9	32	CBF9	0.791672	-0.000398682
A9	33	CBF9	0.791452	-0.000806323
A9	34	CBF9	0.790163	-0.00228381
A9	35	CBF9	0.789908	-0.00272721
A9	36	CBF9	0.792727	-9.72203e-05
A9	37	CBF9	0.789644	-0.00336863
A9	38	CBF9	0.791782	-0.0014186
A9	39	CBF9	0.789863	-0.00352659
A9	40	CBF9	0.78945	-0.00412782
A10	1	CBF9	0.740528	0.000576894
A10	2	CBF9	0.737445	-0.00347613
A10	3	CBF9	0.737258	-0.00463206
A10	4	CBF9	0.734586	-0.00827274
A10	5	CBF9	0.738177	-0.00565051
A10	6	CBF9	0.739278	-0.00551917
A10	7	CBF9	0.741008	-0.0047581
A10	8	CBF9	0.743412	-0.0033229
A10	9	CBF9	0.745068	-0.00263652
A10	10	CBF9	0.749061	0.000388093
A10	11	CBF9	0.750828	0.00118546
A10	12	CBF9	0.751653	0.00104161
A10	13	CBF9	0.756401	0.00482016
A10	14	CBF9	0.757028	0.00447873
A10	15	CBF9	0.756758	0.00323946
A10	16	CBF9	0.758671	0.00418352
A10	17	CBF9	0.758879	0.00342204
A10	18	CBF9	0.761847	0.00542068
A10	19	CBF9	0.762217	0.00482193
A10	20	CBF9	0.762377	0.00401254
A10	21	CBF9	0.762676	0.0033425
A10	22	CBF9	0.765678	0.00537577
A10	23	CBF9	0.764492	0.00322109
A10	24	CBF9	0.765846	0.003606
A10	25	CBF9	0.765594	0.00238414
A10	26	CBF9	0.76698	0.00280123
A10	27	CBF9	0.768091	0.00294354
A10	28	CBF9	0.767336	0.00121945
A10	29	CBF9	0.768672	0.001586
A10	30	CBF9	0.768725	0.000669911
A10	31	CBF9	0.767764	-0.00125963
A10	32	CBF9	0.769862	-0.000130865
A10	33	CBF9	0.768757	-0.00220507
A10	34	CBF9	0.768912	-0.00301917
A10	35	CBF9	0.770711	-0.00218867
A10	36	CBF9	0.768693	-0.00517619
A10	37	CBF9	0.76974	-0.00509855
A10	38	CBF9	0.771295	-0.0045126
A10	39	CBF9	0.770995	-0.00578107
A10	40	CBF9	0.770627	-0.00711886
A11	1	CBF9	0.742939	-0.00566947
A11	2	CBF9	0.743074	-0.00645661
A11	3	CBF9	0.741929	-0.0085237
A11	4	CBF9	0.741611	-0.00976408
A11	5	CBF9	0.745812	-0.00648571
A11	6	CBF9	0.746646	-0.00657386
A11	7	CBF9	0.751283	-0.00285948
A11	8	CBF9	0.751751	-0.00331391
A11	9	CBF9	0.754707	-0.00128008
A11	10	CBF9	0.758629	0.00172018
A11	11	CBF9	0.758217	0.000385328
A11	12	CBF9	0.761593	0.00283973
A11	13	CBF9	0.764796	0.00512068
A11	14	CBF9	0.764394	0.0037959
A11	15	CBF9	0.765851	0.00433043
A11	16	CBF9	0.768734	0.00629154
A11	17	CBF9	0.767355	0.00398991
A11	18	CBF9	0.76893	0.0046424
A11	19	CBF9	0.770696	0.0054861
A11	20	CBF9	0.771144	0.00501236
A11	21	CBF9	0.771093	0.00403925
A11	22	CBF9	0.772093	0.00411656
A11	23	CBF9	0.771215	0.00231674
A11	24	CBF9	0.773436	0.0036151
A11	25	CBF9	0.773286	0.00254335
A11	26	CBF9	0.774127	0.00246193
A11	27	CBF9	0.77664	0.0040523
A11	28	CBF9	0.774991	0.00148125
A11	29	CBF9	0.775251	0.000818979
A11	30	CBF9	0.775829	0.000474403
A11	31	CBF9	0.778348	0.00207109
A11	32	CBF9	0.776418	-0.000780994
A11	33	CBF9	0.776196	-0.00192558
A11	34	CBF9	0.776203	-0.00284081
A11	35	CBF9	0.774678	-0.00528777
A11	36	CBF9	0.776168	-0.00471985
A11	37	CBF9	0.777344	-0.00446612
A11	38	CBF9	0.777098	-0.00563479
A11	39	CBF9	0.776506	-0.00714875
A11	40	CBF9	0.775669	-0.00890816
A12	1	CBF9	0.767494	0.00156924
A12	2	CBF9	0.759602	-0.00724867
A12	3	CBF9	0.759437	-0.0083405
A12	4	CBF9	0.760856	-0.00784715
A12	5	CBF9	0.761719	-0.00791039
A12	6	CBF9	0.763817	-0.00673897
A12	7	CBF9	0.76797	-0.00351179
A12	8	CBF9	0.768442	-0.00396615
A12	9	CBF9	0.77135	-0.00198453
A12	10	CBF9	0.77537	0.00110919
A12	11	CBF9	0.776643	0.00145598
A12	12	CBF9	0.779884	0.00377049
A12	13	CBF9	0.782609	0.0055693
A12	14	CBF9	0.782571	0.0046055
A12	15	CBF9	0.784094	0.00520185
A12	16	CBF9	0.783978	0.00415931
A12	17	CBF9	0.78597	0.00522546
A12	18	CBF9	0.785719	0.00404822
A12	19	CBF9	0.787955	0.00535833
A12	20	CBF9	0.787424	0.00390035
A12	21	CBF9	0.78984	0.00538993
A12	22	CBF9	0.789968	0.00459249
A12	23	CBF9	0.790835	0.00453301
A12	24	CBF9	0.791285	0.00405641
A12	25	CBF9	0.78924	0.00108513
A12	26	CBF9	0.791435	0.00235376
A12	27	CBF9	0.79231	0.00230238
A12	28	CBF9	0.792987	0.00205318
A12	29	CBF9	0.791301	-0.000558749
A12	30	CBF9	0.793196	0.000410428
A12	31	CBF9	0.793438	-0.000274007
A12	32	CBF9	0.793724	-0.000914573
A12	33	CBF9	0.792913	-0.00265198
A12	34	CBF9	0.794176	-0.00231486
A12	35	CBF9	0.793735	-0.00368206
A12	36	CBF9	0.793457	-0.00488643
A12	37	CBF9	0.795241	-0.00402901
A12	38	CBF9	0.795826	-0.00436976
A12	39	CBF9	0.793922	-0.00719979
A12	40	CBF9	0.793567	-0.00848134
B1	1	CBF8	0.661989	-0.0077738
B1	2	CBF8	0.662076	-0.00821728
B1	3	CBF8	0.665056	-0.00576821
B1	4	CBF8	0.664021	-0.00733464
B1	5	CBF8	0.669371	-0.00251515
B1	6	CBF8	0.669799	-0.00261721
B1	7	CBF8	0.671903	-0.00104409
B1	8	CBF8	0.671773	-0.00170513
B1	9	CBF8	0.671246	-0.00276271
B1	10	CBF8	0.675628	0.00108886
B1	11	CBF8	0.67652	0.00144933
B1	12	CBF8	0.678399	0.00279744
B1	13	CBF8	0.678375	0.00224316
B1	14	CBF8	0.679401	0.00273797
B1	15	CBF8	0.680124	0.00293018
B1	16	CBF8	0.680817	0.00309246
B1	17	CBF8	0.681534	0.00327906
B1	18	CBF8	0.680771	0.00198526
B1	19	CBF8	0.681895	0.00257896
B1	20	CBF8	0.681624	0.00177678
B1	21	CBF8	0.684787	0.00440968
B1	22	CBF8	0.682213	0.00130497
B1	23	CBF8	0.683978	0.00253906
B1	24	CBF8	0.684461	0.00249088
B1	25	CBF8	0.682581	7.97898e-05
B1	26	CBF8	0.6853	0.00226809
B1	27	CBF8	0.684959	0.00139701
B1	28	CBF8	0.684826	0.000732635
B1	29	CBF8	0.683661	-0.000962602
B1	30	CBF8	0.685441	0.000286571
B1	31	CBF8	0.685402	-0.000282794
B1	32	CBF8	0.686645	0.000428745
B1	33	CBF8	0.685549	-0.00119741
B1	34	CBF8	0.685057	-0.00222013
B1	35	CBF8	0.68608	-0.00172787
B1	36	CBF8	0.686793	-0.00154604
B1	37	CBF8	0.686325	-0.0025451
B1	38	CBF8	0.685984	-0.00341624
B1	39	CBF8	0.68568	-0.00425156
B1	40	CBF8	0.684853	-0.0056092
B2	1	CBF8	0.626593	-0.00880432
B2	2	CBF8	0.628693	-0.00750418
B2	3	CBF8	0.628676	-0.00831995
B2	4	CBF8	0.630463	-0.00733154
B2	5	CBF8	0.636285	-0.00230938
B2	6	CBF8	0.636746	-0.00264676
B2	7	CBF8	0.638364	-0.00182798
B2	8	CBF8	0.639716	-0.00127588
B2	9	CBF8	0.642751	0.000960473
B2	10	CBF8	0.64454	0.0019499
B2	11	CBF8	0.645045	0.00165621
B2	12	CBF8	0.647056	0.00286748
B2	13	CBF8	0.646886	0.00189865
B2	14	CBF8	0.647138	0.00135188
B2	15	CBF8	0.649548	0.00296286
B2	16	CBF8	0.650019	0.00263479
B2	17	CBF8	0.651147	0.00296325
B2	18	CBF8	0.652905	0.00392222
B2	19	CBF8	0.652372	0.00259028
B2	20	CBF8	0.653648	0.00306698
B2	21	CBF8	0.653498	0.00211776
B2	22	CBF8	0.655124	0.00294435
B2	23	CBF8	0.653735	0.000756187
B2	24	CBF8	0.654992	0.00121465
B2	25	CBF8	0.65527	0.000692799
B2	26	CBF8	0.656349	0.000973343
B2	27	CBF8	0.658232	0.00205724
B2	28	CBF8	0.657206	0.000231654
B2	29	CBF8	0.658834	0.00106068
B2	30	CBF8	0.658528	-4.41648e-05
B2	31	CBF8	0.659009	-0.000362527
B2	32	CBF8	0.660062	-0.000108507
B2	33	CBF8	0.659076	-0.00189398
B2	34	CBF8	0.660084	-0.0016849
B2	35	CBF8	0.662284	-0.000284323
B2	36	CBF8	0.661583	-0.00178423
B2	37	CBF8	0.660619	-0.00354771
B2	38	CBF8	0.662077	-0.00288885
B2	39	CBF8	0.661202	-0.00456298
B2	40	CBF8	0.662578	-0.00398626
B3	1	CBF8	0.640957	-0.00649354
B3	2	CBF8	0.643042	-0.00514807
B3	3	CBF8	0.643888	-0.00504249
B3	4	CBF8	0.64459	-0.00508097
B3	5	CBF8	0.645742	-0.00466908
B3	6	CBF8	0.648651	-0.00250053
B3	7	CBF8	0.649391	-0.00250075
B3	8	CBF8	0.651198	-0.0014341
B3	9	CBF8	0.651647	-0.00172549
B3	10	CBF8	0.655004	0.000891175
B3	11	CBF8	0.655844	0.000990914
B3	12	CBF8	0.656977	0.00138385
B3	13	CBF8	0.658632	0.0022982
B3	14	CBF8	0.659863	0.00278889
B3	15	CBF8	0.660112	0.00229782
B3	16	CBF8	0.661109	0.00255516
B3	17	CBF8	0.663199	0.00390469
B3	18	CBF8	0.662134	0.00209898
B3	19	CBF8	0.66439	0.00361487
B3	20	CBF8	0.664543	0.00302749
B3	21	CBF8	0.664528	0.00227237
B3	22	CBF8	0.665982	0.00298646
B3	23	CBF8	0.665353	0.00161718
B3	24	CBF8	0.666931	0.00245476
B3	25	CBF8	0.667167	0.00195047
B3	26	CBF8	0.667733	0.00177626
B3	27	CBF8	0.667571	0.000873632
B3	28	CBF8	0.66847	0.0010322
B3	29	CBF8	0.668358	0.000180112
B3	30	CBF8	0.669197	0.000278837
B3	31	CBF8	0.669132	-0.000526581
B3	32	CBF8	0.669905	-0.000493182
B3	33	CBF8	0.669406	-0.00173228
B3	34	CBF8	0.66979	-0.00208941
B3	35	CBF8	0.671724	-0.000895156
B3	36	CBF8	0.671228	-0.00213181
B3	37	CBF8	0.671682	-0.0024179
B3	38	CBF8	0.669971	-0.00486906
B3	39	CBF8	0.672415	-0.00316554
B3	40	CBF8	0.670985	-0.00533614
B4	1	CBF8	0.613808	-0.00100814
B4	2	CBF8	0.615364	-0.000277635
B4	3	CBF8	0.614109	-0.00235839
B4	4	CBF8	0.616017	-0.00127544
B4	5	CBF8	0.616721	-0.0013964
B4	6	CBF8	0.617828	-0.0011146
B4	7	CBF8	0.62003	0.000261776
B4	8	CBF8	0.621292	0.000698604
B4	9	CBF8	0.621936	0.000517034
B4	10	CBF8	0.623676	0.00143165
B4	11	CBF8	0.622338	-0.000731651
B4	12	CBF8	0.625252	0.00135778
B4	13	CBF8	0.625438	0.000718024
B4	14	CBF8	0.62731	0.00176509
B4	15	CBF8	0.627471	0.00110054
B4	16	CBF8	0.62892	0.00172399
B4	17	CBF8	0.629162	0.00114068
B4	18	CBF8	0.630397	0.00155081
B4	19	CBF8	0.630969	0.00129706
B4	20	CBF8	0.630633	0.000135588
B4	21	CBF8	0.630607	-0.000714925
B4	22	CBF8	0.6318	-0.000348072
B4	23	CBF8	0.631983	-0.000989551
B4	24	CBF8	0.632844	-0.000953862
B4	25	CBF8	0.632681	-0.00194218
B4	26	CBF8	0.633228	-0.00222043
B4	27	CBF8	0.635101	-0.00117295
B4	28	CBF8	0.636485	-0.000614411
B4	29	CBF8	0.640059	0.00213424
B4	30	CBF8	0.645308	0.00655826
B4	31	CBF8	0.655959	0.0163838
B4	32	CBF8	0.677129	0.0367282
B4	33	CBF8	0.716354	0.0751279
B4	34	CBF8	0.788592	0.14654
B4	35	CBF8	0.917028	0.274151
B4	36	CBF8	1.12801	0.48431
B4	37	CBF8	1.42867	0.78414
B4	38	CBF8	1.79335	1.14799
B4	39	CBF8	2.15849	1.51231
B4	40	CBF8	2.46056	1.81356
B5	1	CBF8	0.701724	-0.00766182
B5	2	CBF8	0.705494	-0.00476037
B5	3	CBF8	0.707145	-0.00397722
B5	4	CBF8	0.708263	-0.00372758
B5	5	CBF8	0.709606	-0.00325263
B5	6	CBF8	0.712121	-0.0016058
B5	7	CBF8	0.714311	-0.000283817
B5	8	CBF8	0.715603	0.000140284
B5	9	CBF8	0.717921	0.00159006
B5	10	CBF8	0.719458	0.00225944
B5	11	CBF8	0.719313	0.00124635
B5	12	CBF8	0.721968	0.00303325
B5	13	CBF8	0.722695	0.00289224
B5	14	CBF8	0.724008	0.00333697
B5	15	CBF8	0.724282	0.00274308
B5	16	CBF8	0.72491	0.002503
B5	17	CBF8	0.725235	0.00196008
B5	18	CBF8	0.725631	0.00148767
B5	19	CBF8	0.725832	0.000820289
B5	20	CBF8	0.727091	0.00121149
B5	21	CBF8	0.726077	-0.000670455
B5	22	CBF8	0.726391	-0.00122435
B5	23	CBF8	0.727848	-0.000635678
B5	24	CBF8	0.727325	-0.00202636
B5	25	CBF8	0.727577	-0.00264218
B5	26	CBF8	0.728814	-0.00227369
B5	27	CBF8	0.72773	-0.00422597
B5	28	CBF8	0.730749	-0.00207506
B5	29	CBF8	0.732783	-0.000909179
B5	30	CBF8	0.738866	0.00430576
B5	31	CBF8	0.748578	0.0131503
B5	32	CBF8	0.769635	0.0333393
B5	33	CBF8	0.807672	0.0705077
B5	34	CBF8	0.879068	0.141035
B5	35	CBF8	1.00421	0.265305
B5	36	CBF8	1.20387	0.464104
B5	37	CBF8	1.48749	0.746851
B5	38	CBF8	1.83085	1.08935
B5	39	CBF8	2.15151	1.40914
B5	40	CBF8	2.4106	1.66736
B6	1	CBF8	0.697649	-0.0022558
B6	2	CBF8	0.699846	-0.000618471
B6	3	CBF8	0.699889	-0.00113674
B6	4	CBF8	0.700333	-0.0012534
B6	5	CBF8	0.699871	-0.00227533
B6	6	CBF8	0.702846	0.00013888
B6	7	CBF8	0.701929	-0.00133897
B6	8	CBF8	0.704401	0.000572779
B6	9	CBF8	0.704733	0.000343886
B6	10	CBF8	0.706113	0.0011632
B6	11	CBF8	0.706236	0.000725333
B6	12	CBF8	0.707922	0.0018509
B6	13	CBF8	0.707338	0.000706833
B6	14	CBF8	0.708624	0.00143221
B6	15	CBF8	0.708992	0.00123962
B6	16	CBF8	0.709318	0.00100506
B6	17	CBF8	0.710522	0.00164794
B6	18	CBF8	0.711006	0.00157134
B6	19	CBF8	0.710859	0.000864299
B6	20	CBF8	0.710944	0.000388107
B6	21	CBF8	0.709527	-0.00158929
B6	22	CBF8	0.710793	-0.000883522
B6	23	CBF8	0.710414	-0.00182302
B6	24	CBF8	0.710083	-0.00271472
B6	25	CBF8	0.712076	-0.00128213
B6	26	CBF8	0.712239	-0.00167971
B6	27	CBF8	0.713333	-0.00114644
B6	28	CBF8	0.714736	-0.000304293
B6	29	CBF8	0.719378	0.00377718
B6	30	CBF8	0.72777	0.0116086
B6	31	CBF8	0.741408	0.0246859
B6	32	CBF8	0.77325	0.0559671
B6	33	CBF8	0.829561	0.111718
B6	34	CBF8	0.93083	0.212427
B6	35	CBF8	1.09947	0.380508
B6	36	CBF8	1.35479	0.635262
B6	37	CBF8	1.68558	0.965496
B6	38	CBF8	2.03092	1.31027
B6	39	CBF8	2.3342	1.613
B6	40	CBF8	2.56592	1.84415
B7	1	CBF9	0.70832	-0.00354974
B7	2	CBF9	0.709124	-0.00304536
B7	3	CBF9	0.708683	-0.00378601
B7	4	CBF9	0.707043	-0.0057265
B7	5	CBF9	0.710734	-0.0023347
B7	6	CBF9	0.710915	-0.00245409
B7	7	CBF9	0.711302	-0.00236671
B7	8	CBF9	0.712622	-0.00134627
B7	9	CBF9	0.713151	-0.00111757
B7	10	CBF9	0.715908	0.00134005
B7	11	CBF9	0.715686	0.000817433
B7	12	CBF9	0.715733	0.000564768
B7	13	CBF9	0.71718	0.00171174
B7	14	CBF9	0.718847	0.00307943
B7	15	CBF9	0.716093	2.57624e-05
B7	16	CBF9	0.71872	0.00235213
B7	17	CBF9	0.718791	0.00212385
B7	18	CBF9	0.720049	0.00308193
B7	19	CBF9	0.720372	0.00310512
B7	20	CBF9	0.720844	0.00327696
B7	21	CBF9	0.718716	0.000848901
B7	22	CBF9	0.720219	0.0020522
B7	23	CBF9	0.720001	0.00153483
B7	24	CBF9	0.720913	0.00214614
B7	25	CBF9	0.721332	0.00226576
B7	26	CBF9	0.721714	0.0023476
B7	27	CBF9	0.720493	0.000826607
B7	28	CBF9	0.721403	0.00143702
B7	29	CBF9	0.719767	-0.000498584
B7	30	CBF9	0.721483	0.000916907
B7	31	CBF9	0.721122	0.000256785
B7	32	CBF9	0.719926	-0.00123965
B7	33	CBF9	0.719749	-0.00171661
B7	34	CBF9	0.720645	-0.00111967
B7	35	CBF9	0.721398	-0.00066691
B7	36	CBF9	0.719704	-0.00266098
B7	37	CBF9	0.721544	-0.00112098
B7	38	CBF9	0.719298	-0.00366675
B7	39	CBF9	0.718975	-0.00428992
B7	40	CBF9	0.719604	-0.00396043
B8	1	CBF9	0.771606	-0.000876664
B8	2	CBF9	0.769446	-0.00300065
B8	3	CBF9	0.766227	-0.00618376
B8	4	CBF9	0.767251	-0.00512367
B8	5	CBF9	0.769609	-0.0027298
B8	6	CBF9	0.769032	-0.00327158
B8	7	CBF9	0.770452	-0.00181578
B8	8	CBF9	0.771367	-0.000864525
B8	9	CBF9	0.77238	0.00018442
B8	10	CBF9	0.770853	-0.00130627
B8	11	CBF9	0.772561	0.000437308
B8	12	CBF9	0.774027	0.00193961
B8	13	CBF9	0.775002	0.00295017
B8	14	CBF9	0.775068	0.00305229
B8	15	CBF9	0.774786	0.00280615
B8	16	CBF9	0.77409	0.00214563
B8	17	CBF9	0.774839	0.00293029
B8	18	CBF9	0.775103	0.00323096
B8	19	CBF9	0.774579	0.00274216
B8	20	CBF9	0.774109	0.00230797
B8	21	CBF9	0.772039	0.00027398
B8	22	CBF9	0.774857	0.00312793
B8	23	CBF9	0.774366	0.00267317
B8	24	CBF9	0.773529	0.00187223
B8	25	CBF9	0.772321	0.000700303
B8	26	CBF9	0.773268	0.00168273
B8	27	CBF9	0.772748	0.00119823
B8	28	CBF9	0.772703	0.00118919
B8	29	CBF9	0.773058	0.0015807
B8	30	CBF9	0.770868	-0.000573632
B8	31	CBF9	0.770569	-0.000836466
B8	32	CBF9	0.770932	-0.00043751
B8	33	CBF9	0.770435	-0.000898648
B8	34	CBF9	0.770358	-0.000939872
B8	35	CBF9	0.768768	-0.00249428
B8	36	CBF9	0.769399	-0.0018271
B8	37	CBF9	0.76812	-0.0030699
B8	38	CBF9	0.768493	-0.00266104
B8	39	CBF9	0.767127	-0.00399158
B8	40	CBF9	0.76655	-0.00453288
B9	1	CBF9	0.74053	-0.00210128
B9	2	CBF9	0.738911	-0.00388239
B9	3	CBF9	0.738037	-0.00491969
B9	4	CBF9	0.739186	-0.00393265
B9	5	CBF9	0.739857	-0.00342441
B9	6	CBF9	0.740863	-0.0025813
B9	7	CBF9	0.742394	-0.00121243
B9	8	CBF9	0.74256	-0.00120904
B9	9	CBF9	0.742778	-0.00115427
B9	10	CBF9	0.74386	-0.000235054
B9	11	CBF9	0.745017	0.000760098
B9	12	CBF9	0.745545	0.00112547
B9	13	CBF9	0.746185	0.00160295
B9	14	CBF9	0.747083	0.00233823
B9	15	CBF9	0.747384	0.00247663
B9	16	CBF9	0.747228	0.00215767
B9	17	CBF9	0.747748	0.00251524
B9	18	CBF9	0.747793	0.00239739
B9	19	CBF9	0.747979	0.00242099
B9	20	CBF9	0.749657	0.00393595
B9	21	CBF9	0.74887	0.00298716
B9	22	CBF9	0.747491	0.00144476
B9	23	CBF9	0.748077	0.00186837
B9	24	CBF9	0.747483	0.00111156
B9	25	CBF9	0.747888	0.00135438
B9	26	CBF9	0.748016	0.00131957
B9	27	CBF9	0.747783	0.00092456
B9	28	CBF9	0.747434	0.000412669
B9	29	CBF9	0.747701	0.000517328
B9	30	CBF9	0.747393	4.60869e-05
B9	31	CBF9	0.747006	-0.000503117
B9	32	CBF9	0.747186	-0.000486196
B9	33	CBF9	0.747134	-0.000700958
B9	34	CBF9	0.747237	-0.00076045
B9	35	CBF9	0.747309	-0.000850996
B9	36	CBF9	0.745936	-0.00238594
B9	37	CBF9	0.743825	-0.00466034
B9	38	CBF9	0.746067	-0.00258074
B9	39	CBF9	0.746691	-0.00211947
B9	40	CBF9	0.743631	-0.00534135
B10	1	CBF9	0.697338	0.00570185
B10	2	CBF9	0.692331	0.000761565
B10	3	CBF9	0.691042	-0.000461478
B10	4	CBF9	0.69051	-0.000927662
B10	5	CBF9	0.689388	-0.00198304
B10	6	CBF9	0.689632	-0.00167323
B10	7	CBF9	0.68912	-0.00211891
B10	8	CBF9	0.69232	0.0011467
B10	9	CBF9	0.691563	0.000456042
B10	10	CBF9	0.691372	0.000331632
B10	11	CBF9	0.691668	0.000693535
B10	12	CBF9	0.69238	0.00147142
B10	13	CBF9	0.693706	0.00286371
B10	14	CBF9	0.692919	0.00214242
B10	15	CBF9	0.691538	0.000827942
B10	16	CBF9	0.691543	0.000899571
B10	17	CBF9	0.691918	0.00134009
B10	18	CBF9	0.691875	0.00136344
B10	19	CBF9	0.691093	0.000647993
B10	20	CBF9	0.690905	0.00052537
B10	21	CBF9	0.690158	-0.000154972
B10	22	CBF9	0.689702	-0.000544623
B10	23	CBF9	0.688734	-0.00144676
B10	24	CBF9	0.68902	-0.00109504
B10	25	CBF9	0.687178	-0.00287015
B10	26	CBF9	0.688997	-0.000984985
B10	27	CBF9	0.686974	-0.00294212
B10	28	CBF9	0.687859	-0.00199084
B10	29	CBF9	0.688033	-0.00175095
B10	30	CBF9	0.69106	0.00134263
B10	31	CBF9	0.694544	0.00489225
B10	32	CBF9	0.703911	0.0143257
B10	33	CBF9	0.720485	0.0309659
B10	34	CBF9	0.754756	0.0653032
B10	35	CBF9	0.821793	0.132406
B10	36	CBF9	0.936828	0.247507
B10	37	CBF9	1.12791	0.438656
B10	38	CBF9	1.41091	0.721724
B10	39	CBF9	1.75863	1.06951
B10	40	CBF9	2.10672	1.41766
B11	1	CBF9	0.752885	-0.00467868
B11	2	CBF9	0.752951	-0.00448721
B11	3	CBF9	0.750818	-0.00649462
B11	4	CBF9	0.752341	-0.00484629
B11	5	CBF9	0.752273	-0.00478839
B11	6	CBF9	0.753474	-0.00346163
B11	7	CBF9	0.755405	-0.00140507
B11	8	CBF9	0.756875	0.000190502
B11	9	CBF9	0.755447	-0.00111172
B11	10	CBF9	0.756687	0.000253902
B11	11	CBF9	0.756909	0.000602132
B11	12	CBF9	0.759363	0.00318226
B11	13	CBF9	0.758163	0.00210719
B11	14	CBF9	0.758653	0.00272281
B11	15	CBF9	0.759145	0.00334134
B11	16	CBF9	0.75727	0.00159209
B11	17	CBF9	0.756934	0.00138194
B11	18	CBF9	0.758784	0.00335678
B11	19	CBF9	0.757122	0.00182139
B11	20	CBF9	0.758822	0.00364692
B11	21	CBF9	0.758589	0.00353893
B11	22	CBF9	0.758173	0.00324934
B11	23	CBF9	0.756602	0.001804
B11	24	CBF9	0.75475	7.7335e-05
B11	25	CBF9	0.756235	0.00168805
B11	26	CBF9	0.756733	0.00231207
B11	27	CBF9	0.755942	0.00164661
B11	28	CBF9	0.754944	0.000774193
B11	29	CBF9	0.754627	0.000582763
B11	30	CBF9	0.754616	0.000698297
B11	31	CBF9	0.75245	-0.00134201
B11	32	CBF9	0.753691	2.4268e-05
B11	33	CBF9	0.752881	-0.000659973
B11	34	CBF9	0.751923	-0.00149197
B11	35	CBF9	0.75075	-0.00253963
B11	36	CBF9	0.751351	-0.00181243
B11	37	CBF9	0.74996	-0.0030777
B11	38	CBF9	0.750057	-0.00285529
B11	39	CBF9	0.748078	-0.00470838
B11	40	CBF9	0.749008	-0.0036524
B12	1	CBF9	0.712142	0.00812733
B12	2	CBF9	0.7069	0.00264999
B12	3	CBF9	0.704604	0.00011879
B12	4	CBF9	0.704089	-0.000631542
B12	5	CBF9	0.703702	-0.00125408
B12	6	CBF9	0.704724	-0.000467149
B12	7	CBF9	0.704443	-0.000983652
B12	8	CBF9	0.706349	0.000687455
B12	9	CBF9	0.707943	0.00204576
B12	10	CBF9	0.707655	0.00152216
B12	11	CBF9	0.707896	0.00152774
B12	12	CBF9	0.706433	-0.000169953
B12	13	CBF9	0.707572	0.000733208
B12	14	CBF9	0.707924	0.000849706
B12	15	CBF9	0.707704	0.000395014
B12	16	CBF9	0.708705	0.0011609
B12	17	CBF9	0.70882	0.00103982
B12	18	CBF9	0.708211	0.000195491
B12	19	CBF9	0.706333	-0.00191734
B12	20	CBF9	0.708093	-0.000392625
B12	21	CBF9	0.707348	-0.00137375
B12	22	CBF9	0.708355	-0.000602073
B12	23	CBF9	0.70757	-0.00162188
B12	24	CBF9	0.706357	-0.00307042
B12	25	CBF9	0.709071	-0.000591728
B12	26	CBF9	0.707414	-0.00248391
B12	27	CBF9	0.707811	-0.00232217
B12	28	CBF9	0.70907	-0.00129843
B12	29	CBF9	0.711101	0.000496897
B12	30	CBF9	0.712984	0.00214464
B12	31	CBF9	0.717338	0.00626311
B12	32	CBF9	0.725132	0.0138215
B12	33	CBF9	0.743294	0.0317483
B12	34	CBF9	0.774697	0.0629163
B12	35	CBF9	0.835893	0.123876
B12	36	CBF9	0.945866	0.233615
B12	37	CBF9	1.13308	0.420596
B12	38	CBF9	1.41521	0.702486
B12	39	CBF9	1.77202	1.05907
B12	40	CBF9	2.13571	1.42252
C1	1	CBF8	0.704885	-0.0122088
C1	2	CBF8	0.707362	-0.0106844
C1	3	CBF8	0.708937	-0.0100628
C1	4	CBF8	0.712882	-0.00707036
C1	5	CBF8	0.714445	-0.00646102
C1	6	CBF8	0.718414	-0.00344532
C1	7	CBF8	0.721431	-0.00138044
C1	8	CBF8	0.72172	-0.00204521
C1	9	CBF8	0.726243	0.00152559
C1	10	CBF8	0.726181	0.000509873
C1	11	CBF8	0.72929	0.00266631
C1	12	CBF8	0.730794	0.0032173
C1	13	CBF8	0.731575	0.0030451
C1	14	CBF8	0.732819	0.00333574
C1	15	CBF8	0.735349	0.0049127
C1	16	CBF8	0.735661	0.00427154
C1	17	CBF8	0.736093	0.00375077
C1	18	CBF8	0.736134	0.00283918
C1	19	CBF8	0.737879	0.0036308
C1	20	CBF8	0.737893	0.00269197
C1	21	CBF8	0.739198	0.00304411
C1	22	CBF8	0.739549	0.00244139
C1	23	CBF8	0.7412	0.00313978
C1	24	CBF8	0.742139	0.0031262
C1	25	CBF8	0.742071	0.00210469
C1	26	CBF8	0.741819	0.000900206
C1	27	CBF8	0.742751	0.000878632
C1	28	CBF8	0.743717	0.000891509
C1	29	CBF8	0.744674	0.000896042
C1	30	CBF8	0.743859	-0.000872068
C1	31	CBF8	0.744557	-0.00112676
C1	32	CBF8	0.744967	-0.00167035
C1	33	CBF8	0.744951	-0.00263904
C1	34	CBF8	0.747536	-0.00100778
C1	35	CBF8	0.747212	-0.00228474
C1	36	CBF8	0.747104	-0.00334564
C1	37	CBF8	0.746922	-0.0044804
C1	38	CBF8	0.749985	-0.00237087
C1	39	CBF8	0.749752	-0.0035567
C1	40	CBF8	0.748222	-0.00603982
C2	1	CBF8	0.6469	-0.00332084
C2	2	CBF8	0.645752	-0.00508167
C2	3	CBF8	0.64614	-0.00530577
C2	4	CBF8	0.647076	-0.00498234
C2	5	CBF8	0.648042	-0.00462869
C2	6	CBF8	0.649583	-0.00370039
C2	7	CBF8	0.652106	-0.00178993
C2	8	CBF8	0.65409	-0.000417813
C2	9	CBF8	0.656212	0.00109139
C2	10	CBF8	0.656539	0.000805722
C2	11	CBF8	0.657344	0.000998319
C2	12	CBF8	0.658472	0.00151409
C2	13	CBF8	0.658942	0.00137213
C2	14	CBF8	0.66035	0.00216751
C2	15	CBF8	0.660789	0.00199384
C2	16	CBF8	0.662737	0.00332917
C2	17	CBF8	0.662582	0.00256166
C2	18	CBF8	0.663701	0.00306891
C2	19	CBF8	0.663361	0.00211609
C2	20	CBF8	0.664246	0.00238843
C2	21	CBF8	0.665453	0.00298336
C2	22	CBF8	0.665973	0.00289111
C2	23	CBF8	0.665401	0.00170636
C2	24	CBF8	0.666077	0.00176986
C2	25	CBF8	0.666614	0.00169465
C2	26	CBF8	0.666122	0.000590551
C2	27	CBF8	0.666552	0.00040752
C2	28	CBF8	0.666449	-0.000307124
C2	29	CBF8	0.66777	0.000401471
C2	30	CBF8	0.668422	0.000441123
C2	31	CBF8	0.668495	-9.87611e-05
C2	32	CBF8	0.669053	-0.000153165
C2	33	CBF8	0.668527	-0.00129202
C2	34	CBF8	0.669828	-0.000602673
C2	35	CBF8	0.669478	-0.00156533
C2	36	CBF8	0.670756	-0.000899892
C2	37	CBF8	0.670202	-0.0020664
C2	38	CBF8	0.668379	-0.00450207
C2	39	CBF8	0.669512	-0.00398093
C2	40	CBF8	0.668828	-0.00527803
C3	1	CBF8	0.68077	-0.00203799
C3	2	CBF8	0.679707	-0.00418649
C3	3	CBF8	0.682261	-0.00271841
C3	4	CBF8	0.683808	-0.00225617
C3	5	CBF8	0.685084	-0.00206644
C3	6	CBF8	0.686603	-0.00163245
C3	7	CBF8	0.68887	-0.000451489
C3	8	CBF8	0.690084	-0.000322971
C3	9	CBF8	0.693422	0.0019298
C3	10	CBF8	0.694197	0.00161903
C3	11	CBF8	0.694466	0.000802037
C3	12	CBF8	0.697625	0.00287528
C3	13	CBF8	0.696365	0.000529426
C3	14	CBF8	0.698575	0.00165376
C3	15	CBF8	0.699057	0.00105033
C3	16	CBF8	0.701	0.00190769
C3	17	CBF8	0.700201	2.30657e-05
C3	18	CBF8	0.702833	0.00156958
C3	19	CBF8	0.704175	0.00182589
C3	20	CBF8	0.705665	0.00223061
C3	21	CBF8	0.703453	-0.00106712
C3	22	CBF8	0.705224	-0.000381539
C3	23	CBF8	0.7076	0.000908673
C3	24	CBF8	0.706425	-0.00135188
C3	25	CBF8	0.708057	-0.000805477
C3	26	CBF8	0.708122	-0.00182685
C3	27	CBF8	0.708595	-0.00243928
C3	28	CBF8	0.708859	-0.00326056
C3	29	CBF8	0.713824	0.000618877
C3	30	CBF8	0.715328	0.0010366
C3	31	CBF8	0.722357	0.0069808
C3	32	CBF8	0.734134	0.017672
C3	33	CBF8	0.757834	0.0402857
C3	34	CBF8	0.800945	0.0823119
C3	35	CBF8	0.881845	0.162126
C3	36	CBF8	1.01822	0.297414
C3	37	CBF8	1.2419	0.520009
C3	38	CBF8	1.55395	0.830971
C3	39	CBF8	1.91783	1.19377
C3	40	CBF8	2.26628	1.54114
C4	1	CBF8	0.578249	-0.00131944
C4	2	CBF8	0.57901	-0.00078147
C4	3	CBF8	0.579911	-0.000103902
C4	4	CBF8	0.578376	-0.00186166
C4	5	CBF8	0.579264	-0.00119613
C4	6	CBF8	0.580388	-0.000295586
C4	7	CBF8	0.581935	0.00102851
C4	8	CBF8	0.582064	0.000934678
C4	9	CBF8	0.581966	0.000613212
C4	10	CBF8	0.58207	0.00049464
C4	11	CBF8	0.583394	0.0015954
C4	12	CBF8	0.583043	0.00102103
C4	13	CBF8	0.582591	0.000346349
C4	14	CBF8	0.582695	0.000227121
C4	15	CBF8	0.583837	0.00114615
C4	16	CBF8	0.582597	-0.000316628
C4	17	CBF8	0.583601	0.000464711
C4	18	CBF8	0.583225	-0.000134811
C4	19	CBF8	0.584234	0.000651297
C4	20	CBF8	0.581921	-0.00188418
C4	21	CBF8	0.584008	-2.04244e-05
C4	22	CBF8	0.583149	-0.00110274
C4	23	CBF8	0.584149	-0.000325577
C4	24	CBF8	0.583796	-0.000901853
C4	25	CBF8	0.583469	-0.00145131
C4	26	CBF8	0.583319	-0.00182445
C4	27	CBF8	0.58461	-0.00075677
C4	28	CBF8	0.583979	-0.00161039
C4	29	CBF8	0.585247	-0.000565952
C4	30	CBF8	0.586671	0.000635183
C4	31	CBF8	0.591453	0.00519409
C4	32	CBF8	0.59659	0.010108
C4	33	CBF8	0.609361	0.0226565
C4	34	CBF8	0.636182	0.0492542
C4	35	CBF8	0.680513	0.0933628
C4	36	CBF8	0.762064	0.17469
C4	37	CBF8	0.893446	0.30585
C4	38	CBF8	1.09069	0.50287
C4	39	CBF8	1.32741	0.739363
C4	40	CBF8	1.56288	0.974613
C5	1	CBF8	0.660228	-0.0111655
C5	2	CBF8	0.663103	-0.00872998
C5	3	CBF8	0.664678	-0.00759421
C5	4	CBF8	0.666527	-0.00618496
C5	5	CBF8	0.668438	-0.0047132
C5	6	CBF8	0.670007	-0.00358398
C5	7	CBF8	0.672316	-0.00171459
C5	8	CBF8	0.673489	-0.00098073
C5	9	CBF8	0.674958	4.85313e-05
C5	10	CBF8	0.676197	0.00084754
C5	11	CBF8	0.677675	0.00188586
C5	12	CBF8	0.677841	0.00161205
C5	13	CBF8	0.679602	0.00293349
C5	14	CBF8	0.679434	0.00232666
C5	15	CBF8	0.680956	0.00340915
C5	16	CBF8	0.680579	0.0025924
C5	17	CBF8	0.681605	0.00317838
C5	18	CBF8	0.682892	0.0040262
C5	19	CBF8	0.681908	0.00260291
C5	20	CBF8	0.682096	0.00235056
C5	21	CBF8	0.682785	0.00260001
C5	22	CBF8	0.683651	0.0030272
C5	23	CBF8	0.683894	0.0028304
C5	24	CBF8	0.68323	0.00172689
C5	25	CBF8	0.684053	0.00210962
C5	26	CBF8	0.683878	0.0014957
C5	27	CBF8	0.683957	0.00113462
C5	28	CBF8	0.684419	0.00115716
C5	29	CBF8	0.685265	0.00156397
C5	30	CBF8	0.684284	0.000143122
C5	31	CBF8	0.682967	-0.0016139
C5	32	CBF8	0.684024	-0.000996323
C5	33	CBF8	0.684436	-0.00102403
C5	34	CBF8	0.684277	-0.0016221
C5	35	CBF8	0.6843	-0.00203908
C5	36	CBF8	0.684525	-0.00225293
C5	37	CBF8	0.684217	-0.0030009
C5	38	CBF8	0.685227	-0.00243066
C5	39	CBF8	0.682246	-0.00585082
C5	40	CBF8	0.685285	-0.00325187
C6	1	CBF8	0.696992	-0.00806027
C6	2	CBF8	0.700687	-0.00458041
C6	3	CBF8	0.701325	-0.00415803
C6	4	CBF8	0.701254	-0.00444464
C6	5	CBF8	0.702586	-0.00332733
C6	6	CBF8	0.703441	-0.00268811
C6	7	CBF8	0.704777	-0.0015671
C6	8	CBF8	0.704918	-0.00164153
C6	9	CBF8	0.707622	0.000846689
C6	10	CBF8	0.707145	0.000154045
C6	11	CBF8	0.707627	0.000420559
C6	12	CBF8	0.708641	0.00121875
C6	13	CBF8	0.709525	0.00188759
C6	14	CBF8	0.710042	0.00218963
C6	15	CBF8	0.70943	0.00136186
C6	16	CBF8	0.711084	0.00280038
C6	17	CBF8	0.709678	0.0011794
C6	18	CBF8	0.710168	0.00145396
C6	19	CBF8	0.710678	0.00174795
C6	20	CBF8	0.711661	0.00251568
C6	21	CBF8	0.712117	0.00275615
C6	22	CBF8	0.712118	0.00254141
C6	23	CBF8	0.711875	0.00208367
C6	24	CBF8	0.712277	0.00226966
C6	25	CBF8	0.711532	0.00130933
C6	26	CBF8	0.71215	0.0017121
C6	27	CBF8	0.710975	0.000321784
C6	28	CBF8	0.712698	0.00182945
C6	29	CBF8	0.712526	0.00144204
C6	30	CBF8	0.711412	0.000111684
C6	31	CBF8	0.710238	-0.00127726
C6	32	CBF8	0.710784	-0.000946315
C6	33	CBF8	0.711863	-8.35159e-05
C6	34	CBF8	0.711459	-0.00070231
C6	35	CBF8	0.709432	-0.00294479
C6	36	CBF8	0.710177	-0.00241602
C6	37	CBF8	0.710373	-0.00243483
C6	38	CBF8	0.711003	-0.00202032
C6	39	CBF8	0.709737	-0.00350165
C6	40	CBF8	0.710794	-0.00266049
C7	1	CBF9	0.65854	-0.00106878
C7	2	CBF9	0.655791	-0.00447591
C7	3	CBF9	0.65626	-0.0046647
C7	4	CBF9	0.655192	-0.00638991
C7	5	CBF9	0.656422	-0.00581791
C7	6	CBF9	0.658517	-0.0043805
C7	7	CBF9	0.660317	-0.00323879
C7	8	CBF9	0.66164	-0.00257344
C7	9	CBF9	0.663327	-0.00154361
C7	10	CBF9	0.665081	-0.000447855
C7	11	CBF9	0.6668	0.000613626
C7	12	CBF9	0.669694	0.00285009
C7	13	CBF9	0.669486	0.00198438
C7	14	CBF9	0.671037	0.00287777
C7	15	CBF9	0.673047	0.00422983
C7	16	CBF9	0.674157	0.00468179
C7	17	CBF9	0.673482	0.00334884
C7	18	CBF9	0.675661	0.00487047
C7	19	CBF9	0.674229	0.00278071
C7	20	CBF9	0.675759	0.003653
C7	21	CBF9	0.6767	0.00393617
C7	22	CBF9	0.676267	0.00284479
C7	23	CBF9	0.677515	0.00343504
C7	24	CBF9	0.677231	0.00249332
C7	25	CBF9	0.677233	0.00183831
C7	26	CBF9	0.678352	0.00229928
C7	27	CBF9	0.678872	0.00216133
C7	28	CBF9	0.677862	0.000493816
C7	29	CBF9	0.678164	0.000137481
C7	30	CBF9	0.679428	0.000743821
C7	31	CBF9	0.679325	-1.65728e-05
C7	32	CBF9	0.67936	-0.000639161
C7	33	CBF9	0.679853	-0.000803688
C7	34	CBF9	0.678205	-0.00310957
C7	35	CBF9	0.678876	-0.00309665
C7	36	CBF9	0.679734	-0.00289592
C7	37	CBF9	0.679363	-0.00392466
C7	38	CBF9	0.68002	-0.00392599
C7	39	CBF9	0.679799	-0.00480494
C7	40	CBF9	0.680317	-0.00494485
C8	1	CBF9	0.73172	0.000695167
C8	2	CBF9	0.729067	-0.00265447
C8	3	CBF9	0.728115	-0.00430336
C8	4	CBF9	0.727234	-0.00588179
C8	5	CBF9	0.726753	-0.00706003
C8	6	CBF9	0.729457	-0.00505271
C8	7	CBF9	0.732045	-0.00316125
C8	8	CBF9	0.732324	-0.00357918
C8	9	CBF9	0.734914	-0.00168641
C8	10	CBF9	0.736494	-0.000803172
C8	11	CBF9	0.738463	0.000467857
C8	12	CBF9	0.740533	0.00184135
C8	13	CBF9	0.741696	0.00230718
C8	14	CBF9	0.744632	0.00454595
C8	15	CBF9	0.74386	0.00307773
C8	16	CBF9	0.745639	0.00415975
C8	17	CBF9	0.746626	0.00444939
C8	18	CBF9	0.748519	0.00564585
C8	19	CBF9	0.747225	0.00365418
C8	20	CBF9	0.748314	0.00404634
C8	21	CBF9	0.749131	0.00416659
C8	22	CBF9	0.749709	0.00404716
C8	23	CBF9	0.749651	0.00329282
C8	24	CBF9	0.749543	0.00248788
C8	25	CBF9	0.749579	0.00182665
C8	26	CBF9	0.751597	0.00314727
C8	27	CBF9	0.75139	0.00224374
C8	28	CBF9	0.751161	0.00131715
C8	29	CBF9	0.75083	0.000289821
C8	30	CBF9	0.751536	0.000298842
C8	31	CBF9	0.751257	-0.000677939
C8	32	CBF9	0.751202	-0.00142965
C8	33	CBF9	0.752393	-0.000935868
C8	34	CBF9	0.751798	-0.00222736
C8	35	CBF9	0.752149	-0.002574
C8	36	CBF9	0.752649	-0.0027708
C8	37	CBF9	0.750341	-0.00577509
C8	38	CBF9	0.753021	-0.00379286
C8	39	CBF9	0.751909	-0.00560202
C8	40	CBF9	0.753017	-0.00519055
C9	1	CBF9	0.759562	-0.000160466
C9	2	CBF9	0.757692	-0.00277546
C9	3	CBF9	0.755696	-0.00551664
C9	4	CBF9	0.754806	-0.00715179
C9	5	CBF9	0.757074	-0.00562951
C9	6	CBF9	0.758226	-0.00522285
C9	7	CBF9	0.759513	-0.00468088
C9	8	CBF9	0.761479	-0.00346056
C9	9	CBF9	0.765107	-0.000577379
C9	10	CBF9	0.765711	-0.000719079
C9	11	CBF9	0.768339	0.00116363
C9	12	CBF9	0.769786	0.00186546
C9	13	CBF9	0.771665	0.00299948
C9	14	CBF9	0.773929	0.00451842
C9	15	CBF9	0.773267	0.00311108
C9	16	CBF9	0.775023	0.00412219
C9	17	CBF9	0.775547	0.00390038
C9	18	CBF9	0.777123	0.00473107
C9	19	CBF9	0.777823	0.00468635
C9	20	CBF9	0.778196	0.0043135
C9	21	CBF9	0.779026	0.00439854
C9	22	CBF9	0.779718	0.00434541
C9	23	CBF9	0.779594	0.00347612
C9	24	CBF9	0.781044	0.00418068
C9	25	CBF9	0.779534	0.00192576
C9	26	CBF9	0.780747	0.00239286
C9	27	CBF9	0.780782	0.00168295
C9	28	CBF9	0.780333	0.000488752
C9	29	CBF9	0.781976	0.00138632
C9	30	CBF9	0.781354	1.93859e-05
C9	31	CBF9	0.780734	-0.00134641
C9	32	CBF9	0.782832	6.76995e-06
C9	33	CBF9	0.782398	-0.00117259
C9	34	CBF9	0.783141	-0.00117481
C9	35	CBF9	0.782389	-0.00267222
C9	36	CBF9	0.780651	-0.00515507
C9	37	CBF9	0.781183	-0.00536853
C9	38	CBF9	0.782463	-0.00483378
C9	39	CBF9	0.783009	-0.005033
C9	40	CBF9	0.780561	-0.00822658
C10	1	CBF9	0.666138	0.00651505
C10	2	CBF9	0.660242	0.00117447
C10	3	CBF9	0.657251	-0.00126092
C10	4	CBF9	0.655268	-0.0026881
C10	5	CBF9	0.653196	-0.00420498
C10	6	CBF9	0.654572	-0.00227386
C10	7	CBF9	0.653979	-0.00231117
C10	8	CBF9	0.653854	-0.00188095
C10	9	CBF9	0.652958	-0.00222178
C10	10	CBF9	0.655432	0.000807921
C10	11	CBF9	0.654214	0.000145172
C10	12	CBF9	0.654445	0.000931531
C10	13	CBF9	0.655263	0.00230565
C10	14	CBF9	0.653751	0.00134816
C10	15	CBF9	0.65426	0.00241329
C10	16	CBF9	0.654494	0.00320239
C10	17	CBF9	0.653265	0.00252849
C10	18	CBF9	0.653095	0.00291371
C10	19	CBF9	0.650602	0.000976376
C10	20	CBF9	0.650081	0.00101047
C10	21	CBF9	0.649372	0.000857753
C10	22	CBF9	0.650432	0.0024725
C10	23	CBF9	0.648987	0.00158259
C10	24	CBF9	0.648057	0.00120863
C10	25	CBF9	0.647725	0.00143226
C10	26	CBF9	0.646068	0.000330523
C10	27	CBF9	0.646697	0.00151415
C10	28	CBF9	0.645613	0.000985568
C10	29	CBF9	0.644458	0.000386476
C10	30	CBF9	0.643213	-0.000303572
C10	31	CBF9	0.643257	0.000296582
C10	32	CBF9	0.642566	0.000160917
C10	33	CBF9	0.640732	-0.00111814
C10	34	CBF9	0.638724	-0.00257042
C10	35	CBF9	0.639913	-0.000826688
C10	36	CBF9	0.637607	-0.00257639
C10	37	CBF9	0.638005	-0.0016232
C10	38	CBF9	0.636994	-0.00207888
C10	39	CBF9	0.636646	-0.00187206
C10	40	CBF9	0.635887	-0.00207537
C11	1	CBF9	0.732796	-0.00713156
C11	2	CBF9	0.732705	-0.00760438
C11	3	CBF9	0.732485	-0.00820631
C11	4	CBF9	0.733695	-0.00737778
C11	5	CBF9	0.733775	-0.00767995
C11	6	CBF9	0.737207	-0.00462943
C11	7	CBF9	0.738701	-0.00351694
C11	8	CBF9	0.740737	-0.0018626
C11	9	CBF9	0.742449	-0.0005319
C11	10	CBF9	0.742766	-0.000597027
C11	11	CBF9	0.745196	0.00145095
C11	12	CBF9	0.747057	0.00293048
C11	13	CBF9	0.747102	0.00259361
C11	14	CBF9	0.749715	0.00482541
C11	15	CBF9	0.748267	0.00299521
C11	16	CBF9	0.749886	0.00423298
C11	17	CBF9	0.750284	0.00424916
C11	18	CBF9	0.752212	0.00579568
C11	19	CBF9	0.751719	0.00492089
C11	20	CBF9	0.751752	0.00457174
C11	21	CBF9	0.752087	0.00452569
C11	22	CBF9	0.752511	0.00456815
C11	23	CBF9	0.751627	0.00330241
C11	24	CBF9	0.752488	0.00378177
C11	25	CBF9	0.751005	0.00191688
C11	26	CBF9	0.752268	0.00279839
C11	27	CBF9	0.751963	0.00211094
C11	28	CBF9	0.75073	0.000497043
C11	29	CBF9	0.751939	0.00132354
C11	30	CBF9	0.749953	-0.00104352
C11	31	CBF9	0.750413	-0.000965353
C11	32	CBF9	0.750366	-0.00139431
C11	33	CBF9	0.751493	-0.000648452
C11	34	CBF9	0.749269	-0.00325452
C11	35	CBF9	0.750149	-0.00275609
C11	36	CBF9	0.749591	-0.00369544
C11	37	CBF9	0.74962	-0.00404828
C11	38	CBF9	0.748918	-0.00513246
C11	39	CBF9	0.748381	-0.00605059
C11	40	CBF9	0.748168	-0.00664602
C12	1	CBF9	0.688446	-0.000598335
C12	2	CBF9	0.687518	-0.00188571
C12	3	CBF9	0.684286	-0.00547668
C12	4	CBF9	0.684401	-0.00572127
C12	5	CBF9	0.686282	-0.00419918
C12	6	CBF9	0.687299	-0.00354159
C12	7	CBF9	0.688458	-0.00274173
C12	8	CBF9	0.688604	-0.00295574
C12	9	CBF9	0.69056	-0.00135896
C12	10	CBF9	0.692572	0.000293961
C12	11	CBF9	0.693258	0.000620563
C12	12	CBF9	0.694495	0.00149845
C12	13	CBF9	0.695206	0.0018508
C12	14	CBF9	0.6966	0.00288491
C12	15	CBF9	0.69732	0.00324531
C12	16	CBF9	0.697124	0.00269042
C12	17	CBF9	0.698698	0.00390548
C12	18	CBF9	0.698624	0.00347165
C12	19	CBF9	0.699219	0.00370789
C12	20	CBF9	0.69986	0.00398913
C12	21	CBF9	0.699879	0.00364906
C12	22	CBF9	0.699594	0.00300512
C12	23	CBF9	0.699845	0.00289661
C12	24	CBF9	0.700961	0.0036532
C12	25	CBF9	0.69991	0.00224274
C12	26	CBF9	0.700346	0.00232002
C12	27	CBF9	0.69893	0.000544422
C12	28	CBF9	0.698342	-0.000402548
C12	29	CBF9	0.700167	0.00106292
C12	30	CBF9	0.699248	-0.000215631
C12	31	CBF9	0.70009	0.000267969
C12	32	CBF9	0.698633	-0.00154893
C12	33	CBF9	0.699451	-0.00108965
C12	34	CBF9	0.70032	-0.000580299
C12	35	CBF9	0.698571	-0.00268873
C12	36	CBF9	0.698783	-0.0028355
C12	37	CBF9	0.697851	-0.00412711
C12	38	CBF9	0.699761	-0.00257647
C12	39	CBF9	0.696956	-0.00574061
C12	40	CBF9	0.697042	-0.00601393
D1	1	CBF8	0.714311	-0.00672291
D1	2	CBF8	0.712793	-0.00898144
D1	3	CBF8	0.71519	-0.00732491
D1	4	CBF8	0.717389	-0.00586632
D1	5	CBF8	0.718417	-0.00557933
D1	6	CBF8	0.72051	-0.00422618
D1	7	CBF8	0.723439	-0.00203791
D1	8	CBF8	0.725297	-0.000920145
D1	9	CBF8	0.727036	7.76978e-05
D1	10	CBF8	0.730218	0.00251917
D1	11	CBF8	0.729943	0.00150374
D1	12	CBF8	0.729808	0.000628152
D1	13	CBF8	0.732105	0.00218527
D1	14	CBF8	0.73304	0.00237976
D1	15	CBF8	0.734399	0.00299786
D1	16	CBF8	0.73499	0.00284813
D1	17	CBF8	0.736203	0.00332056
D1	18	CBF8	0.738546	0.00492375
D1	19	CBF8	0.737678	0.0033152
D1	20	CBF8	0.738903	0.00379895
D1	21	CBF8	0.737469	0.001625
D1	22	CBF8	0.738947	0.00236243
D1	23	CBF8	0.740484	0.00315892
D1	24	CBF8	0.740338	0.00227237
D1	25	CBF8	0.740673	0.00186694
D1	26	CBF8	0.741574	0.00202656
D1	27	CBF8	0.742849	0.00256193
D1	28	CBF8	0.740716	-0.000311787
D1	29	CBF8	0.741027	-0.000741892
D1	30	CBF8	0.742516	7.10164e-06
D1	31	CBF8	0.74384	0.000590454
D1	32	CBF8	0.743812	-0.000177729
D1	33	CBF8	0.743538	-0.00119309
D1	34	CBF8	0.74472	-0.000750884
D1	35	CBF8	0.744047	-0.00216518
D1	36	CBF8	0.743082	-0.00386975
D1	37	CBF8	0.74496	-0.00273303
D1	38	CBF8	0.743886	-0.00454728
D1	39	CBF8	0.744649	-0.00452451
D1	40	CBF8	0.744493	-0.00542108
D2	1	CBF8	0.67267	-0.00376048
D2	2	CBF8	0.67254	-0.00481564
D2	3	CBF8	0.672494	-0.0057871
D2	4	CBF8	0.674189	-0.00501836
D2	5	CBF8	0.674487	-0.00564597
D2	6	CBF8	0.677926	-0.00313223
D2	7	CBF8	0.678638	-0.00334636
D2	8	CBF8	0.682679	-0.000230028
D2	9	CBF8	0.683558	-0.000277327
D2	10	CBF8	0.685199	0.000438254
D2	11	CBF8	0.687128	0.00144232
D2	12	CBF8	0.68896	0.00234864
D2	13	CBF8	0.690092	0.00255454
D2	14	CBF8	0.69021	0.00174728
D2	15	CBF8	0.691076	0.00168723
D2	16	CBF8	0.692264	0.00194993
D2	17	CBF8	0.694698	0.00345855
D2	18	CBF8	0.696132	0.00396707
D2	19	CBF8	0.695426	0.0023356
D2	20	CBF8	0.697006	0.0029896
D2	21	CBF8	0.696774	0.00183199
D2	22	CBF8	0.699586	0.00371874
D2	23	CBF8	0.700458	0.00366489
D2	24	CBF8	0.700292	0.0025729
D2	25	CBF8	0.700288	0.00164423
D2	26	CBF8	0.70189	0.00232017
D2	27	CBF8	0.702664	0.00216856
D2	28	CBF8	0.702121	0.000700587
D2	29	CBF8	0.701635	-0.000711122
D2	30	CBF8	0.70303	-0.000242364
D2	31	CBF8	0.70382	-0.000377758
D2	32	CBF8	0.704495	-0.000627713
D2	33	CBF8	0.705623	-0.000425686
D2	34	CBF8	0.705961	-0.00101348
D2	35	CBF8	0.705851	-0.00204849
D2	36	CBF8	0.704732	-0.00409373
D2	37	CBF8	0.707033	-0.00271761
D2	38	CBF8	0.707559	-0.00311759
D2	39	CBF8	0.706874	-0.00472814
D2	40	CBF8	0.706491	-0.00603644
D3	1	CBF8	0.73659	-0.00772047
D3	2	CBF8	0.737706	-0.00738468
D3	3	CBF8	0.739043	-0.00682842
D3	4	CBF8	0.741142	-0.00551065
D3	5	CBF8	0.743627	-0.00380581
D3	6	CBF8	0.745209	-0.00300433
D3	7	CBF8	0.747873	-0.00112103
D3	8	CBF8	0.749993	0.000218015
D3	9	CBF8	0.750055	-0.000500666
D3	10	CBF8	0.752156	0.00081937
D3	11	CBF8	0.753326	0.00120886
D3	12	CBF8	0.754584	0.00168626
D3	13	CBF8	0.755963	0.00228437
D3	14	CBF8	0.756643	0.00218426
D3	15	CBF8	0.755679	0.00043901
D3	16	CBF8	0.757997	0.00197619
D3	17	CBF8	0.759282	0.00248095
D3	18	CBF8	0.760549	0.00296718
D3	19	CBF8	0.76176	0.00339749
D3	20	CBF8	0.761371	0.00222748
D3	21	CBF8	0.763629	0.00370482
D3	22	CBF8	0.762292	0.00158721
D3	23	CBF8	0.764678	0.00319264
D3	24	CBF8	0.764423	0.00215769
D3	25	CBF8	0.764845	0.00179873
D3	26	CBF8	0.764786	0.000958749
D3	27	CBF8	0.765342	0.000733892
D3	28	CBF8	0.766553	0.00116475
D3	29	CBF8	0.766486	0.000316424
D3	30	CBF8	0.767849	0.000899269
D3	31	CBF8	0.768924	0.00119369
D3	32	CBF8	0.76747	-0.00104128
D3	33	CBF8	0.769203	-8.87627e-05
D3	34	CBF8	0.767874	-0.00219814
D3	35	CBF8	0.768879	-0.00197447
D3	36	CBF8	0.768573	-0.00306109
D3	37	CBF8	0.768746	-0.00366897
D3	38	CBF8	0.770318	-0.00287745
D3	39	CBF8	0.77006	-0.00391621
D3	40	CBF8	0.77088	-0.00387612
D4	1	CBF8	0.60751	-0.0157972
D4	2	CBF8	0.615387	-0.00866173
D4	3	CBF8	0.616665	-0.00812583
D4	4	CBF8	0.618977	-0.00655525
D4	5	CBF8	0.621537	-0.00473684
D4	6	CBF8	0.622929	-0.00408566
D4	7	CBF8	0.625771	-0.00198532
D4	8	CBF8	0.627273	-0.00122489
D4	9	CBF8	0.628724	-0.000516073
D4	10	CBF8	0.63069	0.00070832
D4	11	CBF8	0.631794	0.00107143
D4	12	CBF8	0.633651	0.00218627
D4	13	CBF8	0.634583	0.00237664
D4	14	CBF8	0.635303	0.00235583
D4	15	CBF8	0.636401	0.00271226
D4	16	CBF8	0.637575	0.00314481
D4	17	CBF8	0.639329	0.00415683
D4	18	CBF8	0.639592	0.00367826
D4	19	CBF8	0.640582	0.00392716
D4	20	CBF8	0.641739	0.00434236
D4	21	CBF8	0.64195	0.00381188
D4	22	CBF8	0.641673	0.00279353
D4	23	CBF8	0.641912	0.00229082
D4	24	CBF8	0.64353	0.00316682
D4	25	CBF8	0.643402	0.0022976
D4	26	CBF8	0.643592	0.00174589
D4	27	CBF8	0.644587	0.00199933
D4	28	CBF8	0.644279	0.000949505
D4	29	CBF8	0.644732	0.000660954
D4	30	CBF8	0.644919	0.000106745
D4	31	CBF8	0.645656	0.000102388
D4	32	CBF8	0.644871	-0.00142409
D4	33	CBF8	0.644579	-0.00245794
D4	34	CBF8	0.646387	-0.0013918
D4	35	CBF8	0.647018	-0.00150213
D4	36	CBF8	0.645868	-0.00339333
D4	37	CBF8	0.646094	-0.00390898
D4	38	CBF8	0.645879	-0.00486528
D4	39	CBF8	0.647074	-0.00441223
D4	40	CBF8	0.646327	-0.0059008
D5	1	CBF8	0.705737	-0.0085506
D5	2	CBF8	0.707607	-0.00706875
D5	3	CBF8	0.708047	-0.00701771
D5	4	CBF8	0.71014	-0.0053121
D5	5	CBF8	0.711208	-0.00463241
D5	6	CBF8	0.71342	-0.00280897
D5	7	CBF8	0.714845	-0.00177219
D5	8	CBF8	0.715619	-0.00138629
D5	9	CBF8	0.717357	-3.67577e-05
D5	10	CBF8	0.718554	0.000771918
D5	11	CBF8	0.718912	0.000741957
D5	12	CBF8	0.720067	0.00150927
D5	13	CBF8	0.721405	0.00245855
D5	14	CBF8	0.721753	0.00241852
D5	15	CBF8	0.721975	0.00225206
D5	16	CBF8	0.722636	0.00252531
D5	17	CBF8	0.724222	0.00372314
D5	18	CBF8	0.723798	0.00291087
D5	19	CBF8	0.724481	0.00320545
D5	20	CBF8	0.725273	0.00360971
D5	21	CBF8	0.723724	0.00167198
D5	22	CBF8	0.724823	0.00238362
D5	23	CBF8	0.725873	0.00304543
D5	24	CBF8	0.725106	0.00189008
D5	25	CBF8	0.725459	0.00185499
D5	26	CBF8	0.727027	0.00303453
D5	27	CBF8	0.725509	0.00112791
D5	28	CBF8	0.725148	0.000379058
D5	29	CBF8	0.726696	0.00153922
D5	30	CBF8	0.725848	0.000302505
D5	31	CBF8	0.725092	-0.000841229
D5	32	CBF8	0.725036	-0.00128556
D5	33	CBF8	0.725303	-0.00140726
D5	34	CBF8	0.725886	-0.00121221
D5	35	CBF8	0.72577	-0.00171579
D5	36	CBF8	0.724648	-0.00322669
D5	37	CBF8	0.725665	-0.00259772
D5	38	CBF8	0.725078	-0.00357271
D5	39	CBF8	0.724509	-0.00453048
D5	40	CBF8	0.723851	-0.00557599
D6	1	CBF8	0.700554	-0.00996805
D6	2	CBF8	0.703365	-0.0074691
D6	3	CBF8	0.705951	-0.00519577
D6	4	CBF8	0.707071	-0.0043881
D6	5	CBF8	0.707727	-0.00404476
D6	6	CBF8	0.70967	-0.00241331
D6	7	CBF8	0.710005	-0.00239106
D6	8	CBF8	0.711734	-0.000973818
D6	9	CBF8	0.712594	-0.000426092
D6	10	CBF8	0.714142	0.000809173
D6	11	CBF8	0.715793	0.00214773
D6	12	CBF8	0.715601	0.00164409
D6	13	CBF8	0.715888	0.00161848
D6	14	CBF8	0.716284	0.00170212
D6	15	CBF8	0.716983	0.0020888
D6	16	CBF8	0.717751	0.00254455
D6	17	CBF8	0.718069	0.00255059
D6	18	CBF8	0.717962	0.00213147
D6	19	CBF8	0.717808	0.00166508
D6	20	CBF8	0.718368	0.00191311
D6	21	CBF8	0.718959	0.00219208
D6	22	CBF8	0.717819	0.000738998
D6	23	CBF8	0.720508	0.00311599
D6	24	CBF8	0.719769	0.00206452
D6	25	CBF8	0.719562	0.00154562
D6	26	CBF8	0.720176	0.00184736
D6	27	CBF8	0.720213	0.00157242
D6	28	CBF8	0.719224	0.000270555
D6	29	CBF8	0.721019	0.00175336
D6	30	CBF8	0.720174	0.000596033
D6	31	CBF8	0.719609	-0.000280733
D6	32	CBF8	0.719725	-0.000476575
D6	33	CBF8	0.719405	-0.0011089
D6	34	CBF8	0.719706	-0.00112104
D6	35	CBF8	0.720902	-0.000236731
D6	36	CBF8	0.718443	-0.00300791
D6	37	CBF8	0.718676	-0.00308729
D6	38	CBF8	0.71829	-0.0037856
D6	39	CBF8	0.718813	-0.00357446
D6	40	CBF8	0.718098	-0.00460226
D7	1	CBF9	0.698772	0.000951163
D7	2	CBF9	0.695527	-0.0026066
D7	3	CBF9	0.696402	-0.00204424
D7	4	CBF9	0.696273	-0.00248605
D7	5	CBF9	0.696587	-0.00248523
D7	6	CBF9	0.697884	-0.001501
D7	7	CBF9	0.699039	-0.00065898
D7	8	CBF9	0.699484	-0.000526317
D7	9	CBF9	0.70118	0.000856375
D7	10	CBF9	0.701872	0.00123544
D7	11	CBF9	0.700741	-0.00020796
D7	12	CBF9	0.703149	0.00188778
D7	13	CBF9	0.703055	0.00148049
D7	14	CBF9	0.704515	0.00262798
D7	15	CBF9	0.704152	0.00195216
D7	16	CBF9	0.704202	0.00168941
D7	17	CBF9	0.703275	0.00044902
D7	18	CBF9	0.706241	0.00310254
D7	19	CBF9	0.703653	0.000201329
D7	20	CBF9	0.704521	0.00075635
D7	21	CBF9	0.705604	0.0015266
D7	22	CBF9	0.705767	0.0013768
D7	23	CBF9	0.705457	0.000754035
D7	24	CBF9	0.704059	-0.000956516
D7	25	CBF9	0.705035	-0.000293849
D7	26	CBF9	0.703894	-0.00174744
D7	27	CBF9	0.703604	-0.00235018
D7	28	CBF9	0.704074	-0.00219243
D7	29	CBF9	0.704121	-0.00245834
D7	30	CBF9	0.705758	-0.00113472
D7	31	CBF9	0.706563	-0.000641863
D7	32	CBF9	0.709307	0.0017888
D7	33	CBF9	0.715262	0.00743131
D7	34	CBF9	0.727723	0.019579
D7	35	CBF9	0.74984	0.041383
D7	36	CBF9	0.794506	0.0857363
D7	37	CBF9	0.875373	0.16629
D7	38	CBF9	1.02016	0.31076
D7	39	CBF9	1.25945	0.549741
D7	40	CBF9	1.60366	0.893637
D8	1	CBF9	0.755832	-0.000846266
D8	2	CBF9	0.755813	-0.000791642
D8	3	CBF9	0.752979	-0.00355203
D8	4	CBF9	0.752117	-0.00434003
D8	5	CBF9	0.753166	-0.00321676
D8	6	CBF9	0.753468	-0.00284182
D8	7	CBF9	0.754523	-0.00171288
D8	8	CBF9	0.75422	-0.00194216
D8	9	CBF9	0.755663	-0.000425133
D8	10	CBF9	0.756098	8.42147e-05
D8	11	CBF9	0.757259	0.00131913
D8	12	CBF9	0.757983	0.00211649
D8	13	CBF9	0.757625	0.00183238
D8	14	CBF9	0.756643	0.000924206
D8	15	CBF9	0.757189	0.00154406
D8	16	CBF9	0.758637	0.00306573
D8	17	CBF9	0.757295	0.00179797
D8	18	CBF9	0.759126	0.00370254
D8	19	CBF9	0.758249	0.00289927
D8	20	CBF9	0.757272	0.00199599
D8	21	CBF9	0.757884	0.00268183
D8	22	CBF9	0.755766	0.000637475
D8	23	CBF9	0.756417	0.00136259
D8	24	CBF9	0.756542	0.00156128
D8	25	CBF9	0.756343	0.00143572
D8	26	CBF9	0.755829	0.000995921
D8	27	CBF9	0.755494	0.000734997
D8	28	CBF9	0.755663	0.000977375
D8	29	CBF9	0.754819	0.000206951
D8	30	CBF9	0.754856	0.000318497
D8	31	CBF9	0.754322	-0.000142102
D8	32	CBF9	0.753013	-0.00137708
D8	33	CBF9	0.753354	-0.00096233
D8	34	CBF9	0.752789	-0.00145309
D8	35	CBF9	0.752497	-0.00167199
D8	36	CBF9	0.753168	-0.000926788
D8	37	CBF9	0.751649	-0.002372
D8	38	CBF9	0.752731	-0.00121671
D8	39	CBF9	0.749832	-0.00404171
D8	40	CBF9	0.74998	-0.00381954
D9	1	CBF9	0.750083	-0.00052185
D9	2	CBF9	0.748811	-0.00154352
D9	3	CBF9	0.746625	-0.00347947
D9	4	CBF9	0.746623	-0.00323251
D9	5	CBF9	0.746841	-0.00276454
D9	6	CBF9	0.747924	-0.00143117
D9	7	CBF9	0.748384	-0.000721148
D9	8	CBF9	0.746651	-0.00220422
D9	9	CBF9	0.749801	0.00119559
D9	10	CBF9	0.74788	-0.000475239
D9	11	CBF9	0.748431	0.000325324
D9	12	CBF9	0.74825	0.00039436
D9	13	CBF9	0.749268	0.00166252
D9	14	CBF9	0.748515	0.00115917
D9	15	CBF9	0.748706	0.00159978
D9	16	CBF9	0.747333	0.000476787
D9	17	CBF9	0.747829	0.00122287
D9	18	CBF9	0.747618	0.00126246
D9	19	CBF9	0.748845	0.00273948
D9	20	CBF9	0.74878	0.00292427
D9	21	CBF9	0.748334	0.00272818
D9	22	CBF9	0.748376	0.00302026
D9	23	CBF9	0.745772	0.000665827
D9	24	CBF9	0.746201	0.0013442
D9	25	CBF9	0.744988	0.000382016
D9	26	CBF9	0.744931	0.000574433
D9	27	CBF9	0.744339	0.000232435
D9	28	CBF9	0.744906	0.00104921
D9	29	CBF9	0.745016	0.00140959
D9	30	CBF9	0.743946	0.00058897
D9	31	CBF9	0.74214	-0.000967175
D9	32	CBF9	0.742272	-0.000584976
D9	33	CBF9	0.742157	-0.000449482
D9	34	CBF9	0.741453	-0.000904311
D9	35	CBF9	0.741595	-0.000511861
D9	36	CBF9	0.739989	-0.00186821
D9	37	CBF9	0.738933	-0.00267423
D9	38	CBF9	0.739453	-0.00190425
D9	39	CBF9	0.738322	-0.00278495
D9	40	CBF9	0.736667	-0.00419006
D10	1	CBF9	0.709556	0.00458583
D10	2	CBF9	0.705634	-7.9857e-05
D10	3	CBF9	0.703072	-0.00338644
D10	4	CBF9	0.703869	-0.00333423
D10	5	CBF9	0.704136	-0.0038115
D10	6	CBF9	0.706617	-0.00207487
D10	7	CBF9	0.708774	-0.00066201
D10	8	CBF9	0.709489	-0.000692002
D10	9	CBF9	0.712655	0.00172948
D10	10	CBF9	0.713724	0.0020548
D10	11	CBF9	0.711854	-0.000559772
D10	12	CBF9	0.715401	0.00224241
D10	13	CBF9	0.717356	0.00345339
D10	14	CBF9	0.717068	0.00242084
D10	15	CBF9	0.718272	0.0028805
D10	16	CBF9	0.719265	0.00312893
D10	17	CBF9	0.718205	0.0013245
D10	18	CBF9	0.71977	0.00214525
D10	19	CBF9	0.720298	0.00192899
D10	20	CBF9	0.720465	0.00135123
D10	21	CBF9	0.720616	0.000757918
D10	22	CBF9	0.721526	0.000923548
D10	23	CBF9	0.721765	0.000418209
D10	24	CBF9	0.721007	-0.00108485
D10	25	CBF9	0.723166	0.000329853
D10	26	CBF9	0.720964	-0.00261647
D10	27	CBF9	0.721518	-0.00280698
D10	28	CBF9	0.722125	-0.00294432
D10	29	CBF9	0.722681	-0.00313256
D10	30	CBF9	0.726574	1.6159e-05
D10	31	CBF9	0.731834	0.00453215
D10	32	CBF9	0.7421	0.0140533
D10	33	CBF9	0.762168	0.0333773
D10	34	CBF9	0.801588	0.0720525
D10	35	CBF9	0.874599	0.144319
D10	36	CBF9	1.0053	0.274274
D10	37	CBF9	1.22007	0.488306
D10	38	CBF9	1.53621	0.803693
D10	39	CBF9	1.92758	1.19432
D10	40	CBF9	2.32225	1.58825
D11	1	CBF9	0.693287	-0.00313758
D11	2	CBF9	0.690523	-0.00648105
D11	3	CBF9	0.690944	-0.00664098
D11	4	CBF9	0.690661	-0.00750383
D11	5	CBF9	0.691372	-0.00737289
D11	6	CBF9	0.691981	-0.00734465
D11	7	CBF9	0.696251	-0.00365442
D11	8	CBF9	0.697774	-0.00271214
D11	9	CBF9	0.700589	-0.000477571
D11	10	CBF9	0.701366	-0.000279992
D11	11	CBF9	0.703376	0.00114908
D11	12	CBF9	0.705166	0.00235916
D11	13	CBF9	0.707047	0.0036602
D11	14	CBF9	0.707403	0.00343524
D11	15	CBF9	0.707849	0.0033013
D11	16	CBF9	0.708912	0.0037842
D11	17	CBF9	0.71013	0.0044219
D11	18	CBF9	0.712103	0.0058142
D11	19	CBF9	0.712688	0.00581913
D11	20	CBF9	0.712576	0.00512675
D11	21	CBF9	0.712307	0.00427755
D11	22	CBF9	0.713659	0.00504924
D11	23	CBF9	0.714207	0.00501752
D11	24	CBF9	0.71354	0.00376951
D11	25	CBF9	0.712813	0.00246279
D11	26	CBF9	0.712199	0.0012683
D11	27	CBF9	0.714097	0.00258621
D11	28	CBF9	0.713335	0.00124426
D11	29	CBF9	0.713094	0.000422297
D11	30	CBF9	0.714196	0.000943946
D11	31	CBF9	0.713624	-0.000207806
D11	32	CBF9	0.712491	-0.00192121
D11	33	CBF9	0.714158	-0.000834332
D11	34	CBF9	0.715247	-0.000325856
D11	35	CBF9	0.712584	-0.00356872
D11	36	CBF9	0.712324	-0.00440945
D11	37	CBF9	0.71213	-0.00518361
D11	38	CBF9	0.711317	-0.00657706
D11	39	CBF9	0.711576	-0.00689828
D11	40	CBF9	0.711456	-0.00759811
D12	1	CBF9	0.687653	0.00394735
D12	2	CBF9	0.682291	-0.00189191
D12	3	CBF9	0.679625	-0.00503382
D12	4	CBF9	0.67904	-0.00609583
D12	5	CBF9	0.680711	-0.0049015
D12	6	CBF9	0.681149	-0.0049398
D12	7	CBF9	0.683678	-0.00288764
D12	8	CBF9	0.6849	-0.00214291
D12	9	CBF9	0.686487	-0.00103215
D12	10	CBF9	0.687273	-0.000723486
D12	11	CBF9	0.688368	-0.0001047
D12	12	CBF9	0.691216	0.00226616
D12	13	CBF9	0.691599	0.00217279
D12	14	CBF9	0.692048	0.00214481
D12	15	CBF9	0.694096	0.00371649
D12	16	CBF9	0.694796	0.00393986
D12	17	CBF9	0.695333	0.00399973
D12	18	CBF9	0.695925	0.00411522
D12	19	CBF9	0.696193	0.00390717
D12	20	CBF9	0.696527	0.00376367
D12	21	CBF9	0.697008	0.00376888
D12	22	CBF9	0.697513	0.00379687
D12	23	CBF9	0.695914	0.00172099
D12	24	CBF9	0.697583	0.00291347
D12	25	CBF9	0.697742	0.0025955
D12	26	CBF9	0.698113	0.00249003
D12	27	CBF9	0.697939	0.00183882
D12	28	CBF9	0.696259	-0.000317168
D12	29	CBF9	0.699362	0.00230892
D12	30	CBF9	0.697413	-0.000117016
D12	31	CBF9	0.698228	0.000221091
D12	32	CBF9	0.697608	-0.00087489
D12	33	CBF9	0.69719	-0.00176988
D12	34	CBF9	0.698218	-0.00121851
D12	35	CBF9	0.698328	-0.00158517
D12	36	CBF9	0.697365	-0.00302543
D12	37	CBF9	0.696585	-0.00428163
D12	38	CBF9	0.696215	-0.00512798
D12	39	CBF9	0.696319	-0.00550096
D12	40	CBF9	0.6968	-0.00549658
E1	1	CBF8	0.642772	-0.00913651
E1	2	CBF8	0.643648	-0.0089586
E1	3	CBF8	0.647098	-0.0062056
E1	4	CBF8	0.6468	-0.00720125
E1	5	CBF8	0.650441	-0.00425692
E1	6	CBF8	0.652354	-0.00304082
E1	7	CBF8	0.654207	-0.00188593
E1	8	CBF8	0.655693	-0.00109696
E1	9	CBF8	0.658248	0.00076054
E1	10	CBF8	0.659862	0.00167802
E1	11	CBF8	0.659092	0.000210358
E1	12	CBF8	0.661377	0.00179857
E1	13	CBF8	0.662912	0.00263582
E1	14	CBF8	0.663691	0.00271746
E1	15	CBF8	0.665634	0.00396318
E1	16	CBF8	0.664787	0.00241881
E1	17	CBF8	0.666209	0.00314341
E1	18	CBF8	0.666813	0.00305011
E1	19	CBF8	0.668348	0.00388796
E1	20	CBF8	0.668394	0.00323706
E1	21	CBF8	0.667397	0.00154296
E1	22	CBF8	0.668755	0.00220289
E1	23	CBF8	0.669793	0.00254441
E1	24	CBF8	0.669382	0.00143556
E1	25	CBF8	0.671291	0.00264725
E1	26	CBF8	0.66968	0.000339642
E1	27	CBF8	0.671	0.000961541
E1	28	CBF8	0.669981	-0.000754135
E1	29	CBF8	0.671728	0.000295546
E1	30	CBF8	0.671758	-0.000372161
E1	31	CBF8	0.672643	-0.000184004
E1	32	CBF8	0.673763	0.000239053
E1	33	CBF8	0.672211	-0.00201104
E1	34	CBF8	0.672841	-0.00207769
E1	35	CBF8	0.67463	-0.000985869
E1	36	CBF8	0.673098	-0.0032151
E1	37	CBF8	0.675937	-0.00107352
E1	38	CBF8	0.673171	-0.00453728
E1	39	CBF8	0.675593	-0.00281186
E1	40	CBF8	0.676826	-0.00227698
E2	1	CBF8	0.627902	-0.00284682
E2	2	CBF8	0.628397	-0.00300679
E2	3	CBF8	0.628262	-0.00379571
E2	4	CBF8	0.629694	-0.00301851
E2	5	CBF8	0.631141	-0.00222516
E2	6	CBF8	0.632297	-0.00172388
E2	7	CBF8	0.634233	-0.00044195
E2	8	CBF8	0.634847	-0.000482887
E2	9	CBF8	0.637017	0.00103269
E2	10	CBF8	0.638341	0.00170296
E2	11	CBF8	0.639647	0.00235385
E2	12	CBF8	0.63979	0.00184293
E2	13	CBF8	0.640763	0.00216123
E2	14	CBF8	0.641779	0.0025234
E2	15	CBF8	0.642014	0.00210373
E2	16	CBF8	0.643377	0.00281238
E2	17	CBF8	0.64381	0.00259078
E2	18	CBF8	0.643405	0.00153156
E2	19	CBF8	0.64335	0.000822336
E2	20	CBF8	0.643545	0.000362914
E2	21	CBF8	0.643377	-0.000459917
E2	22	CBF8	0.644433	-5.835e-05
E2	23	CBF8	0.644237	-0.000908897
E2	24	CBF8	0.644491	-0.00130919
E2	25	CBF8	0.646053	-0.000401759
E2	26	CBF8	0.644507	-0.0026014
E2	27	CBF8	0.645824	-0.00193948
E2	28	CBF8	0.645182	-0.00323593
E2	29	CBF8	0.647912	-0.00115989
E2	30	CBF8	0.648673	-0.00105372
E2	31	CBF8	0.653357	0.00297586
E2	32	CBF8	0.661185	0.0101502
E2	33	CBF8	0.674417	0.0227273
[truncated: 1,847 more rows]

## Sheet: BioGroup Analysis Result
Block Type	96alum
Chemistry	SYBR_GREEN
Experiment File Name	D:\HAIFENG\89Untitled.eds
Experiment Run End Time	2021-08-29 16:18:57 PM CST
Instrument Type	sds7500
Passive Reference	ROX
Biogroup Name	Target Name	Task	RQ	RQ Min	RQ Max	Cт Mean	ΔCт Mean	ΔCт SE	ΔΔCт
Analysis Type	Singleplex
Endogenous Control	CBF8
RQ Min/Max Confidence Level	95.0
Reference Biogroup Name

## Sheet: Technical Analysis Result
Block Type	96alum
Chemistry	SYBR_GREEN
Experiment File Name	D:\HAIFENG\89Untitled.eds
Experiment Run End Time	2021-08-29 16:18:57 PM CST
Instrument Type	sds7500
Passive Reference	ROX
Sample Name	Target Name	Task	RQ	RQ Min	RQ Max	Cт Mean	ΔCт Mean	ΔCт SE	ΔΔCт
3-1	CBF9	UNKNOWN
6-3	CBF9	UNKNOWN
3-2	CBF9	UNKNOWN
12-1	CBF9	UNKNOWN				35.4117	0.803807	0.21385
3-3	CBF9	UNKNOWN
12-2	CBF9	UNKNOWN
9-1	CBF9	UNKNOWN				37.0009
12-3	CBF9	UNKNOWN				35.215
9-2	CBF9	UNKNOWN
24-1	CBF9	UNKNOWN				35.4327	-0.58959	0.0557732
24-2	CBF9	UNKNOWN				35.0374	-0.541652	0.701074
6-1	CBF9	UNKNOWN				35.565
24-3	CBF9	UNKNOWN				35.5201
6-2	CBF9	UNKNOWN
Analysis Type	Singleplex
Endogenous Control	CBF8
RQ Min/Max Confidence Level	95.0
Reference Sample	3-1
