# Supplementary material for: Genome-wide identification of CBF genes and their responses to cold acclimation in Taraxacum kok-saghyz
Source: PeerJ journal article supplement (doi:10.7717/peerj.13429), 2022-05-12
Supplement: Raw_data.zip [file CBF9-CBF10.xls]

## Sheet: Results
Block Type	96alum
Chemistry	SYBR_GREEN
Experiment File Name	D:\HAIFENG\CBF910Untitled.eds
Experiment Run End Time	2013-01-10 13:02:24 PM CST
Instrument Type	sds7500
Passive Reference	ROX
Well	Sample Name	Target Name	Task	Reporter	Quencher	RQ	RQ Min	RQ Max	Cт	Cт Mean	Cт SD	ΔCт	ΔCт Mean	ΔCт SE	HK Control ΔCт Mean	HK Control ΔCт SE	ΔΔCт	Automatic Ct Threshold	Ct Threshold	Automatic Baseline	Baseline Start	Baseline End	Efficiency	Tm1	Tm2	Tm3	Comments	HIGHSD	NOAMP	EXPFAIL
A2	3-1	CBF9	UNKNOWN	SYBR	None				29.3887	29.3887								TRUE	0.16944	TRUE	3	39	1	64.3132				N	Y	Y
A3	3-1	CBF9	UNKNOWN	SYBR	None				29.3834	29.3887								TRUE	0.16944	TRUE	3	39	1	62.5566				N	Y	Y
A4	3-1	CBF9	UNKNOWN	SYBR	None				29.394	29.3887								TRUE	0.16944	TRUE	3	39	1	62.381				N	Y	Y
A5	12-3	CBF9	UNKNOWN	SYBR	None				33.1278	33.2342	0.711428							TRUE	0.16944	TRUE	3	39	1	62.9079				N	Y	Y
A6	12-3	CBF9	UNKNOWN	SYBR	None				33.2904	33.2342	0.711428							TRUE	0.16944	TRUE	3	30	1	85.7439				Y	N	N
A7	12-3	CBF9	UNKNOWN	SYBR	None				33.2843	33.2342	0.711428							TRUE	0.16944	TRUE	3	30	1	85.5683				Y	N	N
A8	6-2	CBF10	UNKNOWN	SYBR	None				29.4132	29.4545	0.05141							TRUE	0.269198	TRUE	3	22	1	81.1767				N	N	N
A9	6-2	CBF10	UNKNOWN	SYBR	None				29.4382	29.4545	0.05141							TRUE	0.269198	TRUE	3	22	1	81.1767				N	N	N
A10	6-2	CBF10	UNKNOWN	SYBR	None				29.5121	29.4545	0.05141							TRUE	0.269198	TRUE	3	22	1	81.1767				N	N	N
B2	3-2	CBF9	UNKNOWN	SYBR	None				29.6743	29.5862								TRUE	0.16944	TRUE	3	39	1	64.1376				N	Y	Y
B3	3-2	CBF9	UNKNOWN	SYBR	None				29.6784	29.5862								TRUE	0.16944	TRUE	3	39	1	62.381				N	Y	Y
B4	3-2	CBF9	UNKNOWN	SYBR	None				29.4058	29.5862								TRUE	0.16944	TRUE	3	39	1	62.5566				N	Y	Y
B5	24-1	CBF9	UNKNOWN	SYBR	None				35.5116	35.9157	0.94144							TRUE	0.16944	TRUE	3	30	1	85.9196				Y	N	N
B6	24-1	CBF9	UNKNOWN	SYBR	None				36.257	35.9157	0.94144							TRUE	0.16944	TRUE	3	31	1	85.7439				Y	N	N
B7	24-1	CBF9	UNKNOWN	SYBR	None				35.9785	35.9157	0.94144							TRUE	0.16944	TRUE	3	32	1	85.7439				Y	N	N
B8	6-3	CBF10	UNKNOWN	SYBR	None				30.2173	30.2292	0.103212							TRUE	0.269198	TRUE	3	23	1	81.3524				N	N	N
B9	6-3	CBF10	UNKNOWN	SYBR	None				30.3401	30.2292	0.103212							TRUE	0.269198	TRUE	3	23	1	81.3524				N	N	N
B10	6-3	CBF10	UNKNOWN	SYBR	None				30.1302	30.2292	0.103212							TRUE	0.269198	TRUE	3	23	1	81.1767				N	N	N
C2	3-3	CBF9	UNKNOWN	SYBR	None				29.2674	29.2635								TRUE	0.16944	TRUE	3	39	1	63.2593				N	Y	Y
C3	3-3	CBF9	UNKNOWN	SYBR	None				29.2758	29.2635								TRUE	0.16944	TRUE	3	39	1	62.7323				N	Y	Y
C4	3-3	CBF9	UNKNOWN	SYBR	None				29.2473	29.2635								TRUE	0.16944	TRUE	3	39	1	62.0296				N	Y	Y
C5	24-2	CBF9	UNKNOWN	SYBR	None				35.658	35.6426	0.254213							TRUE	0.16944	TRUE	3	26	1	85.9196				N	N	N
C6	24-2	CBF9	UNKNOWN	SYBR	None				35.6314	35.6426	0.254213							TRUE	0.16944	TRUE	3	26	1	86.0952				N	N	N
C7	24-2	CBF9	UNKNOWN	SYBR	None				35.6383	35.6426	0.254213							TRUE	0.16944	TRUE	3	26	1	86.0952				N	N	N
C8	12-1	CBF10	UNKNOWN	SYBR	None				27.0636	26.8919	0.225112							TRUE	0.269198	TRUE	3	25	1	81.3524				N	N	N
C9	12-1	CBF10	UNKNOWN	SYBR	None				26.9281	26.8919	0.225112							TRUE	0.269198	TRUE	3	24	1	81.3524				N	N	N
C10	12-1	CBF10	UNKNOWN	SYBR	None				26.684	26.8919	0.225112							TRUE	0.269198	TRUE	3	24	1	81.1767				N	N	N
D2	6-1	CBF9	UNKNOWN	SYBR	None				30.7437	30.7572	0.0264495							TRUE	0.16944	TRUE	3	21	1	85.9196				N	N	N
D3	6-1	CBF9	UNKNOWN	SYBR	None				30.7403	30.7572	0.0264495							TRUE	0.16944	TRUE	3	21	1	86.0952				N	N	N
D4	6-1	CBF9	UNKNOWN	SYBR	None				30.7877	30.7572	0.0264495							TRUE	0.16944	TRUE	3	21	1	86.0952				N	N	N
D5	24-3	CBF9	UNKNOWN	SYBR	None				35.2244	35.1208	1.56501							TRUE	0.16944	TRUE	3	31	1	85.9196				Y	N	N
D6	24-3	CBF9	UNKNOWN	SYBR	None				35.1267	35.1208	1.56501							TRUE	0.16944	TRUE	3	39	1	62.5566				N	Y	Y
D7	24-3	CBF9	UNKNOWN	SYBR	None				35.0112	35.1208	1.56501							TRUE	0.16944	TRUE	3	28	1	86.0952				Y	N	N
D8	12-2	CBF10	UNKNOWN	SYBR	None				30.3693	30.5411	0.280867							TRUE	0.269198	TRUE	3	28	1	81.3524				N	N	N
D9	12-2	CBF10	UNKNOWN	SYBR	None				30.6143	30.5411	0.280867							TRUE	0.269198	TRUE	3	28	1	81.3524				N	N	N
D10	12-2	CBF10	UNKNOWN	SYBR	None				30.6396	30.5411	0.280867							TRUE	0.269198	TRUE	3	28	1	81.1767				N	N	N
E2	6-2	CBF9	UNKNOWN	SYBR	None				29.8104	30.1949	0.153303							TRUE	0.16944	TRUE	3	23	1	85.9196				N	N	N
E3	6-2	CBF9	UNKNOWN	SYBR	None				30.3143	30.1949	0.153303							TRUE	0.16944	TRUE	3	22	1	85.9196				N	N	N
E4	6-2	CBF9	UNKNOWN	SYBR	None				30.4601	30.1949	0.153303							TRUE	0.16944	TRUE	3	23	1	86.0952				N	N	N
E5	3-1	CBF10	UNKNOWN	SYBR	None				29.6813	29.6326								TRUE	0.269198	TRUE	3	39	1	62.7323				N	Y	Y
E6	3-1	CBF10	UNKNOWN	SYBR	None				29.5418	29.6326								TRUE	0.269198	TRUE	3	39	1	62.5566				N	Y	Y
E7	3-1	CBF10	UNKNOWN	SYBR	None				29.6746	29.6326								TRUE	0.269198	TRUE	3	39	1	62.9079				N	Y	Y
E8	12-3	CBF10	UNKNOWN	SYBR	None				30.327	30.2373	0.115384							TRUE	0.269198	TRUE	3	39	1	62.5566				N	Y	Y
E9	12-3	CBF10	UNKNOWN	SYBR	None				30.5102	30.2373	0.115384							TRUE	0.269198	TRUE	3	31	1	81.1767				N	N	N
E10	12-3	CBF10	UNKNOWN	SYBR	None				29.8746	30.2373	0.115384							TRUE	0.269198	TRUE	3	32	1	81.0011				N	N	N
F2	6-3	CBF9	UNKNOWN	SYBR	None				31.0223	31.2418	0.514526							TRUE	0.16944	TRUE	3	24	1	85.7439				Y	N	N
F3	6-3	CBF9	UNKNOWN	SYBR	None				31.0302	31.2418	0.514526							TRUE	0.16944	TRUE	3	23	1	85.9196				Y	N	N
F4	6-3	CBF9	UNKNOWN	SYBR	None				31.6729	31.2418	0.514526							TRUE	0.16944	TRUE	3	24	1	85.9196				Y	N	N
F5	3-2	CBF10	UNKNOWN	SYBR	None				29.4703	29.4734								TRUE	0.269198	TRUE	3	39	1	62.5566				N	Y	Y
F6	3-2	CBF10	UNKNOWN	SYBR	None				29.4422	29.4734								TRUE	0.269198	TRUE	3	39	1	62.2053				N	Y	Y
F7	3-2	CBF10	UNKNOWN	SYBR	None				29.5079	29.4734								TRUE	0.269198	TRUE	3	35	1	62.7323				N	N	N
F8	24-1	CBF10	UNKNOWN	SYBR	None				34.2685	34.3208	0.120531							TRUE	0.269198	TRUE	3	27	1	81.3524				N	N	N
F9	24-1	CBF10	UNKNOWN	SYBR	None				34.166	34.3208	0.120531							TRUE	0.269198	TRUE	3	28	1	81.1767				N	N	N
F10	24-1	CBF10	UNKNOWN	SYBR	None				34.5279	34.3208	0.120531							TRUE	0.269198	TRUE	3	27	1	81.0011				N	N	N
G2	12-1	CBF9	UNKNOWN	SYBR	None				29.7658	29.7277	0.286381							TRUE	0.16944	TRUE	3	25	1	85.7439				N	N	N
G3	12-1	CBF9	UNKNOWN	SYBR	None				29.6969	29.7277	0.286381							TRUE	0.16944	TRUE	3	26	1	85.7439				N	N	N
G4	12-1	CBF9	UNKNOWN	SYBR	None				29.7205	29.7277	0.286381							TRUE	0.16944	TRUE	3	26	1	85.7439				N	N	N
G5	3-3	CBF10	UNKNOWN	SYBR	None				29.4047	29.5406								TRUE	0.269198	TRUE	3	39	1	62.5566				N	Y	Y
G6	3-3	CBF10	UNKNOWN	SYBR	None				29.602	29.5406								TRUE	0.269198	TRUE	3	39	1	62.5566				N	Y	Y
G7	3-3	CBF10	UNKNOWN	SYBR	None				29.6151	29.5406								TRUE	0.269198	TRUE	3	39	1	62.2053				N	Y	Y
G8	24-2	CBF10	UNKNOWN	SYBR	None				34.2678	34.2182	0.0813168							TRUE	0.269198	TRUE	3	25	1	81.1767				N	N	N
G9	24-2	CBF10	UNKNOWN	SYBR	None				34.052	34.2182	0.0813168							TRUE	0.269198	TRUE	3	25	1	81.1767				N	N	N
G10	24-2	CBF10	UNKNOWN	SYBR	None				34.3348	34.2182	0.0813168							TRUE	0.269198	TRUE	3	25	1	81.0011				N	N	N
H2	12-2	CBF9	UNKNOWN	SYBR	None				33.6136	33.5741	1.54671							TRUE	0.16944	TRUE	3	28	1	85.3926				Y	N	N
H3	12-2	CBF9	UNKNOWN	SYBR	None				33.5455	33.5741	1.54671							TRUE	0.16944	TRUE	3	28	1	85.5683				Y	N	N
H4	12-2	CBF9	UNKNOWN	SYBR	None				33.5631	33.5741	1.54671							TRUE	0.16944	TRUE	3	31	1	85.3926				Y	N	N
H5	6-1	CBF10	UNKNOWN	SYBR	None				30.0387	29.934	0.124196							TRUE	0.269198	TRUE	3	22	1	81.1767				N	N	N
H6	6-1	CBF10	UNKNOWN	SYBR	None				29.7967	29.934	0.124196							TRUE	0.269198	TRUE	3	22	1	81.3524				N	N	N
H7	6-1	CBF10	UNKNOWN	SYBR	None				29.9664	29.934	0.124196							TRUE	0.269198	TRUE	3	23	1	81.3524				N	N	N
H8	24-3	CBF10	UNKNOWN	SYBR	None				33.6394	33.3754	0.27949							TRUE	0.269198	TRUE	3	28	1	81.0011				N	N	N
H9	24-3	CBF10	UNKNOWN	SYBR	None				33.2779	33.3754	0.27949							TRUE	0.269198	TRUE	3	29	1	80.8254				N	N	N
H10	24-3	CBF10	UNKNOWN	SYBR	None				33.2088	33.3754	0.27949							TRUE	0.269198	TRUE	3	29	1	80.6497				N	N	N
Analysis Type	Singleplex
Endogenous Control	CBF9
RQ Min/Max Confidence Level	95.0
Reference Sample	3-1

## Sheet: Raw Data
Block Type	96alum
Chemistry	SYBR_GREEN
Experiment File Name	D:\HAIFENG\CBF910Untitled.eds
Experiment Run End Time	2013-01-10 13:02:24 PM CST
Instrument Type	sds7500
Passive Reference	ROX
Well	Cycle	1	2	3	4	5
A1	1	40367.4	4812.23	2860.6	3864.65	1521.16
A2	1	234695	46760.5	40923	342645	1766.7
A3	1	188786	42649.2	34193.7	282632	989.691
A4	1	334541	71984.1	57536.7	425471	1954.46
A5	1	297416	63044.7	60390.6	437653	2176.67
A6	1	191951	42873.4	43445.8	321456	1192.86
A7	1	232811	51828.6	49500.4	354780	1752.7
A8	1	421140	89923.3	76733.7	528664	3494.45
A9	1	384984	85016.6	71160.6	508770	2798.35
A10	1	386147	84518.5	61602.4	438021	3353.46
A11	1	0	0	0	0	0
A12	1	0	57.1779	0	915.797	674.343
B1	1	0	0	0	90.1487	173.18
B2	1	286901	65999.5	52941.5	414614	2299.29
B3	1	183481	42239.2	39144.5	300687	837.593
B4	1	337305	74425.8	64339.6	447704	8470.14
B5	1	306311	70679.9	83567.4	597561	3006.46
B6	1	198595	46970.3	60750.3	432933	1775.7
B7	1	241475	55868.7	69237.9	491408	2173.82
B8	1	433946	92915.9	81739.6	526216	3380.98
B9	1	362466	79608.7	69304.2	464448	2708.04
B10	1	371024	82297.4	66456.9	451238	3510.95
B11	1	0	0	131.86	47.7341	0
B12	1	0	0	0	0	0
C1	1	1638.98	756.975	655.3	614.701	608.484
C2	1	307933	73752.5	60867.1	449729	4780.91
C3	1	196941	46110.7	44337.7	318597	1595.71
C4	1	311849	73198.5	65465.7	435745	2715.37
C5	1	320148	69767	74063	481227	2702.21
C6	1	194952	43519.9	50448.8	331986	1861.24
C7	1	254504	57133.5	61283.7	393950	2608.68
C8	1	404011	88008.8	82548.6	511377	3617.31
C9	1	368509	88558.4	72426.1	458580	2387.87
C10	1	362499	82176.2	68821.3	456493	2804.61
C11	1	591.089	536.979	272.78	567.543	520.832
C12	1	0	0	0	565.647	30.7549
D1	1	30218.1	6378.29	5045.85	7017.42	4403.44
D2	1	351990	80255.6	69770.4	495652	2330.87
D3	1	225929	52229.1	52439.4	360117	1998.13
D4	1	354888	77644.1	75008.3	469983	3004.37
D5	1	371480	80639.2	86396.2	527828	3191.12
D6	1	226075	50023.4	59858.9	372345	1853.9
D7	1	289246	64407.4	72155.2	432877	2971.73
D8	1	429543	94690.7	92547.3	552430	3744.78
D9	1	385926	87731.2	82182.5	502524	3327.14
D10	1	402622	93568.1	81585.8	523448	3188.75
D11	1	14973.4	4671.51	4301.66	6766.46	2826.51
D12	1	8211.19	790.317	725.659	1094.94	203.623
E1	1	3388.81	830.905	434.917	893.051	344.441
E2	1	351957	81398.9	73988.3	517644	2777.12
E3	1	239306	58295.1	58263.8	385278	1908.7
E4	1	412282	92878.9	94122.2	568731	2926.25
E5	1	425467	96585.9	92796.1	551993	3077.71
E6	1	266180	60660.5	63777.8	379630	2179.02
E7	1	315916	71611.1	73717.3	431852	2382.21
E8	1	518390	117983	112835	654675	4179.27
E9	1	431947	100610	92076.3	554155	3349.17
E10	1	425770	99916.9	85300.3	538712	3179.66
E11	1	17957.3	2582.41	1929.38	2526.04	1343.92
E12	1	4656.06	1178.79	950.454	2344.33	2569.9
F1	1	45369	8329.01	5874.43	6941.55	3811.36
F2	1	354266	89154.2	76149.9	528737	2877.79
F3	1	268030	64771.7	64218.6	422588	2085.94
F4	1	431836	98197.3	94422.2	575504	3542.15
F5	1	473251	107314	104285	632913	3170.35
F6	1	283941	69055.9	68401.8	413273	59195.5
F7	1	343916	80444.9	80948.7	480552	2811.53
F8	1	549945	126469	115466	668032	5087.47
F9	1	505571	118816	105637	635468	4146.79
F10	1	458780	107930	90238.6	576448	2950.33
F11	1	16909.8	2693.15	1579.25	2392.29	85.8077
F12	1	0	0	0	0	406.532
G1	1	16268.6	4462.8	5036.94	10246.2	13202.6
G2	1	412258	97729.3	80583.8	573269	2886.87
G3	1	318579	75451.2	71976.4	497490	1450.88
G4	1	473858	110489	100196	629107	3744.15
G5	1	468638	108331	98864.5	611950	3493.4
G6	1	301022	70318.5	69957.3	435104	2148.94
G7	1	344895	81578.2	78904.9	487358	4562.99
G8	1	542381	122682	113874	682850	4620.57
G9	1	543922	128026	110627	679837	4652.45
G10	1	436503	103434	87578.8	580294	2258.78
G11	1	10377	2604.89	2409.86	3962.4	2313.57
G12	1	76697.9	15048.1	12296.9	17120.2	9568.51
H1	1	26677	4836.72	3636.27	5937.84	6099.09
H2	1	407070	99916.1	78028	575710	3033.72
H3	1	294833	72421.4	64246.5	461856	2271.74
H4	1	470310	105657	95355.5	627739	4306.18
H5	1	510996	122179	107395	683204	3821.75
H6	1	309261	76113.6	71733.7	469382	2393.55
H7	1	375697	89590.9	85799.4	559368	3014.42
H8	1	556432	122839	112252	709158	4903.64
H9	1	562597	130143	108358	694002	4840.41
H10	1	483524	114366	93860.8	647020	4095.96
H11	1	10415.7	1387.13	600.41	1421.1	1241.06
H12	1	18604.7	3089.8	1531.92	4147.08	3572.95
A1	2	39573.2	4959.95	2906.98	3737.44	1356.51
A2	2	230817	45841.1	40553.4	339243	1597.89
A3	2	187997	43061.8	33874	280622	1221.17
A4	2	332848	71801.1	57325.3	424677	2315.18
A5	2	296287	63052	60359.6	436425	2077.03
A6	2	192062	42904.5	43283.3	320505	834.041
A7	2	232854	52552.5	49281.7	353755	1693.98
A8	2	418055	89365.3	76373.4	526717	3296.86
A9	2	380816	84236.9	70649.7	506255	2953.55
A10	2	383503	84506.3	61501.7	435703	3363.52
A11	2	0	0	0	0	0
A12	2	0	64.9047	0	802.91	432.519
B1	2	0	0	0	342.838	0
B2	2	286605	65944.6	53048.1	413443	2240.56
B3	2	183292	42266.5	39047.9	299562	978.826
B4	2	337832	74774	64301.6	448267	9115.19
B5	2	306853	70638.6	83747.3	596192	3143.81
B6	2	199103	47110.9	60848	432541	2210.75
B7	2	242394	56562.2	69214.7	491050	2285.46
B8	2	433691	93184.4	81852.6	526030	3703.17
B9	2	358771	78950.1	69162.8	463277	2662.04
B10	2	369258	82222.9	66119.2	449453	3290.95
B11	2	0	22.9429	51.1085	0	0
B12	2	0	0	0	0	120.912
C1	2	1534.11	819.192	566.384	738.883	335.588
C2	2	308155	73992.2	60831.4	449524	5176.64
C3	2	196537	46405.8	44317.1	317026	1788.62
C4	2	312556	73310.8	65838.9	436660	3051.38
C5	2	320231	70036	74399.2	482189	2654.77
C6	2	195822	43816.5	50603	331972	1921.46
C7	2	255083	57884.8	61352.1	394957	2476.56
C8	2	402675	87633	82728.7	512443	3704.73
C9	2	366210	87975	72544.1	459063	2458.95
C10	2	362191	82197.3	68983	457315	2682.03
C11	2	581.837	368.358	271.774	596.934	686.273
C12	2	0	0	0	268.517	75.7889
D1	2	29950.5	6670.73	5084.05	6920.46	4614.18
D2	2	351008	80678.7	69783.6	495206	2169.84
D3	2	226276	52474.2	52352.2	359694	2060.19
D4	2	355588	77873.1	75193.1	471203	2952.06
D5	2	371466	80828.7	86420.7	527879	3424.17
D6	2	226106	50343.8	59950.2	371807	2025.67
D7	2	290586	64898	72123.2	433852	2678.98
D8	2	429222	95132.1	93060.4	554378	3580.87
D9	2	384171	87716.3	82270.5	504164	3514.32
D10	2	403196	94189.4	81748.6	524801	2990.45
D11	2	14459.2	4568.44	4305.52	6430.1	3131.8
D12	2	8175.13	940.649	669.917	945.856	555.515
E1	2	3875.35	799.473	667.67	612.26	83.3766
E2	2	351699	81895.9	74203.7	517553	2971.82
E3	2	242406	60020.8	58327	385093	2092.71
E4	2	412747	93572.8	94242.6	569746	3765.53
E5	2	424261	96727	93173.5	552466	3266.89
E6	2	265302	60752.6	63744.7	379299	2593.14
E7	2	316431	72607.8	73872.6	432533	2013.31
E8	2	517727	118305	113557	656095	4066.35
E9	2	429619	99627.5	92221.2	554115	3276.65
E10	2	425341	100036	85579.8	540522	3457.87
E11	2	17893.9	2751.57	1999.52	2331.32	1092.72
E12	2	5083.73	1136.41	876.704	2403.14	2429.38
F1	2	45288.7	8114.05	5848.73	7237.78	3812.84
F2	2	352367	88589.3	75829.2	524881	3113.02
F3	2	269040	65464.3	64472.9	423034	2093.24
F4	2	433350	98525.5	94981.6	577660	3703.58
F5	2	471032	106812	104973	634811	3659.09
F6	2	282419	68902.2	68539.1	412159	59179.7
F7	2	344641	81354.5	81327.2	481883	2451.96
F8	2	547987	126114	115793	670612	5550.98
F9	2	503791	118726	105899	636541	3855.6
F10	2	457922	107896	90415.2	578505	3209.33
F11	2	17077.6	2341.45	1608.33	2596.53	0
F12	2	0	0	0	0	498.496
G1	2	16554.1	4655.48	4967.22	10376.4	12927.1
G2	2	413005	98388.3	80603.8	572991	2621.86
G3	2	319542	75932.8	72364.6	497574	1863.79
G4	2	475324	110693	100728	632560	3786.59
G5	2	467098	108551	99390.7	613910	3326.46
G6	2	300105	70080.1	69881.6	433782	2698.9
G7	2	343699	81601.6	79004.6	486811	4751.67
G8	2	540582	122136	114206	682481	4775.08
G9	2	543944	128179	111010	682725	4571.29
G10	2	434338	102962	87988.2	580128	2489.03
G11	2	10132.4	2538.58	2587.32	3793.71	2638.72
G12	2	76998.7	15431.4	12418.2	16909.2	10078.1
H1	2	27168.7	5081.04	3989.66	5917.11	6693.71
H2	2	405412	100084	77968.6	575912	2919.24
H3	2	293636	72319	64107.1	459888	1964.01
H4	2	467868	105611	95160.7	626232	4152.85
H5	2	509042	121798	107314	682413	4442.03
H6	2	307587	76090.6	71547.4	467786	2497.22
H7	2	373943	89547.5	85502.3	556668	2770.87
H8	2	552711	122518	112095	707331	4832.21
H9	2	560466	129589	108225	692836	5269.74
H10	2	478778	113868	93817.3	643546	4079.91
H11	2	10135.7	1395.7	365.875	1528.05	1187.91
H12	2	18568.9	2985.78	1611.87	3809.44	3415.3
A1	3	40849.6	4634.98	2836.66	3822.24	1439.57
A2	3	229180	44707.3	40435.3	337096	1799.62
A3	3	187427	43155.1	33794.8	279955	1299.64
A4	3	332048	71743.4	57363.4	423414	2537.16
A5	3	295324	63262.1	60228.1	435089	2188.82
A6	3	191401	42934.8	43206	319036	1053.19
A7	3	233237	52780.3	49276.9	353133	1918.39
A8	3	417077	89710.7	76169.6	525636	3584.12
A9	3	378491	83828.5	70403.9	504239	3053.8
A10	3	383479	84663.2	61400	434364	3028.38
A11	3	0	0	0	0	0
A12	3	0	190.078	127.754	451.549	610.778
B1	3	0	0	0	36.879	161.19
B2	3	285585	65816.1	52895.6	413080	2765.79
B3	3	183136	42387.5	39100.8	298988	1212.25
B4	3	338495	75303.3	64746	448865	9060
B5	3	306628	70588.3	83760	597290	3180.04
B6	3	199137	47307.1	60683.1	431538	2012.2
B7	3	242733	56655.3	69126.5	491524	2420.03
B8	3	433003	93354.4	81911.4	526209	3636.34
B9	3	357276	78894.7	68935.1	462886	2540.48
B10	3	368651	82310.8	66096.9	449265	3315.19
B11	3	0	0	69.5076	313.827	0
B12	3	0	207.675	0	0	251.901
C1	3	1448.06	731.051	588.308	658.165	346.651
C2	3	308165	74274.5	60893.3	449220	5232.58
C3	3	196366	46398.3	44107.8	316241	1897.24
C4	3	313272	73849.5	65887.5	436972	2898.03
C5	3	320589	70333.5	74366.1	481997	2652.08
C6	3	196954	44252	50542.8	331907	1587.44
C7	3	255652	58269.5	61407.8	394982	2641.5
C8	3	401845	87614	82805.4	511892	3691.53
C9	3	365307	87937.6	72578.3	458784	2519.28
C10	3	361931	82663.3	69114.7	457818	3019.35
C11	3	662.019	337.243	206.347	405.388	236.928
C12	3	0	0	0	192.584	64.805
D1	3	30052.6	6538.7	5260.72	6845.6	4181.6
D2	3	350462	80675.6	69394.7	493632	2177.89
D3	3	226674	52895.4	52439.4	359939	1807.88
D4	3	356135	78182.9	75252.2	472215	3191.9
D5	3	371439	81255.5	86629	528305	3265.78
D6	3	226190	50634.6	59635.4	370984	1714.77
D7	3	291366	65571.1	72282.5	433547	2787.04
D8	3	429657	95393	92992.8	555333	3365.95
D9	3	382906	87278.8	82276.4	503139	3430.85
D10	3	403129	94450.6	81855.7	526133	3028.35
D11	3	14514.8	4641.08	4355.76	6656.57	2817.85
D12	3	8265.82	979.306	684.106	1190.71	71.1691
E1	3	3927.68	1014.03	480.137	602.672	425.084
E2	3	351804	81612.2	74139	516849	2354.69
E3	3	243130	60365.7	58419	385429	2117.75
E4	3	413628	93724.1	94719.7	571196	3730.75
E5	3	423332	96808.9	93258.6	553492	3168.24
E6	3	265891	61343.2	63671.7	378700	2682.02
E7	3	317016	73063.1	74033.9	433363	2184.1
E8	3	518735	118583	113719	657210	4458.03
E9	3	428067	99795	91995.1	552711	3975.31
E10	3	425715	100445	85961.3	541230	3309.79
E11	3	17604.1	2581.47	1881.1	2554.36	1496.43
E12	3	4614.9	1151.42	918.965	2220.27	2526.04
F1	3	45666.9	8082.21	6128.46	6956.29	3802.46
F2	3	351124	88365.8	75593.4	522852	2939.82
F3	3	270117	66211.7	64867.7	423671	2022.32
F4	3	434429	99348.6	95163	578592	4157.01
F5	3	470660	106674	104745	636316	3557.27
F6	3	281244	68892.9	68416.7	411158	59071.6
F7	3	344273	81500.8	81415	482458	2756.06
F8	3	548384	126846	116262	672005	5149.21
F9	3	503002	118422	105785	637475	4024.92
F10	3	457549	108284	90388.6	579088	3706.03
F11	3	16982.5	2480.2	1841.94	2516.65	162.422
F12	3	0	0	0	0	354.963
G1	3	16763.1	4405.16	4987.36	10043.1	13759.4
G2	3	412866	98950.2	80845.8	573296	2729.83
G3	3	319855	76384	72234.8	498252	1913.04
G4	3	476865	111507	101174	633641	3738.22
G5	3	467461	108312	99431.7	613194	3659.39
G6	3	299316	70481.2	69794	433216	2280.41
G7	3	343836	81874.2	78880.9	486482	4638.65
G8	3	540242	122508	114177	684678	4610.85
G9	3	541507	127541	110955	681331	4670.71
G10	3	432741	102949	87675.5	579699	2438.83
G11	3	10417.3	2597.24	2442.9	3768.23	2440.49
G12	3	76927.2	14999.5	12527.8	16779.3	9656.11
H1	3	27138.7	4628.67	3876.98	5934.38	6484.74
H2	3	403359	99620.6	77759.1	572501	2617.01
H3	3	292405	72214.1	63721.3	457229	2647.2
H4	3	466460	105430	95047.4	624038	4176.37
H5	3	507042	121501	107074	678175	4251.63
H6	3	306569	76015.5	71313.1	465517	2491.86
H7	3	372423	89656.4	85244.6	553420	2612.37
H8	3	550304	122220	111824	706006	5046.5
H9	3	558021	128988	107740	690753	5363.96
H10	3	476073	113451	93136.9	640566	4233.03
H11	3	10324.8	1508.56	593.709	1509.34	1195.88
H12	3	18837.1	2965.39	1587.7	3728.7	3953.81
A1	4	40292.7	4753.15	2935.41	4040.31	1672.69
A2	4	228150	44609.9	40227.6	336476	1866.5
A3	4	186948	43176.9	34318.5	279503	1202.54
A4	4	331956	72025	57386.4	422808	2317.78
A5	4	295604	63563.1	60318.8	434923	2354.08
A6	4	191437	43247.9	43317.6	318906	1101.35
A7	4	233233	53019.2	49320.3	353116	1990.79
A8	4	416185	89604.3	76412.3	524858	3939.46
A9	4	378424	83969.4	70588.5	503847	3044.16
A10	4	382822	85205.5	61390	433903	2912.64
A11	4	0	0	0	0	0
A12	4	0	185.442	19.8729	458.604	780.745
B1	4	0	0	0	0	0
B2	4	284889	65720.2	53106.6	413248	2027.8
B3	4	183609	42818.2	39047.9	298993	1358.39
B4	4	338897	75445.1	64686.5	448939	9247.99
B5	4	307915	70805.4	83856.2	597618	3083.14
B6	4	199461	47775.2	60570.2	431517	2099.37
B7	4	243817	56972.3	69338.1	490614	2514.08
B8	4	433481	93519	81872.2	527120	3719.88
B9	4	357134	79143	69087.2	462523	2754.03
B10	4	369156	82585.3	66238.9	450122	3119.44
B11	4	0	49.0144	120.616	327.03	0
B12	4	0	0	0	0	0
C1	4	1638.98	620.875	481.122	943.783	570.377
C2	4	308158	74564.4	60973.1	449608	5060.62
C3	4	196462	46821.8	44219.5	316503	1718.38
C4	4	314881	74781.6	66237.4	437758	3050.4
C5	4	320817	70631.1	74558.3	482339	2834.68
C6	4	196803	44647.9	50574.1	331964	1844.38
C7	4	255950	58459.3	61439.7	394848	2631.65
C8	4	400792	87841.8	82906.5	512328	3716.27
C9	4	365402	88190.1	72829.9	458733	2730.88
C10	4	362523	82906.5	69103.5	457442	3136.71
C11	4	907.706	460.698	282.846	700.308	232.843
C12	4	0	0	0	673.494	0
D1	4	30126.3	6209.24	5019.59	6833.33	4500.8
D2	4	349970	80920.6	69511.5	494161	2230.23
D3	4	226235	53103	52455.5	360059	1840.44
D4	4	356345	78753.5	75489.3	472706	3156.37
D5	4	372099	81977.6	86835.3	529783	3216.34
D6	4	225965	50897.5	59912.2	370535	2048.7
D7	4	291708	66109.9	72428.2	433735	2781.15
D8	4	430416	96045.8	93424.1	556912	3278.98
D9	4	382980	87641.3	82202.6	503600	3565.75
D10	4	403432	94936	82012.4	526317	3031.87
D11	4	14733.2	4719.61	4265.91	6653.7	3230.03
D12	4	7921.64	959.977	574.649	1002.13	79.0768
E1	4	4347.74	941.601	574.569	721.837	0
E2	4	351520	82540.4	74164.6	516847	2782.81
E3	4	244249	61067.2	58635.2	385407	2227.73
E4	4	414658	94707.9	94995.8	572277	3423.31
E5	4	423479	97027.3	93397.7	553480	3481.5
E6	4	264963	61565.3	63726.2	378710	2810.95
E7	4	316705	73584.6	74103.7	433251	2228.99
E8	4	518626	118834	113901	658631	4379.69
E9	4	428086	100197	91904	552543	3728.34
E10	4	425884	100739	85888.5	543653	3521.59
E11	4	17651.6	2471.52	1871.99	2385.31	999.416
E12	4	4854.68	1132.87	803.784	2350.78	2509.79
F1	4	45339.1	8091.76	5889.55	6648.27	4057.54
F2	4	351164	88483.6	75668.9	522871	2863.75
F3	4	270353	66663.3	64898.6	424134	2077.6
F4	4	435053	99757.7	95371.8	580457	3884.54
F5	4	469858	106780	105106	637022	3411.51
F6	4	280603	69077.8	68348.5	411008	58951.1
F7	4	344125	82056.6	81559.4	482513	2670.95
F8	4	548635	127626	116484	673300	5713.92
F9	4	502806	118782	106145	637641	4042.18
F10	4	458034	108765	90848	579956	3335.11
F11	4	16810.5	2488.8	1715.27	2265.9	0
F12	4	0	0	0	0	287.065
G1	4	16285.6	4818.51	5109.76	10041.5	13366.6
G2	4	413482	99420.2	80721.1	573556	3050.05
G3	4	320001	76927.4	72373.4	498586	1665.54
G4	4	477819	112208	101157	633561	3695.78
G5	4	466877	108990	99607.1	612920	3538.5
G6	4	299092	70859.1	69825.9	433061	2496.13
G7	4	342946	82137	78976.9	487180	4803.05
G8	4	539755	122411	114293	685034	4461.21
G9	4	542173	127928	111239	681920	4530.71
G10	4	432125	103225	87894.9	580284	2635.25
G11	4	9984.1	2697.96	2528.58	3745.17	2846.63
G12	4	76839.4	15132.5	12234.3	17045.3	9864.63
H1	4	27282.6	5073.4	3723.34	5977.56	6715.79
H2	4	402328	99527.8	77698.5	571149	2765.84
H3	4	291520	72693.2	63646.8	456129	2406
H4	4	465502	105626	95010.8	625055	4133.1
H5	4	506051	121494	106843	676454	4090.67
H6	4	305678	76112.7	71082.5	463858	2282.72
H7	4	372011	89918.5	85163.8	552316	2806.63
H8	4	549867	122019	112013	705905	5146.69
H9	4	556915	129461	107733	689486	5180.88
H10	4	475005	113157	93123.3	639119	4171.29
H11	4	10094.7	1501.42	452.988	1597.57	1060.35
H12	4	18743.2	3252.95	1745.72	3838.8	3746.55
A1	5	40497.5	4932.05	2814.22	3669.29	1847.54
A2	5	227261	44186.8	40248.4	336420	1884.55
A3	5	186971	43346.9	34002.9	279363	1315.34
A4	5	331609	72397.2	57356.3	422646	2419.23
A5	5	295648	63639.3	60325.3	434508	2380.81
A6	5	191783	43701.6	43323.1	318440	1384.72
A7	5	233752	53562	49243.9	352665	1710.87
A8	5	416867	89982.7	76386.7	524727	3540.94
A9	5	377970	84576.8	70589.5	503216	3118.38
A10	5	382579	85308.7	61280.4	434151	3459.13
A11	5	0	0	0	0	0
A12	5	0	69.5407	0	650.513	638.415
B1	5	0	0	0	183.029	0
B2	5	285709	66059.1	53283.2	413245	2249.42
B3	5	183633	42947.4	39034.7	298602	1322.1
B4	5	339724	75928.5	64668.3	449120	9273
B5	5	307859	71062.1	84022.6	597596	3345.2
B6	5	199912	48072.6	60762.3	431819	2122.77
B7	5	244148	57261.6	69269.3	491077	2673.89
B8	5	433656	93633.6	81966.4	526418	3903.64
B9	5	357186	79028.3	69236	462729	2613.58
B10	5	369358	83078.7	66297.9	449467	3331.36
B11	5	0	63.6145	201.367	94.4527	0
B12	5	0	223.014	0	0	0
C1	5	1847.38	572.916	551.768	470.65	264.291
C2	5	308100	75047.2	61025.6	449850	5581.7
C3	5	196352	47143.8	44128.5	316406	1985.27
C4	5	314875	75157.1	66127.5	437569	2939.05
C5	5	320773	70881.9	74639.7	483338	2636.87
C6	5	196927	44976.3	50610.2	331746	1827.52
C7	5	256462	58898.7	61557.4	394948	2817.93
C8	5	401166	88139.6	82912.2	512920	3464.73
C9	5	365547	88367.1	72722.5	459142	2689.55
C10	5	362677	83187.8	69242	457727	2820.26
C11	5	958.077	292.077	229.498	506.735	261.437
C12	5	0	0	0	455.599	179.038
D1	5	30022.9	6463.43	5127.03	7012.51	4384.95
D2	5	350774	81318	69794.7	493985	2184.94
D3	5	226577	53771.4	52330.1	360174	2025.6
D4	5	357026	79061.4	75502.8	473118	3052.74
D5	5	372588	81971.2	86864.8	530525	3331.35
D6	5	225824	51209.9	59745.8	370679	1862.54
D7	5	292204	66577.4	72568.1	433918	2633.79
D8	5	430857	96187.5	93456.6	556924	3304.91
D9	5	383624	88031.1	82368.6	504335	3295.94
D10	5	403999	95455.7	82173.5	526638	3082.99
D11	5	14437.3	4624.39	4359.63	6754.04	2941.11
D12	5	8290.95	822.531	638.499	1238.1	346.949
E1	5	3807.46	735.242	649.05	653.352	46.4722
E2	5	352279	82767.1	74169.1	517276	2848.85
E3	5	245319	61903.6	58749.7	385886	1701.83
E4	5	415745	95257	94818	572559	3920.37
E5	5	423456	97427.7	93447.8	554369	3519.13
E6	5	265627	62043.5	63987	378776	2834.39
E7	5	316659	73804.7	74099.7	433715	2364.64
E8	5	519023	119608	113774	658649	4692.02
E9	5	428974	100800	92234.9	552734	3398.75
E10	5	426419	101372	86135.2	544695	3416.58
E11	5	17646	2655.71	1863.79	2403.89	1273.04
E12	5	5180.35	1282.98	981.113	2272.63	2457
F1	5	44929.3	8099.72	6128.46	6667.43	3907.76
F2	5	351446	89099.5	75797.4	524688	2859.07
F3	5	270495	67687.5	64941.1	424955	2405.09
F4	5	436122	100748	95645.4	581944	4004.84
F5	5	469490	107267	105485	639013	3513.33
F6	5	280503	69573.3	68402.7	410892	58963.4
F7	5	344392	82446	81597.1	483056	3080.25
F8	5	549814	127987	116933	675112	5447.76
F9	5	503040	119421	106065	637359	4110.13
F10	5	458768	108812	90865	580032	3302.07
F11	5	16682.3	2691	1658.17	2336.68	26.5595
F12	5	0	0	0	0	114.31
G1	5	16020.5	4606.07	4917.64	10382.6	13565.3
G2	5	413759	99509.6	80686.1	574048	2933.49
G3	5	320743	77316.7	72601.5	498428	1579.68
G4	5	478004	113546	101580	634574	4057.06
G5	5	467711	109214	99664.3	614803	3543.3
G6	5	298824	71140.1	69715.5	432851	2932.22
G7	5	343736	82887.3	79022.1	487550	4842.28
G8	5	540137	123060	114732	687304	4554.49
G9	5	542527	128381	111306	682074	4581.44
G10	5	431582	103441	87665.7	580518	2431.19
G11	5	10105.1	2697.96	2619.15	3769.44	2470.71
G12	5	76397	15115.3	12324.3	16829.3	9480.9
H1	5	27298.6	4808.09	3748.95	5955.11	6374.31
H2	5	402136	99804.8	77747.4	569813	2813.92
H3	5	291494	73095.2	63618	456052	2277.68
H4	5	465923	105723	95236.6	624145	4363.55
H5	5	505580	121865	106718	675390	4140.72
H6	5	305595	76506.7	71102	463526	2531.19
H7	5	371905	90622.8	84954.2	551445	2878.15
H8	5	549004	122451	111707	705514	5283.05
H9	5	557623	129730	107763	688800	5321.13
H10	5	474261	113077	92923.4	638680	4102.14
H11	5	10068.3	1244.28	524.018	1532.06	1222.46
H12	5	18808	3224.4	1593.27	3603.92	3801.47
A1	6	40403.7	5335.8	2989.27	3635.98	1633.35
A2	6	226312	43868.1	40166.4	335978	1939.76
A3	6	187654	43548	34120.6	279004	1177.04
A4	6	331956	72442.5	57349.2	422339	2268.35
A5	6	295990	63733.4	60342.4	434722	2397.01
A6	6	192319	43873.3	43265.8	318222	1076.47
A7	6	234513	53931.4	49299.4	352982	1956.2
A8	6	417589	90483	76233.4	524343	3438.82
A9	6	378676	84653.9	70729.1	503400	2973.79
A10	6	382299	85654.8	61300.3	433863	3425.92
A11	6	0	0	0	0	0
A12	6	0	384.792	70.9745	788.799	475.356
B1	6	0	0	0	36.879	0
B2	6	285550	66060.3	53178.8	413473	2578.53
B3	6	184425	43367	38875.1	298477	1129.87
B4	6	340008	76151.9	64727.9	449248	9176.42
B5	6	308567	71668	84204.1	597656	3057.86
B6	6	200581	48243.3	60892.8	431800	2182.5
B7	6	244782	57748.7	69280.5	490892	2563.78
B8	6	434220	94301.2	82008.7	525756	3808.18
B9	6	357423	79676.3	69100.4	463401	2857.53
B10	6	369996	83494.1	66159.4	449362	3273.89
B11	6	0	90.7288	0	35.5467	0
B12	6	0	61.3584	0	0	0
C1	6	1531.42	698.646	628.503	719.014	371.237
C2	6	308648	75449.3	61192.5	450427	5832.4
C3	6	197065	47215.5	44204.5	315951	1670.62
C4	6	316210	75934.4	66103.2	438224	3193.01
C5	6	321397	71277.2	74737.1	483212	3058.44
C6	6	197398	45342	50611	331857	1797.01
C7	6	256975	59273.5	61491.4	394117	2464.25
C8	6	401609	88119.9	82830.6	512710	3821.02
C9	6	365814	88614	72810.4	458988	2526.72
C10	6	363328	83839.4	69213.6	457994	3019.35
C11	6	731.922	407.502	207.353	616.19	722.017
C12	6	0	0	0	542.537	35.1485
D1	6	30448.1	6491.81	5119.87	6849.28	4343.05
D2	6	351666	81741.1	69722.6	493385	2140.66
D3	6	227856	54059.1	52602.8	359979	1835.35
D4	6	358493	79815.5	75583.1	473824	3517.6
D5	6	373081	82710.7	86943.4	530114	3402.99
D6	6	226329	51347.2	59952.1	370180	1802.09
D7	6	293252	67355	72497.2	434173	2863.67
D8	6	431990	97103.6	93404.9	558297	3595.09
D9	6	383181	88518.9	82330	504222	3469.63
D10	6	404798	95869.6	82438.1	527418	3086.52
D11	6	14804.6	4582.18	4360.6	6925.09	3000.82
D12	6	7867.01	996.486	660.795	998.185	645.464
E1	6	4019.61	910.169	610.479	487.617	184.522
E2	6	352467	82988.3	74277.4	516295	2906.92
E3	6	246493	62579.8	58746.5	386427	2344.23
E4	6	416247	95890.6	95196.8	573155	3198.91
E5	6	423695	97770	93419.7	554441	3190.61
E6	6	266244	62261.8	63847.9	378686	2751.37
E7	6	316884	74341.3	74166.6	433436	2610.58
E8	6	519304	120303	113960	658542	4356.29
E9	6	429109	100765	92192	552974	3539.22
E10	6	427230	102063	86277.1	544353	3421.97
E11	6	17555.7	2801.37	1792.74	2519.84	1099
E12	6	4762.53	1092.26	998.515	2342.72	2509.79
F1	6	45339.1	8134.75	5969.69	6646.79	3843.99
F2	6	352104	89589.1	75961.2	524702	2891.84
F3	6	271752	67638	65008.2	425085	2388.4
F4	6	436747	101003	95898.8	582262	3448.58
F5	6	469369	107484	105579	639136	3362.21
F6	6	280130	69901.7	68354.6	410431	58557.1
F7	6	344837	82514.6	81475.4	482546	3052.52
F8	6	550350	128610	117053	675500	5375.9
F9	6	503688	119817	106205	637734	3997.96
F10	6	458777	109561	90800.1	580418	3190.15
F11	6	16790.2	2473.74	1808.72	2244.66	181.831
F12	6	0	0	0	0	442.63
G1	6	16666.2	4247.07	4956.37	10306.6	13654.1
G2	6	414787	99948.9	81036.7	574124	3106.49
G3	6	321393	77836.1	72803.1	498760	1969.86
G4	6	479790	113909	101688	637008	3774.75
G5	6	467781	109623	99762.5	615635	3538.5
G6	6	299179	71338.4	69724.6	432535	2387.81
G7	6	343519	83130.2	79135.6	487356	4829.2
G8	6	540959	123655	114572	686557	4492.3
G9	6	542078	129185	111288	684639	4818.83
G10	6	431918	103888	87808	580376	2541.4
G11	6	10157.1	2543.68	2493.08	3689.34	2589.16
G12	6	76940.6	15325.6	12504.3	17122.7	9619.09
H1	6	27090.8	5046.68	3888.93	6271.17	6369.21
H2	6	402654	100123	77423.8	568634	2635.33
H3	6	292269	73102.8	63831.9	455209	2406
H4	6	466597	106092	95254.4	624794	4198
H5	6	506169	122064	106624	675664	4140.72
H6	6	305632	76861	70978.7	462185	2196.02
H7	6	371819	90639.2	84997.5	550539	2794.06
H8	6	549683	122625	111759	703532	5042.79
H9	6	558151	130019	107625	688272	5314.71
H10	6	474419	113629	92847.6	637468	4370.1
H11	6	10386.4	1487.13	562.884	1597.57	1652.98
H12	6	18913.1	3075.52	1782.91	4079.18	3282.44
A1	7	40664	5304.62	2739.41	3714.72	1385.65
A2	7	225179	43303	39993.6	334889	2022.58
A3	7	187594	43552.1	34095.2	278595	1333.97
A4	7	332376	73058.9	57311.2	422261	2169.5
A5	7	296338	63967	60171.8	434966	2198.54
A6	7	192322	43992.2	43254.6	318397	1421.64
A7	7	235064	54141.9	49312.2	352176	1839.57
A8	7	417762	90695.6	76126.6	523857	3450.45
A9	7	379126	85091.8	70596.1	503511	3044.16
A10	7	383119	86077.8	61347.2	433002	3462.15
A11	7	0	0	0	0	0
A12	7	0	244.165	70.9745	557.381	223.86
B1	7	0	0	0	1.36589	43.9609
B2	7	286308	66524.3	53247.6	413336	2425.61
B3	7	185011	43930.9	39059.1	298778	1387.82
B4	7	340770	77100.8	64731.3	448950	9503.25
B5	7	308543	71766.2	83932.2	597062	2998.88
B6	7	201073	48474.3	60792.7	431319	1998.47
B7	7	245490	58340.5	69365.1	491263	2687.65
B8	7	434707	94874.8	81853.3	524867	3632.37
B9	7	358502	79988.1	69190	463011	2545.41
B10	7	370504	83634	66297	449018	3196.67
B11	7	0	87.6002	88.9288	103.593	0
B12	7	0	333.932	0	0	0
C1	7	1644.36	531.438	590.745	761.236	642.903
C2	7	309154	75724	61063.4	449044	5974.32
C3	7	197550	47677.2	44190.4	315830	1737.11
C4	7	317058	76731.6	66339.4	438279	3120.73
C5	7	321594	71535.8	74677.2	482960	2767.55
C6	7	197519	45397.1	50750.6	331876	1890.95
C7	7	257316	59654.5	61478.6	394050	2848.29
C8	7	401447	88703.8	82949.7	513032	3785.55
C9	7	366410	88772.7	72759.1	459008	2492.01
C10	7	363535	84130	69300.5	457846	3085.42
C11	7	1053.68	600.213	269.761	613.149	601.51
C12	7	0	23.1516	0	369.761	0
D1	7	30220.6	6610.27	5044.66	6959.73	4469.99
D2	7	351841	82127.1	69809	493441	2631.79
D3	7	228339	54253.9	52704.1	360349	2161.93
D4	7	359234	80246.2	75776.7	473846	3323.17
D5	7	372990	82972.9	86987.6	529647	3353.55
D6	7	226814	51694.5	59701.1	369585	1811.68
D7	7	292663	67407.8	72610.9	434089	3045.41
D8	7	432520	97507.8	93503.3	557145	3369.3
D9	7	384454	88607.1	82454.9	504140	3544.67
D10	7	405231	96239.4	82371.7	526604	3077.7
D11	7	14722.2	4576.29	4381.85	6545.72	2880.44
D12	7	8053.85	1400.24	649.647	1123.57	0
E1	7	3755.13	815.872	506.738	530.078	354.009
E2	7	353896	83522.2	74324.2	516872	3008.26
E3	7	246877	63159.9	58841.7	385232	2237.53
E4	7	416603	96150.9	95133.9	572626	3351.5
E5	7	423883	98310.6	93571.9	554371	3175.35
E6	7	266161	62398.2	63911.1	378506	2573.61
E7	7	317114	74823.1	74323.9	433302	2487.61
E8	7	520014	120561	114066	658741	4523.14
E9	7	429713	101470	91993.3	552431	3742.11
E10	7	427651	102351	86368.5	545292	3452.48
E11	7	17796.1	2493.14	1923.92	2415.4	1181.54
E12	7	5261.77	1151.42	851.845	2581.18	2554.46
F1	7	44875.7	8279.65	6010.52	7137.57	4097.58
F2	7	352766	90288.8	75901.1	525102	2911.73
F3	7	271833	68147.5	65067.8	424856	2073.42
F4	7	437184	102005	95941.4	583237	3821.82
F5	7	469922	107713	105618	639080	3408.29
F6	7	280359	70156.6	68499.8	410317	58502.6
F7	7	344416	83151.7	81408.4	482312	2731.2
F8	7	551190	129283	116994	676392	5488.24
F9	7	504107	120047	106083	637682	4119.83
F10	7	459381	109646	91011.7	580514	3485.4
F11	7	16634.2	2553.33	1819.1	2403.41	0
F12	7	0	0	0	0	349.806
G1	7	16499.7	4909.08	4937.78	10500.4	13571.3
G2	7	415649	100660	81149	574162	3042.69
G3	7	322188	78202.6	72682.1	498544	1549.37
G4	7	480852	114606	101747	635892	3820.15
G5	7	468123	110090	99538.5	616322	3581.68
G6	7	298990	71889.7	69788.5	431239	2385.96
G7	7	344251	83403.8	78927.1	486927	4874.97
G8	7	541316	124083	114653	686422	4381.53
G9	7	542318	129403	111325	684572	4567.23
G10	7	432108	104106	87699.4	580072	2764.01
G11	7	10140.2	2583.21	2423.32	3959.98	2060.94
G12	7	77016.6	15206.8	12604.8	17029.1	9557.4
H1	7	27926.2	4872.99	3644.81	5956.84	6462.65
H2	7	402324	100613	77449.4	567396	2486.51
H3	7	292387	73593.3	63471.3	454995	2479.67
H4	7	466769	106286	95274.1	623868	4467.96
H5	7	504967	122250	106784	674585	4176.06
H6	7	305933	77156.9	70897.1	461648	2433.77
H7	7	371835	90958.1	84692.7	549493	2616.23
H8	7	549777	122867	111661	705093	5035.37
H9	7	558244	130654	107627	687750	5257.96
H10	7	473716	113803	92725.9	636770	3995.94
H11	7	10830.4	1464.27	566.905	1753.99	1255.68
H12	7	18980.1	3340.65	1383.19	3780.08	3610.15
A1	8	40554.9	5166.75	2959.35	3592.06	1009.74
A2	8	224915	43212.4	39838.4	335228	2202.01
A3	8	187243	43900.4	34052.6	279106	1031.87
A4	8	333112	73118.5	57220.1	422356	2254.48
A5	8	296831	64688.1	60224.9	434676	2149.94
A6	8	192491	44268.7	43425.9	318087	1204.1
A7	8	235178	54224.9	49317.1	352523	1817.04
A8	8	418380	91027.8	76419.8	523253	3675.44
A9	8	379675	85335.5	70621	503001	2970.9
A10	8	383005	86381.3	61199.6	432331	3390.7
A11	8	0	0	0	0	0
A12	8	0	156.08	100.784	571.491	348.226
B1	8	0	0	0	62.8309	0
B2	8	285963	66519.6	53183.4	413807	2537.53
B3	8	185038	43883.5	39057.1	298486	1090.64
B4	8	340717	77100.8	64881.5	448702	9487.73
B5	8	309688	72121.9	83981.2	597866	3145.5
B6	8	201349	48852.8	60770.3	431334	1926.64
B7	8	246023	58423.4	69571.5	489933	2394.03
B8	8	435417	95138.8	81974.2	525061	3802.61
B9	8	359126	80035.3	69143.1	462855	2778.67
B10	8	371138	84159.7	66122.8	449113	3270.3
B11	8	0	0	0	200.077	0
B12	8	0	102.657	0	0	0
C1	8	1613.44	701.239	535.933	666.857	500.309
C2	8	309966	76206.8	61256.5	450144	5782.67
C3	8	197576	47777.7	44155.7	315717	1793.3
C4	8	317705	77012.8	66335.5	437455	3158.82
C5	8	321746	71891.3	74722.8	482280	2858.84
C6	8	197974	45365.3	50674.4	331190	1910.22
C7	8	257327	60084	61493.8	394222	2762.95
C8	8	401736	88593.5	82840.4	513060	3851.53
C9	8	366918	89052.9	72754.2	458851	2535.82
C10	8	363926	84506.2	69211.1	457507	3155.84
C11	8	692.859	493.82	111.729	397.28	473.855
C12	8	0	0	0	483.111	28.5581
D1	8	30352.5	6531.3	5134.19	6871.37	4755.91
D2	8	352697	82515.2	69615	493007	2479.82
D3	8	228172	54557.4	52623.9	360205	2160.92
D4	8	359927	80741.3	75781.5	474423	3434.7
D5	8	374146	83450.3	87061.3	530169	3518
D6	8	227137	52108.2	59856.1	369707	1882.69
D7	8	293801	67672.6	72477.8	434172	2953.06
D8	8	433983	97906.3	93445.8	557940	3595.09
D9	8	384842	89102.4	82535.4	504157	3253.78
D10	8	405957	96563.3	82263.8	527185	2980.75
D11	8	14540.6	4616.54	4253.34	6848.64	2866.96
D12	8	8641.69	874.073	633.431	1106.79	165.073
E1	8	3705.62	666.911	551.958	461.592	632.842
E2	8	353538	83631.6	74383.4	516586	2976.38
E3	8	248294	63512.2	58879.2	386019	1812.89
E4	8	417717	96941.1	95178.1	573168	3886.71
E5	8	424445	98804.4	93575.9	554010	3295.37
E6	8	266575	62418.5	64036.7	378757	2506.21
E7	8	317344	74797.6	74115.5	433173	2003.56
E8	8	520170	121262	113915	658732	4561.8
E9	8	430427	101751	92054.4	552101	3482.3
E10	8	428457	102576	86227.5	544743	3566.46
E11	8	17739.2	2602.15	1949.42	2329.55	1382.5
E12	8	5096.25	1130.22	1022.55	2354	2938.65
F1	8	45252.4	8126.79	6022.61	7121.35	4131.69
F2	8	353516	90557.3	75766.7	525467	2761.93
F3	8	272164	68581.2	65068.8	424673	2067.17
F4	8	438828	102343	96037.6	583325	3969.88
F5	8	469991	107831	105729	639883	3920.61
F6	8	280721	70701.9	68454.3	410074	58778.7
F7	8	344706	83540.2	81509.4	482156	2720.68
F8	8	551264	129823	117186	677616	5489.25
F9	8	504851	120800	106258	637519	4146.79
F10	8	459991	110237	90910.7	580275	3219.99
F11	8	16897	2593.13	1586.52	2555.07	41.8823
F12	8	0	0	0	0	492.479
G1	8	16844.7	4293.18	4987.36	10036.9	13896.4
G2	8	416173	101149	81186.4	574388	2618.18
G3	8	322082	78302.5	72706.1	498567	1366.27
G4	8	481274	115640	101924	637408	3929.72
G5	8	468204	110581	99695.8	615373	3453.11
G6	8	299413	71933.3	69665.3	431646	2535.95
G7	8	344437	83834.7	79064.5	487252	4770.36
G8	8	542276	124132	114893	687434	4574.9
G9	8	543938	130015	111391	683929	4574.34
G10	8	432340	104290	87614.7	579656	2381
G11	8	10561.8	2673.74	2571.41	3716.04	2447.74
G12	8	77177.5	15188.2	12202.9	16664.4	9630.2
H1	8	27238.6	4935.98	3810.4	5680.5	6457.56
H2	8	403138	100904	77342.3	566499	2883.75
H3	8	292509	73655.2	63476.1	454687	2314.52
H4	8	467005	106999	95252.5	624529	4215.88
H5	8	505681	122660	106504	673482	4124.04
H6	8	305673	77263.8	70892.6	461218	2478.45
H7	8	372160	91351.2	84695.6	548468	2806.63
H8	8	549766	123080	111857	704803	4871.17
H9	8	557797	131171	107517	687062	5390.72
H10	8	474609	114389	92601.8	635571	4268.84
H11	8	10472.8	1351.42	422.163	1630.99	1055.04
H12	8	18700.8	3301.9	1647.19	3668.15	3611.93
A1	9	40566.4	5050.22	2784.3	3811.64	1678.52
A2	9	224435	42807.7	39966.3	334886	1698.75
A3	9	187829	43924.3	33924.7	278728	1230.98
A4	9	333485	73280.1	57321.8	422286	2037.7
A5	9	297502	64830.9	60307.3	434340	2438.33
A6	9	192764	44355	43421.9	318064	1138.28
A7	9	235671	54496.3	49452.1	352405	1678.7
A8	9	418603	91420.1	76238.4	523362	3340.86
A9	9	380380	85694.4	70615.3	502994	2661.47
A10	9	384035	86294.3	61291.3	432410	3173.31
A11	9	0	0	0	0	0
A12	9	0	333.796	0	681.556	169.968
B1	9	0	0	0	192.59	37.3002
B2	9	286616	66913.4	53043.5	412681	2322.56
B3	9	185178	43893.6	38958.4	299003	1019.04
B4	9	341258	77541.7	64845.3	448598	9431.67
B5	9	309783	72272.2	84024.3	597980	3233.97
B6	9	201892	48899.2	60808	430818	2250.3
B7	9	246938	58635.7	69359.8	490301	2459.03
B8	9	435856	95393.8	81842.4	524972	3898.07
B9	9	359154	80593	69240.1	463148	2694.9
B10	9	370808	84349	66183.6	449139	3484.01
B11	9	0	0	172.747	175.702	0
B12	9	0	0	0	0	0
C1	9	1866.21	677.907	481.122	639.537	604.796
C2	9	309969	76499.9	61306.9	449163	6193.94
C3	9	198235	48134.1	44258.9	315740	1960.92
C4	9	318251	77374.1	66237.4	437819	3044.54
C5	9	322396	72122.3	74733.6	482858	2889.28
C6	9	197916	45771.3	50546.8	331294	1725.54
C7	9	257808	60223.7	61510.5	394398	2515.13
C8	9	402218	88862.2	82758.9	513017	3790.5
C9	9	367726	89427.6	72911.4	458809	2606.9
C10	9	364552	84753.6	69308.3	458154	2958.49
C11	9	860.419	337.243	277.813	326.337	495.301
C12	9	0	0	0	432.489	139.496
D1	9	31025.9	6612.74	5094.8	7018.64	4631.43
D2	9	352790	82858	69499.3	492626	2169.84
D3	9	228266	54657.3	52615.9	359395	1826.2
D4	9	361218	81158.3	75918	474109	3173.15
D5	9	374217	83820	87077	530106	3765.18
D6	9	227322	52248.2	59857	369162	1902.84
D7	9	294346	67999.4	72322.4	433701	2768.38
D8	9	434584	98474.9	93504.2	558717	3650.28
D9	9	384967	89317.5	82446.5	503996	3698.13
D10	9	405705	97031	82344.3	526844	3270.72
D11	9	14635.9	4497.76	4449.49	6597.32	2598.27
D12	9	7966.44	901.992	731.74	1072.23	226.357
E1	9	4029.51	996.266	550.628	530.078	239.195
E2	9	353685	84146.5	74287.4	516697	2789.64
E3	9	248372	64032.2	58904.9	385178	2026.29
E4	9	418344	97250	95247.6	573027	3510.83
E5	9	425683	99286.9	93545.8	553187	3093.99
E6	9	266414	62797.1	63915	378259	2771.88
E7	9	317887	75301.1	74063.3	433177	2323.66
E8	9	520445	121804	114231	659157	4466.17
E9	9	430787	102224	92083.6	552356	3438.23
E10	9	428631	102787	86396.9	544962	3539.53
E11	9	17287.3	2853.06	1750.84	2424.25	1125.91
E12	9	4972.78	1338.61	995.2	2336.28	2361.15
F1	9	45655.9	8155.45	5824.53	7080.09	4199.91
F2	9	353250	91043.2	76017.8	525475	3007.7
F3	9	273154	68965.4	65099.7	424600	2054.65
F4	9	439230	102563	95997.1	583810	3774.52
F5	9	469439	108382	105398	639735	3576.56
F6	9	280126	70601.5	68339.8	409593	58716.3
F7	9	345090	83900.4	81601.9	481966	2893.77
F8	9	552504	130655	117075	675590	5090.51
F9	9	505605	121009	106069	637112	3978.55
F10	9	460692	110613	90975.6	580572	3535.49
F11	9	16939.8	2422.12	1731.88	2409.48	4.08608
F12	9	0	0	0	0	336.914
G1	9	16496.3	4515.5	5160.88	10033.8	13703.8
G2	9	417533	101555	81122.8	574026	3058.64
G3	9	322913	78483.2	72691	498550	1786.76
G4	9	482342	115882	101910	636892	3916.89
G5	9	468605	110911	99825.5	615438	3574
G6	9	299080	72214.3	69514.7	430997	2313.74
G7	9	344502	84122.6	79051.6	486939	5052.45
G8	9	542842	124924	114839	688298	4614.74
G9	9	544298	130221	111395	684273	4622.02
G10	9	432678	104842	87627.7	579427	2340.62
G11	9	10587.8	2562.81	2445.35	3958.76	2549.27
G12	9	76885.5	15512.9	12337.3	16845.5	9762.22
H1	9	27194.7	5092.49	3982.83	6141.64	6389.6
H2	9	402895	100728	77220.1	566154	2298.76
H3	9	292700	74358.1	63586.7	454778	2030.55
H4	9	467010	107323	95137.3	624628	4444.45
H5	9	504909	123004	106352	673039	4079.88
H6	9	305840	77856.6	70796.8	460603	2489.18
H7	9	372388	91590.2	84520.6	547932	3317.89
H8	9	550253	123134	111753	703519	4914.77
H9	9	559086	131163	107451	686530	5275.09
H10	9	474189	114179	92559.5	634790	4114.49
H11	9	10298.4	1812.84	466.39	1630.99	1452.33
H12	9	18825.9	3369.2	1714.12	3198.39	3445.41
A1	10	40734.8	4748.22	3068.56	3798.01	1359.43
A2	10	223608	42593.3	39951	334216	2069.29
A3	10	188091	44131.6	34051.6	278352	1399.69
A4	10	333106	73641.7	57472.1	421782	2051.58
A5	10	297856	65162.6	60398.8	434106	2321.67
A6	10	192970	44473.8	43308.8	317880	1308.46
A7	10	236195	54546.1	49371.7	351821	1589.41
A8	10	419278	91671.5	76254.1	523226	3765.94
A9	10	380902	85777.2	70514.8	501975	3200.32
A10	10	383662	86660.6	61052.1	431765	3196.45
A11	10	0	0	0	0	0
A12	10	0	250.347	25.5508	440.26	780.745
B1	10	0	0	0	84.6852	321.048
B2	10	286750	66884.2	53041.3	412535	2432.26
B3	10	185054	44356.6	38992	298213	1311.31
B4	10	341649	77826.2	64869.4	448603	9430.81
B5	10	309832	72656.8	83968.5	598510	3271.05
B6	10	202273	49297	60755.1	430808	2134.07
B7	10	246951	59261.7	69235.7	490215	2584.43
B8	10	436113	95567.5	81832.9	525335	3611.68
B9	10	359580	80542.5	69254.9	462847	2841.1
B10	10	371314	84427.9	66237.1	449014	3416.66
B11	10	0	25.0286	166.614	274.217	0
B12	10	0	0	0	0	0
C1	10	1907.89	705.127	667.48	771.17	753.536
C2	10	310486	76681.9	61131.6	448620	6839.34
C3	10	198578	47777.7	44217.6	315167	1834.5
C4	10	319382	78076.9	66536.7	437640	3158.82
C5	10	322316	72410.3	74955.3	483220	2942.09
C6	10	197895	45911.8	50463.3	330768	1756.86
C7	10	258317	60353.4	61437.3	393468	2638.22
C8	10	401854	89045.8	82859.2	512635	3905.14
C9	10	367731	89757.8	72848.7	459113	2486.22
C10	10	364646	85023.8	69341	457603	2908.94
C11	10	662.019	497.835	374.444	337.486	277.777
C12	10	0	0	0	509.522	0
D1	10	30084.9	6468.37	5007.66	7000.23	4551.33
D2	10	353468	82597.6	69531.8	492738	2342.95
D3	10	228626	54450.6	52593.8	359181	1701.06
D4	10	360988	81321	75782.5	473806	3265.92
D5	10	375335	83903.8	87007.3	530037	3479.66
D6	10	227575	52464.5	59667.8	368818	2047.74
D7	10	294316	68351.2	72427.3	433636	2871.53
D8	10	435080	99127.7	93632.6	557874	3332.5
D9	10	385654	89623.2	82356	503786	3573.34
D10	10	406443	96848.3	82426.6	526673	3075.94
D11	10	14560.4	4727.46	4343.2	6684.28	3248.32
D12	10	8349.96	1192.99	833.089	1001.15	393.407
E1	10	3818.77	852.771	474.817	632.806	716.219
E2	10	354935	84067.2	74248.3	515793	2910.34
E3	10	249239	64311.8	58853.5	385248	2111.22
E4	10	418666	97389.6	95287.4	572641	3481.66
E5	10	425466	99729.2	93526.8	553262	3344.19
E6	10	266392	62941.8	63856.6	378037	3038.52
E7	10	317333	75271.8	73895.2	432716	2087.48
E8	10	521258	122151	113997	658684	4390.88
E9	10	430800	102524	92254.9	552003	3748.54
E10	10	428975	103213	86265.6	544592	3445.3
E11	10	17495.1	2669.81	1795.47	2611	1273.04
E12	10	4958.47	1138.17	878.362	2331.44	2604.01
F1	10	45410	8131.57	5881.99	7264.31	4342.28
F2	10	354518	91028.6	76032	525470	2943.33
F3	10	272921	68834.9	65074.1	424754	2267.42
F4	10	439653	103154	96049.8	584029	4100.46
F5	10	469945	108090	105459	640032	3352.56
F6	10	280120	71024.4	68354.6	409218	58564.2
F7	10	344790	83920.5	81563.2	481728	2728.33
F8	10	552502	130928	117313	676576	5336.43
F9	10	505743	121189	106002	637264	4352.79
F10	10	460486	110581	91035.1	580567	3364.95
F11	10	17066.9	2470.52	1702.81	2521.71	134.841
F12	10	0	0	0	0	323.163
G1	10	16620.4	4736.17	5088.07	10052.4	13806.1
G2	10	418128	102449	81242.6	573323	2657.44
G3	10	323362	79198.5	72770.4	498491	1937.03
G4	10	483148	116769	101868	636844	3652.34
G5	10	468957	111093	99840.7	614576	3544.26
G6	10	299179	72582.4	69539.3	430879	2544.28
G7	10	344554	84254.9	79037.8	487398	4770.36
G8	10	542362	125061	114708	687820	4498.13
G9	10	544341	130445	111405	684137	4702.16
G10	10	432836	105202	87631	578674	2511.94
G11	10	10413.4	2729.84	2446.58	3957.55	2616.97
G12	10	77152.2	15005.2	12163.8	17055.3	9614.16
H1	10	27072.8	4684.02	3817.23	5905.02	6391.3
H2	10	402113	100595	77294.6	565348	2686.85
H3	10	293511	74418.7	63538.6	454170	2398.88
H4	10	467709	107404	95048.3	624184	4184.84
H5	10	504936	122873	106365	671403	4164.28
H6	10	305896	77920.2	70881.1	460287	2213.9
H7	10	371723	91540.1	84516.8	547155	3044.38
H8	10	550215	123326	111720	704744	4972.28
H9	10	558910	131214	107496	687427	5153.04
H10	10	474472	114885	92451.5	635144	4129.31
H11	10	9936.43	1565.7	501.235	1505.33	1059.02
H12	10	18680.7	3254.99	1669.5	3813.11	3153.13
A1	11	40231.5	5224.19	2965.33	3885.85	1454.14
A2	11	222993	42473	39917.1	333747	1769.89
A3	11	187908	44133.7	33849.6	278306	1409.5
A4	11	333489	73668.3	57251.1	422156	2503.34
A5	11	297639	65289.1	60299.2	434252	2415.64
A6	11	193114	44486.3	43343.1	317559	1338.16
A7	11	235840	54791.4	49247.9	351885	2047.09
A8	11	419076	91944.4	76203.6	522174	3666.31
A9	11	381605	86367.5	70644.9	502193	3139.59
A10	11	383348	86801.2	61125.8	431235	3058.57
A11	11	0	0	0	0	0
A12	11	0	231.802	44.0042	622.291	0
B1	11	0	0	0	0	0
B2	11	286771	66909.9	52934.6	412541	2342.5
B3	11	185441	44550.3	39009.3	298425	1174
B4	11	342138	77764.2	64805.6	448248	9561.89
B5	11	310347	72809.5	83864.7	597313	3211.22
B6	11	202412	49504.1	60838.4	430331	2160.71
B7	11	247352	59466.7	69558	490685	2685.36
B8	11	435547	95684.3	81825.1	523658	3852.73
B9	11	359816	80962.6	69409.5	463074	2674.36
B10	11	371731	84762.5	66155.9	448536	3397.8
B11	11	0	0	29.6429	4.06248	0
B12	11	0	129.797	0	0	79.4888
C1	11	1700.83	558.658	602.925	711.563	132.76
C2	11	310301	76823.6	61399.3	448710	6280.96
C3	11	198043	48240.3	44329.3	315017	1664.07
C4	11	319769	78212.8	66463.8	437751	3271.15
C5	11	322926	72390.4	74780	482461	3033.38
C6	11	198129	46089.6	50525.9	330706	2017.82
C7	11	257914	60641.1	61312.3	393450	2510.21
C8	11	401771	89245.1	83008.4	512384	3595.04
C9	11	367736	89714.1	72762.4	458798	2733.36
C10	11	364644	85064.5	69340.1	457125	2921.11
C11	11	724.726	484.787	223.459	306.068	557.597
C12	11	0	0	0	379.666	366.862
D1	11	30468.8	6574.49	5119.87	6746.19	4578.44
D2	11	353349	83094.8	69242.4	492244	2295.64
D3	11	228964	55138.7	52632.9	359271	1724.46
D4	11	361893	81762.5	75895.7	474047	3304.42
D5	11	374814	84345.3	86882.5	529857	3491.77
D6	11	227710	52692.5	59687.7	369285	2001.68
D7	11	294623	68555.8	72479.7	433909	2630.84
D8	11	435150	99112.3	93661	557152	3618.51
D9	11	385229	89914.1	82450.7	503453	3521.07
D10	11	406720	97248.1	82292.1	527042	3072.41
D11	11	14602.1	4787.34	4349.97	6711.04	3028.75
D12	11	8190.43	1020.11	616.202	941.907	317.296
E1	11	3854.13	803.573	509.398	857.438	110.713
E2	11	354169	84649.2	74009.5	515100	2527.76
E3	11	249715	64463.7	58782.9	384812	2197.24
E4	11	419703	97640.3	95186.9	573098	3551.23
E5	11	424716	99974.3	93468.8	553379	3017.71
E6	11	266341	63354.6	63894.6	377771	2996.52
E7	11	317328	75391.8	74035.8	432586	2668.15
E8	11	521874	122562	113810	658777	4622.84
E9	11	430929	102776	91988.8	551249	3820.15
E10	11	428970	103547	86281.6	544453	3392.35
E11	11	17782.1	2576.78	1892.94	2464.08	1052.35
E12	11	5115.93	1051.64	984.428	2411.2	2422.07
F1	11	45302.8	7532.89	5922.82	6901.76	3714.97
F2	11	354804	91472	76048.5	525598	2852.05
F3	11	273677	69431.7	64943.2	424512	2320.61
F4	11	440269	103312	96182.6	583880	3685.07
F5	11	469183	108136	105482	640198	3346.13
F6	11	279760	70931.6	68405.3	408900	58474.5
F7	11	344748	84201.2	81509.4	481767	2862.21
F8	11	553350	131296	117069	677357	5471.03
F9	11	505631	121748	105979	637022	3994.73
F10	11	460199	110936	90795.8	579737	3141.12
F11	11	16570.1	2291.98	1803.53	2613.72	36.7747
F12	11	0	0	0	0	332.617
G1	11	16652.7	4815.21	5106.66	10692.6	13627
G2	11	418098	102203	81139	573221	2702.84
G3	11	324080	79337.6	72857.3	498570	1948.39
G4	11	483668	117050	102068	636710	3849.77
G5	11	469130	111272	99705.3	614966	3652.68
G6	11	299045	72393	69566.7	430582	2237.82
G7	11	344609	84651.7	79149.4	486735	4966.51
G8	11	542720	125297	114713	686974	4487.44
G9	11	544262	130675	111240	684513	4461.73
G10	11	432999	105405	87447.4	579472	2384.27
G11	11	10194.9	2548.78	2576.31	3703.91	2477.96
G12	11	76723.2	14776.3	12325.6	16940.4	9880.67
H1	11	27340.6	5207.02	3605.54	5815.21	6224.81
H2	11	402520	101007	77090.8	564644	2856.28
H3	11	293164	74709.5	63610.7	453871	2509.37
H4	11	467226	107648	95290.9	625097	4342.86
H5	11	505388	123261	106172	671229	4272.24
H6	11	306206	78190.5	70608.7	459754	2387.29
H7	11	372246	91891.8	84443.7	546925	2887.81
H8	11	549553	123765	111874	704908	4981.56
H9	11	558586	131435	107470	687759	5242.97
H10	11	474841	114980	92616.7	634025	4025.58
H11	11	10405.4	1277.13	521.338	1862.27	1391.21
H12	11	18884	3004.14	1701.1	3807.6	3424.15
A1	12	41021.9	4840.13	2790.28	4038.8	1427.91
A2	12	222579	42360.6	39697.4	333077	2431.34
A3	12	188005	44288.1	33947.1	277759	1085.82
A4	12	332871	73808.7	57294.4	421448	2303.04
A5	12	298547	65624.1	60314.7	433490	2341.12
A6	12	193598	44880.2	43229.1	317710	1385.52
A7	12	235829	54972.6	49142.6	351510	1621.59
A8	12	419682	92016.9	76296.4	522272	3622.31
A9	12	382309	86763.5	70704.3	502387	3063.44
A10	12	382963	86696	61153.8	430901	3289.05
A11	12	0	0	0	0	0
A12	12	0	66.4501	0	692.845	330.262
B1	12	0	0	0	0	119.894
B2	12	287102	67304.9	52974.8	412429	2537.53
B3	12	185833	44512	38976.7	298170	1126.93
B4	12	342615	78147.3	64815.1	448401	9460.13
B5	12	310713	73299.8	84040.3	597329	3091.57
B6	12	202723	49710.3	60683.1	430140	2354.42
B7	12	248279	59693.5	69433.1	490173	2527.08
B8	12	436245	95850.5	81751.3	524083	3758.86
B9	12	360374	81146.6	69170.2	462565	2515.84
B10	12	371725	84786.8	66235.4	448056	3404.09
B11	12	0	52.143	28.6208	6.09372	0
B12	12	0	97.9375	0	63.482	157.858
C1	12	1585.2	732.347	356.883	894.11	442.534
C2	12	311075	77239.9	61343.7	448975	6485.05
C3	12	198375	48524.1	44185.7	314823	1917.85
C4	12	320037	78689.2	66461.9	437393	2856.03
C5	12	322418	72632.6	74714.8	482360	2779.18
C6	12	198113	46213.8	50553.2	331131	1633.2
C7	12	258199	60810.3	61446	393398	2596.37
C8	12	401874	89077.3	82790.7	512221	3442.46
C9	12	368845	89957	72739.6	458314	2639.96
C10	12	364841	85311.9	69238.6	457742	3014.13
C11	12	646.599	512.891	204.334	765.17	552.491
C12	12	0	0	0	393.972	0
D1	12	30316.3	6319.06	5080.47	6997.78	4803.97
D2	12	354421	83387.1	69359.2	491810	1911.19
D3	12	228982	54959.8	52617.9	359679	2041.88
D4	12	362650	81972.4	75746.7	474192	3200.78
D5	12	375820	84684.7	87026.9	529993	3507.91
D6	12	227967	52642.2	59890.3	368687	1953.7
D7	12	294620	68671.5	72463.2	433487	2779.18
D8	12	435704	99547.3	93867.1	557557	3251.39
D9	12	385728	90063.2	82439	503180	3393.75
D10	12	406878	97639	82306.2	526561	2860.01
D11	12	14832.4	4536.05	4374.12	6744.48	2926.67
D12	12	8094.28	1179.03	608.094	1198.61	283.688
E1	12	3705.62	1082.36	513.388	795.802	505.727
E2	12	355272	84483.9	74209.3	514566	2814.69
E3	12	250094	65105	58653.4	384539	1996.9
E4	12	420050	97861.4	95204.6	572540	3620.79
E5	12	425059	100070	93507.8	552678	3470.31
E6	12	266849	63574.8	63750.5	377419	2650.77
E7	12	317495	75833.9	74002.4	432205	2505.18
E8	12	521748	122579	113860	658640	4373.59
E9	12	431822	102946	91936.8	551072	3564.01
E10	12	429498	103534	86365	543602	3473.12
E11	12	17956.3	2652.89	1899.32	2682.7	1327.77
E12	12	4962.04	1100.2	875.047	2262.97	2512.23
F1	12	45499.8	8063.1	6086.12	7149.36	4016.02
F2	12	355005	91930	76199.4	526057	2988.97
F3	12	273707	69608.6	65115.6	424610	2484.35
F4	12	441111	103584	96316.3	584442	3789.95
F5	12	469034	108209	105413	639440	3559.41
F6	12	279918	71404.3	68288.2	408725	58298.6
F7	12	344687	84512.9	81374.4	481501	2740.76
F8	12	554016	131571	117114	677130	5392.1
F9	12	506133	121558	106049	637205	4386.22
F10	12	460785	111208	91012.8	579841	3279.68
F11	12	16951.5	2473.74	1717.35	2544.96	0
F12	12	0	0	0	0	458.96
G1	12	16494.6	4349.17	4961.02	10579.4	13416.3
G2	12	419140	102702	81025.5	573268	3110.17
G3	12	324291	79544.8	72885	498379	1890.31
G4	12	484294	117466	102132	638108	3840.88
G5	12	468903	111684	99580.4	615446	3417.61
G6	12	298929	72505.1	69525.6	429810	2336.89
G7	12	344477	84481.6	79099.6	486609	4951.57
G8	12	544263	125719	114809	687429	4659.44
G9	12	544658	130579	111318	683753	4908.1
G10	12	433518	105727	87342.1	579166	2589.42
G11	12	10012.7	2755.34	2586.1	3735.46	2638.72
G12	12	77123.9	15008	12178.2	16991.6	9591.95
H1	12	27612.4	4905.44	3709.68	5924.02	6714.09
H2	12	402599	101455	77055.9	564341	2810.48
H3	12	293943	74991.4	63626.4	454167	2590.17
H4	12	468158	107918	95050.2	622634	4208.35
H5	12	505088	123260	106138	669056	4257.52
H6	12	305965	78490	70647.8	459184	2316.68
H7	12	371981	92269.5	84490.8	546511	3091.74
H8	12	550073	123882	111823	704054	5052.99
H9	12	558539	131485	107540	686559	5348.97
H10	12	474063	115006	92300	633460	4078.68
H11	12	10522.6	1454.27	603.09	1427.79	1658.29
H12	12	18452.7	3222.36	1682.51	3882.84	3450.73
A1	13	40637.2	4913.99	2968.32	3720.78	1136.5
A2	13	222136	41840.2	39753.1	333361	1976.92
A3	13	188013	44279.8	33932.9	277876	1134.86
A4	13	334297	73827.3	57349.2	421131	2310.84
A5	13	298091	65477.3	60402.9	433831	2435.9
A6	13	193601	45114	43302.4	317332	1296.42
A7	13	236400	55100.7	49297.8	351249	1788.09
A8	13	420192	92052.4	76073.6	521882	3765.11
A9	13	382457	86804.4	70509.1	501890	2900.53
A10	13	383725	86864	61165.7	430632	3182.36
A11	13	0	0	0	0	0
A12	13	0	86.5396	0	620.88	497.466
B1	13	0	0	0	157.077	0
B2	13	286975	66941.5	53261.4	411847	2359.12
B3	13	185888	44551.3	38939.1	297808	1266.2
B4	13	343085	78116.8	64866	448074	9533.43
B5	13	311514	73498.8	83928.8	597893	3114.32
B6	13	203114	49911.2	60758.3	430078	2251.92
B7	13	248229	60035.2	69194.5	490222	2407.8
B8	13	436231	96039.4	81772.5	524601	3762.04
B9	13	361268	81314.3	69288.6	462273	2379.49
B10	13	372101	84715	66199.6	448020	3331.36
B11	13	0	0	121.638	77.1871	0
B12	13	0	0	0	0	0
C1	13	1534.11	395.338	492.084	464.441	503.997
C2	13	311610	77630.1	61256.5	448913	7004.06
C3	13	198521	48551.1	44297.4	314439	1855.1
C4	13	320520	79162.8	66524.1	437724	3032.82
C5	13	322599	72983.8	74732.7	482318	2704.89
C6	13	198482	46255.7	50538.7	330565	1735.98
C7	13	258594	60913.5	61310.7	393419	2539.75
C8	13	401407	89125.4	82789.9	511911	3773.18
C9	13	368504	89944.3	72728.2	457700	2501.1
C10	13	364920	85446.6	69388.3	456986	2939.36
C11	13	524.27	457.687	127.834	469.237	731.208
C12	13	0	0	0	300.431	466.816
D1	13	30662.7	6628.78	5098.38	6981.83	4153.26
D2	13	353945	83709.3	69537.9	491584	2219.16
D3	13	229536	55223.8	52461.5	358115	2054.09
D4	13	362752	82250.4	75848.3	473406	3317.25
D5	13	375886	84863.1	86983.7	529927	3497.82
D6	13	227930	52869.3	59480.4	368601	2131.22
D7	13	295214	68752.9	72324.3	433080	3016.92
D8	13	436520	99625.9	93602.6	557347	3735.58
D9	13	386055	90071.5	82410.5	503375	3484.81
D10	13	406660	97553.4	82211.5	526944	3115.6
D11	13	14611.1	4600.83	4494.9	6838.13	3094.24
D12	13	8174.04	1030.85	692.214	1065.32	176.934
E1	13	3859.79	900.603	384.376	761.559	419.617
E2	13	354591	84879.3	74204.8	515297	2998.01
E3	13	250439	65210.5	58850.3	384561	2116.67
E4	13	420579	98182	95298.4	572328	3517.56
E5	13	425476	99927.5	93283.6	552212	3021.77
E6	13	266447	63814.3	63866.3	376716	2527.7
E7	13	317466	75842.4	74030.9	431797	2308.04
E8	13	522437	122788	113889	658507	4476.34
E9	13	432207	103184	92170.2	550750	3743.03
E10	13	429639	103746	86340.1	545438	3590.69
E11	13	17975.9	2703.64	1905.7	2225.11	1192.3
E12	13	4731.21	1133.76	952.939	2378.17	2454.56
F1	13	45315.4	8300.35	6223.72	6975.45	3869.2
F2	13	355547	92029.6	76272.5	526637	2960.88
F3	13	273961	69681.2	65053.9	424432	2264.29
F4	13	440966	103728	96057.9	584048	4097.38
F5	13	469436	107963	105653	639868	3302.18
F6	13	279786	71432.1	68188.5	408045	58409.4
F7	13	344479	84368.5	81357.4	481484	2631.74
F8	13	554114	131532	117065	677535	5539.85
F9	13	506599	121974	106017	636143	4264.35
F10	13	461092	111353	90802.2	580097	3729.48
F11	13	17045.5	2501.71	1721.5	2449.92	64.3558
F12	13	0	0	0	0	382.466
G1	13	16792	4599.48	5030.74	10677.1	13608.9
G2	13	420009	102969	81277.5	573116	2922.45
G3	13	323900	79517	72736.3	498502	1813.28
G4	13	485154	117903	102011	637898	4108.39
G5	13	469488	111834	99693.9	614640	3503
G6	13	299121	72874.1	69552.1	430032	2485.95
G7	13	344694	84670.6	78913.2	485884	4970.25
G8	13	543580	125882	114924	689426	4682.76
G9	13	544941	130980	111523	684630	4565.21
G10	13	433015	105488	87541.9	578513	2652.71
G11	13	10460.3	2868.82	2568.97	4057.06	2597.63
G12	13	77207.3	15192.5	12287.7	16721.9	10048.5
H1	13	27082.8	5126.85	3740.41	5958.56	6316.55
H2	13	403066	101042	77021	564394	2813.92
H3	13	294829	75009.1	63543.4	454046	2382.24
H4	13	468161	108023	95258.1	623172	4356.03
H5	13	505021	123362	106300	671081	4016.08
H6	13	306230	78790.4	70771.1	459315	2501.69
H7	13	372314	92290.7	84487.9	546083	2759.27
H8	13	550551	123974	111691	703301	5114.22
H9	13	558624	131765	107416	685268	5165.89
H10	13	474897	115585	92409.3	633218	4328.11
H11	13	10192.9	1321.42	637.935	1558.8	1257.01
H12	13	18879.5	3234.6	1688.09	3668.15	3195.64
A1	14	40822.8	5089.61	2923.44	4097.86	1669.78
A2	14	221686	41497.4	39730.2	332872	2013.02
A3	14	187948	44418.7	33989.7	277981	1248.64
A4	14	333595	73937.5	57303.2	420796	2130.48
A5	14	298386	65762	60318	433559	2107.01
A6	14	194048	45064.3	43297.7	317404	1363.04
A7	14	236276	54918.8	49245.5	350841	2018.13
A8	14	419748	92158.7	76073.6	521599	3515.21
A9	14	382595	86868.2	70730.1	501618	2943.91
A10	14	383015	86766.8	61112.9	430038	3073.67
A11	14	0	0	0	0	0
A12	14	211.357	38.6337	55.3601	613.824	606.632
B1	14	0	0	0	185.761	390.32
B2	14	286275	67264	53163.9	411847	2384.61
B3	14	186041	44915.5	38942.2	297430	1319.16
B4	14	342701	78245.9	64717.5	447482	9388.56
B5	14	312062	73541.7	83890	596917	3215.43
B6	14	203566	49925.8	60627.8	430149	2198.64
B7	14	248398	60063.6	69257.4	489744	2598.19
B8	14	435653	96109.2	81720.7	523453	3773.18
B9	14	361024	81399	69380.7	461962	2653.83
B10	14	371625	84753.6	65994.2	447914	3494.78
B11	14	0	9.38574	161.503	358.514	0
B12	14	0	156.936	0	0	0
C1	14	1625.54	583.286	579.782	546.401	400.739
C2	14	310813	77320.6	61280.7	448182	6797.9
C3	14	198996	48680.5	44127.6	314296	1960.92
C4	14	320876	79195.8	66402.6	437529	3057.24
C5	14	322402	72488.1	74725.5	481854	2975.2
C6	14	198474	46342.7	50555.6	330852	1669.34
C7	14	259231	60895.3	61325.9	393486	2832.7
C8	14	401077	88808.6	82952.1	511512	3663.49
C9	14	368493	90445.2	72715.9	458050	2351.5
C10	14	364839	85455.1	69282.5	456772	2958.49
C11	14	671.271	524.935	345.254	487.479	633.169
C12	14	0	0	0	545.838	41.7388
D1	14	30568.3	6242.55	5252.37	6855.42	4600.62
D2	14	353901	83490.1	69431.3	490879	2262.43
D3	14	229238	55220.8	52502.6	358339	2042.9
D4	14	362518	82409.4	75760.2	474408	3152.42
D5	14	375492	84844.8	86838.3	529505	3527.08
D6	14	228417	52843.3	59803.8	368270	1768.5
D7	14	294578	69151.9	72472.9	432610	2813.56
D8	14	436562	99585.4	93706.1	557944	3454.6
D9	14	385368	90197.5	82276.4	503219	3476.38
D10	14	406825	97947	82333.7	526168	3240.75
D11	14	14982.4	4452.61	4470.75	6852.46	2725.39
D12	14	8452.66	971.789	782.414	1300.31	61.2845
E1	14	4059.21	623.179	521.368	472.55	228.261
E2	14	354637	84531.9	73988.3	513784	2958.16
E3	14	250619	65612.4	58842.8	383996	2167.84
E4	14	420266	98303.6	95200.1	572282	3315.6
E5	14	425258	100047	93331.6	552024	3420.47
E6	14	266645	63658.6	63644.4	376947	2450.54
E7	14	317481	75653.5	74003.4	431635	2280.72
E8	14	521910	122816	113933	658356	4483.46
E9	14	431979	103198	91850.2	550092	3844.94
E10	14	429530	103643	86134.3	544238	3229.92
E11	14	17664.7	2524.15	1839.2	2501.25	1193.2
E12	14	4631.9	1254.73	1019.23	2528.82	2566.65
F1	14	45837.1	8367.22	6007.49	6916.5	3820.26
F2	14	355854	92176.6	76319.6	526659	2932.8
F3	14	273683	69767.5	65091.2	424214	2096.37
F4	14	441659	103923	96315.3	584068	3884.54
F5	14	467689	108247	105435	639451	3574.42
F6	14	279993	71610.3	68225.2	407890	58241.5
F7	14	344759	84619.8	81304.5	480930	2884.21
F8	14	553857	132096	116993	677094	5579.32
F9	14	505827	121994	105944	635776	4261.11
F10	14	461253	111420	90768.2	579076	3279.68
F11	14	16873.5	2693.15	1604.17	2491.38	200.218
F12	14	0	0	0	0	252.686
G1	14	17028.2	4405.16	5033.84	10337.6	13968.6
G2	14	419745	103005	81077.9	573395	2482
G3	14	324308	80138.8	72880	498362	1603.67
G4	14	484982	118038	102006	637168	3776.72
G5	14	469043	111821	99462.2	613730	3216.12
G6	14	299108	72933.7	69532	429380	2521.13
G7	14	344210	84988.2	79027.6	485976	4785.3
G8	14	544010	125866	114886	688654	4704.14
G9	14	544503	130895	111240	683757	4699.12
G10	14	433060	105727	87609.2	577588	2342.81
G11	14	10620.3	2507.98	2559.17	3910.22	2544.44
G12	14	77022.6	15329.8	12435.2	16859.2	9801.7
H1	14	27494.5	4752.74	3936.73	5934.38	6175.54
H2	14	403111	101741	76912.7	564065	2965.03
H3	14	294527	74886.5	63456.9	453664	2511.75
H4	14	467889	108273	95109.2	623184	4498.06
H5	14	504862	123420	106134	669369	4232.98
H6	14	306203	78608.4	70848.3	458873	2311.32
H7	14	371490	92371.6	84406.2	545500	2796.96
H8	14	549882	123898	111654	703594	5280.27
H9	14	557178	131578	107226	684985	5169.1
H10	14	474357	115325	92103.9	632559	3904.56
H11	14	10834.8	1467.13	475.771	1371.64	1116.16
H12	14	19342.1	3520.13	1468.71	3725.03	3631.41
A1	15	40220	4876.24	3073.05	3858.59	1650.84
A2	15	221032	41506.6	39702.8	332773	1780.5
A3	15	187955	44410.4	34061.7	277932	1087.78
A4	15	333148	73878.8	57366.9	420773	2221.53
A5	15	298509	65882.1	60305.7	433651	2422.93
A6	15	193879	45382.8	43263.4	317522	1152.73
A7	15	236593	55387.9	49113.7	351198	1683.52
A8	15	419783	92299.6	76226	521410	3666.31
A9	15	382854	87099.6	70526.3	501770	3068.26
A10	15	382546	86828.6	61036.1	429755	3177.33
A11	15	0	0	0	0	0
A12	15	0	275.072	144.788	708.367	339.935
B1	15	0	0	0	61.465	0
B2	15	286481	67286.2	52972.5	411882	2192.91
B3	15	185815	44868.1	39126.2	297973	1148.5
B4	15	342660	78291.8	64872.9	447212	9351.48
B5	15	312128	73763.7	83909.4	597039	3228.92
B6	15	203576	50046.3	60782.3	430042	2364.91
B7	15	248719	60115.9	69165.4	490036	2429.21
B8	15	435554	96025.8	81581	522708	3656.23
B9	15	360966	81507.2	69192.4	462121	2775.39
B10	15	371270	84971.6	65926.3	447692	3450.78
B11	15	0	50.0573	1.02217	0	48.2389
B12	15	0	116.817	0	0	0
C1	15	1618.81	539.215	403.168	733.916	261.832
C2	15	310887	77699.8	61154.7	448130	6933.61
C3	15	199056	48951.3	44259.9	314177	1988.08
C4	15	320939	79646.8	66548.4	437472	2996.68
C5	15	322341	72854.9	74694.2	481917	2806.93
C6	15	198638	46345	50533.9	330430	1962.41
C7	15	259046	61215.5	61544.7	393714	2456.87
C8	15	400687	88920.5	82818.4	512141	3854.83
C9	15	368082	90090.4	72614.2	457620	2693.68
C10	15	365629	85463.6	69216.2	456901	2844.6
C11	15	875.839	406.499	247.616	379.038	539.215
C12	15	0	0	0	434.69	43.9356
D1	15	30329.2	6342.5	5303.7	7018.64	4649.92
D2	15	354046	83884.4	69311.5	491078	2230.23
D3	15	229135	55341.4	52652	358017	1897.41
D4	15	362698	82246.8	75751.5	473601	3344.88
D5	15	375889	85118	86983.7	529311	3756.1
D6	15	228266	53071.2	59586	368123	2086.12
D7	15	294513	69284.3	72319.4	432765	2726.13
D8	15	436604	100124	93686.9	557781	3566.66
D9	15	385905	90265.1	82395.4	502957	3445.18
D10	15	406686	97868.5	82252.2	526162	3156.14
D11	15	14583.3	4669.55	4411.81	6902.15	2932.45
D12	15	8184.97	935.28	686.133	1067.3	195.715
E1	15	4025.27	962.1	546.638	667.049	524.863
E2	15	354637	84590	74135.6	513595	2926.28
E3	15	251115	65380.3	58721.9	384120	2327.9
E4	15	420805	98470.8	95154.9	572099	3754.31
E5	15	425324	100469	93283.6	551988	3262.82
E6	15	266780	63589.5	63893.6	376985	2645.88
E7	15	317069	75848.1	73978.8	431861	2166.53
E8	15	522098	122975	114109	658635	4463.11
E9	15	432497	103243	91851.1	550295	3634.7
E10	15	429832	103962	86320.6	544297	3675.05
E11	15	17698.2	2429.24	1871.99	2525.15	1258.69
E12	15	4853.79	1161.13	914.822	2407.98	2479.74
F1	15	45238.2	8309.9	6194.99	6969.55	3975.98
F2	15	356634	92569	76314.9	527612	3015.89
F3	15	274096	70070.7	65044.3	424222	2067.17
F4	15	441632	104266	96278.8	583902	3913.33
F5	15	467626	108367	105369	639754	3506.9
F6	15	279465	71691.3	68207.7	407764	58018.1
F7	15	344260	84696.6	81304.5	481035	2888.03
F8	15	553818	132295	117218	678250	5613.73
F9	15	505783	121884	105915	635402	4187.78
F10	15	460338	111563	90736.3	579162	2878.92
F11	15	17152.4	2456.53	1692.43	2499.46	0
F12	15	0	0	0	0	440.911
G1	15	16781.8	4508.91	5267.79	10306.6	13320
G2	15	419834	103425	81076.6	572648	2726.15
G3	15	324609	80159	72708.6	497688	1852.42
G4	15	485360	118622	101980	637823	3948.48
G5	15	468814	111997	99554.7	614824	3723.68
G6	15	298645	73150.6	69394.2	429695	2314.67
G7	15	344421	85146.5	78895.7	486299	4847.89
G8	15	543854	126228	115049	689027	4586.56
G9	15	543659	130739	111259	684418	4808.68
G10	15	433005	105812	87442	577729	2398.46
G11	15	9994.51	2731.11	2546.94	3810.7	2509.39
G12	15	77037.5	15344.2	12330.8	17086.5	9736.31
H1	15	27158.7	4615.31	3781.38	5820.39	6474.55
H2	15	402466	101752	76962.8	563462	2976.48
H3	15	293968	75561.5	63585.5	453449	2541.45
H4	15	467746	108370	95059.5	623999	4348.5
H5	15	504103	123385	106115	670510	4115.21
H6	15	306234	79098.7	70629.1	458345	2288.08
H7	15	371648	92457.4	84362	545296	3279.23
H8	15	550156	124075	111719	704104	5032.58
H9	15	557114	131611	107198	684836	5453.89
H10	15	474944	115730	92203.2	632842	4650.41
H11	15	10464	1217.13	556.183	1633.67	748.092
H12	15	18866.1	3157.1	1663.92	3868.16	3227.53
A1	16	40440.1	5168.39	3055.1	3794.99	1652.29
A2	16	221072	41174.1	39712.7	333089	1755.02
A3	16	187457	44458.1	33910.5	277451	1004.4
A4	16	333483	74234.1	57370.4	420595	2555.37
A5	16	299057	66026.5	60309.8	433605	2463.44
A6	16	194070	45252.3	43258.6	317081	1343.78
A7	16	236446	55391.1	49296.2	351004	1755.91
A8	16	419768	92241.9	75929.4	520933	3607.36
A9	16	382860	87467	70764.5	501191	2813.78
A10	16	382407	86756.7	60881.6	428852	3285.02
A11	16	0	0	0	0	0
A12	16	0	208.622	79.4914	1236.11	321.971
B1	16	0	0	0	249.958	0
B2	16	287266	67172.9	52920.9	411430	2212.86
B3	16	185697	44874.1	39014.3	297535	1264.24
B4	16	342980	78564.4	64659.7	447158	9712.81
B5	16	312238	74073.3	83806.4	595907	3169.09
B6	16	204013	50367.7	60649.4	429589	1966.19
B7	16	249123	60194.4	69227.4	488926	2537.02
B8	16	434462	96088	81677.6	522421	3797.84
B9	16	361133	81627.7	69382.4	462559	2728.57
B10	16	371472	84970.7	66138	447416	3340.34
B11	16	0	43.8001	146.17	2.03124	9.23724
B12	16	0	202.955	0	124.737	0
C1	16	1634.95	709.016	552.986	624.635	409.344
C2	16	310644	77354.3	61122.2	447730	6882.85
C3	16	199046	48933.7	44009.3	314461	1982.46
C4	16	321057	79860	66627.1	437673	2972.26
C5	16	321926	72905	74787.2	482218	2917.92
C6	16	198610	46293	50371	330464	1695.83
C7	16	259290	61036.4	61364.1	393331	2702.23
C8	16	400532	88776.3	82718.9	511497	3680.81
C9	16	368916	90350	72690.7	457384	2817.66
C10	16	364612	85759.3	69261.8	456473	2948.93
C11	16	880.979	524.935	172.123	781.385	356.413
C12	16	0	0	0	235.503	0
D1	16	30218.1	6463.43	5068.54	6814.92	4562.42
D2	16	354214	83688.8	69249.5	490260	2019.89
D3	16	228871	55293	52481.5	358332	2148.71
D4	16	362996	82389.4	75797	473862	3297.51
D5	16	375818	85532.8	86918.9	529150	3778.29
D6	16	227692	53160.1	59546.1	368430	2140.82
D7	16	294607	69432.5	72430.2	432421	2618.07
D8	16	436294	100124	93700.2	557704	3247.21
D9	16	385393	90370.6	82314.1	502486	3581.77
D10	16	407021	97940	82208	526467	3029.23
D11	16	14907.9	4560.59	4549.01	6639.37	2926.67
D12	16	8390.38	1108.16	635.458	1048.54	343.984
E1	16	3872.52	1085.1	542.648	804.02	215.959
E2	16	354794	84963	74169.1	512957	2720.19
E3	16	251227	66027.9	58728.3	383666	2063.31
E4	16	421006	98701.4	94956.1	571325	4042.67
E5	16	424994	100589	93176.5	551794	3293.34
E6	16	266601	64043.7	63765.1	376708	2750.39
E7	16	316987	75648.7	73969	431198	2404.66
E8	16	521593	122965	113888	657135	4324.75
E9	16	431761	103496	91910.4	549915	3666.83
E10	16	429755	104023	85900.1	543228	3447.1
E11	16	17503.5	2715.86	1909.34	2310.96	1148.34
E12	16	5024.67	1014.55	906.535	2440.2	2280.74
F1	16	45712.6	8061.51	5934.91	6736.69	4016.02
F2	16	357064	92498.5	76156.9	526808	3019.4
F3	16	274491	70327.5	65106.1	423764	2086.98
F4	16	441694	104103	96422.7	584468	3533.92
F5	16	466665	108020	105524	639824	3435.09
F6	16	279371	71780.8	68160.5	407911	58519.3
F7	16	344200	84681.1	81300.8	481081	2909.07
F8	16	553872	132332	116953	676344	5666.36
F9	16	505735	122174	105734	635052	4347.39
F10	16	461198	111420	90482.2	579566	3352.16
F11	16	17133.1	2779.2	1664.4	2473.18	0
F12	16	0	0	0	0	323.163
G1	16	16786.9	4696.65	5120.6	10481.8	13709.8
G2	16	420044	103710	81145.3	572704	3058.64
G3	16	325220	80075.6	72609.1	498163	1540.53
G4	16	485739	118619	102093	637022	3974.15
G5	16	468952	111998	99462.2	615386	3366.76
G6	16	298848	73175.5	69353.1	429235	2631.31
G7	16	344310	85391.2	78897.5	485609	5058.99
G8	16	544257	126079	114628	688245	4691.51
G9	16	544448	130872	111300	683032	4565.21
G10	16	432742	105702	87217.2	577350	2266.42
G11	16	10219.6	2787.22	2625.27	4094.69	2381.26
G12	16	77036	15135.3	12383	16590.8	9781.96
H1	16	27054.8	4750.83	3791.62	6317.81	6044.72
H2	16	402699	101536	77030.3	562993	3145.91
H3	16	294574	75842.1	63601.1	453343	2564.03
H4	16	467923	108299	94989.3	621857	4314.64
H5	16	503740	123494	106013	668306	4199.61
H6	16	305562	79052.8	70624.7	458354	2630.4
H7	16	371236	92507.5	84200.5	544839	2967.06
H8	16	550000	123908	111541	703742	4935.18
H9	16	556887	131741	107298	684894	5308.28
H10	16	473980	115850	92085.2	631927	4019.4
H11	16	10496.3	1711.41	399.38	1911.74	1028.46
H12	16	19313	2539.14	1513.33	3673.65	3953.81
A1	17	40537.7	5043.65	2969.82	3743.5	1605.67
A2	17	220203	40909.3	39749.8	332266	1670.09
A3	17	187995	44504.8	33932.9	277134	1193.71
A4	17	333136	74179.1	57171.5	420730	2425.3
A5	17	298592	66018.4	60233	433252	2458.58
A6	17	193989	45491.6	43226.8	317175	1294.01
A7	17	236844	55310.4	49231	350767	1953.79
A8	17	419707	92271.6	76008.1	520274	3657.18
A9	17	383217	87870.7	70627.7	501241	2785.82
A10	17	381894	86930.8	60935.4	428976	2906.6
A11	17	0	0	0	0	0
A12	17	0	114.356	93.6863	589.836	418.701
B1	17	0	0	0	0	0
B2	17	286447	67325.9	53151.3	411412	2458.85
B3	17	186063	44877.2	38989.9	297390	1030.81
B4	17	342276	78170.3	64634.7	447307	9596.39
B5	17	312426	74283.7	83907.7	595560	3106.74
B6	17	204072	50437.2	60782.3	429621	2101.79
B7	17	249486	60570.3	69314.9	490060	2452.15
B8	17	435245	95859.6	81611.6	522737	3922.73
B9	17	361050	81804.4	69320.7	461996	2705.57
B10	17	371569	85203.9	66163	447200	3328.66
B11	17	0	256.544	0	104.609	0
B12	17	0	17.6996	0	0	0
C1	17	1457.47	646.799	535.933	916.463	488.016
C2	17	310435	77383.8	61289.1	447265	6867.31
C3	17	199188	48923.4	44233.6	314372	1619.12
C4	17	321155	80242.1	66560	437715	3253.56
C5	17	322391	72888.6	74690.6	481370	2959.09
C6	17	198453	46643.9	50510.7	329957	1718.32
C7	17	259347	61331.6	61380.8	392987	2730.13
C8	17	400083	88837	82625.2	511680	3838.34
C9	17	368434	90425.4	72713.5	457214	2755.67
C10	17	366026	85925.3	69104.4	455974	2890.68
C11	17	696.97	277.021	288.886	286.812	186.887
C12	17	0	0	0	156.268	0
D1	17	30505	6574.49	5115.09	7023.55	4589.53
D2	17	354111	83863.8	69416	490401	2333.89
D3	17	229174	55635.1	52420.4	358217	2226.03
D4	17	363593	82451.2	75600.6	472870	3265.92
D5	17	375541	85519.9	87145.8	528752	3439.31
D6	17	227873	53445.5	59480.4	367998	1669.67
D7	17	295029	69326	72282.5	432345	2981.55
D8	17	436910	100187	93595.9	557601	3368.46
D9	17	385649	90258.5	82288.9	502286	3633.21
D10	17	406764	98095.3	82266.4	526156	2871.46
D11	17	14957.5	4378.01	4513.26	6602.1	3099.05
D12	17	8379.46	970.715	671.944	990.286	535.745
E1	17	3984.25	948.434	539.988	0	147.618
E2	17	355077	84757.5	73986.1	512974	3042.42
E3	17	252181	66196.7	58627.7	383653	1670.25
E4	17	421472	98874.9	94928.5	571600	3858.66
E5	17	425364	100397	93341.7	550958	3263.84
E6	17	267380	64076.9	63574.4	376842	2623.42
E7	17	316604	75919.9	73763.5	431086	2150.92
E8	17	521920	122816	113931	658418	4285.08
E9	17	431899	103237	91843.8	549481	3545.64
E10	17	429517	103900	86205.3	542448	3563.77
E11	17	17781.2	2580.53	1950.33	2634.9	1255.1
E12	17	5081.04	1260.02	928.08	2403.95	2378.21
F1	17	45460.4	8429.32	5927.35	7066.82	4312.62
F2	17	357625	93000.2	76194.7	527529	3022.91
F3	17	274601	70304.4	65012.4	423768	1948.27
F4	17	442336	104740	96345.7	584220	3818.73
F5	17	466713	107444	105287	639605	3649.44
F6	17	279179	72070.3	68160.5	407155	58076.1
F7	17	344462	84888.6	81269.6	480133	2815.35
F8	17	554374	132654	117303	677424	5378.94
F9	17	504919	122067	105693	634658	4173.76
F10	17	460537	111464	90951.1	579211	3301
F11	17	16777.4	2540.43	1582.37	2517.66	0
F12	17	0	0	0	0	222.604
G1	17	16515	4942.02	4940.88	10705	13426.8
G2	17	420623	103919	81046.7	572150	2996.07
G3	17	324843	80418.1	72905.2	497561	1646.6
G4	17	486010	118867	102128	637364	3896.16
G5	17	469338	112149	99713.9	614434	3283.28
G6	17	298829	73291.1	69291	429031	2531.32
G7	17	344100	85407.4	78880.9	485771	4637.72
G8	17	543086	126107	114946	689366	4415.54
G9	17	543848	131056	111311	682413	4646.36
G10	17	432694	106106	87312.8	577373	2749.82
G11	17	10116.8	2604.89	2518.79	3765.8	2786.19
G12	17	76957	15321.3	12217.3	16911.7	9864.63
H1	17	27392.5	4334.73	3817.23	5991.38	6150.05
H2	17	402811	101951	76846.4	562525	2454.45
H3	17	294888	75538.8	63782.6	454030	2369.17
H4	17	467171	108333	95060.5	622489	4132.16
H5	17	504188	122905	105849	669320	4308.55
H6	17	305796	79282.5	70787.1	457840	2440.92
H7	17	371667	92644.3	84202.4	544188	2779.57
H8	17	549619	123880	111522	703527	4951.88
H9	17	557046	131480	107279	685426	5218.35
H10	17	473960	115847	92136.1	631643	4151.53
H11	17	9871.94	1411.42	529.379	1655.06	1021.82
H12	17	18763.3	3252.95	1509.61	3904.86	3216.9
A1	18	41098.4	4933.69	3049.11	4061.51	1331.74
A2	18	219819	40907	39559.6	332095	1898.36
A3	18	188222	44583.6	34123.7	277166	1119.16
A4	18	332793	74124.9	57268.8	420163	2227.6
A5	18	299376	66239.8	60156.3	433104	2325.73
A6	18	193850	45539.7	43263.4	316931	1437.7
A7	18	236650	55424.3	49219.8	350399	1904.72
A8	18	419088	92161.2	75994	520484	3632.27
A9	18	383441	87463.2	70494.7	500608	2979.58
A10	18	381831	86785.1	60847.7	428617	3161.23
A11	18	0	0	0	0	0
A12	18	0	329.16	96.5253	801.499	391.064
B1	18	0	0	0	158.443	13.3215
B2	18	286555	67080.5	52896.8	411037	2295.96
B3	18	186088	44987.1	39047.9	297404	1001.38
B4	18	343195	78454	64657.1	446796	9707.63
B5	18	312910	74453.8	83984.6	595720	3116.85
B6	18	204664	50766.3	60623	429559	2180.08
B7	18	249718	60525.9	69255.9	488819	2459.79
B8	18	434942	96002.2	81571.6	522568	3754.08
B9	18	361283	81731.9	69262.3	461722	2745.82
B10	18	372050	84885.4	65923.6	447256	3158.05
B11	18	0	162.686	134.926	230.546	0
B12	18	0	101.477	0	0	41.4237
C1	18	2008.73	705.127	585.872	306.73	427.782
C2	18	310964	77844.8	61040.3	447684	7495.1
C3	18	199520	49112.4	44089.1	313869	1600.39
C4	18	321655	80230.8	66541.6	437711	3133.42
C5	18	321962	72853.2	74564.6	481728	2678.04
C6	18	198466	46669.5	50434.4	330003	1625.98
C7	18	259016	61437.1	61286.9	393006	2884.4
C8	18	399517	88660.5	82732	511317	3696.48
C9	18	368754	90433.3	72611.7	456946	2588.71
C10	18	365488	85876.2	69088	456681	3274.07
C11	18	902.566	237.877	248.623	657.742	274.714
C12	18	0	68.2972	0	398.374	0
D1	18	30842.3	6491.81	5000.49	6865.24	4691.82
D2	18	354602	83737.1	69345	489244	2250.36
D3	18	229312	55569.8	52490.6	357255	2269.77
D4	18	363121	82652	75780.6	473582	3411.01
D5	18	375671	85552.1	86975.8	528886	3383.82
D6	18	228069	53423	59559.4	367735	2015.11
D7	18	294750	69367.6	72295.1	432716	2499.2
D8	18	437139	100096	93586.8	556408	3845.13
D9	18	385062	90236.3	82160.7	502185	3480.59
D10	18	406358	98175.6	82154	525897	2971.94
D11	18	14661.7	4561.57	4296.82	6872.53	3224.25
D12	18	8190.43	964.272	674.984	889.579	82.0422
E1	18	4223.28	992.166	494.767	546.514	567.234
E2	18	354438	84695	74019.5	512401	2861.38
E3	18	251620	66314.9	58572	383199	2163.49
E4	18	421497	98846.3	94724.1	571076	3762.17
E5	18	424769	100739	93208.5	551104	3485.57
E6	18	266677	64039.1	63529.6	376600	2636.12
E7	18	316507	75805.5	73790	430878	2361.72
E8	18	521131	123066	113860	656913	4366.47
E9	18	431735	103380	91855.7	548969	3514.43
E10	18	429057	103993	86161.8	543184	3496.46
E11	18	17833.3	2672.63	2006.81	2279.1	1285.6
E12	18	4970.1	1054.29	989.4	2248.47	2457
F1	18	45417.9	7953.24	5993.88	6695.43	4173.22
F2	18	357577	93023.3	76260.7	527864	2733.84
F3	18	274836	70397	65059.2	423203	2173.55
F4	18	442188	104713	96150.1	584451	3640.86
F5	18	465279	107326	105361	639259	3923.82
F6	18	278764	71909.9	68087.9	406592	58110.4
F7	18	343723	84615.3	81207.3	480222	2875.6
F8	18	554038	132521	117270	677398	5595.51
F9	18	505018	121883	105603	634644	3938.65
F10	18	460373	111583	90655.5	578841	3370.28
F11	18	17248.5	2550.11	1802.49	2569.23	0
F12	18	0	0	0	0	493.339
G1	18	16443.6	4591.25	5075.67	10501.9	13574.3
G2	18	420978	104032	81021.7	572314	2823.07
G3	18	325052	80368.8	72789.3	498537	1789.29
G4	18	486195	118966	102006	637453	3738.22
G5	18	468602	111916	99390.7	615270	3354.28
G6	18	298533	73163.1	69218.9	428615	2695.2
G7	18	344125	85096.1	78833.9	485706	4831.07
G8	18	543598	126462	114799	689366	4529.23
G9	18	543363	130887	111316	682869	4649.41
G10	18	432222	106086	87206.3	576348	2551.23
G11	18	10211.8	2658.44	2605.68	3805.85	2481.58
G12	18	77085.1	15291.2	12426	16896.7	9668.45
H1	18	27496.5	5060.04	3796.75	6098.46	6002.25
H2	18	402355	102002	76969.8	562623	3106.99
H3	18	294563	75777.7	63663.6	453326	2201.64
H4	18	467844	108462	95100.8	623774	4466.08
H5	18	502828	122779	105875	669347	4154.46
H6	18	305852	79345.2	70629.1	457637	2285.4
H7	18	371390	92754.1	84219.7	544034	3018.29
H8	18	548128	124101	111496	701840	5263.57
H9	18	556147	131458	107158	683502	5169.1
H10	18	474101	116393	91912.6	630819	4035.46
H11	18	10582.7	1318.56	519.998	1721.9	1373.94
H12	18	18886.2	3485.45	1524.49	3802.1	3587.13
A1	19	40780.7	5007.55	3034.15	3900.99	1911.65
A2	19	219741	40566.5	39649.2	331802	2178.65
A3	19	188218	44466.4	33984.6	277089	1251.58
A4	19	333453	74029.8	57160.9	419956	2186.85
A5	19	299042	66130.3	60358	432718	2198.54
A6	19	194049	45349.4	43390.1	316608	1199.28
A7	19	236518	55297.7	49101.6	350703	1924.83
A8	19	420029	92354	76033	519754	3650.53
A9	19	383898	87699.3	70574.1	500445	2996.93
A10	19	381722	86704.1	60617.4	428123	3286.03
A11	19	0	0	0	0	0
A12	19	0	432.698	52.5211	873.465	323.353
B1	19	0	0	0	0	0
B2	19	286575	66915.8	52974.8	410647	2267.15
B3	19	186044	45083.9	38891.3	297204	1255.41
B4	19	342393	78337.6	64690.8	446598	9734.37
B5	19	313294	74536.3	84068.2	596543	3371.32
B6	19	204277	50902.3	60620.6	429689	2143.76
B7	19	249617	60729.5	69169.1	488221	2522.49
B8	19	434999	96012.9	81415.5	522029	3569.52
B9	19	361149	81597.6	69230.3	461690	2652.18
B10	19	371518	84861.2	66043.3	446791	3216.42
B11	19	0	6.25716	139.015	184.843	0
B12	19	0	0	0	0	0
C1	19	1790.91	467.925	643.12	864.307	480.641
C2	19	311522	77972.3	61170.4	447478	7485.77
C3	19	199505	49198.9	43967.1	313707	1795.17
C4	19	321157	80241.1	66393.8	437132	2840.4
C5	19	322178	72956.9	74643.3	481658	3028.01
C6	19	198373	46512.7	50379.8	329808	1893.36
C7	19	259518	61283.8	61462.7	393125	2554.52
C8	19	399065	88251.5	82551.8	511551	3727
C9	19	368505	90449.2	72435.9	456784	2516.81
C10	19	365758	85740.6	69204.2	456405	3041.08
C11	19	930.322	622.294	240.57	505.722	572.916
C12	19	0	52.0911	0	409.379	0
D1	19	30324	6293.15	4984.97	6860.33	4349.21
D2	19	355258	83896.7	69139.9	489439	2497.93
D3	19	230344	55446.2	52543.7	357626	2267.74
D4	19	363359	82598.4	75838.6	473608	3305.4
D5	19	375944	85381.9	86825.5	529514	3431.24
D6	19	228422	53519.1	59446.2	367820	2030.47
D7	19	294972	69412.1	72450.6	432149	2587.62
D8	19	436799	100283	93582.6	557207	3416.13
D9	19	385084	90231.3	82227.8	502126	3411.45
D10	19	406457	98299.1	82291.2	525726	3053.91
D11	19	14942.6	4678.38	4460.12	6517.06	2874.67
D12	19	7804.73	1042.66	563.5	1114.69	344.973
E1	19	3685.82	1139.76	520.038	695.813	303.436
E2	19	354998	84622.4	73794.1	512096	3120.98
E3	19	252640	66574.3	58550.6	382586	2024.12
E4	19	421545	98622	95199	571249	3501.86
E5	19	424936	100342	92976.3	551452	3252.65
E6	19	267406	64080.6	63703.8	376474	2768.95
E7	19	316289	75686.5	73767.4	430926	2577.39
E8	19	520983	122785	113575	655528	4519.07
E9	19	431979	103406	91667	548648	3966.13
E10	19	428750	103978	86095.3	544759	3773.77
E11	19	17439.2	2606.85	1904.79	2495.94	1302.65
E12	19	4959.36	1104.62	909.85	2276.66	2534.16
F1	19	45384.8	8462.76	6060.42	6969.55	3793.56
F2	19	357639	93340.4	76273.6	528128	3319
F3	19	275038	70478.1	64982.6	423346	2108.89
F4	19	442622	104663	96168.4	584633	3812.57
F5	19	464773	107284	105224	638890	3389
F6	19	278800	72039.1	68159.6	406828	58426.1
F7	19	344294	84875.8	81318.7	480040	3020
F8	19	554456	132423	117210	677611	5376.92
F9	19	505827	121860	105701	634350	4288.08
F10	19	460772	111679	90833.1	579408	3412.92
F11	19	16732.5	2440.4	1695.54	2596.53	0
F12	19	0	0	0	0	391.921
G1	19	16792	4471.04	4897.5	10402.7	13645.1
G2	19	420697	104090	81011.8	572161	2826.75
G3	19	325212	80669.6	72712.4	498026	2097.39
G4	19	486703	119333	102066	637992	3886.29
G5	19	468252	111921	99515.6	614871	3461.74
G6	19	298668	73305.4	69246.3	428581	2624.83
G7	19	343968	85351.6	78928	485294	5136.52
G8	19	543912	126266	114791	688784	4479.67
G9	19	543680	130658	110973	682041	4497.23
G10	19	432382	105982	87192.2	576854	2643.98
G11	19	10347.1	2472.28	2611.8	3586.19	2382.47
G12	19	76898.9	14956.5	12461.3	16794.3	9791.83
H1	19	27070.8	4960.79	3767.72	6136.46	5956.38
H2	19	402437	101813	76873.1	562304	3089.81
H3	19	295007	76443.9	63654	453407	2552.15
H4	19	467699	108501	95103.6	622749	4500.89
H5	19	503140	122618	105680	667564	4073
H6	19	306708	79395.5	70514.7	457383	2229.09
H7	19	371533	92678	84173.5	543851	2692.59
H8	19	548790	124015	111576	702956	4960.22
H9	19	555629	131463	107025	684543	5255.82
H10	19	474155	115793	91988.4	630906	4409.61
H11	19	10206.1	1741.41	497.214	1681.8	1182.6
H12	19	19042.7	3132.63	1721.55	3723.19	3704.04
A1	20	40489.9	4684.21	3035.65	4178.12	1583.81
A2	20	218822	40271.9	39491.8	331546	1986.48
A3	20	187762	44501.7	33876	276805	1121.13
A4	20	333190	74089.4	57217.5	419281	2194.65
A5	20	299164	66364.7	60094.2	432624	2132.12
A6	20	193993	45709.1	43301.6	316458	1415.22
A7	20	236575	55399	49168.3	350243	1879.78
A8	20	420128	91979.8	75852.4	519687	3496.94
A9	20	384432	87671.7	70676.5	500818	3048.02
A10	20	381840	86764.8	60682.2	427439	3241.74
A11	20	0	0	0	0	0
A12	20	0	514.602	110.72	850.887	348.226
B1	20	0	0	0	487.623	234.458
B2	20	286735	66873.7	52961	411426	2437.8
B3	20	186026	45237.3	38928.9	297060	1325.04
B4	20	342571	78307	64568.2	446815	9540.33
B5	20	313355	74708	83998.9	596200	3302.22
B6	20	204641	50837.4	60591	429059	2088.07
B7	20	249883	60765.9	69339.6	489129	2351.98
B8	20	434841	95808	81518.3	520978	3791.47
B9	20	361341	81705.1	69094.6	460987	2834.53
B10	20	371047	84944.6	66037	446378	3421.15
B11	20	0	0	132.882	262.03	18.4745
B12	20	0	93.2176	0	44.5488	0
C1	20	1556.97	740.125	600.489	768.687	551.938
C2	20	310545	78107.4	61234.5	447391	7155.31
C3	20	199436	49012.8	44173.5	313653	2027.41
C4	20	321387	80422.3	66719.4	437066	3236.96
C5	20	321302	72716.5	74689.8	481394	2823.04
C6	20	198486	46527.4	50328.4	329725	2002.56
C7	20	259502	61589.7	61310.7	392761	2532.36
C8	20	398051	88290.1	82562.4	511717	3560.4
C9	20	368717	90498.4	72661.4	456921	2535.82
C10	20	365712	86054.1	69057.9	455923	3161.05
C11	20	849.111	640.361	226.478	486.466	244.076
C12	20	0	0	0	345.551	0
D1	20	29902.7	6741.07	5050.63	6736.38	4744.82
D2	20	355187	83972.9	69102.3	488898	2165.82
D3	20	230122	55698.3	52534.7	357232	1873
D4	20	364184	82814.6	75878.3	473575	3237.3
D5	20	375777	85606.4	86904.1	528274	3498.83
D6	20	228223	53494.8	59512.8	367252	1791.53
D7	20	294907	69422.3	72244.6	431997	2660.31
D8	20	436613	100145	93635.1	557207	3502.27
D9	20	385083	90099.5	82190	502133	3498.3
D10	20	406374	97946.1	82215.1	525859	3101.5
D11	20	14945.6	4570.4	4386.68	6716.77	2912.22
D12	20	7928.2	935.28	740.861	1065.32	310.376
E1	20	3851.3	882.836	375.066	610.891	419.617
E2	20	354853	84793.3	73705.9	511860	2998.01
E3	20	252518	66493.1	58641.6	383005	2211.39
E4	20	421789	98733.1	94809.2	571002	3817.15
E5	20	424486	100537	93058.4	550991	3090.94
E6	20	266875	64436.2	63735	376289	2627.33
E7	20	315742	75606.2	73626.8	430670	2335.37
E8	20	520778	122744	113885	657202	4065.33
E9	20	431454	103642	91661.5	548784	3586.96
E10	20	429532	103796	86066	543121	3546.71
E11	20	18037.4	2595.57	1863.79	2477.36	1404.92
E12	20	4961.15	1197.33	899.906	2391.06	2655.99
F1	20	45707.9	8187.3	6190.46	7277.58	3870.68
F2	20	358361	93295.4	76449.3	528495	3118.88
F3	20	274682	70802.3	65012.4	423251	2097.41
F4	20	443010	104842	96050.8	584722	3604.87
F5	20	463994	106974	105012	638453	3250.74
F6	20	278604	72155.6	68122	406529	58454.3
F7	20	344078	84930.7	81319.6	479914	2737.89
F8	20	554016	132653	117144	677130	5522.65
F9	20	504826	122047	105744	634276	4004.43
F10	20	460777	111819	90637.4	578519	3439.56
F11	20	16701.5	2433.95	1548.11	2533.84	33.7102
F12	20	0	0	0	0	458.96
G1	20	16684.9	4928.84	5029.19	10188.8	13611.9
G2	20	420851	104092	81155.2	571212	3041.46
G3	20	325197	80658.3	72684.7	497957	1656.7
G4	20	487221	119102	102105	637346	3744.15
G5	20	468154	112074	99413.6	614434	3508.76
G6	20	297700	73461.9	69326.6	428418	2512.8
G7	20	343406	85466.8	78860.6	485305	4931.95
G8	20	543776	126322	114931	688570	4451.49
G9	20	542520	130746	110961	682675	4768.1
G10	20	432099	105894	87367	576462	2526.13
G11	20	10155.8	2787.22	2557.95	4081.34	2492.46
G12	20	76793.2	15335.6	12484.7	16790.6	9795.54
H1	20	27292.6	5208.92	3665.29	5975.84	6532.31
H2	20	402208	101982	76799.8	562000	3085.24
H3	20	295249	76139.2	63549.5	453253	2363.23
H4	20	467272	108229	95066.1	623739	4566.73
H5	20	501838	122833	105788	667675	4241.81
H6	20	306303	79589	70540.4	457296	2388.18
H7	20	371302	93038.4	84024.5	543705	3042.45
H8	20	548431	123768	111547	702021	5002.9
H9	20	555437	131444	106876	684006	5335.05
H10	20	473504	116038	92086.5	630549	4219.45
H11	20	10292.6	1937.13	514.637	1459.87	1089.58
H12	20	18694.1	3322.3	1641.61	4288.37	3642.04
A1	21	40685	4956.67	2857.61	3973.68	1601.3
A2	21	218414	40036.9	39461.2	331267	1876.06
A3	21	187892	44495.4	33831.4	276845	1129.95
A4	21	332640	74033.4	57183	419372	2275.29
A5	21	299128	66224.4	60170.2	432286	2463.44
A6	21	193983	45690.5	43132	316561	1164.77
A7	21	236484	55407.7	49209.3	349961	2010.09
A8	21	420825	92506.5	75816.8	519499	3618.99
A9	21	385280	87958.3	70615.3	500200	2935.23
A10	21	382890	86583.7	60676.2	427261	3107.89
A11	21	0	0	0	0	0
A12	21	0	290.526	0	527.748	508.521
B1	21	0	0	0	0	0
B2	21	286551	66766.2	52685.8	410465	2315.91
B3	21	186200	44992.1	39010.3	296402	1375.06
B4	21	343212	78316.4	64626.1	446669	9417.88
B5	21	313463	75068.7	83885.8	595979	3117.69
B6	21	204936	50782.5	60650.2	429162	2201.07
B7	21	250266	60943.3	69323.2	489836	2504.9
B8	21	435273	95790.6	81391.1	521565	3600.55
B9	21	362172	81892.3	69181.8	461244	2660.4
B10	21	371916	84854	66055.8	446174	3299.03
B11	21	0	0	0	50.781	0
B12	21	0	88.4977	0	0	60.4562
C1	21	1531.42	627.356	626.067	763.719	304.856
C2	21	310604	77706.3	61131.6	446924	7397.72
C3	21	199846	49430.7	43948.3	313176	1806.41
C4	21	321796	80573.2	66601.8	437094	3027.93
C5	21	321583	72563.4	74668.3	481251	3068.29
C6	21	198779	46708.3	50322	329640	1925.48
C7	21	259500	61330.9	61447.6	392680	2692.38
C8	21	398367	88045.1	82558.4	511115	3574.42
C9	21	368521	90257.9	72567.8	456558	2545.73
C10	21	366026	85888.1	69054.5	456083	3059.34
C11	21	1228.44	369.362	191.248	430.725	654.615
C12	21	0	0	0	271.819	228.465
D1	21	30797.1	6389.39	4942	7180.64	4535.31
D2	21	356986	84006.9	69086.1	488912	2318.79
D3	21	230750	55696.4	52426.4	356957	2031.71
D4	21	365066	82777.4	75670.2	473240	3025.1
D5	21	375764	85461.1	86926.7	528266	3489.75
D6	21	228570	53660.9	59502.3	367611	1853.9
D7	21	294732	69528.7	72072.7	431612	2488.39
D8	21	436531	100136	93562.6	557745	3328.32
D9	21	385096	90027	81955.4	501793	3542.14
D10	21	406445	98099.7	82062	525772	2966.65
D11	21	14718.3	4443.78	4485.24	6688.1	2689.76
D12	21	8518.22	1014.74	594.919	1153.19	311.365
E1	21	3762.2	914.269	546.638	1017.69	467.456
E2	21	355383	84463.8	73837.6	511666	2919.45
E3	21	253716	66717.8	58470.4	382279	2104.69
E4	21	422653	99062.1	95001.4	570844	4058.38
E5	21	424574	100345	92986.3	550802	3330.97
E6	21	266749	64129.4	63523.8	376354	3006.29
E7	21	316095	75990.7	73704.5	431022	2626.19
E8	21	520583	122325	113742	656134	4539.42
E9	21	431482	103362	91671.5	548250	3844.94
E10	21	429425	103939	85947.1	543268	3307.1
E11	21	17695.4	2776	1943.05	2430.45	1386.08
E12	21	4926.26	1147.88	1005.14	2426.51	2549.59
F1	21	45723.6	8179.34	6164.75	6984.29	3666.03
F2	21	358972	93438.8	76408	529200	2983.12
F3	21	275258	70833.9	64947.5	422604	2099.5
F4	21	442947	104733	96170.4	584695	3877.34
F5	21	463421	106707	105145	639378	3437.23
F6	21	278500	71746.2	68000.5	406549	58109.6
F7	21	343828	84862.1	81198.8	479695	2865.08
F8	21	554278	132791	117174	677700	5355.66
F9	21	503787	121667	105255	633967	3932.17
F10	21	459877	111412	90759.7	578539	3209.33
F11	21	16963.3	2714.66	1689.31	2679.44	158.336
F12	21	0	0	0	0	275.891
G1	21	16549	4482.56	4911.44	10677.1	13866.3
[truncated: 10,967 more rows]

## Sheet: Multicomponent Data
Block Type	96alum
Chemistry	SYBR_GREEN
Experiment File Name	D:\HAIFENG\CBF910Untitled.eds
Experiment Run End Time	2013-01-10 13:02:24 PM CST
Instrument Type	sds7500
Passive Reference	ROX
Well	Cycle	SYBR	ROX
A1	1
A2	1	235925	343060
A3	1	190996	282823
A4	1	338150	426160
A5	1	300577	438221
A6	1	194039	321481
A7	1	235583	355154
A8	1	425725	529851
A9	1	389477	509799
A10	1	390412	439217
A11	1
A12	1
B1	1
B2	1	290474	415302
B3	1	185824	300945
B4	1	341305	448531
B5	1	310279	598004
B6	1	201261	433073
B7	1	244585	491567
B8	1	438388	527602
B9	1	366743	465640
B10	1	375446	452452
B11	1
B12	1
C1	1
C2	1	312230	450651
C3	1	199261	319040
C4	1	316001	436650
C5	1	323835	482276
C6	1	197262	332539
C7	1	257385	394700
C8	1	408682	512979
C9	1	373652	460035
C10	1	367054	457854
C11	1
C12	1
D1	1
D2	1	356439	496803
D3	1	228868	360794
D4	1	359014	471310
D5	1	375707	529426
D6	1	228716	373333
D7	1	291578	434425
D8	1	434579	554637
D9	1	390753	504497
D10	1	407928	525326
D11	1
D12	1
E1	1
E2	1	356550	518938
E3	1	242738	386358
E4	1	416805	570988
E5	1	430724	554108
E6	1	269454	381004
E7	1	319635	433659
E8	1	524781	657793
E9	1	437588	556639
E10	1	429166	540737
E11	1
E12	1
F1	1
F2	1	359787	530412
F3	1	271848	424041
F4	1	437272	577803
F5	1	479165	635194
F6	1	287902	414807
F7	1	348375	482457
F8	1	556940	671256
F9	1	512332	638305
F10	1	465003	578705
F11	1
F12	1
G1	1
G2	1	417901	574929
G3	1	322967	498780
G4	1	480178	631533
G5	1	474750	614228
G6	1	304994	436480
G7	1	349172	488984
G8	1	548486	685857
G9	1	551299	682756
G10	1	442541	582210
G11	1
G12	1
H1	1
H2	1	412980	577319
H3	1	299216	463048
H4	1	476122	629816
H5	1	518111	685776
H6	1	313811	470706
H7	1	380919	560982
H8	1	563087	711803
H9	1	569969	696720
H10	1	490156	649151
H11	1
H12	1
A1	2
A2	2	232002	339658
A3	2	190278	280803
A4	2	336461	425352
A5	2	299466	437009
A6	2	194154	320526
A7	2	235712	354119
A8	2	422619	527890
A9	2	385278	507260
A10	2	387812	436919
A11	2
A12	2
B1	2
B2	2	290176	414158
B3	2	185641	299826
B4	2	341865	449081
B5	2	310810	596684
B6	2	201778	432702
B7	2	245567	491214
B8	2	438166	527435
B9	2	363021	464472
B10	2	373696	450654
B11	2
B12	2
C1	2
C2	2	312478	450446
C3	2	198897	317492
C4	2	316712	437600
C5	2	323945	483267
C6	2	198152	332547
C7	2	258031	395697
C8	2	407322	514049
C9	2	371318	460524
C10	2	366752	458683
C11	2
C12	2
D1	2
D2	2	355523	496366
D3	2	229238	360367
D4	2	359730	472532
D5	2	375712	529481
D6	2	228777	372820
D7	2	292949	435377
D8	2	434302	556619
D9	2	389014	506119
D10	2	408561	526677
D11	2
D12	2
E1	2
E2	2	356356	518875
E3	2	245988	386186
E4	2	417333	572002
E5	2	429543	554625
E6	2	268592	380676
E7	2	320235	434349
E8	2	524155	659285
E9	2	435186	556618
E10	2	428746	542554
E11	2
E12	2
F1	2
F2	2	357848	526571
F3	2	272922	424511
F4	2	438803	579994
F5	2	476918	637150
F6	2	286380	413733
F7	2	349179	483815
F8	2	554966	673833
F9	2	510562	639394
F10	2	464151	580752
F11	2
F12	2
G1	2
G2	2	418720	574656
G3	2	323974	498911
G4	2	481648	634997
G5	2	473250	616224
G6	2	304062	435173
G7	2	347992	488461
G8	2	546651	685537
G9	2	551338	685646
G10	2	440352	582097
G11	2
G12	2
H1	2
H2	2	411376	577512
H3	2	298025	461090
H4	2	473709	628309
H5	2	516140	684989
H6	2	312155	469113
H7	2	379182	558290
H8	2	559377	709986
H9	2	567803	695555
H10	2	485422	645719
H11	2
H12	2
A1	3
A2	3	230238	337522
A3	3	189732	280136
A4	3	335667	424113
A5	3	298543	435678
A6	3	193507	319073
A7	3	236116	353507
A8	3	421697	526801
A9	3	382939	505245
A10	3	387809	435586
A11	3
A12	3
B1	3
B2	3	289158	413783
B3	3	185502	299267
B4	3	342580	449727
B5	3	310582	597764
B6	3	201833	431696
B7	3	245912	491667
B8	3	437504	527619
B9	3	361539	464058
B10	3	373108	450466
B11	3
B12	3
C1	3
C2	3	312523	450153
C3	3	198729	316693
C4	3	317476	437913
C5	3	324329	483074
C6	3	199315	332475
C7	3	258631	395730
C8	3	406499	513520
C9	3	370421	460256
C10	3	366548	459195
C11	3
C12	3
D1	3
D2	3	354985	494768
D3	3	229677	360619
D4	3	360303	473534
D5	3	375727	529927
D6	3	228887	371969
D7	3	293784	435101
D8	3	434758	557546
D9	3	387719	505113
D10	3	408523	528002
D11	3
D12	3
E1	3
E2	3	356425	518173
E3	3	246740	386528
E4	3	418219	573489
E5	3	428629	555642
E6	3	269230	380080
E7	3	320856	435185
E8	3	525179	660402
E9	3	433665	555210
E10	3	429157	543299
E11	3
E12	3
F1	3
F2	3	356596	524542
F3	3	274068	425187
F4	3	439955	580936
F5	3	476536	638595
F6	3	285215	412734
F7	3	348829	484392
F8	3	555431	675263
F9	3	509751	640297
F10	3	463825	581324
F11	3
F12	3
G1	3
G2	3	418656	574984
G3	3	324336	499563
G4	3	483260	636117
G5	3	473584	615526
G6	3	303322	434606
G7	3	348155	488122
G8	3	546351	687692
G9	3	548860	684268
G10	3	438775	581637
G11	3
G12	3
H1	3
H2	3	409299	574118
H3	3	296800	458424
H4	3	472300	626135
H5	3	514132	680789
H6	3	311141	466852
H7	3	377694	555063
H8	3	556968	708649
H9	3	565322	693446
H10	3	482708	642701
H11	3
H12	3
A1	4
A2	4	229216	336887
A3	4	189265	279749
A4	4	335612	423519
A5	4	298855	435527
A6	4	193580	318961
A7	4	236142	353496
A8	4	420805	526067
A9	4	382891	504882
A10	4	387235	435131
A11	4
A12	4
B1	4
B2	4	288462	413971
B3	4	186021	299266
B4	4	342993	449792
B5	4	311877	598098
B6	4	202203	431660
B7	4	247018	490803
B8	4	437994	528508
B9	4	361427	463720
B10	4	373638	451327
B11	4
B12	4
C1	4
C2	4	312551	450546
C3	4	198871	316965
C4	4	319165	438732
C5	4	324584	483436
C6	4	199204	332536
C7	4	258945	395603
C8	4	405479	513962
C9	4	370541	460239
C10	4	367160	458824
C11	4
C12	4
D1	4
D2	4	354530	495304
D3	4	229265	360739
D4	4	360568	474048
D5	4	376450	531405
D6	4	228689	371568
D7	4	294171	435306
D8	4	435571	559155
D9	4	387828	505557
D10	4	408874	528203
D11	4
D12	4
E1	4
E2	4	356256	518175
E3	4	247922	386534
E4	4	419336	574588
E5	4	428796	555651
E6	4	268332	380097
E7	4	320595	435086
E8	4	525094	661821
E9	4	433724	555033
E10	4	429346	545673
E11	4
E12	4
F1	4
F2	4	356650	524569
F3	4	274350	425647
F4	4	440615	582795
F5	4	475753	639337
F6	4	284597	412578
F7	4	348735	484466
F8	4	555755	676566
F9	4	509593	640507
F10	4	464357	582234
F11	4
F12	4
G1	4
G2	4	419322	575228
G3	4	324545	499909
G4	4	484279	636036
G5	4	473077	615279
G6	4	303138	434459
G7	4	347300	488820
G8	4	545859	688057
G9	4	549561	684883
G10	4	438199	582240
G11	4
G12	4
H1	4
H2	4	408275	572776
H3	4	295988	457330
H4	4	471377	627131
H5	4	513153	679066
H6	4	310272	465191
H7	4	377317	553968
H8	4	556514	708573
H9	4	564287	692197
H10	4	481620	641271
H11	4
H12	4
A1	5
A2	5	228285	336834
A3	5	189311	279576
A4	5	335319	423356
A5	5	298908	435120
A6	5	193975	318505
A7	5	236717	353043
A8	5	421523	525934
A9	5	382519	504260
A10	5	387009	435364
A11	5
A12	5
B1	5
B2	5	289312	413988
B3	5	186061	298879
B4	5	343864	449967
B5	5	311850	598099
B6	5	202680	431983
B7	5	247375	491249
B8	5	438180	527832
B9	5	361465	463942
B10	5	373896	450690
B11	5
B12	5
C1	5
C2	5	312554	450791
C3	5	198798	316859
C4	5	319198	438532
C5	5	324565	484428
C6	5	199358	332328
C7	5	259494	395719
C8	5	405879	514543
C9	5	370703	460626
C10	5	367344	459121
C11	5
C12	5
D1	5
D2	5	355370	495165
D3	5	229674	360837
D4	5	361272	474455
D5	5	376934	532137
D6	5	228578	371686
D7	5	294705	435505
D8	5	436022	559171
D9	5	388504	506301
D10	5	409491	528540
D11	5
D12	5
E1	5
E2	5	357031	518598
E3	5	249069	387020
E4	5	420467	574842
E5	5	428812	556530
E6	5	269035	380200
E7	5	320569	435541
E8	5	525560	661822
E9	5	434663	555264
E10	5	429937	546730
E11	5
E12	5
F1	5
F2	5	357001	526376
F3	5	274602	426462
F4	5	441774	584293
F5	5	475437	641343
F6	5	284546	412472
F7	5	349036	485005
F8	5	556958	678404
F9	5	509889	640220
F10	5	465087	582312
F11	5
F12	5
G1	5
G2	5	419605	575709
G3	5	325322	499781
G4	5	484608	637088
G5	5	473925	617137
G6	5	302902	434239
G7	5	348158	489191
G8	5	546302	690346
G9	5	549960	685043
G10	5	437689	582442
G11	5
G12	5
H1	5
H2	5	408125	571461
H3	5	296011	457250
H4	5	471804	626263
H5	5	512730	678004
H6	5	310233	464868
H7	5	377290	553086
H8	5	555711	708151
H9	5	565017	691526
H10	5	480877	640815
H11	5
H12	5
A1	6
A2	6	227311	336389
A3	6	190009	279235
A4	6	335665	423052
A5	6	299256	435333
A6	6	194525	318283
A7	6	237512	353363
A8	6	422294	525538
A9	6	383224	504458
A10	6	386779	435082
A11	6
A12	6
B1	6
B2	6	289156	414202
B3	6	186892	298737
B4	6	344170	450102
B5	6	312616	598182
B6	6	203360	431981
B7	6	248054	491069
B8	6	438810	527188
B9	6	361772	464586
B10	6	374574	450570
B11	6
B12	6
C1	6
C2	6	313143	451381
C3	6	199511	316420
C4	6	320600	439173
C5	6	325223	484318
C6	6	199860	332437
C7	6	260039	394895
C8	6	406315	514326
C9	6	370992	460487
C10	6	368059	459381
C11	6
C12	6
D1	6
D2	6	356300	494565
D3	6	230970	360680
D4	6	362800	475160
D5	6	377494	531746
D6	6	229091	371226
D7	6	295813	435747
D8	6	437231	560512
D9	6	388114	506186
D10	6	410325	529340
D11	6
D12	6
E1	6
E2	6	357243	517645
E3	6	250303	387553
E4	6	421026	575478
E5	6	429081	556596
E6	6	269666	380092
E7	6	320840	435278
E8	6	525902	661743
E9	6	434792	555494
E10	6	430815	546412
E11	6
E12	6
F1	6
F2	6	357708	526409
F3	6	275839	426597
F4	6	442419	584638
F5	6	475339	641476
F6	6	284208	412013
F7	6	349483	484487
F8	6	557550	678802
F9	6	510571	640607
F10	6	465179	582684
F11	6
F12	6
G1	6
G2	6	420672	575824
G3	6	326024	500132
G4	6	486411	639495
G5	6	474037	617968
G6	6	303273	433929
G7	6	347968	489016
G8	6	547178	689591
G9	6	549603	687566
G10	6	438073	582320
G11	6
G12	6
H1	6
H2	6	408676	570260
H3	6	296775	456443
H4	6	472512	626904
H5	6	513332	678261
H6	6	310309	463533
H7	6	377206	552200
H8	6	556401	706207
H9	6	565571	690989
H10	6	481101	639611
H11	6
H12	6
A1	7
A2	7	226121	335293
A3	7	189951	278829
A4	7	336157	422971
A5	7	299627	435551
A6	7	194541	318454
A7	7	238080	352573
A8	7	422490	525046
A9	7	383721	504552
A10	7	387640	434239
A11	7
A12	7
B1	7
B2	7	289962	414075
B3	7	187538	299057
B4	7	345030	449810
B5	7	312603	597562
B6	7	203871	431496
B7	7	248817	491445
B8	7	439355	526295
B9	7	362872	464213
B10	7	375092	450248
B11	7
B12	7
C1	7
C2	7	313675	450002
C3	7	200041	316300
C4	7	321522	439259
C5	7	325443	484062
C6	7	199985	332475
C7	7	260414	394828
C8	7	406213	514659
C9	7	371599	460500
C10	7	368296	459246
C11	7
C12	7
D1	7
D2	7	356519	494631
D3	7	231468	361058
D4	7	363577	475208
D5	7	377430	531295
D6	7	229605	370608
D7	7	295234	435680
D8	7	437795	559395
D9	7	389383	506122
D10	7	410792	528532
D11	7
D12	7
E1	7
E2	7	358715	518219
E3	7	250744	386390
E4	7	421405	574950
E5	7	429319	556549
E6	7	269596	379924
E7	7	321111	435168
E8	7	526630	661953
E9	7	435461	554935
E10	7	431257	547348
E11	7
E12	7
F1	7
F2	7	358444	526798
F3	7	275975	426380
F4	7	442956	585602
F5	7	475909	641426
F6	7	284460	411921
F7	7	349127	484249
F8	7	558447	679670
F9	7	511009	640540
F10	7	465785	582805
F11	7
F12	7
G1	7
G2	7	421611	575874
G3	7	326851	499905
G4	7	487537	638405
G5	7	474423	618614
G6	7	303143	432667
G7	7	348720	488567
G8	7	547576	689469
G9	7	549864	687504
G10	7	438286	582007
G11	7
G12	7
H1	7
H2	7	408420	569040
H3	7	296951	456190
H4	7	472705	625995
H5	7	512166	677221
H6	7	310638	462996
H7	7	377258	551132
H8	7	556521	707731
H9	7	565737	690475
H10	7	480431	638907
H11	7
H12	7
A1	8
A2	8	225849	335613
A3	8	189653	279328
A4	8	336889	423054
A5	8	300201	435272
A6	8	194741	318173
A7	8	238202	352914
A8	8	423139	524488
A9	8	384291	504052
A10	8	387568	433560
A11	8
A12	8
B1	8
B2	8	289622	414533
B3	8	187558	298768
B4	8	344977	449585
B5	8	313772	598359
B6	8	204183	431508
B7	8	249353	490168
B8	8	440085	526502
B9	8	363494	464054
B10	8	375779	450321
B11	8
B12	8
C1	8
C2	8	314535	451109
C3	8	200078	316185
C4	8	322191	438450
C5	8	325630	483402
C6	8	200433	331791
C7	8	260466	394999
C8	8	406489	514672
C9	8	372131	460345
C10	8	368725	458903
C11	8
C12	8
D1	8
D2	8	357409	494180
D3	8	231335	360906
D4	8	364312	475775
D5	8	378621	531817
D6	8	229963	370749
D7	8	296387	435744
D8	8	439282	560168
D9	8	389817	506149
D10	8	411544	529090
D11	8
D12	8
E1	8
E2	8	358375	517945
E3	8	252182	387168
E4	8	422586	575490
E5	8	429922	556196
E6	8	270008	380187
E7	8	321337	435012
E8	8	526850	661924
E9	8	436195	554618
E10	8	432081	546790
E11	8
E12	8
F1	8
F2	8	359214	527141
F3	8	276350	426199
F4	8	444616	585702
F5	8	475989	642229
F6	8	284870	411678
F7	8	349451	484111
F8	8	558573	680898
F9	8	511822	640403
F10	8	466452	582557
F11	8
F12	8
G1	8
G2	8	422189	576101
G3	8	326759	499930
G4	8	488067	639920
G5	8	474555	617702
G6	8	303566	433050
G7	8	348948	488905
G8	8	548529	690495
G9	8	551531	686880
G10	8	438536	581587
G11	8
G12	8
H1	8
H2	8	409258	568142
H3	8	297079	455887
H4	8	473021	626644
H5	8	512917	676099
H6	8	310393	462573
H7	8	377623	550126
H8	8	556534	707470
H9	8	565357	689785
H10	8	481382	637712
H11	8
H12	8
A1	9
A2	9	225320	335288
A3	9	190231	278941
A4	9	337276	422997
A5	9	300879	434953
A6	9	195021	318150
A7	9	238721	352816
A8	9	423406	524573
A9	9	385030	504045
A10	9	388569	433647
A11	9
A12	9
B1	9
B2	9	290317	413405
B3	9	187698	299265
B4	9	345562	449478
B5	9	313883	598477
B6	9	204725	431007
B7	9	250280	490500
B8	9	440547	526397
B9	9	363583	464355
B10	9	375476	450354
B11	9
B12	9
C1	9
C2	9	314573	450148
C3	9	200769	316221
C4	9	322769	438794
C5	9	326296	483971
C6	9	200414	331877
C7	9	260956	395174
C8	9	406992	514619
C9	9	372969	460325
C10	9	369370	459551
C11	9
C12	9
D1	9
D2	9	357542	493791
D3	9	231440	360108
D4	9	365633	475485
D5	9	378727	531759
D6	9	230160	370216
D7	9	296958	435260
D8	9	439932	560939
D9	9	389961	505980
D10	9	411346	528766
D11	9
D12	9
E1	9
E2	9	358582	518043
E3	9	252315	386345
E4	9	423238	575360
E5	9	431196	555384
E6	9	269884	379683
E7	9	321921	435010
E8	9	527173	662385
E9	9	436598	554873
E10	9	432275	547027
E11	9
E12	9
F1	9
F2	9	359010	527178
F3	9	277370	426131
F4	9	445037	586173
F5	9	475498	642040
F6	9	284271	411190
F7	9	349866	483937
F8	9	559883	678894
F9	9	512589	639979
F10	9	467186	582858
F11	9
F12	9
G1	9
G2	9	423578	575736
G3	9	327599	499911
G4	9	489148	639410
G5	9	474986	617783
G6	9	303264	432392
G7	9	349042	488597
G8	9	549170	691337
G9	9	551909	687219
G10	9	438933	581363
G11	9
G12	9
H1	9
H2	9	408996	567788
H3	9	297353	455989
H4	9	473064	626727
H5	9	512192	675645
H6	9	310623	461956
H7	9	377874	549578
H8	9	557020	706194
H9	9	566627	689253
H10	9	480943	636935
H11	9
H12	9
A1	10
A2	10	224482	334624
A3	10	190516	278584
A4	10	336950	422519
A5	10	301268	434735
A6	10	195238	317953
A7	10	239243	352231
A8	10	424102	524442
A9	10	385555	503030
A10	10	388250	432984
A11	10
A12	10
B1	10
B2	10	290444	413260
B3	10	187632	298492
B4	10	345980	449487
B5	10	313973	598991
B6	10	205144	430990
B7	10	250360	490400
B8	10	440819	526752
B9	10	363998	464061
B10	10	375985	450238
B11	10
B12	10
C1	10
C2	10	315105	449594
C3	10	201068	315651
C4	10	323961	438658
C5	10	326246	484357
C6	10	200407	331349
C7	10	261473	394252
C8	10	406651	514258
C9	10	373008	460615
C10	10	369493	459013
C11	10
C12	10
D1	10
D2	10	358179	493905
D3	10	231773	359894
D4	10	365420	475170
D5	10	379843	531681
D6	10	230431	369853
D7	10	296960	435211
D8	10	440484	560129
D9	10	390672	505761
D10	10	412056	528606
D11	10
D12	10
E1	10
E2	10	359804	517147
E3	10	253202	386408
E4	10	423571	574987
E5	10	431022	555456
E6	10	269876	379458
E7	10	321370	434534
E8	10	528011	661889
E9	10	436641	554549
E10	10	432662	546646
E11	10
E12	10
F1	10
F2	10	360259	527175
F3	10	277125	426280
F4	10	445516	586395
F5	10	475970	642339
F6	10	284306	410824
F7	10	349570	483699
F8	10	559906	679895
F9	10	512744	640119
F10	10	466979	582860
F11	10
F12	10
G1	10
G2	10	424278	575056
G3	10	328127	499864
G4	10	490042	639357
G5	10	475353	616938
G6	10	303399	432280
G7	10	349106	489045
G8	10	548709	690851
G9	10	551976	687087
G10	10	439131	580623
G11	10
G12	10
H1	10
H2	10	408210	567000
H3	10	298160	455384
H4	10	473762	626278
H5	10	512205	674037
H6	10	310685	461656
H7	10	377212	548813
H8	10	557004	707395
H9	10	566460	690141
H10	10	481309	637272
H11	10
H12	10
A1	11
A2	11	223863	334156
A3	11	190337	278516
A4	11	337329	422861
A5	11	301070	434865
A6	11	195382	317643
A7	11	238922	352278
A8	11	423935	523401
A9	11	386319	503260
A10	11	387959	432469
A11	11
A12	11
B1	11
B2	11	290468	413255
B3	11	188036	298703
B4	11	346456	449129
B5	11	314499	597801
B6	11	205304	430533
B7	11	250777	490906
B8	11	440274	525106
B9	11	364278	464304
B10	11	376436	449758
B11	11
B12	11
C1	11
C2	11	314940	449713
C3	11	200592	315519
C4	11	324358	438759
C5	11	326848	483588
C6	11	200655	331297
C7	11	261102	394217
C8	11	406588	514032
C9	11	373008	460294
C10	11	369496	458543
C11	11
C12	11
D1	11
D2	11	358122	493383
D3	11	232181	359988
D4	11	366361	475423
D5	11	379369	531488
D6	11	230585	370313
D7	11	297282	435486
D8	11	440553	559425
D9	11	390280	505447
D10	11	412373	528953
D11	11
D12	11
E1	11
E2	11	359119	516436
E3	11	253690	385970
E4	11	424622	575422
E5	11	430303	555563
E6	11	269864	379203
E7	11	321375	434427
E8	11	528659	661955
E9	11	436793	553774
E10	11	432694	546512
E11	11
E12	11
F1	11
F2	11	360594	527303
F3	11	277937	426027
F4	11	446142	586267
F5	11	475220	642505
F6	11	283941	410519
F7	11	349555	483730
F8	11	560782	680629
F9	11	512690	639879
F10	11	466734	582013
F11	11
F12	11
G1	11
G2	11	424217	574944
G3	11	328852	499952
G4	11	490587	639252
G5	11	475543	617304
G6	11	303248	431992
G7	11	349201	488410
G8	11	549090	690020
G9	11	551922	687435
G10	11	439315	581385
G11	11
G12	11
H1	11
H2	11	408666	566283
H3	11	297853	455098
H4	11	473315	627208
H5	11	512694	673842
H6	11	311021	461098
H7	11	377768	548577
H8	11	556401	707576
H9	11	566166	690465
H10	11	481685	636186
H11	11
H12	11
A1	12
A2	12	223442	333472
A3	12	190454	277987
A4	12	336740	422169
A5	12	302004	434117
A6	12	195905	317777
A7	12	238933	351896
A8	12	424541	523509
A9	12	387062	503458
A10	12	387568	432144
A11	12
A12	12
B1	12
B2	12	290846	413149
B3	12	188418	298448
B4	12	346970	449281
B5	12	314914	597840
B6	12	205633	430326
B7	12	251718	490386
B8	12	440982	525513
B9	12	364850	463773
B10	12	376433	449294
B11	12
B12	12
C1	12
C2	12	315754	449968
C3	12	200952	315310
C4	12	324674	438407
C5	12	326369	483480
C6	12	200652	331718
C7	12	261400	394185
C8	12	406673	513842
C9	12	374130	459816
C10	12	369719	459138
C11	12
C12	12
D1	12
D2	12	359213	492969
D3	12	232180	360388
D4	12	367131	475544
D5	12	380400	531642
D6	12	230836	369756
D7	12	297290	435071
D8	12	441143	559850
D9	12	390789	505177
D10	12	412571	528482
D11	12
D12	12
E1	12
E2	12	360186	515933
E3	12	254133	385686
E4	12	424988	574877
E5	12	430652	554882
E6	12	270387	378838
E7	12	321580	434049
E8	12	528537	661827
E9	12	437694	553593
E10	12	433218	545685
E11	12
E12	12
F1	12
F2	12	360846	527774
F3	12	277986	426144
F4	12	447003	586836
F5	12	475080	641752
F6	12	284143	410332
F7	12	349524	483451
F8	12	561468	680412
F9	12	513168	640068
F10	12	467343	582143
F11	12
F12	12
G1	12
G2	12	425306	574977
G3	12	329084	499767
G4	12	491250	640634
G5	12	475362	617760
G6	12	303144	431229
G7	12	349053	488279
G8	12	550659	690481
G9	12	552304	686698
G10	12	439865	581072
G11	12
G12	12
H1	12
H2	12	408804	565979
H3	12	298655	455392
H4	12	474266	624753
H5	12	512398	671700
H6	12	310816	460542
H7	12	377548	548176
H8	12	556927	706729
H9	12	566126	689292
H10	12	480922	635593
H11	12
H12	12
A1	13
A2	13	222932	333757
A3	13	190460	278101
A4	13	338145	421863
A5	13	301538	434465
A6	13	195937	317415
A7	13	239512	351660
A8	13	425048	523097
A9	13	387212	502945
A10	13	388339	431880
A11	13
A12	13
B1	13
B2	13	290673	412605
B3	13	188477	298086
B4	13	347431	448966
B5	13	315727	598379
B6	13	206040	430275
B7	13	251704	490401
B8	13	440988	526025
B9	13	365751	463501
B10	13	376795	449254
B11	13
B12	13
C1	13
C2	13	316328	449898
C3	13	201100	314946
C4	13	325200	438741
C5	13	326583	483441
C6	13	201022	331160
C7	13	261801	394187
C8	13	406216	513538
C9	13	373792	459212
C10	13	369812	458413
C11	13
C12	13
D1	13
D2	13	358783	492768
D3	13	232756	358830
D4	13	367260	474787
D5	13	380482	531571
D6	13	230820	369614
D7	13	297888	434653
D8	13	441958	559608
D9	13	391113	505365
D10	13	412346	528847
D11	13
D12	13
E1	13
E2	13	359562	516654
E3	13	254485	385733
E4	13	425544	574682
E5	13	431052	554393
E6	13	270011	378165
E7	13	321552	433653
E8	13	529239	661701
E9	13	438098	553307
E10	13	433372	547489
E11	13
E12	13
F1	13
F2	13	361391	528354
F3	13	278245	425961
F4	13	446875	586416
F5	13	475454	642204
F6	13	284015	409651
F7	13	349305	483432
F8	13	561562	680804
F9	13	513671	639020
F10	13	467663	582369
F11	13
F12	13
G1	13
G2	13	426194	574855
G3	13	328695	499871
G4	13	492148	640413
G5	13	475956	616982
G6	13	303372	431450
G7	13	349288	487543
G8	13	549998	692458
G9	13	552626	687587
G10	13	439341	580453
G11	13
G12	13
H1	13
H2	13	409207	566028
H3	13	299529	455262
H4	13	474281	625309
H5	13	512343	673712
H6	13	311111	460687
H7	13	377880	547754
H8	13	557409	705972
H9	13	566243	688006
H10	13	481815	635368
H11	13
H12	13
A1	14
A2	14	222442	333271
A3	14	190416	278211
A4	14	337468	421527
A5	14	301863	434186
A6	14	196371	317485
A7	14	239367	351253
A8	14	424623	522818
A9	14	387356	502704
A10	14	387628	431288
A11	14
A12	14
B1	14
B2	14	290029	412595
B3	14	188672	297715
B4	14	347066	448365
B5	14	316273	597416
B6	14	206489	430327
B7	14	251874	489941
B8	14	440425	524890
B9	14	365520	463207
B10	14	376330	449125
B11	14
B12	14
C1	14
C2	14	315505	449180
C3	14	201583	314784
C4	14	325556	438533
C5	14	326339	482985
C6	14	201022	331444
C7	14	262431	394255
C8	14	405858	513168
C9	14	373834	459555
C10	14	369732	458189
C11	14
C12	14
D1	14
D2	14	358713	492061
D3	14	232461	359056
D4	14	367044	475759
D5	14	380090	531138
D6	14	231301	369335
D7	14	297295	434213
D8	14	441997	560208
D9	14	390446	505194
D10	14	412551	528099
D11	14
D12	14
E1	14
E2	14	359566	515137
E3	14	254706	385177
E4	14	425247	574623
E5	14	430847	554216
E6	14	270193	378360
E7	14	321551	433490
E8	14	528720	661559
E9	14	437874	552619
E10	14	433259	546282
E11	14
E12	14
F1	14
F2	14	361712	528381
F3	14	277980	425751
F4	14	447580	586469
F5	14	473752	641766
F6	14	284237	409504
F7	14	349605	482882
F8	14	561363	680361
F9	14	512909	638650
F10	14	467829	581359
F11	14
F12	14
G1	14
G2	14	425939	575108
G3	14	329171	499750
G4	14	491993	639694
G5	14	475514	616058
G6	14	303365	430808
G7	14	348840	487649
G8	14	550423	691694
G9	14	552184	686692
G10	14	439413	579549
G11	14
G12	14
H1	14
H2	14	409346	565691
H3	14	299216	454876
H4	14	474042	625303
H5	14	512193	672007
H6	14	311065	460262
H7	14	377075	547172
H8	14	556741	706257
H9	14	564794	687703
H10	14	481250	634682
H11	14
H12	14
A1	15
A2	15	221805	333170
A3	15	190421	278171
A4	15	337021	421513
A5	15	301999	434275
A6	15	196242	317597
A7	15	239736	351586
A8	15	424675	522651
A9	15	387640	502829
A10	15	387176	431000
A11	15
A12	15
B1	15
B2	15	290234	412608
B3	15	188444	298272
B4	15	347031	448118
B5	15	316362	597538
B6	15	206511	430243
B7	15	252198	490215
B8	15	440319	524140
B9	15	365475	463340
B10	15	376006	448898
B11	15
B12	15
C1	15
C2	15	315625	449114
C3	15	201673	314684
C4	15	325666	438497
C5	15	326314	483043
C6	15	201184	331028
C7	15	262279	394509
C8	15	405483	513767
C9	15	373390	459118
C10	15	370513	458307
C11	15
C12	15
D1	15
D2	15	358904	492243
D3	15	232372	358758
D4	15	367206	474966
D5	15	380510	530968
D6	15	231172	369160
D7	15	297242	434343
D8	15	442089	560046
D9	15	390985	504953
D10	15	412405	528083
D11	15
D12	15
E1	15
E2	15	359573	514968
E3	15	255171	385283
E4	15	425797	574439
E5	15	430952	554174
E6	15	270321	378432
E7	15	321160	433709
E8	15	528920	661856
E9	15	438392	552818
E10	15	433591	546365
E11	15
E12	15
F1	15
F2	15	362528	529322
F3	15	278421	425752
F4	15	447589	586301
F5	15	473702	642054
F6	15	283721	409378
F7	15	349118	482985
F8	15	561343	681526
F9	15	512855	638279
F10	15	466941	581440
F11	15
F12	15
G1	15
G2	15	426080	574371
G3	15	329471	499065
G4	15	492429	640335
G5	15	475306	617145
G6	15	302929	431099
G7	15	349065	487948
G8	15	550306	692083
G9	15	551333	687345
G10	15	439369	579668
G11	15
G12	15
H1	15
H2	15	408715	565100
H3	15	298749	454678
H4	15	473912	626099
H5	15	511439	673127
H6	15	311148	459715
H7	15	377241	546965
H8	15	557030	706766
H9	15	564736	687554
H10	15	481878	634974
H11	15
H12	15
A1	16
A2	16	221794	333484
A3	16	189939	277679
A4	16	337396	421338
A5	16	302556	434231
A6	16	196416	317163
A7	16	239591	351419
A8	16	424653	522145
A9	16	387692	502288
A10	16	387030	430092
A11	16
A12	16
B1	16
B2	16	290989	412156
B3	16	188329	297827
B4	16	347378	448039
B5	16	316505	596413
B6	16	206978	429781
B7	16	252606	489134
B8	16	439247	523871
B9	16	365653	463794
B10	16	376205	448653
B11	16
B12	16
C1	16
C2	16	315343	448716
C3	16	201660	314932
C4	16	325805	438705
C5	16	325909	483351
C6	16	201152	331038
C7	16	262503	394108
C8	16	405315	513122
C9	16	374242	458897
C10	16	369544	457892
C11	16
C12	16
D1	16
D2	16	359046	491429
D3	16	232106	359046
D4	16	367515	475228
D5	16	380480	530802
D6	16	230611	369457
D7	16	297349	434022
D8	16	441782	559972
D9	16	390488	504479
D10	16	412744	528377
D11	16
D12	16
E1	16
E2	16	359773	514343
E3	16	255352	384837
E4	16	426020	573653
E5	16	430637	553970
E6	16	270185	378144
E7	16	321061	433058
E8	16	528419	660354
E9	16	437688	552452
E10	16	433526	545259
E11	16
E12	16
F1	16
F2	16	362943	528510
F3	16	278840	425309
F4	16	447633	586876
F5	16	472716	642144
F6	16	283636	409517
F7	16	349058	483029
F8	16	561400	679620
F9	16	512836	637911
F10	16	467774	581806
F11	16
F12	16
G1	16
G2	16	426323	574434
G3	16	330063	499521
G4	16	492804	639562
G5	16	475443	617685
G6	16	303132	430642
G7	16	348981	487272
G8	16	550690	691259
G9	16	552127	685987
G10	16	439097	579268
G11	16
G12	16
H1	16
H2	16	408914	564645
H3	16	299380	454576
H4	16	474079	623981
H5	16	511093	670946
H6	16	310479	459724
H7	16	376839	546496
H8	16	556857	706387
H9	16	564527	687623
H10	16	480944	634056
H11	16
H12	16
A1	17
A2	17	220907	332674
A3	17	190473	277369
A4	17	337047	421447
A5	17	302097	433874
A6	17	196364	317252
A7	17	239974	351178
A8	17	424597	521506
A9	17	388093	502321
A10	17	386548	430219
A11	17
A12	17
B1	17
B2	17	290206	412165
B3	17	188690	297681
B4	17	346638	448182
B5	17	316714	596085
B6	17	207044	429830
B7	17	253005	490260
B8	17	439995	524173
B9	17	365591	463233
B10	17	376328	448443
B11	17
B12	17
C1	17
C2	17	315141	448276
C3	17	201800	314872
C4	17	325941	438738
C5	17	326368	482506
C6	17	201030	330561
C7	17	262588	393774
C8	17	404877	513289
C9	17	373773	458733
C10	17	370958	457381
C11	17
C12	17
D1	17
D2	17	358966	491588
D3	17	232442	358926
D4	17	368112	474228
D5	17	380204	530443
D6	17	230818	369024
D7	17	297759	433927
D8	17	442397	559857
D9	17	390730	504280
D10	17	412507	528079
D11	17
D12	17
E1	17
E2	17	360027	514338
E3	17	256312	384811
E4	17	426498	573918
E5	17	430985	553172
E6	17	270961	378248
E7	17	320705	432920
E8	17	528729	661620
E9	17	437799	552016
E10	17	433281	544531
E11	17
E12	17
F1	17
F2	17	363555	529226
F3	17	278946	425302
F4	17	448335	586622
F5	17	472705	641897
F6	17	283474	408775
F7	17	349337	482095
F8	17	561929	680728
F9	17	512018	637519
F10	17	467127	581515
F11	17
F12	17
G1	17
G2	17	426920	573876
G3	17	329732	498964
G4	17	493099	639903
G5	17	475840	616782
G6	17	303125	430434
G7	17	348775	487428
G8	17	549533	692402
G9	17	551555	685379
G10	17	439097	579303
G11	17
G12	17
H1	17
H2	17	409080	564161
H3	17	299652	455274
H4	17	473342	624612
H5	17	511470	671923
H6	17	310736	459239
H7	17	377280	545855
H8	17	556479	706173
H9	17	564653	688145
H10	17	480925	633782
H11	17
H12	17
A1	18
A2	18	220531	332485
A3	18	190707	277422
A4	18	336703	420900
A5	18	302896	433719
A6	18	196233	317017
A7	18	239797	350815
A8	18	423973	521712
A9	18	388263	501681
A10	18	386468	429856
A11	18
A12	18
B1	18
B2	18	290279	411765
B3	18	188728	297702
B4	18	347577	447683
B5	18	317210	596253
B6	18	207664	429748
B7	18	253229	489034
B8	18	439712	524002
B9	18	365813	462956
B10	18	376765	448468
B11	18
B12	18
C1	18
C2	18	315719	448662
C3	18	202149	314359
C4	18	326435	438732
C5	18	325939	482840
C6	18	201045	330596
C7	18	262270	393780
C8	18	404299	512948
C9	18	374090	458456
C10	18	370421	458076
C11	18
C12	18
D1	18
D2	18	359435	490440
D3	18	232572	357990
D4	18	367665	474952
D5	18	380337	530550
D6	18	231010	368777
D7	18	297484	434292
D8	18	442616	558685
D9	18	390147	504164
D10	18	412114	527810
D11	18
D12	18
E1	18
E2	18	359389	513778
E3	18	255771	384359
E4	18	426521	573376
E5	18	430428	553298
E6	18	270260	378005
E7	18	320598	432719
E8	18	527970	660134
E9	18	437650	551516
E10	18	432834	545250
E11	18
E12	18
F1	18
F2	18	363511	529564
F3	18	279188	424752
F4	18	448185	586824
F5	18	471275	641568
F6	18	283047	408213
F7	18	348578	482174
F8	18	561583	680697
F9	18	512097	637493
F10	18	466978	581115
F11	18
F12	18
G1	18
G2	18	427283	574035
G3	18	329932	499911
G4	18	493293	639975
G5	18	475088	617562
G6	18	302819	430015
G7	18	348767	487358
G8	18	550077	692383
G9	18	551058	685829
G10	18	438628	578280
G11	18
G12	18
H1	18
H2	18	408640	564273
H3	18	299361	454566
H4	18	474020	625882
H5	18	510113	671953
H6	18	310798	459019
H7	18	377018	545706
H8	18	555032	704511
H9	18	563764	686235
H10	18	481131	632943
H11	18
H12	18
A1	19
A2	19	220405	332205
A3	19	190687	277331
A4	19	337340	420683
A5	19	302554	433363
A6	19	196407	316716
A7	19	239652	351099
A8	19	424924	520998
A9	19	388742	501530
A10	19	386350	429342
A11	19
A12	19
B1	19
B2	19	290277	411389
B3	19	188696	297487
B4	19	346773	447492
B5	19	317599	597073
B6	19	207296	429876
B7	19	253151	488436
B8	19	439770	523451
B9	19	365666	462920
B10	19	376238	448025
B11	19
B12	19
C1	19
C2	19	316284	448474
C3	19	202144	314185
C4	19	325944	438143
C5	19	326163	482782
C6	19	200938	330397
C7	19	262753	393920
C8	19	403810	513152
C9	19	373846	458274
C10	19	370673	457818
C11	19
C12	19
D1	19
D2	19	360099	490607
D3	19	233579	358361
D4	19	367896	474985
D5	19	380590	531145
D6	19	231368	368845
D7	19	297711	433758
D8	19	442297	559468
D9	19	390168	504114
D10	19	412225	527659
D11	19
D12	19
E1	19
E2	19	359933	513451
E3	19	256807	383753
E4	19	426546	573609
E5	19	430556	553606
E6	19	270987	377905
E7	19	320372	432763
E8	19	527798	658736
E9	19	437895	551175
E10	19	432521	546790
E11	19
E12	19
F1	19
F2	19	363610	529826
F3	19	279396	424883
F4	19	448609	587005
F5	19	470770	641186
F6	19	283096	408455
F7	19	349169	482011
F8	19	561988	680898
F9	19	512895	637217
F10	19	467383	581694
F11	19
F12	19
G1	19
G2	19	427015	573883
G3	19	330126	499399
G4	19	493835	640513
G5	19	474742	617186
G6	19	302968	429986
G7	19	348639	486967
G8	19	550367	691810
G9	19	551346	684970
G10	19	438774	578777
G11	19
G12	19
H1	19
H2	19	408695	563947
H3	19	299880	454645
H4	19	473882	624873
H5	19	510404	670173
H6	19	311650	458755
H7	19	377152	545521
H8	19	555675	705618
H9	19	563253	687244
H10	19	481110	633038
H11	19
H12	19
A1	20
A2	20	219463	331935
A3	20	190244	277037
A4	20	337090	420024
A5	20	302703	433238
A6	20	196395	316558
A7	20	239719	350655
A8	20	424976	520909
A9	20	389264	501910
A10	20	386474	428675
A11	20
A12	20
B1	20
B2	20	290428	412157
B3	20	188697	297349
B4	20	346945	447690
B5	20	317678	596727
B6	20	207649	429253
B7	20	253418	489349
B8	20	439593	522433
B9	20	365867	462212
B10	20	375784	447619
B11	20
B12	20
C1	20
C2	20	315338	448396
C3	20	202055	314158
C4	20	326190	438121
C5	20	325272	482529
C6	20	201052	330309
C7	20	262767	393542
C8	20	402810	513316
C9	20	374060	458438
C10	20	370662	457326
C11	20
C12	20
D1	20
D2	20	360039	490069
D3	20	233387	357972
D4	20	368734	474958
D5	20	380447	529941
D6	20	231169	368297
D7	20	297647	433580
D8	20	442100	559476
D9	20	390154	504116
D10	20	412105	527780
D11	20
D12	20
E1	20
E2	20	359810	513207
E3	20	256678	384177
E4	20	426799	573316
E5	20	430129	553165
E6	20	270494	377730
E7	20	319822	432492
E8	20	527590	660419
E9	20	437398	551309
E10	20	433282	545175
E11	20
E12	20
F1	20
F2	20	364316	530208
F3	20	279080	424793
F4	20	449012	587077
F5	20	469967	640728
F6	20	282913	408156
F7	20	348960	481888
F8	20	561574	680417
F9	20	511924	637149
F10	20	467403	580796
F11	20
F12	20
G1	20
G2	20	427166	572963
G3	20	330109	499327
G4	20	494321	639882
G5	20	474662	616743
G6	20	302025	429837
G7	20	348094	486969
G8	20	550238	691619
G9	20	550209	685593
G10	20	438484	578411
G11	20
G12	20
H1	20
H2	20	408494	563639
H3	20	300082	454480
H4	20	473429	625844
H5	20	509142	670297
H6	20	311270	458673
H7	20	376963	545358
H8	20	555294	704695
H9	20	563062	686698
H10	20	480500	632696
H11	20
H12	20
A1	21
A2	21	219030	331656
A3	21	190371	277072
A4	21	336541	420110
A5	21	302651	432916
A6	21	196382	316636
A7	21	239631	350384
A8	21	425726	520720
A9	21	390135	501294
A10	21	387482	428497
A11	21
A12	21
B1	21
B2	21	290233	411177
B3	21	188839	296711
B4	21	347579	447554
B5	21	317824	596495
B6	21	207935	429362
B7	21	253815	490042
B8	21	440017	522992
B9	21	366709	462475
B10	21	376630	447419
B11	21
B12	21
C1	21
C2	21	315347	447923
C3	21	202507	313660
C4	21	326611	438134
C5	21	325535	482385
C6	21	201359	330224
C7	21	262740	393483
C8	21	403099	512725
C9	21	373841	458069
C10	21	370954	457482
C11	21
C12	21
D1	21
D2	21	361816	490080
D3	21	234007	357688
D4	21	369603	474600
D5	21	380420	529936
D6	21	231528	368647
D7	21	297484	433179
D8	21	442018	559993
D9	21	390160	503752
D10	21	412191	527676
D11	21
D12	21
E1	21
E2	21	360293	513031
E3	21	257886	383441
E4	21	427687	573186
E5	21	430197	552970
E6	21	270340	377764
E7	21	320206	432849
E8	21	527358	659352
E9	21	437398	550786
E10	21	433191	545304
E11	21
E12	21
F1	21
F2	21	364935	530898
F3	21	279653	424148
F4	21	448938	587066
F5	21	469373	641654
F6	21	282771	408158
F7	21	348706	481656
F8	21	561847	680981
F9	21	510857	636782
F10	21	466469	580830
F11	21
F12	21
G1	21
[truncated: 10,967 more rows]

## Sheet: Amplification Data
Block Type	96alum
Chemistry	SYBR_GREEN
Experiment File Name	D:\HAIFENG\CBF910Untitled.eds
Experiment Run End Time	2013-01-10 13:02:24 PM CST
Instrument Type	sds7500
Passive Reference	ROX
Well	Cycle	Target Name	Rn	ΔRn
A1	1
A1	2
A1	3
A1	4
A1	5
A1	6
A1	7
A1	8
A1	9
A1	10
A1	11
A1	12
A1	13
A1	14
A1	15
A1	16
A1	17
A1	18
A1	19
A1	20
A1	21
A1	22
A1	23
A1	24
A1	25
A1	26
A1	27
A1	28
A1	29
A1	30
A1	31
A1	32
A1	33
A1	34
A1	35
A1	36
A1	37
A1	38
A1	39
A1	40
A2	1	CBF9	0.687707	0.00933855
A2	2	CBF9	0.683046	0.00547511
A2	3	CBF9	0.682142	0.00536807
A2	4	CBF9	0.680395	0.00441912
A2	5	CBF9	0.677737	0.00255773
A2	6	CBF9	0.675739	0.00135796
A2	7	CBF9	0.674399	0.000814676
A2	8	CBF9	0.672946	0.000159155
A2	9	CBF9	0.672022	3.25056e-05
A2	10	CBF9	0.670848	-0.000344304
A2	11	CBF9	0.669936	-0.000458377
A2	12	CBF9	0.670049	0.000451678
A2	13	CBF9	0.667947	-0.000853057
A2	14	CBF9	0.667452	-0.000550493
A2	15	CBF9	0.66574	-0.0014647
A2	16	CBF9	0.665082	-0.00132497
A2	17	CBF9	0.664034	-0.00157572
A2	18	CBF9	0.663281	-0.00153196
A2	19	CBF9	0.663459	-0.0005564
A2	20	CBF9	0.661162	-0.0020558
A2	21	CBF9	0.660415	-0.00200584
A2	22	CBF9	0.658088	-0.00353529
A2	23	CBF9	0.655894	-0.00493187
A2	24	CBF9	0.659026	-0.00100213
A2	25	CBF9	0.655372	-0.00385897
A2	26	CBF9	0.655038	-0.00339583
A2	27	CBF9	0.657819	0.000182724
A2	28	CBF9	0.656111	-0.00072725
A2	29	CBF9	0.656121	7.9331e-05
A2	30	CBF9	0.654947	-0.000296883
A2	31	CBF9	0.654523	7.6849e-05
A2	32	CBF9	0.65207	-0.0015786
A2	33	CBF9	0.652118	-0.000733574
A2	34	CBF9	0.65327	0.00121533
A2	35	CBF9	0.65259	0.00133342
A2	36	CBF9	0.653067	0.00260807
A2	37	CBF9	0.651929	0.00226715
A2	38	CBF9	0.653481	0.00461671
A2	39	CBF9	0.653309	0.00524156
A2	40	CBF9	0.650574	0.0033046
A3	1	CBF9	0.67532	-0.00517514
A3	2	CBF9	0.677621	-0.00308714
A3	3	CBF9	0.677283	-0.00363898
A3	4	CBF9	0.676552	-0.00458392
A3	5	CBF9	0.677136	-0.00421385
A3	6	CBF9	0.680463	-0.00109983
A3	7	CBF9	0.681244	-0.00053259
A3	8	CBF9	0.67896	-0.0030301
A3	9	CBF9	0.681978	-0.000225845
A3	10	CBF9	0.683873	0.00145558
A3	11	CBF9	0.683397	0.00076546
A3	12	CBF9	0.685118	0.00227314
A3	13	CBF9	0.68486	0.00180165
A3	14	CBF9	0.684429	0.00115712
A3	15	CBF9	0.684549	0.00106281
A3	16	CBF9	0.684022	0.000322676
A3	17	CBF9	0.686713	0.00280024
A3	18	CBF9	0.687428	0.00330132
A3	19	CBF9	0.687579	0.00323853
A3	20	CBF9	0.686711	0.00215681
A3	21	CBF9	0.68708	0.00231224
A3	22	CBF9	0.685284	0.000302946
A3	23	CBF9	0.68589	0.000694647
A3	24	CBF9	0.686306	0.000897462
A3	25	CBF9	0.686701	0.00107876
A3	26	CBF9	0.686646	0.000809624
A3	27	CBF9	0.68834	0.00229018
A3	28	CBF9	0.687908	0.00164506
A3	29	CBF9	0.687056	0.000579132
A3	30	CBF9	0.685881	-0.000809676
A3	31	CBF9	0.689031	0.00212667
A3	32	CBF9	0.686451	-0.000666963
A3	33	CBF9	0.685863	-0.0014689
A3	34	CBF9	0.686301	-0.00124362
A3	35	CBF9	0.68679	-0.000968563
A3	36	CBF9	0.68615	-0.001822
A3	37	CBF9	0.684436	-0.0037497
A3	38	CBF9	0.685225	-0.00317501
A3	39	CBF9	0.686771	-0.00184251
A3	40	CBF9	0.686416	-0.00241116
A4	1	CBF9	0.793482	-0.00327423
A4	2	CBF9	0.791017	-0.00580578
A4	3	CBF9	0.791458	-0.00543154
A4	4	CBF9	0.792437	-0.00451842
A4	5	CBF9	0.792048	-0.00497376
A4	6	CBF9	0.793437	-0.00365199
A4	7	CBF9	0.794752	-0.00240299
A4	8	CBF9	0.796326	-0.000895313
A4	9	CBF9	0.797349	6.12618e-05
A4	10	CBF9	0.797479	0.000124243
A4	11	CBF9	0.797731	0.00031001
A4	12	CBF9	0.797641	0.000153945
A4	13	CBF9	0.801551	0.00399723
A4	14	CBF9	0.800584	0.00296331
A4	15	CBF9	0.799552	0.00186495
A4	16	CBF9	0.800773	0.00301971
A4	17	CBF9	0.799737	0.00191713
A4	18	CBF9	0.79996	0.00207327
A4	19	CBF9	0.801887	0.00393434
A4	20	CBF9	0.802548	0.00452912
A4	21	CBF9	0.801078	0.00299261
A4	22	CBF9	0.800911	0.00275834
A4	23	CBF9	0.800083	0.00186383
A4	24	CBF9	0.79986	0.00157443
A4	25	CBF9	0.799692	0.00134076
A4	26	CBF9	0.799231	0.000812824
A4	27	CBF9	0.799584	0.00109974
A4	28	CBF9	0.798917	0.000365569
A4	29	CBF9	0.799295	0.00067728
A4	30	CBF9	0.799078	0.000394376
A4	31	CBF9	0.798749	-1.89619e-06
A4	32	CBF9	0.799844	0.0010274
A4	33	CBF9	0.79804	-0.000843257
A4	34	CBF9	0.799056	0.000106463
A4	35	CBF9	0.796589	-0.00242795
A4	36	CBF9	0.797353	-0.00172964
A4	37	CBF9	0.795983	-0.00316637
A4	38	CBF9	0.793723	-0.00549276
A4	39	CBF9	0.794856	-0.00442628
A4	40	CBF9	0.796012	-0.0033369
A5	1	CBF9	0.685903	-0.002685
A5	2	CBF9	0.685262	-0.00371614
A5	3	CBF9	0.685237	-0.00413269
A5	4	CBF9	0.686192	-0.00356803
A5	5	CBF9	0.686956	-0.00319441
A5	6	CBF9	0.687419	-0.0031231
A5	7	CBF9	0.687927	-0.00300572
A5	8	CBF9	0.689684	-0.0016389
A5	9	CBF9	0.69175	3.5954e-05
A5	10	CBF9	0.692993	0.000887787
A5	11	CBF9	0.692329	-0.000166597
A5	12	CBF9	0.695674	0.00278797
A5	13	CBF9	0.694045	0.000767393
A5	14	CBF9	0.695239	0.00157053
A5	15	CBF9	0.695409	0.00135037
A5	16	CBF9	0.696763	0.00231349
A5	17	CBF9	0.696278	0.00143774
A5	18	CBF9	0.698371	0.00313923
A5	19	CBF9	0.698154	0.00253141
A5	20	CBF9	0.698698	0.00268533
A5	21	CBF9	0.699098	0.00269453
A5	22	CBF9	0.698783	0.00198854
A5	23	CBF9	0.697936	0.000750632
A5	24	CBF9	0.698919	0.0013433
A5	25	CBF9	0.70011	0.00214286
A5	26	CBF9	0.700359	0.00200156
A5	27	CBF9	0.700557	0.00180799
A5	28	CBF9	0.700024	0.000884736
A5	29	CBF9	0.700125	0.000594663
A5	30	CBF9	0.700592	0.000671278
A5	31	CBF9	0.702338	0.00202593
A5	32	CBF9	0.700585	-0.000117366
A5	33	CBF9	0.699495	-0.00159834
A5	34	CBF9	0.700361	-0.00112369
A5	35	CBF9	0.699717	-0.00215774
A5	36	CBF9	0.699728	-0.00253824
A5	37	CBF9	0.700388	-0.00226898
A5	38	CBF9	0.700597	-0.00245057
A5	39	CBF9	0.698109	-0.00532886
A5	40	CBF9	0.69891	-0.00491947
A6	1	CBF9	0.603579	-0.00435655
A6	2	CBF9	0.605734	-0.00282072
A6	3	CBF9	0.606466	-0.00270848
A6	4	CBF9	0.606908	-0.00288544
A6	5	CBF9	0.609017	-0.0013952
A6	6	CBF9	0.61117	0.000138134
A6	7	CBF9	0.610893	-0.000757779
A6	8	CBF9	0.612062	-0.000208458
A6	9	CBF9	0.612986	9.61859e-05
A6	10	CBF9	0.614046	0.000537086
A6	11	CBF9	0.6151	0.000972085
A6	12	CBF9	0.616486	0.0017392
A6	13	CBF9	0.617289	0.00192261
A6	14	CBF9	0.61852	0.00253469
A6	15	CBF9	0.617897	0.00129248
A6	16	CBF9	0.619289	0.00206514
A6	17	CBF9	0.618952	0.00110873
A6	18	CBF9	0.618999	0.000536406
A6	19	CBF9	0.620135	0.00105282
A6	20	CBF9	0.620407	0.000705811
A6	21	CBF9	0.620213	-0.000107013
A6	22	CBF9	0.621887	0.000947934
A6	23	CBF9	0.619991	-0.00156779
A6	24	CBF9	0.621548	-0.000629494
A6	25	CBF9	0.622559	-0.000238245
A6	26	CBF9	0.622627	-0.000789822
A6	27	CBF9	0.62295	-0.00108534
A6	28	CBF9	0.622144	-0.00251072
A6	29	CBF9	0.624198	-0.00107567
A6	30	CBF9	0.626203	0.00031014
A6	31	CBF9	0.632913	0.00640019
A6	32	CBF9	0.643813	0.0166817
A6	33	CBF9	0.663911	0.0361604
A6	34	CBF9	0.700197	0.0718264
A6	35	CBF9	0.770413	0.141423
A6	36	CBF9	0.891292	0.261683
A6	37	CBF9	1.09561	0.465385
A6	38	CBF9	1.39145	0.760598
A6	39	CBF9	1.75571	1.12425
A6	40	CBF9	2.13105	1.49896
A7	1	CBF9	0.663326	-0.00664446
A7	2	CBF9	0.66563	-0.00503701
A7	3	CBF9	0.667925	-0.00343749
A7	4	CBF9	0.668017	-0.00404166
A7	5	CBF9	0.670505	-0.00224938
A7	6	CBF9	0.672146	-0.00130479
A7	7	CBF9	0.675264	0.0011174
A7	8	CBF9	0.674958	0.000115123
A7	9	CBF9	0.676616	0.00107759
A7	10	CBF9	0.679222	0.00298736
A7	11	CBF9	0.678219	0.00128878
A7	12	CBF9	0.678988	0.00136171
A7	13	CBF9	0.681089	0.00276681
A7	14	CBF9	0.681467	0.00244909
A7	15	CBF9	0.681869	0.00215498
A7	16	CBF9	0.681782	0.00137151
A7	17	CBF9	0.68334	0.0022339
A7	18	CBF9	0.683542	0.00173969
A7	19	CBF9	0.682577	7.86068e-05
A7	20	CBF9	0.683633	0.000439071
A7	21	CBF9	0.68391	2.02632e-05
A7	22	CBF9	0.683199	-0.00138733
A7	23	CBF9	0.683933	-0.00134914
A7	24	CBF9	0.685063	-0.000914592
A7	25	CBF9	0.683794	-0.00287966
A7	26	CBF9	0.683635	-0.00373507
A7	27	CBF9	0.685498	-0.00256822
A7	28	CBF9	0.686968	-0.00179386
A7	29	CBF9	0.688855	-0.000603045
A7	30	CBF9	0.695216	0.00506235
A7	31	CBF9	0.704752	0.0139026
A7	32	CBF9	0.725003	0.0334572
A7	33	CBF9	0.76222	0.0699788
A7	34	CBF9	0.833445	0.140507
A7	35	CBF9	0.959653	0.26602
A7	36	CBF9	1.16274	0.468407
A7	37	CBF9	1.46253	0.767507
A7	38	CBF9	1.83104	1.13532
A7	39	CBF9	2.20806	1.51165
A7	40	CBF9	2.52171	1.82459
A8	1	CBF10	0.803482	0.00488897
A8	2	CBF10	0.800582	0.000980306
A8	3	CBF10	0.800485	-0.000124799
A8	4	CBF10	0.799907	-0.00171133
A8	5	CBF10	0.801474	-0.00115281
A8	6	CBF10	0.803548	-8.82472e-05
A8	7	CBF10	0.804672	2.78873e-05
A8	8	CBF10	0.806765	0.00111176
A8	9	CBF10	0.807144	0.000482482
A8	10	CBF10	0.808672	0.00100148
A8	11	CBF10	0.809964	0.00128427
A8	12	CBF10	0.810954	0.00126564
A8	13	CBF10	0.81256	0.00186332
A8	14	CBF10	0.812181	0.000475512
A8	15	CBF10	0.81254	-0.000174094
A8	16	CBF10	0.813286	-0.000436628
A8	17	CBF10	0.814175	-0.000556647
A8	18	CBF10	0.812658	-0.00308225
A8	19	CBF10	0.815596	-0.00115241
A8	20	CBF10	0.815835	-0.00192229
A8	21	CBF10	0.817573	-0.00119313
A8	22	CBF10	0.823857	0.00408227
A8	23	CBF10	0.829775	0.00899199
A8	24	CBF10	0.846031	0.0242393
A8	25	CBF10	0.874572	0.0517709
A8	26	CBF10	0.930315	0.106506
A8	27	CBF10	1.02913	0.204311
A8	28	CBF10	1.19664	0.37081
A8	29	CBF10	1.45153	0.624694
A8	30	CBF10	1.77215	0.944306
A8	31	CBF10	2.09729	1.26844
A8	32	CBF10	2.35506	1.52519
A8	33	CBF10	2.55348	1.72261
A8	34	CBF10	2.71571	1.88383
A8	35	CBF10	2.85288	2.02
A8	36	CBF10	2.96086	2.12696
A8	37	CBF10	3.05703	2.22212
A8	38	CBF10	3.13002	2.2941
A8	39	CBF10	3.19012	2.3532
A8	40	CBF10	3.2441	2.40617
A9	1	CBF10	0.763982	0.00937325
A9	2	CBF10	0.759527	0.00373315
A9	3	CBF10	0.757928	0.000948714
A9	4	CBF10	0.758377	0.000211994
A9	5	CBF10	0.758574	-0.000776794
A9	6	CBF10	0.759674	-0.00086275
A9	7	CBF10	0.760518	-0.00120381
A9	8	CBF10	0.762403	-0.000504478
A9	9	CBF10	0.763881	-0.000212779
A9	10	CBF10	0.766465	0.00118602
A9	11	CBF10	0.767633	0.00116813
A9	12	CBF10	0.768806	0.00115525
A9	13	CBF10	0.769889	0.00105314
A9	14	CBF10	0.770546	0.000523725
A9	15	CBF10	0.770918	-0.000289527
A9	16	CBF10	0.771853	-0.000540647
A9	17	CBF10	0.772599	-0.000979582
A9	18	CBF10	0.773924	-0.00084059
A9	19	CBF10	0.775113	-0.000837556
A9	20	CBF10	0.775566	-0.00156939
A9	21	CBF10	0.778256	-6.58077e-05
A9	22	CBF10	0.781944	0.00243675
A9	23	CBF10	0.79008	0.00938754
A9	24	CBF10	0.804825	0.0229465
A9	25	CBF10	0.832428	0.0493642
A9	26	CBF10	0.886989	0.102739
A9	27	CBF10	0.987824	0.202388
A9	28	CBF10	1.15558	0.36896
A9	29	CBF10	1.41292	0.625116
A9	30	CBF10	1.75094	0.961943
A9	31	CBF10	2.11163	1.32145
A9	32	CBF10	2.4029	1.61153
A9	33	CBF10	2.62754	1.83499
A9	34	CBF10	2.8102	2.01647
A9	35	CBF10	2.96791	2.17298
A9	36	CBF10	3.08082	2.28471
A9	37	CBF10	3.18602	2.38873
A9	38	CBF10	3.27043	2.47195
A9	39	CBF10	3.34119	2.54153
A9	40	CBF10	3.40089	2.60005
A10	1	CBF10	0.88888	0.00100429
A10	2	CBF10	0.887607	-0.0010516
A10	3	CBF10	0.890316	0.0008744
A10	4	CBF10	0.889928	-0.000297614
A10	5	CBF10	0.888933	-0.00207515
A10	6	CBF10	0.888979	-0.00281181
A10	7	CBF10	0.892689	0.000114886
A10	8	CBF10	0.89392	0.00056245
A10	9	CBF10	0.896048	0.0019082
A10	10	CBF10	0.896684	0.00176055
A10	11	CBF10	0.89708	0.00137329
A10	12	CBF10	0.89685	0.000360299
A10	13	CBF10	0.899183	0.00191085
A10	14	CBF10	0.898769	0.000713441
A10	15	CBF10	0.89832	-0.000518953
A10	16	CBF10	0.899878	0.000256079
A10	17	CBF10	0.89849	-0.00191419
A10	18	CBF10	0.899064	-0.00212407
A10	19	CBF10	0.899864	-0.00210643
A10	20	CBF10	0.901555	-0.0011986
A10	21	CBF10	0.904282	0.000744977
A10	22	CBF10	0.906787	0.00246742
A10	23	CBF10	0.915925	0.0108221
A10	24	CBF10	0.929182	0.0232965
A10	25	CBF10	0.95567	0.0490015
A10	26	CBF10	1.00927	0.101821
A10	27	CBF10	1.1014	0.193162
A10	28	CBF10	1.26144	0.352427
A10	29	CBF10	1.50416	0.594355
A10	30	CBF10	1.82376	0.91318
A10	31	CBF10	2.15159	1.24022
A10	32	CBF10	2.42204	1.50989
A10	33	CBF10	2.61863	1.7057
A10	34	CBF10	2.79009	1.87637
A10	35	CBF10	2.93779	2.02329
A10	36	CBF10	3.04332	2.12803
A10	37	CBF10	3.1349	2.21884
A10	38	CBF10	3.20828	2.29144
A10	39	CBF10	3.27081	2.35318
A10	40	CBF10	3.33227	2.41386
A11	1
A11	2
A11	3
A11	4
A11	5
A11	6
A11	7
A11	8
A11	9
A11	10
A11	11
A11	12
A11	13
A11	14
A11	15
A11	16
A11	17
A11	18
A11	19
A11	20
A11	21
A11	22
A11	23
A11	24
A11	25
A11	26
A11	27
A11	28
A11	29
A11	30
A11	31
A11	32
A11	33
A11	34
A11	35
A11	36
A11	37
A11	38
A11	39
A11	40
A12	1
A12	2
A12	3
A12	4
A12	5
A12	6
A12	7
A12	8
A12	9
A12	10
A12	11
A12	12
A12	13
A12	14
A12	15
A12	16
A12	17
A12	18
A12	19
A12	20
A12	21
A12	22
A12	23
A12	24
A12	25
A12	26
A12	27
A12	28
A12	29
A12	30
A12	31
A12	32
A12	33
A12	34
A12	35
A12	36
A12	37
A12	38
A12	39
A12	40
B1	1
B1	2
B1	3
B1	4
B1	5
B1	6
B1	7
B1	8
B1	9
B1	10
B1	11
B1	12
B1	13
B1	14
B1	15
B1	16
B1	17
B1	18
B1	19
B1	20
B1	21
B1	22
B1	23
B1	24
B1	25
B1	26
B1	27
B1	28
B1	29
B1	30
B1	31
B1	32
B1	33
B1	34
B1	35
B1	36
B1	37
B1	38
B1	39
B1	40
B2	1	CBF9	0.699428	-0.0028954
B2	2	CBF9	0.700642	-0.0016604
B2	3	CBF9	0.698815	-0.00346696
B2	4	CBF9	0.696817	-0.00544369
B2	5	CBF9	0.698841	-0.0033995
B2	6	CBF9	0.698104	-0.00411529
B2	7	CBF9	0.700264	-0.00193526
B2	8	CBF9	0.698672	-0.00350674
B2	9	CBF9	0.702256	9.86805e-05
B2	10	CBF9	0.702811	0.00067386
B2	11	CBF9	0.702878	0.000762071
B2	12	CBF9	0.703973	0.00187786
B2	13	CBF9	0.704481	0.00240584
B2	14	CBF9	0.702938	0.000883531
B2	15	CBF9	0.703413	0.0013792
B2	16	CBF9	0.706016	0.00400347
B2	17	CBF9	0.704103	0.0021103
B2	18	CBF9	0.704962	0.00299018
B2	19	CBF9	0.705602	0.00365089
B2	20	CBF9	0.704654	0.00272397
B2	21	CBF9	0.70586	0.0039501
B2	22	CBF9	0.704951	0.0030618
B2	23	CBF9	0.704146	0.00227818
B2	24	CBF9	0.703	0.0011529
B2	25	CBF9	0.704087	0.00225987
B2	26	CBF9	0.703496	0.00169004
B2	27	CBF9	0.702817	0.00103123
B2	28	CBF9	0.702807	0.00104219
B2	29	CBF9	0.701865	0.000121235
B2	30	CBF9	0.70189	0.000166172
B2	31	CBF9	0.701314	-0.000388991
B2	32	CBF9	0.700065	-0.00161727
B2	33	CBF9	0.700663	-0.00099816
B2	34	CBF9	0.699713	-0.00192776
B2	35	CBF9	0.698609	-0.00301102
B2	36	CBF9	0.699364	-0.00223563
B2	37	CBF9	0.698745	-0.00283406
B2	38	CBF9	0.697993	-0.0035647
B2	39	CBF9	0.699669	-0.00186854
B2	40	CBF9	0.696883	-0.00463336
B3	1	CBF9	0.617469	-0.00704792
B3	2	CBF9	0.619164	-0.00581193
B3	3	CBF9	0.619856	-0.00557927
B3	4	CBF9	0.621591	-0.00430317
B3	5	CBF9	0.622528	-0.00382524
B3	6	CBF9	0.625607	-0.00120612
B3	7	CBF9	0.627098	-0.000173565
B3	8	CBF9	0.627773	4.13349e-05
B3	9	CBF9	0.627195	-0.000994985
B3	10	CBF9	0.628599	-5.08224e-05
B3	11	CBF9	0.629509	0.000399814
B3	12	CBF9	0.631327	0.00175841
B3	13	CBF9	0.632289	0.00226191
B3	14	CBF9	0.633734	0.0032475
B3	15	CBF9	0.631785	0.000839143
B3	16	CBF9	0.632343	0.000938351
B3	17	CBF9	0.633865	0.00200023
B3	18	CBF9	0.633948	0.00162481
B3	19	CBF9	0.6343	0.00151772
B3	20	CBF9	0.634598	0.00135574
B3	21	CBF9	0.636441	0.00274021
B3	22	CBF9	0.636187	0.00202677
B3	23	CBF9	0.636798	0.00217801
B3	24	CBF9	0.636317	0.00123843
B3	25	CBF9	0.636851	0.0013126
B3	26	CBF9	0.638345	0.00234814
B3	27	CBF9	0.63898	0.00252334
B3	28	CBF9	0.63864	0.00172389
B3	29	CBF9	0.63721	-0.000165434
B3	30	CBF9	0.638689	0.000854427
B3	31	CBF9	0.638365	7.11881e-05
B3	32	CBF9	0.635538	-0.00321425
B3	33	CBF9	0.637441	-0.00177048
B3	34	CBF9	0.637058	-0.00261327
B3	35	CBF9	0.639413	-0.000716981
B3	36	CBF9	0.638866	-0.00172314
B3	37	CBF9	0.638939	-0.00211013
B3	38	CBF9	0.640292	-0.00121615
B3	39	CBF9	0.638628	-0.00333895
B3	40	CBF9	0.638387	-0.0040391
B4	1	CBF9	0.760939	-0.00609022
B4	2	CBF9	0.761255	-0.00608436
B4	3	CBF9	0.761752	-0.00589598
B4	4	CBF9	0.76256	-0.00539772
B4	5	CBF9	0.764197	-0.0040697
B4	6	CBF9	0.764649	-0.00392704
B4	7	CBF9	0.767057	-0.00182833
B4	8	CBF9	0.767324	-0.00187086
B4	9	CBF9	0.768807	-0.000697753
B4	10	CBF9	0.769722	-9.17851e-05
B4	11	CBF9	0.771395	0.00127229
B4	12	CBF9	0.772278	0.00184596
B4	13	CBF9	0.773847	0.00310513
B4	14	CBF9	0.77407	0.00301933
B4	15	CBF9	0.774417	0.00305703
B4	16	CBF9	0.775329	0.00365924
B4	17	CBF9	0.773432	0.00145282
B4	18	CBF9	0.776391	0.00410329
B4	19	CBF9	0.774925	0.00232739
B4	20	CBF9	0.774966	0.00205914
B4	21	CBF9	0.77662	0.00340367
B4	22	CBF9	0.775381	0.00185553
B4	23	CBF9	0.776328	0.00249356
B4	24	CBF9	0.776098	0.00195405
B4	25	CBF9	0.776109	0.00165569
B4	26	CBF9	0.776397	0.0016345
B4	27	CBF9	0.77685	0.00177782
B4	28	CBF9	0.777288	0.00190659
B4	29	CBF9	0.775995	0.000304148
B4	30	CBF9	0.776414	0.000414384
B4	31	CBF9	0.77592	-0.000389537
B4	32	CBF9	0.776386	-0.000232928
B4	33	CBF9	0.775243	-0.00168529
B4	34	CBF9	0.776097	-0.00114018
B4	35	CBF9	0.775741	-0.00180605
B4	36	CBF9	0.77483	-0.00302643
B4	37	CBF9	0.774247	-0.00391821
B4	38	CBF9	0.77387	-0.00460477
B4	39	CBF9	0.776065	-0.00271903
B4	40	CBF9	0.774154	-0.00493909
B5	1	CBF9	0.518858	0.000375681
B5	2	CBF9	0.520896	0.00165597
B5	3	CBF9	0.519573	-0.000424664
B5	4	CBF9	0.521447	0.000691237
B5	5	CBF9	0.521402	-0.000111833
B5	6	CBF9	0.522609	0.000338045
B5	7	CBF9	0.52313	0.000100742
B5	8	CBF9	0.524388	0.000601166
B5	9	CBF9	0.524469	-7.55426e-05
B5	10	CBF9	0.52417	-0.00113265
B5	11	CBF9	0.526093	3.22482e-05
B5	12	CBF9	0.526753	-6.51032e-05
B5	13	CBF9	0.527637	6.0884e-05
B5	14	CBF9	0.529402	0.0010683
B5	15	CBF9	0.529442	0.00035029
B5	16	CBF9	0.530682	0.000831819
B5	17	CBF9	0.531324	0.000716169
B5	18	CBF9	0.532007	0.000641408
B5	19	CBF9	0.531926	-0.000197187
B5	20	CBF9	0.532368	-0.000512691
B5	21	CBF9	0.532819	-0.000819613
B5	22	CBF9	0.532944	-0.00145233
B5	23	CBF9	0.533825	-0.00132915
B5	24	CBF9	0.534043	-0.00186936
B5	25	CBF9	0.535971	-0.000698922
B5	26	CBF9	0.536434	-0.000994339
B5	27	CBF9	0.537457	-0.000729295
B5	28	CBF9	0.539725	0.000780832
B5	29	CBF9	0.540009	0.000307017
B5	30	CBF9	0.544352	0.00389252
B5	31	CBF9	0.551401	0.0101839
B5	32	CBF9	0.564891	0.0229157
B5	33	CBF9	0.588435	0.0457017
B5	34	CBF9	0.630878	0.0873877
B5	35	CBF9	0.702488	0.15824
B5	36	CBF9	0.807941	0.262935
B5	37	CBF9	0.94457	0.398805
B5	38	CBF9	1.11916	0.572641
B5	39	CBF9	1.31656	0.769276
B5	40	CBF9	1.50664	0.9586
B6	1	CBF9	0.464728	-0.00242219
B6	2	CBF9	0.466322	-0.00169805
B6	3	CBF9	0.467535	-0.00135618
B6	4	CBF9	0.468431	-0.00133067
B6	5	CBF9	0.469185	-0.0014474
B6	6	CBF9	0.470761	-0.000742451
B6	7	CBF9	0.472474	0.000100452
B6	8	CBF9	0.473185	-5.90168e-05
B6	9	CBF9	0.474992	0.000877197
B6	10	CBF9	0.475983	0.000997334
B6	11	CBF9	0.476859	0.00100208
B6	12	CBF9	0.477854	0.00112719
B6	13	CBF9	0.478857	0.00125898
B6	14	CBF9	0.479842	0.00137366
B6	15	CBF9	0.479988	0.000648575
B6	16	CBF9	0.48159	0.00138034
B6	17	CBF9	0.481688	0.000607455
B6	18	CBF9	0.483221	0.00127014
B6	19	CBF9	0.482222	-0.000599711
B6	20	CBF9	0.483744	5.18009e-05
B6	21	CBF9	0.484288	-0.000275544
B6	22	CBF9	0.484257	-0.00117694
B6	23	CBF9	0.486279	-2.51977e-05
B6	24	CBF9	0.48736	0.000184972
B6	25	CBF9	0.486712	-0.00133357
B6	26	CBF9	0.486631	-0.00228528
B6	27	CBF9	0.487635	-0.002152
B6	28	CBF9	0.488123	-0.00253442
B6	29	CBF9	0.490886	-0.000642949
B6	30	CBF9	0.493434	0.00103469
B6	31	CBF9	0.497316	0.00404645
B6	32	CBF9	0.503689	0.00954797
B6	33	CBF9	0.51648	0.0214683
B6	34	CBF9	0.537491	0.0416091
B6	35	CBF9	0.578407	0.0816544
B6	36	CBF9	0.643295	0.145672
B6	37	CBF9	0.743118	0.244624
B6	38	CBF9	0.883987	0.384622
B6	39	CBF9	1.05951	0.559279
B6	40	CBF9	1.26115	0.760047
B7	1	CBF9	0.497563	-0.00457082
B7	2	CBF9	0.499919	-0.00303125
B7	3	CBF9	0.50016	-0.00360704
B7	4	CBF9	0.503294	-0.00128902
B7	5	CBF9	0.503564	-0.00183549
B7	6	CBF9	0.505131	-0.00108532
B7	7	CBF9	0.506297	-0.000735867
B7	8	CBF9	0.508709	0.000859321
B7	9	CBF9	0.510254	0.00158822
B7	10	CBF9	0.510522	0.00103871
B7	11	CBF9	0.510846	0.000546841
B7	12	CBF9	0.513306	0.00219007
B7	13	CBF9	0.513262	0.00132919
B7	14	CBF9	0.514091	0.0013417
B7	15	CBF9	0.514463	0.00089763
B7	16	CBF9	0.516435	0.00205228
B7	17	CBF9	0.516062	0.000863395
B7	18	CBF9	0.517815	0.001799
B7	19	CBF9	0.51829	0.00145799
B7	20	CBF9	0.517867	0.000218141
B7	21	CBF9	0.517945	-0.000520252
B7	22	CBF9	0.519932	0.000649776
B7	23	CBF9	0.519722	-0.000377044
B7	24	CBF9	0.519339	-0.00157612
B7	25	CBF9	0.520881	-0.000850327
B7	26	CBF9	0.520758	-0.0017906
B7	27	CBF9	0.522655	-0.000710218
B7	28	CBF9	0.52241	-0.00177185
B7	29	CBF9	0.521693	-0.00330555
B7	30	CBF9	0.52411	-0.00170446
B7	31	CBF9	0.52689	0.000258254
B7	32	CBF9	0.531517	0.00406865
B7	33	CBF9	0.538524	0.0102596
B7	34	CBF9	0.553105	0.0240241
B7	35	CBF9	0.579974	0.0500758
B7	36	CBF9	0.6267	0.0959855
B7	37	CBF9	0.700971	0.16944
B7	38	CBF9	0.811579	0.279231
B7	39	CBF9	0.964158	0.430994
B7	40	CBF9	1.15048	0.616496
B8	1	CBF10	0.830907	0.00128847
B8	2	CBF10	0.830749	0.000471384
B8	3	CBF10	0.829205	-0.00173228
B8	4	CBF10	0.828736	-0.00286039
B8	5	CBF10	0.830151	-0.00210421
B8	6	CBF10	0.832359	-0.000555642
B8	7	CBF10	0.834808	0.00123414
B8	8	CBF10	0.835865	0.00163257
B8	9	CBF10	0.83691	0.00201789
B8	10	CBF10	0.836863	0.00131203
B8	11	CBF10	0.838449	0.0022385
B8	12	CBF10	0.839145	0.00227591
B8	13	CBF10	0.838341	0.000811994
B8	14	CBF10	0.839081	0.000893032
B8	15	CBF10	0.840078	0.00123168
B8	16	CBF10	0.838464	-0.00104196
B8	17	CBF10	0.839409	-0.000756302
B8	18	CBF10	0.839143	-0.00168151
B8	19	CBF10	0.840137	-0.00134679
B8	20	CBF10	0.841434	-0.000708394
B8	21	CBF10	0.841345	-0.00145664
B8	22	CBF10	0.842991	-0.000470143
B8	23	CBF10	0.845186	0.0010665
B8	24	CBF10	0.852078	0.00729874
B8	25	CBF10	0.864505	0.0190672
B8	26	CBF10	0.886006	0.0399084
B8	27	CBF10	0.931566	0.0848096
B8	28	CBF10	1.01568	0.168267
B8	29	CBF10	1.15897	0.310893
B8	30	CBF10	1.3772	0.528463
B8	31	CBF10	1.66844	0.819052
B8	32	CBF10	1.96122	1.11116
B8	33	CBF10	2.20981	1.3591
B8	34	CBF10	2.39198	1.54061
B8	35	CBF10	2.54021	1.68818
B8	36	CBF10	2.6633	1.81061
B8	37	CBF10	2.75505	1.90171
B8	38	CBF10	2.83504	1.98103
B8	39	CBF10	2.90017	2.0455
B8	40	CBF10	2.95905	2.10373
B9	1	CBF10	0.78761	0.0111192
B9	2	CBF10	0.781579	0.00423357
B9	3	CBF10	0.779082	0.000882393
B9	4	CBF10	0.779407	0.000352601
B9	5	CBF10	0.779118	-0.000792012
B9	6	CBF10	0.778696	-0.00206817
B9	7	CBF10	0.781692	7.23241e-05
B9	8	CBF10	0.783301	0.000826596
B9	9	CBF10	0.782986	-0.000343052
B9	10	CBF10	0.784376	0.000192113
B9	11	CBF10	0.784567	-0.000471014
B9	12	CBF10	0.786699	0.000805752
B9	13	CBF10	0.789105	0.00235736
B9	14	CBF10	0.789107	0.00150415
B9	15	CBF10	0.788783	0.00032568
B9	16	CBF10	0.788395	-0.000917519
B9	17	CBF10	0.789217	-0.000949969
B9	18	CBF10	0.790168	-0.000854448
B9	19	CBF10	0.78991	-0.00196682
B9	20	CBF10	0.791558	-0.00117362
B9	21	CBF10	0.792927	-0.000659557
B9	22	CBF10	0.794433	-8.52068e-06
B9	23	CBF10	0.798182	0.00288574
B9	24	CBF10	0.802846	0.00669516
B9	25	CBF10	0.816072	0.0190656
B9	26	CBF10	0.838161	0.0403006
B9	27	CBF10	0.883767	0.085051
B9	28	CBF10	0.966371	0.166801
B9	29	CBF10	1.10643	0.306002
B9	30	CBF10	1.32638	0.525102
B9	31	CBF10	1.63445	0.832316
B9	32	CBF10	1.97251	1.16952
B9	33	CBF10	2.26511	1.46127
B9	34	CBF10	2.47625	1.67155
B9	35	CBF10	2.65686	1.8513
B9	36	CBF10	2.80437	1.99796
B9	37	CBF10	2.91622	2.10896
B9	38	CBF10	3.01195	2.20383
B9	39	CBF10	3.09609	2.28711
B9	40	CBF10	3.16325	2.35342
B10	1	CBF10	0.829802	0.00174296
B10	2	CBF10	0.829231	0.00046354
B10	3	CBF10	0.828272	-0.00120355
B10	4	CBF10	0.827867	-0.00231752
B10	5	CBF10	0.829609	-0.00128398
B10	6	CBF10	0.831334	-0.000266961
B10	7	CBF10	0.83308	0.000770089
B10	8	CBF10	0.83447	0.0014516
B10	9	CBF10	0.833735	8.61723e-06
B10	10	CBF10	0.835081	0.000646078
B10	11	CBF10	0.836976	0.0018322
B10	12	CBF10	0.837831	0.00197935
B10	13	CBF10	0.838712	0.00215195
B10	14	CBF10	0.837919	0.000649906
B10	15	CBF10	0.83762	-0.000357245
B10	16	CBF10	0.838521	-0.000164614
B10	17	CBF10	0.839189	-0.000204858
B10	18	CBF10	0.840117	1.38792e-05
B10	19	CBF10	0.839768	-0.00104286
B10	20	CBF10	0.839517	-0.00200227
B10	21	CBF10	0.841782	-0.000446005
B10	22	CBF10	0.841188	-0.00174879
B10	23	CBF10	0.84518	0.00153499
B10	24	CBF10	0.851389	0.00703583
B10	25	CBF10	0.861908	0.0168456
B10	26	CBF10	0.881672	0.0359011
B10	27	CBF10	0.923457	0.0769782
B10	28	CBF10	0.997577	0.15039
B10	29	CBF10	1.12525	0.277358
B10	30	CBF10	1.32859	0.479981
B10	31	CBF10	1.60283	0.753513
B10	32	CBF10	1.90603	1.056
B10	33	CBF10	2.17087	1.32014
B10	34	CBF10	2.37127	1.51983
B10	35	CBF10	2.53645	1.68431
B10	36	CBF10	2.67163	1.81877
B10	37	CBF10	2.77664	1.92308
B10	38	CBF10	2.86712	2.01285
B10	39	CBF10	2.94231	2.08733
B10	40	CBF10	3.00608	2.15039
B11	1
B11	2
B11	3
B11	4
B11	5
B11	6
B11	7
B11	8
B11	9
B11	10
B11	11
B11	12
B11	13
B11	14
B11	15
B11	16
B11	17
B11	18
B11	19
B11	20
B11	21
B11	22
B11	23
B11	24
B11	25
B11	26
B11	27
B11	28
B11	29
B11	30
B11	31
B11	32
B11	33
B11	34
B11	35
B11	36
B11	37
B11	38
B11	39
B11	40
B12	1
B12	2
B12	3
B12	4
B12	5
B12	6
B12	7
B12	8
B12	9
B12	10
B12	11
B12	12
B12	13
B12	14
B12	15
B12	16
B12	17
B12	18
B12	19
B12	20
B12	21
B12	22
B12	23
B12	24
B12	25
B12	26
B12	27
B12	28
B12	29
B12	30
B12	31
B12	32
B12	33
B12	34
B12	35
B12	36
B12	37
B12	38
B12	39
B12	40
C1	1
C1	2
C1	3
C1	4
C1	5
C1	6
C1	7
C1	8
C1	9
C1	10
C1	11
C1	12
C1	13
C1	14
C1	15
C1	16
C1	17
C1	18
C1	19
C1	20
C1	21
C1	22
C1	23
C1	24
C1	25
C1	26
C1	27
C1	28
C1	29
C1	30
C1	31
C1	32
C1	33
C1	34
C1	35
C1	36
C1	37
C1	38
C1	39
C1	40
C2	1	CBF9	0.692841	-0.00463069
C2	2	CBF9	0.693709	-0.00397471
C2	3	CBF9	0.69426	-0.00363535
C2	4	CBF9	0.693717	-0.00438926
C2	5	CBF9	0.693345	-0.00497306
C2	6	CBF9	0.693744	-0.00478492
C2	7	CBF9	0.697052	-0.00168843
C2	8	CBF9	0.697247	-0.00170456
C2	9	CBF9	0.698821	-0.000342325
C2	10	CBF9	0.700865	0.00149049
C2	11	CBF9	0.700314	0.000728291
C2	12	CBF9	0.701724	0.00192673
C2	13	CBF9	0.70311	0.00310168
C2	14	CBF9	0.702403	0.00218332
C2	15	CBF9	0.702774	0.00234208
C2	16	CBF9	0.702768	0.00212461
C2	17	CBF9	0.703006	0.0021517
C2	18	CBF9	0.703689	0.00262302
C2	19	CBF9	0.705244	0.00396731
C2	20	CBF9	0.70326	0.00177121
C2	21	CBF9	0.704021	0.00232145
C2	22	CBF9	0.704671	0.00276017
C2	23	CBF9	0.704894	0.00277152
C2	24	CBF9	0.703729	0.00139474
C2	25	CBF9	0.704885	0.00233968
C2	26	CBF9	0.704193	0.00143598
C2	27	CBF9	0.704301	0.00133254
C2	28	CBF9	0.703681	0.000501022
C2	29	CBF9	0.70287	-0.000520573
C2	30	CBF9	0.702686	-0.000916618
C2	31	CBF9	0.7023	-0.00151377
C2	32	CBF9	0.703288	-0.000737569
C2	33	CBF9	0.702784	-0.00145238
C2	34	CBF9	0.70204	-0.00240752
C2	35	CBF9	0.703299	-0.00135999
C2	36	CBF9	0.702892	-0.0019786
C2	37	CBF9	0.70332	-0.00176239
C2	38	CBF9	0.702039	-0.00325498
C2	39	CBF9	0.70366	-0.00184524
C2	40	CBF9	0.705272	-0.000443849
C3	1	CBF9	0.624566	-0.00578594
C3	2	CBF9	0.626465	-0.00444852
C3	3	CBF9	0.627512	-0.00396296
C3	4	CBF9	0.627421	-0.00461597
C3	5	CBF9	0.627402	-0.00519632
C3	6	CBF9	0.630525	-0.00263497
C3	7	CBF9	0.632439	-0.00128276
C3	8	CBF9	0.632789	-0.0014938
C3	9	CBF9	0.6349	5.54082e-05
C3	10	CBF9	0.636994	0.00158757
C3	11	CBF9	0.635752	-0.000215933
C3	12	CBF9	0.637315	0.000784849
C3	13	CBF9	0.63852	0.00142836
C3	14	CBF9	0.640385	0.00273187
C3	15	CBF9	0.640873	0.00265882
C3	16	CBF9	0.640329	0.00155275
C3	17	CBF9	0.640895	0.00155683
C3	18	CBF9	0.643051	0.00315115
C3	19	CBF9	0.643392	0.0029304
C3	20	CBF9	0.643164	0.00214089
C3	21	CBF9	0.645626	0.00404158
C3	22	CBF9	0.642867	0.000720612
C3	23	CBF9	0.644751	0.0020435
C3	24	CBF9	0.644874	0.00160471
C3	25	CBF9	0.643912	8.05769e-05
C3	26	CBF9	0.646202	0.00180889
C3	27	CBF9	0.646675	0.00172028
C3	28	CBF9	0.646407	0.00089108
C3	29	CBF9	0.647245	0.00116749
C3	30	CBF9	0.648187	0.0015482
C3	31	CBF9	0.648086	0.000885
C3	32	CBF9	0.647653	-0.000109842
C3	33	CBF9	0.646658	-0.00166562
C3	34	CBF9	0.647369	-0.00151653
C3	35	CBF9	0.64848	-0.000966958
C3	36	CBF9	0.646571	-0.00343791
C3	37	CBF9	0.647234	-0.00333662
C3	38	CBF9	0.648484	-0.00264823
C3	39	CBF9	0.647687	-0.00400642
C3	40	CBF9	0.648276	-0.00397952
C4	1	CBF9	0.723692	-0.00808868
C4	2	CBF9	0.723748	-0.00856981
C4	3	CBF9	0.724976	-0.00787941
C4	4	CBF9	0.727472	-0.00592063
C4	5	CBF9	0.727879	-0.0060505
C4	6	CBF9	0.730007	-0.00445948
C4	7	CBF9	0.731964	-0.0030397
C4	8	CBF9	0.734843	-0.000697713
C4	9	CBF9	0.735583	-0.00049482
C4	10	CBF9	0.738527	0.00191291
C4	11	CBF9	0.739263	0.00211127
C4	12	CBF9	0.740576	0.00288756
C4	13	CBF9	0.741213	0.00298746
C4	14	CBF9	0.742376	0.00361336
C4	15	CBF9	0.742687	0.00338746
C4	16	CBF9	0.742653	0.00281585
C4	17	CBF9	0.742906	0.00253273
C4	18	CBF9	0.744042	0.00313098
C4	19	CBF9	0.743921	0.00247366
C4	20	CBF9	0.74452	0.00253541
C4	21	CBF9	0.745459	0.00293726
C4	22	CBF9	0.746073	0.00301403
C4	23	CBF9	0.746198	0.00260162
C4	24	CBF9	0.746989	0.0028556
C4	25	CBF9	0.747945	0.00327539
C4	26	CBF9	0.747082	0.00187468
C4	27	CBF9	0.747424	0.00167971
C4	28	CBF9	0.747633	0.00135171
C4	29	CBF9	0.747514	0.000696057
C4	30	CBF9	0.747535	0.000179581
C4	31	CBF9	0.747264	-0.000628659
C4	32	CBF9	0.747936	-0.000493417
C4	33	CBF9	0.746972	-0.00199391
C4	34	CBF9	0.749139	-0.000364316
C4	35	CBF9	0.747966	-0.00207431
C4	36	CBF9	0.748194	-0.00238372
C4	37	CBF9	0.747024	-0.00409021
C4	38	CBF9	0.746913	-0.00473817
C4	39	CBF9	0.746643	-0.00554534
C4	40	CBF9	0.746837	-0.0058889
C5	1	CBF9	0.671473	-1.44283e-05
C5	2	CBF9	0.670323	-0.00137894
C5	3	CBF9	0.671386	-0.000530803
C5	4	CBF9	0.671411	-0.000719789
C5	5	CBF9	0.669997	-0.00234841
C5	6	CBF9	0.671506	-0.00105443
C5	7	CBF9	0.672317	-0.000458244
C5	8	CBF9	0.673621	0.000630872
C5	9	CBF9	0.674206	0.00100193
C5	10	CBF9	0.673565	0.000146148
C5	11	CBF9	0.675881	0.00224681
C5	12	CBF9	0.675041	0.00119201
C5	13	CBF9	0.675538	0.00147491
C5	14	CBF9	0.675671	0.00139316
C5	15	CBF9	0.675539	0.00104675
C5	16	CBF9	0.67427	-0.000437322
C5	17	CBF9	0.676402	0.00147982
C5	18	CBF9	0.675047	-8.95481e-05
C5	19	CBF9	0.675591	0.000240026
C5	20	CBF9	0.674098	-0.00146763
C5	21	CBF9	0.674844	-0.000936351
C5	22	CBF9	0.673776	-0.00221962
C5	23	CBF9	0.674443	-0.00176744
C5	24	CBF9	0.674652	-0.00177314
C5	25	CBF9	0.676577	-6.21093e-05
C5	26	CBF9	0.679866	0.00301238
C5	27	CBF9	0.685727	0.00865785
C5	28	CBF9	0.698408	0.0211251
C5	29	CBF9	0.723315	0.0458171
C5	30	CBF9	0.767999	0.0902864
C5	31	CBF9	0.848626	0.170699
C5	32	CBF9	0.984199	0.306057
C5	33	CBF9	1.18483	0.506474
C5	34	CBF9	1.44048	0.761908
C5	35	CBF9	1.70812	1.02934
C5	36	CBF9	1.94112	1.26212
C5	37	CBF9	2.12446	1.44524
C5	38	CBF9	2.25592	1.57649
C5	39	CBF9	2.35738	1.67774
C5	40	CBF9	2.43193	1.75207
C6	1	CBF9	0.593198	-0.0054057
C6	2	CBF9	0.595862	-0.00332378
C6	3	CBF9	0.59949	-0.000277032
C6	4	CBF9	0.599044	-0.00130492
C6	5	CBF9	0.599883	-0.00104743
C6	6	CBF9	0.601197	-0.000315492
C6	7	CBF9	0.601504	-0.000590691
C6	8	CBF9	0.604093	0.00141733
C6	9	CBF9	0.603882	0.000623744
C6	10	CBF9	0.60482	0.000980652
C6	11	CBF9	0.605666	0.00124452
C6	12	CBF9	0.604887	-0.000115845
C6	13	CBF9	0.607023	0.00143769
C6	14	CBF9	0.606504	0.000337201
C6	15	CBF9	0.607756	0.00100733
C6	16	CBF9	0.607641	0.000310429
C6	17	CBF9	0.608148	0.000236037
C6	18	CBF9	0.608129	-0.000364901
C6	19	CBF9	0.608171	-0.00090403
C6	20	CBF9	0.608678	-0.000979375
C6	21	CBF9	0.609764	-0.000474767
C6	22	CBF9	0.609128	-0.00169291
C6	23	CBF9	0.609363	-0.00203964
C6	24	CBF9	0.610392	-0.00159207
C6	25	CBF9	0.61285	0.000283743
C6	26	CBF9	0.616968	0.00382044
C6	27	CBF9	0.624387	0.0106582
C6	28	CBF9	0.638059	0.0237479
C6	29	CBF9	0.664327	0.0494338
C6	30	CBF9	0.715555	0.100081
C6	31	CBF9	0.807112	0.191056
C6	32	CBF9	0.963542	0.346904
C6	33	CBF9	1.20474	0.58752
C6	34	CBF9	1.53088	0.913083
C6	35	CBF9	1.89006	1.27167
C6	36	CBF9	2.21924	1.60028
C6	37	CBF9	2.47935	1.8598
C6	38	CBF9	2.6662	2.04607
C6	39	CBF9	2.81343	2.19272
C6	40	CBF9	2.92283	2.30154
C7	1	CBF9	0.652103	-0.00145213
C7	2	CBF9	0.652091	-0.002273
C7	3	CBF9	0.653555	-0.0016189
C7	4	CBF9	0.654558	-0.00142482
C7	5	CBF9	0.655754	-0.00103763
C7	6	CBF9	0.658502	0.00090078
C7	7	CBF9	0.659564	0.00115339
C7	8	CBF9	0.659411	0.000190776
C7	9	CBF9	0.660357	0.000328466
C7	10	CBF9	0.663213	0.00237499
C7	11	CBF9	0.662329	0.000681749
C7	12	CBF9	0.66314	0.0006836
C7	13	CBF9	0.664155	0.000888941
C7	14	CBF9	0.665637	0.00156206
C7	15	CBF9	0.664823	-6.15675e-05
C7	16	CBF9	0.666067	0.00037343
C7	17	CBF9	0.666851	0.000347983
C7	18	CBF9	0.666032	-0.00128041
C7	19	CBF9	0.667021	-0.00110046
C7	20	CBF9	0.667697	-0.00123386
C7	21	CBF9	0.667729	-0.0020105
C7	22	CBF9	0.668006	-0.00254342
C7	23	CBF9	0.66942	-0.00193849
C7	24	CBF9	0.670394	-0.00177356
C7	25	CBF9	0.675052	0.00207505
C7	26	CBF9	0.678249	0.0044624
C7	27	CBF9	0.687546	0.0129508
C7	28	CBF9	0.704987	0.0295826
C7	29	CBF9	0.737211	0.0609971
C7	30	CBF9	0.801376	0.124353
C7	31	CBF9	0.91322	0.235388
C7	32	CBF9	1.09652	0.417875
C7	33	CBF9	1.37041	0.690962
C7	34	CBF9	1.71621	1.03595
C7	35	CBF9	2.07372	1.39265
C7	36	CBF9	2.38834	1.70646
C7	37	CBF9	2.61721	1.93452
C7	38	CBF9	2.78769	2.10419
C7	39	CBF9	2.91516	2.23085
C7	40	CBF9	3.01361	2.3285
C8	1	CBF10	0.796684	0.00568843
C8	2	CBF10	0.79238	0.00152125
C8	3	CBF10	0.791593	0.000871873
C8	4	CBF10	0.788928	-0.00165606
C8	5	CBF10	0.788815	-0.00163113
C8	6	CBF10	0.789995	-0.000314444
C8	7	CBF10	0.789285	-0.000886631
C8	8	CBF10	0.789801	-0.000233347
C8	9	CBF10	0.790861	0.000963294
C8	10	CBF10	0.790753	0.000992816
C8	11	CBF10	0.790978	0.00135553
C8	12	CBF10	0.791436	0.00195022
C8	13	CBF10	0.791014	0.00166545
C8	14	CBF10	0.790888	0.00167703
C8	15	CBF10	0.789235	0.00016136
C8	16	CBF10	0.7899	0.000963179
C8	17	CBF10	0.788789	-1.05048e-05
C8	18	CBF10	0.788188	-0.000474092
C8	19	CBF10	0.786922	-0.00160287
C8	20	CBF10	0.784721	-0.0036663
C8	21	CBF10	0.78619	-0.00206048
C8	22	CBF10	0.786079	-0.00203382
C8	23	CBF10	0.785731	-0.00224468
C8	24	CBF10	0.788792	0.000953366
C8	25	CBF10	0.792961	0.00526024
C8	26	CBF10	0.801237	0.013673
C8	27	CBF10	0.820134	0.032708
C8	28	CBF10	0.856271	0.0689823
C8	29	CBF10	0.92277	0.135618
C8	30	CBF10	1.03676	0.249747
C8	31	CBF10	1.22065	0.433775
C8	32	CBF10	1.47264	0.685896
C8	33	CBF10	1.74453	0.95793
C8	34	CBF10	1.97787	1.1914
C8	35	CBF10	2.1561	1.36977
C8	36	CBF10	2.30032	1.51413
C8	37	CBF10	2.41782	1.63176
C8	38	CBF10	2.51251	1.7266
C8	39	CBF10	2.5888	1.80302
C8	40	CBF10	2.65927	1.87363
C9	1	CBF10	0.812225	0.00901932
C9	2	CBF10	0.806293	0.00235141
C9	3	CBF10	0.804816	0.00013818
C9	4	CBF10	0.805105	-0.000308671
C9	5	CBF10	0.804779	-0.00136981
C9	6	CBF10	0.805653	-0.00123218
C9	7	CBF10	0.806947	-0.000674449
C9	8	CBF10	0.808373	1.62544e-05
C9	9	CBF10	0.810229	0.00113647
C9	10	CBF10	0.809803	-2.56373e-05
C9	11	CBF10	0.810368	-0.00019634
C9	12	CBF10	0.813652	0.00235123
C9	13	CBF10	0.813986	0.00194991
C9	14	CBF10	0.813469	0.000697149
C9	15	CBF10	0.813276	-0.000232141
C9	16	CBF10	0.815525	0.00128152
C9	17	CBF10	0.814794	-0.000185699
C9	18	CBF10	0.815978	0.000262593
C9	19	CBF10	0.815768	-0.000683149
C9	20	CBF10	0.815945	-0.0012423
C9	21	CBF10	0.816124	-0.00179882
C9	22	CBF10	0.817216	-0.00144339
C9	23	CBF10	0.819536	0.000141323
C9	24	CBF10	0.821549	0.00141794
C9	25	CBF10	0.827491	0.00662393
C9	26	CBF10	0.83833	0.0167275
C9	27	CBF10	0.859855	0.0375161
C9	28	CBF10	0.899487	0.0764127
C9	29	CBF10	0.972345	0.148535
C9	30	CBF10	1.10415	0.2796
C9	31	CBF10	1.31292	0.487641
C9	32	CBF10	1.60646	0.780438
C9	33	CBF10	1.93825	1.11149
C9	34	CBF10	2.23637	1.40888
C9	35	CBF10	2.47019	1.64196
C9	36	CBF10	2.65552	1.82656
C9	37	CBF10	2.80188	1.97218
C9	38	CBF10	2.93524	2.10481
C9	39	CBF10	3.03768	2.20651
C9	40	CBF10	3.12764	2.29574
C10	1	CBF10	0.801684	0.00390483
C10	2	CBF10	0.799577	0.00108762
C10	3	CBF10	0.79824	-0.000960103
C10	4	CBF10	0.800218	0.000307805
C10	5	CBF10	0.800102	-0.000519034
C10	6	CBF10	0.801205	-0.000125824
C10	7	CBF10	0.801957	-8.41038e-05
C10	8	CBF10	0.803493	0.000740583
C10	9	CBF10	0.803763	0.000300162
C10	10	CBF10	0.804974	0.000800898
C10	11	CBF10	0.805806	0.00092237
C10	12	CBF10	0.805245	-0.000348523
C10	13	CBF10	0.806722	0.000417692
C10	14	CBF10	0.806944	-7.1069e-05
C10	15	CBF10	0.808439	0.000713683
C10	16	CBF10	0.807054	-0.00138184
C10	17	CBF10	0.811048	0.00190237
C10	18	CBF10	0.808645	-0.00121096
C10	19	CBF10	0.80965	-0.000916634
C10	20	CBF10	0.810499	-0.000778115
C10	21	CBF10	0.810859	-0.00112853
C10	22	CBF10	0.811699	-0.000998777
C10	23	CBF10	0.813374	-3.49725e-05
C10	24	CBF10	0.816572	0.00245292
C10	25	CBF10	0.825263	0.0104334
C10	26	CBF10	0.836231	0.0206914
C10	27	CBF10	0.863544	0.0472938
C10	28	CBF10	0.910009	0.0930488
C10	29	CBF10	0.999419	0.181748
C10	30	CBF10	1.14946	0.331081
C10	31	CBF10	1.38109	0.562001
C10	32	CBF10	1.69083	0.871024
C10	33	CBF10	2.00969	1.18917
C10	34	CBF10	2.27094	1.44971
C10	35	CBF10	2.47454	1.65261
C10	36	CBF10	2.64774	1.8251
C10	37	CBF10	2.78542	1.96206
C10	38	CBF10	2.89925	2.07518
C10	39	CBF10	2.99465	2.16987
C10	40	CBF10	3.06828	2.24279
C11	1
C11	2
C11	3
C11	4
C11	5
C11	6
C11	7
C11	8
C11	9
C11	10
C11	11
C11	12
C11	13
C11	14
C11	15
C11	16
C11	17
C11	18
C11	19
C11	20
C11	21
C11	22
C11	23
C11	24
C11	25
C11	26
C11	27
C11	28
C11	29
C11	30
C11	31
C11	32
C11	33
C11	34
C11	35
C11	36
C11	37
C11	38
C11	39
C11	40
C12	1
C12	2
C12	3
C12	4
C12	5
C12	6
C12	7
C12	8
C12	9
C12	10
C12	11
C12	12
C12	13
C12	14
C12	15
C12	16
C12	17
C12	18
C12	19
C12	20
C12	21
C12	22
C12	23
C12	24
C12	25
C12	26
C12	27
C12	28
C12	29
C12	30
C12	31
C12	32
C12	33
C12	34
C12	35
C12	36
C12	37
C12	38
C12	39
C12	40
D1	1
D1	2
D1	3
D1	4
D1	5
D1	6
D1	7
D1	8
D1	9
D1	10
D1	11
D1	12
D1	13
D1	14
D1	15
D1	16
D1	17
D1	18
D1	19
D1	20
D1	21
D1	22
D1	23
D1	24
D1	25
D1	26
D1	27
D1	28
D1	29
D1	30
D1	31
D1	32
D1	33
D1	34
D1	35
D1	36
D1	37
D1	38
D1	39
D1	40
D2	1	CBF9	0.717465	0.00296711
D2	2	CBF9	0.716253	0.000651218
D2	3	CBF9	0.717476	0.000771663
D2	4	CBF9	0.715782	-0.00202626
D2	5	CBF9	0.717681	-0.00123031
D2	6	CBF9	0.720431	0.000416131
D2	7	CBF9	0.720778	-0.000339792
D2	8	CBF9	0.723236	0.00101483
D2	9	CBF9	0.724077	0.00075243
D2	10	CBF9	0.725199	0.000771487
D2	11	CBF9	0.725848	0.000317223
D2	12	CBF9	0.728673	0.00203895
D2	13	CBF9	0.728098	0.000359807
D2	14	CBF9	0.729002	0.000161069
D2	15	CBF9	0.729121	-0.000823796
D2	16	CBF9	0.730616	-0.000431375
D2	17	CBF9	0.730217	-0.00193397
D2	18	CBF9	0.732883	-0.000371744
D2	19	CBF9	0.733988	-0.000369675
D2	20	CBF9	0.734671	-0.000790321
D2	21	CBF9	0.738278	0.00171365
D2	22	CBF9	0.742957	0.0052898
D2	23	CBF9	0.75324	0.0144694
D2	24	CBF9	0.7706	0.0307261
D2	25	CBF9	0.805639	0.0646615
D2	26	CBF9	0.867148	0.125067
D2	27	CBF9	0.982821	0.239637
D2	28	CBF9	1.16954	0.425249
D2	29	CBF9	1.44108	0.69569
D2	30	CBF9	1.78477	1.03828
D2	31	CBF9	2.13101	1.38342
D2	32	CBF9	2.41299	1.66429
D2	33	CBF9	2.63325	1.88345
D2	34	CBF9	2.79608	2.04518
D2	35	CBF9	2.92081	2.1688
D2	36	CBF9	3.01803	2.26492
D2	37	CBF9	3.10201	2.34779
D2	38	CBF9	3.16172	2.4064
D2	39	CBF9	3.21439	2.45796
D2	40	CBF9	3.25415	2.49663
D3	1	CBF9	0.634346	-0.000305925
D3	2	CBF9	0.636124	0.00054125
D3	3	CBF9	0.636895	0.000382537
D3	4	CBF9	0.635542	-0.00190037
D3	5	CBF9	0.636504	-0.0018687
D3	6	CBF9	0.640372	0.00106934
D3	7	CBF9	0.641083	0.000850429
D3	8	CBF9	0.640985	-0.000178095
D3	9	CBF9	0.642696	0.000602859
D3	10	CBF9	0.644003	0.000979634
D3	11	CBF9	0.644968	0.00101434
D3	12	CBF9	0.644249	-0.000634253
D3	13	CBF9	0.648651	0.00283702
D3	14	CBF9	0.647424	0.000679998
D3	15	CBF9	0.647712	3.83079e-05
D3	16	CBF9	0.646451	-0.00215286
D3	17	CBF9	0.647605	-0.00192909
D3	18	CBF9	0.649661	-0.000803804
D3	19	CBF9	0.651797	0.000402548
D3	20	CBF9	0.651969	-0.00035543
D3	21	CBF9	0.65422	0.000965601
D3	22	CBF9	0.657656	0.0034708
D3	23	CBF9	0.66837	0.0132553
D3	24	CBF9	0.687049	0.0310035
D3	25	CBF9	0.721886	0.064911
D3	26	CBF9	0.785617	0.127712
D3	27	CBF9	0.899158	0.240323
D3	28	CBF9	1.08521	0.425449
D3	29	CBF9	1.3639	0.703209
D3	30	CBF9	1.70765	1.04602
D3	31	CBF9	2.05968	1.39712
D3	32	CBF9	2.35314	1.68965
D3	33	CBF9	2.57754	1.91313
D3	34	CBF9	2.74728	2.08194
D3	35	CBF9	2.87959	2.21332
D3	36	CBF9	2.97811	2.3109
D3	37	CBF9	3.05574	2.3876
D3	38	CBF9	3.12193	2.45287
D3	39	CBF9	3.17368	2.50368
D3	40	CBF9	3.21943	2.5485
D4	1	CBF9	0.761736	0.00235373
D4	2	CBF9	0.761283	0.000937965
D4	3	CBF9	0.760881	-0.000425823
D4	4	CBF9	0.760614	-0.00165604
D4	5	CBF9	0.761447	-0.00178488
D4	6	CBF9	0.763532	-0.000662257
D4	7	CBF9	0.76509	-6.67802e-05
D4	8	CBF9	0.765723	-0.000395832
D4	9	CBF9	0.768967	0.00188604
D4	10	CBF9	0.76903	0.000986273
D4	11	CBF9	0.770601	0.00159486
D4	12	CBF9	0.772023	0.00205444
D4	13	CBF9	0.773525	0.00259419
D4	14	CBF9	0.771493	-0.000400385
D4	15	CBF9	0.773122	0.000266558
D4	16	CBF9	0.773345	-0.000472812
D4	17	CBF9	0.776235	0.00145489
D4	18	CBF9	0.77411	-0.00163195
D4	19	CBF9	0.774543	-0.00216181
D4	20	CBF9	0.776351	-0.00131617
D4	21	CBF9	0.778767	0.00013749
D4	22	CBF9	0.783984	0.00439251
D4	23	CBF9	0.794403	0.013849
D4	24	CBF9	0.810603	0.0290869
D4	25	CBF9	0.844791	0.0623124
D4	26	CBF9	0.90674	0.123299
D4	27	CBF9	1.01551	0.231109
D4	28	CBF9	1.19482	0.409455
D4	29	CBF9	1.45204	0.665711
D4	30	CBF9	1.76973	0.982444
D4	31	CBF9	2.08456	1.2963
D4	32	CBF9	2.34673	1.55752
D4	33	CBF9	2.54226	1.75208
D4	34	CBF9	2.68877	1.89763
D4	35	CBF9	2.80373	2.01163
D4	36	CBF9	2.88828	2.09521
D4	37	CBF9	2.95934	2.16532
D4	38	CBF9	3.00867	2.21369
D4	39	CBF9	3.05306	2.25711
D4	40	CBF9	3.09019	2.29328
D5	1	CBF9	0.70965	0.00118016
D5	2	CBF9	0.709585	0.000645426
D5	3	CBF9	0.709016	-0.000393501
D5	4	CBF9	0.708405	-0.00147487
D5	5	CBF9	0.70834	-0.00200984
D5	6	CBF9	0.709914	-0.000906157
D5	7	CBF9	0.710396	-0.000894076
D5	8	CBF9	0.711939	0.000179445
D5	9	CBF9	0.712216	-1.36328e-05
D5	10	CBF9	0.714419	0.00171858
D5	11	CBF9	0.713788	0.00061802
D5	12	CBF9	0.715519	0.00187846
D5	13	CBF9	0.71577	0.0016594
D5	14	CBF9	0.715616	0.0010355
D5	15	CBF9	0.716634	0.00158378
D5	16	CBF9	0.716802	0.00128133
D5	17	CBF9	0.716768	0.000777173
D5	18	CBF9	0.716872	0.000411539
D5	19	CBF9	0.716545	-0.000385036
D5	20	CBF9	0.717904	0.000503472
D5	21	CBF9	0.717859	-1.12325e-05
D5	22	CBF9	0.717785	-0.000555739
D5	23	CBF9	0.718355	-0.000455741
D5	24	CBF9	0.71863	-0.000650965
D5	25	CBF9	0.718223	-0.00152789
D5	26	CBF9	0.717414	-0.0028066
D5	27	CBF9	0.718998	-0.00169315
D5	28	CBF9	0.719818	-0.00134293
D5	29	CBF9	0.720025	-0.00160646
D5	30	CBF9	0.72269	0.000588521
D5	31	CBF9	0.727064	0.00449261
D5	32	CBF9	0.736311	0.0132699
D5	33	CBF9	0.754557	0.0310452
D5	34	CBF9	0.789456	0.0654748
D5	35	CBF9	0.852796	0.128344
D5	36	CBF9	0.964686	0.239764
D5	37	CBF9	1.15209	0.426699
D5	38	CBF9	1.41809	0.69223
D5	39	CBF9	1.75722	1.03089
D5	40	CBF9	2.09945	1.37265
D6	1	CBF9	0.612633	-0.00522507
D6	2	CBF9	0.613639	-0.00465379
D6	3	CBF9	0.61534	-0.00338717
D6	4	CBF9	0.615469	-0.00369243
D6	5	CBF9	0.614977	-0.00461872
D6	6	CBF9	0.617121	-0.00290899
D6	7	CBF9	0.619535	-0.0009289
D6	8	CBF9	0.620265	-0.000633233
D6	9	CBF9	0.621691	0.000358675
D6	10	CBF9	0.623035	0.00126767
D6	11	CBF9	0.622677	0.000475198
D6	12	CBF9	0.624292	0.00165677
D6	13	CBF9	0.62449	0.00141987
D6	14	CBF9	0.626264	0.00275987
D6	15	CBF9	0.626211	0.00227221
D6	16	CBF9	0.62419	-0.00018246
D6	17	CBF9	0.625481	0.000674027
D6	18	CBF9	0.626423	0.00118129
D6	19	CBF9	0.627277	0.00160123
D6	20	CBF9	0.627669	0.0015593
D6	21	CBF9	0.628048	0.00150336
D6	22	CBF9	0.629761	0.00278256
D6	23	CBF9	0.630125	0.00271208
D6	24	CBF9	0.62952	0.00167296
D6	25	CBF9	0.630037	0.00175566
D6	26	CBF9	0.629584	0.000868231
D6	27	CBF9	0.630688	0.0015378
D6	28	CBF9	0.631389	0.00180444
D6	29	CBF9	0.630655	0.000635558
D6	30	CBF9	0.630996	0.000542364
D6	31	CBF9	0.629688	-0.00119973
D6	32	CBF9	0.631639	0.000317352
D6	33	CBF9	0.63004	-0.00171627
D6	34	CBF9	0.631989	-0.000201987
D6	35	CBF9	0.631667	-0.000957627
D6	36	CBF9	0.630656	-0.00240283
D6	37	CBF9	0.63128	-0.00221338
D6	38	CBF9	0.630284	-0.00364357
D6	39	CBF9	0.631691	-0.00267115
D6	40	CBF9	0.632268	-0.00252879
D7	1	CBF9	0.671182	-0.00504203
D7	2	CBF9	0.672862	-0.00389161
D7	3	CBF9	0.675208	-0.00207666
D7	4	CBF9	0.675779	-0.00203549
D7	5	CBF9	0.676696	-0.0016483
D7	6	CBF9	0.678865	-9.54386e-06
D7	7	CBF9	0.67764	-0.00176539
D7	8	CBF9	0.680186	0.000251087
D7	9	CBF9	0.682254	0.00178876
D7	10	CBF9	0.682335	0.00133939
D7	11	CBF9	0.682644	0.0011183
D7	12	CBF9	0.683315	0.00125872
D7	13	CBF9	0.685348	0.00276152
D7	14	CBF9	0.684676	0.00155947
D7	15	CBF9	0.684347	0.00070091
D7	16	CBF9	0.685102	0.000925669
D7	17	CBF9	0.686196	0.00148862
D7	18	CBF9	0.684987	-0.000250292
D7	19	CBF9	0.686352	0.000585057
D7	20	CBF9	0.686487	0.000189331
D7	21	CBF9	0.686747	-8.06883e-05
D7	22	CBF9	0.686081	-0.00127661
D7	23	CBF9	0.686037	-0.00185091
D7	24	CBF9	0.686419	-0.00199975
D7	25	CBF9	0.688313	-0.000635709
D7	26	CBF9	0.687884	-0.00159482
D7	27	CBF9	0.690151	0.000141933
D7	28	CBF9	0.691654	0.00111539
D7	29	CBF9	0.697016	0.00594681
D7	30	CBF9	0.708194	0.0165942
D7	31	CBF9	0.729021	0.0368913
D7	32	CBF9	0.769159	0.0764992
D7	33	CBF9	0.840504	0.147314
D7	34	CBF9	0.967217	0.273497
D7	35	CBF9	1.17395	0.4797
D7	36	CBF9	1.46786	0.773084
D7	37	CBF9	1.81944	1.12413
D7	38	CBF9	2.16223	1.46639
D7	39	CBF9	2.45035	1.75397
D7	40	CBF9	2.6603	1.96339
D8	1	CBF10	0.783537	0.00271611
D8	2	CBF10	0.780251	-0.00102253
D8	3	CBF10	0.779769	-0.00195557
D8	4	CBF10	0.778982	-0.00319499
D8	5	CBF10	0.779766	-0.00286227
D8	6	CBF10	0.780056	-0.00302397
D8	7	CBF10	0.782622	-0.00090997
D8	8	CBF10	0.784197	0.000213284
D8	9	CBF10	0.784277	-0.000158048
D8	10	CBF10	0.786398	0.00151107
D8	11	CBF10	0.78751	0.00217137
D8	12	CBF10	0.787966	0.00217555
D8	13	CBF10	0.789764	0.00352131
D8	14	CBF10	0.788987	0.00229327
D8	15	CBF10	0.789379	0.00223326
D8	16	CBF10	0.788935	0.00133758
D8	17	CBF10	0.790197	0.00214756
D8	18	CBF10	0.792246	0.00374496
D8	19	CBF10	0.790567	0.00161398
D8	20	CBF10	0.790204	0.000799908
D8	21	CBF10	0.789326	-0.000529689
D8	22	CBF10	0.789621	-0.000686504
D8	23	CBF10	0.789884	-0.000875804
D8	24	CBF10	0.789306	-0.00190511
D8	25	CBF10	0.788891	-0.00277176
D8	26	CBF10	0.789102	-0.00301309
D8	27	CBF10	0.791582	-0.000984922
D8	28	CBF10	0.792127	-0.000891398
D8	29	CBF10	0.796562	0.00309175
D8	30	CBF10	0.807215	0.0132935
D8	31	CBF10	0.823963	0.02959
D8	32	CBF10	0.859025	0.0641998
D8	33	CBF10	0.919301	0.124024
D8	34	CBF10	1.02911	0.233383
D8	35	CBF10	1.21163	0.415453
D8	36	CBF10	1.47115	0.674513
D8	37	CBF10	1.77077	0.973691
D8	38	CBF10	2.04734	1.24981
D8	39	CBF10	2.26799	1.47
D8	40	CBF10	2.43759	1.63915
D9	1	CBF10	0.77454	0.00666305
D9	2	CBF10	0.768621	0.000424181
D9	3	CBF10	0.767588	-0.000927702
D9	4	CBF10	0.767129	-0.00170613
D9	5	CBF10	0.767337	-0.00181746
D9	6	CBF10	0.766741	-0.00273292
D9	7	CBF10	0.769346	-0.000447488
D9	8	CBF10	0.770163	4.98035e-05
D9	9	CBF10	0.770706	0.000273569
D9	10	CBF10	0.772443	0.00169145
D9	11	CBF10	0.772149	0.00107777
D9	12	CBF10	0.773568	0.00217815
D9	13	CBF10	0.773923	0.00221332
D9	14	CBF10	0.772863	0.00083432
D9	15	CBF10	0.774299	0.00195096
D9	16	CBF10	0.774041	0.00137311
D9	17	CBF10	0.774828	0.00184113
D9	18	CBF10	0.773849	0.000543071
D9	19	CBF10	0.773968	0.000342511
D9	20	CBF10	0.773937	-8.01362e-06
D9	21	CBF10	0.774509	0.000244482
D9	22	CBF10	0.773122	-0.00146127
D9	23	CBF10	0.774142	-0.000761327
D9	24	CBF10	0.773429	-0.00179301
D9	25	CBF10	0.773087	-0.0024545
D9	26	CBF10	0.774138	-0.00172284
D9	27	CBF10	0.775253	-0.000927465
D9	28	CBF10	0.778646	0.00214648
D9	29	CBF10	0.784386	0.00756657
D9	30	CBF10	0.795924	0.0187854
D9	31	CBF10	0.818841	0.0413835
D9	32	CBF10	0.865321	0.0875436
D9	33	CBF10	0.943349	0.165253
D9	34	CBF10	1.08188	0.303461
D9	35	CBF10	1.29013	0.511391
D9	36	CBF10	1.56492	0.785867
D9	37	CBF10	1.84221	1.06284
D9	38	CBF10	2.07492	1.29523
D9	39	CBF10	2.25221	1.4722
D9	40	CBF10	2.40313	1.6228
D10	1	CBF10	0.776524	0.00160918
D10	2	CBF10	0.775733	0.000483292
D10	3	CBF10	0.773714	-0.00186986
D10	4	CBF10	0.774086	-0.00183328
D10	5	CBF10	0.774758	-0.00149587
D10	6	CBF10	0.775163	-0.00142633
D10	7	CBF10	0.777233	0.000309342
D10	8	CBF10	0.777834	0.000575282
D10	9	CBF10	0.777936	0.000342569
D10	10	CBF10	0.779513	0.00158477
D10	11	CBF10	0.779602	0.00133859
D10	12	CBF10	0.780671	0.00207308
D10	13	CBF10	0.779706	0.000773444
D10	14	CBF10	0.7812	0.00193208
D10	15	CBF10	0.780947	0.00134448
D10	16	CBF10	0.781155	0.00121733
D10	17	CBF10	0.781147	0.000874229
D10	18	CBF10	0.7808	0.000192156
D10	19	CBF10	0.781234	0.000291441
D10	20	CBF10	0.780827	-0.000449938
D10	21	CBF10	0.781145	-0.000466585
D10	22	CBF10	0.78144	-0.000507311
D10	23	CBF10	0.779826	-0.00245586
D10	24	CBF10	0.780625	-0.00199174
D10	25	CBF10	0.781377	-0.00157405
D10	26	CBF10	0.781833	-0.00145366
D10	27	CBF10	0.784076	0.000454565
D10	28	CBF10	0.786177	0.00222111
D10	29	CBF10	0.793426	0.00913494
D10	30	CBF10	0.806153	0.021527
D10	31	CBF10	0.831849	0.0468881
D10	32	CBF10	0.879756	0.0944607
D10	33	CBF10	0.965758	0.180127
D10	34	CBF10	1.11126	0.325298
D10	35	CBF10	1.33463	0.548329
D10	36	CBF10	1.62056	0.833927
D10	37	CBF10	1.8991	1.11213
D10	38	CBF10	2.1298	1.3425
D10	39	CBF10	2.30896	1.52132
D10	40	CBF10	2.46676	1.67878
D11	1
D11	2
D11	3
D11	4
D11	5
D11	6
D11	7
D11	8
D11	9
D11	10
D11	11
D11	12
D11	13
D11	14
D11	15
D11	16
D11	17
D11	18
D11	19
D11	20
D11	21
D11	22
D11	23
D11	24
D11	25
D11	26
D11	27
D11	28
D11	29
D11	30
D11	31
D11	32
D11	33
D11	34
D11	35
D11	36
D11	37
D11	38
D11	39
D11	40
D12	1
D12	2
D12	3
D12	4
D12	5
D12	6
D12	7
D12	8
D12	9
D12	10
D12	11
D12	12
D12	13
D12	14
D12	15
D12	16
D12	17
D12	18
D12	19
D12	20
D12	21
D12	22
D12	23
D12	24
D12	25
D12	26
D12	27
D12	28
D12	29
D12	30
D12	31
D12	32
D12	33
D12	34
D12	35
D12	36
D12	37
D12	38
D12	39
D12	40
E1	1
E1	2
E1	3
E1	4
E1	5
E1	6
E1	7
E1	8
E1	9
E1	10
E1	11
E1	12
E1	13
E1	14
E1	15
E1	16
E1	17
E1	18
E1	19
E1	20
E1	21
E1	22
E1	23
E1	24
E1	25
E1	26
E1	27
E1	28
E1	29
E1	30
E1	31
E1	32
E1	33
E1	34
E1	35
E1	36
E1	37
E1	38
E1	39
E1	40
E2	1	CBF9	0.687076	0.00127297
E2	2	CBF9	0.686785	8.06803e-05
E2	3	CBF9	0.68785	0.000244579
E2	4	CBF9	0.687521	-0.000986151
E2	5	CBF9	0.688453	-0.000954575
E2	6	CBF9	0.690131	-0.000177761
E2	7	CBF9	0.692207	0.00099602
E2	8	CBF9	0.691918	-0.000193405
E2	9	CBF9	0.692186	-0.000827314
E2	10	CBF9	0.695747	0.00183247
E2	11	CBF9	0.695379	0.000562817
E2	12	CBF9	0.698126	0.00240876
E2	13	CBF9	0.695944	-0.000673947
E2	14	CBF9	0.698	0.00048076
E2	15	CBF9	0.698243	-0.000177587
E2	16	CBF9	0.699479	0.000157199
E2	17	CBF9	0.69998	-0.000243001
E2	18	CBF9	0.699502	-0.00162262
E2	19	CBF9	0.701008	-0.00101837
E2	20	CBF9	0.701102	-0.00182572
E2	21	CBF9	0.702283	-0.00154613
E2	22	CBF9	0.705201	0.000471411
E2	23	CBF9	0.708724	0.00309257
E2	24	CBF9	0.717817	0.0112848
E2	25	CBF9	0.734786	0.0273522
E2	26	CBF9	0.765088	0.0567524
E2	27	CBF9	0.823305	0.114068
E2	28	CBF9	0.922885	0.212747
E2	29	CBF9	1.0892	0.378166
E2	30	CBF9	1.33165	0.619714
E2	31	CBF9	1.6267	0.913854
E2	32	CBF9	1.92534	1.2116
E2	33	CBF9	2.17886	1.46422
[truncated: 1,847 more rows]

## Sheet: BioGroup Analysis Result
Block Type	96alum
Chemistry	SYBR_GREEN
Experiment File Name	D:\HAIFENG\CBF910Untitled.eds
Experiment Run End Time	2013-01-10 13:02:24 PM CST
Instrument Type	sds7500
Passive Reference	ROX
Biogroup Name	Target Name	Task	RQ	RQ Min	RQ Max	Cт Mean	ΔCт Mean	ΔCт SE	ΔΔCт
Analysis Type	Singleplex
Endogenous Control	CBF9
RQ Min/Max Confidence Level	95.0
Reference Biogroup Name

## Sheet: Technical Analysis Result
Block Type	96alum
Chemistry	SYBR_GREEN
Experiment File Name	D:\HAIFENG\CBF910Untitled.eds
Experiment Run End Time	2013-01-10 13:02:24 PM CST
Instrument Type	sds7500
Passive Reference	ROX
Sample Name	Target Name	Task	RQ	RQ Min	RQ Max	Cт Mean	ΔCт Mean	ΔCт SE	ΔΔCт
6-2	CBF10	UNKNOWN				27.4545	-0.0106843	0.0933535
6-3	CBF10	UNKNOWN				28.8126	0.207399	0.30298
12-1	CBF10	UNKNOWN				29.8719	-1.03249	0.210309
12-2	CBF10	UNKNOWN				33.8644	-0.00297419	0.907597
3-1	CBF10	UNKNOWN
12-3	CBF10	UNKNOWN				36.8586	2.07123	0.509629
3-2	CBF10	UNKNOWN
24-1	CBF10	UNKNOWN				32.9526	-3.16306	0.547977
3-3	CBF10	UNKNOWN
24-2	CBF10	UNKNOWN				31.0358	0.280565	0.154096
6-1	CBF10	UNKNOWN				27.934	1.47673	0.0733126
24-3	CBF10	UNKNOWN				33.9587	-0.359086	1.11833
Analysis Type	Singleplex
Endogenous Control	CBF9
RQ Min/Max Confidence Level	95.0
Reference Sample	3-1
