# Supplementary material for: Genome-wide identification of CBF genes and their responses to cold acclimation in Taraxacum kok-saghyz
Source: PeerJ journal article supplement (doi:10.7717/peerj.13429), 2022-05-12
Supplement: Raw_data.zip [file CBF10-18SRNA.xls]

## Sheet: Results
Block Type	96alum
Chemistry	SYBR_GREEN
Experiment File Name	D:\HAIFENG\1114Untitled.eds
Experiment Run End Time	2013-01-09 02:40:37 AM CST
Instrument Type	sds7500
Passive Reference	ROX
Well	Sample Name	Target Name	Task	Reporter	Quencher	RQ	RQ Min	RQ Max	Cт	Cт Mean	Cт SD	ΔCт	ΔCт Mean	ΔCт SE	HK Control ΔCт Mean	HK Control ΔCт SE	ΔΔCт	Automatic Ct Threshold	Ct Threshold	Automatic Baseline	Baseline Start	Baseline End	Efficiency	Tm1	Tm2	Tm3	Comments	HIGHSD	NOAMP	OUTLIERRG	EXPFAIL	MTP
A1	3-1	CBF10	UNKNOWN	SYBR	None				30.7968	30.7962	0.0155066							TRUE	0.0335445	TRUE	3	39	1	62.1222				N	Y	N	Y	N
A2	3-1	CBF10	UNKNOWN	SYBR	None				30.8042	30.7962	0.0155066							TRUE	0.0335445	TRUE	3	39	1	62.2968				N	Y	N	Y	N
A3	3-1	CBF10	UNKNOWN	SYBR	None				30.7807	30.7962	0.0155066							TRUE	0.0335445	TRUE	3	39	1	62.646				N	Y	N	Y	N
A7	3-1	18S	UNKNOWN	SYBR	None				14.5041	14.5062	0.0804396							TRUE	0.228892	TRUE	3	7	1	83.2492				N	N	N	N	N
A8	3-1	18S	UNKNOWN	SYBR	None				14.5072	14.5062	0.0804396							TRUE	0.228892	TRUE	3	8	1	83.2492				N	N	N	N	N
A9	3-1	18S	UNKNOWN	SYBR	None				14.5077	14.5062	0.0804396							TRUE	0.228892	TRUE	3	7	1	83.2492				N	N	N	N	N
A10	9-3	18S	UNKNOWN	SYBR	None				18.2905	18.3351	0.0650828							TRUE	0.228892	TRUE	3	13	1	82.9				N	N	N	N	N
A11	9-3	18S	UNKNOWN	SYBR	None				18.3051	18.3351	0.0650828							TRUE	0.228892	TRUE	3	13	1	82.7254				N	N	N	N	N
A12	9-3	18S	UNKNOWN	SYBR	None				18.4098	18.3351	0.0650828							TRUE	0.228892	TRUE	3	13	1	82.5508				N	N	N	N	N
B1	3-2	CBF10	UNKNOWN	SYBR	None				30.3865	30.4429	0.0564248							TRUE	0.0335445	TRUE	3	39	1	62.2968				N	Y	N	Y	N
B2	3-2	CBF10	UNKNOWN	SYBR	None				30.5197	30.4429	0.0564248							TRUE	0.0335445	TRUE	3	39	1	62.2968				N	Y	N	Y	N
B3	3-2	CBF10	UNKNOWN	SYBR	None				30.4225	30.4429	0.0564248							TRUE	0.0335445	TRUE	3	39	1	62.646				N	Y	N	Y	N
B4	12-1	CBF10	UNKNOWN	SYBR	None				27.3865	27.4476	0.0611078							TRUE	0.0335445	TRUE	3	39	1	62.646				N	Y	N	Y	N
B5	12-1	CBF10	UNKNOWN	SYBR	None				27.5298	27.4476	0.0611078							TRUE	0.0335445	TRUE	3	39	1	62.646				N	Y	N	Y	N
B6	12-1	CBF10	UNKNOWN	SYBR	None				27.4265	27.4476	0.0611078							TRUE	0.0335445	TRUE	3	39	1	62.646				N	Y	N	Y	N
B7	3-2	18S	UNKNOWN	SYBR	None				14.5855	14.5905	0.0965463							TRUE	0.228892	TRUE	3	7	1	83.4238				N	N	N	N	N
B8	3-2	18S	UNKNOWN	SYBR	None				14.5923	14.5905	0.0965463							TRUE	0.228892	TRUE	3	7	1	83.4238				N	N	N	N	N
B9	3-2	18S	UNKNOWN	SYBR	None				14.5937	14.5905	0.0965463							TRUE	0.228892	TRUE	3	7	1	83.2492				N	N	N	N	N
B10	12-1	18S	UNKNOWN	SYBR	None				14.4676	14.4082	0.026511							TRUE	0.228892	TRUE	3	18	1	82.9				N	N	N	N	N
B11	12-1	18S	UNKNOWN	SYBR	None				14.378	14.4082	0.026511							TRUE	0.228892	TRUE	3	17	1	82.7254	71.3762			N	N	N	N	Y
B12	12-1	18S	UNKNOWN	SYBR	None				14.3789	14.4082	0.026511							TRUE	0.228892	TRUE	3	18	1	82.5508				N	N	N	N	N
C1	3-3	CBF10	UNKNOWN	SYBR	None				30.4355	30.3882	0.0631002							TRUE	0.0335445	TRUE	3	30	1	80.9794				N	N	N	N	N
C2	3-3	CBF10	UNKNOWN	SYBR	None				30.3595	30.3882	0.0631002							TRUE	0.0335445	TRUE	3	39	1	62.4714				N	Y	N	Y	N
C3	3-3	CBF10	UNKNOWN	SYBR	None				30.3697	30.3882	0.0631002							TRUE	0.0335445	TRUE	3	30	1	81.154				N	N	N	N	N
C4	12-2	CBF10	UNKNOWN	SYBR	None				27.757	27.7879	0.030923							TRUE	0.0335445	TRUE	3	39	1	62.8206				N	Y	N	Y	N
C5	12-2	CBF10	UNKNOWN	SYBR	None				27.8486	27.7879	0.030923							TRUE	0.0335445	TRUE	3	39	1	62.4714				N	Y	N	Y	N
C6	12-2	CBF10	UNKNOWN	SYBR	None				27.7581	27.7879	0.030923							TRUE	0.0335445	TRUE	3	30	1	81.3286				N	N	N	N	N
C7	3-3	18S	UNKNOWN	SYBR	None				14.1867	14.1745	0.060412							TRUE	0.228892	TRUE	3	10	1	83.5984				N	N	N	N	N
C8	3-3	18S	UNKNOWN	SYBR	None				14.1587	14.1745	0.060412							TRUE	0.228892	TRUE	3	10	1	83.4238				N	N	N	N	N
C9	3-3	18S	UNKNOWN	SYBR	None				14.1782	14.1745	0.060412							TRUE	0.228892	TRUE	3	10	1	83.4238				N	N	N	N	N
C10	12-2	18S	UNKNOWN	SYBR	None				14.6056	14.6366	0.0963085							TRUE	0.228892	TRUE	3	15	1	83.0746				N	N	N	N	N
C11	12-2	18S	UNKNOWN	SYBR	None				14.6329	14.6366	0.0963085							TRUE	0.228892	TRUE	3	15	1	82.9				N	N	N	N	N
C12	12-2	18S	UNKNOWN	SYBR	None				14.6711	14.6366	0.0963085							TRUE	0.228892	TRUE	3	14	1	82.7254				N	N	N	N	N
D1	6-1	CBF10	UNKNOWN	SYBR	None				28.2861	28.274	0.011888							TRUE	0.0335445	TRUE	3	39	1	62.4714				N	Y	N	Y	N
D2	6-1	CBF10	UNKNOWN	SYBR	None				28.2621	28.274	0.011888							TRUE	0.0335445	TRUE	3	39	1	62.646				N	Y	N	Y	N
D3	6-1	CBF10	UNKNOWN	SYBR	None				28.2725	28.274	0.011888							TRUE	0.0335445	TRUE	3	39	1	62.4714				N	Y	N	Y	N
D4	12-3	CBF10	UNKNOWN	SYBR	None				26.8872	26.8787	0.42162							TRUE	0.0335445	TRUE	3	30	1	81.3286				N	N	N	N	N
D5	12-3	CBF10	UNKNOWN	SYBR	None				26.8693	26.8787	0.42162							TRUE	0.0335445	TRUE	3	39	1	63.5191				N	Y	N	Y	N
D6	12-3	CBF10	UNKNOWN	SYBR	None				26.8797	26.8787	0.42162							TRUE	0.0335445	TRUE	3	31	1	81.3286				N	N	N	N	N
D7	6-1	18S	UNKNOWN	SYBR	None				13.3794	13.3555	0.124755							TRUE	0.228892	TRUE	3	13	1	83.5984				N	N	N	N	N
D8	6-1	18S	UNKNOWN	SYBR	None				13.3683	13.3555	0.124755							TRUE	0.228892	TRUE	3	13	1	83.4238				N	N	N	N	N
D9	6-1	18S	UNKNOWN	SYBR	None				13.3187	13.3555	0.124755							TRUE	0.228892	TRUE	3	12	1	83.4238				N	N	N	N	N
D10	12-3	18S	UNKNOWN	SYBR	None				14.3596	14.3593	0.0539442							TRUE	0.228892	TRUE	3	14	1	83.2492				N	N	N	N	N
D11	12-3	18S	UNKNOWN	SYBR	None				14.3596	14.3593	0.0539442							TRUE	0.228892	TRUE	3	14	1	82.9				N	N	N	N	N
D12	12-3	18S	UNKNOWN	SYBR	None				14.3596	14.3593	0.0539442							TRUE	0.228892	TRUE	3	14	1	82.7254				N	N	N	N	N
E1	6-2	CBF10	UNKNOWN	SYBR	None				28.5886	28.5986	0.0140777							TRUE	0.0335445	TRUE	3	39	1	62.2968				N	Y	N	Y	N
E2	6-2	CBF10	UNKNOWN	SYBR	None				28.5986	28.5986	0.0140777							TRUE	0.0335445	TRUE	3	31	1	81.154				N	N	N	N	N
E3	6-2	CBF10	UNKNOWN	SYBR	None				28.6087	28.5986	0.0140777							TRUE	0.0335445	TRUE	3	31	1	81.3286				N	N	N	N	N
E4	24-1	CBF10	UNKNOWN	SYBR	None				25.4784	25.2248	0.0165151							TRUE	0.0335445	TRUE	3	39	1	62.646				N	Y	N	Y	N
E5	24-1	CBF10	UNKNOWN	SYBR	None				24.9877	25.2248	0.0165151							TRUE	0.0335445	TRUE	3	39	1	62.4714				N	Y	N	Y	N
E6	24-1	CBF10	UNKNOWN	SYBR	None				25.2083	25.2248	0.0165151							TRUE	0.0335445	TRUE	3	30	1	81.3286				N	N	N	N	N
E7	6-2	18S	UNKNOWN	SYBR	None				13.3605	13.3509	0.0294918							TRUE	0.228892	TRUE	3	11	1	83.5984				Y	N	Y	N	N
E8	6-2	18S	UNKNOWN	SYBR	None				13.3215	13.3509	0.0294918							TRUE	0.228892	TRUE	3	9	1	83.5984				Y	N	N	N	N
E9	6-2	18S	UNKNOWN	SYBR	None				13.3715	13.3509	0.0294918							TRUE	0.228892	TRUE	3	10	1	83.4238				Y	N	N	N	N
E10	24-1	18S	UNKNOWN	SYBR	None				11.2195	11.3477	0.0998427							TRUE	0.228892	TRUE	3	7	1	83.2492				N	N	N	N	N
E11	24-1	18S	UNKNOWN	SYBR	None				11.3781	11.3477	0.0998427							TRUE	0.228892	TRUE	3	7	1	83.0746				N	N	N	N	N
E12	24-1	18S	UNKNOWN	SYBR	None				11.4385	11.3477	0.0998427							TRUE	0.228892	TRUE	3	7	1	82.7254				N	N	N	N	N
F1	6-3	CBF10	UNKNOWN	SYBR	None				28.5172	28.5246	0.00734511							TRUE	0.0335445	TRUE	3	39	1	62.4714				N	Y	N	Y	N
F2	6-3	CBF10	UNKNOWN	SYBR	None				28.5881	28.5246	0.00734511							TRUE	0.0335445	TRUE	3	39	1	62.2968				N	Y	N	Y	N
F3	6-3	CBF10	UNKNOWN	SYBR	None				28.4684	28.5246	0.00734511							TRUE	0.0335445	TRUE	3	39	1	62.4714				N	Y	N	Y	N
F4	24-2	CBF10	UNKNOWN	SYBR	None				25.0183	25.0144	0.0458032							TRUE	0.0335445	TRUE	3	39	1	62.646				N	Y	N	Y	N
F5	24-2	CBF10	UNKNOWN	SYBR	None				24.9686	25.0144	0.0458032							TRUE	0.0335445	TRUE	3	31	1	81.154				N	N	N	N	N
F6	24-2	CBF10	UNKNOWN	SYBR	None				25.0563	25.0144	0.0458032							TRUE	0.0335445	TRUE	3	39	1	62.646				N	Y	N	Y	N
F7	6-3	18S	UNKNOWN	SYBR	None				13.3227	13.3426	0.0244126							TRUE	0.228892	TRUE	3	8	1	83.5984				N	N	N	N	N
F8	6-3	18S	UNKNOWN	SYBR	None				13.2779	13.3426	0.0244126							TRUE	0.228892	TRUE	3	8	1	83.4238				N	N	N	N	N
F9	6-3	18S	UNKNOWN	SYBR	None				13.4273	13.3426	0.0244126							TRUE	0.228892	TRUE	3	8	1	83.4238				N	N	N	N	N
F10	24-2	18S	UNKNOWN	SYBR	None				10.566	10.6283	0.305717							TRUE	0.228892	TRUE	3	5	1	83.2492				N	N	N	N	N
F11	24-2	18S	UNKNOWN	SYBR	None				10.3042	10.6283	0.305717							TRUE	0.228892	TRUE	3	6	1	83.0746				N	N	N	N	N
F12	24-2	18S	UNKNOWN	SYBR	None				11.0146	10.6283	0.305717							TRUE	0.228892	TRUE	3	6	1	82.7254				N	N	N	N	N
G4	24-3	CBF10	UNKNOWN	SYBR	None				25.5311	25.5752	0.0617192							TRUE	0.0335445	TRUE	3	31	1	80.9794				N	N	N	N	N
G5	24-3	CBF10	UNKNOWN	SYBR	None				25.5684	25.5752	0.0617192							TRUE	0.0335445	TRUE	3	39	1	62.646				N	Y	N	Y	N
G6	24-3	CBF10	UNKNOWN	SYBR	None				25.6262	25.5752	0.0617192							TRUE	0.0335445	TRUE	3	31	1	81.154				N	N	N	N	N
G10	24-3	18S	UNKNOWN	SYBR	None				11.3207	11.3489	0.0705388							TRUE	0.228892	TRUE	3	7	1	83.0746				N	N	N	N	N
G11	24-3	18S	UNKNOWN	SYBR	None				11.0651	11.3489	0.0705388							TRUE	0.228892	TRUE	3	8	1	82.7254				N	N	N	N	N
G12	24-3	18S	UNKNOWN	SYBR	None				11.6611	11.3489	0.0705388							TRUE	0.228892	TRUE	3	7	1	82.5508				N	N	N	N	N
Analysis Type	Singleplex
Endogenous Control	CBF10
RQ Min/Max Confidence Level	95.0
Reference Sample	3-1

## Sheet: Raw Data
Block Type	96alum
Chemistry	SYBR_GREEN
Experiment File Name	D:\HAIFENG\1114Untitled.eds
Experiment Run End Time	2013-01-09 02:40:37 AM CST
Instrument Type	sds7500
Passive Reference	ROX
Well	Cycle	1	2	3	4	5
A1	1	288615	70844.2	38911.3	358596	1018.48
A2	1	313593	75445.7	48168.4	402209	2224.3
A3	1	264082	63642.7	42170.5	344230	1266.29
A4	1	240873	54414.7	40707.9	316412	1231.29
A5	1	387398	86281.4	67029.3	489100	2136.17
A6	1	267962	57513.9	46205.1	334376	1573.36
A7	1	245227	59191.7	52492.7	381606	1689.15
A8	1	234925	54582.7	51477.5	383205	2254.08
A9	1	265009	63529.2	55060.8	415539	1759.21
A10	1	259450	67338.9	51597.7	398814	2119.56
A11	1	454954	105698	72362.4	555694	688.308
A12	1	382024	93362.3	57199.8	454279	3468.44
B1	1	248051	66350.2	37471.6	323562	1398.76
B2	1	322877	76971.8	48524.8	382210	2099.83
B3	1	265813	59363.1	41024.4	308298	937.633
B4	1	242276	58228.7	47976.6	356517	8626.23
B5	1	353044	79489.7	65242.8	449495	2644.98
B6	1	234453	54705.3	45350.4	312804	1830.59
B7	1	239352	57271.1	52494.6	357379	2089.71
B8	1	232217	57057.7	51485.1	353859	1835.28
B9	1	223398	55486.3	48957.9	349070	1283.79
B10	1	246200	61852.2	54213.2	401078	2355.3
B11	1	418297	96859.8	74887.2	534739	4104.41
B12	1	324289	79453.3	56317.1	439875	2848.16
C1	1	320096	90978.3	49280.3	388744	1829.14
C2	1	320433	76659	52942.6	396547	2654.1
C3	1	272126	64293.7	49264.2	352106	1901.93
C4	1	237566	55829.4	47798.9	334979	1621.41
C5	1	380746	84935.8	68668.3	447370	2439.95
C6	1	243540	57362.6	51173.7	338221	2121.4
C7	1	244140	59958.8	60195.1	396591	2204.12
C8	1	225003	56021.8	55151.4	365243	1334.43
C9	1	218758	54947.7	51111.5	346484	1056.31
C10	1	250021	62410.1	60185.4	431343	1994.35
C11	1	416272	97879.8	80616.2	566782	4242.23
C12	1	336398	82662.8	62035.8	471463	3011.79
D1	1	353291	91017.4	57037.1	451034	2288.6
D2	1	378558	89992.9	65014.8	471580	1849.8
D3	1	315537	76304.4	58757.6	400033	2168.04
D4	1	293433	62795.1	58465.6	379531	2204.92
D5	1	435083	97078.7	88187.2	549489	3405
D6	1	288154	65340.6	59565.1	370561	1861.58
D7	1	280376	62536.4	69483.7	425081	2950.12
D8	1	224282	51102.8	58197.8	370208	1453.42
D9	1	227892	56861.3	58767.2	382497	1952.77
D10	1	266462	65625.7	61606.4	416821	2206.92
D11	1	425875	99525.1	80174.9	537972	3084.61
D12	1	354221	85604.4	63859	467192	3316.28
E1	1	358245	94653.5	63922.1	508883	1942.27
E2	1	392642	96411.8	76091	550551	2734.99
E3	1	372254	100020	75314.2	498644	2039.36
E4	1	346791	85731.9	71242.2	446112	1962.43
E5	1	507427	128285	94702.9	558610	2991.26
E6	1	347126	81234.5	72020.2	429446	2269.85
E7	1	376063	81506.7	83863.1	477075	3889.03
E8	1	289107	65115.1	76619	472609	2448.76
E9	1	280121	66654.3	72339.4	464153	2068.45
E10	1	300977	73136.8	67575.7	448832	2145.8
E11	1	435705	102340	83718.6	552291	3671.1
E12	1	377794	90205.2	70014.5	507447	3401.62
F1	1	342714	93048.9	59795.2	451434	1852.29
F2	1	395838	100783	71318.7	510503	1929.84
F3	1	361206	90703.7	69831.8	456713	2227.78
F4	1	338520	83002.8	76062.7	486109	2294.94
F5	1	592869	133062	115278	700695	3957.05
F6	1	362723	84123.1	75433.8	459017	2092.83
F7	1	301939	77163.1	81081.8	494418	2276
F8	1	303001	74594.4	77343.4	475419	2969.3
F9	1	308113	76912.7	72823.6	462481	2163.45
F10	1	332208	86483.6	77587.7	525338	1912.17
F11	1	471261	113945	92982.9	623651	2832.68
F12	1	413089	100452	76948.6	569159	3783.41
G1	1	350999	97406	61577.4	489711	2146.24
G2	1	429589	105770	70540.3	513440	2577.7
G3	1	423780	101762	73389.1	502119	2214.83
G4	1	385328	96095.1	76835.4	504620	2141.06
G5	1	582559	151484	107291	654294	3518.35
G6	1	375855	93369.9	76973.6	480526	2590.57
G7	1	308260	77549.3	80435.7	503232	2829.33
G8	1	292175	71717.3	74025.1	471355	2370.05
G9	1	309782	79327.5	77286.4	508799	2530.14
G10	1	310043	80329.4	68826.5	478898	1093.38
G11	1	467431	114897	88981.2	601260	4074.73
G12	1	443441	108844	81662.2	615820	3552.25
H1	1	405650	109126	63185.8	526854	2325.81
H2	1	441560	112004	71800.8	538878	2739.51
H3	1	397396	97674.8	68255.7	487006	2660.27
H4	1	240261	19594.7	10510.2	8926.52	2645.98
H5	1	447655	38940.8	21627.3	17163.7	4548.03
H6	1	242444	20099.8	10784.4	8852.93	2231.77
H7	1	350076	81275.6	82592	543341	3053.08
H8	1	320666	77972.8	71210.8	468463	2852.57
H9	1	303911	77479.7	69719.2	485142	3019.23
H10	1	306270	24135.3	12246.5	9843.46	2631.44
H11	1	589463	56501	32170.2	27530.4	8189.15
H12	1	506950	45941.1	24430.8	20735.4	6409
A1	2	287021	71313.6	39089.4	358013	982.052
A2	2	314555	75996	48103.9	400784	2199.88
A3	2	264746	64282.3	42465.8	344139	1151.53
A4	2	241126	54660.7	40701.7	314734	979.832
A5	2	386423	86003.9	67175.5	489126	2334.64
A6	2	269200	58118.4	46198.7	333730	1535.63
A7	2	245474	59444.9	52508	381405	1728.57
A8	2	234094	54759.1	51159.4	380961	1897.91
A9	2	265162	64257.5	55108.6	413930	2079.24
A10	2	259095	67083.9	51414.3	396873	1681.76
A11	2	451548	105459	71832	552795	363.998
A12	2	380028	93781.1	57127.4	454439	3181.02
B1	2	247545	66707.2	37235.2	322066	1288.19
B2	2	322365	77285	48443.4	381709	1863.81
B3	2	265405	58989.8	41148.5	308511	961.172
B4	2	242685	58760.4	48172.5	357161	8560.69
B5	2	354435	80369.6	65356	449468	2746.1
B6	2	234343	54879.9	45505.7	312511	1914.53
B7	2	241543	57995.9	52651.7	358061	2329.81
B8	2	233002	57261	51469.4	352498	1781.18
B9	2	224258	55819.3	48913.5	347849	1465.31
B10	2	245591	61680	54132.8	399067	2320.28
B11	2	416296	96272.7	74729.8	533971	4071.57
B12	2	322779	79590.2	56258.8	438077	2840.32
C1	2	321688	92588.1	49549.5	387324	1942.23
C2	2	320035	76818.1	52994	395491	2198.29
C3	2	271437	64101	49417.1	351343	1942.19
C4	2	238797	56374.6	47887.3	335087	1571.6
C5	2	380163	84712.6	68852.5	448906	2699.52
C6	2	243601	57419.2	51322.1	339139	2046.72
C7	2	246520	60521.9	60560.3	397246	2006.36
C8	2	225942	56334.6	55321	365366	1443.29
C9	2	219947	55611.3	51079.7	346494	979.446
C10	2	250765	62616.9	60126.9	431034	1800.48
C11	2	416700	98198	80808.4	566859	4058.41
C12	2	335767	82857.3	61775.8	470760	2870.09
D1	2	354461	91733.1	57123.1	450261	2397.06
D2	2	378763	90485	65150.9	471407	1803.5
D3	2	316230	77033.1	58936.1	399157	2406.1
D4	2	294779	63430.1	58705.6	379969	2206.89
D5	2	436341	97787.9	88733.5	551416	3751.05
D6	2	288656	65855.7	59599.3	370668	1874.06
D7	2	282748	62879	69924.7	424900	2742.83
D8	2	225335	51111.7	58501.4	370240	1281.99
D9	2	228719	57221.4	58793.1	382133	1802.69
D10	2	267197	65823.4	61633.9	417741	2141.7
D11	2	425835	98942	80277.3	537958	3125.06
D12	2	352522	85675.3	63538.7	464697	3250.06
E1	2	358218	95407.8	64198.7	508738	2169.16
E2	2	394206	97415.9	76126.7	550253	2656.42
E3	2	372210	100645	75383.8	499065	2070.94
E4	2	347905	86520	71418.9	447041	2205.91
E5	2	508738	128555	94948.2	559718	2720.72
E6	2	346176	81677.6	72111.7	429766	2196.6
E7	2	377946	82247.4	84254.4	477833	3557.21
E8	2	291511	66347.1	76771.3	472448	2780.42
E9	2	281378	67333.1	72579.1	464711	2230.03
E10	2	302158	73545.6	67676.9	449106	2039.9
E11	2	436102	102128	83718.6	552661	3704.3
E12	2	375018	90186.6	69648.3	504652	3394.31
F1	2	341426	93017.1	59904.1	448558	1935.34
F2	2	396133	101210	71375.3	510577	1887.71
F3	2	360868	91163.7	70154.2	456675	2148.52
F4	2	340451	83772.6	76589.7	486030	2287.75
F5	2	594520	133611	115615	701535	3417.94
F6	2	362613	84649	75761.7	459376	2200.11
F7	2	302575	77533.4	81349.8	493521	2296.08
F8	2	304808	75472.3	77577.4	475642	3300.23
F9	2	309735	77531.2	72726.2	462065	2353.27
F10	2	333938	86276.1	77882.3	526232	1906.84
F11	2	472055	113619	93300.6	623719	2474.12
F12	2	411283	100393	76827.8	567845	3442.2
G1	2	350739	97868.7	61348.1	487730	1828.67
G2	2	430254	105866	70987	513597	2852.52
G3	2	423279	102125	73629.8	502236	2247.66
G4	2	387181	96519.1	77234.4	506306	2347.37
G5	2	582998	151495	107796	656426	3455.99
G6	2	375879	94340.1	77381.6	481234	2342.44
G7	2	310409	77723.9	80601.8	502832	2793.84
G8	2	294062	72711.5	74257.7	471753	2521.64
G9	2	311307	79670.5	77532.9	508732	2448.98
G10	2	311190	80690.6	69024.2	477774	1321.44
G11	2	468061	114976	89135.4	602602	4171.43
G12	2	442438	109243	81540.8	616522	3377.05
H1	2	404732	109908	63115.8	527447	1946.95
H2	2	440301	111832	71565.6	537459	2744.09
H3	2	397156	97458.6	68303.7	486171	2523.63
H4	2	239914	19492.6	10428.7	8685.52	2376.96
H5	2	447652	38932.8	21598.4	17292.9	4846.39
H6	2	241069	19872.7	10828.8	8605.17	2495.44
H7	2	350701	81821.9	82419.9	542133	2988.33
H8	2	322298	78844.4	71511	467380	3055.73
H9	2	305105	78248.6	70022.1	484297	2784.76
H10	2	305154	23672	12101.2	10318	2867.3
H11	2	584502	55752.4	31706.5	27386	7797.16
H12	2	501417	45453.7	24077.6	20695	5870.49
A1	3	284797	70959.1	38679.4	355525	1094.24
A2	3	314093	75673.9	48115.9	399233	2316.67
A3	3	264001	64438.8	42465.8	343325	1451.68
A4	3	240469	54984.1	40601.8	313814	1350.95
A5	3	386349	86194.6	67269.4	487687	2248.77
A6	3	269247	58360	46238.5	333862	1707.42
A7	3	246386	59990	52503.2	378999	2008.48
A8	3	234353	55247.1	51273.7	378921	1810.74
A9	3	266021	64666.8	54983.3	413739	1999.24
A10	3	258348	67154.8	51286.6	395709	1945.45
A11	3	450919	105128	71587.4	550532	859.534
A12	3	378020	93751.7	56755.5	450141	3706.12
B1	3	246056	66356.1	37240.6	320200	1153.64
B2	3	322646	77523.4	48559.2	381903	1881.54
B3	3	265210	59302.6	41292.9	308395	1100.44
B4	3	243636	59218.3	48287.2	357550	8778
B5	3	354324	80653.6	65449.7	450626	2780.64
B6	3	234638	55263	45621.8	312232	2177.66
B7	3	242628	58555	52741.5	358438	2348.16
B8	3	234019	57914.2	51485.9	352053	1908.46
B9	3	224542	56514.6	48944	346774	1204.94
B10	3	244343	61679.1	53994.3	396295	2137.1
B11	3	413139	96394.7	74298.5	531096	4136.23
B12	3	318789	79240.9	55668	432700	2732.85
C1	3	325122	95311.4	49360.7	384912	1634.92
C2	3	320055	76856.3	52830.3	394902	1981.77
C3	3	272047	64802.8	49468.7	350894	2102.33
C4	3	239194	56788.8	48191.5	335450	1768.9
C5	3	381140	85154.6	69300.4	449573	2652.08
C6	3	243796	57775.6	51461	339281	2175.2
C7	3	248131	60902.1	60783.9	397390	1925.12
C8	3	226965	56880.7	55404.9	365071	1163.71
C9	3	221231	55970.9	51534.8	346498	1170.38
C10	3	251302	62644	60341.1	430773	1948.27
C11	3	416513	98237.1	80866.8	567369	4096.19
C12	3	334883	83037.8	61690.6	469500	2717.42
D1	3	354418	91940.4	57020.4	448905	2230.68
D2	3	378755	90831.9	65279.8	470981	2045.05
D3	3	316578	77136.9	59140.6	399333	2299.28
D4	3	295339	63657.3	58695.9	380248	2534.57
D5	3	437601	97670.2	89300.4	552307	3964.94
D6	3	289403	66294.6	59848.5	371135	1909.56
D7	3	283975	63507.5	69951.9	425473	3210.45
D8	3	225816	51554	58396.3	370526	1279.48
D9	3	229158	57097	58805.7	381947	2282.45
D10	3	267723	65892.2	61810.9	418196	2071.19
D11	3	426100	99094.1	80437.7	537749	3176.1
D12	3	351946	85831	63328.9	461749	3199.65
E1	3	358549	95574.6	64126.9	506489	1742.71
E2	3	392761	97181.4	76106.6	547898	2622.26
E3	3	372004	101181	75588.2	499297	2060.05
E4	3	349178	87138.9	71820.9	447648	1913.06
E5	3	509634	129226	95419.6	560946	3160.1
E6	3	346785	81945.8	72215.8	429850	2350.92
E7	3	378102	82228.5	84539.5	479075	3455.72
E8	3	292897	66942.6	76818.7	473293	2491.49
E9	3	283388	67992.8	72942.9	465588	2066.61
E10	3	303339	73963.2	67912	449379	1968.1
E11	3	435977	102184	83703.1	552323	3626.25
E12	3	371995	89863.5	68999.4	500343	3149.02
F1	3	339261	92947	59376.4	445054	1933.86
F2	3	394713	100888	71279.8	508933	2275.08
F3	3	361808	91587.9	70216	456773	2418.65
F4	3	341707	84733.6	76841	487032	2276.43
F5	3	596616	134022	116066	702417	3358.99
F6	3	362577	84952.1	75662	459083	2033.04
F7	3	303812	77763.7	81337.6	493940	2454.83
F8	3	307207	76105.8	77849.4	476147	3325.53
F9	3	310784	78464.8	73229.5	462417	2310.13
F10	3	335641	87118.7	78091.8	527114	2088.04
F11	3	473932	113938	93479.2	625866	3113.59
F12	3	410959	100584	76570.1	565448	3863.34
G1	3	347043	97243	60709.7	482194	2072.5
G2	3	428806	105788	71157.9	513454	2612.05
G3	3	423925	102576	73836.5	502472	2187.05
G4	3	387404	97082.8	77503.3	506797	2294.07
G5	3	583881	151608	108185	656979	3406.09
G6	3	376158	94860.3	77384.3	481977	2412.81
G7	3	311307	78355.5	80858.3	502937	2809.72
G8	3	295649	73202.4	74428.6	472375	2453.62
G9	3	312699	80244	77748	509064	2304.92
G10	3	311869	81196.9	69123	477447	1104.29
G11	3	470125	115194	89376.5	603321	4054.18
G12	3	439633	109288	81319.1	611682	3803.96
H1	3	402148	109943	62986	524240	1885.79
H2	3	438410	111912	71405	533890	2707.45
H3	3	395768	97722.8	68423.9	484169	2970.38
H4	3	239176	19482.2	10425.9	8840.17	2937.57
H5	3	447019	39114.1	21362.5	17176.7	4907.23
H6	3	241255	19967.3	10772	8723.66	2102.17
H7	3	351166	82160.1	82167	540009	2750.57
H8	3	325290	81350.6	71744.4	466553	2966.67
H9	3	305293	78654.5	69754.3	483318	2544.94
H10	3	304433	23770.1	12173.2	10064.1	3019.18
H11	3	582250	55758.1	31553.7	27339.2	8106.77
H12	3	498251	44770.4	23874.9	20186.7	6038.77
A1	4	283601	71193.8	38827.6	353635	1328.83
A2	4	313340	76125.5	48044.9	398765	2222.18
A3	4	264733	64828.6	42454.6	343540	1252.56
A4	4	240727	54923.7	40558.5	313719	1055.27
A5	4	386837	86421.7	67328.2	487817	2268.21
A6	4	269568	58837	46323.8	333741	1746.75
A7	4	247446	60300.1	52594.9	379032	1927.24
A8	4	234757	55308.9	51073.2	378313	1880.48
A9	4	267222	64733.5	55276	413931	2127.44
A10	4	258276	67029.3	51405.3	394349	2171.9
A11	4	449128	105420	71375.9	550001	810.774
A12	4	377020	93740.9	56661.8	449197	2912.94
B1	4	245247	66639.6	37051.8	318328	1490.68
B2	4	323277	77850.6	48750.7	382000	1696.49
B3	4	265405	59733.3	41468.8	309189	1327.99
B4	4	243891	59727.2	48544.4	358192	8703.84
B5	4	354779	80997.8	65656.6	450404	3003.94
B6	4	235596	55670.9	45695.4	312826	2029.15
B7	4	243872	58957	52935.2	358601	2287.75
B8	4	235208	58404.3	51626.3	352254	1736.63
B9	4	225705	56990	49107.6	346562	1402.89
B10	4	244477	61797.5	54009.5	396234	2203.54
B11	4	412627	96586.6	74310.7	531107	3948.41
B12	4	318674	79323.5	55430.3	432313	2747.4
C1	4	325107	95714.6	49623.8	384695	1771.36
C2	4	320232	77396.8	53045.5	394421	2148.56
C3	4	272284	65258.8	49649.8	351224	1982.46
C4	4	239986	57118.1	48133.2	335566	1700.53
C5	4	381737	85655.5	69636.6	450810	2430.11
C6	4	244279	58111.7	51563.7	340104	2015.41
C7	4	249336	61425.8	60911.3	397594	2140.12
C8	4	228394	57329.8	55655.2	365873	1328.65
C9	4	222068	56302.7	51467.3	347026	1263.78
C10	4	252140	63137.9	60304.1	431196	2028.26
C11	4	417165	98901.6	81218.1	567657	4058.41
C12	4	334362	83459.2	61595.5	467911	2491.15
D1	4	354140	92422.9	57376.2	447777	2429.1
D2	4	379488	91315.7	65422	471144	1974.6
D3	4	317005	77864.6	59156.6	399647	2246.38
D4	4	296277	64582.2	58882.7	380631	2160.5
D5	4	438283	98352.7	89341.6	553659	3570.46
D6	4	290547	66812.5	60081.5	371325	1760.83
D7	4	284940	64253.7	70237.5	426040	3119.09
D8	4	226967	51835.8	58790.9	370913	1463.46
D9	4	230605	57907.9	59137.6	382413	1879.42
D10	4	268468	66314.1	62206.5	418554	2212.21
D11	4	426583	100073	80584.5	538789	3244.47
D12	4	350064	85689.2	63199.2	460345	3158.13
E1	4	358052	95906.7	64377	505815	2400.15
E2	4	393030	97625.9	76370	548860	2481.07
E3	4	373490	101965	75765.9	500954	2216.84
E4	4	349048	87773.6	71928	448938	2237.33
E5	4	510905	130185	95664.8	562062	2978.04
E6	4	347336	82672.7	72279.1	430019	2133.11
E7	4	379738	82731.1	84535.5	479022	3639.19
E8	4	294626	67683.2	77337.1	474281	2438.59
E9	4	285095	68791.7	73076	467297	2439.35
E10	4	304927	74684.4	68191.5	449425	2114.39
E11	4	437167	102980	83650.3	552326	3879.24
E12	4	370640	89680.7	68792.3	498143	3123.84
F1	4	338835	93408.8	59441.4	444077	1956.1
F2	4	395673	101633	71673.6	509773	2154.54
F3	4	362308	92180.6	70387.3	457490	2189.19
F4	4	342640	85465	76972.8	487438	2537.6
F5	4	598258	134964	116437	702497	3916.32
F6	4	363387	85836.8	76076.5	459796	2025.12
F7	4	305112	78857.1	81717	494262	1881.05
F8	4	308448	77067.8	78040.4	477272	3075.56
F9	4	312621	79332.6	73400.9	463370	1974.72
F10	4	338714	88028.3	78398	527725	1629.72
F11	4	475906	114836	93449.1	624293	2768.32
F12	4	409112	100500	76198.8	561554	3602.06
G1	4	345959	97124.4	60675.6	480477	2248.59
G2	4	429874	106364	71414.9	514522	2450.1
G3	4	424465	102792	74170.4	504068	2582.28
G4	4	387842	97391.5	77871.8	508151	2163.77
G5	4	583503	152335	108437	657923	3726.55
G6	4	377325	95541.4	77881.8	482943	2216.52
G7	4	312754	78851.2	81007.8	503487	2757.41
G8	4	297301	74110.5	74735.5	472925	2850.08
G9	4	314202	80874.2	77933.8	509594	2574.78
G10	4	313665	82219.4	69101.3	478311	1550.6
G11	4	470678	116034	89628.6	603590	4254.84
G12	4	438405	109434	80854.6	609788	3906.37
H1	4	401409	109897	62996.3	522060	2135.53
H2	4	437172	111659	71313	533171	2489.94
H3	4	394783	97994.6	68315.8	483469	2470.16
H4	4	238979	19308.2	10462.5	8766.17	2758.85
H5	4	446193	38752.5	21551.4	17395.3	4496.01
H6	4	240069	20106	10806.6	8597.99	2412.31
H7	4	352036	82881.8	82149.7	538054	3139.09
H8	4	326554	82186	71881.5	466566	2772.79
H9	4	306580	79107.9	69868	482410	2775.12
H10	4	303948	23946.9	12250.2	10368.5	2661.08
H11	4	579934	54962.4	31638.1	27091.9	7783.88
H12	4	495022	44794.9	23696.5	20311.5	5920.09
A1	5	283800	71431.8	38673.5	352684	1526.99
A2	5	313178	76100.3	48236.2	398278	2558.75
A3	5	264882	65169.6	42707.3	343624	1282.97
A4	5	241696	55137.8	40811.4	313212	1142.85
A5	5	387713	86862.1	67346.1	487714	2320.86
A6	5	270595	59278.3	46276.8	333502	1498.7
A7	5	248368	60874.5	52696.1	378913	1879.78
A8	5	235521	55990.5	51161.9	378386	2006.67
A9	5	268688	65241.8	55386.1	414314	2201.67
A10	5	258728	67615.2	51381.4	394074	2025.96
A11	5	449024	105835	71637.7	548767	1068.18
A12	5	375880	93810.5	56552.5	447963	3548.59
B1	5	245465	67098.1	37095.2	318385	1001.78
B2	5	323715	78183.7	48952.5	381757	1980.16
B3	5	265662	59929	41595.8	309280	1176.95
B4	5	244863	59810.4	48637.6	358380	9030.68
B5	5	354850	81186	65822.1	450394	2504.26
B6	5	236101	55924.3	45824.3	312547	2389.94
B7	5	245185	59527	53078.1	358243	2405.5
B8	5	236687	58993.8	51722.1	351898	1938.69
B9	5	226769	57551	49217.7	347018	1405.35
B10	5	245073	61880.9	53955.9	396486	2461.25
B11	5	413401	96967.2	74536.6	531019	3663.08
B12	5	318200	79442.7	55590.6	431777	2972.43
C1	5	326164	96900.6	49348.5	384501	2215.13
C2	5	321219	78339.5	53251.2	395102	2354.71
C3	5	273213	65434.7	49739	351238	2048.95
C4	5	241045	57709.6	48314	336175	1531.55
C5	5	382691	86024.8	69526.6	452065	2828.41
C6	5	244990	58610.9	51701.8	340448	1775.33
C7	5	250125	62147.4	60967	397195	2329.67
C8	5	229503	57881.4	55593.2	366597	1449.07
C9	5	223079	56880.6	51653.7	347501	1177.82
C10	5	253123	63774.2	60542.5	431742	1889.16
C11	5	416978	99316.1	80925.2	568007	4056.37
C12	5	334205	83608.5	61649.7	467298	2777.83
D1	5	354872	93318.7	57028.8	447102	2352.69
D2	5	380991	92044.6	65558	472346	2247.34
D3	5	317729	78272.9	59385.2	400103	2279.95
D4	5	296735	64961.9	59119.8	381202	2115.1
D5	5	440070	98798.8	89653.1	554047	3594.68
D6	5	291313	67414.7	60256.4	371885	1963.3
D7	5	286395	65143.4	70462	426299	2577.79
D8	5	227553	52334.8	58861.8	371440	1513.63
D9	5	231811	58261.4	59154.4	382548	2055.64
D10	5	269492	66769.4	62209.2	419126	1935.46
D11	5	427828	100524	80716.9	539183	2997.93
D12	5	350064	86242.2	62980.3	460185	3187.78
E1	5	358666	96588.6	64342.4	505226	2255.27
E2	5	393845	98115.1	76543	548752	2468.55
E3	5	374698	103079	76191.8	500051	2597.92
E4	5	350962	88536.3	72131.2	448943	2097.07
E5	5	513449	131467	96043.2	562708	3044.15
E6	5	348365	83370.2	72535	430134	2316.73
E7	5	379991	82977.6	84693.8	479502	3849.99
E8	5	295395	68623.9	77183.8	474602	2576.95
E9	5	286989	69352.2	73488	467570	2147.4
E10	5	306611	75125.9	68313.9	449990	2237.34
E11	5	438169	103772	84025.6	552959	3814.65
E12	5	369483	90027.7	68679.6	495874	3170.13
F1	5	338561	93811.6	59594.1	442734	1957.59
F2	5	397622	102561	71826.8	509757	2165.07
F3	5	363790	92723.7	70450.1	457549	2288.28
F4	5	343770	86094.9	77007.2	487161	2200.35
F5	5	599733	135975	116763	703986	3712.68
F6	5	364394	86633.6	76075.6	459233	2200.11
F7	5	306523	79420.2	81632.1	494268	2257.83
F8	5	309935	77886.1	78293.4	477231	3026.98
F9	5	313867	79976.6	73575.4	463501	2237.87
F10	5	341166	88996.4	78566	528536	1821.57
F11	5	477884	115425	93871.7	626680	2962.41
F12	5	410144	100817	76095.7	562229	3675.97
G1	5	346295	97369.8	60655.5	479951	1965.63
G2	5	430783	107098	71508.5	515189	2512.67
G3	5	424686	103639	74455.2	504209	2349.94
G4	5	389007	98157.5	78042.2	508697	2491.49
G5	5	585539	152445	108728	659064	3268.89
G6	5	378416	96192.3	78007.8	483100	2779.45
G7	5	314198	79849	81158.2	503576	3119.83
G8	5	298379	74689.5	74956.5	473993	2784.98
G9	5	315420	81845.3	78013.6	509586	2743.18
G10	5	315594	83009.4	69458.6	478665	1362.91
G11	5	471830	116475	89869.8	604589	4195.61
G12	5	437684	110145	81000.8	607512	3293.15
H1	5	401409	110382	62914.3	520411	2422.65
H2	5	437448	112380	71166.3	531607	2302.19
H3	5	395776	98016.1	68694.3	483450	2564.03
H4	5	238437	19328.1	10496.2	8764.27	3010.94
H5	5	446176	38990.9	21734.3	17393.3	4816.94
H6	5	239878	19948.7	10902.4	8639.28	2431.98
H7	5	353405	83214.2	82276.6	537167	2812.43
H8	5	327659	82281.7	71835.2	465917	2963.89
H9	5	307991	79516	70115.7	481192	2772.98
H10	5	303494	24132.7	12061.5	10140.5	2705.53
H11	5	577509	55141	31425	26892.7	7993.82
H12	5	491854	44699.1	23482.7	20030.8	5843.91
A1	6	284684	71612.3	38305.4	351391	798.463
A2	6	313829	76266.6	48354.3	397762	2431.34
A3	6	266098	65510.6	42607.9	343006	1194.69
A4	6	242190	55693.8	40889.2	313404	1190.54
A5	6	388725	87275.8	67480	487263	2087.56
A6	6	271068	59728.9	46623.3	333891	1667.28
A7	6	250158	61566	52840.1	379141	1899.89
A8	6	237357	56426.6	51301.9	378252	2013.31
A9	6	269657	66116.7	55382.2	413897	1927.9
A10	6	259466	67961.2	51414.3	393840	1846.82
A11	6	449480	106315	71597.7	549369	842.525
A12	6	376122	94113.4	56595.1	446983	3067.71
B1	6	245624	66746.9	36979.7	317714	1144.32
B2	6	324473	78784.4	48965.1	382008	2127.53
B3	6	266317	60130.8	41613.1	309383	1249.52
B4	6	245469	60330.3	48744.6	358198	8722.81
B5	6	355655	81491.4	65867.7	450276	2870.8
B6	6	236717	56381.6	45959.7	313194	2131.65
B7	6	246681	60008.3	53140.9	358537	2153.18
B8	6	238526	59587.1	51988.1	352025	1947.45
B9	6	228439	58080.1	49241.6	346747	1501.45
B10	6	245251	62255.9	54298.1	396222	2366.07
B11	6	413765	97396.9	74531.5	530854	4177.29
B12	6	318371	79993.7	55324.9	431308	2767.55
C1	6	327236	96996.5	49491	383786	1891.83
C2	6	322418	78716.6	53310	393929	2004.56
C3	6	273245	65806.1	49785.9	351299	2076.11
C4	6	241769	58122.8	48396.6	336724	1522.76
C5	6	383711	86567.1	69948.6	451771	2537.51
C6	6	245480	58942.4	51776.4	340204	1896.57
C7	6	251704	62565.6	61169.1	397538	2088.42
C8	6	230258	58154.1	55805.2	366689	1136.49
C9	6	224323	57005.2	51880.9	347930	1251.38
C10	6	254700	63856.4	60558	432149	1923.93
C11	6	418548	99722.6	81219.1	568287	4121.72
C12	6	334354	83826.2	61764.8	467269	2665.79
D1	6	355136	93092.9	57204.3	447350	2250.4
D2	6	381923	92471.8	65690	472324	2155.75
D3	6	318554	78777.1	59587.8	400095	2237.22
D4	6	298050	65391.7	59180.8	381652	2130.89
D5	6	441096	99528.3	89920.3	554986	3586.6
D6	6	291989	67874.2	60416.2	372104	1812.64
D7	6	287846	65793.3	70533.8	426386	3029.69
D8	6	227698	52371.2	58884.3	371528	1311.26
D9	6	232423	58744.3	59219.7	382743	2087.68
D10	6	270074	66988.3	62229.5	419275	2276.55
D11	6	428859	100912	80856.1	539331	3181.87
D12	6	350507	86521.4	63020.8	459910	3263.9
E1	6	359503	96979.5	64261.2	504823	2126.79
E2	6	393773	98060.4	76634.5	548921	2944.5
E3	6	375616	103626	76263.5	501005	2659.99
E4	6	352258	89450.3	72295.8	449414	2262.01
E5	6	515552	132522	96233.4	562949	3137.72
E6	6	349168	84145	72637.2	430626	2564.82
E7	6	381219	83467	84618.1	480482	3509.39
E8	6	296926	69105.5	77605.4	474753	2424.34
E9	6	287681	70226.6	73498.9	467802	2300.72
E10	6	308440	75657.7	68582.7	449939	2326.19
E11	6	439806	104444	84025.6	552951	3593.05
E12	6	369918	90108	68621.6	495294	3166.88
F1	6	339213	94423	59787.6	442203	1749.96
F2	6	398055	103377	71747.9	509907	2153.37
F3	6	364434	93525.8	70955.5	457993	2301.83
F4	6	344671	86326.5	77200.8	486973	2298.03
F5	6	601989	136684	116874	704559	3520.83
F6	6	365129	87090.3	76111.4	459147	2151.75
F7	6	307991	80017.1	81815.2	494513	2363.02
F8	6	310991	78322.1	78189.4	477541	3238.5
F9	6	315720	80529.3	73739.3	463399	2447.09
F10	6	345442	89768.7	78616	528639	2159.45
F11	6	481144	116473	93928.8	626831	3065.58
F12	6	412488	101480	75973.1	559378	3540.18
G1	6	345843	97406	60610.6	478286	1586.35
G2	6	432180	107500	71895.3	515590	2686.89
G3	6	426563	103982	74530.8	504355	2182
G4	6	390029	98615.7	78196.9	508395	2150.93
G5	6	587368	153429	108817	659583	3621.01
G6	6	379618	97137.6	78141	483385	2593.35
G7	6	315414	80342.9	81285.6	503808	2615.43
G8	6	299190	75507.7	75093.6	473678	2622.7
G9	6	316590	82429	78239.8	509930	2768.54
G10	6	317486	83497.2	69682.3	479046	1422.92
G11	6	474945	117481	90081.5	605958	4281.43
G12	6	438403	110414	80669.4	606793	3457.25
H1	6	401199	110300	62629.2	519038	2240.86
H2	6	436983	112432	71219.9	530556	2701.73
H3	6	395943	98478.7	68462.4	483232	2861.07
H4	6	238738	19499.2	10454	8851.56	2671.37
H5	6	446139	38834.6	21684.3	17385.3	4674.63
H6	6	240171	19877.2	10678.8	8786.5	2457
H7	6	354121	83861.7	82393.9	536267	3071.44
H8	6	327573	82781.7	71925.1	465186	2774.65
H9	6	308015	80343	70176.2	482000	2893.97
H10	6	303744	23690.1	12129.8	10060.4	2763.57
H11	6	576890	55023.8	31378.1	27161.4	8280.83
H12	6	491114	44215.7	23406.4	20408.8	5502.03
A1	7	283306	71659.9	38622.6	350464	1221.01
A2	7	313976	76349.1	48369.6	397522	2372.94
A3	7	266955	65855.8	42690.1	343639	1496.8
A4	7	242184	55833.3	40849.4	312993	1362.23
A5	7	389586	87791.7	67551.1	487815	2277.12
A6	7	271704	59820.5	46550.8	334233	1758.79
A7	7	251752	61969.4	52883.5	378706	1788.09
A8	7	239020	56990.4	51415.3	377920	2000.86
A9	7	271971	66612.7	55454.9	414649	1982.85
A10	7	260498	68170.7	51651.5	393775	1986.71
A11	7	449203	106593	71637.7	548940	678.102
A12	7	375765	94424	56448.9	445784	3339.93
B1	7	245867	67436	37191.7	317065	1349.47
B2	7	324998	79189.9	48925	381698	1721.97
B3	7	267264	60687.6	41761.6	309778	1095.54
B4	7	245627	60587.7	48786.9	358298	8894.42
B5	7	356596	81868.6	66018	449852	2904.51
B6	7	237133	56754	46045.3	313115	2322.94
B7	7	248416	60412.5	53315.9	359030	2293.1
B8	7	240494	60168.3	52035.2	352294	2044.5
B9	7	230706	58582.4	49230.9	346894	1551.56
B10	7	245462	62655.1	54150.7	395842	2250.24
B11	7	413756	97830.7	74514.1	531426	4033.59
B12	7	318471	80079.8	55398.9	431276	2765.31
C1	7	327392	97691.2	49640.8	382553	2164.73
C2	7	322886	78734	53539.9	394372	2185.85
C3	7	273878	66137.5	49918.2	351784	2025.54
C4	7	242174	58420	48619.2	336129	1370.38
C5	7	385113	87134.5	70081.8	452284	2815.88
C6	7	246263	59177.6	52010.8	340494	1884.53
C7	7	252717	62957.9	61232.8	397501	2259.1
C8	7	231310	58804.1	55914.4	366855	1428.45
C9	7	225059	57972.9	51878.4	348198	1173.68
C10	7	254884	64247	60748.1	432459	2055.21
C11	7	418784	100286	81254.4	568915	4257.55
C12	7	334081	84283.4	61615.4	467116	3076.59
D1	7	355991	93655.6	57232.9	446687	2139.48
D2	7	382884	92881.5	65700.1	472174	2082.28
D3	7	319649	79135	59539.6	400370	2261.64
D4	7	298489	65746.9	59294.9	381702	2351.98
D5	7	442378	99971.6	90116.8	555533	3558.36
D6	7	292615	68366	60430.5	372672	1654.31
D7	7	288755	66149.7	70671.8	426538	3053.27
D8	7	228049	52539.7	59062.9	371656	1637.4
D9	7	233107	59349.9	59462.8	383260	2080.09
D10	7	271248	67104.8	62483.6	419963	2211.33
D11	7	429376	101673	80900.5	539834	3176.1
D12	7	350766	87168.9	63269.1	458899	3382.51
E1	7	360148	97772.1	64603.1	505092	2438.42
E2	7	394370	98175.4	76795.2	549623	2758.9
E3	7	377033	104258	76721.6	501484	2384.52
E4	7	352477	89705.3	72340	450169	2279.97
E5	7	517412	133558	96694.8	562819	2792.93
E6	7	350134	84637.1	72797.8	430543	2564.82
E7	7	381329	83941.2	85031	480369	3949.53
E8	7	297209	69702.9	77539.9	475111	2467.07
E9	7	288830	70703.4	73616.5	468336	2308.98
E10	7	311339	76372.6	68597.8	450485	2009.39
E11	7	442350	105222	84116.7	553593	3674.69
E12	7	371690	90471.8	68440.9	494671	3177.44
F1	7	340224	94169.9	59579	442370	1932.38
F2	7	398939	103870	71861	510049	2402.65
F3	7	365145	93801.6	71109.8	458256	2314.35
F4	7	345346	87196.9	77259.6	487358	2291.86
F5	7	603174	137269	117049	703639	3589.42
F6	7	366472	87818	76273.2	459349	2272.22
F7	7	308745	80498	81944.5	493701	2429.01
F8	7	312404	78404.2	78585.4	477862	2904.53
F9	7	317597	81054.4	74057.3	463879	2114.92
F10	7	351404	90584.7	78988.2	529324	1997.44
F11	7	486733	117433	94112.6	626971	2890.9
F12	7	416249	102211	76020.2	559750	3602.06
G1	7	346414	97923.1	60463.4	478700	2239.56
G2	7	432845	107826	71962.6	516127	2512.67
G3	7	426687	104506	74878.6	505389	2123.91
G4	7	391173	99164.7	78423.5	508805	2459.9
G5	7	589224	153979	109183	659245	3756.3
G6	7	379891	97914.8	78371	484102	2334.11
G7	7	316316	80629	81650	505041	2581.8
G8	7	300292	75885.1	75168.9	473948	2952.11
G9	7	318018	82891.3	78479.2	510328	2814.2
G10	7	319931	84454.2	69650.8	479314	1470.94
G11	7	475770	117901	90128	606031	4432.52
G12	7	440354	111033	80739.8	605611	3465.88
H1	7	401119	110508	62859.7	517967	1941.85
H2	7	437353	112696	71219.9	529896	2800.18
H3	7	395723	98839	68783.2	483270	2630.56
H4	7	237997	19556	10424.1	8815.51	2802.12
H5	7	445363	38674.4	21610.4	17436	4759.04
H6	7	238953	19731.4	10837.6	8633.9	2415.89
H7	7	355297	84235.6	82293.9	535874	3279.23
H8	7	328158	82990.7	71971.4	465651	2880.4
H9	7	309041	80545.5	70115.7	481189	3109.17
H10	7	303244	23603.6	12131	10274.9	2752.46
H11	7	574969	54848.1	31250.8	26779	8177.19
H12	7	489384	43728.3	23400.9	20184.9	5803.17
A1	8	283306	71763.3	38504.4	349437	821.776
A2	8	314284	76299.8	48279.9	397356	1989.66
A3	8	267733	66295.4	42730.7	343679	1367.32
A4	8	241850	56005.6	40743.3	312922	1154.12
A5	8	389783	88185.1	67695.6	487356	2328.97
A6	8	271814	60252.5	46690.2	334457	1815.78
A7	8	254161	62609.5	52922.9	378631	2016.53
A8	8	241151	57228.6	51497.3	378361	1755.94
A9	8	274392	67346.7	55656.8	414630	1904.77
A10	8	260779	68548.1	51565.8	393715	1918.27
A11	8	449362	106796	71613.7	548665	614.601
A12	8	374703	94716	56436.1	445092	3617.68
B1	8	246481	67865	37288.2	317128	1240.23
B2	8	325474	79590.7	49078.6	381915	1813.94
B3	8	266876	61280.8	41952.7	309613	1239.72
B4	8	245928	61178.9	48893.1	358730	8966.86
B5	8	356321	82026.3	65876.1	450414	3080.61
B6	8	237637	56821.9	46111.8	313032	2059.01
B7	8	251566	61009.4	53321.9	358690	2394.03
B8	8	243867	60767.7	52014	352527	1936.31
B9	8	233655	59294.8	49323.8	346951	1283.79
B10	8	246265	62971.8	54114.9	395709	2331.05
B11	8	413847	98394.9	74476.3	531255	4059.25
B12	8	317985	80387.8	55329.4	430908	2822.41
C1	8	328232	98364	49611.6	383136	1798.41
C2	8	322908	79394.5	53506.3	394142	2314.31
C3	8	274063	66322.7	49927.6	351251	2031.16
C4	8	242417	59026.6	48532.7	336156	1702.48
C5	8	385780	87442.5	69987	452498	2831.99
C6	8	246617	59440	51883.2	340904	2066.8
C7	8	254142	63234.9	61297.2	397854	2360.04
C8	8	232384	59254.1	55861.5	366700	1413.6
C9	8	226302	58091.1	52033.1	348465	1218.32
C10	8	255772	64714.7	60853.1	432663	1985.66
C11	8	418888	100632	81204	568848	3958.33
C12	8	334866	84761.5	61661.9	467432	2551.56
D1	8	355544	93973.9	57386.9	446529	2385.97
D2	8	382886	93145	66150.9	472278	2157.76
D3	8	320005	79708.5	59609.8	400572	2237.22
D4	8	298873	65929.5	59301.7	382129	2504.96
D5	8	443613	100577	90184.6	555941	3930.64
D6	8	293365	68467.4	60514.2	372929	1643.76
D7	8	289677	66606.1	70844.7	426820	3048.36
D8	8	228344	52390.7	59032	371679	1603.95
D9	8	234355	59533.7	59353.8	383143	1887.85
D10	8	271658	67705.8	62531.4	419860	2271.26
D11	8	429306	101852	80957.5	540149	3188.62
D12	8	350314	87280.6	63057.3	459282	3209.53
E1	8	360810	98060.4	64560.5	504734	1970.97
E2	8	393664	98349.7	76990.5	549808	2474.24
E3	8	377640	104726	76632.7	501757	2422.62
E4	8	353425	90049.1	72612.8	449177	2334.94
E5	8	518647	134477	96804.9	563270	3157.05
E6	8	350646	84988.1	72696.6	430458	2250.32
E7	8	381271	83715.4	85004.5	480332	3801.19
E8	8	298729	70065.9	77811.2	475222	2539.31
E9	8	290048	71139.3	73725.9	468096	2134.55
E10	8	315122	76918.5	68530.4	450624	2255.29
E11	8	446928	105761	84178.6	553437	3843.36
E12	8	373891	91317.7	68314.2	493899	3301.71
F1	8	340038	95211.2	59628.9	442329	1873.05
F2	8	400154	104208	72102.7	509576	2125.28
F3	8	365774	94432.2	70976.8	458081	2237.17
F4	8	345709	87285.6	77489.6	487135	2303.17
F5	8	604011	137875	117129	704597	3593.71
F6	8	366286	88019.7	76449.8	458953	2238.8
F7	8	310808	81094	82068.1	494048	2311.38
F8	8	314231	79078.8	78651.4	477403	3238.5
F9	8	318973	81808.7	74124.8	463467	2138.65
F10	8	362032	92383.7	78970.1	529472	2356.64
F11	8	495923	118819	94142.7	627113	2936.87
F12	8	424344	103439	75924.2	558824	3657.07
G1	8	346814	98637.8	60770.2	478249	1590.87
G2	8	433364	108567	72061.2	516006	2520.03
G3	8	426413	104756	74979.5	504948	2190.84
G4	8	391770	99215.5	78448.1	508614	2500.38
G5	8	589948	154468	109485	660210	3716
G6	8	380317	98226.9	78423	483658	2759.08
G7	8	317182	81081.6	81603.9	504049	2815.32
G8	8	300549	76225.7	75301.1	474280	2848.14
G9	8	318707	83180.6	78559	510482	2586.95
G10	8	323376	85160.2	70026.6	479330	1129.39
G11	8	479579	118732	90276.1	606074	4229.45
G12	8	442410	111750	80550.7	605816	3680.57
H1	8	400753	110380	62912.6	516915	1996.22
H2	8	437122	112676	71375.9	529882	2547.18
H3	8	396234	99072.9	68744.8	483423	2937.11
H4	8	238462	19695.9	10572.1	8880.03	2937.57
H5	8	444670	38739.5	21716.3	17419.1	4892.51
H6	8	238503	19752.6	10678.8	8964.24	2649.17
H7	8	355119	84475.5	82301.6	535887	3026.02
H8	8	328205	82960.1	72048.3	465464	2914.72
H9	8	309439	80484.1	70148.6	481571	2839.36
H10	8	303212	23795.9	12051.6	10417.9	3026.59
H11	8	572680	54785.3	31088.6	26755	7951.3
H12	8	487098	43687.5	23155.5	20047.3	5776.6
A1	9	283188	72068.6	38366.8	348409	871.316
A2	9	313893	76491.2	48220.9	397378	2333.66
A3	9	267703	66676.8	42872.8	343174	1417.35
A4	9	242307	56233	40863.6	312900	1146.32
A5	9	390425	88569.6	67820.5	487611	2350.84
A6	9	272330	60311.5	46840.7	334160	1753.17
A7	9	258238	63437	53046.7	379051	2038.24
A8	9	244818	57836.9	51478.3	378208	2146.98
A9	9	279095	68207.3	55643.4	414431	2210.34
A10	9	261662	68567.4	51588.7	393550	1897.14
A11	9	449771	107149	71548.5	549086	354.926
A12	9	374921	94873.7	56353.8	444881	3794.56
B1	9	246656	67704.9	37356.1	316959	1562.61
B2	9	325467	79653.8	49184.1	382123	1904.81
B3	9	267626	61382.6	41931.4	310020	1402.53
B4	9	246826	61297	48875.8	358516	8942.71
B5	9	356660	82273.9	66057.7	449997	2879.23
B6	9	238302	57403.6	46098.2	313324	2038.83
B7	9	256544	61649.9	53292	358910	2240.35
B8	9	249727	61644	52146.6	352567	1727.08
B9	9	239160	59957.5	49617.3	347089	1548.27
B10	9	246309	63003.2	54173.9	395412	2277.18
B11	9	413994	98563.8	74736	530873	4169.07
B12	9	318109	80510.5	55553.6	430488	2910.86
C1	9	327776	98732.1	49765.1	383068	2237.25
C2	9	323951	79508.9	53425.5	393634	2110.23
C3	9	274982	66481.8	49992.3	350850	2035.84
C4	9	243010	59061.5	48645.4	335907	1646.81
C5	9	386421	87970.1	70205.2	452188	2581.37
C6	9	246833	59747.4	52074.2	340836	2210.53
C7	9	255492	63876.2	61353.7	397629	2203.3
C8	9	234018	59389.6	56017.2	366446	1404.53
C9	9	227654	58426.9	51980.2	348308	940.599
C10	9	256629	65062.1	60934	432547	2061.29
C11	9	420047	101109	81419.4	568468	4266.74
C12	9	334969	84935.1	61429.5	467135	3129.31
D1	9	357136	94283.7	57438.2	446197	2308.32
D2	9	383482	93488.8	66103.2	471716	1961.51
D3	9	320571	80315.5	59809.3	400416	2217.89
D4	9	299167	66673.6	59331.7	382174	2396.39
D5	9	443894	101075	90422.4	556350	3724.82
D6	9	293600	68920.6	60661.6	372889	1938.35
D7	9	290874	66943.1	70752.4	427108	2753.64
D8	9	228680	52886.4	59072.9	371593	1465.13
D9	9	234831	60044.6	59513.1	382869	1999.15
D10	9	272472	68087.9	62599.5	419842	2420.21
D11	9	430000	102398	81008.7	540386	3300.33
D12	9	350522	87658.6	63076.6	459040	3279.71
E1	9	361011	98348.8	64636.3	504548	1895.79
E2	9	393657	98522.8	77018.5	549936	2492.46
E3	9	378689	105493	76851.1	501455	2325.72
E4	9	354280	90439.4	72669.1	449053	1827.79
E5	9	519993	135476	96873	562956	2893.62
E6	9	351739	85521.6	72905.9	430517	2337.25
E7	9	382239	84015.8	84958.3	481054	3581.61
E8	9	300954	70804.5	77802.1	475391	2617.64
E9	9	291784	71415.9	73888.2	468491	2100.58
E10	9	321789	78339.6	68831.1	450826	2345.03
E11	9	454011	107133	84176.8	552752	3815.54
E12	9	379774	92171.6	68276	493037	3166.88
F1	9	340532	95625.2	59715.1	441842	1828.56
F2	9	401131	104826	72197	509823	1879.52
F3	9	367060	94946.9	71141.8	458210	2246.56
F4	9	347130	87866.2	77314.3	486451	1830.2
F5	9	606137	138223	117261	703791	3817.72
F6	9	367115	88449.4	76460.3	458768	2220.34
F7	9	314174	81786.9	82073.8	494283	2183.24
F8	9	317248	79453.2	78704.4	477413	2991.56
F9	9	322950	82469.6	74118.4	463542	2462.19
F10	9	381526	95075.2	79247.6	530113	2331.06
F11	9	514391	121511	94119.8	627786	3213.7
F12	9	441231	106145	75951.8	559165	3457.67
G1	9	346922	98708.6	60621.4	477349	2337.39
G2	9	434043	108827	72063.7	516321	2675.85
G3	9	427313	105484	75031.1	505365	2256.5
G4	9	392782	99907.2	78559.4	508790	2628.7
G5	9	591007	154938	109522	659763	3552.89
G6	9	381132	98936.5	78697.8	484222	2542.43
G7	9	318684	81776.2	81848.4	505147	2708.84
G8	9	301623	76577.5	75401.5	473988	2578.97
G9	9	319532	83899.8	78709.4	510835	2467.24
G10	9	329190	86327.8	69989.6	479156	1260.34
G11	9	484895	120193	90235.7	606361	3905.5
G12	9	448094	112897	80538.9	604916	2967.41
H1	9	401870	111332	62663.4	516637	2575.55
H2	9	437369	113035	71378.2	529296	2528.86
H3	9	396370	99351	68474.4	483013	2871.76
H4	9	238476	19090.8	10352.9	8853.46	2868.9
H5	9	445591	38867.7	21635.3	17520.4	4880.74
H6	9	238612	19609.5	10896.2	8786.5	2508.84
H7	9	356594	85042	82365.1	535375	3277.3
H8	9	328589	83526.9	72067.8	465085	2962.96
H9	9	310692	81375.7	70359.1	481793	2898.25
H10	9	303777	23754.6	12185.7	10208.3	2901.87
H11	9	572331	54602.4	31144.9	26948.8	7848.99
H12	9	485907	43310.2	22865.4	19726.1	5858.09
A1	10	282797	72214.7	38432.6	347480	1215.18
A2	10	313893	76557.7	48414.4	396768	2157.42
A3	10	268298	67035.5	43063.6	343945	1632.16
A4	10	242220	56491.5	40837.9	312510	1198.34
A5	10	390836	88790.2	67872.8	487457	2478.83
A6	10	272798	60581.9	46970.6	334691	1876.79
A7	10	264318	64431.5	52998.4	378902	1899.89
A8	10	251712	58804.5	51588.4	378371	2078.07
A9	10	286703	69267.8	55771.6	414658	2032.97
A10	10	261887	68934.7	51567.8	393598	1999.8
A11	10	450459	107693	71529.1	547905	898.088
A12	10	375442	94838.1	56179.2	444372	3204.51
B1	10	246814	67947.3	37333	317224	1476.02
B2	10	326051	79694.7	49192.2	381285	2131.97
B3	10	267871	61355.4	41937.5	309727	1409.39
B4	10	246734	61325	49012.1	358755	8913.39
B5	10	356773	82447.2	66130.3	450033	2982.03
B6	10	238769	57459.2	46148.6	313331	2142.95
B7	10	266016	62921.5	53469.2	358682	2325.98
B8	10	259512	62923.1	52101.1	352552	2134.39
B9	10	249103	61470.9	49379.7	347001	1490.78
B10	10	246528	63081.2	53947	395505	2294.24
B11	10	414432	98837.1	74618.4	531254	4075.68
B12	10	318386	81213.8	55386.6	431083	2886.23
C1	10	328869	99192.2	49935.6	383402	1527.97
C2	10	324155	79991.7	53569.3	393448	1992.13
C3	10	275315	66868.1	49923.8	350942	1929.08
C4	10	243542	59322.8	48671.6	336258	1615.55
C5	10	387052	88059.2	69998.7	452532	2545.57
C6	10	247351	60161.2	52114.4	340962	1878.1
C7	10	257230	64183.5	61438.1	398072	2145.86
C8	10	235531	59998.7	56065.3	366615	1387.21
C9	10	228834	58932.6	52188.6	348105	1405.11
C10	10	257307	65514.5	60939.1	432581	2215.17
C11	10	420385	100929	81324.8	568483	3873.56
C12	10	335042	85192.1	61575.6	466588	2792.11
D1	10	357328	94626.7	57591	445751	2360.08
D2	10	383681	93389	66057.5	472509	1847.79
D3	10	321272	80622	59822.4	399841	2358.29
D4	10	299844	66490.1	59458.5	381810	2532.6
D5	10	444904	101288	90369.3	555905	3694.56
D6	10	294428	69081.3	60777.6	373360	1709.01
D7	10	291896	67293	70866.1	426549	2969.76
D8	10	229008	52787.6	59090.4	371471	1820.54
D9	10	235545	60350.3	59598.6	382854	1840.63
D10	10	272318	67936.1	62748.2	420313	2121.43
D11	10	430025	102697	81000	540567	3309.96
D12	10	351721	87681.1	63096.8	458873	3270.81
E1	10	361956	98533.3	64692.2	504174	2189.66
E2	10	393726	98635.6	77136.8	549843	2961.58
E3	10	379419	105759	77132.5	501485	2455.29
E4	10	355760	90753.6	72750.8	449279	2288.94
E5	10	522357	136167	97013.1	562610	3006.52
E6	10	352264	85951.8	73057.7	430271	2337.25
E7	10	383763	84325.7	85206	480676	3707.5
E8	10	302995	71071.4	77918.1	475680	2367.37
E9	10	294714	72168.4	73869	468707	2167.6
E10	10	334325	79706.6	68692.7	451082	2112.59
E11	10	467030	108916	84236.9	553577	3648.68
E12	10	390609	93881.9	68218.9	493305	3235.11
F1	10	340876	95878.3	59941.9	441449	1674.33
F2	10	401256	105347	72043.8	509738	2124.11
F3	10	367130	95045.9	71320.5	458630	2057.78
F4	10	347793	88018	77570.7	486244	2253.81
F5	10	605590	138820	117445	702719	3434.02
F6	10	367700	88916.2	76446.3	458621	2341.69
F7	10	319276	82646.2	81792.5	493580	2341.03
F8	10	323128	80504.2	78848.3	477207	2877.2
F9	10	328115	83139	74208.3	464072	2565.73
F10	10	415782	99224.2	79129.6	529792	1929.22
F11	10	547488	125466	94233	627477	2954.24
F12	10	470368	110106	75919.8	559219	3919.21
G1	10	348054	98937.5	60784.1	477832	2021.32
G2	10	434143	108631	72411.8	516814	2641.49
G3	10	428626	105821	74951.7	505208	2213.57
G4	10	393762	100517	78526.9	508978	2321.71
G5	10	591921	154769	109598	660540	3521.23
G6	10	382114	99419.4	78548.1	483817	2271.15
G7	10	319532	82013.7	81843.8	505286	2695.76
G8	10	302355	76776.2	75425.6	474742	2603.26
G9	10	321032	84378.3	78636.7	510816	2487.53
G10	10	338046	87368.8	70027.7	479180	1183.95
G11	10	495476	121607	90496.4	606856	4169.01
G12	10	458784	115201	80338	604792	3530.04
H1	10	401449	111342	62900.7	515538	2480.41
H2	10	437634	113119	71108.1	528852	2747.52
H3	10	396808	99440.7	68804.9	483198	2636.5
H4	10	238017	19511.5	10301.3	9202.62	2755.09
H5	10	445761	39064	21726.3	17415.1	4837.55
H6	10	237988	19738.5	10788.8	8883.45	2338.13
H7	10	356565	85123.9	82491	534819	3026.98
H8	10	328595	83391.2	72279	464891	2924
H9	10	310655	81415.6	70208.1	481358	3023.52
H10	10	303209	23776.5	12271.3	10445	3067.34
H11	10	571730	54508.1	30781.7	26553.1	8084.18
H12	10	484571	43306.1	22898.9	20317	5881.11
A1	11	282732	72234.4	38420.6	347131	990.794
A2	11	313972	76549.7	48321.5	397585	2384.62
A3	11	268231	67155.7	42915.4	343714	1433.04
A4	11	242458	56761.5	40918.4	312495	1494.89
A5	11	391466	88965.4	67861.4	487774	2511.23
A6	11	273245	60832	46906.1	334596	1827.02
A7	11	276304	65849.2	53181.7	378836	2047.09
A8	11	264221	60659.1	51665.5	378536	1992.56
A9	11	300863	71112.8	55820.4	414718	2238.3
A10	11	262334	69382.9	51593.7	393192	2129.63
A11	11	450714	108438	71409	548190	799.435
A12	11	375259	95323.4	56166.4	443335	3274.98
B1	11	246849	68269.1	37383.3	317410	1497.34
B2	11	326008	80358.5	49258.7	381154	2230.59
B3	11	267639	61425	41942.6	309896	1584.95
B4	11	247133	61590.9	48912	358712	8833.19
B5	11	357549	82734.5	66154.8	449720	2717.45
B6	11	238927	57820.8	46223.9	313398	2099.37
B7	11	282788	64478.8	53380.2	358553	2269.4
B8	11	278500	65052	52283.2	352386	1879.03
B9	11	267479	63289.7	49410.1	346766	1425.89
B10	11	247387	63397	54281.1	395399	2056.28
B11	11	414209	98928.8	74630.7	531153	3890.93
B12	11	318207	81193.7	55307	430524	2751.88
C1	11	329292	99686.1	49824.7	382654	1811.93
C2	11	324387	80203.1	53620.7	393412	2281.16
C3	11	275703	67217.1	50036.4	350861	1985.27
C4	11	243663	59532.2	48684.3	336507	1813.83
C5	11	387890	88291	70251.7	451771	2708.47
C6	11	247888	60536.2	52134.4	340795	1760.87
C7	11	260290	64846.8	61419.8	397420	2224.64
C8	11	238414	60375.4	56184.3	366981	1410.3
C9	11	231694	59349.3	52099.1	348133	1058.79
C10	11	258267	65667.9	60988.2	432590	2057.82
C11	11	420962	101493	81453.7	568481	4026.75
C12	11	335405	85381.9	61687.3	467250	3204
D1	11	356692	94780.9	57620.9	446493	2231.91
D2	11	384217	93893.4	66241.3	472020	1799.48
D3	11	322041	80832.6	59803.3	400412	2699.11
D4	11	300491	66741.7	59410.1	381959	2572.07
D5	11	445386	101500	90799.6	556321	3545.24
D6	11	294779	69376.5	60749	373306	1912.44
D7	11	293048	67763.3	70987.5	426814	2992.36
D8	11	229298	52831.3	59077.9	371366	1515.31
D9	11	236885	60427.8	59578.5	382801	2046.37
D10	11	272570	67965.2	62631.4	420072	2219.26
D11	11	430416	102830	81157.5	540405	3613.31
D12	11	351189	87818.6	63075.6	458549	2996.02
E1	11	362434	99675.8	64653.6	504007	2437.06
E2	11	393582	98880.2	77110	550136	2575.58
E3	11	379895	106373	77012.7	501530	2278.9
E4	11	356238	91249.8	72781.7	449557	2210.4
E5	11	523170	136562	97173.2	562776	2846.83
E6	11	353226	86138.9	73072.3	430108	2290.36
E7	11	385324	84700.7	85251.2	480777	3990.52
E8	11	307633	71749.2	77883.8	475416	2825.18
E9	11	299039	72795.3	74053.2	469061	2417.32
E10	11	357647	82713.3	68997	450714	2219.39
E11	11	491793	112011	84327.1	554675	3833.49
E12	11	411915	96882.3	68293.4	492805	3126.27
F1	11	341818	95846.5	60144.5	441749	2131.1
F2	11	402851	105096	72155.8	509251	2002.4
F3	11	367372	95416.4	71216.2	458476	1981.64
F4	11	348133	88546.3	77492.7	486369	2339.16
F5	11	606843	139116	117482	702455	3576.56
F6	11	368845	89090.1	76423.6	458810	2280.13
F7	11	330021	83513.7	82076.6	493072	2454.83
F8	11	332304	81452.5	78797.3	476765	3257.72
F9	11	337762	84579.7	74092.7	463525	2346.79
F10	11	476056	106083	79052	529501	2033.68
F11	11	604728	132981	94095.9	628327	2512.94
F12	11	524326	117830	75901.1	558800	3779.11
G1	11	348236	99220.7	60994.8	477226	1584.85
G2	11	435476	109024	72320.7	516858	2418.2
G3	11	428282	105691	75089.1	506164	2377.72
G4	11	394718	100739	78738.8	509405	2443.12
G5	11	593048	155396	109587	659750	3942.43
G6	11	382885	99944	78801.8	484402	2519.28
G7	11	320353	82196.3	82040.4	504547	2887.25
G8	11	302800	77090.2	75627.4	473962	2578.97
G9	11	321255	84545.2	78923.6	510905	2773.62
G10	11	355687	90035.7	70063.5	479122	1045.37
G11	11	515605	124530	90361.8	606590	4309.23
G12	11	479779	118198	80460.7	604002	3502.9
H1	11	400671	111103	62711.2	514968	2256.15
H2	11	438113	113591	71510.9	528966	2602.13
H3	11	396935	99337.1	68824.1	483304	2453.53
H4	11	238322	19511.5	10473.7	8891.41	3192.48
H5	11	445769	38842.7	21724.3	17201.5	4832.65
H6	11	238469	19683.7	10868.7	8596.19	2114.69
H7	11	357306	85626.9	82379.5	535331	2945.8
H8	11	328664	83159.9	72175.2	464944	3035.32
H9	11	312159	81606.2	70329.3	481339	2670.2
H10	11	303737	23913.3	12379.4	10224.3	2688.25
H11	11	570187	54443.9	30901	26529	7507.49
H12	11	483280	43346.9	23051.4	20049.1	5960.83
A1	12	283266	72447.7	38363.8	346693	1490.56
A2	12	314599	76677	48364.1	396971	2063.98
A3	12	268727	67293.6	43066.6	343469	1378.11
A4	12	242317	56694	40916.6	312599	1239.1
A5	12	391760	89171.4	67942.2	487704	2404.3
A6	12	272880	60874.8	46906.9	335094	1421.64
A7	12	297989	68583.4	53270.2	379102	2085.7
A8	12	287408	63214.3	51662.2	378151	2009.16
A9	12	327514	74512.3	56007	414651	1999.24
A10	12	263949	69402.1	51627.6	393701	2067.23
A11	12	452237	108203	71710.8	547677	768.818
A12	12	376276	95377.5	56162.1	443333	3093.96
B1	12	247009	68471.9	37213.4	317070	1137.66
B2	12	325844	80030.1	49211.6	381592	1915.89
B3	12	268463	61634.8	41994.4	310387	1311.31
B4	12	247252	61663.1	48979.4	358585	9160.89
B5	12	357196	82959.8	66187.7	450226	2798.34
B6	12	239204	57609.1	46247.9	313868	2223.67
B7	12	313355	67794	53616.6	358447	2355.8
B8	12	311452	68710.5	52276.9	352330	2024.61
B9	12	300796	67150.2	49616.5	346862	1559.77
B10	12	247377	63382.6	54374	395149	2343.62
B11	12	414840	99167.6	74668.5	531038	4139.31
B12	12	318932	81244.5	55539	430404	2981.39
C1	12	329427	100093	50156	382293	1931.17
C2	12	324997	80095.2	53516.8	393518	2278.05
C3	12	275865	67256.2	50133.1	350784	1865.4
C4	12	244182	59581.3	48695	336533	1629.22
C5	12	388345	88611	70443	452130	2501.71
C6	12	248307	60598.3	52140.9	341126	1913.43
C7	12	265347	65463.8	61633	397732	1963.69
C8	12	243068	60908.8	56273.1	366967	1740.2
C9	12	235692	59990.7	52225.3	348345	917.456
C10	12	258989	65911.1	61093.1	432501	2086.5
C11	12	420889	101877	81286.6	568635	4146.23
C12	12	335634	85684.1	61760.3	466423	2683.37
D1	12	357564	95191.8	57585.1	445762	2113.6
D2	12	384415	93937.7	66109.3	471701	1939.37
D3	12	322174	80938.4	59900.6	400158	2199.58
D4	12	301310	66880.8	59556.2	382482	2203.93
D5	12	445584	101588	90594.3	557130	3884.23
D6	12	295186	69879.1	61009.6	373024	1867.34
D7	12	294360	68071.6	70957.4	426749	2902.96
D8	12	230696	52874.2	59181.3	371561	1354.74
D9	12	238425	60850.5	59626.2	382677	2121.41
D10	12	273921	68250.2	62896	419955	2369.97
D11	12	430996	103106	81184.6	540759	3105.79
D12	12	351765	87997.9	62957	458956	3504.09
E1	12	362943	99498.1	64661.6	504090	2141.82
E2	12	393839	98561.9	76951.5	549968	2747.51
E3	12	380929	106470	77147.5	501822	2440.05
E4	12	356918	91508.9	72867.9	449490	2092.59
E5	12	524166	137606	97222.3	562778	2908.88
E6	12	353785	86472.4	73106.3	429869	2450.54
E7	12	388777	84817.9	85302.4	481063	3353.25
E8	12	314730	72779.2	78000.8	476027	2723.45
E9	12	306402	73687.9	73932.8	468924	2592.67
E10	12	397073	87205.5	68843.6	450573	1822.72
E11	12	535564	117244	84404.5	552840	3908.85
E12	12	450101	101796	67940.4	492138	3082.41
F1	12	341639	96265.2	59855.7	441897	1979.83
F2	12	403885	105900	72415.1	509439	2098.37
F3	12	368298	95476.4	71264.1	458058	2083.85
F4	12	348812	88927.8	77555.5	485977	2196.24
F5	12	608267	139313	117280	703379	3893.81
F6	12	369041	89294.4	76398.2	458096	2127.13
F7	12	347061	85608	82037.9	492820	2758.93
F8	12	349668	83166.3	78644.4	477057	3222.3
F9	12	354519	86356.7	74276.9	463281	2204.43
F10	12	572991	116948	79379.5	529636	1987.85
F11	12	697282	144283	94142.7	627522	2980.8
F12	12	609063	129500	75719.9	559316	3725.82
G1	12	349187	99194.4	60990.2	477814	2417.16
G2	12	435564	109568	72438	516572	2453.78
G3	12	429595	106174	75251.6	506154	2185.79
G4	12	395159	101077	79021.5	509046	2463.85
G5	12	594054	155226	109516	659386	3774.53
G6	12	383196	100386	78900.4	484051	2685.01
G7	12	321520	82660.6	82096.7	504618	2791.04
G8	12	304251	77432.7	75572.3	474222	2725.7
G9	12	322183	84870.9	78956.9	510495	2468.25
G10	12	386900	93599.6	70046.1	479191	1281.07
G11	12	552635	129194	90441.3	606846	4671.86
G12	12	518820	123990	80421.5	603588	3639.86
H1	12	400629	111140	62827.3	513694	1977.53
H2	12	437337	113792	71431.8	528934	2740.65
H3	12	397279	99851.6	69024.8	482467	2868.19
H4	12	238233	19395.2	10452.2	8817.4	2962.02
H5	12	445628	38738.5	21802.3	17780.8	4705.06
H6	12	238366	19730.5	10815.5	8825.1	2401.59
H7	12	357948	85896.7	82452.6	534514	3333.35
H8	12	329140	83282.5	72359.6	464632	2843.29
H9	12	312449	81949.7	70369.7	481467	2923.95
H10	12	304177	23740.4	12421.6	10293.4	2954.97
H11	12	569733	54378.1	30984.1	26851.2	8068.23
H12	12	481575	43045.1	22915.6	19676.6	5983.86
A1	13	282864	72654.5	38330.9	346467	1165.64
A2	13	313821	76450	48487.6	397007	2327.29
A3	13	269186	67744.5	43059.5	343572	1423.23
A4	13	242679	57032.5	40954.6	312519	1127.24
A5	13	391653	89207.1	68184.7	487488	2458.58
A6	13	272946	61194.8	47125.9	334716	1675.31
A7	13	337449	72599.2	53302.3	379324	1813.02
A8	13	329330	67956.2	51654.7	377825	2006.67
A9	13	374964	79786.4	55839.5	414585	2308.67
A10	13	265727	69813	51639.6	393332	2183.97
A11	13	453983	108867	71729.1	547356	565.841
A12	13	377834	96264.5	56160.7	442938	3302.62
B1	13	246746	68828.9	37274.6	316668	1533.3
B2	13	325821	80849.3	49254.1	381296	2042.21
B3	13	267939	61892.1	41979.2	310474	1309.35
B4	13	247657	61678.4	49071.7	358912	9192.8
B5	13	357955	82799.7	66323.7	449431	2636.55
B6	13	239636	57949	46317.6	313265	2007.35
B7	13	366320	72930.4	53615.8	358748	2313.75
B8	13	368949	74761	52237.7	352719	1822.55
B9	13	358603	73370.9	49535.1	346493	1347.04
B10	13	247177	63447.2	54296.3	395044	2082.32
B11	13	414245	99174.9	74720.6	531144	3816.01
B12	13	318869	81472.2	55315.9	430246	2810.1
C1	13	329788	100211	50048.9	381889	1514.45
C2	13	324513	80473.4	53594.5	393619	2470.74
C3	13	276579	67649	50056.1	350494	2065.8
C4	13	244566	59654.9	48979.7	336146	1541.32
C5	13	389653	88976.9	70367	452439	2515.14
C6	13	248060	60576.6	52155.3	341319	1889.35
C7	13	273701	66285.7	61720.6	397738	2110.58
C8	13	251223	61797.6	56233.2	366204	1632.16
C9	13	242904	60903.5	52107.2	347822	1023.25
C10	13	259785	66302.5	61141.3	432519	2105.63
C11	13	421332	102202	81555.3	568169	4242.23
C12	13	336072	85972.3	61544.6	466337	3109.54
D1	13	357294	95175.8	57675.8	445630	2329.27
D2	13	384594	93752.4	66277.8	471676	2076.24
D3	13	322159	81195.4	60050.9	400038	2451.89
D4	13	300707	67308.7	59689.8	382485	2275.98
D5	13	446847	102066	90795.7	556509	3745
D6	13	295459	69746.3	60957.3	373321	1804.01
D7	13	296920	68310.4	70973	426853	2995.31
D8	13	232347	53216	59175.5	371605	1458.44
D9	13	240545	61262.6	59798	382712	2249.57
D10	13	275387	68558.2	62938.5	419685	2035.06
D11	13	432808	103597	80996.2	540429	3164.54
D12	13	352267	88693.7	63047.2	458681	3332.1
E1	13	363194	99436.6	64815.9	504318	1957.3
E2	13	393142	98684.8	77159.1	549452	2949.05
E3	13	381963	107358	77351.9	501468	2416.09
E4	13	357148	91682.4	72976.1	448545	2255.28
E5	13	524842	137907	97266.3	561817	3163.15
E6	13	354278	86554.4	73179.3	429205	2319.67
E7	13	395065	85300.6	85319.1	481046	3698.72
E8	13	329141	74132.9	78155.1	475722	2689.87
E9	13	320648	75165.6	74097.8	468922	2072.12
E10	13	466298	94689.3	68935.8	450896	2060.54
E11	13	611606	126663	84189.5	553859	4163.64
E12	13	515952	111279	68022.5	492645	3007.69
F1	13	342148	96273.2	59946.4	441341	2101.44
F2	13	403626	106283	72484.7	509821	2294.98
F3	13	368251	95902.7	71448.2	457983	2216.31
F4	13	349549	89169.3	77674.1	485154	2791.56
F5	13	608384	139104	117561	702393	3650.52
F6	13	369194	89688.6	76553	458073	2310.03
F7	13	379503	89080.9	82047.4	492489	2249.22
F8	13	382631	86764.9	78881.3	476714	3039.13
F9	13	386589	89900	74154.8	463982	2506.41
F10	13	712361	131999	79296.6	530057	2110.42
F11	13	832483	160575	94085.6	625734	2977.73
F12	13	736536	146393	75585.7	558703	3675.12
G1	13	348853	99736.2	60680.3	477530	1706.76
G2	13	436032	109794	72421.8	516908	2419.43
G3	13	429414	106564	75339.9	506282	2512.83
G4	13	396069	101454	78816.6	508569	2355.27
G5	13	593785	155463	109809	660888	3741.91
G6	13	384055	100566	78811.9	484133	2515.58
G7	13	322784	83158.1	82030.2	504899	2981.59
G8	13	305309	77905.6	75570.4	474569	2635.33
G9	13	323473	84952.8	79005.4	511148	2721.88
G10	13	441481	100569	70155.8	479153	1319.26
G11	13	616775	137865	90501.3	607219	4303.19
G12	13	589033	134403	80452.8	603790	3340.03
H1	13	400537	112170	62726.5	513604	1875.6
H2	13	438063	113982	71622.7	528798	2534.59
H3	13	397628	100034	69094.5	482848	2483.23
H4	13	238536	19467.1	10309.8	9043.22	2817.17
H5	13	445772	38962.9	21711.3	17467.8	4847.37
H6	13	238138	19687.2	10701.9	8912.18	2417.68
H7	13	358834	86078.8	82674.7	534825	3183.55
H8	13	329284	83338.3	72218.8	464934	3029.75
H9	13	313116	82040.1	70388.8	481503	2963.56
H10	13	303538	23895.3	12268.8	10361.2	2996.96
H11	13	568496	54432.4	30704	26276.4	8326.01
H12	13	481463	42914.5	22865.4	19203.2	5516.2
A1	14	282373	72552.8	38223.1	344983	875.687
A2	14	314662	76644.9	48373.9	396265	2346.4
A3	14	269083	67768.4	43166.1	343019	1290.82
A4	14	242947	56701.1	41049.3	312255	1201.81
A5	14	392740	89337.7	67921.8	487234	2451.29
A6	14	273493	61262.4	47004.8	334981	1483.45
A7	14	402654	79323.2	53229.2	379271	1829.11
A8	14	399172	75557.4	51841.9	378309	2103.81
A9	14	453752	88938.8	55757.3	414747	2214.2
A10	14	269119	70254.1	51642.6	392928	2224.23
A11	14	458021	110013	71593.1	547710	348.123
A12	14	380520	96567.4	56078.4	441873	3822.2
B1	14	247748	68648.2	37509.6	316038	1292.19
B2	14	326995	80793.2	49257.5	380842	2305.94
B3	14	268769	61824.5	42051.3	309598	1420.18
B4	14	248072	61826.2	49052.7	358438	8874.59
B5	14	358012	83204.2	66221.5	449505	2840.47
B6	14	239718	58258.8	46389.6	313454	2264.83
B7	14	448650	80927.6	53449	358848	2264.81
B8	14	458933	83706.1	52181.2	352767	1884.6
B9	14	448968	82804.1	49485.8	346962	1632.87
B10	14	247936	63338.7	54305.2	394972	2195.46
B11	14	414811	99334.5	74633.7	531309	3919.67
B12	14	319300	81578.4	55443.7	430191	3041.84
C1	14	329962	100575	50179.2	381934	1649.67
C2	14	325600	80495.2	53608.1	393341	2291.52
C3	14	276803	67489.8	50200.6	350546	2126.67
C4	14	244821	59938.9	48780.5	336573	1631.18
C5	14	390055	88957	70470.7	452725	2633.29
C6	14	248396	60609.9	52244.4	341183	1969.64
C7	14	289281	67849	61656.1	397711	2166.38
C8	14	265789	63495.7	56299.2	366477	1526.59
C9	14	256292	62129.9	52252.1	348334	1214.18
C10	14	261457	66560.9	61203.3	432792	2060.42
C11	14	423191	102376	81485.9	568709	4055.34
C12	14	336879	86334.6	61713.9	466429	2674.58
D1	14	357563	95248.6	57669.8	445205	2372.41
D2	14	383891	93868.7	66090	471892	1949.44
D3	14	322987	81624.5	60155.2	400081	2448.83
D4	14	301229	67326.8	59740.1	382455	2405.28
D5	14	446902	102216	90802.6	557273	3834.79
D6	14	295540	69915.9	61112.3	373253	1791.53
D7	14	300997	68985.3	71082.7	426701	2964.85
D8	14	235681	53382.9	59309	371010	1511.96
D9	14	244387	61679.5	59785.5	382178	1885.32
D10	14	277129	68687.1	62955.3	419842	2524.21
D11	14	433348	102758	80970.1	540835	3460.19
D12	14	354518	88617.5	63136.4	458387	3272.79
E1	14	363711	100001	64920.9	504240	2080.32
E2	14	393503	98149.8	77363.3	550136	2453.75
E3	14	381364	107837	77487.8	501417	2277.81
E4	14	358005	92041	73004.8	449178	2186.84
E5	14	526319	138280	97535.6	562116	3249.6
E6	14	354032	87098	73193	429728	2371.43
E7	14	405744	86539.1	85370.2	480284	3773.87
E8	14	353562	76831.5	78238.8	475545	2618.66
E9	14	344744	77615.1	74034.9	469141	2267.67
E10	14	567639	105510	68766.4	450591	1949.26
E11	14	723093	139403	84122.1	553250	3854.12
E12	14	613459	124063	67904	491507	3100.28
F1	14	342184	96897.4	59839.1	440948	2449.95
F2	14	404444	106070	72675.6	509265	2060.92
F3	14	369330	96391.2	71438.6	457882	2138.09
F4	14	349869	88964.3	77652.8	485648	2430.66
F5	14	609586	139261	117611	701207	3755.55
F6	14	369814	89772.2	76659.7	457794	2138.56
F7	14	435956	94731.2	82028.5	493044	2654.69
F8	14	437511	92061.7	78673.4	476805	2801.3
F9	14	439343	95254.3	74260.8	463436	2246.49
F10	14	869776	148817	79196.6	529799	2036.88
F11	14	986343	178137	93827	628818	2916.44
F12	14	878189	165067	75490.7	558001	3344.22
G1	14	349546	100375	61149.7	477435	2188.39
G2	14	436925	109956	72500.4	517358	2408.39
G3	14	429892	106523	75263	505787	2357.52
G4	14	396824	101539	79048.1	509086	2409.56
G5	14	594959	155327	109788	659150	3751.5
G6	14	384469	100906	78904.1	483838	2613.72
G7	14	324993	83242.7	82158.5	504487	2725.65
G8	14	307743	77959.6	75652.5	474361	2833.56
G9	14	325389	85382.7	78877.1	511322	2727.96
G10	14	525888	109549	70158	478817	1465.48
G11	14	718294	150471	90560	607063	4436.15
G12	14	698123	149168	80099.3	603240	3389.39
H1	14	400971	111561	62432.9	512545	2398.86
H2	14	438070	113910	71564.5	529353	2637.62
H3	14	397275	100126	68931.1	483290	2764.83
H4	14	239013	19495.5	10610.5	8774.71	2961.08
H5	14	445506	39150.2	21718.3	17592	5014.21
H6	14	238182	19802.9	10789.7	8559.39	2255.01
H7	14	359092	86661.7	82545.8	533904	2854.95
H8	14	329564	83042.8	72288.2	464467	3094.69
H9	14	313825	82380.4	70388.8	481011	2749.43
H10	14	303686	23709.4	12208	10225.6	3339.01
H11	14	568148	54256.7	30637	26530.4	7903.46
H12	14	480574	43408.1	22618.2	19373.8	6224.77
A1	15	282662	72733.3	38390.7	344892	1188.95
A2	15	313902	76691.9	48337.9	396477	2293.32
A3	15	269859	67974.7	43031.1	343712	1451.68
A4	15	242785	56828.2	41043.1	312613	1140.25
A5	15	392731	89579.4	68005.9	487013	2239.86
A6	15	273403	61178.5	47157	334806	1485.86
A7	15	499317	88927.6	53082.9	379326	1991.59
A8	15	503320	86154.8	51657.2	378310	2239.14
A9	15	570866	101795	55770.7	414647	2379.03
A10	15	274255	71072.7	51661.5	392616	2010.87
A11	15	465322	110669	71710.8	547257	712.121
A12	15	386000	97431.2	56077	442274	3276.37
B1	15	247429	68999.3	37462.1	315980	1362.79
B2	15	326903	80879.7	49248.3	380116	2302.61
B3	15	268183	62185.6	42235.4	310082	1160.27
B4	15	247983	62120.1	49147.6	358411	8908.22
B5	15	357835	83096.9	66298.3	449525	2920.52
B6	15	239836	58415.6	46303.9	313194	2148.6
B7	15	559449	91102.3	53461.8	358673	2179.94
B8	15	579727	95496.2	52225.9	352657	1935.51
B9	15	570338	95063.2	49339.4	346884	1681.33
B10	15	247857	63655.3	54240	394490	2607.62
B11	15	414790	99798.6	74563.2	530517	3911.46
B12	15	319620	81828.6	55484.1	429583	2895.18
C1	15	329917	100433	50128	382007	1815.62
C2	15	325446	80615.1	53512.6	392681	2190
C3	15	277082	67680.6	50138.7	350548	1982.46
C4	15	245331	59968.1	48822.3	336003	1555.97
C5	15	390062	89100.6	70266	452114	2919.71
C6	15	249033	60735.7	52308.6	340943	2042.71
C7	15	317474	70786.6	61524.8	397348	2195.92
C8	15	291703	66064.5	56369.3	366497	1402.06
C9	15	279260	64623.2	52197.6	348376	1303.45
C10	15	264243	66867.6	61273	432423	1937.84
C11	15	426056	102873	81479.8	568126	4509.8
C12	15	339317	86325.4	61640.9	466750	2660.3
D1	15	357149	95388	57620.9	444671	2397.06
D2	15	383354	94214.6	66336.7	471390	2162.8
D3	15	322849	81810.4	59953.7	400292	2420.35
D4	15	301402	67530.3	59649.1	381954	2076.61
D5	15	447197	102037	90736.8	556791	3712.72
D6	15	296345	70064.9	61079	373592	1805.93
D7	15	307650	69660.2	71266.3	426705	2935.38
D8	15	240822	53666.4	59166.3	371216	1308.75
D9	15	251102	62552.2	59810.6	382418	2043.84
D10	15	280325	68999.5	62783.6	419721	2126.72
D11	15	436981	103571	81056.1	540577	3081.72
D12	15	357749	89233.9	63086.7	457945	3079.05
E1	15	363937	100374	64906.3	503175	2286.71
E2	15	393025	98790.9	77322	549590	2812.42
E3	15	382648	107922	77507.1	501249	2725.32
E4	15	358497	92177.5	73058.9	448714	2310.26
E5	15	527318	138965	97517.6	561860	2940.41
E6	15	354746	87391.9	73438.2	429084	2278.64
E7	15	423978	88384.1	85646.5	480444	3640.17
E8	15	393902	81293.8	78184.3	475092	2568.81
E9	15	385540	82403	74135.2	469085	2323.67
E10	15	696997	118713	68668.8	451242	2192.47
E11	15	867523	155519	83911.7	553928	3549.99
E12	15	740227	140137	67826.1	492271	3195.31
F1	15	342926	96938.8	60061.3	441231	1736.62
F2	15	404709	106542	72649.7	509247	2293.81
F3	15	369485	96163.8	71438.6	457770	2034.83
F4	15	350373	89290.5	77683.2	485065	2446.09
F5	15	609288	139471	117634	702218	3749.12
F6	15	370086	89992.5	76495.3	457099	2151.75
F7	15	525134	103216	81996.4	492009	2389.8
F8	15	525664	100975	78873.3	476424	3370.06
F9	15	524264	103781	74185.8	463435	2397.48
F10	15	1.0183e+06	164830	78948.8	530222	2142.4
F11	15	1.13209e+06	195306	93727.3	626639	3186.12
F12	15	1.01292e+06	182932	75253.4	557842	3308.12
G1	15	349189	100153	60965.4	476718	1836.2
G2	15	436590	109568	72497.9	516076	2748.23
G3	15	429909	106791	75424.3	505749	2107.5
G4	15	396933	101955	78977.2	508988	2545.78
G5	15	595180	155137	109774	660038	3685.3
G6	15	384817	101039	79062	483669	2904.44
G7	15	329047	83730.4	82225.8	504806	2857.36
G8	15	310774	78615.1	75816.5	474153	2913.24
G9	15	329316	85873.4	78978.1	510790	2403.33
G10	15	638867	123034	70050.5	478783	1452.39
G11	15	854916	167803	90447.4	607665	4190.77
G12	15	847411	169351	79964.9	603939	3363.48
H1	15	400467	111617	62663.4	511861	2208.58
H2	15	438324	114382	71868.3	528407	2303.34
H3	15	397325	100385	69201.5	483094	2762.45
H4	15	238950	19395.2	10499	8990.09	2790.83
H5	15	445803	39132.1	21845.3	17585	4815.96
H6	15	237501	20048.5	10747.1	8872.68	2461.47
H7	15	359795	86399.6	82706.4	533870	2954.5
H8	15	329224	83132	72459.6	464703	2957.4
H9	15	314156	82339.5	70498.3	481042	2756.92
H10	15	303872	23958.5	12466.3	10236.7	2937.68
H11	15	566391	54186.7	30773.7	26392.7	8218.38
H12	15	480312	42894.1	22534.5	19562.8	5652.6
A1	16	283052	72664.4	38196.2	344656	1148.16
A2	16	314004	76320.4	48488.7	396156	2451.51
A3	16	269157	67847.2	43029.1	343424	1540.94
A4	16	243277	57103.5	41016.5	311746	1151.52
A5	16	393099	89737.6	68135.7	486439	2331.4
A6	16	273198	61045.7	47152.2	335232	1492.28
A7	16	621450	101383	53127.9	379526	2040.66
A8	16	635430	100071	51549.5	378264	1888.78
A9	16	718028	117548	55692.2	414801	2163.11
A10	16	285406	72713	51835	393296	2289.65
A11	16	479614	112976	71638.8	547390	589.654
A12	16	396448	98556.2	55874	440682	3424.22
B1	16	247708	68946.4	37405	315506	1637.21
B2	16	326934	80984.9	49312.5	380565	2062.16
B3	16	268956	62236.1	42120.5	309767	1444.7
B4	16	248434	62126.9	49016.5	358671	9046.2
B5	16	358136	83271	66392.9	449246	3055.34
B6	16	239888	58466.6	46345.6	313251	1996.86
B7	16	681409	102161	53323.4	359138	2045.37
B8	16	714501	108136	52115.2	352965	1874.26
B9	16	705014	108403	49443.8	346859	1262.44
B10	16	248903	63780.9	54434.7	394791	2076.04
B11	16	415574	100091	74745.2	530378	4107.49
B12	16	319577	81948.9	55560.3	429659	3070.95
C1	16	330339	100749	50149.9	381538	1987.71
C2	16	325622	80680.5	53766.6	392518	1921.69
C3	16	276366	67864.9	50152.8	350378	1938.45
C4	16	246082	60156.8	48902	335832	1657.55
C5	16	390073	89635.1	70535.1	452146	2638.66
C6	16	248763	60917.4	52299	340672	1943.95
C7	16	365952	75118.3	61604.4	397604	2398.6
C8	16	337737	70600.9	56449.2	366344	1552.98
C9	16	319700	69082	52192.7	348238	1173.68
C10	16	268177	67508.2	61143.9	432388	2076.94
C11	16	430847	103519	81697.2	568901	4009.39
C12	16	343907	87548.9	61801.3	465737	3078.79
D1	16	357147	95391.7	57803.5	444656	2326.81
D2	16	383819	94365.9	66365.2	471469	2186.95
D3	16	322846	82369	60308.6	399499	2346.08
D4	16	301355	67618.5	59727.5	382564	2380.6
D5	16	448112	102121	90991.2	556259	3818.65
D6	16	296588	70391.6	61166.5	373469	1894.21
D7	16	321007	70934	71313	426540	2823.39
D8	16	250811	54702.3	59137.9	370758	1498.58
D9	16	264045	63864.9	59851.7	382332	2011.8
D10	16	286066	69515.7	62981.9	420485	2418.45
D11	16	444676	104585	81163.3	540628	3173.21
D12	16	364018	90060.7	63107	458422	3289.59
E1	16	364229	99906.8	64914.3	503259	2278.51
E2	16	393749	98520.6	77326.5	549354	3161.98
E3	16	382521	108331	77400.1	501643	2061.14
E4	16	359278	92426.1	72883.3	448809	2164.4
E5	16	528142	138975	97701.8	561626	3038.05
E6	16	355334	87391.9	73275.7	428685	2287.43
E7	16	455232	91318.3	85436.1	481213	3647.97
E8	16	461948	87628.7	78122.8	475710	2891.31
E9	16	451472	88915.2	74126.1	469039	2345.71
E10	16	838373	133513	68580.1	451096	2200.54
E11	16	1.02375e+06	172690	83857	554090	3682.77
E12	16	877124	157492	67836	491405	3149.83
F1	16	342873	97207.8	59907.1	440448	1994.66
F2	16	405465	107150	72439.9	509166	1828.02
F3	16	369420	96658.5	71529.1	457703	1891.95
F4	16	350854	89459.1	77699.4	484116	2316.53
F5	16	609171	139818	117694	699264	3379.35
F6	16	369499	89797.5	76619.5	456689	2241.44
F7	16	651706	115432	81849.2	492065	2576.28
F8	16	650017	112761	78687.4	476618	2773.97
F9	16	645359	116300	74148.4	463237	2231.4
F10	16	1.16255e+06	180644	79057.3	530163	2271.37
F11	16	1.27434e+06	211922	93588.2	628309	2805.09
F12	16	1.14391e+06	200422	75004.7	557986	3603.78
G1	16	349928	100051	61177.6	477476	2143.23
G2	16	436947	110186	72534	516766	2572.79
G3	16	430279	107055	75624.7	505990	2205.99
G4	16	397786	102246	79079.6	508967	2446.08
G5	16	595632	155260	109811	659446	3783.16
G6	16	385330	101487	79152.3	483724	2485.95
G7	16	335798	84720.9	82228.6	504931	2465.98
G8	16	317550	79575.2	75813.6	473950	2655.74
G9	16	335596	86554.1	78998.3	511194	2918.69
G10	16	772761	137444	70065.7	478997	1456.75
G11	16	1.02069e+06	187438	90381.3	607356	4295.93
G12	16	1.02292e+06	194069	79878.8	603371	3358.54
H1	16	399538	111840	62677	512222	2155.92
H2	16	439755	114405	71966.1	529027	2691.42
H3	16	397457	100270	69074.1	483097	2801.66
H4	16	238621	19518.1	10665.7	8993.88	2963.91
H5	16	446466	39146.1	21814.3	17579.1	4907.23
H6	16	237844	19651	10680.6	8888.84	2445.38
H7	16	361111	86912.2	82710.2	533770	3303.39
H8	16	329769	83024.2	72245.6	464422	2931.42
H9	16	315866	82676.5	70360.1	481202	3036.36
H10	16	304085	24002.4	12285	10393.2	3106.86
H11	16	566798	54012.4	30552.5	26494.3	8041.66
H12	16	479025	42629	22651.6	19135.3	5787.23
A1	17	282072	72580.7	38294.9	344219	1577.99
A2	17	313588	76408.7	48356.4	395594	2405.86
A3	17	269920	68093.9	43213.8	342924	1408.52
A4	17	242770	57168.4	40995.3	311873	1460.21
A5	17	393573	89955	68151.2	486643	2506.37
A6	17	273658	61257	47214.3	334567	1682.53
A7	17	738757	112366	53230.8	379450	1872.55
A8	17	767638	112834	51527.2	378326	2005.84
A9	17	860551	132672	55605.1	414940	2235.4
A10	17	305300	74986.6	51702.4	392782	1985.71
A11	17	506772	116751	71595.4	546073	865.204
A12	17	416631	102478	55974.8	440270	3233.53
B1	17	247400	68831.8	37540.9	316280	1282.86
B2	17	326449	81100.6	49436.4	381038	1998.99
B3	17	268870	62059.5	42137.8	309756	1300.52
B4	17	248483	62256.9	49134.7	358476	8884.07
B5	17	358231	83220.7	66347.3	448739	2884.28
B6	17	240187	58523.8	46636.2	313501	2071.12
B7	17	785291	111431	53329.4	358761	2303.81
B8	17	826692	118623	51973.2	352614	2030.98
B9	17	818980	119536	49262.1	346878	1524.45
B10	17	249761	63909.2	54213.2	394613	2054.49
B11	17	416746	100254	74873.9	530297	3913.51
B12	17	320645	81915.9	55489.7	429850	2757.48
C1	17	329527	101010	50168.2	381610	1631.23
C2	17	325661	80854.8	53707.8	392455	2408.58
C3	17	276538	68032.4	50210	350193	2024.6
C4	17	245475	60309.6	48929.2	336426	1907.6
C5	17	391322	89604	70649.5	452621	2537.51
C6	17	249250	61099	52381.7	341189	2008.18
C7	17	441448	82062.1	61500.1	397499	2315.72
C8	17	409762	77490.9	56474.5	366276	1250.3
C9	17	383247	75219.5	52288	348105	1234.85
C10	17	276356	68476.6	61224.8	432214	2282.11
C11	17	439920	104808	81457.7	568596	4017.56
C12	17	351918	88432.2	61859.9	466066	2538.38
D1	17	356830	95447.3	57521.8	444795	2252.86
D2	17	383791	94109.6	66290	471385	1769.29
D3	17	323907	82245.4	60059	399946	2373.55
D4	17	301880	67654.8	59803	382645	2130.89
D5	17	448318	102484	90939.1	556861	3949.8
D6	17	296481	70465.2	60984.9	373818	2122.59
D7	17	344100	73564.1	71272.2	426522	2865.63
D8	17	270074	56664.9	59364	371081	1396.56
D9	17	286589	66312.4	59755.3	382171	1892.91
D10	17	296841	70831.5	63031.4	420317	2197.23
D11	17	458572	106312	81174.9	539826	3267.58
D12	17	376401	91835.7	63033	458313	3161.1
E1	17	364004	100571	64822.5	503448	1878.02
E2	17	393090	98331.8	77426.9	549448	2745.24
E3	17	382676	108671	77638.7	501666	2385.6
E4	17	359495	92562.6	73183.7	448645	1982.63
E5	17	528608	139903	97847.9	561376	3181.46
E6	17	355650	87595.5	73186.1	428910	2083.3
E7	17	499993	96169.2	85383	481015	3948.56
E8	17	553576	96576.9	78157.1	475894	2679.7
E9	17	542738	98021.5	74126.1	469257	2431.09
E10	17	961100	146467	68601.4	451009	2178.11
E11	17	1.15486e+06	188409	83699.4	553075	3431.57
E12	17	991942	172944	67548.5	491605	3111.65
F1	17	342394	97002.4	60285.1	440414	1991.7
F2	17	405663	107011	72787.6	509037	2057.41
F3	17	370175	96719.6	71660	457307	2000.42
F4	17	351127	89786.3	77559.6	484398	2086.22
F5	17	609274	139886	117599	699245	3503.68
F6	17	370137	90265.2	76487.4	456784	2124.49
F7	17	797547	129114	81725.5	491334	2546.63
F8	17	790899	125760	78706.4	476883	3240.52
F9	17	782291	129885	74033.8	462616	2499.94
F10	17	1.28063e+06	193583	78758.5	529855	2028.35
F11	17	1.39019e+06	226102	93489.6	629228	2950.15
F12	17	1.25411e+06	215012	75018	558199	3299.52
G1	17	349972	100690	61001	477045	2239.56
G2	17	437832	110249	72559	516499	2766.64
G3	17	430569	107271	75657.4	506001	2325.95
G4	17	397974	102341	79159.4	508590	2548.74
G5	17	596347	155287	110232	659386	3791.8
G6	17	384887	102017	79131.3	483162	2378.55
G7	17	348312	86156	82250.8	504704	2714.44
G8	17	328368	80504.1	75801.1	473845	2741.25
G9	17	348578	88261.6	79042.7	511276	2986.66
G10	17	899792	151420	69918	479423	1476.39
G11	17	1.16754e+06	205687	89987.2	607086	4113.41
G12	17	1185160	215530	79634.9	603088	3343.73
H1	17	400603	111922	62502.9	510844	2009.81
H2	17	438652	114803	71839.2	528880	2429.27
H3	17	397793	100184	69308.4	482733	2637.69
H4	17	238613	19444.4	10529.9	8989.14	2967.67
H5	17	446694	39261.3	21914.2	17561.2	5050.53
H6	17	237861	19707.5	10762.2	8789.19	2457
H7	17	363244	87184.9	82746.8	533600	2852.05
H8	17	330062	82945.2	72365.1	464510	3034.39
H9	17	317883	83024.4	70579.1	481016	2714.1
H10	17	303813	23957.2	12332.2	10581.8	2547.48
H11	17	565416	54039.6	30572.6	26480.9	8137.33
H12	17	478013	42881.9	22688.8	19544.5	5771.29
A1	18	282539	72792.4	38371.2	343533	1360.88
A2	18	313667	76362.9	48290.9	395632	2454.7
A3	18	269346	68235.9	43205.6	343190	1527.2
A4	18	242875	56985.4	41013.9	312114	1051.8
A5	18	392744	90092.9	68185.5	486773	2319.24
A6	18	273248	61168.4	47277.2	334714	1631.96
A7	18	840879	122068	52920.5	379267	1943.33
A8	18	876227	123704	51535.4	378508	2322.16
A9	18	983213	145614	55560.2	414900	2128.41
A10	18	341838	79641.3	51846	392642	1881.04
A11	18	556295	122762	71516.5	546574	995.608
A12	18	454197	107966	55876.8	439854	3223.86
B1	18	247806	68927.3	37564	315900	1341.47
B2	18	327099	81147.3	49327.4	379877	1776.27
B3	18	269020	62175.5	42169.3	309776	1055.33
B4	18	248690	62467.6	49085.5	358066	8940.13
B5	18	358513	83065.5	66357.4	448650	2746.1
B6	18	240159	58339.9	46514.5	313163	2004.12
B7	18	874492	119764	53358.5	358795	2251.81
B8	18	922363	127960	52058.7	352757	1736.63
B9	18	916276	129252	49329.6	347038	1627.94
B10	18	252302	64045.6	54367.7	394627	2289.75
B11	18	419084	100568	74725.7	531078	3825.24
B12	18	322729	82533	55318.2	429349	2850.4
C1	18	329966	101319	50114.6	380861	1944.69
C2	18	325589	81040.1	53945.1	391961	1821.2
C3	18	276849	68266.1	50247.6	349931	1992.76
C4	18	245802	60749.3	48765.9	335996	1525.69
C5	18	391052	89835.8	70653.1	452218	2752.33
C6	18	249314	61315.6	52408.1	340470	1809.85
C7	18	546784	91513.3	61677.6	397704	2259.92
C8	18	510535	87001.8	56248.7	366454	1047.42
C9	18	474340	84048.9	52185.4	347932	1208.4
C10	18	291812	70272	61228.2	432546	2092.59
C11	18	457423	106874	81527.1	568476	4015.52
C12	18	367071	90587.6	61747.1	466496	2988.72
D1	18	357463	95638.5	57747.4	444333	2340.37
D2	18	383904	94309.3	66374.3	470895	1782.37
D3	18	323797	82422.4	60295.6	399343	2091.73
D4	18	301907	67842	59811.7	382654	2432.91
D5	18	448134	102580	90992.2	556890	3653.19
D6	18	296856	70502	61092.4	373502	1835.67
D7	18	386745	77546.8	71226.5	426522	2981.55
D8	18	303931	59801.1	59145.4	371163	1782.07
D9	18	327076	70440.9	59664.8	382452	2035.41
D10	18	317106	72730.7	62850.9	420131	2284.48
D11	18	484508	109220	81027.1	540186	3369.67
D12	18	398813	95181.6	62975.2	458490	3161.1
E1	18	364556	100729	64807.9	503116	2223.83
E2	18	392813	98424.5	77559.8	549495	2873.9
E3	18	383825	108747	77634.4	500902	2240.79
E4	18	359725	93002.6	73127.4	448132	2128.49
E5	18	529333	139811	97686.7	560962	2634.26
E6	18	355924	87719.9	73084	428891	2409.52
E7	18	560911	101986	85463.6	481140	3768.01
E8	18	662642	107272	78058.3	475880	2599.33
E9	18	652767	108849	74109.7	469269	2303.48
E10	18	1.07479e+06	158405	68447	450501	2145.8
E11	18	1.27879e+06	202611	83413.4	552924	3782.35
E12	18	1.10173e+06	186846	67281.7	491108	3088.91
F1	18	342742	97629.8	59982.7	440198	2266.05
F2	18	405689	107336	72712.2	508774	2188.48
F3	18	369926	96951.2	71753.6	457633	2256.99
F4	18	351299	89577.4	77605.2	483175	2308.31
F5	18	609859	139553	117467	699638	3673.02
F6	18	370788	90087.1	76494.4	456023	2304.76
F7	18	936813	141824	81516.9	491317	2319.99
F8	18	924134	138408	78534.4	476568	3401.43
F9	18	919712	142910	73859.2	463347	2319.83
F10	18	1383747	204361	78802.1	530281	2257.51
F11	18	1497786	238497	93297.5	626403	2808.16
F12	18	1.3475e+06	227657	74777.2	558358	3535.02
G1	18	349901	100634	60993.3	476859	2346.42
G2	18	437180	110131	72772.3	516543	2532.3
G3	18	430355	107234	75468.4	506684	2319.64
G4	18	398360	102664	79048.1	509141	2412.52
G5	18	596704	154998	110097	658807	3576.88
G6	18	385816	101817	79146.9	483215	2417.44
G7	18	371245	88471	82251.7	505148	2937.69
G8	18	349870	82498.2	75797.2	474283	2808.3
G9	18	369575	90460.8	78981.1	511118	2786.8
G10	18	1.01736e+06	164789	69880	479220	1331.26
G11	18	1.30228e+06	222236	90066.8	607881	4061.43
G12	18	1.33113e+06	235852	79608.8	603690	3605.31
H1	18	400543	111668	62753.9	510314	2628.21
H2	18	438680	115077	71822.9	528963	2847.12
H3	18	397215	100036	69327.7	483395	2392.93
H4	18	238805	19556.9	10427.8	9069.79	2886.78
H5	18	446576	39221.3	21871.2	17742	5179.1
H6	18	237551	19629.8	10850.1	8784.71	2211.21
H7	18	366839	87680.2	82559.3	533422	2779.57
H8	18	333307	83066	72333.6	464067	2737.54
H9	18	322091	83457.3	70497.2	481166	2835.08
H10	18	304138	23901.7	12340.9	10341.4	2801.85
H11	18	564927	53611	30339.4	26264.3	7677.58
H12	18	476426	42053.9	22315.1	19621.5	5351.46
A1	19	281867	72707.1	38239.6	343896	1094.24
A2	19	313703	76251.6	48445	395794	1928.08
A3	19	269878	68251.4	43092	342404	1124.07
A4	19	243399	57445.5	41032.5	311713	1274.65
A5	19	393411	89998.8	68112.1	486988	2907.36
A6	19	273569	61122.6	47177.7	335340	1660.05
A7	19	919681	130376	52917.2	379528	1920.81
A8	19	964161	133159	51377.2	378874	2331.29
A9	19	1079895	156149	55587	415470	2148.65
A10	19	404368	87438.7	51696.4	393308	2051.12
A11	19	640138	134663	71524.5	547073	695.111
A12	19	517860	118165	55734.9	440218	3145.09
B1	19	246408	69184.5	37520.5	315460	1033.75
B2	19	326688	81285.2	49222	379885	2090.97
B3	19	268458	62427.7	42218.1	309848	1632.03
B4	19	248558	62400.5	49133	358090	8869.41
B5	19	358037	83219.9	66352.4	448746	2800.87
B6	19	240175	58608.7	46464.1	313502	2202.68
B7	19	946700	126501	53123.7	358650	2555.37
B8	19	1.00019e+06	135341	51861	352777	1974.49
B9	19	998232	137632	49073.9	346989	1512.95
B10	19	255746	64446.6	54424	394421	2581.58
B11	19	424316	101245	74685.9	530288	3812.93
B12	19	326461	83276.4	55330.5	430084	3100.06
C1	19	330286	101046	50392.3	381052	1927.48
C2	19	325381	80810.2	53741.4	391324	2329.85
C3	19	276969	68041.8	50332	349855	1985.27
C4	19	246399	60612.5	48897.1	336126	1585.27
C5	19	390861	89561.6	70513.6	452600	2484.71
C6	19	249339	61020.6	52522.9	341065	1997.74
C7	19	666962	101846	61567.8	397044	2196.74
C8	19	624619	97496.8	56239.7	366373	1535.66
C9	19	579360	94345.1	52164.2	348184	1300.97
C10	19	318124	73359.4	61420.9	432509	1865.68
C11	19	488070	110744	81354	568106	4200.36
C12	19	392879	94590.5	61550.1	466079	2669.09
D1	19	357413	95780.4	57879.9	444278	2599.17
D2	19	383919	94311.3	66405.8	470972	2221.17
D3	19	323673	82925.6	60134.2	399402	2330.82
D4	19	301893	67685.7	59794.3	382926	2404.29
D5	19	448284	102308	91083.6	557281	3616.87
D6	19	296970	70729	61106.6	373869	1858.7
D7	19	454005	83710.5	70880.7	426158	3229.12
D8	19	357765	64513.5	59266.4	371320	1499.42
D9	19	392469	76482	59726.8	382122	2176.21
D10	19	353454	76722.2	62931.4	419804	2409.63
D11	19	529899	114694	81082.2	541105	3155.87
D12	19	440157	100787	62932.7	458385	3306.4
E1	19	364486	100729	65016.7	503088	2527.27
E2	19	392345	98413.4	77515.1	549000	3154.01
E3	19	383449	109007	77691.2	501795	2101.42
E4	19	359559	93010	73279.8	449028	2161.03
E5	19	529671	140215	97672.7	560680	2952.61
E6	19	356238	88134.5	73332.1	428349	2295.25
E7	19	628252	108723	85229.6	481118	3570.88
E8	19	771494	117539	77972.5	476207	2574.91
E9	19	764683	119962	73890.9	469423	2192.39
E10	19	1.16898e+06	168688	68362.7	450855	2229.26
E11	19	1.38297e+06	214382	83388.8	552792	3864.89
E12	19	1.19162e+06	198732	67241.9	491456	2993.88
F1	19	343746	97623.4	60078	440111	2012.46
F2	19	405758	107328	72905.5	508663	2358.17
F3	19	369991	96981.7	71839.8	457599	2215.27
F4	19	351632	90052.5	77641.7	483530	2478.99
F5	19	609958	139707	117503	698790	3689.1
F6	19	370944	90412.1	76538.2	455957	1887.07
F7	19	1.05249e+06	152737	81386.7	491134	2384.06
F8	19	1.03306e+06	148595	78072.4	476333	3023.95
F9	19	1.03742e+06	154958	73694.3	463429	2293.95
F10	19	1.46739e+06	213344	78750	530194	1945.21
F11	19	1.58235e+06	247930	92979.8	627945	2924.61
F12	19	1.42603e+06	237596	74726.6	559122	3458.53
G1	19	349560	100551	61001	476400	2074
G2	19	437077	110504	72677.5	516678	2810.8
G3	19	430149	107217	75535.2	506982	2560.82
G4	19	398628	102810	79273.7	509160	2436.21
G5	19	596270	154862	110001	659763	3571.12
G6	19	385513	101880	79146.9	483156	2681.31
G7	19	413897	92939.9	82283	504596	3070.33
G8	19	387500	86875	75715.2	474157	3037.62
G9	19	409275	95049.2	79038.7	511075	2617.38
G10	19	1.11722e+06	176500	69779	479012	1712.09
G11	19	1.41906e+06	236924	89833	607844	3992.53
G12	19	1.45712e+06	253579	79407.9	603141	3378.28
H1	19	398925	111388	62362.9	510407	1941.85
H2	19	438244	114882	71891.6	528535	2778.43
H3	19	396886	100645	69202.7	483279	2897.9
H4	19	238840	19846.3	10561.8	9154.23	2929.1
H5	19	446157	39048	21790.3	17891.1	4811.05
H6	19	237225	19907.2	10885.5	8891.53	2520.46
H7	19	373937	88493.4	82542	533482	2932.27
H8	19	337223	83191.5	72378.1	463951	2846.08
H9	19	329116	84512.6	70659.9	481421	2706.6
H10	19	304182	24154.7	12184.4	10496.7	2475.85
H11	19	564392	53868.1	30596.8	26530.4	8015.08
H12	19	475928	42680	22423	19230.7	5634.89
A1	20	282830	72623.4	38317.4	344072	1407.51
A2	20	313116	75911.2	48391.4	395721	2269.96
A3	20	270135	68377.9	43203.6	342844	1279.05
A4	20	242924	57243.9	41005.9	311792	1028.39
A5	20	393466	90112.3	68194.5	486784	2228.52
A6	20	273391	61268.7	47171.3	335137	1705.81
A7	20	991523	136643	52984.8	379969	2045.48
A8	20	1042765	141054	51404.6	378586	1911.2
A9	20	1.16851e+06	165693	55438.7	415205	2455.19
A10	20	501955	98758.5	51766.2	392612	1846.82
A11	20	773678	152041	71436.5	546409	656.557
A12	20	618457	133157	55611.4	439392	3288.8
B1	20	247241	68890.6	37494.7	315458	1742.45
B2	20	327718	81211.6	49202.5	379971	1945.81
B3	20	268557	62360.1	42153	309800	1406.45
B4	20	248113	62344.4	49150.2	358207	8828.02
B5	20	358426	83302.4	66288.2	449175	2611.28
B6	20	240749	58695.2	46505.7	313434	2255.95
B7	20	1.00834e+06	131999	53116.9	359016	2123.36
B8	20	1065899	141526	51893.2	352672	1872.67
B9	20	1.06557e+06	144382	49101	346951	1540.88
B10	20	263392	65365.2	54438.3	394491	2271.79
B11	20	432954	102286	74761.5	531094	4053.1
B12	20	333302	84155.5	55522.2	429673	2712.69
C1	20	329407	101483	50269.3	381035	2018.44
C2	20	325668	80918	53796	391545	2394.08
C3	20	276946	68277.2	50388.3	349981	1989.95
C4	20	246530	60625.7	48964.2	336202	1631.18
C5	20	391767	89797.8	70736.3	452967	2933.13
C6	20	249699	61340.5	52385.7	340805	1898.98
C7	20	779167	111641	61448.4	397096	2222.18
C8	20	737382	107485	56150	366499	1411.13
C9	20	686724	104614	52210.6	348241	1252.2
C10	20	363251	78169.4	61279.8	432546	2068.25
C11	20	540955	117170	81288.6	568368	4117.64
C12	20	437700	100462	61568.9	466199	2718.52
D1	20	357479	95579.3	57785.6	444804	2531.39
D2	20	383684	94026.2	66258.5	470833	2219.16
D3	20	323706	83010.6	60379.8	399229	2628.91
D4	20	301943	67930.1	59830.1	382274	2323.36
D5	20	448851	102768	91319.4	557387	3836.81
D6	20	296880	70493.9	61227.4	373648	1722.44
D7	20	551063	92351.6	71227.5	426495	3135.79
D8	20	434243	71356.2	59161.3	370736	1575.52
D9	20	484754	85282.9	59654.7	382680	1881.95
D10	20	413772	83100.8	62946.5	420771	2362.92
D11	20	607868	123284	81041.6	540648	3680.73
D12	20	508967	109349	62991.4	457921	3269.83
E1	20	364673	100900	65011.4	502986	2063.91
E2	20	392326	98184.4	77413.5	549418	2851.13
E3	20	383848	109408	77860.3	501136	2433.51
E4	20	360022	93327.4	73053.4	448453	2120.64
E5	20	530212	140546	97777.8	560603	3159.08
E6	20	356550	87992.6	73354.5	428443	2436.87
E7	20	699195	115622	85476.4	480823	3790.46
E8	20	870746	127328	77926.1	476510	2749.9
E9	20	867290	130316	73992.1	469921	2230.95
E10	20	1249074	176906	68321.9	450853	2407.85
E11	20	1.46775e+06	223716	83224.8	553596	3648.68
E12	20	1.26471e+06	208397	67041.4	491318	3234.3
F1	20	343087	97663.2	60002.4	440016	1819.67
F2	20	406531	107364	72705.1	508399	1952.08
F3	20	370927	96837.5	71777	457651	2234.04
F4	20	351832	89810	77524.1	483592	2304.2
F5	20	610341	139364	117561	699534	3708.39
F6	20	370048	90644.2	76492.7	455874	2392.69
F7	20	1.1539e+06	162054	81282.8	491263	2455.78
F8	20	1.12667e+06	157664	78257.4	476176	3001.68
F9	20	1.13812e+06	164992	73750	463165	2241.1
F10	20	1.5332e+06	220563	78754.2	529840	1955.87
F11	20	1.64858e+06	255407	93218.6	627349	3045.15
F12	20	1.48661e+06	245550	74498.3	557439	3516.11
G1	20	350032	100894	60996.4	476916	2165.81
G2	20	437541	110463	72763.6	517206	2548.25
G3	20	430526	107287	75770.8	506918	2549.45
G4	20	399392	102900	79490.5	509076	2586.25
G5	20	596749	154674	109978	659429	3646.92
G6	20	385719	102076	79314.8	483763	2593.35
G7	20	484149	99881.2	82403	504538	2826.53
G8	20	452159	93245	75654.4	474574	3051.23
G9	20	475875	102097	79134.6	511262	2711.73
G10	20	1.20226e+06	185866	69421.7	479308	1203.59
G11	20	1.51823e+06	249458	89650.7	607675	4143.63
G12	20	1.56123e+06	267991	79280	603572	3497.96
H1	20	400334	111644	62398.8	510264	2111.75
H2	20	438199	114774	71814.8	528562	2676.54
H3	20	397171	100584	69370.9	483316	2736.31
H4	20	239156	19410.4	10604.8	9120.08	2929.1
H5	20	446236	39128.1	21910.2	17612.9	4924.9
H6	20	237337	19779.1	10868.7	8515.4	2349.75
H7	20	386702	89808.6	82619.9	533330	3309.19
H8	20	345921	84247.1	72336.4	464730	2851.64
H9	20	341834	86092.3	70672.6	481233	2785.83
H10	20	304786	23941.7	12234.1	10187.4	2920.4
H11	20	563864	53945.3	30430.6	26251	7710.79
H12	20	475307	42718.7	22436	19425.2	5803.17
A1	21	282440	72741.5	38562.8	343711	1184.58
A2	21	313147	76070.5	48368.5	395267	2409.04
A3	21	270084	67995.4	43296	343200	1249.62
A4	21	243154	57210.1	41095.2	311735	1300.66
A5	21	394000	90096.9	68332.5	486544	2092.42
A6	21	273629	61396.1	47345.8	335344	1724.27
A7	21	1.04536e+06	142266	52829.6	379840	1976.31
A8	21	1.10489e+06	147165	51358.2	378820	2054
A9	21	1.23411e+06	172625	55632.9	415505	2154.43
A10	21	626402	113214	51620.6	393123	2008.85
A11	21	944962	173850	71249	547215	515.947
A12	21	752083	152330	55462.3	439356	3106.4
B1	21	246677	69194.7	37474.3	315131	1016.43
B2	21	326753	81293.4	49436.4	379856	1953.56
B3	21	269061	62310.7	42226.2	310071	1442.74
B4	21	249083	62550	49256.4	358259	9043.61
B5	21	358686	83129.9	66484.1	448700	2813.5
B6	21	240170	58517.6	46629	313722	2341.51
B7	21	1.05899e+06	136234	53119.9	359025	2312.98
B8	21	1.11741e+06	146113	51869.6	352783	1906.08
B9	21	1.12067e+06	149386	48962.9	347319	1595.09
B10	21	277566	67162.9	54279.3	394832	2532.19
B11	21	450661	104611	74593.9	530271	3790.35
B12	21	349055	86110.7	55280.1	429257	2836.97
C1	21	329648	101463	50305.9	380603	2108.18
C2	21	325765	81040.1	53683.7	391409	2250.08
C3	21	277443	68382.4	50335.8	349724	2134.17
C4	21	246469	60832.3	49043.9	335988	1833.37
C5	21	391985	89699.2	70654	452267	2716.53
C6	21	249734	61420.4	52372.8	341130	2064.39
C7	21	874796	120039	61427.7	397380	2206.59
C8	21	834849	116839	56069.3	366670	1671.75
C9	21	781805	114010	51916.7	348402	1094.33
C10	21	431534	85284	61320.3	433065	2063.03
C11	21	621878	126909	81381.2	568231	4396.44
C12	21	506968	109641	61438.4	465836	2700.94
D1	21	357576	95712.6	57782	444179	2045.82
D2	21	384282	94007.7	66520.5	470569	1684.75
D3	21	324119	82585.5	60369.8	399454	2434.59
D4	21	302451	67995.5	60022.7	382735	2271.05
D5	21	448631	102537	91277.1	557496	3805.53
D6	21	296628	70659.9	61233.1	373768	1757.95
D7	21	664187	102191	71030.3	426778	3255.64
D8	21	520477	78842.8	59341.5	371078	1509.45
D9	21	591619	95711.3	59640.5	382478	2171.16
D10	21	503925	92357.3	62930.5	420706	2392.89
D11	21	721215	136549	80857	541370	2859.26
D12	21	611035	122989	62805	458371	2990.09
E1	21	364516	101152	64818.5	502984	2278.51
E2	21	392134	98052.6	77349.9	549025	2790.78
E3	21	383990	109485	77695.4	500915	2319.19
E4	21	360672	93348.6	73233.4	447872	1934.38
E5	21	530928	140858	97993	559957	3159.08
E6	21	356666	88306.8	73371.1	428526	2075.49
E7	21	772112	122546	85217.8	480867	3763.13
E8	21	961549	135715	77945.3	476433	2560.67
E9	21	959144	139715	73863.6	469564	2291.54
E10	21	1.31239e+06	183169	68329	450834	2205.93
E11	21	1.53807e+06	231533	83235.8	551789	3696.23
E12	21	1.32747e+06	215886	66945.2	491061	3312.27
F1	21	343524	97911.6	60239.8	439717	2003.56
F2	21	406257	107654	72808.9	508346	2052.72
F3	21	369764	97268	71760	457517	2108.89
F4	21	352369	90076.1	77474.4	482805	2465.62
F5	21	610660	139232	117564	698084	3703.03
F6	21	371297	90648.4	76513.7	455090	2262.55
F7	21	1.23961e+06	169952	81241.3	491526	2742.67
F8	21	1.20891e+06	165093	78256.4	476464	3191.94
F9	21	1.22408e+06	173436	73501.5	463279	1975.79
F10	21	1.58853e+06	226383	78688.3	529410	2240.46
F11	21	1.70723e+06	261624	92951.7	628841	2785.69
F12	21	1.53763e+06	251360	74402.3	558591	3495.48
G1	21	350370	100797	61135.8	476933	2105.61
[truncated: 10,967 more rows]

## Sheet: Multicomponent Data
Block Type	96alum
Chemistry	SYBR_GREEN
Experiment File Name	D:\HAIFENG\1114Untitled.eds
Experiment Run End Time	2013-01-09 02:40:37 AM CST
Instrument Type	sds7500
Passive Reference	ROX
Well	Cycle	SYBR	ROX
A1	1	292119	358953
A2	1	317217	402716
A3	1	267722	344525
A4	1	243797	316677
A5	1	392028	489680
A6	1	270690	334537
A7	1	248695	381916
A8	1	238003	383548
A9	1	268717	416011
A10	1	263668	399393
A11	1	460607	557075
A12	1	387063	455470
B1	1	252276	323941
B2	1	327264	382813
B3	1	269001	308670
B4	1	245687	356768
B5	1	357424	450146
B6	1	237548	313107
B7	1	242655	357793
B8	1	235327	354334
B9	1	226746	349573
B10	1	249981	401564
B11	1	423696	536362
B12	1	328864	440981
C1	1	326409	389489
C2	1	324899	397273
C3	1	275492	352631
C4	1	240734	335340
C5	1	385341	448328
C6	1	246724	338762
C7	1	247388	397142
C8	1	228295	365873
C9	1	222050	347106
C10	1	253793	432026
C11	1	421870	568328
C12	1	341306	472669
D1	1	358970	451740
D2	1	383791	472513
D3	1	320014	400854
D4	1	296704	380313
D5	1	440298	550915
D6	1	291678	371550
D7	1	282631	426411
D8	1	227060	371167
D9	1	231235	383502
D10	1	270362	417896
D11	1	431599	539894
D12	1	359220	468632
E1	1	364342	509617
E2	1	398435	551618
E3	1	378606	500041
E4	1	351386	447547
E5	1	514951	560878
E6	1	351599	430990
E7	1	380168	479406
E8	1	292597	474200
E9	1	283910	465611
E10	1	303348	450076
E11	1	441598	554484
E12	1	382987	509103
F1	1	348913	452635
F2	1	402145	511865
F3	1	366732	458338
F4	1	343399	487569
F5	1	600145	703199
F6	1	367395	460573
F7	1	306464	496078
F8	1	307322	477061
F9	1	312686	464018
F10	1	337625	526820
F11	1	474683	626034
F12	1	418941	570898
G1	1	357612	490780
G2	1	435972	514739
G3	1	429788	503510
G4	1	391149	506120
G5	1	591916	656949
G6	1	381383	482014
G7	1	312494	504772
G8	1	295938	472831
G9	1	314670	510289
G10	1	315129	480061
G11	1	474314	603556
G12	1	448987	617809
H1	1	412655	527849
H2	1	448464	540247
H3	1	403311	488317
H4	1
H5	1
H6	1
H7	1	354695	544812
H8	1	325304	469841
H9	1	308724	486308
H10	1
H11	1
H12	1
A1	2	290650	358393
A2	2	318241	401301
A3	2	268461	344470
A4	2	244077	315023
A5	2	391034	489725
A6	2	271983	333902
A7	2	248968	381721
A8	2	237205	381300
A9	2	268958	414433
A10	2	263287	397457
A11	2	457237	554152
A12	2	385180	455620
B1	2	251836	322437
B2	2	326803	382310
B3	2	268553	308895
B4	2	246151	357427
B5	2	358894	450135
B6	2	237457	312841
B7	2	244898	358484
B8	2	236126	352995
B9	2	227632	348367
B10	2	249361	399574
B11	2	421653	535586
B12	2	327406	439197
C1	2	328193	388115
C2	2	324527	396237
C3	2	274791	351899
C4	2	242009	335458
C5	2	384742	449859
C6	2	246790	339682
C7	2	249800	397835
C8	2	229255	366017
C9	2	223296	347112
C10	2	254551	431714
C11	2	422330	568426
C12	2	340713	471946
D1	2	360215	450986
D2	2	384053	472359
D3	2	320777	400017
D4	2	298100	380777
D5	2	441613	552881
D6	2	292224	371661
D7	2	285016	426295
D8	2	228105	371240
D9	2	232091	383147
D10	2	271110	418805
D11	2	431490	539893
D12	2	357561	466132
E1	2	364418	509505
E2	2	400097	551329
E3	2	378629	500465
E4	2	352567	448483
E5	2	516276	561998
E6	2	350699	431316
E7	2	382102	480203
E8	2	295094	474064
E9	2	285221	466191
E10	2	304558	450359
E11	2	441964	554849
E12	2	380258	506301
F1	2	347645	449804
F2	2	402486	511944
F3	2	366448	458340
F4	2	345389	487561
F5	2	601834	704068
F6	2	367336	460971
F7	2	307130	495236
F8	2	309198	477312
F9	2	314354	463597
F10	2	339311	527736
F11	2	475425	626137
F12	2	417160	569585
G1	2	357422	488796
G2	2	436638	514945
G3	2	429337	503655
G4	2	393026	507829
G5	2	592351	659109
G6	2	381505	482764
G7	2	314640	504401
G8	2	297907	473253
G9	2	316215	510254
G10	2	316303	478979
G11	2	474943	604898
G12	2	448061	618492
H1	2	411877	528428
H2	2	447206	538819
H3	2	403048	487499
H4	2
H5	2
H6	2
H7	2	355373	543602
H8	2	327014	468814
H9	2	309991	485513
H10	2
H11	2
H12	2
A1	3	288431	355890
A2	3	317744	399769
A3	3	267751	343667
A4	3	243472	314105
A5	3	390985	488320
A6	3	272058	334037
A7	3	249933	379356
A8	3	237520	379307
A9	3	269854	414230
A10	3	262561	396295
A11	3	456573	551889
A12	3	383218	451329
B1	3	250328	320592
B2	3	327111	382514
B3	3	268399	308799
B4	3	247142	357825
B5	3	358815	451285
B6	3	237790	312584
B7	3	246030	358867
B8	3	237202	352561
B9	3	227990	347313
B10	3	248131	396828
B11	3	418564	532699
B12	3	323449	433816
C1	3	331938	385711
C2	3	324552	395636
C3	3	275472	351465
C4	3	242444	335856
C5	3	385753	450575
C6	3	247017	339841
C7	3	251432	398007
C8	3	230322	365739
C9	3	224603	347176
C10	3	255084	431485
C11	3	422151	568936
C12	3	339870	470691
D1	3	360202	449636
D2	3	384087	471955
D3	3	321133	400216
D4	3	298677	381049
D5	3	442849	553833
D6	3	293005	372153
D7	3	286287	426862
D8	3	228623	371506
D9	3	232512	382967
D10	3	271637	419274
D11	3	431770	539706
D12	3	357016	463195
E1	3	364765	507275
E2	3	398645	549006
E3	3	378484	500720
E4	3	353889	449133
E5	3	517228	563269
E6	3	351328	431414
E7	3	382255	481460
E8	3	296523	474900
E9	3	287276	467101
E10	3	305769	450657
E11	3	441848	554513
E12	3	377246	501972
F1	3	345509	446284
F2	3	401049	510312
F3	3	367423	458445
F4	3	346732	488579
F5	3	603950	704995
F6	3	367330	460670
F7	3	308377	495646
F8	3	311635	477845
F9	3	315486	464008
F10	3	341086	528630
F11	3	477302	628277
F12	3	416868	567189
G1	3	353713	483255
G2	3	435205	514823
G3	3	430028	503913
G4	3	393308	508347
G5	3	593236	659704
G6	3	381834	483494
G7	3	315592	504540
G8	3	299527	473887
G9	3	317652	510608
G10	3	317031	478668
G11	3	476999	605634
G12	3	445326	613680
H1	3	409358	525240
H2	3	445362	535275
H3	3	401714	485538
H4	3
H5	3
H6	3
H7	3	355870	541481
H8	3	330250	468031
H9	3	310225	484516
H10	3
H11	3
H12	3
A1	4	287309	354033
A2	4	317075	399299
A3	4	268521	343877
A4	4	243719	314005
A5	4	391493	488456
A6	4	272432	333931
A7	4	251015	379400
A8	4	237925	378684
A9	4	271045	414454
A10	4	262476	394966
A11	4	454861	551343
A12	4	382240	450383
B1	4	249581	318721
B2	4	327774	382631
B3	4	268644	309604
B4	4	247451	358489
B5	4	359302	451095
B6	4	238780	313176
B7	4	247303	359053
B8	4	238430	352777
B9	4	229192	347126
B10	4	248277	396770
B11	4	418085	532712
B12	4	323348	433409
C1	4	331980	385525
C2	4	324794	395188
C3	4	275757	351813
C4	4	243262	335962
C5	4	386394	451835
C6	4	247528	340662
C7	4	252676	398225
C8	4	231782	366560
C9	4	225466	347686
C10	4	255967	431897
C11	4	422874	569262
C12	4	339416	469109
D1	4	359995	448562
D2	4	384867	472133
D3	4	321633	400527
D4	4	299698	381451
D5	4	443591	555164
D6	4	294188	372372
D7	4	287310	427458
D8	4	229790	371940
D9	4	234026	383468
D10	4	272418	419677
D11	4	432362	540749
D12	4	355149	461794
E1	4	364323	506639
E2	4	398962	549986
E3	4	380036	502372
E4	4	353822	450415
E5	4	518578	564397
E6	4	351940	431589
E7	4	383922	481408
E8	4	298306	475940
E9	4	289044	468799
E10	4	307416	450738
E11	4	443115	554512
E12	4	375890	499775
F1	4	345152	445325
F2	4	402084	511186
F3	4	367982	459172
F4	4	347729	488996
F5	4	605670	705125
F6	4	368217	461427
F7	4	309770	496013
F8	4	312958	478975
F9	4	317393	464967
F10	4	344221	529269
F11	4	479364	626720
F12	4	415044	563299
G1	4	352635	481553
G2	4	436328	515905
G3	4	430586	505526
G4	4	393774	509725
G5	4	592938	660665
G6	4	383058	484510
G7	4	317074	505100
G8	4	301255	474469
G9	4	319206	511153
G10	4	318921	479517
G11	4	477651	605929
G12	4	444146	611760
H1	4	408629	523084
H2	4	444112	534554
H3	4	400777	484835
H4	4
H5	4
H6	4
H7	4	356810	539557
H8	4	331592	468061
H9	4	311546	483636
H10	4
H11	4
H12	4
A1	5	287542	353076
A2	5	316913	398838
A3	5	268714	343990
A4	5	244699	313537
A5	5	392409	488357
A6	5	273496	333689
A7	5	251992	379297
A8	5	238760	378767
A9	5	272552	414845
A10	5	262995	394692
A11	5	454818	550149
A12	5	381139	449153
B1	5	249862	318781
B2	5	328248	382414
B3	5	268921	309708
B4	5	248420	358686
B5	5	359393	451106
B6	5	239307	312920
B7	5	248661	358721
B8	5	239957	352441
B9	5	230305	347588
B10	5	248874	397012
B11	5	418895	532649
B12	5	322901	432896
C1	5	333180	385306
C2	5	325881	395885
C3	5	276694	351837
C4	5	244372	336583
C5	5	387374	453052
C6	5	248280	341019
C7	5	253528	397844
C8	5	232935	367263
C9	5	226525	348177
C10	5	257008	432464
C11	5	422742	569573
C12	5	339282	468509
D1	5	360835	447857
D2	5	386436	473334
D3	5	322393	401005
D4	5	300190	382044
D5	5	445405	555588
D6	5	295002	372947
D7	5	288833	427743
D8	5	230418	372467
D9	5	235255	383603
D10	5	273479	420240
D11	5	433642	541152
D12	5	355221	461613
E1	5	365017	506053
E2	5	399825	549900
E3	5	381351	501540
E4	5	355793	450447
E5	5	521221	565083
E6	5	353026	431738
E7	5	384195	481901
E8	5	299155	476235
E9	5	290976	469120
E10	5	309125	451310
E11	5	444196	555179
E12	5	374800	497520
F1	5	344937	444014
F2	5	404115	511188
F3	5	369506	459237
F4	5	348913	488728
F5	5	607232	706630
F6	5	369291	460875
F7	5	311221	496008
F8	5	314511	478970
F9	5	318691	465119
F10	5	346749	530089
F11	5	481370	629125
F12	5	416099	563956
G1	5	352999	481030
G2	5	437317	516574
G3	5	430904	505699
G4	5	395009	510284
G5	5	594963	661824
G6	5	384204	484681
G7	5	318604	505209
G8	5	302380	475547
G9	5	320515	511156
G10	5	320916	479909
G11	5	478841	606942
G12	5	443543	609520
H1	5	408702	521444
H2	5	444482	532993
H3	5	401757	484859
H4	5
H5	5
H6	5
H7	5	358199	538702
H8	5	332693	467417
H9	5	312986	482467
H10	5
H11	5
H12	5
A1	6	288431	351758
A2	6	317575	398340
A3	6	269954	343368
A4	6	245255	313736
A5	6	393457	487930
A6	6	274017	334118
A7	6	253839	379540
A8	6	240622	378654
A9	6	273614	414434
A10	6	263767	394465
A11	6	455332	550741
A12	6	381422	448185
B1	6	249965	318106
B2	6	329073	382664
B3	6	269591	309812
B4	6	249077	358521
B5	6	360222	450996
B6	6	239963	313574
B7	6	250192	359019
B8	6	241838	352602
B9	6	232013	347325
B10	6	249095	396794
B11	6	419308	532487
B12	6	323147	432404
C1	6	334245	384613
C2	6	327109	394734
C3	6	276767	351904
C4	6	245131	337134
C5	6	388438	452820
C6	6	248798	340791
C7	6	255132	398207
C8	6	233709	367381
C9	6	227769	348629
C10	6	258575	432866
C11	6	424338	569884
C12	6	339458	468493
D1	6	361063	448121
D2	6	387406	473328
D3	6	323263	401024
D4	6	301534	382494
D5	6	446492	556547
D6	6	295715	373183
D7	6	290331	427839
D8	6	230566	372556
D9	6	235909	383804
D10	6	274078	420390
D11	6	434705	541315
D12	6	355693	461346
E1	6	365892	505647
E2	6	399747	550079
E3	6	382316	502487
E4	6	357166	450932
E5	6	523405	565347
E6	6	353894	432236
E7	6	385457	482851
E8	6	300718	476441
E9	6	291746	469350
E10	6	310990	451294
E11	6	445889	555171
E12	6	375238	496941
F1	6	345659	443509
F2	6	404640	511326
F3	6	370230	459737
F4	6	349828	488570
F5	6	609536	707208
F6	6	370064	460796
F7	6	312732	496274
F8	6	315599	479260
F9	6	320581	465041
F10	6	351058	530197
F11	6	484708	629280
F12	6	418490	561123
G1	6	352561	479378
G2	6	438742	517015
G3	6	432795	505852
G4	6	396069	510007
G5	6	596874	662346
G6	6	385489	484979
G7	6	319857	505453
G8	6	303268	475256
G9	6	321734	511524
G10	6	322839	480311
G11	6	482033	608318
G12	6	444287	608776
H1	6	408484	520056
H2	6	444033	531960
H3	6	401978	484618
H4	6
H5	6
H6	6
H7	6	358977	537833
H8	6	332665	466709
H9	6	313106	483271
H10	6
H11	6
H12	6
A1	7	287102	350872
A2	7	317732	398105
A3	7	270841	344003
A4	7	245267	313326
A5	7	394367	488482
A6	7	274654	334445
A7	7	255458	379118
A8	7	242328	378341
A9	7	275953	415183
A10	7	264808	394429
A11	7	455100	550321
A12	7	381122	446985
B1	7	250306	317487
B2	7	329642	382353
B3	7	270592	310220
B4	7	249263	358625
B5	7	361193	450600
B6	7	240415	313509
B7	7	251950	359526
B8	7	243845	352873
B9	7	234308	347469
B10	7	249350	396402
B11	7	419354	533050
B12	7	323257	432380
C1	7	334494	383411
C2	7	327572	395198
C3	7	277429	352398
C4	7	245562	336580
C5	7	389883	453343
C6	7	249596	341108
C7	7	256174	398181
C8	7	234816	367560
C9	7	228597	348892
C10	7	258800	433195
C11	7	424638	570508
C12	7	339253	468327
D1	7	361979	447470
D2	7	388402	473181
D3	7	324383	401289
D4	7	302005	382560
D5	7	447804	557111
D6	7	296382	373742
D7	7	291264	428008
D8	7	230929	372707
D9	7	236646	384345
D10	7	275251	421099
D11	7	435304	541816
D12	7	356032	460373
E1	7	366631	505951
E2	7	400350	550789
E3	7	383785	503017
E4	7	357408	451680
E5	7	525347	565284
E6	7	354897	432177
E7	7	385609	482799
E8	7	301055	476784
E9	7	292931	469890
E10	7	313930	451833
E11	7	448488	555815
E12	7	377027	496306
F1	7	346617	443652
F2	7	405569	511481
F3	7	370963	460015
F4	7	350585	488956
F5	7	610767	706329
F6	7	371463	461016
F7	7	313525	495497
F8	7	317006	479629
F9	7	322492	465554
F10	7	357037	530918
F11	7	490329	629439
F12	7	422280	561496
G1	7	353193	479774
G2	7	439437	517552
G3	7	432980	506913
G4	7	397259	510440
G5	7	598768	662062
G6	7	385839	485715
G7	7	320778	506712
G8	7	304397	475532
G9	7	323195	511945
G10	7	325361	480571
G11	7	482898	608395
G12	7	446288	607614
H1	7	408438	519018
H2	7	444432	531309
H3	7	401806	484693
H4	7
H5	7
H6	7
H7	7	360181	537434
H8	7	333266	467173
H9	7	314142	482466
H10	7
H11	7
H12	7
A1	8	287119	349842
A2	8	318025	397930
A3	8	271665	344047
A4	8	244961	313243
A5	8	394609	488050
A6	8	274814	334684
A7	8	257908	379050
A8	8	244456	378784
A9	8	278427	415190
A10	8	265133	394360
A11	8	455285	550046
A12	8	380132	446299
B1	8	250970	317558
B2	8	330163	382585
B3	8	270282	310081
B4	8	249628	359064
B5	8	360938	451134
B6	8	240920	313436
B7	8	255127	359194
B8	8	247243	353099
B9	8	237299	347537
B10	8	250179	396266
B11	8	419516	532877
B12	8	322825	432009
C1	8	335411	383985
C2	8	327675	394968
C3	8	277633	351875
C4	8	245866	336596
C5	8	390573	453540
C6	8	249971	341493
C7	8	257613	398536
C8	8	235924	367401
C9	8	229840	349175
C10	8	259730	433409
C11	8	424784	570435
C12	8	340088	468643
D1	8	361584	447331
D2	8	388436	473338
D3	8	324797	401496
D4	8	302403	382979
D5	8	449086	557521
D6	8	297135	374006
D7	8	292219	428308
D8	8	231207	372724
D9	8	237900	384214
D10	8	275721	421003
D11	8	435257	542134
D12	8	355602	460729
E1	8	367320	505592
E2	8	399674	550995
E3	8	384435	503275
E4	8	358382	450743
E5	8	526658	565742
E6	8	355437	432080
E7	8	385532	482759
E8	8	302594	476929
E9	8	294180	469668
E10	8	317726	451961
E11	8	453066	555668
E12	8	379300	495529
F1	8	346573	443616
F2	8	406807	511041
F3	8	371653	459827
F4	8	350954	488767
F5	8	611656	707280
F6	8	371298	460653
F7	8	315626	495854
F8	8	318882	479188
F9	8	323930	465158
F10	8	367732	531062
F11	8	499550	629582
F12	8	430391	560569
G1	8	353686	479358
G2	8	440043	517443
G3	8	432739	506490
G4	8	397855	510254
G5	8	599535	663049
G6	8	386292	485287
G7	8	321682	505734
G8	8	304687	475875
G9	8	323908	512106
G10	8	328841	480633
G11	8	486750	608454
G12	8	448402	607798
H1	8	408062	517982
H2	8	444203	531311
H3	8	402338	484839
H4	8
H5	8
H6	8
H7	8	360031	537447
H8	8	333308	466999
H9	8	314527	482846
H10	8
H11	8
H12	8
A1	9	287055	348811
A2	9	317671	397947
A3	9	271688	343565
A4	9	245439	313236
A5	9	395288	488316
A6	9	275329	334412
A7	9	262026	379478
A8	9	248143	378632
A9	9	283163	414992
A10	9	266003	394200
A11	9	455735	550456
A12	9	380369	446083
B1	9	251118	317398
B2	9	330166	382802
B3	9	271032	310479
B4	9	250527	358852
B5	9	361301	450748
B6	9	241639	313721
B7	9	260116	359405
B8	9	253128	353155
B9	9	242808	347710
B10	9	250226	395981
B11	9	419682	532529
B12	9	322964	431617
C1	9	335016	383935
C2	9	328716	394457
C3	9	278558	351488
C4	9	246456	336366
C5	9	391262	453266
C6	9	250215	341453
C7	9	259011	398323
C8	9	237555	367173
C9	9	231212	349014
C10	9	260615	433306
C11	9	425984	570086
C12	9	340212	468326
D1	9	363189	447009
D2	9	389065	472778
D3	9	325422	401369
D4	9	302769	383029
D5	9	449413	557956
D6	9	297410	373989
D7	9	293436	428578
D8	9	231587	372645
D9	9	238422	383967
D10	9	276566	420995
D11	9	436006	542373
D12	9	355857	460492
E1	9	367556	505416
E2	9	399688	551125
E3	9	385554	503006
E4	9	359267	450628
E5	9	528087	565444
E6	9	356570	432167
E7	9	386518	483460
E8	9	304869	477094
E9	9	295926	470078
E10	9	324467	452199
E11	9	460211	554992
E12	9	385191	494672
F1	9	347114	443145
F2	9	407844	511296
F3	9	372980	459974
F4	9	352420	488072
F5	9	613796	706508
F6	9	372162	460472
F7	9	319027	496085
F8	9	321907	479204
F9	9	327933	465232
F10	9	387284	531727
F11	9	518068	630242
F12	9	447329	560908
G1	9	353802	478453
G2	9	440744	517755
G3	9	433713	506908
G4	9	398929	510442
G5	9	600631	662616
G6	9	387170	485877
G7	9	323237	506845
G8	9	305785	475602
G9	9	324801	512473
G10	9	334711	480457
G11	9	492165	608732
G12	9	454133	606904
H1	9	409296	517683
H2	9	444495	530732
H3	9	402506	484404
H4	9
H5	9
H6	9
H7	9	361551	536953
H8	9	333752	466629
H9	9	315867	483090
H10	9
H11	9
H12	9
A1	10	286701	347898
A2	10	317682	397364
A3	10	272320	344348
A4	10	245387	312849
A5	10	395721	488171
A6	10	275823	334951
A7	10	268136	379326
A8	10	255052	378806
A9	10	290784	415231
A10	10	266272	394246
A11	10	456486	549286
A12	10	380871	445560
B1	10	251308	317658
B2	10	330744	381976
B3	10	271271	310191
B4	10	250439	359104
B5	10	361431	450794
B6	10	242107	313735
B7	10	269615	359205
B8	10	262935	353134
B9	10	252794	347592
B10	10	250451	396045
B11	10	420148	532892
B12	10	323335	432189
C1	10	336151	384282
C2	10	328976	394290
C3	10	278930	351570
C4	10	247009	336714
C5	10	391894	453575
C6	10	250767	341581
C7	10	260763	398769
C8	10	239114	367345
C9	10	232431	348843
C10	10	261335	433341
C11	10	426295	570089
C12	10	340319	467800
D1	10	363423	446585
D2	10	389249	473554
D3	10	326148	400806
D4	10	303420	382689
D5	10	450434	557513
D6	10	298245	374466
D7	10	294482	428046
D8	10	231903	372528
D9	10	239159	383964
D10	10	276397	421477
D11	10	436066	542550
D12	10	357038	460328
E1	10	368508	505054
E2	10	399770	551048
E3	10	386304	503071
E4	10	360764	450862
E5	10	530495	565124
E6	10	357131	431948
E7	10	388058	483124
E8	10	306917	477393
E9	10	298902	470288
E10	10	337003	452431
E11	10	473257	555811
E12	10	396060	494930
F1	10	347485	442779
F2	10	408029	511194
F3	10	373060	460410
F4	10	353092	487903
F5	10	613315	705481
F6	10	372786	460327
F7	10	324164	495357
F8	10	327833	479022
F9	10	333112	465764
F10	10	421576	531396
F11	10	551156	629946
F12	10	476460	560955
G1	10	354943	478948
G2	10	440817	518281
G3	10	435047	506743
G4	10	399965	510623
G5	10	601518	663388
G6	10	388191	485459
G7	10	324101	506981
G8	10	306530	476346
G9	10	326335	512445
G10	10	343568	480485
G11	10	502750	609250
G12	10	464931	606764
H1	10	408886	516620
H2	10	444766	530264
H3	10	402949	484624
H4	10
H5	10
H6	10
H7	10	361531	536422
H8	10	333743	466464
H9	10	315836	482644
H10	10
H11	10
H12	10
A1	11	286641	347550
A2	11	317757	398162
A3	11	272270	344103
A4	11	245655	312844
A5	11	396362	488482
A6	11	276293	334850
A7	11	280118	379284
A8	11	267601	378978
A9	11	304952	415294
A10	11	266770	393848
A11	11	456841	549555
A12	11	380769	444532
B1	11	251391	317847
B2	11	330791	381855
B3	11	271051	310359
B4	11	250864	359048
B5	11	362229	450489
B6	11	242301	313811
B7	11	286362	359064
B8	11	281926	352993
B9	11	271142	347363
B10	11	251336	395982
B11	11	419940	532794
B12	11	323158	431627
C1	11	336634	383532
C2	11	329231	394261
C3	11	279352	351506
C4	11	247151	336961
C5	11	392748	452863
C6	11	251335	341421
C7	11	263858	398128
C8	11	242005	367720
C9	11	235304	348858
C10	11	262300	433355
C11	11	426932	570103
C12	11	340701	468466
D1	11	362820	447322
D2	11	389838	473094
D3	11	326930	401366
D4	11	304086	382828
D5	11	450932	557980
D6	11	298621	374410
D7	11	295666	428323
D8	11	232194	372423
D9	11	240494	383908
D10	11	276650	421225
D11	11	436468	542410
D12	11	356533	460006
E1	11	369131	504886
E2	11	399657	551333
E3	11	386841	503101
E4	11	361286	451139
E5	11	531339	565310
E6	11	358101	431790
E7	11	389640	483230
E8	11	311577	477130
E9	11	303246	470660
E10	11	360376	452106
E11	11	498037	556903
E12	11	417384	494441
F1	11	348407	443099
F2	11	409571	510726
F3	11	373340	460245
F4	11	353482	488016
F5	11	614584	705227
F6	11	373937	460509
F7	11	334895	494897
F8	11	337013	478580
F9	11	342805	465211
F10	11	481866	531100
F11	11	608455	630763
F12	11	530460	560534
G1	11	355162	478369
G2	11	442178	518314
G3	11	434693	507702
G4	11	400933	511069
G5	11	602698	662612
G6	11	389007	486068
G7	11	324933	506282
G8	11	307003	475606
G9	11	326574	512570
G10	11	361276	480431
G11	11	522915	608971
G12	11	485921	605993
H1	11	408090	516036
H2	11	445301	530421
H3	11	403061	484730
H4	11
H5	11
H6	11
H7	11	362319	536911
H8	11	333784	466503
H9	11	317341	482639
H10	11
H11	11
H12	11
A1	12	287195	347112
A2	12	318390	397559
A3	12	272776	343878
A4	12	245508	312947
A5	12	396676	488423
A6	12	275938	335338
A7	12	301815	379554
A8	12	290756	378597
A9	12	331609	415249
A10	12	268359	394354
A11	12	458300	549080
A12	12	381768	444530
B1	12	251577	317493
B2	12	330585	382281
B3	12	271887	310848
B4	12	250989	358932
B5	12	361905	450991
B6	12	242553	314276
B7	12	316932	358990
B8	12	314881	352934
B9	12	304468	347482
B10	12	251324	395748
B11	12	420591	532685
B12	12	323875	431532
C1	12	336824	383211
C2	12	329818	394353
C3	12	279517	351442
C4	12	247670	336987
C5	12	393230	453242
C6	12	251757	341746
C7	12	268927	398463
C8	12	246666	367719
C9	12	239324	349082
C10	12	263041	433281
C11	12	426907	570236
C12	12	340966	467656
D1	12	363733	446595
D2	12	390039	472765
D3	12	327073	401127
D4	12	304910	383360
D5	12	451137	558744
D6	12	299072	374170
D7	12	296996	428255
D8	12	233584	372628
D9	12	242061	383794
D10	12	278016	421143
D11	12	437072	542761
D12	12	357122	460396
E1	12	369607	504968
E2	12	399872	551148
E3	12	387873	503405
E4	12	361985	451086
E5	12	532424	565319
E6	12	358686	431561
E7	12	393075	483516
E8	12	318709	477746
E9	12	310625	470509
E10	12	399824	451944
E11	12	541810	555097
E12	12	455540	493741
F1	12	348286	443214
F2	12	410686	510942
F3	12	374260	459839
F4	12	354194	487640
F5	12	616014	706106
F6	12	374150	459805
F7	12	351979	494644
F8	12	354378	478844
F9	12	359567	464994
F10	12	578808	531274
F11	12	701014	629965
F12	12	615200	561017
G1	12	356090	478951
G2	12	442334	518045
G3	12	436044	507712
G4	12	401406	510752
G5	12	603674	662244
G6	12	389360	485737
G7	12	326135	506360
G8	12	308474	475854
G9	12	327526	512170
G10	12	392475	480496
G11	12	559922	609230
G12	12	524984	605580
H1	12	408055	514785
H2	12	444567	530380
H3	12	403462	483928
H4	12
H5	12
H6	12
H7	12	362983	536118
H8	12	334269	466220
H9	12	317668	482770
H10	12
H11	12
H12	12
A1	13	286840	346885
A2	13	317596	397608
A3	13	273288	343979
A4	13	245907	312872
A5	13	396575	488241
A6	13	276041	334997
A7	13	341183	379771
A8	13	332634	378271
A9	13	378971	415161
A10	13	270160	393992
A11	13	460104	548764
A12	13	383426	444139
B1	13	251374	317103
B2	13	330672	381994
B3	13	271403	310933
B4	13	251391	359267
B5	13	362638	450227
B6	13	243015	313694
B7	13	369839	359279
B8	13	372346	353304
B9	13	362240	347103
B10	13	251135	395635
B11	13	420007	532795
B12	13	323845	431353
C1	13	337194	382800
C2	13	329388	394463
C3	13	280266	351147
C4	13	248058	336645
C5	13	394561	453534
C6	13	251510	341938
C7	13	277282	398481
C8	13	254828	366965
C9	13	246552	348553
C10	13	263870	433304
C11	13	427384	569808
C12	13	341436	467549
D1	13	363465	446476
D2	13	390193	472760
D3	13	327086	401030
D4	13	304356	383382
D5	13	452434	558164
D6	13	299330	374454
D7	13	299556	428359
D8	13	235252	372671
D9	13	244200	383851
D10	13	279498	420883
D11	13	438916	542414
D12	13	357707	460134
E1	13	369845	505209
E2	13	399200	550665
E3	13	388990	503083
E4	13	362231	450173
E5	13	533124	564383
E6	13	359184	430921
E7	13	399355	483501
E8	13	333120	477466
E9	13	324878	470527
E10	13	469041	452268
E11	13	617893	556071
E12	13	521473	494246
F1	13	348787	442674
F2	13	410477	511327
F3	13	374261	459788
F4	13	354948	486847
F5	13	616109	705176
F6	13	374340	459805
F7	13	384456	494318
F8	13	387375	478538
F9	13	391663	465666
F10	13	718125	531678
F11	13	836200	628180
F12	13	742589	560383
G1	13	355838	478637
G2	13	442824	518375
G3	13	435913	507849
G4	13	402346	510257
G5	13	603433	663758
G6	13	390228	485806
G7	13	327436	506627
G8	13	309569	476195
G9	13	328810	512819
G10	13	447117	480469
G11	13	624098	609598
G12	13	595233	605780
H1	13	408120	514686
H2	13	445305	530266
H3	13	403828	484311
H4	13
H5	13
H6	13
H7	13	363879	536452
H8	13	334416	466500
H9	13	318336	482808
H10	13
H11	13
H12	13
A1	14	286345	345404
A2	14	318447	396862
A3	14	273190	343446
A4	14	246129	312623
A5	14	397662	487958
A6	14	276588	335241
A7	14	406247	379703
A8	14	402367	378766
A9	14	457664	415305
A10	14	273552	393593
A11	14	464222	549099
A12	14	386092	443077
B1	14	252326	316503
B2	14	331818	381546
B3	14	272213	310078
B4	14	251817	358797
B5	14	362738	450287
B6	14	243130	313889
B7	14	452079	359345
B8	14	462223	353333
B9	14	452515	347551
B10	14	251870	395564
B11	14	420584	532949
B12	14	324283	431312
C1	14	337416	382858
C2	14	330461	394190
C3	14	280470	351217
C4	14	248339	337039
C5	14	394957	453830
C6	14	251846	341817
C7	14	292866	398444
C8	14	269416	367240
C9	14	259921	349074
C10	14	265550	433581
C11	14	429235	570332
C12	14	342276	467656
D1	14	363739	446055
D2	14	389514	472951
D3	14	327950	401086
D4	14	304875	383360
D5	14	452504	558915
D6	14	299426	374408
D7	14	303661	428226
D8	14	238573	372105
D9	14	248045	383324
D10	14	281234	421040
D11	14	439349	542812
D12	14	359909	459852
E1	14	370429	505144
E2	14	399492	551363
E3	14	388450	503051
E4	14	363114	450798
E5	14	534622	564714
E6	14	358990	431436
E7	14	410059	482761
E8	14	357580	477302
E9	14	348980	470733
E10	14	570359	451938
E11	14	729314	555451
E12	14	618936	493099
F1	14	348905	442274
F2	14	411258	510800
F3	14	375381	459688
F4	14	355243	487329
F5	14	617314	704020
F6	14	374962	459546
F7	14	440934	494856
F8	14	442246	478594
F9	14	444411	465142
F10	14	875462	531412
F11	14	989898	631176
F12	14	884135	559664
G1	14	356608	478593
G2	14	443723	518827
G3	14	436379	507352
G4	14	403101	510795
G5	14	604581	662048
G6	14	390673	485529
G7	14	329630	506239
G8	14	311983	476001
G9	14	330749	512974
G10	14	531410	480134
G11	14	725529	609442
G12	14	704180	605197
H1	14	408452	513610
H2	14	445302	530809
H3	14	403492	484729
H4	14
H5	14
H6	14
H7	14	364198	535529
H8	14	334660	466048
H9	14	319075	482324
H10	14
H11	14
H12	14
A1	15	286656	345331
A2	15	317711	397068
A3	15	273980	344115
A4	15	245986	312975
A5	15	397683	487751
A6	15	276490	335089
A7	15	502656	379726
A8	15	506264	378736
A9	15	574543	415200
A10	15	278706	393287
A11	15	471467	548664
A12	15	391572	443472
B1	15	252067	316440
B2	15	331739	380829
B3	15	271679	310578
B4	15	251763	358783
B5	15	362551	450317
B6	15	243263	313623
B7	15	562696	359162
B8	15	582851	353217
B9	15	573720	347445
B10	15	251830	395082
B11	15	420622	532159
B12	15	324632	430714
C1	15	337351	382925
C2	15	330324	393527
C3	15	280766	351211
C4	15	248847	336484
C5	15	394979	453203
C6	15	252489	341591
C7	15	321079	398068
C8	15	295326	367267
C9	15	282897	349106
C10	15	268334	433226
C11	15	432117	569757
C12	15	344667	467966
D1	15	363352	445523
D2	15	389027	472486
D3	15	327834	401267
D4	15	305067	382856
D5	15	452778	558433
D6	15	300237	374736
D7	15	310321	428254
D8	15	243694	372287
D9	15	254781	383563
D10	15	284426	420898
D11	15	443027	542567
D12	15	363164	459409
E1	15	370701	504092
E2	15	399098	550821
E3	15	389728	502888
E4	15	363616	450350
E5	15	535678	564461
E6	15	359724	430840
E7	15	428311	482955
E8	15	397983	476848
E9	15	389849	470690
E10	15	699618	452553
E11	15	873614	556080
E12	15	745573	493836
F1	15	349640	442576
F2	15	411575	510780
F3	15	375509	459576
F4	15	355775	486760
F5	15	617040	705015
F6	15	375253	458841
F7	15	530108	493829
F8	15	530422	478241
F9	15	529312	465128
F10	15	1.02393e+06	531797
F11	15	1.13558e+06	628999
F12	15	1.01878e+06	559467
G1	15	356227	477863
G2	15	443343	517563
G3	15	436427	507333
G4	15	403255	510690
G5	15	604779	662918
G6	15	391030	485385
G7	15	333692	506561
G8	15	315048	475819
G9	15	334683	512463
G10	15	644407	480082
G11	15	862081	610010
G12	15	853267	605871
H1	15	407969	512955
H2	15	445616	529906
H3	15	403573	484566
H4	15
H5	15
H6	15
H7	15	364863	535517
H8	15	334334	466302
H9	15	319397	482368
H10	15
H11	15
H12	15
A1	16	287023	345078
A2	16	317757	396767
A3	16	273274	343830
A4	16	246505	312118
A5	16	398065	487203
A6	16	276272	335507
A7	16	624507	379914
A8	16	638113	378666
A9	16	721360	415331
A10	16	289877	393978
A11	16	485793	548788
A12	16	401937	441874
B1	16	252332	315966
B2	16	331784	381279
B3	16	272447	310254
B4	16	252208	359022
B5	16	362868	450056
B6	16	243320	313684
B7	16	684440	359585
B8	16	717382	353488
B9	16	708183	347422
B10	16	252876	395402
B11	16	421431	532042
B12	16	324607	430798
C1	16	337809	382464
C2	16	330506	393396
C3	16	280080	351046
C4	16	249609	336327
C5	16	395043	453271
C6	16	252238	341324
C7	16	369519	398325
C8	16	341349	367124
C9	16	323356	348967
C10	16	272290	433175
C11	16	436914	570546
C12	16	349338	466983
D1	16	363351	445528
D2	16	389504	472567
D3	16	327892	400533
D4	16	305029	383466
D5	16	453693	557946
D6	16	300509	374628
D7	16	323684	428097
D8	16	253692	371834
D9	16	267724	383483
D10	16	290155	421674
D11	16	450732	542629
D12	16	369432	459884
E1	16	370924	504175
E2	16	399779	550589
E3	16	389647	503262
E4	16	364414	450420
E5	16	536495	564257
E6	16	360308	430425
E7	16	459574	483677
E8	16	466026	477442
E9	16	455779	470639
E10	16	840930	452386
E11	16	1.02967e+06	556218
E12	16	882330	492968
F1	16	349623	441787
F2	16	412392	510675
F3	16	375499	459522
F4	16	356269	485830
F5	16	616959	702125
F6	16	374653	458456
F7	16	656691	493855
F8	16	654731	478395
F9	16	650416	464923
F10	16	1.16815e+06	531753
F11	16	1277738	630614
F12	16	1.1497e+06	559570
G1	16	356937	478635
G2	16	443774	518248
G3	16	436824	507595
G4	16	404129	510682
G5	16	605239	662342
G6	16	391584	485451
G7	16	340473	506683
G8	16	321851	475618
G9	16	340961	512863
G10	16	778139	480287
G11	16	1.02759e+06	609681
G12	16	1.02868e+06	605296
H1	16	407094	513314
H2	16	447023	530530
H3	16	403689	484555
H4	16
H5	16
H6	16
H7	16	366220	535420
H8	16	334860	465998
H9	16	321122	482509
H10	16
H11	16
H12	16
A1	17	286058	344655
A2	17	317364	396198
A3	17	274055	343357
A4	17	246014	312241
A5	17	398558	487406
A6	17	276751	334862
A7	17	741426	379838
A8	17	769919	378713
A9	17	863533	415447
A10	17	309725	393452
A11	17	512931	547480
A12	17	422233	441474
B1	17	252014	316746
B2	17	331323	381760
B3	17	272340	310244
B4	17	252272	358846
B5	17	362956	449551
B6	17	243622	313969
B7	17	788122	359203
B8	17	829369	353110
B9	17	821951	347408
B10	17	253737	395199
B11	17	422604	531976
B12	17	325648	430979
C1	17	337049	382537
C2	17	330566	393328
C3	17	280269	350871
C4	17	249024	336914
C5	17	396276	453752
C6	17	252739	341843
C7	17	444976	398200
C8	17	413337	367054
C9	17	386844	348844
C10	17	280473	433014
C11	17	446007	570216
C12	17	357317	467313
D1	17	363047	445634
D2	17	389445	472474
D3	17	328927	400941
D4	17	305552	383555
D5	17	453932	558530
D6	17	300409	374946
D7	17	346824	428072
D8	17	272966	372179
D9	17	290287	383310
D10	17	300946	421514
D11	17	464634	541839
D12	17	381831	459766
E1	17	370793	504352
E2	17	399107	550693
E3	17	389837	503316
E4	17	364642	450299
E5	17	537045	564032
E6	17	360640	430633
E7	17	504406	483473
E8	17	557689	477621
E9	17	547051	470848
E10	17	963612	452291
E11	17	1.16079e+06	555185
E12	17	997148	493125
F1	17	349125	441793
F2	17	412571	510588
F3	17	376252	459148
F4	17	356573	486089
F5	17	617068	702094
F6	17	375330	458531
F7	17	802509	493109
F8	17	795528	478646
F9	17	787300	464292
F10	17	1286203	531412
F11	17	1.39358e+06	631497
F12	17	1.25982e+06	559770
G1	17	357070	478191
G2	17	444652	517987
G3	17	437135	507611
G4	17	404326	510322
G5	17	605949	662337
G6	17	391199	484898
G7	17	353003	506462
G8	17	332647	475513
G9	17	353974	512949
G10	17	905051	480683
G11	17	1.17431e+06	609356
G12	17	1.19064e+06	604985
H1	17	408147	511932
H2	17	445995	530370
H3	17	404010	484222
H4	17
H5	17
H6	17
H7	17	368356	535257
H8	17	335141	466100
H9	17	323152	482351
H10	17
H11	17
H12	17
A1	18	286547	343982
A2	18	317434	396228
A3	18	273512	343620
A4	18	246094	312480
A5	18	397759	487538
A6	18	276336	335015
A7	18	843228	379605
A8	18	878225	378885
A9	18	985884	415392
A10	18	346238	393328
A11	18	562292	547965
A12	18	459726	441048
B1	18	252425	316372
B2	18	331967	380601
B3	18	272502	310268
B4	18	252500	358436
B5	18	363218	449465
B6	18	243574	313620
B7	18	877191	359230
B8	18	924908	353250
B9	18	919102	347566
B10	18	256258	395232
B11	18	424943	532730
B12	18	327777	430466
C1	18	337523	381792
C2	18	330518	392868
C3	18	280603	350618
C4	18	249395	336471
C5	18	396032	453358
C6	18	252823	341141
C7	18	550235	398416
C8	18	514045	367189
C9	18	477856	348652
C10	18	295933	433339
C11	18	463495	570104
C12	18	372478	467725
D1	18	363695	445203
D2	18	389581	472002
D3	18	328838	400378
D4	18	305598	383566
D5	18	453759	558566
D6	18	300785	374650
D7	18	389479	428062
D8	18	306815	372227
D9	18	330781	383571
D10	18	321179	421307
D11	18	490544	542176
D12	18	404288	459933
E1	18	371356	504023
E2	18	398845	550755
E3	18	390980	502563
E4	18	364914	449788
E5	18	537755	563604
E6	18	360923	430600
E7	18	565351	483602
E8	18	666799	477586
E9	18	657073	470851
E10	18	1.07725e+06	451762
E11	18	1284654	554991
E12	18	1.10682e+06	492595
F1	18	349550	441548
F2	18	412635	510320
F3	18	376031	459481
F4	18	356722	484893
F5	18	617614	702461
F6	18	375958	457786
F7	18	941719	493052
F8	18	928718	478303
F9	18	924611	464982
F10	18	1.38924e+06	531837
F11	18	1501106	628675
F12	18	1.35319e+06	559893
G1	18	356993	478007
G2	18	443996	518054
G3	18	436920	508261
G4	18	404742	510849
G5	18	606272	661751
G6	18	392098	484951
G7	18	375933	506896
G8	18	354121	475941
G9	18	374959	512784
G10	18	1022559	480472
G11	18	1.30892e+06	610137
G12	18	1.3365e+06	605575
H1	18	408051	511433
H2	18	446060	530451
H3	18	403422	484878
H4	18
H5	18
H6	18
H7	18	371961	535057
H8	18	338358	465659
H9	18	327352	482489
H10	18
H11	18
H12	18
A1	19	285880	344329
A2	19	317453	396404
A3	19	274036	342830
A4	19	246668	312088
A5	19	398404	487741
A6	19	276647	335616
A7	19	921880	379852
A8	19	966009	379218
A9	19	1.08236e+06	415950
A10	19	408704	393962
A11	19	646106	548458
A12	19	523405	441388
B1	19	251098	315932
B2	19	331582	380598
B3	19	271980	310346
B4	19	252362	358465
B5	19	362765	449559
B6	19	243619	313947
B7	19	949291	359047
B8	19	1.0026e+06	353233
B9	19	1.00096e+06	347478
B10	19	259700	395036
B11	19	430175	531945
B12	19	331537	431195
C1	19	337799	382010
C2	19	330285	392216
C3	19	280696	350554
C4	19	249970	336616
C5	19	395815	453713
C6	19	252819	341740
C7	19	670282	397741
C8	19	628028	367098
C9	19	582793	348888
C10	19	322256	433325
C11	19	494148	569716
C12	19	398344	467290
D1	19	363665	445164
D2	19	389596	472082
D3	19	328769	400417
D4	19	305569	383830
D5	19	453882	558961
D6	19	300919	375012
D7	19	456744	427651
D8	19	360611	372393
D9	19	396121	383249
D10	19	357532	420991
D11	19	535935	543085
D12	19	445642	459822
E1	19	371288	504019
E2	19	398383	550263
E3	19	390637	503449
E4	19	364750	450688
E5	19	538128	563325
E6	19	361273	430105
E7	19	632749	483543
E8	19	775658	477888
E9	19	768990	470967
E10	19	1.17144e+06	452092
E11	19	1.38876e+06	554847
E12	19	1.19668e+06	492927
F1	19	350536	441471
F2	19	412702	510232
F3	19	376099	459458
F4	19	357100	485248
F5	19	617727	701634
F6	19	376144	457727
F7	19	1.05738e+06	492845
F8	19	1.03759e+06	478000
F9	19	1.04232e+06	465037
F10	19	1.47285e+06	531744
F11	19	1585553	630151
F12	19	1.4316e+06	560635
G1	19	356646	477553
G2	19	443942	518177
G3	19	436715	508562
G4	19	405022	510897
G5	19	605828	662678
G6	19	391804	484894
G7	19	418596	506353
G8	19	391795	475804
G9	19	414684	512745
G10	19	1.12241e+06	480251
G11	19	1.42562e+06	610062
G12	19	1.46241e+06	605008
H1	19	406427	511485
H2	19	445606	530036
H3	19	403173	484749
H4	19
H5	19
H6	19
H7	19	379061	535114
H8	19	342238	465551
H9	19	334403	482759
H10	19
H11	19
H12	19
A1	20	286801	344511
A2	20	316829	396326
A3	20	274305	343277
A4	20	246175	312162
A5	20	398472	487550
A6	20	276489	335416
A7	20	993429	380285
A8	20	1044411	378932
A9	20	1.17078e+06	415665
A10	20	506081	393273
A11	20	779377	547788
A12	20	623854	440548
B1	20	251867	315928
B2	20	332583	380679
B3	20	272069	310290
B4	20	251916	358583
B5	20	363158	449971
B6	20	244195	313885
B7	20	1.01082e+06	359398
B8	20	1.0682e+06	353127
B9	20	1.0682e+06	347439
B10	20	267345	395106
B11	20	438803	532749
B12	20	338362	430806
C1	20	336997	381981
C2	20	330580	392441
C3	20	280700	350685
C4	20	250101	336699
C5	20	396735	454104
C6	20	253207	341467
C7	20	782379	397764
C8	20	740653	367199
C9	20	690047	348941
C10	20	367345	433340
C11	20	547011	569963
C12	20	443120	467408
D1	20	363702	445673
D2	20	389330	471927
D3	20	328811	400278
D4	20	305643	383195
D5	20	454488	559099
D6	20	300807	374812
D7	20	553785	428019
D8	20	437048	371799
D9	20	488361	383780
D10	20	417832	421940
D11	20	613809	542626
D12	20	514369	459363
E1	20	371494	503917
E2	20	398337	550662
E3	20	391074	502824
E4	20	365240	450094
E5	20	538696	563265
E6	20	361569	430200
E7	20	703735	483283
E8	20	874957	478172
E9	20	871615	471464
E10	20	1.25148e+06	452077
E11	20	1473446	555613
E12	20	1.26975e+06	492763
F1	20	349894	441370
F2	20	413468	509949
F3	20	377007	459501
F4	20	357273	485292
F5	20	618072	702372
F6	20	375278	457640
F7	20	1.15875e+06	492949
F8	20	1.13119e+06	477863
F9	20	1.14298e+06	464781
F10	20	1.53865e+06	531396
F11	20	1.65171e+06	629584
F12	20	1492134	558940
G1	20	357157	478063
G2	20	444393	518707
G3	20	437095	508528
G4	20	405787	510842
G5	20	606282	662346
G6	20	392028	485512
G7	20	488824	506304
G8	20	456408	476200
G9	20	481255	512936
G10	20	1.20737e+06	480494
G11	20	1.52473e+06	609866
G12	20	1.56643e+06	605420
H1	20	407842	511347
H2	20	445547	530054
H3	20	403446	484805
H4	20
H5	20
H6	20
H7	20	391813	534974
H8	20	350942	466311
H9	20	347129	482575
H10	20
H11	20
H12	20
A1	21	286442	344178
A2	21	316883	395875
A3	21	274203	343639
A4	21	246397	312117
A5	21	398996	487331
A6	21	276738	335643
A7	21	1.04716e+06	380132
A8	21	1.10636e+06	379150
A9	21	1.23621e+06	415978
A10	21	630262	393748
A11	21	950249	548559
A12	21	757168	440482
B1	21	251362	315602
B2	21	331647	380592
B3	21	272559	310566
B4	21	252898	358648
B5	21	363396	449530
B6	21	243604	314185
B7	21	1.06134e+06	359401
B8	21	1.11958e+06	353226
B9	21	1.12316e+06	347778
B10	21	281530	395421
B11	21	456514	531916
B12	21	354066	430368
C1	21	337231	381558
C2	21	330690	392293
C3	21	281203	350426
C4	21	250063	336500
C5	21	396942	453405
C6	21	253249	341783
C7	21	877921	398030
C8	21	838072	367347
C9	21	785061	349052
C10	21	435553	433848
C11	21	627889	569832
C12	21	512332	467033
D1	21	363815	445054
D2	21	389917	471698
D3	21	329173	400497
D4	21	306152	383673
D5	21	454247	559199
D6	21	300573	374930
D7	21	666868	428258
D8	21	523214	372151
D9	21	595197	383571
D10	21	507929	421865
D11	21	727109	543309
D12	21	616436	459779
E1	21	371373	503894
E2	21	398131	550267
E3	21	391223	502585
E4	21	365887	449547
E5	21	539435	562662
E6	21	361713	430283
E7	21	776681	483284
E8	21	965750	478092
E9	21	963499	471091
E10	21	1.31473e+06	452054
E11	21	1.5437e+06	553824
E12	21	1.33238e+06	492494
F1	21	350356	441099
F2	21	413233	509909
F3	21	375906	459368
F4	21	357832	484513
F5	21	618374	700949
F6	21	376516	456874
F7	21	1244440	493195
F8	21	1.21337e+06	478139
F9	21	1.22891e+06	464856
F10	21	1.59394e+06	530965
F11	21	1.71025e+06	631018
F12	21	1.54299e+06	560063
G1	21	357475	478094
[truncated: 10,967 more rows]

## Sheet: Amplification Data
Block Type	96alum
Chemistry	SYBR_GREEN
Experiment File Name	D:\HAIFENG\1114Untitled.eds
Experiment Run End Time	2013-01-09 02:40:37 AM CST
Instrument Type	sds7500
Passive Reference	ROX
Well	Cycle	Target Name	Rn	ΔRn
A1	1	CBF10	0.813807	-0.00514361
A1	2	CBF10	0.81098	-0.00844216
A1	3	CBF10	0.810451	-0.00944259
A1	4	CBF10	0.811534	-0.00883137
A1	5	CBF10	0.814392	-0.00644434
A1	6	CBF10	0.819971	-0.00133714
A1	7	CBF10	0.818253	-0.0035271
A1	8	CBF10	0.82071	-0.00154152
A1	9	CBF10	0.822954	0.000230921
A1	10	CBF10	0.824093	0.000898647
A1	11	CBF10	0.824746	0.00108042
A1	12	CBF10	0.827384	0.00324607
A1	13	CBF10	0.826901	0.00229177
A1	14	CBF10	0.829015	0.00393416
A1	15	CBF10	0.830091	0.00453858
A1	16	CBF10	0.831764	0.00574025
A1	17	CBF10	0.829984	0.00348854
A1	18	CBF10	0.833029	0.00606177
A1	19	CBF10	0.830254	0.00281514
A1	20	CBF10	0.832487	0.00457714
A1	21	CBF10	0.832251	0.00386967
A1	22	CBF10	0.830648	0.00179523
A1	23	CBF10	0.830643	0.00131849
A1	24	CBF10	0.833157	0.00336129
A1	25	CBF10	0.832838	0.00257007
A1	26	CBF10	0.831133	0.000393944
A1	27	CBF10	0.832717	0.0015065
A1	28	CBF10	0.834031	0.00234857
A1	29	CBF10	0.831725	-0.000429447
A1	30	CBF10	0.83231	-0.000315627
A1	31	CBF10	0.831618	-0.0014786
A1	32	CBF10	0.830734	-0.00283481
A1	33	CBF10	0.832749	-0.00129071
A1	34	CBF10	0.834032	-0.000479517
A1	35	CBF10	0.831685	-0.00329795
A1	36	CBF10	0.832796	-0.00265871
A1	37	CBF10	0.832684	-0.0032428
A1	38	CBF10	0.832128	-0.00426975
A1	39	CBF10	0.832224	-0.00464517
A1	40	CBF10	0.830857	-0.00648429
A2	1	CBF10	0.787695	-0.0124344
A2	2	CBF10	0.793025	-0.0069697
A2	3	CBF10	0.794818	-0.00504019
A2	4	CBF10	0.79408	-0.00564317
A2	5	CBF10	0.79459	-0.00499708
A2	6	CBF10	0.797246	-0.00220563
A2	7	CBF10	0.798111	-0.0012053
A2	8	CBF10	0.799199	1.81236e-05
A2	9	CBF10	0.798276	-0.000768914
A2	10	CBF10	0.799474	0.000564781
A2	11	CBF10	0.798061	-0.000712505
A2	12	CBF10	0.800861	0.00222318
A2	13	CBF10	0.798766	0.000264259
A2	14	CBF10	0.802413	0.00404657
A2	15	CBF10	0.800142	0.00191104
A2	16	CBF10	0.800866	0.00277058
A2	17	CBF10	0.801023	0.00306334
A2	18	CBF10	0.801141	0.00331712
A2	19	CBF10	0.800832	0.00314389
A2	20	CBF10	0.799415	0.00186261
A2	21	CBF10	0.800462	0.00304544
A2	22	CBF10	0.799751	0.00246935
A2	23	CBF10	0.798882	0.00173631
A2	24	CBF10	0.798233	0.00122286
A2	25	CBF10	0.799859	0.00298428
A2	26	CBF10	0.797537	0.000798079
A2	27	CBF10	0.7984	0.00179668
A2	28	CBF10	0.79718	0.000712629
A2	29	CBF10	0.798519	0.00218729
A2	30	CBF10	0.795144	-0.0010526
A2	31	CBF10	0.794025	-0.00203568
A2	32	CBF10	0.794945	-0.000979798
A2	33	CBF10	0.793239	-0.00254992
A2	34	CBF10	0.793622	-0.00203186
A2	35	CBF10	0.794148	-0.00137014
A2	36	CBF10	0.795118	-0.000264377
A2	37	CBF10	0.791883	-0.00336419
A2	38	CBF10	0.793163	-0.00194777
A2	39	CBF10	0.791006	-0.00396928
A2	40	CBF10	0.790101	-0.00473933
A3	1	CBF10	0.777076	-0.00903178
A3	2	CBF10	0.779345	-0.00724068
A3	3	CBF10	0.779101	-0.00796281
A3	4	CBF10	0.780863	-0.00667835
A3	5	CBF10	0.78117	-0.00685003
A3	6	CBF10	0.786194	-0.0023043
A3	7	CBF10	0.787323	-0.00165338
A3	8	CBF10	0.789617	0.00016258
A3	9	CBF10	0.79079	0.000857431
A3	10	CBF10	0.790828	0.000417589
A3	11	CBF10	0.791245	0.000356772
A3	12	CBF10	0.793234	0.00186731
A3	13	CBF10	0.79449	0.00264531
A3	14	CBF10	0.79544	0.00311718
A3	15	CBF10	0.796187	0.00338556
A3	16	CBF10	0.794793	0.00151408
A3	17	CBF10	0.798163	0.00440625
A3	18	CBF10	0.795971	0.00173589
A3	19	CBF10	0.799335	0.00462163
A3	20	CBF10	0.799078	0.00388602
A3	21	CBF10	0.797938	0.00226857
A3	22	CBF10	0.799875	0.00372738
A3	23	CBF10	0.798759	0.00213341
A3	24	CBF10	0.799032	0.00192853
A3	25	CBF10	0.800544	0.00296152
A3	26	CBF10	0.800029	0.00196866
A3	27	CBF10	0.800223	0.00168439
A3	28	CBF10	0.798321	-0.000695822
A3	29	CBF10	0.800989	0.00149409
A3	30	CBF10	0.80096	0.000987135
A3	31	CBF10	0.798944	-0.00150704
A3	32	CBF10	0.802287	0.00135837
A3	33	CBF10	0.798861	-0.00254599
A3	34	CBF10	0.799759	-0.00212645
A3	35	CBF10	0.800568	-0.00179501
A3	36	CBF10	0.800403	-0.0024387
A3	37	CBF10	0.800361	-0.00295847
A3	38	CBF10	0.798497	-0.00530042
A3	39	CBF10	0.799607	-0.00466893
A3	40	CBF10	0.800096	-0.00465804
A4	1	CBF10	0.76986	-0.0111721
A4	2	CBF10	0.774792	-0.00655717
A4	3	CBF10	0.77513	-0.00653723
A4	4	CBF10	0.776162	-0.00582247
A4	5	CBF10	0.780448	-0.00185438
A4	6	CBF10	0.781726	-0.000893582
A4	7	CBF10	0.782788	-0.000149445
A4	8	CBF10	0.782016	-0.00123952
A4	9	CBF10	0.783561	-1.16348e-05
A4	10	CBF10	0.784362	0.000471135
A4	11	CBF10	0.785232	0.00102376
A4	12	CBF10	0.784502	-2.31613e-05
A4	13	CBF10	0.785966	0.00112283
A4	14	CBF10	0.787302	0.00214133
A4	15	CBF10	0.785959	0.000480773
A4	16	CBF10	0.789781	0.00398484
A4	17	CBF10	0.787895	0.00178177
A4	18	CBF10	0.787551	0.00111929
A4	19	CBF10	0.790381	0.00363178
A4	20	CBF10	0.788613	0.00154631
A4	21	CBF10	0.789439	0.00205471
A4	22	CBF10	0.790251	0.00254964
A4	23	CBF10	0.790712	0.00269284
A4	24	CBF10	0.788861	0.000523799
A4	25	CBF10	0.790528	0.00187352
A4	26	CBF10	0.789391	0.000419257
A4	27	CBF10	0.791363	0.00207379
A4	28	CBF10	0.790622	0.00101483
A4	29	CBF10	0.790539	0.000614499
A4	30	CBF10	0.791496	0.00125391
A4	31	CBF10	0.789116	-0.00144436
A4	32	CBF10	0.793079	0.00220109
A4	33	CBF10	0.78988	-0.00131549
A4	34	CBF10	0.790624	-0.000888748
A4	35	CBF10	0.789972	-0.00185848
A4	36	CBF10	0.788953	-0.0031955
A4	37	CBF10	0.790139	-0.00232667
A4	38	CBF10	0.789393	-0.00339058
A4	39	CBF10	0.789476	-0.00362444
A4	40	CBF10	0.79067	-0.00274834
A5	1	CBF10	0.80058	-0.00674673
A5	2	CBF10	0.798478	-0.00919347
A5	3	CBF10	0.800674	-0.00734181
A5	4	CBF10	0.80149	-0.00686971
A5	5	CBF10	0.80353	-0.00517452
A5	6	CBF10	0.80638	-0.0026687
A5	7	CBF10	0.807332	-0.002061
A5	8	CBF10	0.808543	-0.00119431
A5	9	CBF10	0.809492	-0.000589887
A5	10	CBF10	0.810619	0.000192101
A5	11	CBF10	0.811414	0.000643046
A5	12	CBF10	0.812157	0.00104172
A5	13	CBF10	0.812253	0.000793439
A5	14	CBF10	0.814951	0.00314696
A5	15	CBF10	0.815339	0.00319051
A5	16	CBF10	0.817041	0.00454786
A5	17	CBF10	0.817712	0.00487465
A5	18	CBF10	0.81585	0.0026686
A5	19	CBF10	0.816835	0.00330867
A5	20	CBF10	0.817295	0.00342398
A5	21	CBF10	0.818737	0.00452199
A5	22	CBF10	0.819096	0.00453627
A5	23	CBF10	0.817216	0.00231204
A5	24	CBF10	0.818353	0.00310452
A5	25	CBF10	0.818087	0.0024942
A5	26	CBF10	0.817416	0.00147834
A5	27	CBF10	0.81613	-0.000151519
A5	28	CBF10	0.816474	-0.000152199
A5	29	CBF10	0.817601	0.000630862
A5	30	CBF10	0.818293	0.000978154
A5	31	CBF10	0.818535	0.000875908
A5	32	CBF10	0.818326	0.000322037
A5	33	CBF10	0.816605	-0.00174329
A5	34	CBF10	0.816509	-0.00218325
A5	35	CBF10	0.816312	-0.00272503
A5	36	CBF10	0.816106	-0.0032752
A5	37	CBF10	0.815533	-0.00419308
A5	38	CBF10	0.816194	-0.00387583
A5	39	CBF10	0.815528	-0.00488651
A5	40	CBF10	0.815208	-0.00555136
A6	1	CBF10	0.809149	-0.013937
A6	2	CBF10	0.814557	-0.00844322
A6	3	CBF10	0.814456	-0.00845975
A6	4	CBF10	0.815834	-0.00699617
A6	5	CBF10	0.819613	-0.0031316
A6	6	CBF10	0.820119	-0.00253992
A6	7	CBF10	0.821223	-0.001351
A6	8	CBF10	0.821115	-0.00137343
A6	9	CBF10	0.823325	0.000921992
A6	10	CBF10	0.82347	0.00115271
A6	11	CBF10	0.825125	0.00289297
A6	12	CBF10	0.822866	0.000719529
A6	13	CBF10	0.824013	0.00195124
A6	14	CBF10	0.825043	0.00306709
A6	15	CBF10	0.825123	0.00323277
A6	16	CBF10	0.823447	0.00164143
A6	17	CBF10	0.826462	0.00474223
A6	18	CBF10	0.824848	0.00321389
A6	19	CBF10	0.824296	0.00274711
A6	20	CBF10	0.824315	0.00285135
A6	21	CBF10	0.8245	0.00312223
A6	22	CBF10	0.82389	0.00259698
A6	23	CBF10	0.823278	0.00207102
A6	24	CBF10	0.82316	0.00203792
A6	25	CBF10	0.822446	0.00140985
A6	26	CBF10	0.821708	0.000756987
A6	27	CBF10	0.821942	0.00107627
A6	28	CBF10	0.821351	0.000570394
A6	29	CBF10	0.8205	-0.000194647
A6	30	CBF10	0.820583	-2.64574e-05
A6	31	CBF10	0.817776	-0.00274802
A6	32	CBF10	0.819074	-0.00136473
A6	33	CBF10	0.818663	-0.00169031
A6	34	CBF10	0.819774	-0.000494057
A6	35	CBF10	0.817955	-0.00222803
A6	36	CBF10	0.817076	-0.00302091
A6	37	CBF10	0.817309	-0.00270269
A6	38	CBF10	0.817129	-0.00279754
A6	39	CBF10	0.818184	-0.00165672
A6	40	CBF10	0.814808	-0.00494739
A7	1	18S	0.651176	0.000556421
A7	2	18S	0.652224	-0.00211279
A7	3	18S	0.658836	0.000782156
A7	4	18S	0.661608	-0.000162333
A7	5	18S	0.664366	-0.00112143
A7	6	18S	0.668806	-0.000398773
A7	7	18S	0.673822	0.000900376
A7	8	18S	0.680407	0.0037679
A7	9	18S	0.690489	0.0101329
A7	10	18S	0.706877	0.0228041
A7	11	18S	0.738546	0.0507563
A7	12	18S	0.795183	0.103676
A7	13	18S	0.898391	0.203167
A7	14	18S	1.06991	0.370967
A7	15	18S	1.32373	0.621074
A7	16	18S	1.64381	0.937436
A7	17	18S	1.95195	1.24186
A7	18	18S	2.22133	1.50752
A7	19	18S	2.42694	1.70942
A7	20	18S	2.61233	1.89109
A7	21	18S	2.75473	2.02977
A7	22	18S	2.87402	2.14534
A7	23	18S	2.97382	2.24143
A7	24	18S	3.05229	2.31618
A7	25	18S	3.1214	2.38157
A7	26	18S	3.18364	2.44009
A7	27	18S	3.22361	2.47634
A7	28	18S	3.26588	2.5149
A7	29	18S	3.30034	2.54564
A7	30	18S	3.33516	2.57675
A7	31	18S	3.35474	2.59261
A7	32	18S	3.36764	2.60179
A7	33	18S	3.4009	2.63134
A7	34	18S	3.41334	2.64006
A7	35	18S	3.42505	2.64805
A7	36	18S	3.44565	2.66493
A7	37	18S	3.45516	2.67073
A7	38	18S	3.47167	2.68352
A7	39	18S	3.48257	2.69071
A7	40	18S	3.48537	2.68979
A8	1	18S	0.62053	0.00385855
A8	2	18S	0.622096	0.00149298
A8	3	18S	0.626194	0.00165852
A8	4	18S	0.628295	-0.000171918
A8	5	18S	0.63036	-0.00203901
A8	6	18S	0.635466	-0.000864069
A8	7	18S	0.640503	0.000240245
A8	8	18S	0.64537	0.00117624
A8	9	18S	0.655367	0.00724121
A8	10	18S	0.673306	0.0212481
A8	11	18S	0.706113	0.0501232
A8	12	18S	0.767982	0.10806
A8	13	18S	0.879353	0.2155
A8	14	18S	1.06231	0.394525
A8	15	18S	1.33672	0.665005
A8	16	18S	1.68516	1.00951
A8	17	18S	2.03299	1.35341
A8	18	18S	2.31792	1.63441
A8	19	18S	2.54737	1.85993
A8	20	18S	2.7562	2.06482
A8	21	18S	2.918	2.22269
A8	22	18S	3.05502	2.35579
A8	23	18S	3.16267	2.4595
A8	24	18S	3.25227	2.54517
A8	25	18S	3.32217	2.61113
A8	26	18S	3.39909	2.68413
A8	27	18S	3.44801	2.72911
A8	28	18S	3.49667	2.77384
A8	29	18S	3.54372	2.81696
A8	30	18S	3.58022	2.84953
A8	31	18S	3.612	2.87738
A8	32	18S	3.63582	2.89727
A8	33	18S	3.66031	2.91782
A8	34	18S	3.68641	2.93999
A8	35	18S	3.70498	2.95463
A8	36	18S	3.72008	2.96579
A8	37	18S	3.74076	2.98255
A8	38	18S	3.75707	2.99493
A8	39	18S	3.77361	3.00753
A8	40	18S	3.78299	3.01298
A9	1	18S	0.645938	0.00152357
A9	2	18S	0.648978	0.00130255
A9	3	18S	0.651461	0.000523508
A9	4	18S	0.653981	-0.000218278
A9	5	18S	0.656997	-0.000463736
A9	6	18S	0.66021	-0.000511724
A9	7	18S	0.664654	0.00067023
A9	8	18S	0.670602	0.00335684
A9	9	18S	0.682334	0.0118273
A9	10	18S	0.700296	0.0265276
A9	11	18S	0.734304	0.0572735
A9	12	18S	0.798578	0.118286
A9	13	18S	0.912829	0.229275
A9	14	18S	1.102	0.41518
A9	15	18S	1.38378	0.693699
A9	16	18S	1.73683	1.04349
A9	17	18S	2.07856	1.38196
A9	18	18S	2.37338	1.67352
A9	19	18S	2.60215	1.89902
A9	20	18S	2.81664	2.11026
A9	21	18S	2.97182	2.26217
A9	22	18S	3.11046	2.39755
A9	23	18S	3.21596	2.49979
A9	24	18S	3.30275	2.58331
A9	25	18S	3.37982	2.65713
A9	26	18S	3.4496	2.72365
A9	27	18S	3.50018	2.77096
A9	28	18S	3.54168	2.8092
A9	29	18S	3.58797	2.85223
A9	30	18S	3.62152	2.88252
A9	31	18S	3.65687	2.91461
A9	32	18S	3.68589	2.94037
A9	33	18S	3.70548	2.95669
A9	34	18S	3.72679	2.97474
A9	35	18S	3.74942	2.99411
A9	36	18S	3.76058	3.00201
A9	37	18S	3.78368	3.02185
A9	38	18S	3.79686	3.03177
A9	39	18S	3.80782	3.03946
A9	40	18S	3.81557	3.04395
A10	1	18S	0.660172	0.00209532
A10	2	18S	0.662428	0.00226493
A10	3	18S	0.66254	0.000290925
A10	4	18S	0.664552	0.000215502
A10	5	18S	0.66633	-9.30342e-05
A10	6	18S	0.668669	0.000159667
A10	7	18S	0.671369	0.000772976
A10	8	18S	0.672312	-0.000370085
A10	9	18S	0.674791	2.2627e-05
A10	10	18S	0.675397	-0.00145851
A10	11	18S	0.677342	-0.00159986
A10	12	18S	0.680504	-0.00052485
A10	13	18S	0.6857	0.00258464
A10	14	18S	0.695013	0.00981097
A10	15	18S	0.708657	0.0213689
A10	16	18S	0.735771	0.0463965
A10	17	18S	0.787198	0.0957364
A10	18	18S	0.880279	0.186732
A10	19	18S	1.03742	0.341785
A10	20	18S	1.28684	0.589123
A10	21	18S	1.60067	0.900867
A10	22	18S	1.92636	1.22446
A10	23	18S	2.20642	1.50244
A10	24	18S	2.45325	1.74719
A10	25	18S	2.64803	1.93987
A10	26	18S	2.82428	2.11404
A10	27	18S	2.96495	2.25262
A10	28	18S	3.08525	2.37084
A10	29	18S	3.17485	2.45835
A10	30	18S	3.25515	2.53656
A10	31	18S	3.32458	2.60391
A10	32	18S	3.37458	2.65182
A10	33	18S	3.43021	2.70536
A10	34	18S	3.46626	2.73933
A10	35	18S	3.50914	2.78012
A10	36	18S	3.54768	2.81657
A10	37	18S	3.57782	2.84463
A10	38	18S	3.60109	2.86582
A10	39	18S	3.62834	2.89097
A10	40	18S	3.65426	2.9148
A11	1	18S	0.826831	0.00487691
A11	2	18S	0.825111	0.00208701
A11	3	18S	0.827292	0.00319894
A11	4	18S	0.825005	-0.000157143
A11	5	18S	0.826717	0.000484812
A11	6	18S	0.826762	-0.000539898
A11	7	18S	0.826972	-0.00139915
A11	8	18S	0.827721	-0.00171903
A11	9	18S	0.827923	-0.0025865
A11	10	18S	0.831055	-0.000524885
A11	11	18S	0.831292	-0.00135707
A11	12	18S	0.834669	0.000950475
A11	13	18S	0.838437	0.00364945
A11	14	18S	0.845424	0.00956701
A11	15	18S	0.8593	0.0223731
A11	16	18S	0.885211	0.0472142
A11	17	18S	0.936894	0.0978284
A11	18	18S	1.02614	0.18601
A11	19	18S	1.17804	0.336838
A11	20	18S	1.42277	0.580498
A11	21	18S	1.73226	0.888919
A11	22	18S	2.07255	1.22813
A11	23	18S	2.35638	1.51089
A11	24	18S	2.61355	1.767
A11	25	18S	2.82762	1.98
A11	26	18S	3.01021	2.16152
A11	27	18S	3.16125	2.31149
A11	28	18S	3.29406	2.44323
A11	29	18S	3.39616	2.54426
A11	30	18S	3.48683	2.63386
A11	31	18S	3.55585	2.70181
A11	32	18S	3.62003	2.76492
A11	33	18S	3.68085	2.82468
A11	34	18S	3.73349	2.87625
A11	35	18S	3.77142	2.91311
A11	36	18S	3.80769	2.9483
A11	37	18S	3.84949	2.98903
A11	38	18S	3.87668	3.01515
A11	39	18S	3.90542	3.04283
A11	40	18S	3.93442	3.07076
A12	1	18S	0.849812	0.00546466
A12	2	18S	0.845397	-0.000250801
A12	3	18S	0.849088	0.00213991
A12	4	18S	0.8487	0.000450444
A12	5	18S	0.848574	-0.000976284
A12	6	18S	0.851038	0.000186988
A12	7	18S	0.852651	0.000499881
A12	8	18S	0.851743	-0.00170886
A12	9	18S	0.852687	-0.00206598
A12	10	18S	0.854815	-0.00123811
A12	11	18S	0.856561	-0.000793725
A12	12	18S	0.858814	0.000158965
A12	13	18S	0.863302	0.00334677
A12	14	18S	0.87139	0.0101333
A12	15	18S	0.882969	0.0204119
A12	16	18S	0.909619	0.0457613
A12	17	18S	0.956416	0.0912577
A12	18	18S	1.04235	0.17589
A12	19	18S	1.18582	0.318056
A12	20	18S	1.41609	0.547026
A12	21	18S	1.71895	0.848592
A12	22	18S	2.04076	1.1691
A12	23	18S	2.32386	1.4509
A12	24	18S	2.57354	1.69928
A12	25	18S	2.7896	1.91404
A12	26	18S	2.97218	2.09532
A12	27	18S	3.12964	2.25147
A12	28	18S	3.25251	2.37304
A12	29	18S	3.35304	2.47227
A12	30	18S	3.44534	2.56328
A12	31	18S	3.52118	2.63781
A12	32	18S	3.5757	2.69103
A12	33	18S	3.63365	2.74768
A12	34	18S	3.68251	2.79524
A12	35	18S	3.72886	2.84028
A12	36	18S	3.76001	2.87014
A12	37	18S	3.80226	2.91109
A12	38	18S	3.82881	2.93634
A12	39	18S	3.87138	2.97761
A12	40	18S	3.89266	2.99758
B1	1	CBF10	0.778771	-0.00881946
B1	2	CBF10	0.781037	-0.00690802
B1	3	CBF10	0.780831	-0.00746927
B1	4	CBF10	0.783071	-0.00558447
B1	5	CBF10	0.783804	-0.00520582
B1	6	CBF10	0.785792	-0.00357284
B1	7	CBF10	0.7884	-0.00131992
B1	8	CBF10	0.790312	0.000236872
B1	9	CBF10	0.791175	0.000745343
B1	10	CBF10	0.791128	0.000343055
B1	11	CBF10	0.790918	-0.000221657
B1	12	CBF10	0.792388	0.000892695
B1	13	CBF10	0.792723	0.000872711
B1	14	CBF10	0.797232	0.00502672
B1	15	CBF10	0.796571	0.0040114
B1	16	CBF10	0.798603	0.00568854
B1	17	CBF10	0.795635	0.00236544
B1	18	CBF10	0.797872	0.0042478
B1	19	CBF10	0.794783	0.00080347
B1	20	CBF10	0.797229	0.00289391
B1	21	CBF10	0.796453	0.00176319
B1	22	CBF10	0.796737	0.00169272
B1	23	CBF10	0.79562	0.00022047
B1	24	CBF10	0.798625	0.00287006
B1	25	CBF10	0.799163	0.00305345
B1	26	CBF10	0.798607	0.00214231
B1	27	CBF10	0.797112	0.000292346
B1	28	CBF10	0.796659	-0.000515075
B1	29	CBF10	0.798194	0.000664425
B1	30	CBF10	0.799994	0.00211024
B1	31	CBF10	0.799697	0.00145761
B1	32	CBF10	0.797385	-0.00120954
B1	33	CBF10	0.79873	-0.000218803
B1	34	CBF10	0.796517	-0.00278754
B1	35	CBF10	0.796548	-0.00311109
B1	36	CBF10	0.796535	-0.00347935
B1	37	CBF10	0.796478	-0.00389058
B1	38	CBF10	0.79845	-0.00227382
B1	39	CBF10	0.797544	-0.00353501
B1	40	CBF10	0.79656	-0.00487369
B2	1	CBF10	0.854893	-0.0064433
B2	2	CBF10	0.854812	-0.00688084
B2	3	CBF10	0.855161	-0.0068884
B2	4	CBF10	0.856632	-0.00577444
B2	5	CBF10	0.858358	-0.00440489
B2	6	CBF10	0.859952	-0.00316725
B2	7	CBF10	0.862142	-0.0013341
B2	8	CBF10	0.862981	-0.000851764
B2	9	CBF10	0.862497	-0.00169248
B2	10	CBF10	0.865877	0.00133122
B2	11	CBF10	0.866275	0.00137218
B2	12	CBF10	0.86477	-0.000488903
B2	13	CBF10	0.865647	3.13379e-05
B2	14	CBF10	0.869668	0.00369549
B2	15	CBF10	0.871098	0.00476922
B2	16	CBF10	0.870186	0.0035009
B2	17	CBF10	0.867884	0.000841532
B2	18	CBF10	0.872219	0.00482075
B2	19	CBF10	0.871215	0.00345921
B2	20	CBF10	0.873657	0.00554545
B2	21	CBF10	0.871398	0.00292971
B2	22	CBF10	0.871282	0.00245646
B2	23	CBF10	0.86993	0.00074856
B2	24	CBF10	0.872264	0.00272554
B2	25	CBF10	0.871934	0.00203908
B2	26	CBF10	0.871142	0.000890872
B2	27	CBF10	0.870868	0.000260326
B2	28	CBF10	0.872415	0.00145064
B2	29	CBF10	0.87168	0.000359174
B2	30	CBF10	0.873087	0.0014093
B2	31	CBF10	0.872142	0.000107487
B2	32	CBF10	0.872219	-0.000172404
B2	33	CBF10	0.869856	-0.00289174
B2	34	CBF10	0.87257	-0.000534598
B2	35	CBF10	0.872056	-0.00140517
B2	36	CBF10	0.870376	-0.00344137
B2	37	CBF10	0.871796	-0.00237801
B2	38	CBF10	0.870699	-0.00383182
B2	39	CBF10	0.8694	-0.00548709
B2	40	CBF10	0.870468	-0.00477641
B3	1	CBF10	0.871482	-0.000528042
B3	2	CBF10	0.869399	-0.00277844
B3	3	CBF10	0.86917	-0.00317507
B3	4	CBF10	0.867703	-0.00480915
B3	5	CBF10	0.868305	-0.00437495
B3	6	CBF10	0.870175	-0.00267261
B3	7	CBF10	0.872258	-0.000757173
B3	8	CBF10	0.87165	-0.00153241
B3	9	CBF10	0.87295	-0.000400364
B3	10	CBF10	0.874526	0.00100861
B3	11	CBF10	0.873346	-0.000338717
B3	12	CBF10	0.874663	0.00081032
B3	13	CBF10	0.872866	-0.00115415
B3	14	CBF10	0.877884	0.00369633
B3	15	CBF10	0.874754	0.000398923
B3	16	CBF10	0.878143	0.00362006
B3	17	CBF10	0.877825	0.00313479
B3	18	CBF10	0.87828	0.00342212
B3	19	CBF10	0.876378	0.00135227
B3	20	CBF10	0.876821	0.00162786
B3	21	CBF10	0.877622	0.00226132
B3	22	CBF10	0.878829	0.00330134
B3	23	CBF10	0.878082	0.00238638
B3	24	CBF10	0.877128	0.00126568
B3	25	CBF10	0.878715	0.0026843
B3	26	CBF10	0.878209	0.00201081
B3	27	CBF10	0.878795	0.00242927
B3	28	CBF10	0.877459	0.000925962
B3	29	CBF10	0.876988	0.000287813
B3	30	CBF10	0.876599	-0.000268559
B3	31	CBF10	0.87914	0.00210494
B3	32	CBF10	0.874848	-0.00235494
B3	33	CBF10	0.875043	-0.00232725
B3	34	CBF10	0.874116	-0.00342173
B3	35	CBF10	0.876176	-0.00152919
B3	36	CBF10	0.87536	-0.00251316
B3	37	CBF10	0.877203	-0.000837101
B3	38	CBF10	0.874371	-0.00383726
B3	39	CBF10	0.87595	-0.00242531
B3	40	CBF10	0.873192	-0.00535132
B4	1	CBF10	0.688646	-0.00573086
B4	2	CBF10	0.688675	-0.00608111
B4	3	CBF10	0.690678	-0.00445653
B4	4	CBF10	0.690261	-0.00525304
B4	5	CBF10	0.692584	-0.00330905
B4	6	CBF10	0.694735	-0.00153701
B4	7	CBF10	0.695052	-0.00159978
B4	8	CBF10	0.695218	-0.001813
B4	9	CBF10	0.698136	0.000725789
B4	10	CBF10	0.697402	-0.000387755
B4	11	CBF10	0.698691	0.00052198
B4	12	CBF10	0.699265	0.000717413
B4	13	CBF10	0.699733	0.000806452
B4	14	CBF10	0.701836	0.00252997
B4	15	CBF10	0.701713	0.00202779
B4	16	CBF10	0.702487	0.00242224
B4	17	CBF10	0.703009	0.00256516
B4	18	CBF10	0.704451	0.00362767
B4	19	CBF10	0.704006	0.00280398
B4	20	CBF10	0.702532	0.00095098
B4	21	CBF10	0.705142	0.0031812
B4	22	CBF10	0.704299	0.00195917
B4	23	CBF10	0.705596	0.00287654
B4	24	CBF10	0.703415	0.000316864
B4	25	CBF10	0.706324	0.00284683
B4	26	CBF10	0.705411	0.00155459
B4	27	CBF10	0.705298	0.00106189
B4	28	CBF10	0.704863	0.000247502
B4	29	CBF10	0.705478	0.000483824
B4	30	CBF10	0.705659	0.00028533
B4	31	CBF10	0.705909	0.000156454
B4	32	CBF10	0.70502	-0.00111248
B4	33	CBF10	0.704422	-0.00208887
B4	34	CBF10	0.705542	-0.00134812
B4	35	CBF10	0.704173	-0.00309687
B4	36	CBF10	0.705892	-0.00175726
B4	37	CBF10	0.706269	-0.00175954
B4	38	CBF10	0.706157	-0.00225004
B4	39	CBF10	0.705886	-0.00290027
B4	40	CBF10	0.704435	-0.00473098
B5	1	CBF10	0.794018	-0.00678004
B5	2	CBF10	0.797304	-0.00368919
B5	3	CBF10	0.795096	-0.00609292
B5	4	CBF10	0.796512	-0.00487252
B5	5	CBF10	0.796694	-0.00488612
B5	6	CBF10	0.798724	-0.00305083
B5	7	CBF10	0.801582	-0.000389012
B5	8	CBF10	0.800068	-0.00209764
B5	9	CBF10	0.801558	-0.000803569
B5	10	CBF10	0.801765	-0.000791532
B5	11	CBF10	0.80408	0.00132789
B5	12	CBF10	0.802466	-0.000481773
B5	13	CBF10	0.805455	0.00231154
B5	14	CBF10	0.805571	0.00223202
B5	15	CBF10	0.805103	0.00156862
B5	16	CBF10	0.806274	0.0025444
B5	17	CBF10	0.807375	0.00344955
B5	18	CBF10	0.808113	0.00399261
B5	19	CBF10	0.806935	0.00261937
B5	20	CBF10	0.80707	0.00255822
B5	21	CBF10	0.80839	0.00368283
B5	22	CBF10	0.807896	0.00299344
B5	23	CBF10	0.808635	0.00353727
B5	24	CBF10	0.808775	0.00348166
B5	25	CBF10	0.807168	0.00167909
B5	26	CBF10	0.807959	0.00227466
B5	27	CBF10	0.807429	0.0015495
B5	28	CBF10	0.807695	0.00162043
B5	29	CBF10	0.806911	0.000640289
B5	30	CBF10	0.807909	0.00144322
B5	31	CBF10	0.806475	-0.000186136
B5	32	CBF10	0.806188	-0.000669235
B5	33	CBF10	0.80501	-0.00204235
B5	34	CBF10	0.806156	-0.0010919
B5	35	CBF10	0.805588	-0.00185502
B5	36	CBF10	0.805588	-0.00205088
B5	37	CBF10	0.803381	-0.00445301
B5	38	CBF10	0.803762	-0.00426753
B5	39	CBF10	0.8028	-0.00542464
B5	40	CBF10	0.803042	-0.00537868
B6	1	CBF10	0.758679	-0.0095466
B6	2	CBF10	0.759036	-0.00944459
B6	3	CBF10	0.760725	-0.00800988
B6	4	CBF10	0.762448	-0.00654198
B6	5	CBF10	0.764753	-0.00449125
B6	6	CBF10	0.765252	-0.00424661
B6	7	CBF10	0.766851	-0.0029019
B6	8	CBF10	0.768642	-0.00136593
B6	9	CBF10	0.770237	-2.55116e-05
B6	10	CBF10	0.771692	0.00117507
B6	11	CBF10	0.772124	0.0013523
B6	12	CBF10	0.771783	0.000756696
B6	13	CBF10	0.77469	0.00340972
B6	14	CBF10	0.774573	0.0030377
B6	15	CBF10	0.775655	0.00386515
B6	16	CBF10	0.775684	0.00364035
B6	17	CBF10	0.775942	0.00364306
B6	18	CBF10	0.776654	0.00410115
B6	19	CBF10	0.775988	0.00318016
B6	20	CBF10	0.777977	0.00491432
B6	21	CBF10	0.775352	0.00203491
B6	22	CBF10	0.778143	0.00457123
B6	23	CBF10	0.776205	0.00237935
B6	24	CBF10	0.777058	0.00297775
B6	25	CBF10	0.774905	0.000569807
B6	26	CBF10	0.776961	0.0023715
B6	27	CBF10	0.776059	0.00121466
B6	28	CBF10	0.774324	-0.000774798
B6	29	CBF10	0.777115	0.00176224
B6	30	CBF10	0.774542	-0.00106603
B6	31	CBF10	0.77509	-0.000772039
B6	32	CBF10	0.775778	-0.00033839
B6	33	CBF10	0.774708	-0.00166367
B6	34	CBF10	0.774244	-0.00238153
B6	35	CBF10	0.773481	-0.00339919
B6	36	CBF10	0.775157	-0.00197783
B6	37	CBF10	0.774079	-0.00331021
B6	38	CBF10	0.773696	-0.00394813
B6	39	CBF10	0.774156	-0.00374223
B6	40	CBF10	0.770628	-0.00752484
B7	1	18S	0.678199	0.000573158
B7	2	18S	0.683148	0.00166907
B7	3	18S	0.685575	0.000243163
B7	4	18S	0.688765	-0.000419623
B7	5	18S	0.693187	0.000149679
B7	6	18S	0.696876	-1.31428e-05
B7	7	18S	0.700782	3.99232e-05
B7	8	18S	0.710275	0.00568039
B7	9	18S	0.72374	0.0152925
B7	10	18S	0.750589	0.0382882
B7	11	18S	0.797522	0.0813686
B7	12	18S	0.882845	0.162839
B7	13	18S	1.02939	0.305535
B7	14	18S	1.25807	0.530354
B7	15	18S	1.56669	0.83513
B7	16	18S	1.90342	1.168
B7	17	18S	2.19409	1.45482
B7	18	18S	2.44187	1.69874
B7	19	18S	2.64392	1.89694
B7	20	18S	2.81253	2.0617
B7	21	18S	2.95308	2.1984
B7	22	18S	3.06367	2.30513
B7	23	18S	3.14681	2.38442
B7	24	18S	3.2309	2.46466
B7	25	18S	3.29146	2.52136
B7	26	18S	3.3427	2.56875
B7	27	18S	3.38539	2.60759
B7	28	18S	3.42508	2.64344
B7	29	18S	3.45582	2.67032
B7	30	18S	3.48585	2.69649
B7	31	18S	3.50837	2.71517
B7	32	18S	3.52545	2.72839
B7	33	18S	3.54141	2.74049
B7	34	18S	3.56086	2.75609
B7	35	18S	3.57026	2.76164
B7	36	18S	3.58515	2.77268
B7	37	18S	3.59556	2.77924
B7	38	18S	3.61167	2.79149
B7	39	18S	3.61489	2.79086
B7	40	18S	3.62615	2.79827
B8	1	18S	0.66414	0.00144389
B8	2	18S	0.668923	0.00158085
B8	3	18S	0.672798	0.000809729
B8	4	18S	0.675866	-0.000767481
B8	5	18S	0.680841	-0.000438476
B8	6	18S	0.685866	-5.95212e-05
B8	7	18S	0.691027	0.000455749
B8	8	18S	0.700209	0.00499141
B8	9	18S	0.716762	0.0168981
B8	10	18S	0.744575	0.0400656
B8	11	18S	0.798674	0.0895183
B8	12	18S	0.892182	0.17838
B8	13	18S	1.0539	0.33545
B8	14	18S	1.30818	0.585088
B8	15	18S	1.65012	0.922383
B8	16	18S	2.02944	1.29706
B8	17	18S	2.34875	1.61172
B8	18	18S	2.61828	1.8766
B8	19	18S	2.83836	2.09204
B8	20	18S	3.02497	2.274
B8	21	18S	3.1696	2.41398
B8	22	18S	3.28581	2.52555
B8	23	18S	3.38423	2.61933
B8	24	18S	3.46641	2.69686
B8	25	18S	3.53506	2.76086
B8	26	18S	3.58224	2.8034
B8	27	18S	3.63752	2.85402
B8	28	18S	3.68355	2.89542
B8	29	18S	3.70977	2.91699
B8	30	18S	3.7458	2.94837
B8	31	18S	3.77573	2.97365
B8	32	18S	3.79771	2.99099
B8	33	18S	3.82004	3.00867
B8	34	18S	3.83338	3.01737
B8	35	18S	3.849	3.02834
B8	36	18S	3.85961	3.03431
B8	37	18S	3.87443	3.04448
B8	38	18S	3.89117	3.05657
B8	39	18S	3.90255	3.06331
B8	40	18S	3.91088	3.06699
B9	1	18S	0.648635	0.00172261
B9	2	18S	0.653426	0.00216109
B9	3	18S	0.65644	0.000823057
B9	4	18S	0.660256	0.000286883
B9	5	18S	0.66258	-0.00174024
B9	6	18S	0.668	-0.000672394
B9	7	18S	0.674327	0.0013027
B9	8	18S	0.682803	0.00542677
B9	9	18S	0.698308	0.0165792
B9	10	18S	0.727274	0.0411934
B9	11	18S	0.780571	0.0901383
B9	12	18S	0.876215	0.181431
B9	13	18S	1.04361	0.344472
B9	14	18S	1.30201	0.598521
B9	15	18S	1.65125	0.943413
B9	16	18S	2.03839	1.3262
B9	17	18S	2.36595	1.64941
B9	18	18S	2.64439	1.9235
B9	19	18S	2.88063	2.15539
B9	20	18S	3.0745	2.3449
B9	21	18S	3.22952	2.49557
B9	22	18S	3.34988	2.61158
B9	23	18S	3.45758	2.71493
B9	24	18S	3.54372	2.79671
B9	25	18S	3.61676	2.8654
B9	26	18S	3.67823	2.92252
B9	27	18S	3.73298	2.97292
B9	28	18S	3.77989	3.01547
B9	29	18S	3.81356	3.04479
B9	30	18S	3.85315	3.08003
B9	31	18S	3.88335	3.10588
B9	32	18S	3.90881	3.12699
B9	33	18S	3.93302	3.14684
B9	34	18S	3.95305	3.16252
B9	35	18S	3.97075	3.17587
B9	36	18S	3.9831	3.18387
B9	37	18S	4.01092	3.20734
B9	38	18S	4.01537	3.20743
B9	39	18S	4.032	3.21971
B9	40	18S	4.04449	3.22785
B10	1	18S	0.622518	0.00094807
B10	2	18S	0.624067	0.00122138
B10	3	18S	0.625285	0.00116413
B10	4	18S	0.625746	0.000349601
B10	5	18S	0.626867	0.000195728
B10	6	18S	0.627768	-0.000179575
B10	7	18S	0.629032	-0.000190277
B10	8	18S	0.631339	0.000841625
B10	9	18S	0.631914	0.000140999
B10	10	18S	0.63238	-0.000668405
B10	11	18S	0.634716	0.000391512
B10	12	18S	0.635061	-0.000538056
B10	13	18S	0.634765	-0.00210962
B10	14	18S	0.636735	-0.00141544
B10	15	18S	0.637411	-0.00201456
B10	16	18S	0.63954	-0.00116052
B10	17	18S	0.642048	7.14764e-05
B10	18	18S	0.648373	0.00512139
B10	19	18S	0.657408	0.0128813
B10	20	18S	0.676641	0.0308383
B10	21	18S	0.711974	0.0648963
B10	22	18S	0.775091	0.126737
B10	23	18S	0.886241	0.236612
B10	24	18S	1.06422	0.413317
B10	25	18S	1.30746	0.655281
B10	26	18S	1.57378	0.920328
B10	27	18S	1.83884	1.18411
B10	28	18S	2.0761	1.42009
B10	29	18S	2.27491	1.61763
B10	30	18S	2.46084	1.80229
B10	31	18S	2.60354	1.94371
B10	32	18S	2.72603	2.06492
B10	33	18S	2.82923	2.16684
B10	34	18S	2.91782	2.25416
B10	35	18S	2.98841	2.32347
B10	36	18S	3.06087	2.39467
B10	37	18S	3.11794	2.45046
B10	38	18S	3.17028	2.50153
B10	39	18S	3.20531	2.53528
B10	40	18S	3.2473	2.57598
B11	1	18S	0.789944	0.0059877
B11	2	18S	0.787274	0.00281612
B11	3	18S	0.785742	0.00078208
B11	4	18S	0.784824	-0.000637789
B11	5	18S	0.786437	0.000473632
B11	6	18S	0.787452	0.000986384
B11	7	18S	0.786706	-0.000260869
B11	8	18S	0.787266	-0.000203199
B11	9	18S	0.788093	0.000121918
B11	10	18S	0.78843	-4.29749e-05
B11	11	18S	0.788185	-0.000789788
B11	12	18S	0.789569	9.24532e-05
B11	13	18S	0.788309	-0.00166847
B11	14	18S	0.789164	-0.00131546
B11	15	18S	0.790407	-0.000574424
B11	16	18S	0.7921	0.000616868
B11	17	18S	0.794405	0.00241964
B11	18	18S	0.797671	0.00518402
B11	19	18S	0.808683	0.0156946
B11	20	18S	0.823658	0.0301677
B11	21	18S	0.858244	0.0642517
B11	22	18S	0.916299	0.121805
B11	23	18S	1.02095	0.225956
B11	24	18S	1.18672	0.39122
B11	25	18S	1.41594	0.619942
B11	26	18S	1.67968	0.88318
B11	27	18S	1.94027	1.14327
B11	28	18S	2.16719	1.36969
B11	29	18S	2.36938	1.57138
B11	30	18S	2.55363	1.75512
B11	31	18S	2.69943	1.90042
B11	32	18S	2.82718	2.02767
B11	33	18S	2.9273	2.12729
B11	34	18S	3.02401	2.22349
B11	35	18S	3.1027	2.30169
B11	36	18S	3.17207	2.37055
B11	37	18S	3.23571	2.43369
B11	38	18S	3.28764	2.48512
B11	39	18S	3.33066	2.52764
B11	40	18S	3.36988	2.56636
B12	1	18S	0.745756	0.0034007
B12	2	18S	0.745464	0.00228955
B12	3	18S	0.745589	0.00159479
B12	4	18S	0.746058	0.0012439
B12	5	18S	0.745909	0.000275735
B12	6	18S	0.747325	0.000872077
B12	7	18S	0.747622	0.000349222
B12	8	18S	0.747265	-0.000827853
B12	9	18S	0.748265	-0.000646837
B12	10	18S	0.748135	-0.00159688
B12	11	18S	0.748697	-0.00185467
B12	12	18S	0.750524	-0.000847176
B12	13	18S	0.750766	-0.00142427
B12	14	18S	0.751853	-0.00115784
B12	15	18S	0.753705	-0.000124657
B12	16	18S	0.753504	-0.0011461
B12	17	18S	0.755602	0.000132413
B12	18	18S	0.761447	0.00515815
B12	19	18S	0.768881	0.0117722
B12	20	18S	0.785416	0.0274877
B12	21	18S	0.822705	0.0639575
B12	22	18S	0.879776	0.120209
B12	23	18S	0.982543	0.222156
B12	24	18S	1.15239	0.391187
B12	25	18S	1.38351	0.621483
B12	26	18S	1.63595	0.873105
B12	27	18S	1.89414	1.13047
B12	28	18S	2.12462	1.36013
B12	29	18S	2.32739	1.56208
B12	30	18S	2.51017	1.74404
B12	31	18S	2.66092	1.89397
B12	32	18S	2.78489	2.01712
B12	33	18S	2.89866	2.13007
B12	34	18S	2.985	2.2156
B12	35	18S	3.0664	2.29618
B12	36	18S	3.13928	2.36824
B12	37	18S	3.20481	2.43294
B12	38	18S	3.25415	2.48147
B12	39	18S	3.30513	2.53163
B12	40	18S	3.34928	2.57496
C1	1	CBF10	0.838043	-0.0281461
C1	2	CBF10	0.845609	-0.021398
C1	3	CBF10	0.860587	-0.00723774
C1	4	CBF10	0.861111	-0.00753169
C1	5	CBF10	0.864717	-0.00474266
C1	6	CBF10	0.869041	-0.00123688
C1	7	CBF10	0.872416	0.00132082
C1	8	CBF10	0.873502	0.00158905
C1	9	CBF10	0.872585	-0.000145311
C1	10	CBF10	0.874752	0.00120385
C1	11	CBF10	0.877721	0.0033547
C1	12	CBF10	0.878952	0.00376848
C1	13	CBF10	0.880862	0.00486045
C1	14	CBF10	0.881307	0.00448799
C1	15	CBF10	0.880983	0.00334693
C1	16	CBF10	0.883243	0.00478878
C1	17	CBF10	0.881088	0.00181637
C1	18	CBF10	0.88405	0.00396018
C1	19	CBF10	0.884266	0.00335908
C1	20	CBF10	0.882237	0.000512192
C1	21	CBF10	0.883827	0.00128444
C1	22	CBF10	0.882587	-0.000772921
C1	23	CBF10	0.883189	-0.000988559
C1	24	CBF10	0.882146	-0.00284935
C1	25	CBF10	0.883609	-0.00220399
C1	26	CBF10	0.88365	-0.00298111
C1	27	CBF10	0.883113	-0.00433567
C1	28	CBF10	0.884666	-0.00360032
C1	29	CBF10	0.887545	-0.00153852
C1	30	CBF10	0.890413	0.000511411
C1	31	CBF10	0.900312	0.00959362
C1	32	CBF10	0.916155	0.024618
C1	33	CBF10	0.948051	0.0556967
C1	34	CBF10	1.01105	0.117877
C1	35	CBF10	1.11884	0.22485
C1	36	CBF10	1.29449	0.399678
C1	37	CBF10	1.53293	0.637309
C1	38	CBF10	1.78836	0.891914
C1	39	CBF10	2.01248	1.11522
C1	40	CBF10	2.20628	1.3082
C2	1	CBF10	0.817823	-0.00883474
C2	2	CBF10	0.819024	-0.00830239
C2	3	CBF10	0.820328	-0.00766596
C2	4	CBF10	0.821872	-0.00679053
C2	5	CBF10	0.823171	-0.00616
C2	6	CBF10	0.828681	-0.00131805
C2	7	CBF10	0.82888	-0.00178747
C2	8	CBF10	0.829624	-0.00171175
C2	9	CBF10	0.833338	0.00133389
C2	10	CBF10	0.834349	0.00167671
C2	11	CBF10	0.835058	0.00171786
C2	12	CBF10	0.836353	0.00234391
C2	13	CBF10	0.835027	0.00035034
C2	14	CBF10	0.838329	0.00298382
C2	15	CBF10	0.839392	0.00337831
C2	16	CBF10	0.840136	0.00345415
C2	17	CBF10	0.840433	0.00308302
C2	18	CBF10	0.841295	0.00327682
C2	19	CBF10	0.842099	0.00341214
C2	20	CBF10	0.842369	0.00301455
C2	21	CBF10	0.842968	0.0029446
C2	22	CBF10	0.842122	0.00143049
C2	23	CBF10	0.843293	0.00193345
C2	24	CBF10	0.844969	0.00294104
C2	25	CBF10	0.844244	0.00154757
C2	26	CBF10	0.845421	0.00205632
C2	27	CBF10	0.844776	0.000743788
C2	28	CBF10	0.84582	0.00111879
C2	29	CBF10	0.844327	-0.00104174
C2	30	CBF10	0.848337	0.00229984
C2	31	CBF10	0.84572	-0.000985241
C2	32	CBF10	0.845663	-0.00171126
C2	33	CBF10	0.84723	-0.000811979
C2	34	CBF10	0.847461	-0.00124898
C2	35	CBF10	0.846899	-0.00247955
C2	36	CBF10	0.846894	-0.00315323
C2	37	CBF10	0.845951	-0.00476456
C2	38	CBF10	0.849412	-0.00197104
C2	39	CBF10	0.848612	-0.00344003
C2	40	CBF10	0.848964	-0.00375567
C3	1	CBF10	0.781248	-0.00285223
C3	2	CBF10	0.78088	-0.00409597
C3	3	CBF10	0.783782	-0.00206999
C3	4	CBF10	0.783818	-0.00291009
C3	5	CBF10	0.786428	-0.00117664
C3	6	CBF10	0.786484	-0.00199677
C3	7	CBF10	0.787261	-0.00209569
C3	8	CBF10	0.789011	-0.00122198
C3	9	CBF10	0.79251	0.00140113
C3	10	CBF10	0.793383	0.00139853
C3	11	CBF10	0.794731	0.00187027
C3	12	CBF10	0.795343	0.00160541
C3	13	CBF10	0.798143	0.00352983
C3	14	CBF10	0.798565	0.00307608
C3	15	CBF10	0.799424	0.00305865
C3	16	CBF10	0.797846	0.000604689
C3	17	CBF10	0.798782	0.000663962
C3	18	CBF10	0.800308	0.00131463
C3	19	CBF10	0.80072	0.000850039
C3	20	CBF10	0.800434	-0.000312226
C3	21	CBF10	0.80246	0.000837871
C3	22	CBF10	0.801539	-0.000958706
C3	23	CBF10	0.803512	0.000137508
C3	24	CBF10	0.803929	-0.000321124
C3	25	CBF10	0.803847	-0.00127972
C3	26	CBF10	0.802757	-0.00324528
C3	27	CBF10	0.804056	-0.00282259
C3	28	CBF10	0.806199	-0.00155573
C3	29	CBF10	0.808626	-4.85271e-06
C3	30	CBF10	0.81113	0.0016228
C3	31	CBF10	0.820699	0.0103159
C3	32	CBF10	0.835001	0.0237414
C3	33	CBF10	0.864466	0.0523308
C3	34	CBF10	0.919784	0.106773
C3	35	CBF10	1.02473	0.210843
C3	36	CBF10	1.20148	0.386719
C3	37	CBF10	1.4723	0.656656
C3	38	CBF10	1.82595	1.00943
C3	39	CBF10	2.17152	1.35413
C3	40	CBF10	2.45805	1.63978
C4	1	CBF10	0.71788	-0.00968205
C4	2	CBF10	0.721428	-0.00674799
C4	3	CBF10	0.72187	-0.0069194
C4	4	CBF10	0.724077	-0.00532597
C4	5	CBF10	0.726036	-0.00398128
C4	6	CBF10	0.727101	-0.0035297
C4	7	CBF10	0.729581	-0.00166364
C4	8	CBF10	0.730448	-0.00141012
C4	9	CBF10	0.732704	0.000231524
C4	10	CBF10	0.733587	0.000500952
C4	11	CBF10	0.73347	-0.000229428
C4	12	CBF10	0.734953	0.000639326
C4	13	CBF10	0.736852	0.00192466
C4	14	CBF10	0.736827	0.00128583
C4	15	CBF10	0.73955	0.00339525
C4	16	CBF10	0.742162	0.00539322
C4	17	CBF10	0.739133	0.00175026
C4	18	CBF10	0.741208	0.00321142
C4	19	CBF10	0.742597	0.00398683
C4	20	CBF10	0.742804	0.00358011
C4	21	CBF10	0.743128	0.00329062
C4	22	CBF10	0.743608	0.00315694
C4	23	CBF10	0.743984	0.00291842
C4	24	CBF10	0.743865	0.00218601
C4	25	CBF10	0.743927	0.00163415
C4	26	CBF10	0.743347	0.000440345
C4	27	CBF10	0.745122	0.00160217
C4	28	CBF10	0.744473	0.000338631
C4	29	CBF10	0.74559	0.000842366
C4	30	CBF10	0.746679	0.00131737
C4	31	CBF10	0.745813	-0.000162657
C4	32	CBF10	0.745817	-0.000772575
C4	33	CBF10	0.745807	-0.00139614
C4	34	CBF10	0.74553	-0.00228728
C4	35	CBF10	0.746381	-0.00204986
C4	36	CBF10	0.74655	-0.00249431
C4	37	CBF10	0.746037	-0.00362124
C4	38	CBF10	0.746071	-0.00420154
C4	39	CBF10	0.747305	-0.00358128
C4	40	CBF10	0.746581	-0.00491861
C5	1	CBF10	0.859508	-0.000894152
C5	2	CBF10	0.855249	-0.00565419
C5	3	CBF10	0.856134	-0.00526968
C5	4	CBF10	0.855166	-0.00673864
C5	5	CBF10	0.855031	-0.00737463
C5	6	CBF10	0.85782	-0.00508725
C5	7	CBF10	0.860017	-0.00339085
C5	8	CBF10	0.861166	-0.00274301
C5	9	CBF10	0.863205	-0.00120504
C5	10	CBF10	0.864011	-0.000899628
C5	11	CBF10	0.867255	0.00184301
C5	12	CBF10	0.867595	0.00168178
C5	13	CBF10	0.869968	0.00355455
C5	14	CBF10	0.870276	0.00336071
C5	15	CBF10	0.871527	0.00411149
C5	16	CBF10	0.871538	0.00362099
C5	17	CBF10	0.873331	0.00491339
C5	18	CBF10	0.873553	0.00463402
C5	19	CBF10	0.87239	0.00297039
C5	20	CBF10	0.873667	0.00374608
C5	21	CBF10	0.875469	0.0050476
C5	22	CBF10	0.874043	0.00312064
C5	23	CBF10	0.875137	0.00371322
C5	24	CBF10	0.875943	0.00401809
C5	25	CBF10	0.875829	0.0034038
C5	26	CBF10	0.874351	0.00142474
C5	27	CBF10	0.874676	0.00124849
C5	28	CBF10	0.874779	0.000849905
C5	29	CBF10	0.87535	0.000920232
C5	30	CBF10	0.876536	0.0016058
C5	31	CBF10	0.874725	-0.000706271
C5	32	CBF10	0.875417	-0.000515839
C5	33	CBF10	0.874557	-0.00187626
C5	34	CBF10	0.875027	-0.00190768
C5	35	CBF10	0.873856	-0.00357942
C5	36	CBF10	0.874887	-0.00304966
C5	37	CBF10	0.873396	-0.00504177
C5	38	CBF10	0.873354	-0.00558483
C5	39	CBF10	0.874621	-0.0048185
C5	40	CBF10	0.873679	-0.00626153
C6	1	CBF10	0.728311	0.00118875
C6	2	CBF10	0.726531	-0.00128807
C6	3	CBF10	0.72686	-0.00165603
C6	4	CBF10	0.726608	-0.0026059
C6	5	CBF10	0.728052	-0.00185853
C6	6	CBF10	0.730059	-0.00054802
C6	7	CBF10	0.731721	0.000416548
C6	8	CBF10	0.731995	-6.60031e-06
C6	9	CBF10	0.732794	9.52494e-05
C6	10	CBF10	0.734137	0.000740991
C6	11	CBF10	0.736145	0.00205216
C6	12	CBF10	0.736677	0.00188722
C6	13	CBF10	0.735541	5.44213e-05
C6	14	CBF10	0.736786	0.000602352
C6	15	CBF10	0.739157	0.00227639
C6	16	CBF10	0.739	0.00142254
C6	17	CBF10	0.739343	0.00106824
C6	18	CBF10	0.741109	0.00213741
C6	19	CBF10	0.739799	0.000130568
C6	20	CBF10	0.741527	0.00116106
C6	21	CBF10	0.740965	-9.82837e-05
C6	22	CBF10	0.741484	-0.000276159
C6	23	CBF10	0.74202	-0.000436867
C6	24	CBF10	0.742262	-0.000892142
C6	25	CBF10	0.741505	-0.00234609
C6	26	CBF10	0.74188	-0.00266821
C6	27	CBF10	0.743498	-0.00174692
C6	28	CBF10	0.743166	-0.00277607
C6	29	CBF10	0.746998	0.000359244
C6	30	CBF10	0.750848	0.00351142
C6	31	CBF10	0.756293	0.00825957
C6	32	CBF10	0.770048	0.0213181
C6	33	CBF10	0.796879	0.0474519
C6	34	CBF10	0.847012	0.0968872
C6	35	CBF10	0.940284	0.189463
C6	36	CBF10	1.10195	0.350435
C6	37	CBF10	1.35819	0.60597
C6	38	CBF10	1.70115	0.948241
C6	39	CBF10	2.06747	1.31386
C6	40	CBF10	2.37327	1.61896
C7	1	18S	0.622922	-0.00204762
C7	2	18S	0.627899	-0.000214721
C7	3	18S	0.631728	0.000469536
C7	4	18S	0.634506	0.000102605
C7	5	18S	0.637256	-0.000292757
C7	6	18S	0.640702	8.89812e-06
C7	7	18S	0.643361	-0.000476944
C7	8	18S	0.646398	-0.000585011
C7	9	18S	0.650254	0.000126664
C7	10	18S	0.653919	0.000647008
C7	11	18S	0.662747	0.00632995
C7	12	18S	0.67491	0.0153475
C7	13	18S	0.695849	0.0331417
C7	14	18S	0.735024	0.0691728
C7	15	18S	0.806593	0.137596
C7	16	18S	0.92768	0.255539
C7	17	18S	1.11747	0.442182
C7	18	18S	1.38106	0.702627
C7	19	18S	1.68522	1.00365
C7	20	18S	1.96694	1.28222
C7	21	18S	2.20567	1.5178
C7	22	18S	2.42747	1.73646
C7	23	18S	2.60775	1.9136
C7	24	18S	2.75816	2.06086
C7	25	18S	2.88078	2.18033
C7	26	18S	2.97686	2.27327
C7	27	18S	3.06743	2.36069
C7	28	18S	3.13688	2.427
C7	29	18S	3.19472	2.48169
C7	30	18S	3.25065	2.53448
C7	31	18S	3.28901	2.5697
C7	32	18S	3.32793	2.60547
C7	33	18S	3.36126	2.63566
C7	34	18S	3.39575	2.667
C7	35	18S	3.42639	2.6945
C7	36	18S	3.44503	2.71
C7	37	18S	3.46742	2.72924
C7	38	18S	3.48337	2.74204
C7	39	18S	3.50383	2.75936
C7	40	18S	3.51828	2.77066
C8	1	18S	0.623973	0.00128882
C8	2	18S	0.626352	0.000715828
C8	3	18S	0.629745	0.00115766
C8	4	18S	0.632318	0.000777904
C8	5	18S	0.634245	-0.000246538
C8	6	18S	0.636149	-0.00129452
C8	7	18S	0.638852	-0.00154404
C8	8	18S	0.642142	-0.00120586
C8	9	18S	0.646983	0.000683587
C8	10	18S	0.650924	0.00167182
C8	11	18S	0.658123	0.00591923
C8	12	18S	0.6708	0.0156447
C8	13	18S	0.694421	0.0363133
C8	14	18S	0.733624	0.072564
C8	15	18S	0.804119	0.140108
C8	16	18S	0.929793	0.262829
C8	17	18S	1.12609	0.456178
C8	18	18S	1.39995	0.727079
C8	19	18S	1.71079	1.03497
C8	20	18S	2.01703	1.33826
C8	21	18S	2.28142	1.59969
C8	22	18S	2.52002	1.83534
C8	23	18S	2.71833	2.0307
C8	24	18S	2.89474	2.20416
C8	25	18S	3.02743	2.3339
C8	26	18S	3.14	2.44351
C8	27	18S	3.24109	2.54166
C8	28	18S	3.32187	2.61948
C8	29	18S	3.38802	2.68268
C8	30	18S	3.45232	2.74403
C8	31	18S	3.49993	2.78869
C8	32	18S	3.54442	2.83022
C8	33	18S	3.58471	2.86756
C8	34	18S	3.62277	2.90267
C8	35	18S	3.65891	2.93585
C8	36	18S	3.69459	2.96858
C8	37	18S	3.71095	2.98199
C8	38	18S	3.73819	3.00628
C8	39	18S	3.75307	3.01821
C8	40	18S	3.77281	3.035
C9	1	18S	0.639719	-0.000403301
C9	2	18S	0.643296	0.000433507
C9	3	18S	0.646944	0.00134041
C9	4	18S	0.648475	0.000131168
C9	5	18S	0.650604	-0.000480418
C9	6	18S	0.653329	-0.000496434
C9	7	18S	0.65521	-0.00135562
C9	8	18S	0.658236	-0.00107021
C9	9	18S	0.662472	0.000425227
C9	10	18S	0.666293	0.00150588
C9	11	18S	0.674498	0.00697069
C9	12	18S	0.685582	0.0153134
C9	13	18S	0.707361	0.0343519
C9	14	18S	0.744601	0.0688521
C9	15	18S	0.810345	0.131855
C9	16	18S	0.926611	0.24538
C9	17	18S	1.10893	0.424962
C9	18	18S	1.37058	0.68387
C9	19	18S	1.67043	0.980977
C9	20	18S	1.97754	1.28535
C9	21	18S	2.24912	1.55419
C9	22	18S	2.50496	1.80728
C9	23	18S	2.70781	2.0074
C9	24	18S	2.89235	2.1892
C9	25	18S	3.04131	2.33541
C9	26	18S	3.1696	2.46096
C9	27	18S	3.27607	2.5647
C9	28	18S	3.36192	2.6478
C9	29	18S	3.43896	2.7221
C9	30	18S	3.5074	2.7878
C9	31	18S	3.55714	2.8348
C9	32	18S	3.6125	2.88742
C9	33	18S	3.66043	2.93261
C9	34	18S	3.69466	2.9641
C9	35	18S	3.72854	2.99524
C9	36	18S	3.76204	3.026
C9	37	18S	3.79447	3.05569
C9	38	18S	3.81757	3.07605
C9	39	18S	3.84146	3.09719
C9	40	18S	3.86955	3.12255
C10	1	18S	0.587448	0.00166399
C10	2	18S	0.589628	0.00177969
C10	3	18S	0.591176	0.00126383
C10	4	18S	0.592658	0.000680904
C10	5	18S	0.594289	0.00024753
C10	6	18S	0.597355	0.00124938
C10	7	18S	0.597421	-0.000748799
C10	8	18S	0.599271	-0.000963245
C10	9	18S	0.601457	-0.000840925
C10	10	18S	0.60307	-0.00129224
C10	11	18S	0.605277	-0.00114995
C10	12	18S	0.60709	-0.00140124
C10	13	18S	0.608971	-0.00158481
C10	14	18S	0.612457	-0.000162569
C10	15	18S	0.619386	0.00470213
C10	16	18S	0.628591	0.0118431
C10	17	18S	0.647723	0.0289104
C10	18	18S	0.682914	0.0620368
C10	19	18S	0.743682	0.120741
C10	20	18S	0.847706	0.222701
C10	21	18S	1.00393	0.376861
C10	22	18S	1.22077	0.591638
C10	23	18S	1.45941	0.828215
C10	24	18S	1.71443	1.08117
C10	25	18S	1.94471	1.30938
C10	26	18S	2.15929	1.52189
C10	27	18S	2.34976	1.7103
C10	28	18S	2.50455	1.86303
C10	29	18S	2.63684	1.99326
C10	30	18S	2.75485	2.10921
C10	31	18S	2.84934	2.20163
C10	32	18S	2.9396	2.28982
C10	33	18S	3.00886	2.35702
C10	34	18S	3.07551	2.42161
C10	35	18S	3.13247	2.4765
C10	36	18S	3.18361	2.52558
C10	37	18S	3.22447	2.56438
C10	38	18S	3.26828	2.60611
C10	39	18S	3.30416	2.63994
C10	40	18S	3.33972	2.67343
C11	1	18S	0.7423	0.00397576
C11	2	18S	0.742981	0.00354151
C11	3	18S	0.742	0.00144494
C11	4	18S	0.742847	0.00117633
C11	5	18S	0.742208	-0.0005784
C11	6	18S	0.744604	0.000701699
C11	7	18S	0.744317	-0.000701127
C11	8	18S	0.744667	-0.00146606
C11	9	18S	0.747227	-2.15173e-05
C11	10	18S	0.747769	-0.000595958
C11	11	18S	0.748868	-0.000611844
C11	12	18S	0.74865	-0.00194535
C11	13	18S	0.750049	-0.00166268
C11	14	18S	0.752606	-0.000221108
C11	15	18S	0.758424	0.00448107
C11	16	18S	0.765783	0.0107252
C11	17	18S	0.782171	0.0259973
C11	18	18S	0.813002	0.0557126
C11	19	18S	0.867358	0.108953
C11	20	18S	0.959731	0.200211
C11	21	18S	1.10189	0.341249
C11	22	18S	1.29231	0.530555
C11	23	18S	1.51341	0.750539
C11	24	18S	1.73259	0.968602
C11	25	18S	1.94051	1.17541
C11	26	18S	2.13028	1.36407
C11	27	18S	2.30699	1.53966
C11	28	18S	2.44909	1.68065
C11	29	18S	2.56751	1.79795
C11	30	18S	2.676	1.90533
C11	31	18S	2.76318	1.99139
C11	32	18S	2.85047	2.07756
C11	33	18S	2.91426	2.14024
C11	34	18S	2.97146	2.19632
C11	35	18S	3.02099	2.24473
C11	36	18S	3.07785	2.30048
C11	37	18S	3.11916	2.34067
C11	38	18S	3.16104	2.38144
C11	39	18S	3.19032	2.4096
C11	40	18S	3.22558	2.44374
C12	1	18S	0.722082	0.00162005
C12	2	18S	0.721932	0.000677595
C12	3	18S	0.722066	1.844e-05
C12	4	18S	0.723534	0.000693774
C12	5	18S	0.724174	0.000540961
C12	6	18S	0.724575	0.000148835
C12	7	18S	0.724393	-0.000825628
C12	8	18S	0.725686	-0.000325532
C12	9	18S	0.726444	-0.000359911
C12	10	18S	0.727489	-0.000107413
C12	11	18S	0.72727	-0.00111984
C12	12	18S	0.729097	-8.55711e-05
C12	13	18S	0.730267	0.000292574
C12	14	18S	0.731897	0.00112932
C12	15	18S	0.736522	0.00496143
C12	16	18S	0.748074	0.015721
C12	17	18S	0.764621	0.0314753
C12	18	18S	0.796361	0.0624223
C12	19	18S	0.852457	0.117725
C12	20	18S	0.948036	0.212512
C12	21	18S	1.09699	0.360677
C12	22	18S	1.30018	0.56307
C12	23	18S	1.52653	0.788627
C12	24	18S	1.75956	1.02086
C12	25	18S	1.98644	1.24695
C12	26	18S	2.18853	1.44825
C12	27	18S	2.36839	1.62732
C12	28	18S	2.52698	1.78512
C12	29	18S	2.65691	1.91426
C12	30	18S	2.76554	2.02209
C12	31	18S	2.86806	2.12381
C12	32	18S	2.94853	2.2035
C12	33	18S	3.02442	2.27859
C12	34	18S	3.08443	2.3378
C12	35	18S	3.14336	2.39594
C12	36	18S	3.19897	2.45076
C12	37	18S	3.24225	2.49325
C12	38	18S	3.28808	2.53828
C12	39	18S	3.31989	2.56931
C12	40	18S	3.35538	2.604
D1	1	CBF10	0.794638	-0.0140564
D1	2	CBF10	0.798727	-0.0102219
D1	3	CBF10	0.801097	-0.0081069
D1	4	CBF10	0.802555	-0.00690396
D1	5	CBF10	0.805692	-0.004021
D1	6	CBF10	0.805727	-0.00424142
D1	7	CBF10	0.808947	-0.00127555
D1	8	CBF10	0.808315	-0.00216324
D1	9	CBF10	0.812486	0.00175356
D1	10	CBF10	0.813783	0.00279551
D1	11	CBF10	0.811095	-0.000147115
D1	12	CBF10	0.814457	0.00295978
D1	13	CBF10	0.814076	0.00232421
D1	14	CBF10	0.815458	0.00345193
D1	15	CBF10	0.815565	0.00330352
D1	16	CBF10	0.81555	0.00303452
D1	17	CBF10	0.814676	0.00190549
D1	18	CBF10	0.816919	0.00389348
D1	19	CBF10	0.816924	0.00364356
D1	20	CBF10	0.816073	0.00253849
D1	21	CBF10	0.817464	0.0036742
D1	22	CBF10	0.817585	0.00354033
D1	23	CBF10	0.816496	0.00219702
D1	24	CBF10	0.816201	0.00164693
D1	25	CBF10	0.815161	0.000352671
D1	26	CBF10	0.816484	0.00142091
D1	27	CBF10	0.816207	0.000888994
D1	28	CBF10	0.815577	3.98464e-06
D1	29	CBF10	0.816117	0.000289849
D1	30	CBF10	0.815542	-0.000540444
D1	31	CBF10	0.815594	-0.000743219
D1	32	CBF10	0.815199	-0.00139315
D1	33	CBF10	0.815355	-0.00149161
D1	34	CBF10	0.816875	-0.000225791
D1	35	CBF10	0.814791	-0.00256521
D1	36	CBF10	0.815825	-0.00178547
D1	37	CBF10	0.815141	-0.0027246
D1	38	CBF10	0.814612	-0.0035081
D1	39	CBF10	0.814593	-0.00378216
D1	40	CBF10	0.814545	-0.00408453
D2	1	CBF10	0.812233	-0.00804598
D2	2	CBF10	0.813052	-0.00738711
D2	3	CBF10	0.81382	-0.00677938
D2	4	CBF10	0.815167	-0.00559277
D2	5	CBF10	0.816412	-0.00450802
D2	6	CBF10	0.818473	-0.00260717
D2	7	CBF10	0.820832	-0.000408827
D2	8	CBF10	0.820633	-0.000768003
D2	9	CBF10	0.822934	0.00137258
D2	10	CBF10	0.821974	0.000252789
D2	11	CBF10	0.824019	0.00213677
D2	12	CBF10	0.825017	0.002975
D2	13	CBF10	0.825353	0.00315024
D2	14	CBF10	0.823582	0.00121976
D2	15	CBF10	0.823362	0.000839426
D2	16	CBF10	0.82423	0.00154682
D2	17	CBF10	0.824267	0.00142367
D2	18	CBF10	0.825381	0.00237675
D2	19	CBF10	0.825271	0.00210728
D2	20	CBF10	0.824978	0.00165346
D2	21	CBF10	0.826624	0.00313934
D2	22	CBF10	0.826702	0.00305679
D2	23	CBF10	0.825666	0.00186094
D2	24	CBF10	0.826988	0.00302216
D2	25	CBF10	0.826605	0.00247976
D2	26	CBF10	0.825591	0.00130549
D2	27	CBF10	0.825546	0.0010998
D2	28	CBF10	0.825219	0.000612891
D2	29	CBF10	0.823764	-0.00100287
D2	30	CBF10	0.825035	0.000107506
D2	31	CBF10	0.823509	-0.00157787
D2	32	CBF10	0.825704	0.000456316
D2	33	CBF10	0.82428	-0.00112762
D2	34	CBF10	0.824443	-0.00112499
D2	35	CBF10	0.824704	-0.00102408
D2	36	CBF10	0.823761	-0.0021273
D2	37	CBF10	0.822837	-0.00321169
D2	38	CBF10	0.823207	-0.00300223
D2	39	CBF10	0.823037	-0.00333274
D2	40	CBF10	0.821653	-0.00487686
D3	1	CBF10	0.79833	-0.00925904
D3	2	CBF10	0.801909	-0.00621683
D3	3	CBF10	0.802399	-0.00626429
D3	4	CBF10	0.803024	-0.00617574
D3	5	CBF10	0.803961	-0.00577491
D3	6	CBF10	0.806093	-0.00418002
D3	7	CBF10	0.808354	-0.00245633
D3	8	CBF10	0.808966	-0.00238083
D3	9	CBF10	0.810779	-0.00110453
D3	10	CBF10	0.813731	0.00131046
D3	11	CBF10	0.814544	0.00158683
D3	12	CBF10	0.815384	0.00189014
D3	13	CBF10	0.815616	0.00158572
D3	14	CBF10	0.817657	0.00308971
D3	15	CBF10	0.816998	0.00189415
D3	16	CBF10	0.818638	0.00299777
D3	17	CBF10	0.820387	0.00421005
D3	18	CBF10	0.821317	0.00460277
D3	19	CBF10	0.821066	0.0038155
D3	20	CBF10	0.821457	0.00366921
D3	21	CBF10	0.821911	0.00358623
D3	22	CBF10	0.822796	0.00393442
D3	23	CBF10	0.82191	0.00251212
D3	24	CBF10	0.823229	0.00329394
D3	25	CBF10	0.823219	0.00274723
D3	26	CBF10	0.822159	0.00115053
D3	27	CBF10	0.824309	0.00276437
D3	28	CBF10	0.823438	0.00135667
D3	29	CBF10	0.822794	0.000175469
D3	30	CBF10	0.822082	-0.0010732
D3	31	CBF10	0.822643	-0.00104926
D3	32	CBF10	0.824095	-0.000133449
D3	33	CBF10	0.823131	-0.00163413
D3	34	CBF10	0.822496	-0.00280669
D3	35	CBF10	0.824394	-0.0014451
D3	36	CBF10	0.82526	-0.00111568
D3	37	CBF10	0.822299	-0.00461371
D3	38	CBF10	0.824165	-0.003284
D3	39	CBF10	0.821305	-0.00668143
D3	40	CBF10	0.821675	-0.00684774
D4	1	CBF10	0.780157	-0.00589287
D4	2	CBF10	0.782874	-0.00374895
D4	3	CBF10	0.783829	-0.00336778
D4	4	CBF10	0.78568	-0.00209033
D4	5	CBF10	0.785748	-0.00259596
D4	6	CBF10	0.788337	-0.000580729
D4	7	CBF10	0.789432	-5.97856e-05
D4	8	CBF10	0.789606	-0.000459436
D4	9	CBF10	0.79046	-0.000178937
D4	10	CBF10	0.792865	0.00165164
D4	11	CBF10	0.794315	0.00252801
D4	12	CBF10	0.795362	0.00300222
D4	13	CBF10	0.793872	0.000937633
D4	14	CBF10	0.795271	0.0017631
D4	15	CBF10	0.796819	0.00273733
D4	16	CBF10	0.795453	0.000797679
D4	17	CBF10	0.796631	0.00140219
D4	18	CBF10	0.796729	0.000926602
D4	19	CBF10	0.796105	-0.000271512
D4	20	CBF10	0.797617	0.000667379
D4	21	CBF10	0.797949	0.000425622
D4	22	CBF10	0.797897	-0.000199989
D4	23	CBF10	0.798541	-0.000129537
D4	24	CBF10	0.799284	3.95005e-05
D4	25	CBF10	0.798137	-0.00168105
D4	26	CBF10	0.798885	-0.00150665
D4	27	CBF10	0.799093	-0.00187304
D4	28	CBF10	0.799235	-0.00230404
D4	29	CBF10	0.80005	-0.00206282
D4	30	CBF10	0.805169	0.00248269
D4	31	CBF10	0.808539	0.00527898
D4	32	CBF10	0.821649	0.0178147
D4	33	CBF10	0.844129	0.0397211
D4	34	CBF10	0.886725	0.0817437
D4	35	CBF10	0.965716	0.160161
D4	36	CBF10	1.10238	0.29625
D4	37	CBF10	1.32082	0.51412
D4	38	CBF10	1.5985	0.791229
D4	39	CBF10	1.8986	1.09075
D4	40	CBF10	2.16094	1.35252
D5	1	CBF10	0.799213	-0.00469741
D5	2	CBF10	0.798748	-0.00547881
D5	3	CBF10	0.799608	-0.00493651
D5	4	CBF10	0.799027	-0.00583486
D5	5	CBF10	0.801681	-0.00349828
D5	6	CBF10	0.802254	-0.00324304
D5	7	CBF10	0.803797	-0.00201653
D5	8	CBF10	0.805505	-0.000625761
D5	9	CBF10	0.805463	-0.00098528
D5	10	CBF10	0.807935	0.00116939
D5	11	CBF10	0.808152	0.00106837
D5	12	CBF10	0.807412	1.17786e-05
D5	13	CBF10	0.810575	0.0028572
D5	14	CBF10	0.809611	0.00157626
D5	15	CBF10	0.810801	0.00244883
D5	16	CBF10	0.813148	0.00447796
D5	17	CBF10	0.812726	0.00373894
D5	18	CBF10	0.812365	0.00306018
D5	19	CBF10	0.81201	0.00238786
D5	20	CBF10	0.812894	0.00295519
D5	21	CBF10	0.812318	0.0020612
D5	22	CBF10	0.813767	0.00319382
D5	23	CBF10	0.812742	0.00185148
D5	24	CBF10	0.814419	0.00321085
D5	25	CBF10	0.813551	0.00202568
D5	26	CBF10	0.811763	-8.01908e-05
D5	27	CBF10	0.812594	0.000433737
D5	28	CBF10	0.813318	0.000840377
D5	29	CBF10	0.812028	-0.000767202
D5	30	CBF10	0.8124	-0.000712409
D5	31	CBF10	0.811817	-0.00161218
D5	32	CBF10	0.811969	-0.00177745
D5	33	CBF10	0.813174	-0.00088986
D5	34	CBF10	0.812251	-0.00213057
D5	35	CBF10	0.813232	-0.00146692
D5	36	CBF10	0.811657	-0.00335947
D5	37	CBF10	0.812827	-0.00250675
D5	38	CBF10	0.812429	-0.00322157
D5	39	CBF10	0.816264	0.000295719
D5	40	CBF10	0.822205	0.00591932
D6	1	CBF10	0.785031	-0.0060788
D6	2	CBF10	0.786265	-0.00535209
D6	3	CBF10	0.787322	-0.00480138
D6	4	CBF10	0.790036	-0.00259474
D6	5	CBF10	0.791005	-0.00213344
D6	6	CBF10	0.792414	-0.00123131
D6	7	CBF10	0.793012	-0.0011401
D6	8	CBF10	0.794465	-0.00019499
D6	9	CBF10	0.795239	7.22348e-05
D6	10	CBF10	0.796456	0.000781845
D6	11	CBF10	0.797578	0.00139728
D6	12	CBF10	0.799295	0.00260644
D6	13	CBF10	0.799378	0.0021826
D6	14	CBF10	0.799732	0.00202902
D6	15	CBF10	0.801196	0.00298587
D6	16	CBF10	0.802152	0.00343513
D6	17	CBF10	0.801208	0.00198359
D6	18	CBF10	0.802841	0.00310996
D6	19	CBF10	0.802426	0.00218712
D6	20	CBF10	0.802556	0.00181031
D6	21	CBF10	0.801678	0.000425715
D6	22	CBF10	0.802214	0.00045458
D6	23	CBF10	0.801259	-0.00100828
D6	24	CBF10	0.800608	-0.00216608
D6	25	CBF10	0.801583	-0.00169829
D6	26	CBF10	0.801453	-0.00233521
D6	27	CBF10	0.802669	-0.00162697
D6	28	CBF10	0.800931	-0.00387214
D6	29	CBF10	0.802638	-0.00267204
D6	30	CBF10	0.805712	-0.000104912
D6	31	CBF10	0.808442	0.00211818
D6	32	CBF10	0.817714	0.0108823
D6	33	CBF10	0.832329	0.0249899
D6	34	CBF10	0.862852	0.0550061
D6	35	CBF10	0.921835	0.113482
D6	36	CBF10	1.02643	0.217567
D6	37	CBF10	1.20919	0.399822
D6	38	CBF10	1.49425	0.684372
D6	39	CBF10	1.85343	1.04305
D6	40	CBF10	2.23314	1.42225
D7	1	18S	0.662813	-0.00150849
D7	2	18S	0.668588	0.00156938
D7	3	18S	0.670679	0.000964452
D7	4	18S	0.672137	-0.000274545
D7	5	18S	0.675248	0.000140069
D7	6	18S	0.678599	0.000793757
D7	7	18S	0.680513	1.09142e-05
D7	8	18S	0.682263	-0.000935007
D7	9	18S	0.684674	-0.0012214
D7	10	18S	0.687968	-0.000623743
D7	11	18S	0.690288	-0.0010005
D7	12	18S	0.693502	-0.000483067
D7	13	18S	0.699311	0.00262907
D7	14	18S	0.709114	0.00973544
D7	15	18S	0.724619	0.0225436
D7	16	18S	0.756099	0.0513267
D7	17	18S	0.8102	0.102731
D7	18	18S	0.909866	0.199701
D7	19	18S	1.06803	0.355168
D7	20	18S	1.29383	0.578272
D7	21	18S	1.55716	0.83891
D7	22	18S	1.8207	1.09974
D7	23	18S	2.04489	1.32125
D7	24	18S	2.25505	1.52871
D7	25	18S	2.42475	1.69571
D7	26	18S	2.56856	1.83683
D7	27	18S	2.69341	1.95897
D7	28	18S	2.7927	2.05557
D7	29	18S	2.87376	2.13393
D7	30	18S	2.94746	2.20493
D7	31	18S	3.0069	2.26168
D7	32	18S	3.05617	2.30825
D7	33	18S	3.1039	2.35329
D7	34	18S	3.14324	2.38993
D7	35	18S	3.17891	2.42291
D7	36	18S	3.20828	2.44957
D7	37	18S	3.23395	2.47254
D7	38	18S	3.26677	2.50267
D7	39	18S	3.29229	2.5255
D7	40	18S	3.31012	2.54063
D8	1	18S	0.611745	-0.000871788
D8	2	18S	0.614442	0.00055965
D8	3	18S	0.615395	0.000247473
D8	4	18S	0.617816	0.0014039
D8	5	18S	0.618627	0.000949979
D8	6	18S	0.618876	-6.64267e-05
D8	7	18S	0.619599	-0.000607902
D8	8	18S	0.620318	-0.00115397
D8	9	18S	0.621467	-0.00126987
D8	10	18S	0.622511	-0.00149168
D8	11	18S	0.623469	-0.00179849
D8	12	18S	0.626857	0.000324119
D8	13	18S	0.63126	0.00346287
D8	14	18S	0.641144	0.012082
D8	15	18S	0.654585	0.024258
D8	16	18S	0.682272	0.0506793
D8	17	18S	0.733427	0.10057
D8	18	18S	0.824269	0.190146
D8	19	18S	0.96836	0.332973
D8	20	18S	1.1755	0.538845
D8	21	18S	1.40592	0.768
D8	22	18S	1.62304	0.983862
D8	23	18S	1.81096	1.17051
D8	24	18S	1.9767	1.33498
D8	25	18S	2.11596	1.47299
D8	26	18S	2.22135	1.57711
D8	27	18S	2.31529	1.66978
D8	28	18S	2.39121	1.74443
D8	29	18S	2.44705	1.79901
D8	30	18S	2.50595	1.85665
D8	31	18S	2.54417	1.8936
D8	32	18S	2.58233	1.9305
D8	33	18S	2.61544	1.96234
D8	34	18S	2.64424	1.98988
D8	35	18S	2.66652	2.01089
D8	36	18S	2.68767	2.03078
D8	37	18S	2.70751	2.04935
D8	38	18S	2.72906	2.06964
D8	39	18S	2.74162	2.08094
D8	40	18S	2.75472	2.09276
D9	1	18S	0.602957	0.000415613
D9	2	18S	0.605748	0.000809209
D9	3	18S	0.607134	-0.000201839
D9	4	18S	0.610288	0.000556001
D9	5	18S	0.613276	0.00114701
D9	6	18S	0.614658	0.000132921
D9	7	18S	0.615714	-0.00120846
D9	8	18S	0.619185	-0.000133877
D9	9	18S	0.620943	-0.000772872
D9	10	18S	0.622869	-0.00124378
D9	11	18S	0.626435	-7.40738e-05
D9	12	18S	0.630705	0.00179897
D9	13	18S	0.636185	0.00488199
D9	14	18S	0.64709	0.0133908
D9	15	18S	0.664248	0.0281518
D9	16	18S	0.698138	0.0596454
D9	17	18S	0.757317	0.116427
D9	18	18S	0.862372	0.219086
D9	19	18S	1.03359	0.387904
D9	20	18S	1.2725	0.624423
D9	21	18S	1.55173	0.901249
D9	22	18S	1.8301	1.17723
D9	23	18S	2.06541	1.41014
D9	24	18S	2.27955	1.62189
D9	25	18S	2.4579	1.79784
D9	26	18S	2.60433	1.94186
D9	27	18S	2.72899	2.06414
D9	28	18S	2.82293	2.15568
D9	29	18S	2.90792	2.23827
D9	30	18S	2.9855	2.31346
D9	31	18S	3.03292	2.35848
D9	32	18S	3.0964	2.41956
D9	33	18S	3.13203	2.4528
D9	34	18S	3.1701	2.48847
D9	35	18S	3.21118	2.52715
D9	36	18S	3.23802	2.5516
D9	37	18S	3.26752	2.57869
D9	38	18S	3.29674	2.60552
D9	39	18S	3.31931	2.62569
D9	40	18S	3.34242	2.6464
D10	1	18S	0.646959	0.0030268
D10	2	18S	0.647341	0.00182291
D10	3	18S	0.647873	0.000768575
D10	4	18S	0.649113	0.000422818
D10	5	18S	0.650769	0.000492028
D10	6	18S	0.651961	9.76934e-05
D10	7	18S	0.653649	0.000199508
D10	8	18S	0.654913	-0.000122348
D10	9	18S	0.656934	0.000312239
D10	10	18S	0.655783	-0.00242468
D10	11	18S	0.656775	-0.00301893
D10	12	18S	0.660145	-0.00123513
D10	13	18S	0.664076	0.00110979
D10	14	18S	0.667951	0.00339844
D10	15	18S	0.675759	0.00961992
D10	16	18S	0.688103	0.0203778
D10	17	18S	0.713964	0.0446529
D10	18	18S	0.76234	0.0914429
D10	19	18S	0.849261	0.176778
D10	20	18S	0.990264	0.316194
D10	21	18S	1.20401	0.528351
D10	22	18S	1.46514	0.787897
D10	23	18S	1.73045	1.05162
D10	24	18S	1.96441	1.28399
D10	25	18S	2.17233	1.49033
D10	26	18S	2.34878	1.66519
D10	27	18S	2.50803	1.82285
D10	28	18S	2.63263	1.94587
D10	29	18S	2.73108	2.04273
D10	30	18S	2.82118	2.13125
D10	31	18S	2.89386	2.20235
D10	32	18S	2.95342	2.26031
D10	33	18S	3.00835	2.31366
D10	34	18S	3.06194	2.36567
D10	35	18S	3.09591	2.39805
D10	36	18S	3.13771	2.43827
D10	37	18S	3.16944	2.46841
D10	38	18S	3.1994	2.49678
D10	39	18S	3.22428	2.52007
D10	40	18S	3.24555	2.53976
D11	1	18S	0.799413	0.00151552
D11	2	18S	0.799214	0.000520918
D11	3	18S	0.80001	0.000520759
D11	4	18S	0.799561	-0.000724302
D11	5	18S	0.801331	0.000250552
D11	6	18S	0.803054	0.00117772
D11	7	18S	0.803418	0.000745311
D11	8	18S	0.80286	-0.000608469
D11	9	18S	0.803886	-0.000378315
D11	10	18S	0.803734	-0.00132631
D11	11	18S	0.804682	-0.00117346
D11	12	18S	0.805275	-0.00137687
D11	13	18S	0.80919	0.0017425
D11	14	18S	0.809394	0.00115088
D11	15	18S	0.816539	0.00750011
D11	16	18S	0.830644	0.0208094
D11	17	18S	0.857513	0.0468826
D11	18	18S	0.90477	0.0933432
D11	19	18S	0.986835	0.174613
D11	20	18S	1.13118	0.318166
D11	21	18S	1.3383	0.524483
D11	22	18S	1.60927	0.794664
D11	23	18S	1.86914	1.05373
D11	24	18S	2.10768	1.29148
D11	25	18S	2.31642	1.49942
D11	26	18S	2.50489	1.68709
D11	27	18S	2.66204	1.84345
D11	28	18S	2.79053	1.97115
D11	29	18S	2.8968	2.07662
D11	30	18S	2.98748	2.16651
D11	31	18S	3.06693	2.24516
D11	32	18S	3.13594	2.31337
D11	33	18S	3.19577	2.37241
D11	34	18S	3.24009	2.41593
D11	35	18S	3.28458	2.45963
D11	36	18S	3.32371	2.49796
D11	37	18S	3.3627	2.53615
D11	38	18S	3.39423	2.56688
D11	39	18S	3.41994	2.5918
D11	40	18S	3.44082	2.61189
D12	1	18S	0.76653	6.89264e-05
D12	2	18S	0.76708	-0.000349006
D12	3	18S	0.770767	0.00236886
D12	4	18S	0.769064	-0.000303497
D12	5	18S	0.769522	-0.000813697
D12	6	18S	0.770989	-0.000315506
D12	7	18S	0.773356	0.0010826
D12	8	18S	0.771825	-0.00141703
D12	9	18S	0.772775	-0.00143579
D12	10	18S	0.775615	0.000435336
D12	11	18S	0.775062	-0.00108636
D12	12	18S	0.775684	-0.001433
D12	13	18S	0.777398	-0.000688523
D12	14	18S	0.782662	0.0036066
D12	15	18S	0.790502	0.0104781
D12	16	18S	0.803316	0.0223234
D12	17	18S	0.830488	0.0485269
D12	18	18S	0.879014	0.0960837
D12	19	18S	0.969163	0.185264
D12	20	18S	1.11974	0.334876
D12	21	18S	1.34072	0.554886
D12	22	18S	1.6163	0.829494
D12	23	18S	1.89296	1.10518
D12	24	18S	2.1435	1.35476
D12	25	18S	2.36524	1.57552
D12	26	18S	2.55622	1.76554
D12	27	18S	2.71748	1.92583
D12	28	18S	2.84982	2.05721
D12	29	18S	2.95515	2.16157
D12	30	18S	3.04821	2.25365
D12	31	18S	3.13343	2.33791
D12	32	18S	3.20125	2.40476
D12	33	18S	3.25041	2.45295
D12	34	18S	3.30865	2.51022
D12	35	18S	3.34201	2.54261
D12	36	18S	3.38712	2.58675
D12	37	18S	3.42448	2.62315
D12	38	18S	3.45746	2.65516
D12	39	18S	3.48664	2.68336
D12	40	18S	3.50772	2.70347
E1	1	CBF10	0.714934	-0.00890422
E1	2	CBF10	0.715239	-0.00914286
E1	3	CBF10	0.719067	-0.00585748
E1	4	CBF10	0.719097	-0.00637101
E1	5	CBF10	0.721301	-0.00471047
E1	6	CBF10	0.723611	-0.0029443
E1	7	CBF10	0.724639	-0.00246011
E1	8	CBF10	0.726514	-0.00112798
E1	9	CBF10	0.727234	-0.000952062
E1	10	CBF10	0.729641	0.000911918
E1	11	CBF10	0.731118	0.00184547
E1	12	CBF10	0.731941	0.00212468
E1	13	CBF10	0.732062	0.00170181
E1	14	CBF10	0.733312	0.0024088
E1	15	CBF10	0.735383	0.00393631
E1	16	CBF10	0.735705	0.00371413
E1	17	CBF10	0.735187	0.00265289
E1	18	CBF10	0.736783	0.003705
E1	19	CBF10	0.736655	0.00303375
E1	20	CBF10	0.737212	0.00304784
E1	21	CBF10	0.737008	0.00229971
E1	22	CBF10	0.736679	0.00142736
E1	23	CBF10	0.737964	0.00216916
E1	24	CBF10	0.738672	0.00233387
E1	25	CBF10	0.740118	0.00323625
E1	26	CBF10	0.740209	0.00278363
E1	27	CBF10	0.738163	0.000194074
E1	28	CBF10	0.738284	-0.000228798
E1	29	CBF10	0.738699	-0.000357103
E1	30	CBF10	0.73955	-4.94606e-05
E1	31	CBF10	0.739222	-0.000921573
E1	32	CBF10	0.739746	-0.000940385
E1	33	CBF10	0.739609	-0.00162158
E1	34	CBF10	0.739093	-0.00268032
E1	35	CBF10	0.74217	-0.000147216
E1	36	CBF10	0.740245	-0.0026156
E1	37	CBF10	0.740614	-0.00279046
E1	38	CBF10	0.741209	-0.00273846
E1	39	CBF10	0.740479	-0.00401231
E1	40	CBF10	0.740516	-0.00451856
E2	1	CBF10	0.722303	-0.00496249
E2	2	CBF10	0.725695	-0.00136685
E2	3	CBF10	0.72612	-0.00073857
E2	4	CBF10	0.725405	-0.00125076
E2	5	CBF10	0.727086	0.00063333
E2	6	CBF10	0.726709	0.000458917
E2	7	CBF10	0.726865	0.000818561
E2	8	CBF10	0.725368	-0.000475585
E2	9	CBF10	0.725223	-0.000417957
E2	10	CBF10	0.725472	3.40741e-05
E2	11	CBF10	0.724893	-0.000341803
E2	12	CBF10	0.725525	0.000493308
E2	13	CBF10	0.724942	0.000113854
E2	14	CBF10	0.724554	-7.12281e-05
E2	15	CBF10	0.724551	0.000128676
E2	16	CBF10	0.726094	0.00187496
E2	17	CBF10	0.724735	0.00071898
E2	18	CBF10	0.724179	0.000365991
E2	19	CBF10	0.723987	0.00037671
E2	20	CBF10	0.723378	-2.86118e-05
E2	21	CBF10	0.723524	0.000319886
E2	22	CBF10	0.721495	-0.00150558
E2	23	CBF10	0.722814	1.59422e-05
E2	24	CBF10	0.722567	-2.72813e-05
E2	25	CBF10	0.7208	-0.00159167
E2	26	CBF10	0.722032	-0.000156584
E2	27	CBF10	0.72167	-0.000315679
E2	28	CBF10	0.720294	-0.00148829
E2	29	CBF10	0.721477	-0.000102314
E2	30	CBF10	0.721752	0.000375526
E2	31	CBF10	0.722956	0.0017832
E2	32	CBF10	0.727112	0.0061422
E2	33	CBF10	0.737757	0.0169896
[truncated: 1,847 more rows]

## Sheet: BioGroup Analysis Result
Block Type	96alum
Chemistry	SYBR_GREEN
Experiment File Name	D:\HAIFENG\1114Untitled.eds
Experiment Run End Time	2013-01-09 02:40:37 AM CST
Instrument Type	sds7500
Passive Reference	ROX
Biogroup Name	Target Name	Task	RQ	RQ Min	RQ Max	Cт Mean	ΔCт Mean	ΔCт SE	ΔΔCт
Analysis Type	Singleplex
Endogenous Control	CBF10
RQ Min/Max Confidence Level	95.0
Reference Biogroup Name

## Sheet: Technical Analysis Result
Block Type	96alum
Chemistry	SYBR_GREEN
Experiment File Name	D:\HAIFENG\1114Untitled.eds
Experiment Run End Time	2013-01-09 02:40:37 AM CST
Instrument Type	sds7500
Passive Reference	ROX
Sample Name	Target Name	Task	RQ	RQ Min	RQ Max	Cт Mean	ΔCт Mean	ΔCт SE	ΔΔCт
3-1	18S	UNKNOWN				13.0698
9-3	18S	UNKNOWN				18.3351
3-2	18S	UNKNOWN				12.3958
12-1	18S	UNKNOWN				22.9582
3-3	18S	UNKNOWN				15.8132	-16.6489	0.0566335
12-2	18S	UNKNOWN				20.0946	-12.5236
6-1	18S	UNKNOWN				18.1541
12-3	18S	UNKNOWN				19.3677	-13.7569	0.299752
6-2	18S	UNKNOWN				15.8775	-18.0412	0.536678
24-1	18S	UNKNOWN				12.5243	-20.88
6-3	18S	UNKNOWN				13.906
24-2	18S	UNKNOWN				11.1383	-22.8304
9-1	18S	UNKNOWN				19.5502	-17.5495
24-3	18S	UNKNOWN				12.9857	-20.6579	0.0596926
9-2	18S	UNKNOWN				22.5918
Analysis Type	Singleplex
Endogenous Control	CBF10
RQ Min/Max Confidence Level	95.0
Reference Sample	3-1
