# Supplementary material for: Genome-wide identification of CBF genes and their responses to cold acclimation in Taraxacum kok-saghyz
Source: PeerJ. 2022 May 12;10:e13429. doi: 10.7717/peerj.13429 (PMC9107785; doi:10.7717/peerj.13429)
Supplement: Supplemental Information 5 [file peerj-10-13429-s005.xlsx]

## Sheet: 111
EVM.MODEL.UTG14372.5	TATC-box	TATCCCA	1597	7	+	Oryza sativa	cis-acting element involved in gibberellin-responsiveness
EVM.MODEL.UTG14372.5	TATA	TATAAAAT	1430	8	+	Arabidopsis thaliana
EVM.MODEL.UTG14372.5	CAAT-box	CAAAT	80	5	+	Pisum sativum	common cis-acting element in promoter and enhancer regions
EVM.MODEL.UTG14372.5	CAAT-box	CAAAT	114	5	-	Pisum sativum	common cis-acting element in promoter and enhancer regions
EVM.MODEL.UTG14372.5	CAAT-box	CAAT	215	4	-	Nicotiana glutinosa
EVM.MODEL.UTG14372.5	CAAT-box	CCAAT	251	5	-	Arabidopsis thaliana	common cis-acting element in promoter and enhancer regions
EVM.MODEL.UTG14372.5	CAAT-box	CAAAT	263	5	-	Pisum sativum	common cis-acting element in promoter and enhancer regions
EVM.MODEL.UTG14372.5	CAAT-box	CAAT	362	4	+	Nicotiana glutinosa
EVM.MODEL.UTG14372.5	CAAT-box	CAAT	364	4	-	Nicotiana glutinosa
EVM.MODEL.UTG14372.5	CAAT-box	CAAT	406	4	+	Nicotiana glutinosa
EVM.MODEL.UTG14372.5	CAAT-box	CAAAT	408	5	-	Pisum sativum	common cis-acting element in promoter and enhancer regions
EVM.MODEL.UTG14372.5	CAAT-box	CCAAT	446	5	+	Arabidopsis thaliana	common cis-acting element in promoter and enhancer regions
EVM.MODEL.UTG14372.5	CAAT-box	CAAT	447	4	+	Nicotiana glutinosa
EVM.MODEL.UTG14372.5	CAAT-box	CAAAT	646	5	-	Pisum sativum	common cis-acting element in promoter and enhancer regions
EVM.MODEL.UTG14372.5	CAAT-box	CAAT	690	4	-	Nicotiana glutinosa
EVM.MODEL.UTG14372.5	CAAT-box	CAAAT	701	5	+	Pisum sativum	common cis-acting element in promoter and enhancer regions
EVM.MODEL.UTG14372.5	CAAT-box	CAAAT	734	5	+	Pisum sativum	common cis-acting element in promoter and enhancer regions
EVM.MODEL.UTG14372.5	CAAT-box	CAAAT	756	5	+	Pisum sativum	common cis-acting element in promoter and enhancer regions
EVM.MODEL.UTG14372.5	CAAT-box	CAAT	759	4	-	Nicotiana glutinosa
EVM.MODEL.UTG14372.5	CAAT-box	CCAAT	803	5	-	Arabidopsis thaliana	common cis-acting element in promoter and enhancer regions
EVM.MODEL.UTG14372.5	CAAT-box	CAAT	824	4	+	Nicotiana glutinosa
EVM.MODEL.UTG14372.5	CAAT-box	CAAAT	826	5	-	Pisum sativum	common cis-acting element in promoter and enhancer regions
EVM.MODEL.UTG14372.5	CAAT-box	CAAAT	861	5	+	Pisum sativum	common cis-acting element in promoter and enhancer regions
EVM.MODEL.UTG14372.5	CAAT-box	CAAT	875	4	-	Nicotiana glutinosa
EVM.MODEL.UTG14372.5	CAAT-box	CAAT	884	4	-	Nicotiana glutinosa
EVM.MODEL.UTG14372.5	CAAT-box	CAAT	954	4	-	Nicotiana glutinosa
EVM.MODEL.UTG14372.5	CAAT-box	CAAAT	1006	5	-	Pisum sativum	common cis-acting element in promoter and enhancer regions
EVM.MODEL.UTG14372.5	CAAT-box	CAAAT	1072	5	-	Pisum sativum	common cis-acting element in promoter and enhancer regions
EVM.MODEL.UTG14372.5	CAAT-box	CAAT	1156	4	+	Nicotiana glutinosa
EVM.MODEL.UTG14372.5	CAAT-box	CAAAT	1276	5	+	Pisum sativum	common cis-acting element in promoter and enhancer regions
EVM.MODEL.UTG14372.5	CAAT-box	CAAAT	1288	5	+	Pisum sativum	common cis-acting element in promoter and enhancer regions
EVM.MODEL.UTG14372.5	CAAT-box	CAAT	1294	4	-	Nicotiana glutinosa
EVM.MODEL.UTG14372.5	CAAT-box	CAAT	1344	4	-	Nicotiana glutinosa
EVM.MODEL.UTG14372.5	CAAT-box	CAAT	1372	4	+	Nicotiana glutinosa
EVM.MODEL.UTG14372.5	CAAT-box	CAAT	1418	4	+	Nicotiana glutinosa
EVM.MODEL.UTG14372.5	CAAT-box	CAAT	1423	4	-	Nicotiana glutinosa
EVM.MODEL.UTG14372.5	CAAT-box	CAAAT	1569	5	+	Pisum sativum	common cis-acting element in promoter and enhancer regions
EVM.MODEL.UTG14372.5	CAAT-box	CAAT	1618	4	+	Nicotiana glutinosa
EVM.MODEL.UTG14372.5	CAAT-box	CAAAT	1640	5	+	Pisum sativum	common cis-acting element in promoter and enhancer regions
EVM.MODEL.UTG14372.5	CAAT-box	CAAAT	1648	5	-	Pisum sativum	common cis-acting element in promoter and enhancer regions
EVM.MODEL.UTG14372.5	CAAT-box	CAAAT	1670	5	-	Pisum sativum	common cis-acting element in promoter and enhancer regions
EVM.MODEL.UTG14372.5	CAAT-box	CAAT	1689	4	+	Nicotiana glutinosa
EVM.MODEL.UTG14372.5	CAAT-box	CAAAT	1743	5	+	Pisum sativum	common cis-acting element in promoter and enhancer regions
EVM.MODEL.UTG14372.5	CAAT-box	CAAT	1755	4	-	Nicotiana glutinosa
EVM.MODEL.UTG14372.5	CAAT-box	CAAT	1810	4	+	Nicotiana glutinosa
EVM.MODEL.UTG14372.5	CAAT-box	CAAAT	1927	5	+	Pisum sativum	common cis-acting element in promoter and enhancer regions
EVM.MODEL.UTG14372.5	CAAT-box	CAAT	1953	4	+	Nicotiana glutinosa
EVM.MODEL.UTG14372.5	CAAT-box	CAAT	1963	4	+	Nicotiana glutinosa
EVM.MODEL.UTG14372.5	TCA	TCATCTTCAT	1661	9	-	Pisum sativum
EVM.MODEL.UTG14372.5	TCA-element	CCATCTTTTT	622	9	+	Nicotiana tabacum	cis-acting element involved in salicylic acid responsiveness
EVM.MODEL.UTG14372.5	ARE	AAACCA	253	6	-	Zea mays	cis-acting regulatory element essential for the anaerobic induction
EVM.MODEL.UTG14372.5	Box 4	ATTAAT	331	6	+	Petroselinum crispum	part of a conserved DNA module involved in light responsiveness
EVM.MODEL.UTG14372.5	AT~TATA-box	TATATAAA	395	8	-	Arabidopsis thaliana
EVM.MODEL.UTG14372.5	AT~TATA-box	TATATA	397	6	+	Arabidopsis thaliana
EVM.MODEL.UTG14372.5	AT~TATA-box	TATATA	894	6	+	Arabidopsis thaliana
EVM.MODEL.UTG14372.5	AT~TATA-box	TATATA	896	6	+	Arabidopsis thaliana
EVM.MODEL.UTG14372.5	AT~TATA-box	TATATA	1348	6	-	Arabidopsis thaliana
EVM.MODEL.UTG14372.5	AT~TATA-box	TATATA	1380	6	-	Arabidopsis thaliana
EVM.MODEL.UTG14372.5	AT~TATA-box	TATATAAA	1495	8	-	Arabidopsis thaliana
EVM.MODEL.UTG14372.5	AT~TATA-box	TATATA	1497	6	-	Arabidopsis thaliana
EVM.MODEL.UTG14372.5	AT~TATA-box	TATATA	1499	6	-	Arabidopsis thaliana
EVM.MODEL.UTG14372.5	AT~TATA-box	TATATA	1501	6	-	Arabidopsis thaliana
EVM.MODEL.UTG14372.5	AT~TATA-box	TATATA	1503	6	-	Arabidopsis thaliana
EVM.MODEL.UTG14372.5	AT~TATA-box	TATATA	1505	6	-	Arabidopsis thaliana
EVM.MODEL.UTG14372.5	AT~TATA-box	TATATA	1507	6	-	Arabidopsis thaliana
EVM.MODEL.UTG14372.5	AT~TATA-box	TATATA	1509	6	-	Arabidopsis thaliana
EVM.MODEL.UTG14372.5	AT~TATA-box	TATATA	1511	6	-	Arabidopsis thaliana
EVM.MODEL.UTG14372.5	AT~TATA-box	TATATA	1513	6	-	Arabidopsis thaliana
EVM.MODEL.UTG14372.5	AT~TATA-box	TATATA	1515	6	-	Arabidopsis thaliana
EVM.MODEL.UTG14372.5	AT~TATA-box	TATATA	1887	6	-	Arabidopsis thaliana
EVM.MODEL.UTG14372.5	AT~TATA-box	TATATA	1889	6	-	Arabidopsis thaliana
EVM.MODEL.UTG14372.5	AE-box	AGAAACAA	34	8	-	Arabidopsis thaliana	part of a module for light response
EVM.MODEL.UTG14372.5	ABRE4	CACGTA	577	6	-	Zea mays
EVM.MODEL.UTG14372.5	Unnamed__1	CGTGG	579	5	+	Zea mays
EVM.MODEL.UTG14372.5	ABRE3a	TACGTG	577	6	+	Zea mays
EVM.MODEL.UTG14372.5	MYC	CATTTG	80	6	-	Arabidopsis thaliana
EVM.MODEL.UTG14372.5	MYC	CATGTG	153	6	-	Arabidopsis thaliana
EVM.MODEL.UTG14372.5	MYC	CAATTG	362	6	+	Arabidopsis thaliana
EVM.MODEL.UTG14372.5	MYC	CATTTG	645	6	+	Arabidopsis thaliana
EVM.MODEL.UTG14372.5	MYC	CATTTG	1276	6	-	Arabidopsis thaliana
EVM.MODEL.UTG14372.5	MYB	TAACCA	1795	6	-	Arabidopsis thaliana
EVM.MODEL.UTG14372.5	MYB	TAACCA	1966	6	+	Arabidopsis thaliana
EVM.MODEL.UTG14372.5	Myb	CAACTG	31	6	-	Arabidopsis thaliana
EVM.MODEL.UTG14372.5	Myb	TAACTG	1132	6	+	Arabidopsis thaliana
EVM.MODEL.UTG14372.5	ERE	ATTTTAAA	325	8	-	Nicotiana glutinos
EVM.MODEL.UTG14372.5	CTAG-motif	ACTAGCAGAA	912	9	-	Avena sativa
EVM.MODEL.UTG14372.5	GA-motif	ATAGATAA	889	8	-	Arabidopsis thaliana	part of a light responsive element
EVM.MODEL.UTG14372.5		motif_sequence	230	4	-	organism	short_function
EVM.MODEL.UTG14372.5		motif_sequence	310	4	-	organism	short_function
EVM.MODEL.UTG14372.5		motif_sequence	337	4	+	organism	short_function
EVM.MODEL.UTG14372.5		motif_sequence	431	4	+	organism	short_function
EVM.MODEL.UTG14372.5		motif_sequence	682	4	-	organism	short_function
EVM.MODEL.UTG14372.5		motif_sequence	1397	4	+	organism	short_function
EVM.MODEL.UTG14372.5		motif_sequence	1663	4	-	organism	short_function
EVM.MODEL.UTG14372.5		motif_sequence	1725	4	-	organism	short_function
EVM.MODEL.UTG14372.5		motif_sequence	1788	4	+	organism	short_function
EVM.MODEL.UTG14372.5	F-box	CTATTCTCATT	1278	10	-	Lycopersicon esculentum
EVM.MODEL.UTG14372.5	MRE	AACCTAA	454	7	-	Petroselinum crispum	MYB binding site involved in light responsiveness
EVM.MODEL.UTG14372.5	MRE	AACCTAA	1145	7	+	Petroselinum crispum	MYB binding site involved in light responsiveness
EVM.MODEL.UTG14372.5	ACE	CTAACGTATT	448	9	-	Petroselinum crispum	cis-acting element involved in light responsiveness
EVM.MODEL.UTG14372.5	G-Box	CACGTT	1472	6	+	Pisum sativum	cis-acting regulatory element involved in light responsiveness
EVM.MODEL.UTG14372.5	G-Box	CACGTT	1654	6	-	Pisum sativum	cis-acting regulatory element involved in light responsiveness
EVM.MODEL.UTG14372.5	G-box	CCACGTAA	576	8	-	Brassica napus	cis-acting regulatory element involved in light responsiveness
EVM.MODEL.UTG14372.5	G-box	TACGTG	577	6	+	Arabidopsis thaliana	cis-acting regulatory element involved in light responsiveness
EVM.MODEL.UTG14372.5	TATA-box	TATA	193	4	+	Arabidopsis thaliana	core promoter element around -30 of transcription start
EVM.MODEL.UTG14372.5	TATA-box	ATATAA	273	6	+	Brassica oleracea	core promoter element around -30 of transcription start
EVM.MODEL.UTG14372.5	TATA-box	TATA	274	4	+	Arabidopsis thaliana	core promoter element around -30 of transcription start
EVM.MODEL.UTG14372.5	TATA-box	TAAAGATT	291	8	-	Arabidopsis thaliana	core promoter element around -30 of transcription start
EVM.MODEL.UTG14372.5	TATA-box	ATATAA	344	6	+	Brassica oleracea	core promoter element around -30 of transcription start
EVM.MODEL.UTG14372.5	TATA-box	TATA	345	4	+	Arabidopsis thaliana	core promoter element around -30 of transcription start
EVM.MODEL.UTG14372.5	TATA-box	taTATAAAtc	393	9	-	Arabidopsis thaliana	core promoter element around -30 of transcription start
EVM.MODEL.UTG14372.5	TATA-box	TATAAAT	394	7	-	Brassica juncea	core promoter element around -30 of transcription start
EVM.MODEL.UTG14372.5	TATA-box	TATAAA	395	6	-	Helianthus annuus	core promoter element around -30 of transcription start
EVM.MODEL.UTG14372.5	TATA-box	TATATAA	396	7	-	Arabidopsis thaliana	core promoter element around -30 of transcription start
EVM.MODEL.UTG14372.5	TATA-box	TATATA	397	6	+	Arabidopsis thaliana	core promoter element around -30 of transcription start
EVM.MODEL.UTG14372.5	TATA-box	TATA	399	4	+	Arabidopsis thaliana	core promoter element around -30 of transcription start
EVM.MODEL.UTG14372.5	TATA-box	TACAAAA	594	7	-	Oryza sativa	core promoter element around -30 of transcription start
EVM.MODEL.UTG14372.5	TATA-box	ATTATA	737	6	+	Brassica napus	core promoter element around -30 of transcription start
EVM.MODEL.UTG14372.5	TATA-box	TATAA	738	5	-	Arabidopsis thaliana	core promoter element around -30 of transcription start
EVM.MODEL.UTG14372.5	TATA-box	TATA	739	4	+	Arabidopsis thaliana	core promoter element around -30 of transcription start
EVM.MODEL.UTG14372.5	TATA-box	TATA	795	4	+	Arabidopsis thaliana	core promoter element around -30 of transcription start
EVM.MODEL.UTG14372.5	TATA-box	TATATA	894	6	+	Arabidopsis thaliana	core promoter element around -30 of transcription start
EVM.MODEL.UTG14372.5	TATA-box	ATATAT	895	6	+	Brassica napus	core promoter element around -30 of transcription start
EVM.MODEL.UTG14372.5	TATA-box	TATATA	896	6	+	Arabidopsis thaliana	core promoter element around -30 of transcription start
EVM.MODEL.UTG14372.5	TATA-box	ATATAA	897	6	+	Brassica oleracea	core promoter element around -30 of transcription start
EVM.MODEL.UTG14372.5	TATA-box	TATA	898	4	+	Arabidopsis thaliana	core promoter element around -30 of transcription start
EVM.MODEL.UTG14372.5	TATA-box	ATATAA	920	6	+	Brassica oleracea	core promoter element around -30 of transcription start
EVM.MODEL.UTG14372.5	TATA-box	TATA	921	4	+	Arabidopsis thaliana	core promoter element around -30 of transcription start
EVM.MODEL.UTG14372.5	TATA-box	TATTTAAA	966	8	-	Arabidopsis thaliana	core promoter element around -30 of transcription start
EVM.MODEL.UTG14372.5	TATA-box	TATAAAT	1000	7	-	Brassica juncea	core promoter element around -30 of transcription start
EVM.MODEL.UTG14372.5	TATA-box	TATAAA	1001	6	-	Helianthus annuus	core promoter element around -30 of transcription start
EVM.MODEL.UTG14372.5	TATA-box	TATAA	1002	5	-	Arabidopsis thaliana	core promoter element around -30 of transcription start
EVM.MODEL.UTG14372.5	TATA-box	TATA	1003	4	+	Arabidopsis thaliana	core promoter element around -30 of transcription start
EVM.MODEL.UTG14372.5	TATA-box	TATAAAA	1029	7	-	Pisum sativum	core promoter element around -30 of transcription start
EVM.MODEL.UTG14372.5	TATA-box	TATAAA	1030	6	-	Helianthus annuus	core promoter element around -30 of transcription start
EVM.MODEL.UTG14372.5	TATA-box	TATAA	1031	5	-	Arabidopsis thaliana	core promoter element around -30 of transcription start
EVM.MODEL.UTG14372.5	TATA-box	TATA	1032	4	-	Arabidopsis thaliana	core promoter element around -30 of transcription start
EVM.MODEL.UTG14372.5	TATA-box	TATA	1085	4	-	Arabidopsis thaliana	core promoter element around -30 of transcription start
EVM.MODEL.UTG14372.5	TATA-box	TATTTAAA	1201	8	+	Arabidopsis thaliana	core promoter element around -30 of transcription start
EVM.MODEL.UTG14372.5	TATA-box	TAAAGATT	1207	8	-	Arabidopsis thaliana	core promoter element around -30 of transcription start
EVM.MODEL.UTG14372.5	TATA-box	TATAAA	1211	6	-	Helianthus annuus	core promoter element around -30 of transcription start
EVM.MODEL.UTG14372.5	TATA-box	TATAA	1212	5	-	Arabidopsis thaliana	core promoter element around -30 of transcription start
EVM.MODEL.UTG14372.5	TATA-box	TATA	1213	4	-	Arabidopsis thaliana	core promoter element around -30 of transcription start
EVM.MODEL.UTG14372.5	TATA-box	TATA	1264	4	-	Arabidopsis thaliana	core promoter element around -30 of transcription start
EVM.MODEL.UTG14372.5	TATA-box	TATAAAA	1318	7	-	Pisum sativum	core promoter element around -30 of transcription start
EVM.MODEL.UTG14372.5	TATA-box	TATAAA	1319	6	-	Helianthus annuus	core promoter element around -30 of transcription start
EVM.MODEL.UTG14372.5	TATA-box	TATAA	1320	5	-	Arabidopsis thaliana	core promoter element around -30 of transcription start
EVM.MODEL.UTG14372.5	TATA-box	TATA	1321	4	-	Arabidopsis thaliana	core promoter element around -30 of transcription start
EVM.MODEL.UTG14372.5	TATA-box	TATAA	1336	5	-	Arabidopsis thaliana	core promoter element around -30 of transcription start
EVM.MODEL.UTG14372.5	TATA-box	TATA	1337	4	-	Arabidopsis thaliana	core promoter element around -30 of transcription start
EVM.MODEL.UTG14372.5	TATA-box	TATACA	1346	6	-	Helianthus annuus	core promoter element around -30 of transcription start
EVM.MODEL.UTG14372.5	TATA-box	TATATA	1348	6	-	Arabidopsis thaliana	core promoter element around -30 of transcription start
EVM.MODEL.UTG14372.5	TATA-box	TATA	1350	4	-	Arabidopsis thaliana	core promoter element around -30 of transcription start
EVM.MODEL.UTG14372.5	TATA-box	TATA	1360	4	-	Arabidopsis thaliana	core promoter element around -30 of transcription start
EVM.MODEL.UTG14372.5	TATA-box	TATA	1366	4	-	Arabidopsis thaliana	core promoter element around -30 of transcription start
EVM.MODEL.UTG14372.5	TATA-box	ATATAT	1379	6	-	Brassica napus	core promoter element around -30 of transcription start
EVM.MODEL.UTG14372.5	TATA-box	TATATA	1380	6	-	Arabidopsis thaliana	core promoter element around -30 of transcription start
EVM.MODEL.UTG14372.5	TATA-box	ATATAT	1381	6	-	Brassica napus	core promoter element around -30 of transcription start
EVM.MODEL.UTG14372.5	TATA-box	TATA	1382	4	-	Arabidopsis thaliana	core promoter element around -30 of transcription start
EVM.MODEL.UTG14372.5	TATA-box	TATACA	1428	6	-	Helianthus annuus	core promoter element around -30 of transcription start
EVM.MODEL.UTG14372.5	TATA-box	TATA	1430	4	-	Arabidopsis thaliana	core promoter element around -30 of transcription start
EVM.MODEL.UTG14372.5	TATA-box	TATAAAT	1436	7	-	Brassica juncea	core promoter element around -30 of transcription start
EVM.MODEL.UTG14372.5	TATA-box	TATAAA	1437	6	-	Helianthus annuus	core promoter element around -30 of transcription start
EVM.MODEL.UTG14372.5	TATA-box	TATAA	1438	5	-	Arabidopsis thaliana	core promoter element around -30 of transcription start
EVM.MODEL.UTG14372.5	TATA-box	TATA	1439	4	-	Arabidopsis thaliana	core promoter element around -30 of transcription start
EVM.MODEL.UTG14372.5	TATA-box	TACAAAA	1455	7	+	Oryza sativa	core promoter element around -30 of transcription start
EVM.MODEL.UTG14372.5	TATA-box	TATAAA	1495	6	-	Helianthus annuus	core promoter element around -30 of transcription start
EVM.MODEL.UTG14372.5	TATA-box	TATATAA	1496	7	-	Arabidopsis thaliana	core promoter element around -30 of transcription start
EVM.MODEL.UTG14372.5	TATA-box	TATATA	1497	6	-	Arabidopsis thaliana	core promoter element around -30 of transcription start
EVM.MODEL.UTG14372.5	TATA-box	ATATAT	1498	6	-	Brassica napus	core promoter element around -30 of transcription start
EVM.MODEL.UTG14372.5	TATA-box	TATATA	1499	6	-	Arabidopsis thaliana	core promoter element around -30 of transcription start
EVM.MODEL.UTG14372.5	TATA-box	ATATAT	1500	6	-	Brassica napus	core promoter element around -30 of transcription start
EVM.MODEL.UTG14372.5	TATA-box	TATATA	1501	6	-	Arabidopsis thaliana	core promoter element around -30 of transcription start
EVM.MODEL.UTG14372.5	TATA-box	ATATAT	1502	6	-	Brassica napus	core promoter element around -30 of transcription start
EVM.MODEL.UTG14372.5	TATA-box	TATATA	1503	6	-	Arabidopsis thaliana	core promoter element around -30 of transcription start
EVM.MODEL.UTG14372.5	TATA-box	ATATAT	1504	6	-	Brassica napus	core promoter element around -30 of transcription start
EVM.MODEL.UTG14372.5	TATA-box	TATATA	1505	6	-	Arabidopsis thaliana	core promoter element around -30 of transcription start
EVM.MODEL.UTG14372.5	TATA-box	ATATAT	1506	6	-	Brassica napus	core promoter element around -30 of transcription start
EVM.MODEL.UTG14372.5	TATA-box	TATATA	1507	6	-	Arabidopsis thaliana	core promoter element around -30 of transcription start
EVM.MODEL.UTG14372.5	TATA-box	ATATAT	1508	6	-	Brassica napus	core promoter element around -30 of transcription start
EVM.MODEL.UTG14372.5	TATA-box	TATATA	1509	6	-	Arabidopsis thaliana	core promoter element around -30 of transcription start
EVM.MODEL.UTG14372.5	TATA-box	ATATAT	1510	6	-	Brassica napus	core promoter element around -30 of transcription start
EVM.MODEL.UTG14372.5	TATA-box	TATATA	1511	6	-	Arabidopsis thaliana	core promoter element around -30 of transcription start
EVM.MODEL.UTG14372.5	TATA-box	ATATAT	1512	6	-	Brassica napus	core promoter element around -30 of transcription start
EVM.MODEL.UTG14372.5	TATA-box	TATATA	1513	6	-	Arabidopsis thaliana	core promoter element around -30 of transcription start
EVM.MODEL.UTG14372.5	TATA-box	ATATAT	1514	6	-	Brassica napus	core promoter element around -30 of transcription start
EVM.MODEL.UTG14372.5	TATA-box	TATATA	1515	6	-	Arabidopsis thaliana	core promoter element around -30 of transcription start
EVM.MODEL.UTG14372.5	TATA-box	TATA	1517	4	-	Arabidopsis thaliana	core promoter element around -30 of transcription start
EVM.MODEL.UTG14372.5	TATA-box	TATA	1595	4	-	Arabidopsis thaliana	core promoter element around -30 of transcription start
EVM.MODEL.UTG14372.5	TATA-box	ATATAT	1784	6	-	Brassica napus	core promoter element around -30 of transcription start
EVM.MODEL.UTG14372.5	TATA-box	TATA	1785	4	-	Arabidopsis thaliana	core promoter element around -30 of transcription start
EVM.MODEL.UTG14372.5	TATA-box	TATACA	1885	6	-	Helianthus annuus	core promoter element around -30 of transcription start
EVM.MODEL.UTG14372.5	TATA-box	TATATA	1887	6	-	Arabidopsis thaliana	core promoter element around -30 of transcription start
EVM.MODEL.UTG14372.5	TATA-box	ATATAT	1888	6	-	Brassica napus	core promoter element around -30 of transcription start
EVM.MODEL.UTG14372.5	TATA-box	TATATA	1889	6	-	Arabidopsis thaliana	core promoter element around -30 of transcription start
EVM.MODEL.UTG14372.5	TATA-box	TATA	1891	4	-	Arabidopsis thaliana	core promoter element around -30 of transcription start
EVM.MODEL.UTG14372.5	TC-rich repeats	GTTTTCTTAC	704	9	-	Nicotiana tabacum	cis-acting element involved in defense and stress responsiveness
EVM.MODEL.UTG14372.5	HD-Zip 1	CAAT(A/T)ATTG	1418	8.5	-	Arabidopsis thaliana	element involved in differentiation of the palisade mesophyll cells
EVM.MODEL.UTG14372.5	LTR	CCGAAA	542	6	-	Hordeum vulgare	cis-acting element involved in low-temperature responsiveness
EVM.MODEL.UTG14372.5	ABRE	ACGTG	578	5	+	Arabidopsis thaliana	cis-acting element involved in the abscisic acid responsiveness
EVM.MODEL.UTG14372.5	ABRE	ACGTG	1472	5	-	Arabidopsis thaliana	cis-acting element involved in the abscisic acid responsiveness
EVM.MODEL.UTG14372.5	ABRE	ACGTG	1655	5	+	Arabidopsis thaliana	cis-acting element involved in the abscisic acid responsiveness
EVM.MODEL.UTG14372.5	chs-CMA1a	TTACTTAA	1127	8	+	Daucus carota	part of a light responsive element
EVM.MODEL.UTG14372.5	GT1-motif	GGTTAA	558	6	-	Arabidopsis thaliana	light responsive element
EVM.MODEL.UTG14372.5	GT1-motif	GGTTAA	1796	6	+	Arabidopsis thaliana	light responsive element
EVM.MODEL.UTG14372.5	GT1-motif	GTGTGTGAA	1865	9	-	Solanum tuberosum	light responsive element
EVM.MODEL.UTG14372.5	MBS	CAACTG	31	6	-	Arabidopsis thaliana	MYB binding site involved in drought-inducibility
EVM.MODEL.UTG14372.5	WUN-motif	AAATTTCTT	379	9	+	Nicotiana glutinosa
EVM.MODEL.UTG14372.5	MYB-like sequence	TAACCA	1795	6	-	Arabidopsis thaliana
EVM.MODEL.UTG14372.5	MYB-like sequence	TAACCA	1966	6	+	Arabidopsis thaliana
EVM.MODEL.UTG14372.5	AAGAA-motif	GAAAGAA	38	7	-	Avena sativa
EVM.MODEL.UTG14372.5	AAGAA-motif	gGTAAAGAAA	144	9	-	Avena sativa
EVM.MODEL.UTG14372.5	AAGAA-motif	GAAAGAA	1183	7	-	Avena sativa
EVM.MODEL.UTG14372.5	AAGAA-motif	gGTAAAGAAA	1223	9	-	Avena sativa
EVM.MODEL.UTG14372.5	Myc	TCTCTTA	1332	7	+	Arabidopsis thaliana
EVM.MODEL.UTG14372.5	Box III	atCATTTTCACt	784	11	+	Pisum sativum	protein binding site
EVM.MODEL.UTG14372.5	W box	TTGACC	1705	6	+	Arabidopsis thaliana
EVM.MODEL.UTG14372.5	Unnamed__4	CTCC	310	4	-	Petroselinum hortense
EVM.MODEL.UTG14372.5	Unnamed__4	CTCC	1827	4	+	Petroselinum hortense
EVM.MODEL.UTG14372.5	Unnamed__4	CTCC	1875	4	+	Petroselinum hortense
EVM.MODEL.UTG16021.12	G-box	CACGAC	215	6	-	Zea mays	cis-acting regulatory element involved in light responsiveness
EVM.MODEL.UTG16021.12	G-Box	CACGTT	1449	6	+	Pisum sativum	cis-acting regulatory element involved in light responsiveness
EVM.MODEL.UTG16021.12	TGACG-motif	TGACG	1962	5	-	Hordeum vulgare	cis-acting regulatory element involved in the MeJA-responsiveness
EVM.MODEL.UTG16021.12	as-1	TGACG	1962	5	-	Arabidopsis thaliana
EVM.MODEL.UTG16021.12	MSA-like	(T/C)C(T/C)AACGG(T/C)(T/C)A	383	8.5	-	Catharanthus roseus	cis-acting element involved in cell cycle regulation
EVM.MODEL.UTG16021.12	Myb-binding site	CAACAG	1953	6	+	Nicotiana tabacum
EVM.MODEL.UTG16021.12	TATA-box	TATTTAAA	186	8	-	Arabidopsis thaliana	core promoter element around -30 of transcription start
EVM.MODEL.UTG16021.12	TATA-box	TATAAA	367	6	-	Helianthus annuus	core promoter element around -30 of transcription start
EVM.MODEL.UTG16021.12	TATA-box	TATAA	368	5	-	Arabidopsis thaliana	core promoter element around -30 of transcription start
EVM.MODEL.UTG16021.12	TATA-box	TATA	369	4	+	Arabidopsis thaliana	core promoter element around -30 of transcription start
EVM.MODEL.UTG16021.12	TATA-box	TATACA	373	6	-	Helianthus annuus	core promoter element around -30 of transcription start
EVM.MODEL.UTG16021.12	TATA-box	TATA	375	4	+	Arabidopsis thaliana	core promoter element around -30 of transcription start
EVM.MODEL.UTG16021.12	TATA-box	TATAA	396	5	-	Arabidopsis thaliana	core promoter element around -30 of transcription start
EVM.MODEL.UTG16021.12	TATA-box	TATA	397	4	+	Arabidopsis thaliana	core promoter element around -30 of transcription start
EVM.MODEL.UTG16021.12	TATA-box	TATA	428	4	+	Arabidopsis thaliana	core promoter element around -30 of transcription start
EVM.MODEL.UTG16021.12	TATA-box	TATAAA	437	6	-	Helianthus annuus	core promoter element around -30 of transcription start
EVM.MODEL.UTG16021.12	TATA-box	TATAA	438	5	-	Arabidopsis thaliana	core promoter element around -30 of transcription start
EVM.MODEL.UTG16021.12	TATA-box	TATA	439	4	+	Arabidopsis thaliana	core promoter element around -30 of transcription start
EVM.MODEL.UTG16021.12	TATA-box	TATAA	644	5	-	Arabidopsis thaliana	core promoter element around -30 of transcription start
EVM.MODEL.UTG16021.12	TATA-box	TATA	645	4	+	Arabidopsis thaliana	core promoter element around -30 of transcription start
EVM.MODEL.UTG16021.12	TATA-box	ATTATA	657	6	+	Brassica napus	core promoter element around -30 of transcription start
EVM.MODEL.UTG16021.12	TATA-box	TATAA	658	5	-	Arabidopsis thaliana	core promoter element around -30 of transcription start
EVM.MODEL.UTG16021.12	TATA-box	TATA	659	4	+	Arabidopsis thaliana	core promoter element around -30 of transcription start
EVM.MODEL.UTG16021.12	TATA-box	ATATAA	735	6	+	Brassica oleracea	core promoter element around -30 of transcription start
EVM.MODEL.UTG16021.12	TATA-box	TATA	736	4	+	Arabidopsis thaliana	core promoter element around -30 of transcription start
EVM.MODEL.UTG16021.12	TATA-box	TATAAA	813	6	-	Helianthus annuus	core promoter element around -30 of transcription start
EVM.MODEL.UTG16021.12	TATA-box	TATAA	814	5	-	Arabidopsis thaliana	core promoter element around -30 of transcription start
EVM.MODEL.UTG16021.12	TATA-box	TATA	815	4	+	Arabidopsis thaliana	core promoter element around -30 of transcription start
EVM.MODEL.UTG16021.12	TATA-box	ccTATAAAaa	937	9	-	Arabidopsis thaliana	core promoter element around -30 of transcription start
EVM.MODEL.UTG16021.12	TATA-box	TATAAAA	938	7	-	Pisum sativum	core promoter element around -30 of transcription start
EVM.MODEL.UTG16021.12	TATA-box	TATAAA	939	6	-	Helianthus annuus	core promoter element around -30 of transcription start
EVM.MODEL.UTG16021.12	TATA-box	TATAA	940	5	-	Arabidopsis thaliana	core promoter element around -30 of transcription start
EVM.MODEL.UTG16021.12	TATA-box	TATA	941	4	+	Arabidopsis thaliana	core promoter element around -30 of transcription start
EVM.MODEL.UTG16021.12	TATA-box	TATA	949	4	+	Arabidopsis thaliana	core promoter element around -30 of transcription start
EVM.MODEL.UTG16021.12	TATA-box	TATAAATA	968	8	-	Daucus carota	core promoter element around -30 of transcription start
EVM.MODEL.UTG16021.12	TATA-box	TATAAAT	969	7	-	Brassica juncea	core promoter element around -30 of transcription start
EVM.MODEL.UTG16021.12	TATA-box	TATAAA	970	6	-	Helianthus annuus	core promoter element around -30 of transcription start
EVM.MODEL.UTG16021.12	TATA-box	TATAA	971	5	-	Arabidopsis thaliana	core promoter element around -30 of transcription start
EVM.MODEL.UTG16021.12	TATA-box	TATA	972	4	+	Arabidopsis thaliana	core promoter element around -30 of transcription start
EVM.MODEL.UTG16021.12	TATA-box	TATA	1148	4	-	Arabidopsis thaliana	core promoter element around -30 of transcription start
EVM.MODEL.UTG16021.12	TATA-box	ATATAA	1155	6	+	Brassica oleracea	core promoter element around -30 of transcription start
EVM.MODEL.UTG16021.12	TATA-box	TATA	1156	4	-	Arabidopsis thaliana	core promoter element around -30 of transcription start
EVM.MODEL.UTG16021.12	TATA-box	TATAA	1244	5	-	Arabidopsis thaliana	core promoter element around -30 of transcription start
EVM.MODEL.UTG16021.12	TATA-box	TATA	1245	4	-	Arabidopsis thaliana	core promoter element around -30 of transcription start
EVM.MODEL.UTG16021.12	TATA-box	ATTATA	1274	6	+	Brassica napus	core promoter element around -30 of transcription start
EVM.MODEL.UTG16021.12	TATA-box	TATAA	1275	5	-	Arabidopsis thaliana	core promoter element around -30 of transcription start
EVM.MODEL.UTG16021.12	TATA-box	TATA	1276	4	-	Arabidopsis thaliana	core promoter element around -30 of transcription start
EVM.MODEL.UTG16021.12	TATA-box	ATTATA	1281	6	+	Brassica napus	core promoter element around -30 of transcription start
EVM.MODEL.UTG16021.12	TATA-box	TATAA	1282	5	-	Arabidopsis thaliana	core promoter element around -30 of transcription start
EVM.MODEL.UTG16021.12	TATA-box	TATA	1283	4	-	Arabidopsis thaliana	core promoter element around -30 of transcription start
EVM.MODEL.UTG16021.12	TATA-box	ATATAT	1299	6	-	Brassica napus	core promoter element around -30 of transcription start
EVM.MODEL.UTG16021.12	TATA-box	TATA	1300	4	-	Arabidopsis thaliana	core promoter element around -30 of transcription start
EVM.MODEL.UTG16021.12	TATA-box	ATATAA	1373	6	+	Brassica oleracea	core promoter element around -30 of transcription start
EVM.MODEL.UTG16021.12	TATA-box	TATA	1374	4	-	Arabidopsis thaliana	core promoter element around -30 of transcription start
EVM.MODEL.UTG16021.12	TATA-box	ATATAT	1380	6	-	Brassica napus	core promoter element around -30 of transcription start
EVM.MODEL.UTG16021.12	TATA-box	TATATA	1381	6	-	Arabidopsis thaliana	core promoter element around -30 of transcription start
EVM.MODEL.UTG16021.12	TATA-box	TATA	1383	4	-	Arabidopsis thaliana	core promoter element around -30 of transcription start
EVM.MODEL.UTG16021.12	TATA-box	TATA	1396	4	-	Arabidopsis thaliana	core promoter element around -30 of transcription start
EVM.MODEL.UTG16021.12	TATA-box	ATATAT	1517	6	-	Brassica napus	core promoter element around -30 of transcription start
EVM.MODEL.UTG16021.12	TATA-box	TATA	1518	4	-	Arabidopsis thaliana	core promoter element around -30 of transcription start
EVM.MODEL.UTG16021.12	TATA-box	TATA	1604	4	-	Arabidopsis thaliana	core promoter element around -30 of transcription start
EVM.MODEL.UTG16021.12	TATA-box	TATA	1674	4	-	Arabidopsis thaliana	core promoter element around -30 of transcription start
EVM.MODEL.UTG16021.12	TATA-box	ATATAT	1698	6	-	Brassica napus	core promoter element around -30 of transcription start
EVM.MODEL.UTG16021.12	TATA-box	TATATA	1699	6	-	Arabidopsis thaliana	core promoter element around -30 of transcription start
EVM.MODEL.UTG16021.12	TATA-box	ATATAT	1700	6	-	Brassica napus	core promoter element around -30 of transcription start
EVM.MODEL.UTG16021.12	TATA-box	TATATA	1701	6	-	Arabidopsis thaliana	core promoter element around -30 of transcription start
EVM.MODEL.UTG16021.12	TATA-box	ATATAT	1702	6	-	Brassica napus	core promoter element around -30 of transcription start
EVM.MODEL.UTG16021.12	TATA-box	TATA	1703	4	-	Arabidopsis thaliana	core promoter element around -30 of transcription start
EVM.MODEL.UTG16021.12	TATA-box	TATAAAA	1713	7	-	Pisum sativum	core promoter element around -30 of transcription start
EVM.MODEL.UTG16021.12	TATA-box	TATAAA	1714	6	-	Helianthus annuus	core promoter element around -30 of transcription start
EVM.MODEL.UTG16021.12	TATA-box	TATATAA	1715	7	-	Arabidopsis thaliana	core promoter element around -30 of transcription start
EVM.MODEL.UTG16021.12	TATA-box	TATATA	1716	6	-	Arabidopsis thaliana	core promoter element around -30 of transcription start
EVM.MODEL.UTG16021.12	TATA-box	ATATAT	1717	6	-	Brassica napus	core promoter element around -30 of transcription start
EVM.MODEL.UTG16021.12	TATA-box	TATATA	1718	6	-	Arabidopsis thaliana	core promoter element around -30 of transcription start
EVM.MODEL.UTG16021.12	TATA-box	TATA	1720	4	-	Arabidopsis thaliana	core promoter element around -30 of transcription start
EVM.MODEL.UTG16021.12	TATA-box	TATA	1752	4	-	Arabidopsis thaliana	core promoter element around -30 of transcription start
EVM.MODEL.UTG16021.12	TATA-box	TACAAAA	1774	7	+	Oryza sativa	core promoter element around -30 of transcription start
EVM.MODEL.UTG16021.12	TATA-box	TATACA	1881	6	-	Helianthus annuus	core promoter element around -30 of transcription start
EVM.MODEL.UTG16021.12	TATA-box	TATATA	1883	6	-	Arabidopsis thaliana	core promoter element around -30 of transcription start
EVM.MODEL.UTG16021.12	TATA-box	ATATAT	1884	6	-	Brassica napus	core promoter element around -30 of transcription start
EVM.MODEL.UTG16021.12	TATA-box	TATATA	1885	6	-	Arabidopsis thaliana	core promoter element around -30 of transcription start
EVM.MODEL.UTG16021.12	TATA-box	ATATAT	1886	6	-	Brassica napus	core promoter element around -30 of transcription start
EVM.MODEL.UTG16021.12	TATA-box	TATATA	1887	6	-	Arabidopsis thaliana	core promoter element around -30 of transcription start
EVM.MODEL.UTG16021.12	TATA-box	TATA	1889	4	-	Arabidopsis thaliana	core promoter element around -30 of transcription start
EVM.MODEL.UTG16021.12	TATA-box	TATA	2018	4	-	Arabidopsis thaliana	core promoter element around -30 of transcription start
EVM.MODEL.UTG16021.12	ABRE	ACGTG	1449	5	-	Arabidopsis thaliana	cis-acting element involved in the abscisic acid responsiveness
EVM.MODEL.UTG16021.12	MYB recognition site	CCGTTG	386	6	+	Arabidopsis thaliana
EVM.MODEL.UTG16021.12	WUN-motif	AAATTACT	833	8	+	Nicotiana glutinosa
EVM.MODEL.UTG16021.12	MYB-like sequence	TAACCA	313	6	-	Arabidopsis thaliana
EVM.MODEL.UTG16021.12	MYB-like sequence	TAACCA	1023	6	+	Arabidopsis thaliana
EVM.MODEL.UTG16021.12	GT1-motif	GGTTAA	1022	6	-	Arabidopsis thaliana	light responsive element
EVM.MODEL.UTG16021.12	GT1-motif	GGTTAA	1813	6	+	Arabidopsis thaliana	light responsive element
EVM.MODEL.UTG16021.12	AAGAA-motif	gGTAAAGAAA	245	9	-	Avena sativa
EVM.MODEL.UTG16021.12	AAGAA-motif	GAAAGAA	581	7	+	Avena sativa
EVM.MODEL.UTG16021.12	CCAAT-box	CAACGG	386	6	-	Hordeum vulgare	MYBHv1 binding site
EVM.MODEL.UTG16021.12	Unnamed__4	CTCC	136	4	+	Petroselinum hortense
EVM.MODEL.UTG16021.12	Unnamed__4	CTCC	200	4	-	Petroselinum hortense
EVM.MODEL.UTG16021.12	Unnamed__4	CTCC	323	4	-	Petroselinum hortense
EVM.MODEL.UTG16021.12	Unnamed__4	CTCC	422	4	-	Petroselinum hortense
EVM.MODEL.UTG16021.12	Unnamed__4	CTCC	1000	4	-	Petroselinum hortense
EVM.MODEL.UTG16021.12	Unnamed__4	CTCC	1850	4	+	Petroselinum hortense
EVM.MODEL.UTG16021.12	Unnamed__4	CTCC	1873	4	+	Petroselinum hortense
EVM.MODEL.UTG16021.12	Box III	atCATTTTCACt	926	11	+	Pisum sativum	protein binding site
EVM.MODEL.UTG16021.12	CAAT-box	CAAT	36	4	+	Nicotiana glutinosa
EVM.MODEL.UTG16021.12	CAAT-box	CCAAT	43	5	+	Arabidopsis thaliana	common cis-acting element in promoter and enhancer regions
EVM.MODEL.UTG16021.12	CAAT-box	CAAT	44	4	+	Nicotiana glutinosa
EVM.MODEL.UTG16021.12	CAAT-box	CCAAT	138	5	+	Arabidopsis thaliana	common cis-acting element in promoter and enhancer regions
EVM.MODEL.UTG16021.12	CAAT-box	CAAT	139	4	+	Nicotiana glutinosa
EVM.MODEL.UTG16021.12	CAAT-box	CAAAT	284	5	+	Pisum sativum	common cis-acting element in promoter and enhancer regions
EVM.MODEL.UTG16021.12	CAAT-box	CCAAT	287	5	-	Arabidopsis thaliana	common cis-acting element in promoter and enhancer regions
EVM.MODEL.UTG16021.12	CAAT-box	CAAT	333	4	-	Nicotiana glutinosa
EVM.MODEL.UTG16021.12	CAAT-box	CCAAT	404	5	-	Arabidopsis thaliana	common cis-acting element in promoter and enhancer regions
EVM.MODEL.UTG16021.12	CAAT-box	CAAT	459	4	-	Nicotiana glutinosa
EVM.MODEL.UTG16021.12	CAAT-box	CAAT	473	4	-	Nicotiana glutinosa
EVM.MODEL.UTG16021.12	CAAT-box	CAAT	501	4	+	Nicotiana glutinosa
EVM.MODEL.UTG16021.12	CAAT-box	TGCCAAC	532	7	+	Petunia hybrida	common cis-acting element in promoter and enhancer regions
EVM.MODEL.UTG16021.12	CAAT-box	CCAAT	598	5	-	Arabidopsis thaliana	common cis-acting element in promoter and enhancer regions
EVM.MODEL.UTG16021.12	CAAT-box	CCAAT	629	5	+	Arabidopsis thaliana	common cis-acting element in promoter and enhancer regions
EVM.MODEL.UTG16021.12	CAAT-box	CAAT	630	4	+	Nicotiana glutinosa
EVM.MODEL.UTG16021.12	CAAT-box	CAAAT	671	5	+	Pisum sativum	common cis-acting element in promoter and enhancer regions
EVM.MODEL.UTG16021.12	CAAT-box	CAAT	684	4	-	Nicotiana glutinosa
EVM.MODEL.UTG16021.12	CAAT-box	CAAT	700	4	-	Nicotiana glutinosa
EVM.MODEL.UTG16021.12	CAAT-box	CAAT	706	4	-	Nicotiana glutinosa
EVM.MODEL.UTG16021.12	CAAT-box	CAAT	724	4	-	Nicotiana glutinosa
EVM.MODEL.UTG16021.12	CAAT-box	CAAT	733	4	+	Nicotiana glutinosa
EVM.MODEL.UTG16021.12	CAAT-box	CAAT	768	4	+	Nicotiana glutinosa
EVM.MODEL.UTG16021.12	CAAT-box	CAAT	843	4	+	Nicotiana glutinosa
EVM.MODEL.UTG16021.12	CAAT-box	CAAT	865	4	+	Nicotiana glutinosa
EVM.MODEL.UTG16021.12	CAAT-box	CAAAT	875	5	-	Pisum sativum	common cis-acting element in promoter and enhancer regions
EVM.MODEL.UTG16021.12	CAAT-box	CAAT	965	4	+	Nicotiana glutinosa
EVM.MODEL.UTG16021.12	CAAT-box	CAAT	1058	4	-	Nicotiana glutinosa
EVM.MODEL.UTG16021.12	CAAT-box	CAAT	1092	4	+	Nicotiana glutinosa
EVM.MODEL.UTG16021.12	CAAT-box	CCAAT	1180	5	+	Arabidopsis thaliana	common cis-acting element in promoter and enhancer regions
EVM.MODEL.UTG16021.12	CAAT-box	CAAT	1181	4	+	Nicotiana glutinosa
EVM.MODEL.UTG16021.12	CAAT-box	CCAAT	1207	5	+	Arabidopsis thaliana	common cis-acting element in promoter and enhancer regions
EVM.MODEL.UTG16021.12	CAAT-box	CAAT	1208	4	+	Nicotiana glutinosa
EVM.MODEL.UTG16021.12	CAAT-box	CAAT	1335	4	-	Nicotiana glutinosa
EVM.MODEL.UTG16021.12	CAAT-box	CAAT	1347	4	-	Nicotiana glutinosa
EVM.MODEL.UTG16021.12	CAAT-box	CCAAT	1514	5	+	Arabidopsis thaliana	common cis-acting element in promoter and enhancer regions
EVM.MODEL.UTG16021.12	CAAT-box	CAAT	1515	4	+	Nicotiana glutinosa
EVM.MODEL.UTG16021.12	CAAT-box	CAAAT	1549	5	+	Pisum sativum	common cis-acting element in promoter and enhancer regions
EVM.MODEL.UTG16021.12	CAAT-box	CAAT	1552	4	-	Nicotiana glutinosa
EVM.MODEL.UTG16021.12	CAAT-box	CCAAT	1583	5	-	Arabidopsis thaliana	common cis-acting element in promoter and enhancer regions
EVM.MODEL.UTG16021.12	CAAT-box	CAAT	1616	4	+	Nicotiana glutinosa
EVM.MODEL.UTG16021.12	CAAT-box	CCAAT	1649	5	+	Arabidopsis thaliana	common cis-acting element in promoter and enhancer regions
EVM.MODEL.UTG16021.12	CAAT-box	CAAT	1650	4	+	Nicotiana glutinosa
EVM.MODEL.UTG16021.12	CAAT-box	CAAT	1656	4	-	Nicotiana glutinosa
EVM.MODEL.UTG16021.12	CAAT-box	CAAAT	1677	5	-	Pisum sativum	common cis-acting element in promoter and enhancer regions
EVM.MODEL.UTG16021.12	CAAT-box	CAAAT	1688	5	+	Pisum sativum	common cis-acting element in promoter and enhancer regions
EVM.MODEL.UTG16021.12	CAAT-box	CAAT	1746	4	+	Nicotiana glutinosa
EVM.MODEL.UTG16021.12	CAAT-box	CAAAT	1877	5	+	Pisum sativum	common cis-acting element in promoter and enhancer regions
EVM.MODEL.UTG16021.12	CAAT-box	CAAT	1910	4	+	Nicotiana glutinosa
EVM.MODEL.UTG16021.12	CAAT-box	CAAT	1943	4	+	Nicotiana glutinosa
EVM.MODEL.UTG16021.12	DRE1	ACCGAGA	1468	7	-	Zea mays
EVM.MODEL.UTG16021.12	TATA	TATAAAAT	1374	8	+	Arabidopsis thaliana
EVM.MODEL.UTG16021.12	TATA	TATAAAAT	1712	8	-	Arabidopsis thaliana
EVM.MODEL.UTG16021.12	TATC-box	TATCCCA	39	7	+	Oryza sativa	cis-acting element involved in gibberellin-responsiveness
EVM.MODEL.UTG16021.12	ARE	AAACCA	1070	6	+	Zea mays	cis-acting regulatory element essential for the anaerobic induction
EVM.MODEL.UTG16021.12	Box 4	ATTAAT	1075	6	-	Petroselinum crispum	part of a conserved DNA module involved in light responsiveness
EVM.MODEL.UTG16021.12	TCA	TCATCTTCAT	1399	9	-	Pisum sativum
EVM.MODEL.UTG16021.12	AT~TATA-box	TATATA	1381	6	-	Arabidopsis thaliana
EVM.MODEL.UTG16021.12	AT~TATA-box	TATATA	1699	6	-	Arabidopsis thaliana
EVM.MODEL.UTG16021.12	AT~TATA-box	TATATA	1701	6	-	Arabidopsis thaliana
EVM.MODEL.UTG16021.12	AT~TATA-box	TATATAAA	1714	8	-	Arabidopsis thaliana
EVM.MODEL.UTG16021.12	AT~TATA-box	TATATA	1716	6	-	Arabidopsis thaliana
EVM.MODEL.UTG16021.12	AT~TATA-box	TATATA	1718	6	-	Arabidopsis thaliana
EVM.MODEL.UTG16021.12	AT~TATA-box	TATATA	1883	6	-	Arabidopsis thaliana
EVM.MODEL.UTG16021.12	AT~TATA-box	TATATA	1885	6	-	Arabidopsis thaliana
EVM.MODEL.UTG16021.12	AT~TATA-box	TATATA	1887	6	-	Arabidopsis thaliana
EVM.MODEL.UTG16021.12	MYB	TAACCA	313	6	-	Arabidopsis thaliana
EVM.MODEL.UTG16021.12	MYB	TAACCA	1023	6	+	Arabidopsis thaliana
EVM.MODEL.UTG16021.12	MYB	CAACCA	1102	6	+	Arabidopsis thaliana
EVM.MODEL.UTG16021.12	MYB	CAACCA	1511	6	+	Arabidopsis thaliana
EVM.MODEL.UTG16021.12	MYB	CAACCA	1949	6	+	Arabidopsis thaliana
EVM.MODEL.UTG16021.12	MYB	CAACAG	1953	6	+	Arabidopsis thaliana
EVM.MODEL.UTG16021.12	MYC	CATTTG	1877	6	-	Arabidopsis thaliana
EVM.MODEL.UTG16021.12	STRE	AGGGG	1483	5	-	Arabidopsis thaliana
EVM.MODEL.UTG16021.12	Unnamed__1	CGTGG	1110	5	+	Zea mays
EVM.MODEL.UTG16021.12	Unnamed__1	CGTGG	1448	5	-	Zea mays
EVM.MODEL.UTG16021.12	Unnamed__2	AACCTAACCT	1048	9	+	Petroselinum hortense
EVM.MODEL.UTG16021.12	Unnamed__2	CCCCGG	1238	6	+	Zea mays
EVM.MODEL.UTG16021.12		motif_sequence	141	4	+	organism	short_function
EVM.MODEL.UTG16021.12		motif_sequence	260	4	-	organism	short_function
EVM.MODEL.UTG16021.12		motif_sequence	264	4	+	organism	short_function
EVM.MODEL.UTG16021.12		motif_sequence	462	4	-	organism	short_function
EVM.MODEL.UTG16021.12		motif_sequence	496	4	+	organism	short_function
EVM.MODEL.UTG16021.12		motif_sequence	591	4	-	organism	short_function
EVM.MODEL.UTG16021.12		motif_sequence	1175	4	+	organism	short_function
EVM.MODEL.UTG16021.12		motif_sequence	1310	4	-	organism	short_function
EVM.MODEL.UTG16021.12		motif_sequence	1618	4	+	organism	short_function
EVM.MODEL.UTG16021.12	ACE	CTAACGTATT	1051	9	+	Petroselinum crispum	cis-acting element involved in light responsiveness
EVM.MODEL.UTG16021.12	WRE3	CCACCT	122	6	+	Pisum sativum
EVM.MODEL.UTG16021.12	WRE3	CCACCT	418	6	-	Pisum sativum
EVM.MODEL.UTG16021.12	CGTCA-motif	CGTCA	1962	5	+	Hordeum vulgare	cis-acting regulatory element involved in the MeJA-responsiveness
EVM.MODEL.UTG16021.12	F-box	CTATTCTCATT	698	10	+	Lycopersicon esculentum
EVM.MODEL.UTG16021.13	AT~ABRE	TACGTGTC	841	8	-	Arabidopsis thaliana
EVM.MODEL.UTG16021.13	TATA-box	ATTATA	228	6	+	Brassica napus	core promoter element around -30 of transcription start
EVM.MODEL.UTG16021.13	TATA-box	TATATAA	229	7	-	Arabidopsis thaliana	core promoter element around -30 of transcription start
EVM.MODEL.UTG16021.13	TATA-box	TATATA	230	6	+	Arabidopsis thaliana	core promoter element around -30 of transcription start
EVM.MODEL.UTG16021.13	TATA-box	ATATAA	231	6	+	Brassica oleracea	core promoter element around -30 of transcription start
EVM.MODEL.UTG16021.13	TATA-box	TATA	232	4	+	Arabidopsis thaliana	core promoter element around -30 of transcription start
EVM.MODEL.UTG16021.13	TATA-box	ATATAT	250	6	+	Brassica napus	core promoter element around -30 of transcription start
EVM.MODEL.UTG16021.13	TATA-box	TATA	251	4	+	Arabidopsis thaliana	core promoter element around -30 of transcription start
EVM.MODEL.UTG16021.13	TATA-box	TATATA	332	6	+	Arabidopsis thaliana	core promoter element around -30 of transcription start
EVM.MODEL.UTG16021.13	TATA-box	ATATAT	333	6	+	Brassica napus	core promoter element around -30 of transcription start
EVM.MODEL.UTG16021.13	TATA-box	TATA	334	4	+	Arabidopsis thaliana	core promoter element around -30 of transcription start
EVM.MODEL.UTG16021.13	TATA-box	TATA	391	4	+	Arabidopsis thaliana	core promoter element around -30 of transcription start
EVM.MODEL.UTG16021.13	TATA-box	ATTATA	572	6	+	Brassica napus	core promoter element around -30 of transcription start
EVM.MODEL.UTG16021.13	TATA-box	TATAA	573	5	-	Arabidopsis thaliana	core promoter element around -30 of transcription start
EVM.MODEL.UTG16021.13	TATA-box	TATA	574	4	+	Arabidopsis thaliana	core promoter element around -30 of transcription start
EVM.MODEL.UTG16021.13	TATA-box	TATACA	777	6	-	Helianthus annuus	core promoter element around -30 of transcription start
EVM.MODEL.UTG16021.13	TATA-box	TATA	779	4	+	Arabidopsis thaliana	core promoter element around -30 of transcription start
EVM.MODEL.UTG16021.13	TATA-box	ATTATA	825	6	+	Brassica napus	core promoter element around -30 of transcription start
EVM.MODEL.UTG16021.13	TATA-box	TATAA	826	5	-	Arabidopsis thaliana	core promoter element around -30 of transcription start
EVM.MODEL.UTG16021.13	TATA-box	TATA	827	4	+	Arabidopsis thaliana	core promoter element around -30 of transcription start
EVM.MODEL.UTG16021.13	TATA-box	TATA	847	4	+	Arabidopsis thaliana	core promoter element around -30 of transcription start
EVM.MODEL.UTG16021.13	TATA-box	ATTATA	850	6	+	Brassica napus	core promoter element around -30 of transcription start
EVM.MODEL.UTG16021.13	TATA-box	TATAA	851	5	-	Arabidopsis thaliana	core promoter element around -30 of transcription start
EVM.MODEL.UTG16021.13	TATA-box	TATA	852	4	+	Arabidopsis thaliana	core promoter element around -30 of transcription start
EVM.MODEL.UTG16021.13	TATA-box	TATA	1047	4	-	Arabidopsis thaliana	core promoter element around -30 of transcription start
EVM.MODEL.UTG16021.13	TATA-box	ATTATA	1054	6	+	Brassica napus	core promoter element around -30 of transcription start
EVM.MODEL.UTG16021.13	TATA-box	TATAA	1055	5	-	Arabidopsis thaliana	core promoter element around -30 of transcription start
EVM.MODEL.UTG16021.13	TATA-box	TATA	1056	4	-	Arabidopsis thaliana	core promoter element around -30 of transcription start
EVM.MODEL.UTG16021.13	TATA-box	TATAAAT	1069	7	-	Brassica juncea	core promoter element around -30 of transcription start
EVM.MODEL.UTG16021.13	TATA-box	TATAAA	1070	6	-	Helianthus annuus	core promoter element around -30 of transcription start
EVM.MODEL.UTG16021.13	TATA-box	TATAA	1071	5	-	Arabidopsis thaliana	core promoter element around -30 of transcription start
EVM.MODEL.UTG16021.13	TATA-box	TATA	1072	4	-	Arabidopsis thaliana	core promoter element around -30 of transcription start
EVM.MODEL.UTG16021.13	TATA-box	ATATAT	1091	6	-	Brassica napus	core promoter element around -30 of transcription start
EVM.MODEL.UTG16021.13	TATA-box	TATA	1092	4	-	Arabidopsis thaliana	core promoter element around -30 of transcription start
EVM.MODEL.UTG16021.13	TATA-box	ATATAA	1332	6	+	Brassica oleracea	core promoter element around -30 of transcription start
EVM.MODEL.UTG16021.13	TATA-box	TATA	1333	4	-	Arabidopsis thaliana	core promoter element around -30 of transcription start
EVM.MODEL.UTG16021.13	TATA-box	TATAAATA	1342	8	-	Daucus carota	core promoter element around -30 of transcription start
EVM.MODEL.UTG16021.13	TATA-box	TATAAAT	1343	7	-	Brassica juncea	core promoter element around -30 of transcription start
EVM.MODEL.UTG16021.13	TATA-box	TATAAA	1344	6	-	Helianthus annuus	core promoter element around -30 of transcription start
EVM.MODEL.UTG16021.13	TATA-box	TATAA	1345	5	-	Arabidopsis thaliana	core promoter element around -30 of transcription start
EVM.MODEL.UTG16021.13	TATA-box	TATA	1346	4	-	Arabidopsis thaliana	core promoter element around -30 of transcription start
EVM.MODEL.UTG16021.13	TATA-box	TATA	1356	4	-	Arabidopsis thaliana	core promoter element around -30 of transcription start
EVM.MODEL.UTG16021.13	TATA-box	ATTATA	1427	6	+	Brassica napus	core promoter element around -30 of transcription start
EVM.MODEL.UTG16021.13	TATA-box	TATAA	1428	5	-	Arabidopsis thaliana	core promoter element around -30 of transcription start
EVM.MODEL.UTG16021.13	TATA-box	TATA	1429	4	-	Arabidopsis thaliana	core promoter element around -30 of transcription start
EVM.MODEL.UTG16021.13	TATA-box	TATA	1684	4	-	Arabidopsis thaliana	core promoter element around -30 of transcription start
EVM.MODEL.UTG16021.13	TATA-box	ATATAT	1708	6	-	Brassica napus	core promoter element around -30 of transcription start
EVM.MODEL.UTG16021.13	TATA-box	TATATA	1709	6	-	Arabidopsis thaliana	core promoter element around -30 of transcription start
EVM.MODEL.UTG16021.13	TATA-box	ATATAT	1710	6	-	Brassica napus	core promoter element around -30 of transcription start
EVM.MODEL.UTG16021.13	TATA-box	TATATA	1711	6	-	Arabidopsis thaliana	core promoter element around -30 of transcription start
EVM.MODEL.UTG16021.13	TATA-box	ATATAT	1712	6	-	Brassica napus	core promoter element around -30 of transcription start
EVM.MODEL.UTG16021.13	TATA-box	TATA	1713	4	-	Arabidopsis thaliana	core promoter element around -30 of transcription start
EVM.MODEL.UTG16021.13	TATA-box	TATAAAA	1723	7	-	Pisum sativum	core promoter element around -30 of transcription start
EVM.MODEL.UTG16021.13	TATA-box	TATAAA	1724	6	-	Helianthus annuus	core promoter element around -30 of transcription start
EVM.MODEL.UTG16021.13	TATA-box	TATATAA	1725	7	-	Arabidopsis thaliana	core promoter element around -30 of transcription start
EVM.MODEL.UTG16021.13	TATA-box	TATATA	1726	6	-	Arabidopsis thaliana	core promoter element around -30 of transcription start
EVM.MODEL.UTG16021.13	TATA-box	ATATAT	1727	6	-	Brassica napus	core promoter element around -30 of transcription start
EVM.MODEL.UTG16021.13	TATA-box	TATATA	1728	6	-	Arabidopsis thaliana	core promoter element around -30 of transcription start
EVM.MODEL.UTG16021.13	TATA-box	TATA	1730	4	-	Arabidopsis thaliana	core promoter element around -30 of transcription start
EVM.MODEL.UTG16021.13	TATA-box	TATA	1765	4	-	Arabidopsis thaliana	core promoter element around -30 of transcription start
EVM.MODEL.UTG16021.13	TATA-box	TACAAAA	1787	7	+	Oryza sativa	core promoter element around -30 of transcription start
EVM.MODEL.UTG16021.13	TATA-box	TATACA	1882	6	-	Helianthus annuus	core promoter element around -30 of transcription start
EVM.MODEL.UTG16021.13	TATA-box	TATATA	1884	6	-	Arabidopsis thaliana	core promoter element around -30 of transcription start
EVM.MODEL.UTG16021.13	TATA-box	ATATAT	1885	6	-	Brassica napus	core promoter element around -30 of transcription start
EVM.MODEL.UTG16021.13	TATA-box	TATATA	1886	6	-	Arabidopsis thaliana	core promoter element around -30 of transcription start
EVM.MODEL.UTG16021.13	TATA-box	ATATAT	1887	6	-	Brassica napus	core promoter element around -30 of transcription start
EVM.MODEL.UTG16021.13	TATA-box	TATATA	1888	6	-	Arabidopsis thaliana	core promoter element around -30 of transcription start
EVM.MODEL.UTG16021.13	TATA-box	TATA	1890	4	-	Arabidopsis thaliana	core promoter element around -30 of transcription start
EVM.MODEL.UTG16021.13	TATA-box	TATA	2019	4	-	Arabidopsis thaliana	core promoter element around -30 of transcription start
EVM.MODEL.UTG16021.13	TGACG-motif	TGACG	1963	5	-	Hordeum vulgare	cis-acting regulatory element involved in the MeJA-responsiveness
EVM.MODEL.UTG16021.13	as-1	TGACG	1963	5	-	Arabidopsis thaliana
EVM.MODEL.UTG16021.13	Myb-binding site	CAACAG	1954	6	+	Nicotiana tabacum
EVM.MODEL.UTG16021.13	G-box	TACGTG	843	6	-	Arabidopsis thaliana	cis-acting regulatory element involved in light responsiveness
EVM.MODEL.UTG16021.13	Unnamed__4	CTCC	127	4	-	Petroselinum hortense
EVM.MODEL.UTG16021.13	Unnamed__4	CTCC	162	4	+	Petroselinum hortense
EVM.MODEL.UTG16021.13	Unnamed__4	CTCC	165	4	+	Petroselinum hortense
EVM.MODEL.UTG16021.13	Unnamed__4	CTCC	210	4	-	Petroselinum hortense
EVM.MODEL.UTG16021.13	Unnamed__4	CTCC	1514	4	-	Petroselinum hortense
EVM.MODEL.UTG16021.13	Unnamed__4	CTCC	1518	4	+	Petroselinum hortense
EVM.MODEL.UTG16021.13	Unnamed__4	CTCC	1545	4	-	Petroselinum hortense
EVM.MODEL.UTG16021.13	Unnamed__4	CTCC	1596	4	+	Petroselinum hortense
EVM.MODEL.UTG16021.13	Unnamed__4	CTCC	1851	4	+	Petroselinum hortense
EVM.MODEL.UTG16021.13	Unnamed__4	CTCC	1874	4	+	Petroselinum hortense
EVM.MODEL.UTG16021.13	CCAAT-box	CAACGG	557	6	-	Hordeum vulgare	MYBHv1 binding site
EVM.MODEL.UTG16021.13	GT1-motif	GGTTAA	1005	6	+	Arabidopsis thaliana	light responsive element
EVM.MODEL.UTG16021.13	GT1-motif	GGTTAA	1645	6	-	Arabidopsis thaliana	light responsive element
EVM.MODEL.UTG16021.13	GT1-motif	GGTTAA	1826	6	+	Arabidopsis thaliana	light responsive element
EVM.MODEL.UTG16021.13	chs-CMA1a	TTACTTAA	1839	8	+	Daucus carota	part of a light responsive element
EVM.MODEL.UTG16021.13	ABRE	TACGTGTC	841	8	-	Oryza sativa	cis-acting element involved in the abscisic acid responsiveness
EVM.MODEL.UTG16021.13	ABRE	ACGTG	843	5	-	Arabidopsis thaliana	cis-acting element involved in the abscisic acid responsiveness
EVM.MODEL.UTG16021.13	MYB recognition site	CCGTTG	557	6	+	Arabidopsis thaliana
EVM.MODEL.UTG16021.13	Myb	TAACTG	611	6	-	Arabidopsis thaliana
EVM.MODEL.UTG16021.13	MYB	CAACCA	1950	6	+	Arabidopsis thaliana
EVM.MODEL.UTG16021.13	MYB	CAACAG	1954	6	+	Arabidopsis thaliana
EVM.MODEL.UTG16021.13	ABRE3a	TACGTG	843	6	-	Zea mays
EVM.MODEL.UTG16021.13	MYC	CATGTG	271	6	-	Arabidopsis thaliana
EVM.MODEL.UTG16021.13	MYC	CATGTG	482	6	+	Arabidopsis thaliana
EVM.MODEL.UTG16021.13	MYC	CATTTG	743	6	-	Arabidopsis thaliana
EVM.MODEL.UTG16021.13	MYC	CATGTG	1163	6	+	Arabidopsis thaliana
EVM.MODEL.UTG16021.13	MYC	CAATTG	1171	6	-	Arabidopsis thaliana
EVM.MODEL.UTG16021.13	MYC	CATTTG	1878	6	-	Arabidopsis thaliana
EVM.MODEL.UTG16021.13	STRE	AGGGG	634	5	+	Arabidopsis thaliana
EVM.MODEL.UTG16021.13	ABRE4	CACGTA	843	6	+	Zea mays
EVM.MODEL.UTG16021.13	AT~TATA-box	TATATA	230	6	+	Arabidopsis thaliana
EVM.MODEL.UTG16021.13	AT~TATA-box	TATATA	332	6	+	Arabidopsis thaliana
EVM.MODEL.UTG16021.13	AT~TATA-box	TATATA	1709	6	-	Arabidopsis thaliana
EVM.MODEL.UTG16021.13	AT~TATA-box	TATATA	1711	6	-	Arabidopsis thaliana
EVM.MODEL.UTG16021.13	AT~TATA-box	TATATAAA	1724	8	-	Arabidopsis thaliana
EVM.MODEL.UTG16021.13	AT~TATA-box	TATATA	1726	6	-	Arabidopsis thaliana
EVM.MODEL.UTG16021.13	AT~TATA-box	TATATA	1728	6	-	Arabidopsis thaliana
EVM.MODEL.UTG16021.13	AT~TATA-box	TATATA	1884	6	-	Arabidopsis thaliana
EVM.MODEL.UTG16021.13	AT~TATA-box	TATATA	1886	6	-	Arabidopsis thaliana
EVM.MODEL.UTG16021.13	AT~TATA-box	TATATA	1888	6	-	Arabidopsis thaliana
EVM.MODEL.UTG16021.13	ARE	AAACCA	1659	6	-	Zea mays	cis-acting regulatory element essential for the anaerobic induction
EVM.MODEL.UTG16021.13	Box 4	ATTAAT	198	6	+	Petroselinum crispum	part of a conserved DNA module involved in light responsiveness
EVM.MODEL.UTG16021.13	Box 4	ATTAAT	254	6	+	Petroselinum crispum	part of a conserved DNA module involved in light responsiveness
EVM.MODEL.UTG16021.13	Box 4	ATTAAT	1042	6	-	Petroselinum crispum	part of a conserved DNA module involved in light responsiveness
EVM.MODEL.UTG16021.13	Box 4	ATTAAT	1084	6	-	Petroselinum crispum	part of a conserved DNA module involved in light responsiveness
EVM.MODEL.UTG16021.13	Box 4	ATTAAT	1434	6	-	Petroselinum crispum	part of a conserved DNA module involved in light responsiveness
EVM.MODEL.UTG16021.13	TCA	TCATCTTCAT	579	9	+	Pisum sativum
EVM.MODEL.UTG16021.13	TCA-element	TCAGAAGAGG	355	9	+	Brassica oleracea	cis-acting element involved in salicylic acid responsiveness
EVM.MODEL.UTG16021.13	CAAT-box	CAAT	170	4	+	Nicotiana glutinosa
EVM.MODEL.UTG16021.13	CAAT-box	CAAT	349	4	+	Nicotiana glutinosa
EVM.MODEL.UTG16021.13	CAAT-box	CAAAT	375	5	+	Pisum sativum	common cis-acting element in promoter and enhancer regions
EVM.MODEL.UTG16021.13	CAAT-box	CAAAT	430	5	+	Pisum sativum	common cis-acting element in promoter and enhancer regions
EVM.MODEL.UTG16021.13	CAAT-box	CAAAT	521	5	+	Pisum sativum	common cis-acting element in promoter and enhancer regions
EVM.MODEL.UTG16021.13	CAAT-box	CAAAT	536	5	+	Pisum sativum	common cis-acting element in promoter and enhancer regions
EVM.MODEL.UTG16021.13	CAAT-box	CAAAT	603	5	+	Pisum sativum	common cis-acting element in promoter and enhancer regions
EVM.MODEL.UTG16021.13	CAAT-box	CAAAT	683	5	+	Pisum sativum	common cis-acting element in promoter and enhancer regions
EVM.MODEL.UTG16021.13	CAAT-box	CCAAT	700	5	-	Arabidopsis thaliana	common cis-acting element in promoter and enhancer regions
EVM.MODEL.UTG16021.13	CAAT-box	CAAAT	743	5	+	Pisum sativum	common cis-acting element in promoter and enhancer regions
EVM.MODEL.UTG16021.13	CAAT-box	CAAT	771	4	+	Nicotiana glutinosa
EVM.MODEL.UTG16021.13	CAAT-box	CAAAT	905	5	-	Pisum sativum	common cis-acting element in promoter and enhancer regions
EVM.MODEL.UTG16021.13	CAAT-box	CAAAT	918	5	-	Pisum sativum	common cis-acting element in promoter and enhancer regions
EVM.MODEL.UTG16021.13	CAAT-box	CAAT	1011	4	-	Nicotiana glutinosa
EVM.MODEL.UTG16021.13	CAAT-box	CAAAT	1022	5	-	Pisum sativum	common cis-acting element in promoter and enhancer regions
EVM.MODEL.UTG16021.13	CAAT-box	CAAAT	1028	5	-	Pisum sativum	common cis-acting element in promoter and enhancer regions
EVM.MODEL.UTG16021.13	CAAT-box	CAAT	1033	4	+	Nicotiana glutinosa
EVM.MODEL.UTG16021.13	CAAT-box	CAAAT	1035	5	-	Pisum sativum	common cis-acting element in promoter and enhancer regions
EVM.MODEL.UTG16021.13	CAAT-box	CAAT	1095	4	-	Nicotiana glutinosa
EVM.MODEL.UTG16021.13	CAAT-box	CAAT	1102	4	-	Nicotiana glutinosa
EVM.MODEL.UTG16021.13	CAAT-box	CCAAT	1170	5	+	Arabidopsis thaliana	common cis-acting element in promoter and enhancer regions
EVM.MODEL.UTG16021.13	CAAT-box	CAAT	1171	4	+	Nicotiana glutinosa
EVM.MODEL.UTG16021.13	CAAT-box	CAAT	1173	4	-	Nicotiana glutinosa
EVM.MODEL.UTG16021.13	CAAT-box	CAAT	1251	4	+	Nicotiana glutinosa
EVM.MODEL.UTG16021.13	CAAT-box	CAAAT	1286	5	-	Pisum sativum	common cis-acting element in promoter and enhancer regions
EVM.MODEL.UTG16021.13	CAAT-box	CAAAT	1294	5	-	Pisum sativum	common cis-acting element in promoter and enhancer regions
EVM.MODEL.UTG16021.13	CAAT-box	CAAAT	1309	5	+	Pisum sativum	common cis-acting element in promoter and enhancer regions
EVM.MODEL.UTG16021.13	CAAT-box	CAAT	1351	4	-	Nicotiana glutinosa
EVM.MODEL.UTG16021.13	CAAT-box	CAAT	1373	4	+	Nicotiana glutinosa
EVM.MODEL.UTG16021.13	CAAT-box	CAAT	1390	4	-	Nicotiana glutinosa
EVM.MODEL.UTG16021.13	CAAT-box	CAAAT	1409	5	-	Pisum sativum	common cis-acting element in promoter and enhancer regions
EVM.MODEL.UTG16021.13	CAAT-box	CAAT	1507	4	-	Nicotiana glutinosa
EVM.MODEL.UTG16021.13	CAAT-box	CAAAT	1535	5	-	Pisum sativum	common cis-acting element in promoter and enhancer regions
EVM.MODEL.UTG16021.13	CAAT-box	CAAT	1552	4	+	Nicotiana glutinosa
EVM.MODEL.UTG16021.13	CAAT-box	CAAT	1640	4	-	Nicotiana glutinosa
EVM.MODEL.UTG16021.13	CAAT-box	CAAT	1666	4	-	Nicotiana glutinosa
EVM.MODEL.UTG16021.13	CAAT-box	CAAAT	1687	5	-	Pisum sativum	common cis-acting element in promoter and enhancer regions
EVM.MODEL.UTG16021.13	CAAT-box	CAAAT	1698	5	+	Pisum sativum	common cis-acting element in promoter and enhancer regions
EVM.MODEL.UTG16021.13	CAAT-box	CAAT	1735	4	-	Nicotiana glutinosa
EVM.MODEL.UTG16021.13	CAAT-box	CAAT	1759	4	+	Nicotiana glutinosa
EVM.MODEL.UTG16021.13	CAAT-box	CAAAT	1878	5	+	Pisum sativum	common cis-acting element in promoter and enhancer regions
EVM.MODEL.UTG16021.13	CAAT-box	CAAT	1911	4	+	Nicotiana glutinosa
EVM.MODEL.UTG16021.13	CAAT-box	CAAT	1944	4	+	Nicotiana glutinosa
EVM.MODEL.UTG16021.13	TATA	TATAAAAT	1722	8	-	Arabidopsis thaliana
EVM.MODEL.UTG16021.13	RY-element	CATGCATG	24	8	+	Helianthus annuus	cis-acting regulatory element involved in seed-specific regulation
EVM.MODEL.UTG16021.13	ACE	GACACGTATG	841	9	+	Petroselinum crispum	cis-acting element involved in light responsiveness
EVM.MODEL.UTG16021.13	CGTCA-motif	CGTCA	1963	5	+	Hordeum vulgare	cis-acting regulatory element involved in the MeJA-responsiveness
EVM.MODEL.UTG16021.13		motif_sequence	64	4	-	organism	short_function
EVM.MODEL.UTG16021.13		motif_sequence	98	4	+	organism	short_function
EVM.MODEL.UTG16021.13		motif_sequence	117	4	+	organism	short_function
EVM.MODEL.UTG16021.13		motif_sequence	483	4	+	organism	short_function
EVM.MODEL.UTG16021.13		motif_sequence	581	4	+	organism	short_function
EVM.MODEL.UTG16021.13		motif_sequence	812	4	-	organism	short_function
EVM.MODEL.UTG16021.13		motif_sequence	884	4	-	organism	short_function
EVM.MODEL.UTG16021.13		motif_sequence	1221	4	-	organism	short_function
EVM.MODEL.UTG16021.13		motif_sequence	1241	4	-	organism	short_function
EVM.MODEL.UTG16021.13		motif_sequence	1256	4	-	organism	short_function
EVM.MODEL.UTG16021.13		motif_sequence	1580	4	+	organism	short_function
EVM.MODEL.UTG16021.13		motif_sequence	1594	4	+	organism	short_function
EVM.MODEL.UTG16021.13	TCT-motif	TCTTAC	837	6	-	Arabidopsis thaliana	part of a light responsive element
EVM.MODEL.UTG19621.11	G-box	CACGTG	1765	6	-	Arabidopsis thaliana	cis-acting regulatory element involved in light responsiveness
EVM.MODEL.UTG19621.11	G-Box	CACGTG	1765	6	-	Pisum sativum	cis-acting regulatory element involved in light responsiveness
EVM.MODEL.UTG19621.11	as-1	TGACG	444	5	+	Arabidopsis thaliana
EVM.MODEL.UTG19621.11	as-1	TGACG	447	5	-	Arabidopsis thaliana
EVM.MODEL.UTG19621.11	TGACG-motif	TGACG	444	5	+	Hordeum vulgare	cis-acting regulatory element involved in the MeJA-responsiveness
EVM.MODEL.UTG19621.11	TGACG-motif	TGACG	447	5	-	Hordeum vulgare	cis-acting regulatory element involved in the MeJA-responsiveness
EVM.MODEL.UTG19621.11	TATA-box	ATTATA	92	6	+	Brassica napus	core promoter element around -30 of transcription start
EVM.MODEL.UTG19621.11	TATA-box	TATATAA	93	7	-	Arabidopsis thaliana	core promoter element around -30 of transcription start
EVM.MODEL.UTG19621.11	TATA-box	TATATA	94	6	+	Arabidopsis thaliana	core promoter element around -30 of transcription start
EVM.MODEL.UTG19621.11	TATA-box	ATATAT	95	6	+	Brassica napus	core promoter element around -30 of transcription start
EVM.MODEL.UTG19621.11	TATA-box	TATA	96	4	+	Arabidopsis thaliana	core promoter element around -30 of transcription start
EVM.MODEL.UTG19621.11	TATA-box	TATACA	184	6	-	Helianthus annuus	core promoter element around -30 of transcription start
EVM.MODEL.UTG19621.11	TATA-box	TATA	186	4	+	Arabidopsis thaliana	core promoter element around -30 of transcription start
EVM.MODEL.UTG19621.11	TATA-box	TATA	200	4	+	Arabidopsis thaliana	core promoter element around -30 of transcription start
EVM.MODEL.UTG19621.11	TATA-box	TATAA	217	5	-	Arabidopsis thaliana	core promoter element around -30 of transcription start
EVM.MODEL.UTG19621.11	TATA-box	TATA	218	4	+	Arabidopsis thaliana	core promoter element around -30 of transcription start
EVM.MODEL.UTG19621.11	TATA-box	taTATAAAg	344	9	-	Lycopersicon esculentum	core promoter element around -30 of transcription start
EVM.MODEL.UTG19621.11	TATA-box	TATAAA	345	6	-	Helianthus annuus	core promoter element around -30 of transcription start
EVM.MODEL.UTG19621.11	TATA-box	TATATAA	346	7	-	Arabidopsis thaliana	core promoter element around -30 of transcription start
EVM.MODEL.UTG19621.11	TATA-box	TATATA	347	6	+	Arabidopsis thaliana	core promoter element around -30 of transcription start
EVM.MODEL.UTG19621.11	TATA-box	ATATAT	348	6	+	Brassica napus	core promoter element around -30 of transcription start
EVM.MODEL.UTG19621.11	TATA-box	TATA	349	4	+	Arabidopsis thaliana	core promoter element around -30 of transcription start
EVM.MODEL.UTG19621.11	TATA-box	TATATA	374	6	+	Arabidopsis thaliana	core promoter element around -30 of transcription start
EVM.MODEL.UTG19621.11	TATA-box	ATATAT	375	6	+	Brassica napus	core promoter element around -30 of transcription start
EVM.MODEL.UTG19621.11	TATA-box	TATATA	376	6	+	Arabidopsis thaliana	core promoter element around -30 of transcription start
EVM.MODEL.UTG19621.11	TATA-box	ATATAT	377	6	+	Brassica napus	core promoter element around -30 of transcription start
EVM.MODEL.UTG19621.11	TATA-box	TATA	378	4	+	Arabidopsis thaliana	core promoter element around -30 of transcription start
EVM.MODEL.UTG19621.11	TATA-box	TATAAAA	421	7	-	Pisum sativum	core promoter element around -30 of transcription start
EVM.MODEL.UTG19621.11	TATA-box	TATAAA	422	6	-	Helianthus annuus	core promoter element around -30 of transcription start
EVM.MODEL.UTG19621.11	TATA-box	TATAA	423	5	-	Arabidopsis thaliana	core promoter element around -30 of transcription start
EVM.MODEL.UTG19621.11	TATA-box	TATA	424	4	+	Arabidopsis thaliana	core promoter element around -30 of transcription start
EVM.MODEL.UTG19621.11	TATA-box	TACAAAA	428	7	-	Oryza sativa	core promoter element around -30 of transcription start
EVM.MODEL.UTG19621.11	TATA-box	TATACA	431	6	-	Helianthus annuus	core promoter element around -30 of transcription start
EVM.MODEL.UTG19621.11	TATA-box	TATATA	433	6	+	Arabidopsis thaliana	core promoter element around -30 of transcription start
EVM.MODEL.UTG19621.11	TATA-box	ATATAT	434	6	+	Brassica napus	core promoter element around -30 of transcription start
EVM.MODEL.UTG19621.11	TATA-box	TATA	435	4	+	Arabidopsis thaliana	core promoter element around -30 of transcription start
EVM.MODEL.UTG19621.11	TATA-box	TATAAAA	547	7	-	Pisum sativum	core promoter element around -30 of transcription start
EVM.MODEL.UTG19621.11	TATA-box	TATAAA	548	6	-	Helianthus annuus	core promoter element around -30 of transcription start
EVM.MODEL.UTG19621.11	TATA-box	TATAA	549	5	-	Arabidopsis thaliana	core promoter element around -30 of transcription start
EVM.MODEL.UTG19621.11	TATA-box	TATA	550	4	+	Arabidopsis thaliana	core promoter element around -30 of transcription start
EVM.MODEL.UTG19621.11	TATA-box	ATTATA	626	6	+	Brassica napus	core promoter element around -30 of transcription start
EVM.MODEL.UTG19621.11	TATA-box	TATAA	627	5	-	Arabidopsis thaliana	core promoter element around -30 of transcription start
EVM.MODEL.UTG19621.11	TATA-box	TATA	628	4	+	Arabidopsis thaliana	core promoter element around -30 of transcription start
EVM.MODEL.UTG19621.11	TATA-box	taTATAAAtc	639	9	-	Arabidopsis thaliana	core promoter element around -30 of transcription start
EVM.MODEL.UTG19621.11	TATA-box	TATAAAT	640	7	-	Brassica juncea	core promoter element around -30 of transcription start
EVM.MODEL.UTG19621.11	TATA-box	TATAAA	641	6	-	Helianthus annuus	core promoter element around -30 of transcription start
EVM.MODEL.UTG19621.11	TATA-box	TATATAA	642	7	-	Arabidopsis thaliana	core promoter element around -30 of transcription start
EVM.MODEL.UTG19621.11	TATA-box	TATATA	643	6	+	Arabidopsis thaliana	core promoter element around -30 of transcription start
EVM.MODEL.UTG19621.11	TATA-box	ATATAT	644	6	+	Brassica napus	core promoter element around -30 of transcription start
EVM.MODEL.UTG19621.11	TATA-box	TATA	645	4	+	Arabidopsis thaliana	core promoter element around -30 of transcription start
EVM.MODEL.UTG19621.11	TATA-box	ATTATA	648	6	+	Brassica napus	core promoter element around -30 of transcription start
EVM.MODEL.UTG19621.11	TATA-box	TATAA	649	5	-	Arabidopsis thaliana	core promoter element around -30 of transcription start
EVM.MODEL.UTG19621.11	TATA-box	TATA	650	4	+	Arabidopsis thaliana	core promoter element around -30 of transcription start
EVM.MODEL.UTG19621.11	TATA-box	TATATAA	655	7	-	Arabidopsis thaliana	core promoter element around -30 of transcription start
EVM.MODEL.UTG19621.11	TATA-box	TATATA	656	6	+	Arabidopsis thaliana	core promoter element around -30 of transcription start
EVM.MODEL.UTG19621.11	TATA-box	ATATAT	657	6	+	Brassica napus	core promoter element around -30 of transcription start
EVM.MODEL.UTG19621.11	TATA-box	TATA	658	4	+	Arabidopsis thaliana	core promoter element around -30 of transcription start
EVM.MODEL.UTG19621.11	TATA-box	taTATAAAtc	780	9	-	Arabidopsis thaliana	core promoter element around -30 of transcription start
EVM.MODEL.UTG19621.11	TATA-box	TATATA	784	6	+	Arabidopsis thaliana	core promoter element around -30 of transcription start
EVM.MODEL.UTG19621.11	TATA-box	ATATAT	785	6	+	Brassica napus	core promoter element around -30 of transcription start
EVM.MODEL.UTG19621.11	TATA-box	TATA	786	4	+	Arabidopsis thaliana	core promoter element around -30 of transcription start
EVM.MODEL.UTG19621.11	TATA-box	ATATAA	906	6	+	Brassica oleracea	core promoter element around -30 of transcription start
EVM.MODEL.UTG19621.11	TATA-box	TATA	907	4	+	Arabidopsis thaliana	core promoter element around -30 of transcription start
EVM.MODEL.UTG19621.11	TATA-box	TATATAA	956	7	-	Arabidopsis thaliana	core promoter element around -30 of transcription start
EVM.MODEL.UTG19621.11	TATA-box	TATATA	957	6	+	Arabidopsis thaliana	core promoter element around -30 of transcription start
EVM.MODEL.UTG19621.11	TATA-box	ATATAT	958	6	+	Brassica napus	core promoter element around -30 of transcription start
EVM.MODEL.UTG19621.11	TATA-box	TATA	959	4	+	Arabidopsis thaliana	core promoter element around -30 of transcription start
EVM.MODEL.UTG19621.11	TATA-box	TATAAA	965	6	-	Helianthus annuus	core promoter element around -30 of transcription start
EVM.MODEL.UTG19621.11	TATA-box	TATAA	966	5	-	Arabidopsis thaliana	core promoter element around -30 of transcription start
EVM.MODEL.UTG19621.11	TATA-box	TATA	967	4	+	Arabidopsis thaliana	core promoter element around -30 of transcription start
EVM.MODEL.UTG19621.11	TATA-box	TATAAAA	1210	7	-	Pisum sativum	core promoter element around -30 of transcription start
EVM.MODEL.UTG19621.11	TATA-box	TATAAA	1211	6	-	Helianthus annuus	core promoter element around -30 of transcription start
EVM.MODEL.UTG19621.11	TATA-box	TATAA	1212	5	-	Arabidopsis thaliana	core promoter element around -30 of transcription start
EVM.MODEL.UTG19621.11	TATA-box	TATA	1213	4	-	Arabidopsis thaliana	core promoter element around -30 of transcription start
EVM.MODEL.UTG19621.11	TATA-box	TATAA	1262	5	-	Arabidopsis thaliana	core promoter element around -30 of transcription start
EVM.MODEL.UTG19621.11	TATA-box	TATA	1263	4	-	Arabidopsis thaliana	core promoter element around -30 of transcription start
EVM.MODEL.UTG19621.11	TATA-box	TATTTAAA	1298	8	+	Arabidopsis thaliana	core promoter element around -30 of transcription start
EVM.MODEL.UTG19621.11	TATA-box	TATTTAAA	1300	8	-	Arabidopsis thaliana	core promoter element around -30 of transcription start
EVM.MODEL.UTG19621.11	TATA-box	ATTATA	1364	6	+	Brassica napus	core promoter element around -30 of transcription start
EVM.MODEL.UTG19621.11	TATA-box	TATAA	1365	5	-	Arabidopsis thaliana	core promoter element around -30 of transcription start
EVM.MODEL.UTG19621.11	TATA-box	TATA	1366	4	-	Arabidopsis thaliana	core promoter element around -30 of transcription start
EVM.MODEL.UTG19621.11	TATA-box	TACAAAA	1378	7	+	Oryza sativa	core promoter element around -30 of transcription start
EVM.MODEL.UTG19621.11	TATA-box	ATTATA	1393	6	+	Brassica napus	core promoter element around -30 of transcription start
EVM.MODEL.UTG19621.11	TATA-box	TATAA	1394	5	-	Arabidopsis thaliana	core promoter element around -30 of transcription start
EVM.MODEL.UTG19621.11	TATA-box	TATA	1395	4	-	Arabidopsis thaliana	core promoter element around -30 of transcription start
EVM.MODEL.UTG19621.11	TATA-box	TATA	1473	4	-	Arabidopsis thaliana	core promoter element around -30 of transcription start
EVM.MODEL.UTG19621.11	TATA-box	TATAA	1575	5	-	Arabidopsis thaliana	core promoter element around -30 of transcription start
EVM.MODEL.UTG19621.11	TATA-box	TATA	1576	4	-	Arabidopsis thaliana	core promoter element around -30 of transcription start
EVM.MODEL.UTG19621.11	TATA-box	ATTATA	1592	6	+	Brassica napus	core promoter element around -30 of transcription start
EVM.MODEL.UTG19621.11	TATA-box	TATAA	1593	5	-	Arabidopsis thaliana	core promoter element around -30 of transcription start
EVM.MODEL.UTG19621.11	TATA-box	TATA	1594	4	-	Arabidopsis thaliana	core promoter element around -30 of transcription start
EVM.MODEL.UTG19621.11	TATA-box	ATATAT	1655	6	-	Brassica napus	core promoter element around -30 of transcription start
EVM.MODEL.UTG19621.11	TATA-box	TATA	1656	4	-	Arabidopsis thaliana	core promoter element around -30 of transcription start
EVM.MODEL.UTG19621.11	TATA-box	taTATAAAtc	1671	9	-	Arabidopsis thaliana	core promoter element around -30 of transcription start
EVM.MODEL.UTG19621.11	TATA-box	TATAAAA	1672	7	-	Pisum sativum	core promoter element around -30 of transcription start
EVM.MODEL.UTG19621.11	TATA-box	TATAAA	1673	6	-	Helianthus annuus	core promoter element around -30 of transcription start
EVM.MODEL.UTG19621.11	TATA-box	TATATAA	1674	7	-	Arabidopsis thaliana	core promoter element around -30 of transcription start
EVM.MODEL.UTG19621.11	TATA-box	TATATA	1675	6	-	Arabidopsis thaliana	core promoter element around -30 of transcription start
EVM.MODEL.UTG19621.11	TATA-box	ATATAA	1676	6	+	Brassica oleracea	core promoter element around -30 of transcription start
EVM.MODEL.UTG19621.11	TATA-box	TATA	1677	4	-	Arabidopsis thaliana	core promoter element around -30 of transcription start
EVM.MODEL.UTG19621.11	TATA-box	TATA	1772	4	-	Arabidopsis thaliana	core promoter element around -30 of transcription start
EVM.MODEL.UTG19621.11	TATA-box	ATATAT	1933	6	-	Brassica napus	core promoter element around -30 of transcription start
EVM.MODEL.UTG19621.11	TATA-box	TATATA	1934	6	-	Arabidopsis thaliana	core promoter element around -30 of transcription start
EVM.MODEL.UTG19621.11	TATA-box	ATATAA	1935	6	+	Brassica oleracea	core promoter element around -30 of transcription start
EVM.MODEL.UTG19621.11	TATA-box	TATA	1936	4	-	Arabidopsis thaliana	core promoter element around -30 of transcription start
EVM.MODEL.UTG19621.11	TATA-box	TAAAGATT	1994	8	+	Arabidopsis thaliana	core promoter element around -30 of transcription start
EVM.MODEL.UTG19621.11	AT-rich element	ATAGAAATCAA	1602	10	+	Glycine max	binding site of AT-rich DNA binding protein (ATBP-1)
EVM.MODEL.UTG19621.11	TC-rich repeats	GTTTTCTTAC	223	9	-	Nicotiana tabacum	cis-acting element involved in defense and stress responsiveness
EVM.MODEL.UTG19621.11	LTR	CCGAAA	728	6	-	Hordeum vulgare	cis-acting element involved in low-temperature responsiveness
EVM.MODEL.UTG19621.11	LTR	CCGAAA	1863	6	-	Hordeum vulgare	cis-acting element involved in low-temperature responsiveness
EVM.MODEL.UTG19621.11	ABRE	CACGTG	1765	6	-	Arabidopsis thaliana	cis-acting element involved in the abscisic acid responsiveness
EVM.MODEL.UTG19621.11	ABRE	ACGTG	1766	5	+	Arabidopsis thaliana	cis-acting element involved in the abscisic acid responsiveness
EVM.MODEL.UTG19621.11	GT1-motif	GGTTAAT	1292	7	+	Avena sativa	light responsive element
EVM.MODEL.UTG19621.11	MYB-like sequence	TAACCA	24	6	-	Arabidopsis thaliana
EVM.MODEL.UTG19621.11	MYB-like sequence	TAACCA	742	6	-	Arabidopsis thaliana
EVM.MODEL.UTG19621.11	MYB-like sequence	TAACCA	1291	6	-	Arabidopsis thaliana
EVM.MODEL.UTG19621.11	WUN-motif	AAATTTCTT	1529	9	-	Nicotiana glutinosa
EVM.MODEL.UTG19621.11	MBS	CAACTG	143	6	-	Arabidopsis thaliana	MYB binding site involved in drought-inducibility
EVM.MODEL.UTG19621.11	DRE core	GCCGAC	1789	6	-	Arabidopsis thaliana
EVM.MODEL.UTG19621.11	AAGAA-motif	GAAAGAA	241	7	-	Avena sativa
EVM.MODEL.UTG19621.11	AAGAA-motif	GAAAGAA	918	7	+	Avena sativa
EVM.MODEL.UTG19621.11	Unnamed__4	CTCC	339	4	+	Petroselinum hortense
EVM.MODEL.UTG19621.11	Unnamed__4	CTCC	710	4	-	Petroselinum hortense
EVM.MODEL.UTG19621.11	Unnamed__4	CTCC	821	4	-	Petroselinum hortense
EVM.MODEL.UTG19621.11	Unnamed__4	CTCC	1629	4	+	Petroselinum hortense
EVM.MODEL.UTG19621.11	Unnamed__4	CTCC	1849	4	+	Petroselinum hortense
EVM.MODEL.UTG19621.11	Unnamed__4	CTCC	1876	4	+	Petroselinum hortense
EVM.MODEL.UTG19621.11	Unnamed__4	CTCC	1898	4	+	Petroselinum hortense
EVM.MODEL.UTG19621.11	W box	TTGACC	1706	6	+	Arabidopsis thaliana
EVM.MODEL.UTG19621.11	W box	TTGACC	1744	6	+	Arabidopsis thaliana
EVM.MODEL.UTG19621.11	CAAT-box	CAAT	68	4	-	Nicotiana glutinosa
EVM.MODEL.UTG19621.11	CAAT-box	CAAT	88	4	-	Nicotiana glutinosa
EVM.MODEL.UTG19621.11	CAAT-box	CAAAT	108	5	-	Pisum sativum	common cis-acting element in promoter and enhancer regions
EVM.MODEL.UTG19621.11	CAAT-box	CAAAT	131	5	-	Pisum sativum	common cis-acting element in promoter and enhancer regions
EVM.MODEL.UTG19621.11	CAAT-box	CAAAT	211	5	+	Pisum sativum	common cis-acting element in promoter and enhancer regions
EVM.MODEL.UTG19621.11	CAAT-box	CAAT	279	4	+	Nicotiana glutinosa
EVM.MODEL.UTG19621.11	CAAT-box	CAAAT	294	5	-	Pisum sativum	common cis-acting element in promoter and enhancer regions
EVM.MODEL.UTG19621.11	CAAT-box	CAAAT	441	5	-	Pisum sativum	common cis-acting element in promoter and enhancer regions
EVM.MODEL.UTG19621.11	CAAT-box	CAAT	450	4	+	Nicotiana glutinosa
EVM.MODEL.UTG19621.11	CAAT-box	CAAAT	736	5	+	Pisum sativum	common cis-acting element in promoter and enhancer regions
EVM.MODEL.UTG19621.11	CAAT-box	CAAT	747	4	-	Nicotiana glutinosa
EVM.MODEL.UTG19621.11	CAAT-box	CAAT	794	4	-	Nicotiana glutinosa
EVM.MODEL.UTG19621.11	CAAT-box	CAAT	799	4	+	Nicotiana glutinosa
EVM.MODEL.UTG19621.11	CAAT-box	CCAAT	845	5	-	Arabidopsis thaliana	common cis-acting element in promoter and enhancer regions
EVM.MODEL.UTG19621.11	CAAT-box	CAAT	886	4	-	Nicotiana glutinosa
EVM.MODEL.UTG19621.11	CAAT-box	CAAT	982	4	-	Nicotiana glutinosa
EVM.MODEL.UTG19621.11	CAAT-box	CAAT	1047	4	-	Nicotiana glutinosa
EVM.MODEL.UTG19621.11	CAAT-box	CAAT	1100	4	-	Nicotiana glutinosa
EVM.MODEL.UTG19621.11	CAAT-box	CAAAT	1236	5	-	Pisum sativum	common cis-acting element in promoter and enhancer regions
EVM.MODEL.UTG19621.11	CAAT-box	CAAAT	1255	5	+	Pisum sativum	common cis-acting element in promoter and enhancer regions
EVM.MODEL.UTG19621.11	CAAT-box	CAAT	1274	4	+	Nicotiana glutinosa
EVM.MODEL.UTG19621.11	CAAT-box	CAAT	1317	4	-	Nicotiana glutinosa
EVM.MODEL.UTG19621.11	CAAT-box	CAAT	1353	4	+	Nicotiana glutinosa
EVM.MODEL.UTG19621.11	CAAT-box	CAAT	1371	4	+	Nicotiana glutinosa
EVM.MODEL.UTG19621.11	CAAT-box	CAAT	1386	4	-	Nicotiana glutinosa
EVM.MODEL.UTG19621.11	CAAT-box	CCAAT	1484	5	+	Arabidopsis thaliana	common cis-acting element in promoter and enhancer regions
EVM.MODEL.UTG19621.11	CAAT-box	CAAT	1485	4	+	Nicotiana glutinosa
EVM.MODEL.UTG19621.11	CAAT-box	CAAT	1489	4	-	Nicotiana glutinosa
EVM.MODEL.UTG19621.11	CAAT-box	CAAT	1521	4	-	Nicotiana glutinosa
EVM.MODEL.UTG19621.11	CAAT-box	CAAT	1610	4	+	Nicotiana glutinosa
EVM.MODEL.UTG19621.11	CAAT-box	CAAT	1684	4	+	Nicotiana glutinosa
EVM.MODEL.UTG19621.11	CAAT-box	CAAT	1686	4	-	Nicotiana glutinosa
EVM.MODEL.UTG19621.11	CAAT-box	CAAAT	1694	5	-	Pisum sativum	common cis-acting element in promoter and enhancer regions
EVM.MODEL.UTG19621.11	CAAT-box	CAAAT	1729	5	-	Pisum sativum	common cis-acting element in promoter and enhancer regions
EVM.MODEL.UTG19621.11	CAAT-box	CAAAT	1756	5	+	Pisum sativum	common cis-acting element in promoter and enhancer regions
EVM.MODEL.UTG19621.11	CAAT-box	CCAAT	1907	5	+	Arabidopsis thaliana	common cis-acting element in promoter and enhancer regions
EVM.MODEL.UTG19621.11	CAAT-box	CAAT	1908	4	+	Nicotiana glutinosa
EVM.MODEL.UTG19621.11	CAAT-box	CAAT	1954	4	+	Nicotiana glutinosa
EVM.MODEL.UTG19621.11	CAAT-box	CAAT	2014	4	-	Nicotiana glutinosa
EVM.MODEL.UTG19621.11	TATA	TATAAAAT	420	8	-	Arabidopsis thaliana
EVM.MODEL.UTG19621.11	TATA	TATAAAAT	546	8	-	Arabidopsis thaliana
EVM.MODEL.UTG19621.11	O2-site	GATGATGTGG	1796	9	-	Zea mays	cis-acting regulatory element involved in zein metabolism regulation
EVM.MODEL.UTG19621.11	ARE	AAACCA	308	6	+	Zea mays	cis-acting regulatory element essential for the anaerobic induction
EVM.MODEL.UTG19621.11	ARE	AAACCA	490	6	-	Zea mays	cis-acting regulatory element essential for the anaerobic induction
EVM.MODEL.UTG19621.11	ARE	AAACCA	1010	6	+	Zea mays	cis-acting regulatory element essential for the anaerobic induction
EVM.MODEL.UTG19621.11	Box 4	ATTAAT	84	6	+	Petroselinum crispum	part of a conserved DNA module involved in light responsiveness
EVM.MODEL.UTG19621.11	Box 4	ATTAAT	1104	6	-	Petroselinum crispum	part of a conserved DNA module involved in light responsiveness
EVM.MODEL.UTG19621.11	Box 4	ATTAAT	1360	6	-	Petroselinum crispum	part of a conserved DNA module involved in light responsiveness
EVM.MODEL.UTG19621.11	Box II -like sequence	TCCGTGTACCA	1899	10	+	Oryza sativa	cis-acting regulatory element
EVM.MODEL.UTG19621.11	AT~TATA-box	TATATA	94	6	+	Arabidopsis thaliana
EVM.MODEL.UTG19621.11	AT~TATA-box	TATATAAA	345	8	-	Arabidopsis thaliana
EVM.MODEL.UTG19621.11	AT~TATA-box	TATATA	347	6	+	Arabidopsis thaliana
EVM.MODEL.UTG19621.11	AT~TATA-box	TATATA	374	6	+	Arabidopsis thaliana
EVM.MODEL.UTG19621.11	AT~TATA-box	TATATA	376	6	+	Arabidopsis thaliana
EVM.MODEL.UTG19621.11	AT~TATA-box	TATATA	433	6	+	Arabidopsis thaliana
EVM.MODEL.UTG19621.11	AT~TATA-box	TATATAAA	641	8	-	Arabidopsis thaliana
EVM.MODEL.UTG19621.11	AT~TATA-box	TATATA	643	6	+	Arabidopsis thaliana
EVM.MODEL.UTG19621.11	AT~TATA-box	TATATA	656	6	+	Arabidopsis thaliana
EVM.MODEL.UTG19621.11	AT~TATA-box	TATATA	784	6	+	Arabidopsis thaliana
EVM.MODEL.UTG19621.11	AT~TATA-box	TATATA	957	6	+	Arabidopsis thaliana
EVM.MODEL.UTG19621.11	AT~TATA-box	TATATAAA	1673	8	-	Arabidopsis thaliana
EVM.MODEL.UTG19621.11	AT~TATA-box	TATATA	1675	6	-	Arabidopsis thaliana
EVM.MODEL.UTG19621.11	AT~TATA-box	TATATA	1934	6	-	Arabidopsis thaliana
EVM.MODEL.UTG19621.11	MYB	TAACCA	24	6	-	Arabidopsis thaliana
EVM.MODEL.UTG19621.11	MYB	CAACCA	192	6	+	Arabidopsis thaliana
EVM.MODEL.UTG19621.11	MYB	TAACCA	742	6	-	Arabidopsis thaliana
EVM.MODEL.UTG19621.11	MYB	TAACCA	1291	6	-	Arabidopsis thaliana
EVM.MODEL.UTG19621.11	MYC	CATTTG	107	6	+	Arabidopsis thaliana
EVM.MODEL.UTG19621.11	MYC	CATTTG	211	6	-	Arabidopsis thaliana
EVM.MODEL.UTG19621.11	MYC	CATTTG	293	6	+	Arabidopsis thaliana
EVM.MODEL.UTG19621.11	MYC	CAATTG	1684	6	-	Arabidopsis thaliana
EVM.MODEL.UTG19621.11	MYC	CATTTG	1693	6	+	Arabidopsis thaliana
EVM.MODEL.UTG19621.11	MYC	CATTTG	1728	6	+	Arabidopsis thaliana
EVM.MODEL.UTG19621.11	Unnamed__1	GAATTTAATTAA	1353	11	+	Glycine max	60K protein binding site
EVM.MODEL.UTG19621.11	Unnamed__1	CGTGG	1421	5	+	Zea mays
EVM.MODEL.UTG19621.11	Unnamed__1	CGTGG	1767	5	+	Zea mays
EVM.MODEL.UTG19621.11	STRE	AGGGG	1892	5	-	Arabidopsis thaliana
EVM.MODEL.UTG19621.11	circadian	CAAAGATATC	176	9	-	Lycopersicon esculentum	cis-acting regulatory element involved in circadian control
EVM.MODEL.UTG19621.11	Myb	CAACTG	143	6	-	Arabidopsis thaliana
EVM.MODEL.UTG19621.11	Myb	TAACTG	1242	6	+	Arabidopsis thaliana
EVM.MODEL.UTG19621.11	Myb	TAACTG	1572	6	-	Arabidopsis thaliana
EVM.MODEL.UTG19621.11	ERE	ATTTCATA	160	8	+	Nicotiana glutinos
EVM.MODEL.UTG19621.11	ERE	ATTTCATA	351	8	-	Nicotiana glutinos
EVM.MODEL.UTG19621.11	ERE	ATTTTAAA	1186	8	+	Nicotiana glutinos
EVM.MODEL.UTG19621.11	ERE	ATTTTAAA	1230	8	-	Nicotiana glutinos
EVM.MODEL.UTG19621.11	ERE	ATTTTAAA	1515	8	-	Nicotiana glutinos
EVM.MODEL.UTG19621.11	Gap-box	CAAATGAA(A/G)A	289	9	-	Arabidopsis thaliana	part of a light responsive element
EVM.MODEL.UTG19621.11	Unnamed__6	taTAAATATct	1213	11	+	Zea mays
EVM.MODEL.UTG19621.11	TCT-motif	TCTTAC	223	6	-	Arabidopsis thaliana	part of a light responsive element
EVM.MODEL.UTG19621.11		motif_sequence	274	4	+	organism	short_function
EVM.MODEL.UTG19621.11		motif_sequence	896	4	+	organism	short_function
EVM.MODEL.UTG19621.11		motif_sequence	1426	4	-	organism	short_function
EVM.MODEL.UTG19621.11		motif_sequence	1627	4	+	organism	short_function
EVM.MODEL.UTG19621.11		motif_sequence	1700	4	+	organism	short_function
EVM.MODEL.UTG19621.11		motif_sequence	1811	4	+	organism	short_function
EVM.MODEL.UTG19621.11	CGTCA-motif	CGTCA	444	5	-	Hordeum vulgare	cis-acting regulatory element involved in the MeJA-responsiveness
EVM.MODEL.UTG19621.11	CGTCA-motif	CGTCA	447	5	+	Hordeum vulgare	cis-acting regulatory element involved in the MeJA-responsiveness
EVM.MODEL.UTG19621.11	WRE3	CCACCT	195	6	+	Pisum sativum
EVM.MODEL.UTG19621.3	GT1-motif	GGTTAA	1005	6	+	Arabidopsis thaliana	light responsive element
EVM.MODEL.UTG19621.3	GT1-motif	GGTTAA	1644	6	-	Arabidopsis thaliana	light responsive element
EVM.MODEL.UTG19621.3	GT1-motif	GGTTAA	1825	6	+	Arabidopsis thaliana	light responsive element
EVM.MODEL.UTG19621.3	WUN-motif	AAATTACTA	298	9	-	Nicotiana glutinosa
EVM.MODEL.UTG19621.3	WUN-motif	AAATTACT	299	8	-	Nicotiana glutinosa
EVM.MODEL.UTG19621.3	MYB recognition site	CCGTTG	557	6	+	Arabidopsis thaliana
EVM.MODEL.UTG19621.3	chs-CMA1a	TTACTTAA	1838	8	+	Daucus carota	part of a light responsive element
EVM.MODEL.UTG19621.3	ABRE	CACGTG	952	6	+	Arabidopsis thaliana	cis-acting element involved in the abscisic acid responsiveness
EVM.MODEL.UTG19621.3	ABRE	ACGTG	953	5	+	Arabidopsis thaliana	cis-acting element involved in the abscisic acid responsiveness
EVM.MODEL.UTG19621.3	Unnamed__4	CTCC	127	4	-	Petroselinum hortense
EVM.MODEL.UTG19621.3	Unnamed__4	CTCC	162	4	+	Petroselinum hortense
EVM.MODEL.UTG19621.3	Unnamed__4	CTCC	165	4	+	Petroselinum hortense
EVM.MODEL.UTG19621.3	Unnamed__4	CTCC	210	4	-	Petroselinum hortense
EVM.MODEL.UTG19621.3	Unnamed__4	CTCC	1513	4	-	Petroselinum hortense
EVM.MODEL.UTG19621.3	Unnamed__4	CTCC	1517	4	+	Petroselinum hortense
EVM.MODEL.UTG19621.3	Unnamed__4	CTCC	1544	4	-	Petroselinum hortense
EVM.MODEL.UTG19621.3	Unnamed__4	CTCC	1570	4	+	Petroselinum hortense
EVM.MODEL.UTG19621.3	Unnamed__4	CTCC	1595	4	+	Petroselinum hortense
EVM.MODEL.UTG19621.3	Unnamed__4	CTCC	1850	4	+	Petroselinum hortense
EVM.MODEL.UTG19621.3	Unnamed__4	CTCC	1873	4	+	Petroselinum hortense
EVM.MODEL.UTG19621.3	CCAAT-box	CAACGG	557	6	-	Hordeum vulgare	MYBHv1 binding site
EVM.MODEL.UTG19621.3	Myb-binding site	CAACAG	1953	6	+	Nicotiana tabacum
EVM.MODEL.UTG19621.3	TGACG-motif	TGACG	1962	5	-	Hordeum vulgare	cis-acting regulatory element involved in the MeJA-responsiveness
EVM.MODEL.UTG19621.3	as-1	TGACG	1962	5	-	Arabidopsis thaliana
EVM.MODEL.UTG19621.3	G-box	CACGTG	952	6	+	Arabidopsis thaliana	cis-acting regulatory element involved in light responsiveness
EVM.MODEL.UTG19621.3	G-Box	CACGTG	952	6	+	Pisum sativum	cis-acting regulatory element involved in light responsiveness
EVM.MODEL.UTG19621.3	TATA-box	ATTATA	228	6	+	Brassica napus	core promoter element around -30 of transcription start
EVM.MODEL.UTG19621.3	TATA-box	TATATAA	229	7	-	Arabidopsis thaliana	core promoter element around -30 of transcription start
EVM.MODEL.UTG19621.3	TATA-box	TATATA	230	6	+	Arabidopsis thaliana	core promoter element around -30 of transcription start
EVM.MODEL.UTG19621.3	TATA-box	ATATAA	231	6	+	Brassica oleracea	core promoter element around -30 of transcription start
EVM.MODEL.UTG19621.3	TATA-box	TATA	232	4	+	Arabidopsis thaliana	core promoter element around -30 of transcription start
EVM.MODEL.UTG19621.3	TATA-box	ATATAT	250	6	+	Brassica napus	core promoter element around -30 of transcription start
EVM.MODEL.UTG19621.3	TATA-box	TATA	251	4	+	Arabidopsis thaliana	core promoter element around -30 of transcription start
EVM.MODEL.UTG19621.3	TATA-box	TATATA	332	6	+	Arabidopsis thaliana	core promoter element around -30 of transcription start
EVM.MODEL.UTG19621.3	TATA-box	ATATAT	333	6	+	Brassica napus	core promoter element around -30 of transcription start
EVM.MODEL.UTG19621.3	TATA-box	TATA	334	4	+	Arabidopsis thaliana	core promoter element around -30 of transcription start
EVM.MODEL.UTG19621.3	TATA-box	TATA	391	4	+	Arabidopsis thaliana	core promoter element around -30 of transcription start
EVM.MODEL.UTG19621.3	TATA-box	ATTATA	572	6	+	Brassica napus	core promoter element around -30 of transcription start
EVM.MODEL.UTG19621.3	TATA-box	TATAA	573	5	-	Arabidopsis thaliana	core promoter element around -30 of transcription start
EVM.MODEL.UTG19621.3	TATA-box	TATA	574	4	+	Arabidopsis thaliana	core promoter element around -30 of transcription start
EVM.MODEL.UTG19621.3	TATA-box	TATACA	777	6	-	Helianthus annuus	core promoter element around -30 of transcription start
EVM.MODEL.UTG19621.3	TATA-box	TATA	779	4	+	Arabidopsis thaliana	core promoter element around -30 of transcription start
EVM.MODEL.UTG19621.3	TATA-box	ATTATA	825	6	+	Brassica napus	core promoter element around -30 of transcription start
EVM.MODEL.UTG19621.3	TATA-box	TATAA	826	5	-	Arabidopsis thaliana	core promoter element around -30 of transcription start
EVM.MODEL.UTG19621.3	TATA-box	TATA	827	4	+	Arabidopsis thaliana	core promoter element around -30 of transcription start
EVM.MODEL.UTG19621.3	TATA-box	TATA	847	4	+	Arabidopsis thaliana	core promoter element around -30 of transcription start
EVM.MODEL.UTG19621.3	TATA-box	ATTATA	850	6	+	Brassica napus	core promoter element around -30 of transcription start
EVM.MODEL.UTG19621.3	TATA-box	TATAA	851	5	-	Arabidopsis thaliana	core promoter element around -30 of transcription start
EVM.MODEL.UTG19621.3	TATA-box	TATA	852	4	+	Arabidopsis thaliana	core promoter element around -30 of transcription start
EVM.MODEL.UTG19621.3	TATA-box	TATA	1047	4	-	Arabidopsis thaliana	core promoter element around -30 of transcription start
EVM.MODEL.UTG19621.3	TATA-box	ATTATA	1054	6	+	Brassica napus	core promoter element around -30 of transcription start
EVM.MODEL.UTG19621.3	TATA-box	TATAA	1055	5	-	Arabidopsis thaliana	core promoter element around -30 of transcription start
EVM.MODEL.UTG19621.3	TATA-box	TATA	1056	4	-	Arabidopsis thaliana	core promoter element around -30 of transcription start
EVM.MODEL.UTG19621.3	TATA-box	TATAAAT	1069	7	-	Brassica juncea	core promoter element around -30 of transcription start
EVM.MODEL.UTG19621.3	TATA-box	TATAAA	1070	6	-	Helianthus annuus	core promoter element around -30 of transcription start
EVM.MODEL.UTG19621.3	TATA-box	TATAA	1071	5	-	Arabidopsis thaliana	core promoter element around -30 of transcription start
EVM.MODEL.UTG19621.3	TATA-box	TATA	1072	4	-	Arabidopsis thaliana	core promoter element around -30 of transcription start
EVM.MODEL.UTG19621.3	TATA-box	ATATAT	1091	6	-	Brassica napus	core promoter element around -30 of transcription start
EVM.MODEL.UTG19621.3	TATA-box	TATA	1092	4	-	Arabidopsis thaliana	core promoter element around -30 of transcription start
EVM.MODEL.UTG19621.3	TATA-box	TATA	1204	4	-	Arabidopsis thaliana	core promoter element around -30 of transcription start
EVM.MODEL.UTG19621.3	TATA-box	ATATAA	1332	6	+	Brassica oleracea	core promoter element around -30 of transcription start
EVM.MODEL.UTG19621.3	TATA-box	TATA	1333	4	-	Arabidopsis thaliana	core promoter element around -30 of transcription start
EVM.MODEL.UTG19621.3	TATA-box	TATTTAAA	1342	8	+	Arabidopsis thaliana	core promoter element around -30 of transcription start
EVM.MODEL.UTG19621.3	TATA-box	TATA	1355	4	-	Arabidopsis thaliana	core promoter element around -30 of transcription start
EVM.MODEL.UTG19621.3	TATA-box	ATTATA	1426	6	+	Brassica napus	core promoter element around -30 of transcription start
EVM.MODEL.UTG19621.3	TATA-box	TATAA	1427	5	-	Arabidopsis thaliana	core promoter element around -30 of transcription start
EVM.MODEL.UTG19621.3	TATA-box	TATA	1428	4	-	Arabidopsis thaliana	core promoter element around -30 of transcription start
EVM.MODEL.UTG19621.3	TATA-box	TATA	1683	4	-	Arabidopsis thaliana	core promoter element around -30 of transcription start
EVM.MODEL.UTG19621.3	TATA-box	ATATAT	1707	6	-	Brassica napus	core promoter element around -30 of transcription start
EVM.MODEL.UTG19621.3	TATA-box	TATATA	1708	6	-	Arabidopsis thaliana	core promoter element around -30 of transcription start
EVM.MODEL.UTG19621.3	TATA-box	ATATAT	1709	6	-	Brassica napus	core promoter element around -30 of transcription start
EVM.MODEL.UTG19621.3	TATA-box	TATATA	1710	6	-	Arabidopsis thaliana	core promoter element around -30 of transcription start
EVM.MODEL.UTG19621.3	TATA-box	ATATAT	1711	6	-	Brassica napus	core promoter element around -30 of transcription start
EVM.MODEL.UTG19621.3	TATA-box	TATA	1712	4	-	Arabidopsis thaliana	core promoter element around -30 of transcription start
EVM.MODEL.UTG19621.3	TATA-box	TATAAAA	1722	7	-	Pisum sativum	core promoter element around -30 of transcription start
EVM.MODEL.UTG19621.3	TATA-box	TATAAA	1723	6	-	Helianthus annuus	core promoter element around -30 of transcription start
EVM.MODEL.UTG19621.3	TATA-box	TATATAA	1724	7	-	Arabidopsis thaliana	core promoter element around -30 of transcription start
EVM.MODEL.UTG19621.3	TATA-box	TATATA	1725	6	-	Arabidopsis thaliana	core promoter element around -30 of transcription start
EVM.MODEL.UTG19621.3	TATA-box	ATATAT	1726	6	-	Brassica napus	core promoter element around -30 of transcription start
EVM.MODEL.UTG19621.3	TATA-box	TATATA	1727	6	-	Arabidopsis thaliana	core promoter element around -30 of transcription start
EVM.MODEL.UTG19621.3	TATA-box	TATA	1729	4	-	Arabidopsis thaliana	core promoter element around -30 of transcription start
EVM.MODEL.UTG19621.3	TATA-box	TATA	1764	4	-	Arabidopsis thaliana	core promoter element around -30 of transcription start
EVM.MODEL.UTG19621.3	TATA-box	TACAAAA	1786	7	+	Oryza sativa	core promoter element around -30 of transcription start
EVM.MODEL.UTG19621.3	TATA-box	TATACA	1881	6	-	Helianthus annuus	core promoter element around -30 of transcription start
EVM.MODEL.UTG19621.3	TATA-box	TATATA	1883	6	-	Arabidopsis thaliana	core promoter element around -30 of transcription start
EVM.MODEL.UTG19621.3	TATA-box	ATATAT	1884	6	-	Brassica napus	core promoter element around -30 of transcription start
EVM.MODEL.UTG19621.3	TATA-box	TATATA	1885	6	-	Arabidopsis thaliana	core promoter element around -30 of transcription start
EVM.MODEL.UTG19621.3	TATA-box	ATATAT	1886	6	-	Brassica napus	core promoter element around -30 of transcription start
EVM.MODEL.UTG19621.3	TATA-box	TATATA	1887	6	-	Arabidopsis thaliana	core promoter element around -30 of transcription start
EVM.MODEL.UTG19621.3	TATA-box	TATA	1889	4	-	Arabidopsis thaliana	core promoter element around -30 of transcription start
EVM.MODEL.UTG19621.3	TATA-box	TATA	2018	4	-	Arabidopsis thaliana	core promoter element around -30 of transcription start
EVM.MODEL.UTG19621.3	ERE	ATTTTAAA	1140	8	+	Nicotiana glutinos
EVM.MODEL.UTG19621.3	ERE	ATTTTAAA	1142	8	-	Nicotiana glutinos
EVM.MODEL.UTG19621.3	ERE	ATTTTAAA	1344	8	-	Nicotiana glutinos
EVM.MODEL.UTG19621.3	CGTCA-motif	CGTCA	1962	5	+	Hordeum vulgare	cis-acting regulatory element involved in the MeJA-responsiveness
EVM.MODEL.UTG19621.3	TCT-motif	TCTTAC	837	6	-	Arabidopsis thaliana	part of a light responsive element
EVM.MODEL.UTG19621.3		motif_sequence	64	4	-	organism	short_function
EVM.MODEL.UTG19621.3		motif_sequence	98	4	+	organism	short_function
EVM.MODEL.UTG19621.3		motif_sequence	117	4	+	organism	short_function
EVM.MODEL.UTG19621.3		motif_sequence	483	4	+	organism	short_function
EVM.MODEL.UTG19621.3		motif_sequence	581	4	+	organism	short_function
EVM.MODEL.UTG19621.3		motif_sequence	812	4	-	organism	short_function
EVM.MODEL.UTG19621.3		motif_sequence	1221	4	-	organism	short_function
EVM.MODEL.UTG19621.3		motif_sequence	1241	4	-	organism	short_function
EVM.MODEL.UTG19621.3		motif_sequence	1256	4	-	organism	short_function
EVM.MODEL.UTG19621.3		motif_sequence	1593	4	+	organism	short_function
EVM.MODEL.UTG19621.3	Box 4	ATTAAT	198	6	+	Petroselinum crispum	part of a conserved DNA module involved in light responsiveness
EVM.MODEL.UTG19621.3	Box 4	ATTAAT	254	6	+	Petroselinum crispum	part of a conserved DNA module involved in light responsiveness
EVM.MODEL.UTG19621.3	Box 4	ATTAAT	1042	6	-	Petroselinum crispum	part of a conserved DNA module involved in light responsiveness
EVM.MODEL.UTG19621.3	Box 4	ATTAAT	1084	6	-	Petroselinum crispum	part of a conserved DNA module involved in light responsiveness
EVM.MODEL.UTG19621.3	Box 4	ATTAAT	1433	6	-	Petroselinum crispum	part of a conserved DNA module involved in light responsiveness
EVM.MODEL.UTG19621.3	ARE	AAACCA	1658	6	-	Zea mays	cis-acting regulatory element essential for the anaerobic induction
EVM.MODEL.UTG19621.3	TCA	TCATCTTCAT	579	9	+	Pisum sativum
EVM.MODEL.UTG19621.3	TCA-element	TCAGAAGAGG	355	9	+	Brassica oleracea	cis-acting element involved in salicylic acid responsiveness
EVM.MODEL.UTG19621.3	RY-element	CATGCATG	24	8	+	Helianthus annuus	cis-acting regulatory element involved in seed-specific regulation
EVM.MODEL.UTG19621.3	CAAT-box	CAAT	170	4	+	Nicotiana glutinosa
EVM.MODEL.UTG19621.3	CAAT-box	CAAT	349	4	+	Nicotiana glutinosa
EVM.MODEL.UTG19621.3	CAAT-box	CAAAT	375	5	+	Pisum sativum	common cis-acting element in promoter and enhancer regions
EVM.MODEL.UTG19621.3	CAAT-box	CAAAT	430	5	+	Pisum sativum	common cis-acting element in promoter and enhancer regions
EVM.MODEL.UTG19621.3	CAAT-box	CAAAT	521	5	+	Pisum sativum	common cis-acting element in promoter and enhancer regions
EVM.MODEL.UTG19621.3	CAAT-box	CAAAT	536	5	+	Pisum sativum	common cis-acting element in promoter and enhancer regions
EVM.MODEL.UTG19621.3	CAAT-box	CAAAT	603	5	+	Pisum sativum	common cis-acting element in promoter and enhancer regions
EVM.MODEL.UTG19621.3	CAAT-box	CAAAT	683	5	+	Pisum sativum	common cis-acting element in promoter and enhancer regions
EVM.MODEL.UTG19621.3	CAAT-box	CCAAT	700	5	-	Arabidopsis thaliana	common cis-acting element in promoter and enhancer regions
EVM.MODEL.UTG19621.3	CAAT-box	CAAAT	743	5	+	Pisum sativum	common cis-acting element in promoter and enhancer regions
EVM.MODEL.UTG19621.3	CAAT-box	CAAT	771	4	+	Nicotiana glutinosa
EVM.MODEL.UTG19621.3	CAAT-box	CAAAT	905	5	-	Pisum sativum	common cis-acting element in promoter and enhancer regions
EVM.MODEL.UTG19621.3	CAAT-box	CAAAT	918	5	-	Pisum sativum	common cis-acting element in promoter and enhancer regions
EVM.MODEL.UTG19621.3	CAAT-box	CAAT	1011	4	-	Nicotiana glutinosa
EVM.MODEL.UTG19621.3	CAAT-box	CAAAT	1022	5	-	Pisum sativum	common cis-acting element in promoter and enhancer regions
EVM.MODEL.UTG19621.3	CAAT-box	CAAAT	1028	5	-	Pisum sativum	common cis-acting element in promoter and enhancer regions
EVM.MODEL.UTG19621.3	CAAT-box	CAAT	1033	4	+	Nicotiana glutinosa
EVM.MODEL.UTG19621.3	CAAT-box	CAAAT	1035	5	-	Pisum sativum	common cis-acting element in promoter and enhancer regions
EVM.MODEL.UTG19621.3	CAAT-box	CAAT	1095	4	-	Nicotiana glutinosa
EVM.MODEL.UTG19621.3	CAAT-box	CAAT	1102	4	-	Nicotiana glutinosa
EVM.MODEL.UTG19621.3	CAAT-box	CCAAT	1170	5	+	Arabidopsis thaliana	common cis-acting element in promoter and enhancer regions
EVM.MODEL.UTG19621.3	CAAT-box	CAAT	1171	4	+	Nicotiana glutinosa
EVM.MODEL.UTG19621.3	CAAT-box	CAAT	1173	4	-	Nicotiana glutinosa
EVM.MODEL.UTG19621.3	CAAT-box	CAAT	1251	4	+	Nicotiana glutinosa
EVM.MODEL.UTG19621.3	CAAT-box	CAAAT	1286	5	-	Pisum sativum	common cis-acting element in promoter and enhancer regions
EVM.MODEL.UTG19621.3	CAAT-box	CAAAT	1294	5	-	Pisum sativum	common cis-acting element in promoter and enhancer regions
EVM.MODEL.UTG19621.3	CAAT-box	CAAAT	1309	5	+	Pisum sativum	common cis-acting element in promoter and enhancer regions
EVM.MODEL.UTG19621.3	CAAT-box	CAAT	1350	4	-	Nicotiana glutinosa
EVM.MODEL.UTG19621.3	CAAT-box	CAAT	1372	4	+	Nicotiana glutinosa
EVM.MODEL.UTG19621.3	CAAT-box	CAAT	1389	4	-	Nicotiana glutinosa
EVM.MODEL.UTG19621.3	CAAT-box	CAAAT	1408	5	-	Pisum sativum	common cis-acting element in promoter and enhancer regions
EVM.MODEL.UTG19621.3	CAAT-box	CAAT	1506	4	-	Nicotiana glutinosa
EVM.MODEL.UTG19621.3	CAAT-box	CAAAT	1534	5	-	Pisum sativum	common cis-acting element in promoter and enhancer regions
EVM.MODEL.UTG19621.3	CAAT-box	CAAT	1639	4	-	Nicotiana glutinosa
EVM.MODEL.UTG19621.3	CAAT-box	CAAT	1665	4	-	Nicotiana glutinosa
EVM.MODEL.UTG19621.3	CAAT-box	CAAAT	1686	5	-	Pisum sativum	common cis-acting element in promoter and enhancer regions
EVM.MODEL.UTG19621.3	CAAT-box	CAAAT	1697	5	+	Pisum sativum	common cis-acting element in promoter and enhancer regions
EVM.MODEL.UTG19621.3	CAAT-box	CAAT	1734	4	-	Nicotiana glutinosa
EVM.MODEL.UTG19621.3	CAAT-box	CAAT	1758	4	+	Nicotiana glutinosa
EVM.MODEL.UTG19621.3	CAAT-box	CAAAT	1877	5	+	Pisum sativum	common cis-acting element in promoter and enhancer regions
EVM.MODEL.UTG19621.3	CAAT-box	CAAT	1910	4	+	Nicotiana glutinosa
EVM.MODEL.UTG19621.3	CAAT-box	CAAT	1943	4	+	Nicotiana glutinosa
EVM.MODEL.UTG19621.3	TATA	TATAAAAT	1721	8	-	Arabidopsis thaliana
EVM.MODEL.UTG19621.3	MYC	CATGTG	271	6	-	Arabidopsis thaliana
EVM.MODEL.UTG19621.3	MYC	CATGTG	482	6	+	Arabidopsis thaliana
EVM.MODEL.UTG19621.3	MYC	CATTTG	743	6	-	Arabidopsis thaliana
EVM.MODEL.UTG19621.3	MYC	CATGTG	1163	6	+	Arabidopsis thaliana
EVM.MODEL.UTG19621.3	MYC	CAATTG	1171	6	-	Arabidopsis thaliana
EVM.MODEL.UTG19621.3	MYC	CATTTG	1877	6	-	Arabidopsis thaliana
EVM.MODEL.UTG19621.3	MYB	CAACCA	1949	6	+	Arabidopsis thaliana
EVM.MODEL.UTG19621.3	MYB	CAACAG	1953	6	+	Arabidopsis thaliana
EVM.MODEL.UTG19621.3	STRE	AGGGG	634	5	+	Arabidopsis thaliana
EVM.MODEL.UTG19621.3	Myb	TAACTG	611	6	-	Arabidopsis thaliana
EVM.MODEL.UTG19621.3	GARE-motif	TCTGTTG	1953	7	-	Brassica oleracea	gibberellin-responsive element
EVM.MODEL.UTG19621.3	AT~TATA-box	TATATA	230	6	+	Arabidopsis thaliana
EVM.MODEL.UTG19621.3	AT~TATA-box	TATATA	332	6	+	Arabidopsis thaliana
EVM.MODEL.UTG19621.3	AT~TATA-box	TATATA	1708	6	-	Arabidopsis thaliana
EVM.MODEL.UTG19621.3	AT~TATA-box	TATATA	1710	6	-	Arabidopsis thaliana
EVM.MODEL.UTG19621.3	AT~TATA-box	TATATAAA	1723	8	-	Arabidopsis thaliana
EVM.MODEL.UTG19621.3	AT~TATA-box	TATATA	1725	6	-	Arabidopsis thaliana
EVM.MODEL.UTG19621.3	AT~TATA-box	TATATA	1727	6	-	Arabidopsis thaliana
EVM.MODEL.UTG19621.3	AT~TATA-box	TATATA	1883	6	-	Arabidopsis thaliana
EVM.MODEL.UTG19621.3	AT~TATA-box	TATATA	1885	6	-	Arabidopsis thaliana
EVM.MODEL.UTG19621.3	AT~TATA-box	TATATA	1887	6	-	Arabidopsis thaliana
EVM.MODEL.UTG19621.4	O2-site	GATGATGTGG	144	9	-	Zea mays	cis-acting regulatory element involved in zein metabolism regulation
EVM.MODEL.UTG19621.4	O2-site	GATGACATGG	1025	9	+	Zea mays	cis-acting regulatory element involved in zein metabolism regulation
EVM.MODEL.UTG19621.4	CAAT-box	CAAAT	75	5	+	Pisum sativum	common cis-acting element in promoter and enhancer regions
EVM.MODEL.UTG19621.4	CAAT-box	CAAT	117	4	-	Nicotiana glutinosa
EVM.MODEL.UTG19621.4	CAAT-box	CAAT	121	4	+	Nicotiana glutinosa
EVM.MODEL.UTG19621.4	CAAT-box	CCAAT	138	5	+	Arabidopsis thaliana	common cis-acting element in promoter and enhancer regions
EVM.MODEL.UTG19621.4	CAAT-box	CAAT	139	4	+	Nicotiana glutinosa
EVM.MODEL.UTG19621.4	CAAT-box	CAAT	208	4	+	Nicotiana glutinosa
EVM.MODEL.UTG19621.4	CAAT-box	CAAT	428	4	-	Nicotiana glutinosa
EVM.MODEL.UTG19621.4	CAAT-box	CAAT	532	4	-	Nicotiana glutinosa
EVM.MODEL.UTG19621.4	CAAT-box	CAAT	559	4	+	Nicotiana glutinosa
EVM.MODEL.UTG19621.4	CAAT-box	CCAAT	561	5	-	Arabidopsis thaliana	common cis-acting element in promoter and enhancer regions
EVM.MODEL.UTG19621.4	CAAT-box	CAAT	571	4	-	Nicotiana glutinosa
EVM.MODEL.UTG19621.4	CAAT-box	CAAAT	685	5	+	Pisum sativum	common cis-acting element in promoter and enhancer regions
EVM.MODEL.UTG19621.4	CAAT-box	CAAT	728	4	+	Nicotiana glutinosa
EVM.MODEL.UTG19621.4	CAAT-box	CAAAT	747	5	+	Pisum sativum	common cis-acting element in promoter and enhancer regions
EVM.MODEL.UTG19621.4	CAAT-box	CCAAT	763	5	-	Arabidopsis thaliana	common cis-acting element in promoter and enhancer regions
EVM.MODEL.UTG19621.4	CAAT-box	CAAT	776	4	+	Nicotiana glutinosa
EVM.MODEL.UTG19621.4	CAAT-box	CAAT	873	4	+	Nicotiana glutinosa
EVM.MODEL.UTG19621.4	CAAT-box	CAAT	937	4	+	Nicotiana glutinosa
EVM.MODEL.UTG19621.4	CAAT-box	CAAT	965	4	-	Nicotiana glutinosa
EVM.MODEL.UTG19621.4	CAAT-box	CAAT	1056	4	+	Nicotiana glutinosa
EVM.MODEL.UTG19621.4	CAAT-box	CAAAT	1081	5	+	Pisum sativum	common cis-acting element in promoter and enhancer regions
EVM.MODEL.UTG19621.4	CAAT-box	CAAT	1084	4	-	Nicotiana glutinosa
EVM.MODEL.UTG19621.4	CAAT-box	CAAT	1124	4	+	Nicotiana glutinosa
EVM.MODEL.UTG19621.4	CAAT-box	CCAAT	1139	5	-	Arabidopsis thaliana	common cis-acting element in promoter and enhancer regions
EVM.MODEL.UTG19621.4	CAAT-box	CAAT	1147	4	-	Nicotiana glutinosa
EVM.MODEL.UTG19621.4	CAAT-box	CAAAT	1155	5	-	Pisum sativum	common cis-acting element in promoter and enhancer regions
EVM.MODEL.UTG19621.4	CAAT-box	CAAT	1161	4	+	Nicotiana glutinosa
EVM.MODEL.UTG19621.4	CAAT-box	CAAT	1205	4	+	Nicotiana glutinosa
EVM.MODEL.UTG19621.4	CAAT-box	CCAAT	1272	5	+	Arabidopsis thaliana	common cis-acting element in promoter and enhancer regions
EVM.MODEL.UTG19621.4	CAAT-box	CAAT	1273	4	+	Nicotiana glutinosa
EVM.MODEL.UTG19621.4	CAAT-box	CCAAT	1341	5	-	Arabidopsis thaliana	common cis-acting element in promoter and enhancer regions
EVM.MODEL.UTG19621.4	CAAT-box	CCAAT	1394	5	-	Arabidopsis thaliana	common cis-acting element in promoter and enhancer regions
EVM.MODEL.UTG19621.4	CAAT-box	CAAT	1473	4	+	Nicotiana glutinosa
EVM.MODEL.UTG19621.4	CAAT-box	CAAT	1475	4	-	Nicotiana glutinosa
EVM.MODEL.UTG19621.4	CAAT-box	CAAT	1567	4	+	Nicotiana glutinosa
EVM.MODEL.UTG19621.4	CAAT-box	CCAAT	1593	5	+	Arabidopsis thaliana	common cis-acting element in promoter and enhancer regions
EVM.MODEL.UTG19621.4	CAAT-box	CAAT	1594	4	+	Nicotiana glutinosa
EVM.MODEL.UTG19621.4	CAAT-box	CAAT	1631	4	-	Nicotiana glutinosa
EVM.MODEL.UTG19621.4	CAAT-box	CAAT	1635	4	-	Nicotiana glutinosa
EVM.MODEL.UTG19621.4	CAAT-box	CAAT	1661	4	-	Nicotiana glutinosa
EVM.MODEL.UTG19621.4	CAAT-box	CAAT	1697	4	+	Nicotiana glutinosa
EVM.MODEL.UTG19621.4	CAAT-box	CAAT	1742	4	+	Nicotiana glutinosa
EVM.MODEL.UTG19621.4	CAAT-box	CAAT	1747	4	-	Nicotiana glutinosa
EVM.MODEL.UTG19621.4	CAAT-box	CCAAT	1810	5	-	Arabidopsis thaliana	common cis-acting element in promoter and enhancer regions
EVM.MODEL.UTG19621.4	RY-element	CATGCATG	1234	8	-	Helianthus annuus	cis-acting regulatory element involved in seed-specific regulation
EVM.MODEL.UTG19621.4	ARE	AAACCA	374	6	+	Zea mays	cis-acting regulatory element essential for the anaerobic induction
EVM.MODEL.UTG19621.4	ARE	AAACCA	706	6	-	Zea mays	cis-acting regulatory element essential for the anaerobic induction
EVM.MODEL.UTG19621.4	ARE	AAACCA	1217	6	+	Zea mays	cis-acting regulatory element essential for the anaerobic induction
EVM.MODEL.UTG19621.4	ARE	AAACCA	1724	6	+	Zea mays	cis-acting regulatory element essential for the anaerobic induction
EVM.MODEL.UTG19621.4	Box 4	ATTAAT	1495	6	-	Petroselinum crispum	part of a conserved DNA module involved in light responsiveness
EVM.MODEL.UTG19621.4	AE-box	AGAAACAA	1425	8	+	Arabidopsis thaliana	part of a module for light response
EVM.MODEL.UTG19621.4	AT~TATA-box	TATATA	624	6	+	Arabidopsis thaliana
EVM.MODEL.UTG19621.4	AT~TATA-box	TATATA	1908	6	-	Arabidopsis thaliana
EVM.MODEL.UTG19621.4	AT~TATA-box	TATATA	1910	6	-	Arabidopsis thaliana
EVM.MODEL.UTG19621.4	AT~TATA-box	TATATA	1912	6	-	Arabidopsis thaliana
EVM.MODEL.UTG19621.4	AT~TATA-box	TATATA	1914	6	-	Arabidopsis thaliana
EVM.MODEL.UTG19621.4	GARE-motif	TCTGTTG	1452	7	-	Brassica oleracea	gibberellin-responsive element
EVM.MODEL.UTG19621.4	CAT-box	GCCACT	1358	6	+	Arabidopsis thaliana	cis-acting regulatory element related to meristem expression
EVM.MODEL.UTG19621.4	Myb	CAACTG	30	6	-	Arabidopsis thaliana
EVM.MODEL.UTG19621.4	Myb	TAACTG	276	6	-	Arabidopsis thaliana
EVM.MODEL.UTG19621.4	Myb	TAACTG	1842	6	-	Arabidopsis thaliana
EVM.MODEL.UTG19621.4	Myb	CAACTG	1931	6	-	Arabidopsis thaliana
EVM.MODEL.UTG19621.4	Unnamed__1	CGTGG	1733	5	-	Zea mays
EVM.MODEL.UTG19621.4	STRE	AGGGG	459	5	+	Arabidopsis thaliana
EVM.MODEL.UTG19621.4	STRE	AGGGG	504	5	-	Arabidopsis thaliana
EVM.MODEL.UTG19621.4	STRE	AGGGG	865	5	+	Arabidopsis thaliana
EVM.MODEL.UTG19621.4	STRE	AGGGG	1801	5	+	Arabidopsis thaliana
EVM.MODEL.UTG19621.4	MYC	CATGTG	340	6	-	Arabidopsis thaliana
EVM.MODEL.UTG19621.4	MYC	CAATTG	559	6	+	Arabidopsis thaliana
EVM.MODEL.UTG19621.4	MYC	CATGTG	1232	6	-	Arabidopsis thaliana
EVM.MODEL.UTG19621.4	MYC	CAATTG	1473	6	-	Arabidopsis thaliana
EVM.MODEL.UTG19621.4	MYB	CAACCA	450	6	-	Arabidopsis thaliana
EVM.MODEL.UTG19621.4	MYB	CAACAG	470	6	+	Arabidopsis thaliana
EVM.MODEL.UTG19621.4	MYB	TAACCA	1378	6	-	Arabidopsis thaliana
EVM.MODEL.UTG19621.4	MYB	CAACAG	1452	6	+	Arabidopsis thaliana
EVM.MODEL.UTG19621.4	MYB	TAACCA	1502	6	-	Arabidopsis thaliana
EVM.MODEL.UTG19621.4	ATC-motif	AGTAATCT	787	8	-	Spinacia oleracea	part of a conserved DNA module involved in light responsiveness
EVM.MODEL.UTG19621.4		motif_sequence	102	4	+	organism	short_function
EVM.MODEL.UTG19621.4		motif_sequence	241	4	+	organism	short_function
EVM.MODEL.UTG19621.4		motif_sequence	357	4	+	organism	short_function
EVM.MODEL.UTG19621.4		motif_sequence	605	4	-	organism	short_function
EVM.MODEL.UTG19621.4		motif_sequence	1112	4	-	organism	short_function
EVM.MODEL.UTG19621.4		motif_sequence	1174	4	-	organism	short_function
EVM.MODEL.UTG19621.4		motif_sequence	1188	4	+	organism	short_function
EVM.MODEL.UTG19621.4		motif_sequence	1251	4	+	organism	short_function
EVM.MODEL.UTG19621.4		motif_sequence	1337	4	-	organism	short_function
EVM.MODEL.UTG19621.4		motif_sequence	1416	4	-	organism	short_function
EVM.MODEL.UTG19621.4		motif_sequence	1520	4	-	organism	short_function
EVM.MODEL.UTG19621.4		motif_sequence	1757	4	+	organism	short_function
EVM.MODEL.UTG19621.4		motif_sequence	1766	4	+	organism	short_function
EVM.MODEL.UTG19621.4		motif_sequence	1837	4	+	organism	short_function
EVM.MODEL.UTG19621.4		motif_sequence	1900	4	+	organism	short_function
EVM.MODEL.UTG19621.4		motif_sequence	1965	4	+	organism	short_function
EVM.MODEL.UTG19621.4		motif_sequence	1982	4	-	organism	short_function
EVM.MODEL.UTG19621.4	WRE3	CCACCT	50	6	+	Pisum sativum
EVM.MODEL.UTG19621.4	CGTCA-motif	CGTCA	847	5	-	Hordeum vulgare	cis-acting regulatory element involved in the MeJA-responsiveness
EVM.MODEL.UTG19621.4	G-Box	CACGTT	297	6	-	Pisum sativum	cis-acting regulatory element involved in light responsiveness
EVM.MODEL.UTG19621.4	G-Box	CACGTT	444	6	+	Pisum sativum	cis-acting regulatory element involved in light responsiveness
EVM.MODEL.UTG19621.4	G-Box	CACGTT	969	6	+	Pisum sativum	cis-acting regulatory element involved in light responsiveness
EVM.MODEL.UTG19621.4	G-Box	CACGTT	1622	6	+	Pisum sativum	cis-acting regulatory element involved in light responsiveness
EVM.MODEL.UTG19621.4	G-box	CACGAC	723	6	+	Zea mays	cis-acting regulatory element involved in light responsiveness
EVM.MODEL.UTG19621.4	TGACG-motif	TGACG	847	5	+	Hordeum vulgare	cis-acting regulatory element involved in the MeJA-responsiveness
EVM.MODEL.UTG19621.4	as-1	TGACG	847	5	+	Arabidopsis thaliana
EVM.MODEL.UTG19621.4	MSA-like	TCCAACGGT	1785	9	+	Catharanthus roseus	cis-acting element involved in cell cycle regulation
EVM.MODEL.UTG19621.4	Myb-binding site	CAACAG	470	6	+	Nicotiana tabacum
EVM.MODEL.UTG19621.4	Myb-binding site	CAACAG	1452	6	+	Nicotiana tabacum
EVM.MODEL.UTG19621.4	TATA-box	TATAA	226	5	-	Arabidopsis thaliana	core promoter element around -30 of transcription start
EVM.MODEL.UTG19621.4	TATA-box	TATA	227	4	+	Arabidopsis thaliana	core promoter element around -30 of transcription start
EVM.MODEL.UTG19621.4	TATA-box	TACAAAA	398	7	+	Oryza sativa	core promoter element around -30 of transcription start
EVM.MODEL.UTG19621.4	TATA-box	TATATA	624	6	+	Arabidopsis thaliana	core promoter element around -30 of transcription start
EVM.MODEL.UTG19621.4	TATA-box	ATATAT	625	6	+	Brassica napus	core promoter element around -30 of transcription start
EVM.MODEL.UTG19621.4	TATA-box	TATA	626	4	+	Arabidopsis thaliana	core promoter element around -30 of transcription start
EVM.MODEL.UTG19621.4	TATA-box	ccTATAAAaa	801	9	-	Arabidopsis thaliana	core promoter element around -30 of transcription start
EVM.MODEL.UTG19621.4	TATA-box	TATA	840	4	+	Arabidopsis thaliana	core promoter element around -30 of transcription start
EVM.MODEL.UTG19621.4	TATA-box	TATA	1466	4	-	Arabidopsis thaliana	core promoter element around -30 of transcription start
EVM.MODEL.UTG19621.4	TATA-box	TACAAAA	1720	7	+	Oryza sativa	core promoter element around -30 of transcription start
EVM.MODEL.UTG19621.4	TATA-box	ATTATA	1820	6	+	Brassica napus	core promoter element around -30 of transcription start
EVM.MODEL.UTG19621.4	TATA-box	TATAA	1821	5	-	Arabidopsis thaliana	core promoter element around -30 of transcription start
EVM.MODEL.UTG19621.4	TATA-box	TATA	1822	4	-	Arabidopsis thaliana	core promoter element around -30 of transcription start
EVM.MODEL.UTG19621.4	TATA-box	ATTATA	1829	6	+	Brassica napus	core promoter element around -30 of transcription start
EVM.MODEL.UTG19621.4	TATA-box	TATAA	1830	5	-	Arabidopsis thaliana	core promoter element around -30 of transcription start
EVM.MODEL.UTG19621.4	TATA-box	TATA	1831	4	-	Arabidopsis thaliana	core promoter element around -30 of transcription start
EVM.MODEL.UTG19621.4	TATA-box	TATACA	1906	6	-	Helianthus annuus	core promoter element around -30 of transcription start
EVM.MODEL.UTG19621.4	TATA-box	TATATA	1908	6	-	Arabidopsis thaliana	core promoter element around -30 of transcription start
EVM.MODEL.UTG19621.4	TATA-box	ATATAT	1909	6	-	Brassica napus	core promoter element around -30 of transcription start
EVM.MODEL.UTG19621.4	TATA-box	TATATA	1910	6	-	Arabidopsis thaliana	core promoter element around -30 of transcription start
EVM.MODEL.UTG19621.4	TATA-box	ATATAT	1911	6	-	Brassica napus	core promoter element around -30 of transcription start
EVM.MODEL.UTG19621.4	TATA-box	TATATA	1912	6	-	Arabidopsis thaliana	core promoter element around -30 of transcription start
EVM.MODEL.UTG19621.4	TATA-box	ATATAT	1913	6	-	Brassica napus	core promoter element around -30 of transcription start
EVM.MODEL.UTG19621.4	TATA-box	TATATA	1914	6	-	Arabidopsis thaliana	core promoter element around -30 of transcription start
EVM.MODEL.UTG19621.4	TATA-box	TATA	1916	4	-	Arabidopsis thaliana	core promoter element around -30 of transcription start
EVM.MODEL.UTG19621.4	P-box	CCTTTTG	41	7	+	Oryza sativa	gibberellin-responsive element
EVM.MODEL.UTG19621.4	HD-Zip 1	CAAT(A/T)ATTG	1742	8.5	-	Arabidopsis thaliana	element involved in differentiation of the palisade mesophyll cells
EVM.MODEL.UTG19621.4	ABRE	ACGTG	298	5	+	Arabidopsis thaliana	cis-acting element involved in the abscisic acid responsiveness
EVM.MODEL.UTG19621.4	ABRE	ACGTG	444	5	-	Arabidopsis thaliana	cis-acting element involved in the abscisic acid responsiveness
EVM.MODEL.UTG19621.4	ABRE	ACGTG	969	5	-	Arabidopsis thaliana	cis-acting element involved in the abscisic acid responsiveness
EVM.MODEL.UTG19621.4	ABRE	ACGTG	1622	5	-	Arabidopsis thaliana	cis-acting element involved in the abscisic acid responsiveness
EVM.MODEL.UTG19621.4	MYB recognition site	CCGTTG	1437	6	+	Arabidopsis thaliana
EVM.MODEL.UTG19621.4	MYB recognition site	CCGTTG	1787	6	-	Arabidopsis thaliana
EVM.MODEL.UTG19621.4	MBS	CAACTG	30	6	-	Arabidopsis thaliana	MYB binding site involved in drought-inducibility
EVM.MODEL.UTG19621.4	MBS	CAACTG	1931	6	-	Arabidopsis thaliana	MYB binding site involved in drought-inducibility
EVM.MODEL.UTG19621.4	MYB-like sequence	TAACCA	1378	6	-	Arabidopsis thaliana
EVM.MODEL.UTG19621.4	MYB-like sequence	TAACCA	1502	6	-	Arabidopsis thaliana
EVM.MODEL.UTG19621.4	ATCT-motif	AATCTAATCC	1269	9	+	Pisum sativum	part of a conserved DNA module involved in light responsiveness
EVM.MODEL.UTG19621.4	GT1-motif	GGTTAA	1503	6	+	Arabidopsis thaliana	light responsive element
EVM.MODEL.UTG19621.4	I-box	atGATAAGGTC	198	10	+	Helianthus annuus	part of a light responsive element
EVM.MODEL.UTG19621.4	I-box	AGATAAGG	237	8	-	Triticum aestivum	part of a light responsive element
EVM.MODEL.UTG19621.4	CCAAT-box	CAACGG	1437	6	-	Hordeum vulgare	MYBHv1 binding site
EVM.MODEL.UTG19621.4	CCAAT-box	CAACGG	1787	6	+	Hordeum vulgare	MYBHv1 binding site
EVM.MODEL.UTG19621.4	Unnamed__4	CTCC	104	4	+	Petroselinum hortense
EVM.MODEL.UTG19621.4	Unnamed__4	CTCC	479	4	-	Petroselinum hortense
EVM.MODEL.UTG19621.4	Unnamed__4	CTCC	502	4	+	Petroselinum hortense
EVM.MODEL.UTG19621.4	Unnamed__4	CTCC	605	4	-	Petroselinum hortense
EVM.MODEL.UTG19621.4	Unnamed__4	CTCC	1305	4	+	Petroselinum hortense
EVM.MODEL.UTG19621.4	Unnamed__4	CTCC	1416	4	-	Petroselinum hortense
EVM.MODEL.UTG19621.4	Unnamed__4	CTCC	1529	4	-	Petroselinum hortense
EVM.MODEL.UTG19621.4	Unnamed__4	CTCC	1813	4	-	Petroselinum hortense
EVM.MODEL.UTG19621.4	W box	TTGACC	1280	6	-	Arabidopsis thaliana
EVM.MODEL.UTG19621.4	TGA-element	AACGAC	999	6	+	Brassica oleracea	auxin-responsive element
EVM.MODEL.UTG19621.4	Myc	TCTCTTA	192	7	+	Arabidopsis thaliana
EVM.MODEL.UTG2547.14	MRE	AACCTAA	298	7	+	Petroselinum crispum	MYB binding site involved in light responsiveness
EVM.MODEL.UTG2547.14	CGTCA-motif	CGTCA	359	5	-	Hordeum vulgare	cis-acting regulatory element involved in the MeJA-responsiveness
EVM.MODEL.UTG2547.14	TCT-motif	TCTTAC	396	6	-	Arabidopsis thaliana	part of a light responsive element
EVM.MODEL.UTG2547.14	Unnamed__6	taTAAATATct	1674	10	+	Zea mays
EVM.MODEL.UTG2547.14		motif_sequence	33	4	+	organism	short_function
EVM.MODEL.UTG2547.14		motif_sequence	312	4	+	organism	short_function
EVM.MODEL.UTG2547.14		motif_sequence	1162	4	+	organism	short_function
EVM.MODEL.UTG2547.14		motif_sequence	1230	4	-	organism	short_function
EVM.MODEL.UTG2547.14		motif_sequence	1395	4	-	organism	short_function
EVM.MODEL.UTG2547.14		motif_sequence	1422	4	-	organism	short_function
EVM.MODEL.UTG2547.14		motif_sequence	1455	4	-	organism	short_function
EVM.MODEL.UTG2547.14	CTAG-motif	ACTAGCAGAA	1745	9	+	Avena sativa
EVM.MODEL.UTG2547.14	ERE	ATTTCATA	153	8	+	Nicotiana glutinos
EVM.MODEL.UTG2547.14	box S	AGCCACC	1302	7	+	Arabidopsis thaliana
EVM.MODEL.UTG2547.14	MYB	CAACCA	254	6	-	Arabidopsis thaliana
EVM.MODEL.UTG2547.14	MYB	CAACCA	1408	6	+	Arabidopsis thaliana
EVM.MODEL.UTG2547.14	MYB	TAACCA	1653	6	-	Arabidopsis thaliana
EVM.MODEL.UTG2547.14	MYB	CAACAG	2011	6	+	Arabidopsis thaliana
EVM.MODEL.UTG2547.14	MYC	CAATTG	926	6	+	Arabidopsis thaliana
EVM.MODEL.UTG2547.14	MYC	CATTTG	1020	6	-	Arabidopsis thaliana
EVM.MODEL.UTG2547.14	STRE	AGGGG	205	5	+	Arabidopsis thaliana
EVM.MODEL.UTG2547.14	STRE	AGGGG	334	5	+	Arabidopsis thaliana
EVM.MODEL.UTG2547.14	STRE	AGGGG	1873	5	-	Arabidopsis thaliana
EVM.MODEL.UTG2547.14	Unnamed__1	CGTGG	474	5	-	Zea mays
EVM.MODEL.UTG2547.14	Unnamed__1	CGTGG	715	5	+	Zea mays
EVM.MODEL.UTG2547.14	Unnamed__1	tAAGTCATAACTGa	1773	13	-	Oryza sativa
EVM.MODEL.UTG2547.14	Myb	TAACTG	2014	6	-	Arabidopsis thaliana
EVM.MODEL.UTG2547.14	AT~TATA-box	TATATA	733	6	+	Arabidopsis thaliana
EVM.MODEL.UTG2547.14	AT~TATA-box	TATATA	1319	6	-	Arabidopsis thaliana
EVM.MODEL.UTG2547.14	AT~TATA-box	TATATA	1946	6	-	Arabidopsis thaliana
EVM.MODEL.UTG2547.14	AT~TATA-box	TATATA	1948	6	-	Arabidopsis thaliana
EVM.MODEL.UTG2547.14	AT~TATA-box	TATATA	1950	6	-	Arabidopsis thaliana
EVM.MODEL.UTG2547.14	ARE	AAACCA	1325	6	-	Zea mays	cis-acting regulatory element essential for the anaerobic induction
EVM.MODEL.UTG2547.14	ARE	AAACCA	1976	6	+	Zea mays	cis-acting regulatory element essential for the anaerobic induction
EVM.MODEL.UTG2547.14	Box 4	ATTAAT	508	6	+	Petroselinum crispum	part of a conserved DNA module involved in light responsiveness
EVM.MODEL.UTG2547.14	TCA-element	CCATCTTTTT	1386	9	-	Nicotiana tabacum	cis-acting element involved in salicylic acid responsiveness
EVM.MODEL.UTG2547.14	TCA-element	CCATCTTTTT	1860	9	+	Nicotiana tabacum	cis-acting element involved in salicylic acid responsiveness
EVM.MODEL.UTG2547.14	CAAT-box	CAAT	220	4	-	Nicotiana glutinosa
EVM.MODEL.UTG2547.14	CAAT-box	CAAT	376	4	+	Nicotiana glutinosa
EVM.MODEL.UTG2547.14	CAAT-box	CAAAT	408	5	+	Pisum sativum	common cis-acting element in promoter and enhancer regions
EVM.MODEL.UTG2547.14	CAAT-box	CCAAT	423	5	-	Arabidopsis thaliana	common cis-acting element in promoter and enhancer regions
EVM.MODEL.UTG2547.14	CAAT-box	CAAT	459	4	+	Nicotiana glutinosa
EVM.MODEL.UTG2547.14	CAAT-box	CAAT	530	4	-	Nicotiana glutinosa
EVM.MODEL.UTG2547.14	CAAT-box	CCAAT	572	5	+	Arabidopsis thaliana	common cis-acting element in promoter and enhancer regions
EVM.MODEL.UTG2547.14	CAAT-box	CAAT	573	4	+	Nicotiana glutinosa
EVM.MODEL.UTG2547.14	CAAT-box	CAAT	638	4	-	Nicotiana glutinosa
EVM.MODEL.UTG2547.14	CAAT-box	CAAT	738	4	-	Nicotiana glutinosa
EVM.MODEL.UTG2547.14	CAAT-box	CAAAT	809	5	-	Pisum sativum	common cis-acting element in promoter and enhancer regions
EVM.MODEL.UTG2547.14	CAAT-box	CAAT	849	4	-	Nicotiana glutinosa
EVM.MODEL.UTG2547.14	CAAT-box	CAAT	878	4	+	Nicotiana glutinosa
EVM.MODEL.UTG2547.14	CAAT-box	CAAT	926	4	+	Nicotiana glutinosa
EVM.MODEL.UTG2547.14	CAAT-box	CAAT	928	4	-	Nicotiana glutinosa
EVM.MODEL.UTG2547.14	CAAT-box	CAAAT	989	5	+	Pisum sativum	common cis-acting element in promoter and enhancer regions
EVM.MODEL.UTG2547.14	CAAT-box	CAAT	992	4	-	Nicotiana glutinosa
EVM.MODEL.UTG2547.14	CAAT-box	CAAAT	1020	5	+	Pisum sativum	common cis-acting element in promoter and enhancer regions
EVM.MODEL.UTG2547.14	CAAT-box	CAAAT	1044	5	-	Pisum sativum	common cis-acting element in promoter and enhancer regions
EVM.MODEL.UTG2547.14	CAAT-box	CAAAT	1079	5	+	Pisum sativum	common cis-acting element in promoter and enhancer regions
EVM.MODEL.UTG2547.14	CAAT-box	CAAT	1267	4	-	Nicotiana glutinosa
EVM.MODEL.UTG2547.14	CAAT-box	CAAT	1298	4	-	Nicotiana glutinosa
EVM.MODEL.UTG2547.14	CAAT-box	CAAT	1335	4	-	Nicotiana glutinosa
EVM.MODEL.UTG2547.14	CAAT-box	CCAAT	1365	5	-	Arabidopsis thaliana	common cis-acting element in promoter and enhancer regions
EVM.MODEL.UTG2547.14	CAAT-box	CAAAT	1561	5	+	Pisum sativum	common cis-acting element in promoter and enhancer regions
EVM.MODEL.UTG2547.14	CAAT-box	CAAT	1604	4	+	Nicotiana glutinosa
EVM.MODEL.UTG2547.14	CAAT-box	CAAAT	1676	5	+	Pisum sativum	common cis-acting element in promoter and enhancer regions
EVM.MODEL.UTG2547.14	CAAT-box	CAAT	1987	4	+	Nicotiana glutinosa
EVM.MODEL.UTG2547.14	O2-site	GATGACATGG	1891	9	-	Zea mays	cis-acting regulatory element involved in zein metabolism regulation
EVM.MODEL.UTG2547.14	TGA-element	AACGAC	856	6	+	Brassica oleracea	auxin-responsive element
EVM.MODEL.UTG2547.14	TGA-element	AACGAC	2006	6	+	Brassica oleracea	auxin-responsive element
EVM.MODEL.UTG2547.14	Myc	TCTCTTA	728	7	+	Arabidopsis thaliana
EVM.MODEL.UTG2547.14	W box	TTGACC	1816	6	-	Arabidopsis thaliana
EVM.MODEL.UTG2547.14	Unnamed__4	CTCC	208	4	-	Petroselinum hortense
EVM.MODEL.UTG2547.14	Unnamed__4	CTCC	570	4	+	Petroselinum hortense
EVM.MODEL.UTG2547.14	Unnamed__4	CTCC	674	4	+	Petroselinum hortense
EVM.MODEL.UTG2547.14	Unnamed__4	CTCC	1343	4	-	Petroselinum hortense
EVM.MODEL.UTG2547.14	Unnamed__4	CTCC	1395	4	-	Petroselinum hortense
EVM.MODEL.UTG2547.14	Unnamed__4	CTCC	1853	4	+	Petroselinum hortense
EVM.MODEL.UTG2547.14	Unnamed__4	CTCC	1876	4	+	Petroselinum hortense
EVM.MODEL.UTG2547.14	Unnamed__4	CTCC	1889	4	+	Petroselinum hortense
EVM.MODEL.UTG2547.14	Unnamed__4	CTCC	1906	4	+	Petroselinum hortense
EVM.MODEL.UTG2547.14	I-box	cGATAAGGCG	1102	9	-	Zea mays	part of a light responsive element
EVM.MODEL.UTG2547.14	GT1-motif	GGTTAA	784	6	+	Arabidopsis thaliana	light responsive element
EVM.MODEL.UTG2547.14	GT1-motif	GGTTAA	1654	6	+	Arabidopsis thaliana	light responsive element
EVM.MODEL.UTG2547.14	WUN-motif	AAATTTCTT	1562	9	+	Nicotiana glutinosa
EVM.MODEL.UTG2547.14	MYB-like sequence	TAACCA	1653	6	-	Arabidopsis thaliana
EVM.MODEL.UTG2547.14	DRE core	GCCGAC	363	6	+	Arabidopsis thaliana
EVM.MODEL.UTG2547.14	LTR	CCGAAA	552	6	+	Hordeum vulgare	cis-acting element involved in low-temperature responsiveness
EVM.MODEL.UTG2547.14	LTR	CCGAAA	904	6	+	Hordeum vulgare	cis-acting element involved in low-temperature responsiveness
EVM.MODEL.UTG2547.14	LTR	CCGAAA	1917	6	-	Hordeum vulgare	cis-acting element involved in low-temperature responsiveness
EVM.MODEL.UTG2547.14	P-box	CCTTTTG	1032	7	+	Oryza sativa	gibberellin-responsive element
EVM.MODEL.UTG2547.14	ACTCATCCT sequence	ACTCATCCT	181	9	+	Arabidopsis thaliana
EVM.MODEL.UTG2547.14	TATA-box	TATATTTATATTT	61	12	-	Avena sativa	core promoter element around -30 of transcription start
EVM.MODEL.UTG2547.14	TATA-box	ATATAA	63	6	+	Brassica oleracea	core promoter element around -30 of transcription start
EVM.MODEL.UTG2547.14	TATA-box	TATA	64	4	+	Arabidopsis thaliana	core promoter element around -30 of transcription start
EVM.MODEL.UTG2547.14	TATA-box	TATA	70	4	+	Arabidopsis thaliana	core promoter element around -30 of transcription start
EVM.MODEL.UTG2547.14	TATA-box	ATTATA	105	6	+	Brassica napus	core promoter element around -30 of transcription start
EVM.MODEL.UTG2547.14	TATA-box	TATAA	106	5	-	Arabidopsis thaliana	core promoter element around -30 of transcription start
EVM.MODEL.UTG2547.14	TATA-box	TATA	107	4	+	Arabidopsis thaliana	core promoter element around -30 of transcription start
EVM.MODEL.UTG2547.14	TATA-box	TATAAAT	131	7	-	Brassica juncea	core promoter element around -30 of transcription start
EVM.MODEL.UTG2547.14	TATA-box	TATAAA	132	6	-	Helianthus annuus	core promoter element around -30 of transcription start
EVM.MODEL.UTG2547.14	TATA-box	TATAA	133	5	-	Arabidopsis thaliana	core promoter element around -30 of transcription start
EVM.MODEL.UTG2547.14	TATA-box	TATA	134	4	+	Arabidopsis thaliana	core promoter element around -30 of transcription start
EVM.MODEL.UTG2547.14	TATA-box	ATATAA	164	6	+	Brassica oleracea	core promoter element around -30 of transcription start
EVM.MODEL.UTG2547.14	TATA-box	TATA	165	4	+	Arabidopsis thaliana	core promoter element around -30 of transcription start
EVM.MODEL.UTG2547.14	TATA-box	TATA	172	4	+	Arabidopsis thaliana	core promoter element around -30 of transcription start
EVM.MODEL.UTG2547.14	TATA-box	TATAA	265	5	-	Arabidopsis thaliana	core promoter element around -30 of transcription start
EVM.MODEL.UTG2547.14	TATA-box	TATA	266	4	+	Arabidopsis thaliana	core promoter element around -30 of transcription start
EVM.MODEL.UTG2547.14	TATA-box	TATACA	289	6	-	Helianthus annuus	core promoter element around -30 of transcription start
EVM.MODEL.UTG2547.14	TATA-box	TATA	291	4	+	Arabidopsis thaliana	core promoter element around -30 of transcription start
EVM.MODEL.UTG2547.14	TATA-box	TATA	331	4	+	Arabidopsis thaliana	core promoter element around -30 of transcription start
EVM.MODEL.UTG2547.14	TATA-box	ATATAA	411	6	+	Brassica oleracea	core promoter element around -30 of transcription start
EVM.MODEL.UTG2547.14	TATA-box	TATA	412	4	+	Arabidopsis thaliana	core promoter element around -30 of transcription start
EVM.MODEL.UTG2547.14	TATA-box	TATACA	490	6	-	Helianthus annuus	core promoter element around -30 of transcription start
EVM.MODEL.UTG2547.14	TATA-box	TATA	492	4	+	Arabidopsis thaliana	core promoter element around -30 of transcription start
EVM.MODEL.UTG2547.14	TATA-box	ATATAT	512	6	+	Brassica napus	core promoter element around -30 of transcription start
EVM.MODEL.UTG2547.14	TATA-box	TATA	513	4	+	Arabidopsis thaliana	core promoter element around -30 of transcription start
EVM.MODEL.UTG2547.14	TATA-box	TATA	576	4	+	Arabidopsis thaliana	core promoter element around -30 of transcription start
EVM.MODEL.UTG2547.14	TATA-box	TACATAAA	578	8	+	Oryza sativa	core promoter element around -30 of transcription start
EVM.MODEL.UTG2547.14	TATA-box	TATA	611	4	+	Arabidopsis thaliana	core promoter element around -30 of transcription start
EVM.MODEL.UTG2547.14	TATA-box	TATATAA	732	7	-	Arabidopsis thaliana	core promoter element around -30 of transcription start
EVM.MODEL.UTG2547.14	TATA-box	TATATA	733	6	+	Arabidopsis thaliana	core promoter element around -30 of transcription start
EVM.MODEL.UTG2547.14	TATA-box	ATATAT	734	6	+	Brassica napus	core promoter element around -30 of transcription start
EVM.MODEL.UTG2547.14	TATA-box	TATA	735	4	+	Arabidopsis thaliana	core promoter element around -30 of transcription start
EVM.MODEL.UTG2547.14	TATA-box	ATTATA	823	6	+	Brassica napus	core promoter element around -30 of transcription start
EVM.MODEL.UTG2547.14	TATA-box	TATAA	824	5	-	Arabidopsis thaliana	core promoter element around -30 of transcription start
EVM.MODEL.UTG2547.14	TATA-box	TATA	825	4	+	Arabidopsis thaliana	core promoter element around -30 of transcription start
EVM.MODEL.UTG2547.14	TATA-box	TATAA	1106	5	-	Arabidopsis thaliana	core promoter element around -30 of transcription start
EVM.MODEL.UTG2547.14	TATA-box	TATA	1107	4	-	Arabidopsis thaliana	core promoter element around -30 of transcription start
EVM.MODEL.UTG2547.14	TATA-box	ATTATA	1222	6	+	Brassica napus	core promoter element around -30 of transcription start
EVM.MODEL.UTG2547.14	TATA-box	TATAA	1223	5	-	Arabidopsis thaliana	core promoter element around -30 of transcription start
EVM.MODEL.UTG2547.14	TATA-box	TATA	1224	4	-	Arabidopsis thaliana	core promoter element around -30 of transcription start
EVM.MODEL.UTG2547.14	TATA-box	TACAAAA	1287	7	-	Oryza sativa	core promoter element around -30 of transcription start
EVM.MODEL.UTG2547.14	TATA-box	ATATAT	1318	6	-	Brassica napus	core promoter element around -30 of transcription start
EVM.MODEL.UTG2547.14	TATA-box	TATATA	1319	6	-	Arabidopsis thaliana	core promoter element around -30 of transcription start
EVM.MODEL.UTG2547.14	TATA-box	ATATAT	1320	6	-	Brassica napus	core promoter element around -30 of transcription start
EVM.MODEL.UTG2547.14	TATA-box	TATA	1321	4	-	Arabidopsis thaliana	core promoter element around -30 of transcription start
EVM.MODEL.UTG2547.14	TATA-box	ATATAA	1413	6	+	Brassica oleracea	core promoter element around -30 of transcription start
EVM.MODEL.UTG2547.14	TATA-box	TATA	1414	4	-	Arabidopsis thaliana	core promoter element around -30 of transcription start
EVM.MODEL.UTG2547.14	TATA-box	TATAAATA	1467	8	-	Daucus carota	core promoter element around -30 of transcription start
EVM.MODEL.UTG2547.14	TATA-box	TATAAAT	1468	7	-	Brassica juncea	core promoter element around -30 of transcription start
EVM.MODEL.UTG2547.14	TATA-box	TATAAA	1469	6	-	Helianthus annuus	core promoter element around -30 of transcription start
EVM.MODEL.UTG2547.14	TATA-box	TATAA	1470	5	-	Arabidopsis thaliana	core promoter element around -30 of transcription start
EVM.MODEL.UTG2547.14	TATA-box	TATA	1471	4	-	Arabidopsis thaliana	core promoter element around -30 of transcription start
EVM.MODEL.UTG2547.14	TATA-box	TATAAA	1569	6	-	Helianthus annuus	core promoter element around -30 of transcription start
EVM.MODEL.UTG2547.14	TATA-box	TATAA	1570	5	-	Arabidopsis thaliana	core promoter element around -30 of transcription start
EVM.MODEL.UTG2547.14	TATA-box	TATA	1571	4	-	Arabidopsis thaliana	core promoter element around -30 of transcription start
EVM.MODEL.UTG2547.14	TATA-box	TATAAAA	1578	7	-	Pisum sativum	core promoter element around -30 of transcription start
EVM.MODEL.UTG2547.14	TATA-box	TATAAA	1579	6	-	Helianthus annuus	core promoter element around -30 of transcription start
EVM.MODEL.UTG2547.14	TATA-box	TATAA	1580	5	-	Arabidopsis thaliana	core promoter element around -30 of transcription start
EVM.MODEL.UTG2547.14	TATA-box	TATA	1581	4	-	Arabidopsis thaliana	core promoter element around -30 of transcription start
EVM.MODEL.UTG2547.14	TATA-box	ATATAT	1610	6	-	Brassica napus	core promoter element around -30 of transcription start
EVM.MODEL.UTG2547.14	TATA-box	TATA	1611	4	-	Arabidopsis thaliana	core promoter element around -30 of transcription start
EVM.MODEL.UTG2547.14	TATA-box	ATTATA	1614	6	+	Brassica napus	core promoter element around -30 of transcription start
EVM.MODEL.UTG2547.14	TATA-box	TATAA	1615	5	-	Arabidopsis thaliana	core promoter element around -30 of transcription start
EVM.MODEL.UTG2547.14	TATA-box	TATA	1616	4	-	Arabidopsis thaliana	core promoter element around -30 of transcription start
EVM.MODEL.UTG2547.14	TATA-box	TATAAA	1639	6	-	Helianthus annuus	core promoter element around -30 of transcription start
EVM.MODEL.UTG2547.14	TATA-box	TATAA	1640	5	-	Arabidopsis thaliana	core promoter element around -30 of transcription start
EVM.MODEL.UTG2547.14	TATA-box	TATA	1641	4	-	Arabidopsis thaliana	core promoter element around -30 of transcription start
EVM.MODEL.UTG2547.14	TATA-box	ATTATA	1687	6	+	Brassica napus	core promoter element around -30 of transcription start
EVM.MODEL.UTG2547.14	TATA-box	TATAA	1688	5	-	Arabidopsis thaliana	core promoter element around -30 of transcription start
EVM.MODEL.UTG2547.14	TATA-box	TATA	1689	4	-	Arabidopsis thaliana	core promoter element around -30 of transcription start
EVM.MODEL.UTG2547.14	TATA-box	ATATAT	1716	6	-	Brassica napus	core promoter element around -30 of transcription start
EVM.MODEL.UTG2547.14	TATA-box	TATA	1717	4	-	Arabidopsis thaliana	core promoter element around -30 of transcription start
EVM.MODEL.UTG2547.14	TATA-box	TATAA	1733	5	-	Arabidopsis thaliana	core promoter element around -30 of transcription start
EVM.MODEL.UTG2547.14	TATA-box	TATA	1734	4	-	Arabidopsis thaliana	core promoter element around -30 of transcription start
EVM.MODEL.UTG2547.14	TATA-box	ATATAT	1945	6	-	Brassica napus	core promoter element around -30 of transcription start
EVM.MODEL.UTG2547.14	TATA-box	TATATA	1946	6	-	Arabidopsis thaliana	core promoter element around -30 of transcription start
EVM.MODEL.UTG2547.14	TATA-box	ATATAT	1947	6	-	Brassica napus	core promoter element around -30 of transcription start
EVM.MODEL.UTG2547.14	TATA-box	TATATA	1948	6	-	Arabidopsis thaliana	core promoter element around -30 of transcription start
EVM.MODEL.UTG2547.14	TATA-box	ATATAT	1949	6	-	Brassica napus	core promoter element around -30 of transcription start
EVM.MODEL.UTG2547.14	TATA-box	TATATA	1950	6	-	Arabidopsis thaliana	core promoter element around -30 of transcription start
EVM.MODEL.UTG2547.14	TATA-box	TATA	1952	4	-	Arabidopsis thaliana	core promoter element around -30 of transcription start
EVM.MODEL.UTG2547.14	TATA-box	ATTATA	1957	6	+	Brassica napus	core promoter element around -30 of transcription start
EVM.MODEL.UTG2547.14	TATA-box	TATAA	1958	5	-	Arabidopsis thaliana	core promoter element around -30 of transcription start
EVM.MODEL.UTG2547.14	TATA-box	TATA	1959	4	-	Arabidopsis thaliana	core promoter element around -30 of transcription start
EVM.MODEL.UTG2547.14	TATA-box	TATAA	2017	5	-	Arabidopsis thaliana	core promoter element around -30 of transcription start
EVM.MODEL.UTG2547.14	TATA-box	TATA	2018	4	-	Arabidopsis thaliana	core promoter element around -30 of transcription start
EVM.MODEL.UTG2547.14	AT-rich element	ATAGAAATCAA	112	10	+	Glycine max	binding site of AT-rich DNA binding protein (ATBP-1)
EVM.MODEL.UTG2547.14	Myb-binding site	CAACAG	2011	6	+	Nicotiana tabacum
EVM.MODEL.UTG2547.14	TGACG-motif	TGACG	359	5	+	Hordeum vulgare	cis-acting regulatory element involved in the MeJA-responsiveness
EVM.MODEL.UTG2547.14	as-1	TGACG	359	5	+	Arabidopsis thaliana
EVM.MODEL.UTG4527.1	WUN-motif	TTATTACAT	1649	9	-	Nicotiana glutinosa
EVM.MODEL.UTG4527.1	MYB-like sequence	TAACCA	290	6	+	Arabidopsis thaliana
EVM.MODEL.UTG4527.1	MYB-like sequence	TAACCA	1239	6	+	Arabidopsis thaliana
EVM.MODEL.UTG4527.1	GT1-motif	GGTTAA	1357	6	-	Arabidopsis thaliana	light responsive element
EVM.MODEL.UTG4527.1	ABRE	ACGTG	1189	5	+	Arabidopsis thaliana	cis-acting element involved in the abscisic acid responsiveness
EVM.MODEL.UTG4527.1	MYB recognition site	CCGTTG	852	6	+	Arabidopsis thaliana
EVM.MODEL.UTG4527.1	CCAAT-box	CAACGG	852	6	-	Hordeum vulgare	MYBHv1 binding site
EVM.MODEL.UTG4527.1	Unnamed__4	CTCC	1789	4	+	Petroselinum hortense
EVM.MODEL.UTG4527.1	Unnamed__4	CTCC	1805	4	+	Petroselinum hortense
EVM.MODEL.UTG4527.1	Unnamed__4	CTCC	1819	4	+	Petroselinum hortense
EVM.MODEL.UTG4527.1	W box	TTGACC	636	6	+	Arabidopsis thaliana
EVM.MODEL.UTG4527.1	I-box	cCATATCCAAT	1639	10	-	Flaveria trinervia	part of a light responsive element
EVM.MODEL.UTG4527.1	AAGAA-motif	GAAAGAA	739	7	+	Avena sativa
EVM.MODEL.UTG4527.1	Myb-binding site	CAACAG	1004	6	+	Nicotiana tabacum
EVM.MODEL.UTG4527.1	G-box	TACGTG	1188	6	+	Arabidopsis thaliana	cis-acting regulatory element involved in light responsiveness
EVM.MODEL.UTG4527.1	G-Box	TCCACATGGCA	206	10	+	Triticum aestivum	cis-acting regulatory element involved in light responsiveness
EVM.MODEL.UTG4527.1	TATA-box	TAAAGATT	192	8	+	Arabidopsis thaliana	core promoter element around -30 of transcription start
EVM.MODEL.UTG4527.1	TATA-box	TATACA	227	6	-	Helianthus annuus	core promoter element around -30 of transcription start
EVM.MODEL.UTG4527.1	TATA-box	TATA	229	4	+	Arabidopsis thaliana	core promoter element around -30 of transcription start
EVM.MODEL.UTG4527.1	TATA-box	TATAAAA	266	7	-	Pisum sativum	core promoter element around -30 of transcription start
EVM.MODEL.UTG4527.1	TATA-box	TATAAA	267	6	-	Helianthus annuus	core promoter element around -30 of transcription start
EVM.MODEL.UTG4527.1	TATA-box	TATAA	268	5	-	Arabidopsis thaliana	core promoter element around -30 of transcription start
EVM.MODEL.UTG4527.1	TATA-box	TATA	269	4	+	Arabidopsis thaliana	core promoter element around -30 of transcription start
EVM.MODEL.UTG4527.1	TATA-box	TACAAAA	341	7	-	Oryza sativa	core promoter element around -30 of transcription start
EVM.MODEL.UTG4527.1	TATA-box	TATA	371	4	+	Arabidopsis thaliana	core promoter element around -30 of transcription start
EVM.MODEL.UTG4527.1	TATA-box	TATAAAT	375	7	-	Brassica juncea	core promoter element around -30 of transcription start
EVM.MODEL.UTG4527.1	TATA-box	TATAAA	376	6	-	Helianthus annuus	core promoter element around -30 of transcription start
EVM.MODEL.UTG4527.1	TATA-box	TATAA	377	5	-	Arabidopsis thaliana	core promoter element around -30 of transcription start
EVM.MODEL.UTG4527.1	TATA-box	TATA	378	4	+	Arabidopsis thaliana	core promoter element around -30 of transcription start
EVM.MODEL.UTG4527.1	TATA-box	TATAAAA	389	7	-	Pisum sativum	core promoter element around -30 of transcription start
EVM.MODEL.UTG4527.1	TATA-box	TATAAA	390	6	-	Helianthus annuus	core promoter element around -30 of transcription start
EVM.MODEL.UTG4527.1	TATA-box	TATAA	391	5	-	Arabidopsis thaliana	core promoter element around -30 of transcription start
EVM.MODEL.UTG4527.1	TATA-box	TATA	392	4	+	Arabidopsis thaliana	core promoter element around -30 of transcription start
EVM.MODEL.UTG4527.1	TATA-box	TATATA	475	6	+	Arabidopsis thaliana	core promoter element around -30 of transcription start
EVM.MODEL.UTG4527.1	TATA-box	ATATAA	476	6	+	Brassica oleracea	core promoter element around -30 of transcription start
EVM.MODEL.UTG4527.1	TATA-box	TATA	477	4	+	Arabidopsis thaliana	core promoter element around -30 of transcription start
EVM.MODEL.UTG4527.1	TATA-box	TATAAA	533	6	-	Helianthus annuus	core promoter element around -30 of transcription start
EVM.MODEL.UTG4527.1	TATA-box	TATAA	534	5	-	Arabidopsis thaliana	core promoter element around -30 of transcription start
EVM.MODEL.UTG4527.1	TATA-box	TATA	535	4	+	Arabidopsis thaliana	core promoter element around -30 of transcription start
EVM.MODEL.UTG4527.1	TATA-box	TATAAAA	579	7	-	Pisum sativum	core promoter element around -30 of transcription start
EVM.MODEL.UTG4527.1	TATA-box	TATAAA	580	6	-	Helianthus annuus	core promoter element around -30 of transcription start
EVM.MODEL.UTG4527.1	TATA-box	TATAA	581	5	-	Arabidopsis thaliana	core promoter element around -30 of transcription start
EVM.MODEL.UTG4527.1	TATA-box	TATA	582	4	+	Arabidopsis thaliana	core promoter element around -30 of transcription start
EVM.MODEL.UTG4527.1	TATA-box	TATA	592	4	+	Arabidopsis thaliana	core promoter element around -30 of transcription start
EVM.MODEL.UTG4527.1	TATA-box	TATA	775	4	+	Arabidopsis thaliana	core promoter element around -30 of transcription start
EVM.MODEL.UTG4527.1	TATA-box	TATACA	901	6	-	Helianthus annuus	core promoter element around -30 of transcription start
EVM.MODEL.UTG4527.1	TATA-box	TATA	903	4	+	Arabidopsis thaliana	core promoter element around -30 of transcription start
EVM.MODEL.UTG4527.1	TATA-box	TATA	1000	4	-	Arabidopsis thaliana	core promoter element around -30 of transcription start
EVM.MODEL.UTG4527.1	TATA-box	TATACA	1094	6	-	Helianthus annuus	core promoter element around -30 of transcription start
EVM.MODEL.UTG4527.1	TATA-box	TATA	1096	4	-	Arabidopsis thaliana	core promoter element around -30 of transcription start
EVM.MODEL.UTG4527.1	TATA-box	TATA	1183	4	-	Arabidopsis thaliana	core promoter element around -30 of transcription start
EVM.MODEL.UTG4527.1	TATA-box	TATA	1221	4	-	Arabidopsis thaliana	core promoter element around -30 of transcription start
EVM.MODEL.UTG4527.1	TATA-box	ATTATA	1266	6	+	Brassica napus	core promoter element around -30 of transcription start
EVM.MODEL.UTG4527.1	TATA-box	TATAA	1267	5	-	Arabidopsis thaliana	core promoter element around -30 of transcription start
EVM.MODEL.UTG4527.1	TATA-box	TATA	1268	4	-	Arabidopsis thaliana	core promoter element around -30 of transcription start
EVM.MODEL.UTG4527.1	TATA-box	ATTATA	1277	6	+	Brassica napus	core promoter element around -30 of transcription start
EVM.MODEL.UTG4527.1	TATA-box	TATAA	1278	5	-	Arabidopsis thaliana	core promoter element around -30 of transcription start
EVM.MODEL.UTG4527.1	TATA-box	TATA	1279	4	-	Arabidopsis thaliana	core promoter element around -30 of transcription start
EVM.MODEL.UTG4527.1	TATA-box	ATATAT	1304	6	-	Brassica napus	core promoter element around -30 of transcription start
EVM.MODEL.UTG4527.1	TATA-box	TATATA	1305	6	-	Arabidopsis thaliana	core promoter element around -30 of transcription start
EVM.MODEL.UTG4527.1	TATA-box	ATATAT	1306	6	-	Brassica napus	core promoter element around -30 of transcription start
EVM.MODEL.UTG4527.1	TATA-box	TATATA	1307	6	-	Arabidopsis thaliana	core promoter element around -30 of transcription start
EVM.MODEL.UTG4527.1	TATA-box	TATA	1309	4	-	Arabidopsis thaliana	core promoter element around -30 of transcription start
EVM.MODEL.UTG4527.1	TATA-box	TAAAGATT	1517	8	+	Arabidopsis thaliana	core promoter element around -30 of transcription start
EVM.MODEL.UTG4527.1	TATA-box	ATATAA	1533	6	+	Brassica oleracea	core promoter element around -30 of transcription start
EVM.MODEL.UTG4527.1	TATA-box	TATA	1534	4	-	Arabidopsis thaliana	core promoter element around -30 of transcription start
EVM.MODEL.UTG4527.1	TATA-box	ATATAA	1547	6	+	Brassica oleracea	core promoter element around -30 of transcription start
EVM.MODEL.UTG4527.1	TATA-box	TATA	1548	4	-	Arabidopsis thaliana	core promoter element around -30 of transcription start
EVM.MODEL.UTG4527.1	TATA-box	TATA	1613	4	-	Arabidopsis thaliana	core promoter element around -30 of transcription start
EVM.MODEL.UTG4527.1	TATA-box	TATACA	1621	6	-	Helianthus annuus	core promoter element around -30 of transcription start
EVM.MODEL.UTG4527.1	TATA-box	TATA	1623	4	-	Arabidopsis thaliana	core promoter element around -30 of transcription start
EVM.MODEL.UTG4527.1	TATA-box	TATACA	1634	6	-	Helianthus annuus	core promoter element around -30 of transcription start
EVM.MODEL.UTG4527.1	TATA-box	TATA	1636	4	-	Arabidopsis thaliana	core promoter element around -30 of transcription start
EVM.MODEL.UTG4527.1	TATA-box	TATAAAT	1683	7	-	Brassica juncea	core promoter element around -30 of transcription start
EVM.MODEL.UTG4527.1	TATA-box	TATAAA	1684	6	-	Helianthus annuus	core promoter element around -30 of transcription start
EVM.MODEL.UTG4527.1	TATA-box	TATAA	1685	5	-	Arabidopsis thaliana	core promoter element around -30 of transcription start
EVM.MODEL.UTG4527.1	TATA-box	TATA	1686	4	-	Arabidopsis thaliana	core promoter element around -30 of transcription start
EVM.MODEL.UTG4527.1	TATA-box	TATA	1722	4	-	Arabidopsis thaliana	core promoter element around -30 of transcription start
EVM.MODEL.UTG4527.1	TATA-box	TATATA	1832	6	-	Arabidopsis thaliana	core promoter element around -30 of transcription start
EVM.MODEL.UTG4527.1	TATA-box	ATATAT	1833	6	-	Brassica napus	core promoter element around -30 of transcription start
EVM.MODEL.UTG4527.1	TATA-box	TATATA	1834	6	-	Arabidopsis thaliana	core promoter element around -30 of transcription start
EVM.MODEL.UTG4527.1	TATA-box	TATA	1836	4	-	Arabidopsis thaliana	core promoter element around -30 of transcription start
EVM.MODEL.UTG4527.1	Gap-box	CAAATGAA(A/G)A	1073	9.5	+	Arabidopsis thaliana	part of a light responsive element
EVM.MODEL.UTG4527.1	ERE	ATTTTAAA	101	8	+	Nicotiana glutinos
EVM.MODEL.UTG4527.1	MRE	AACCTAA	631	7	-	Petroselinum crispum	MYB binding site involved in light responsiveness
EVM.MODEL.UTG4527.1		motif_sequence	232	4	+	organism	short_function
EVM.MODEL.UTG4527.1		motif_sequence	519	4	-	organism	short_function
EVM.MODEL.UTG4527.1		motif_sequence	652	4	-	organism	short_function
EVM.MODEL.UTG4527.1		motif_sequence	743	4	-	organism	short_function
EVM.MODEL.UTG4527.1		motif_sequence	749	4	-	organism	short_function
EVM.MODEL.UTG4527.1		motif_sequence	836	4	-	organism	short_function
EVM.MODEL.UTG4527.1		motif_sequence	1037	4	-	organism	short_function
EVM.MODEL.UTG4527.1		motif_sequence	1193	4	-	organism	short_function
EVM.MODEL.UTG4527.1		motif_sequence	1453	4	-	organism	short_function
EVM.MODEL.UTG4527.1	Unnamed__6	taTAAATATct	1653	10	+	Zea mays
EVM.MODEL.UTG4527.1	Box 4	ATTAAT	138	6	+	Petroselinum crispum	part of a conserved DNA module involved in light responsiveness
EVM.MODEL.UTG4527.1	Box 4	ATTAAT	310	6	+	Petroselinum crispum	part of a conserved DNA module involved in light responsiveness
EVM.MODEL.UTG4527.1	Box 4	ATTAAT	314	6	+	Petroselinum crispum	part of a conserved DNA module involved in light responsiveness
EVM.MODEL.UTG4527.1	Box 4	ATTAAT	420	6	+	Petroselinum crispum	part of a conserved DNA module involved in light responsiveness
EVM.MODEL.UTG4527.1	Box 4	ATTAAT	1855	6	-	Petroselinum crispum	part of a conserved DNA module involved in light responsiveness
EVM.MODEL.UTG4527.1	ARE	AAACCA	384	6	-	Zea mays	cis-acting regulatory element essential for the anaerobic induction
EVM.MODEL.UTG4527.1	ARE	AAACCA	821	6	+	Zea mays	cis-acting regulatory element essential for the anaerobic induction
EVM.MODEL.UTG4527.1	ARE	AAACCA	1080	6	+	Zea mays	cis-acting regulatory element essential for the anaerobic induction
EVM.MODEL.UTG4527.1	ARE	AAACCA	1891	6	+	Zea mays	cis-acting regulatory element essential for the anaerobic induction
EVM.MODEL.UTG4527.1	CAAT-box	CAAT	52	4	-	Nicotiana glutinosa
EVM.MODEL.UTG4527.1	CAAT-box	CAAT	63	4	+	Nicotiana glutinosa
EVM.MODEL.UTG4527.1	CAAT-box	CAAAT	76	5	+	Pisum sativum	common cis-acting element in promoter and enhancer regions
EVM.MODEL.UTG4527.1	CAAT-box	CCAAT	286	5	+	Arabidopsis thaliana	common cis-acting element in promoter and enhancer regions
EVM.MODEL.UTG4527.1	CAAT-box	CAAT	287	4	+	Nicotiana glutinosa
EVM.MODEL.UTG4527.1	CAAT-box	CAAT	295	4	-	Nicotiana glutinosa
EVM.MODEL.UTG4527.1	CAAT-box	CAAAT	358	5	+	Pisum sativum	common cis-acting element in promoter and enhancer regions
EVM.MODEL.UTG4527.1	CAAT-box	TGCCAAC	362	7	+	Petunia hybrida	common cis-acting element in promoter and enhancer regions
EVM.MODEL.UTG4527.1	CAAT-box	CAAAT	381	5	-	Pisum sativum	common cis-acting element in promoter and enhancer regions
EVM.MODEL.UTG4527.1	CAAT-box	CAAT	426	4	+	Nicotiana glutinosa
EVM.MODEL.UTG4527.1	CAAT-box	CAAAT	547	5	+	Pisum sativum	common cis-acting element in promoter and enhancer regions
EVM.MODEL.UTG4527.1	CAAT-box	CAAAT	568	5	+	Pisum sativum	common cis-acting element in promoter and enhancer regions
EVM.MODEL.UTG4527.1	CAAT-box	CAAAT	609	5	-	Pisum sativum	common cis-acting element in promoter and enhancer regions
EVM.MODEL.UTG4527.1	CAAT-box	CAAT	627	4	-	Nicotiana glutinosa
EVM.MODEL.UTG4527.1	CAAT-box	CAAT	691	4	+	Nicotiana glutinosa
EVM.MODEL.UTG4527.1	CAAT-box	CCAAT	731	5	+	Arabidopsis thaliana	common cis-acting element in promoter and enhancer regions
EVM.MODEL.UTG4527.1	CAAT-box	CAAT	732	4	+	Nicotiana glutinosa
EVM.MODEL.UTG4527.1	CAAT-box	CAAT	805	4	+	Nicotiana glutinosa
EVM.MODEL.UTG4527.1	CAAT-box	CCAAT	873	5	+	Arabidopsis thaliana	common cis-acting element in promoter and enhancer regions
EVM.MODEL.UTG4527.1	CAAT-box	CAAT	874	4	+	Nicotiana glutinosa
EVM.MODEL.UTG4527.1	CAAT-box	CAAT	888	4	+	Nicotiana glutinosa
EVM.MODEL.UTG4527.1	CAAT-box	CAAT	1029	4	+	Nicotiana glutinosa
EVM.MODEL.UTG4527.1	CAAT-box	CAAT	1046	4	+	Nicotiana glutinosa
EVM.MODEL.UTG4527.1	CAAT-box	CAAAT	1073	5	+	Pisum sativum	common cis-acting element in promoter and enhancer regions
EVM.MODEL.UTG4527.1	CAAT-box	CAAAT	1232	5	+	Pisum sativum	common cis-acting element in promoter and enhancer regions
EVM.MODEL.UTG4527.1	CAAT-box	CAAT	1286	4	-	Nicotiana glutinosa
EVM.MODEL.UTG4527.1	CAAT-box	CCAAT	1366	5	-	Arabidopsis thaliana	common cis-acting element in promoter and enhancer regions
EVM.MODEL.UTG4527.1	CAAT-box	CAAAT	1396	5	+	Pisum sativum	common cis-acting element in promoter and enhancer regions
EVM.MODEL.UTG4527.1	CAAT-box	CAAT	1408	4	-	Nicotiana glutinosa
EVM.MODEL.UTG4527.1	CAAT-box	CAAAT	1457	5	-	Pisum sativum	common cis-acting element in promoter and enhancer regions
EVM.MODEL.UTG4527.1	CAAT-box	TGCAAATCT	1464	9	-	Brassica juncea	common cis-acting element in promoter and enhancer regions
EVM.MODEL.UTG4527.1	CAAT-box	CAAAT	1466	5	-	Pisum sativum	common cis-acting element in promoter and enhancer regions
EVM.MODEL.UTG4527.1	CAAT-box	CAAT	1527	4	+	Nicotiana glutinosa
EVM.MODEL.UTG4527.1	CAAT-box	CAAAT	1581	5	-	Pisum sativum	common cis-acting element in promoter and enhancer regions
EVM.MODEL.UTG4527.1	CAAT-box	CCAAT	1639	5	-	Arabidopsis thaliana	common cis-acting element in promoter and enhancer regions
EVM.MODEL.UTG4527.1	CAAT-box	CAACCAACTCC	1812	10	+	Arabidopsis thaliana	common cis-acting element in promoter and enhancer regions
EVM.MODEL.UTG4527.1	CAAT-box	TGCAAATCT	1845	9	-	Brassica juncea	common cis-acting element in promoter and enhancer regions
EVM.MODEL.UTG4527.1	CAAT-box	CAAAT	1847	5	-	Pisum sativum	common cis-acting element in promoter and enhancer regions
EVM.MODEL.UTG4527.1	CAAT-box	CAAAT	1852	5	+	Pisum sativum	common cis-acting element in promoter and enhancer regions
EVM.MODEL.UTG4527.1	CAAT-box	CAAT	1861	4	+	Nicotiana glutinosa
EVM.MODEL.UTG4527.1	CAAT-box	CAAAT	1877	5	+	Pisum sativum	common cis-acting element in promoter and enhancer regions
EVM.MODEL.UTG4527.1	TATA	TATAAAAT	578	8	-	Arabidopsis thaliana
EVM.MODEL.UTG4527.1	MYC	CATGTG	208	6	-	Arabidopsis thaliana
EVM.MODEL.UTG4527.1	MYC	CATGTG	223	6	-	Arabidopsis thaliana
EVM.MODEL.UTG4527.1	MYC	CATGTG	237	6	-	Arabidopsis thaliana
EVM.MODEL.UTG4527.1	MYC	CATTTG	358	6	-	Arabidopsis thaliana
EVM.MODEL.UTG4527.1	MYC	CATGTG	1063	6	-	Arabidopsis thaliana
EVM.MODEL.UTG4527.1	MYC	CATTTG	1073	6	-	Arabidopsis thaliana
EVM.MODEL.UTG4527.1	MYC	CATTTG	1396	6	-	Arabidopsis thaliana
EVM.MODEL.UTG4527.1	ABRE3a	TACGTG	1188	6	+	Zea mays
EVM.MODEL.UTG4527.1	MYB	TAACCA	290	6	+	Arabidopsis thaliana
EVM.MODEL.UTG4527.1	MYB	CAACAG	1004	6	+	Arabidopsis thaliana
EVM.MODEL.UTG4527.1	MYB	TAACCA	1239	6	+	Arabidopsis thaliana
EVM.MODEL.UTG4527.1	MYB	CAACCA	1378	6	-	Arabidopsis thaliana
EVM.MODEL.UTG4527.1	MYB	CAACCA	1442	6	-	Arabidopsis thaliana
EVM.MODEL.UTG4527.1	STRE	AGGGG	1351	5	-	Arabidopsis thaliana
EVM.MODEL.UTG4527.1	ABRE4	CACGTA	1188	6	-	Zea mays
EVM.MODEL.UTG4527.1	GARE-motif	TCTGTTG	1004	7	-	Brassica oleracea	gibberellin-responsive element
EVM.MODEL.UTG4527.1	AT~TATA-box	TATATA	475	6	+	Arabidopsis thaliana
EVM.MODEL.UTG4527.1	AT~TATA-box	TATATA	1305	6	-	Arabidopsis thaliana
EVM.MODEL.UTG4527.1	AT~TATA-box	TATATA	1307	6	-	Arabidopsis thaliana
EVM.MODEL.UTG4527.1	AT~TATA-box	TATATA	1832	6	-	Arabidopsis thaliana
EVM.MODEL.UTG4527.1	AT~TATA-box	TATATA	1834	6	-	Arabidopsis thaliana
EVM.MODEL.UTG4653.20	ARE	AAACCA	660	6	+	Zea mays	cis-acting regulatory element essential for the anaerobic induction
EVM.MODEL.UTG4653.20	ARE	AAACCA	1034	6	+	Zea mays	cis-acting regulatory element essential for the anaerobic induction
EVM.MODEL.UTG4653.20	ARE	AAACCA	1250	6	-	Zea mays	cis-acting regulatory element essential for the anaerobic induction
EVM.MODEL.UTG4653.20	ARE	AAACCA	1430	6	-	Zea mays	cis-acting regulatory element essential for the anaerobic induction
EVM.MODEL.UTG4653.20	ARE	AAACCA	1981	6	+	Zea mays	cis-acting regulatory element essential for the anaerobic induction
EVM.MODEL.UTG4653.20	Box 4	ATTAAT	1266	6	-	Petroselinum crispum	part of a conserved DNA module involved in light responsiveness
EVM.MODEL.UTG4653.20	Box 4	ATTAAT	1296	6	-	Petroselinum crispum	part of a conserved DNA module involved in light responsiveness
EVM.MODEL.UTG4653.20	Box 4	ATTAAT	1481	6	-	Petroselinum crispum	part of a conserved DNA module involved in light responsiveness
EVM.MODEL.UTG4653.20	O2-site	GATGACATGG	1405	9	-	Zea mays	cis-acting regulatory element involved in zein metabolism regulation
EVM.MODEL.UTG4653.20	TATA	TATAAAAT	1564	8	+	Arabidopsis thaliana
EVM.MODEL.UTG4653.20	CAAT-box	CAAAT	102	5	+	Pisum sativum	common cis-acting element in promoter and enhancer regions
EVM.MODEL.UTG4653.20	CAAT-box	CAAAT	186	5	+	Pisum sativum	common cis-acting element in promoter and enhancer regions
EVM.MODEL.UTG4653.20	CAAT-box	CAAT	278	4	+	Nicotiana glutinosa
EVM.MODEL.UTG4653.20	CAAT-box	CAAT	301	4	+	Nicotiana glutinosa
EVM.MODEL.UTG4653.20	CAAT-box	CAAT	374	4	-	Nicotiana glutinosa
EVM.MODEL.UTG4653.20	CAAT-box	CAAAT	481	5	+	Pisum sativum	common cis-acting element in promoter and enhancer regions
EVM.MODEL.UTG4653.20	CAAT-box	CAAT	636	4	-	Nicotiana glutinosa
EVM.MODEL.UTG4653.20	CAAT-box	CAAT	795	4	-	Nicotiana glutinosa
EVM.MODEL.UTG4653.20	CAAT-box	CAAT	799	4	-	Nicotiana glutinosa
EVM.MODEL.UTG4653.20	CAAT-box	CAAT	816	4	+	Nicotiana glutinosa
EVM.MODEL.UTG4653.20	CAAT-box	CCAAT	845	5	-	Arabidopsis thaliana	common cis-acting element in promoter and enhancer regions
EVM.MODEL.UTG4653.20	CAAT-box	CAAAT	888	5	-	Pisum sativum	common cis-acting element in promoter and enhancer regions
EVM.MODEL.UTG4653.20	CAAT-box	CAAT	930	4	+	Nicotiana glutinosa
EVM.MODEL.UTG4653.20	CAAT-box	CAAAT	996	5	-	Pisum sativum	common cis-acting element in promoter and enhancer regions
EVM.MODEL.UTG4653.20	CAAT-box	CAAT	1084	4	+	Nicotiana glutinosa
EVM.MODEL.UTG4653.20	CAAT-box	CAAAT	1102	5	+	Pisum sativum	common cis-acting element in promoter and enhancer regions
EVM.MODEL.UTG4653.20	CAAT-box	CCAAT	1114	5	+	Arabidopsis thaliana	common cis-acting element in promoter and enhancer regions
EVM.MODEL.UTG4653.20	CAAT-box	CAAT	1115	4	+	Nicotiana glutinosa
EVM.MODEL.UTG4653.20	CAAT-box	CAAT	1292	4	+	Nicotiana glutinosa
EVM.MODEL.UTG4653.20	CAAT-box	CCAAT	1418	5	-	Arabidopsis thaliana	common cis-acting element in promoter and enhancer regions
EVM.MODEL.UTG4653.20	CAAT-box	CAAT	1440	4	+	Nicotiana glutinosa
EVM.MODEL.UTG4653.20	CAAT-box	CAAT	1455	4	-	Nicotiana glutinosa
EVM.MODEL.UTG4653.20	CAAT-box	CAAAT	1488	5	-	Pisum sativum	common cis-acting element in promoter and enhancer regions
EVM.MODEL.UTG4653.20	CAAT-box	CAAT	1511	4	+	Nicotiana glutinosa
EVM.MODEL.UTG4653.20	CAAT-box	CAAAT	1522	5	+	Pisum sativum	common cis-acting element in promoter and enhancer regions
EVM.MODEL.UTG4653.20	CAAT-box	CAAAT	1560	5	+	Pisum sativum	common cis-acting element in promoter and enhancer regions
EVM.MODEL.UTG4653.20	CAAT-box	CAAT	1756	4	+	Nicotiana glutinosa
EVM.MODEL.UTG4653.20	CAAT-box	CCAAT	1792	5	+	Arabidopsis thaliana	common cis-acting element in promoter and enhancer regions
EVM.MODEL.UTG4653.20	CAAT-box	CAAT	1793	4	+	Nicotiana glutinosa
EVM.MODEL.UTG4653.20	CAAT-box	CAAAT	1937	5	-	Pisum sativum	common cis-acting element in promoter and enhancer regions
EVM.MODEL.UTG4653.20	CAAT-box	CAAT	1947	4	+	Nicotiana glutinosa
EVM.MODEL.UTG4653.20	STRE	AGGGG	785	5	+	Arabidopsis thaliana
EVM.MODEL.UTG4653.20	STRE	AGGGG	1026	5	+	Arabidopsis thaliana
EVM.MODEL.UTG4653.20	Unnamed__1	CGTGG	1375	5	-	Zea mays
EVM.MODEL.UTG4653.20	MYB	CAACAG	442	6	+	Arabidopsis thaliana
EVM.MODEL.UTG4653.20	MYB	CAACAG	599	6	-	Arabidopsis thaliana
EVM.MODEL.UTG4653.20	MYC	CATGTG	260	6	+	Arabidopsis thaliana
EVM.MODEL.UTG4653.20	MYC	CATGTG	343	6	-	Arabidopsis thaliana
EVM.MODEL.UTG4653.20	MYC	CATGTG	565	6	-	Arabidopsis thaliana
EVM.MODEL.UTG4653.20	Myb	CAACTG	49	6	-	Arabidopsis thaliana
EVM.MODEL.UTG4653.20	Myb	CAACTG	1177	6	-	Arabidopsis thaliana
EVM.MODEL.UTG4653.20	Myb	TAACTG	1450	6	-	Arabidopsis thaliana
EVM.MODEL.UTG4653.20	AT~TATA-box	TATATA	351	6	+	Arabidopsis thaliana
EVM.MODEL.UTG4653.20	AT~TATA-box	TATATA	1922	6	-	Arabidopsis thaliana
EVM.MODEL.UTG4653.20	AT~TATA-box	TATATA	1924	6	-	Arabidopsis thaliana
EVM.MODEL.UTG4653.20	CAT-box	GCCACT	1877	6	-	Arabidopsis thaliana	cis-acting regulatory element related to meristem expression
EVM.MODEL.UTG4653.20	ERE	ATTTCATA	1647	8	+	Nicotiana glutinos
EVM.MODEL.UTG4653.20	GATA-motif	AAGATAAGATT	1316	10	-	Arabidopsis thaliana	part of a light responsive element
EVM.MODEL.UTG4653.20	ACE	GACACGTATG	1272	9	-	Petroselinum crispum	cis-acting element involved in light responsiveness
EVM.MODEL.UTG4653.20	TCT-motif	TCTTAC	294	6	-	Arabidopsis thaliana	part of a light responsive element
EVM.MODEL.UTG4653.20	TCT-motif	TCTTAC	573	6	-	Arabidopsis thaliana	part of a light responsive element
EVM.MODEL.UTG4653.20	TCT-motif	TCTTAC	1122	6	-	Arabidopsis thaliana	part of a light responsive element
EVM.MODEL.UTG4653.20	TCT-motif	TCTTAC	1323	6	+	Arabidopsis thaliana	part of a light responsive element
EVM.MODEL.UTG4653.20	TCT-motif	TCTTAC	1329	6	+	Arabidopsis thaliana	part of a light responsive element
EVM.MODEL.UTG4653.20		motif_sequence	76	4	-	organism	short_function
EVM.MODEL.UTG4653.20		motif_sequence	257	4	-	organism	short_function
EVM.MODEL.UTG4653.20		motif_sequence	342	4	-	organism	short_function
EVM.MODEL.UTG4653.20		motif_sequence	551	4	+	organism	short_function
EVM.MODEL.UTG4653.20		motif_sequence	553	4	-	organism	short_function
EVM.MODEL.UTG4653.20		motif_sequence	604	4	-	organism	short_function
EVM.MODEL.UTG4653.20		motif_sequence	678	4	-	organism	short_function
EVM.MODEL.UTG4653.20		motif_sequence	923	4	-	organism	short_function
EVM.MODEL.UTG4653.20		motif_sequence	1051	4	-	organism	short_function
EVM.MODEL.UTG4653.20		motif_sequence	1094	4	-	organism	short_function
EVM.MODEL.UTG4653.20		motif_sequence	1140	4	+	organism	short_function
EVM.MODEL.UTG4653.20		motif_sequence	1164	4	+	organism	short_function
EVM.MODEL.UTG4653.20		motif_sequence	1214	4	+	organism	short_function
EVM.MODEL.UTG4653.20	Myb-binding site	CAACAG	442	6	+	Nicotiana tabacum
EVM.MODEL.UTG4653.20	Myb-binding site	CAACAG	599	6	-	Nicotiana tabacum
EVM.MODEL.UTG4653.20	G-Box	CACGTT	903	6	+	Pisum sativum	cis-acting regulatory element involved in light responsiveness
EVM.MODEL.UTG4653.20	G-box	CACGAC	1376	6	+	Zea mays	cis-acting regulatory element involved in light responsiveness
EVM.MODEL.UTG4653.20	G-box	GCCACGTGGA	1873	9	-	Arabidopsis thaliana	cis-acting regulatory element involved in light responsiveness
EVM.MODEL.UTG4653.20	TATA-box	ATTATA	24	6	+	Brassica napus	core promoter element around -30 of transcription start
EVM.MODEL.UTG4653.20	TATA-box	TATAA	25	5	-	Arabidopsis thaliana	core promoter element around -30 of transcription start
EVM.MODEL.UTG4653.20	TATA-box	TATA	26	4	+	Arabidopsis thaliana	core promoter element around -30 of transcription start
EVM.MODEL.UTG4653.20	TATA-box	TATA	62	4	+	Arabidopsis thaliana	core promoter element around -30 of transcription start
EVM.MODEL.UTG4653.20	TATA-box	TATA	193	4	+	Arabidopsis thaliana	core promoter element around -30 of transcription start
EVM.MODEL.UTG4653.20	TATA-box	TATA	213	4	+	Arabidopsis thaliana	core promoter element around -30 of transcription start
EVM.MODEL.UTG4653.20	TATA-box	TATATA	351	6	+	Arabidopsis thaliana	core promoter element around -30 of transcription start
EVM.MODEL.UTG4653.20	TATA-box	TATA	353	4	+	Arabidopsis thaliana	core promoter element around -30 of transcription start
EVM.MODEL.UTG4653.20	TATA-box	ATTATA	528	6	+	Brassica napus	core promoter element around -30 of transcription start
EVM.MODEL.UTG4653.20	TATA-box	TATAA	529	5	-	Arabidopsis thaliana	core promoter element around -30 of transcription start
EVM.MODEL.UTG4653.20	TATA-box	TATA	530	4	+	Arabidopsis thaliana	core promoter element around -30 of transcription start
EVM.MODEL.UTG4653.20	TATA-box	ATTATA	582	6	+	Brassica napus	core promoter element around -30 of transcription start
EVM.MODEL.UTG4653.20	TATA-box	TATAA	583	5	-	Arabidopsis thaliana	core promoter element around -30 of transcription start
EVM.MODEL.UTG4653.20	TATA-box	TATA	584	4	+	Arabidopsis thaliana	core promoter element around -30 of transcription start
EVM.MODEL.UTG4653.20	TATA-box	TAAAGATT	620	8	+	Arabidopsis thaliana	core promoter element around -30 of transcription start
EVM.MODEL.UTG4653.20	TATA-box	TACAAAA	1012	7	-	Oryza sativa	core promoter element around -30 of transcription start
EVM.MODEL.UTG4653.20	TATA-box	TATA	1065	4	-	Arabidopsis thaliana	core promoter element around -30 of transcription start
EVM.MODEL.UTG4653.20	TATA-box	TACAAAA	1118	7	-	Oryza sativa	core promoter element around -30 of transcription start
EVM.MODEL.UTG4653.20	TATA-box	ATTATA	1305	6	+	Brassica napus	core promoter element around -30 of transcription start
EVM.MODEL.UTG4653.20	TATA-box	TATAA	1306	5	-	Arabidopsis thaliana	core promoter element around -30 of transcription start
EVM.MODEL.UTG4653.20	TATA-box	TATA	1307	4	-	Arabidopsis thaliana	core promoter element around -30 of transcription start
EVM.MODEL.UTG4653.20	TATA-box	TATAA	1540	5	-	Arabidopsis thaliana	core promoter element around -30 of transcription start
EVM.MODEL.UTG4653.20	TATA-box	TATA	1541	4	-	Arabidopsis thaliana	core promoter element around -30 of transcription start
EVM.MODEL.UTG4653.20	TATA-box	ATATAA	1563	6	+	Brassica oleracea	core promoter element around -30 of transcription start
EVM.MODEL.UTG4653.20	TATA-box	TATA	1564	4	-	Arabidopsis thaliana	core promoter element around -30 of transcription start
EVM.MODEL.UTG4653.20	TATA-box	ATTATA	1570	6	+	Brassica napus	core promoter element around -30 of transcription start
EVM.MODEL.UTG4653.20	TATA-box	TATAA	1571	5	-	Arabidopsis thaliana	core promoter element around -30 of transcription start
EVM.MODEL.UTG4653.20	TATA-box	TATA	1572	4	-	Arabidopsis thaliana	core promoter element around -30 of transcription start
EVM.MODEL.UTG4653.20	TATA-box	ATATAT	1584	6	-	Brassica napus	core promoter element around -30 of transcription start
EVM.MODEL.UTG4653.20	TATA-box	TATA	1585	4	-	Arabidopsis thaliana	core promoter element around -30 of transcription start
EVM.MODEL.UTG4653.20	TATA-box	ATTATA	1609	6	+	Brassica napus	core promoter element around -30 of transcription start
EVM.MODEL.UTG4653.20	TATA-box	TATAA	1610	5	-	Arabidopsis thaliana	core promoter element around -30 of transcription start
EVM.MODEL.UTG4653.20	TATA-box	TATA	1611	4	-	Arabidopsis thaliana	core promoter element around -30 of transcription start
EVM.MODEL.UTG4653.20	TATA-box	TATAAA	1619	6	-	Helianthus annuus	core promoter element around -30 of transcription start
EVM.MODEL.UTG4653.20	TATA-box	TATAA	1620	5	-	Arabidopsis thaliana	core promoter element around -30 of transcription start
EVM.MODEL.UTG4653.20	TATA-box	TATA	1621	4	-	Arabidopsis thaliana	core promoter element around -30 of transcription start
EVM.MODEL.UTG4653.20	TATA-box	TATAAA	1634	6	-	Helianthus annuus	core promoter element around -30 of transcription start
EVM.MODEL.UTG4653.20	TATA-box	TATAA	1635	5	-	Arabidopsis thaliana	core promoter element around -30 of transcription start
EVM.MODEL.UTG4653.20	TATA-box	TATA	1636	4	-	Arabidopsis thaliana	core promoter element around -30 of transcription start
EVM.MODEL.UTG4653.20	TATA-box	ATATAT	1761	6	-	Brassica napus	core promoter element around -30 of transcription start
EVM.MODEL.UTG4653.20	TATA-box	TATA	1762	4	-	Arabidopsis thaliana	core promoter element around -30 of transcription start
EVM.MODEL.UTG4653.20	TATA-box	TATA	1799	4	-	Arabidopsis thaliana	core promoter element around -30 of transcription start
EVM.MODEL.UTG4653.20	TATA-box	TATACA	1812	6	-	Helianthus annuus	core promoter element around -30 of transcription start
EVM.MODEL.UTG4653.20	TATA-box	TATA	1814	4	-	Arabidopsis thaliana	core promoter element around -30 of transcription start
EVM.MODEL.UTG4653.20	TATA-box	TATAAATA	1819	8	-	Daucus carota	core promoter element around -30 of transcription start
EVM.MODEL.UTG4653.20	TATA-box	TATAAAT	1820	7	-	Brassica juncea	core promoter element around -30 of transcription start
EVM.MODEL.UTG4653.20	TATA-box	TATAAA	1821	6	-	Helianthus annuus	core promoter element around -30 of transcription start
EVM.MODEL.UTG4653.20	TATA-box	TATAA	1822	5	-	Arabidopsis thaliana	core promoter element around -30 of transcription start
EVM.MODEL.UTG4653.20	TATA-box	TATA	1823	4	-	Arabidopsis thaliana	core promoter element around -30 of transcription start
EVM.MODEL.UTG4653.20	TATA-box	TATATA	1922	6	-	Arabidopsis thaliana	core promoter element around -30 of transcription start
EVM.MODEL.UTG4653.20	TATA-box	ATATAT	1923	6	-	Brassica napus	core promoter element around -30 of transcription start
EVM.MODEL.UTG4653.20	TATA-box	TATATA	1924	6	-	Arabidopsis thaliana	core promoter element around -30 of transcription start
EVM.MODEL.UTG4653.20	TATA-box	TATA	1926	4	-	Arabidopsis thaliana	core promoter element around -30 of transcription start
EVM.MODEL.UTG4653.20	GT1-motif	GGTTAA	239	6	+	Arabidopsis thaliana	light responsive element
EVM.MODEL.UTG4653.20	GT1-motif	GGTTAA	1598	6	-	Arabidopsis thaliana	light responsive element
EVM.MODEL.UTG4653.20	MBS	CAACTG	49	6	-	Arabidopsis thaliana	MYB binding site involved in drought-inducibility
EVM.MODEL.UTG4653.20	MBS	CAACTG	1177	6	-	Arabidopsis thaliana	MYB binding site involved in drought-inducibility
EVM.MODEL.UTG4653.20	LTR	CCGAAA	1221	6	-	Hordeum vulgare	cis-acting element involved in low-temperature responsiveness
EVM.MODEL.UTG4653.20	ABRE	ACGTG	903	5	-	Arabidopsis thaliana	cis-acting element involved in the abscisic acid responsiveness
EVM.MODEL.UTG4653.20	TGA-element	AACGAC	1170	6	+	Brassica oleracea	auxin-responsive element
EVM.MODEL.UTG4653.20	Myc	TCTCTTA	769	7	+	Arabidopsis thaliana
EVM.MODEL.UTG4653.20	Unnamed__4	CTCC	182	4	+	Petroselinum hortense
EVM.MODEL.UTG4653.20	Unnamed__4	CTCC	359	4	-	Petroselinum hortense
EVM.MODEL.UTG4653.20	Unnamed__4	CTCC	489	4	-	Petroselinum hortense
EVM.MODEL.UTG4653.20	Unnamed__4	CTCC	500	4	-	Petroselinum hortense
EVM.MODEL.UTG4653.20	Unnamed__4	CTCC	570	4	-	Petroselinum hortense
EVM.MODEL.UTG4653.20	Unnamed__4	CTCC	591	4	-	Petroselinum hortense
EVM.MODEL.UTG4653.20	Unnamed__4	CTCC	594	4	-	Petroselinum hortense
EVM.MODEL.UTG4653.20	Unnamed__4	CTCC	733	4	-	Petroselinum hortense
EVM.MODEL.UTG4653.20	Unnamed__4	CTCC	1051	4	-	Petroselinum hortense
EVM.MODEL.UTG4653.20	Unnamed__4	CTCC	1071	4	-	Petroselinum hortense
EVM.MODEL.UTG4653.20	Unnamed__4	CTCC	1112	4	+	Petroselinum hortense
EVM.MODEL.UTG4653.20	Unnamed__4	CTCC	1225	4	-	Petroselinum hortense
EVM.MODEL.UTG4653.20	Unnamed__4	CTCC	1865	4	+	Petroselinum hortense
EVM.MODEL.UTG4653.20	Unnamed__4	CTCC	1872	4	+	Petroselinum hortense
EVM.MODEL.UTG4653.20	Unnamed__4	CTCC	1883	4	+	Petroselinum hortense
EVM.MODEL.UTG4653.20	Unnamed__4	CTCC	1886	4	+	Petroselinum hortense
EVM.MODEL.UTG4653.25	AT~TATA-box	TATATA	1923	6	-	Arabidopsis thaliana
EVM.MODEL.UTG4653.25	AT~TATA-box	TATATA	1925	6	-	Arabidopsis thaliana
EVM.MODEL.UTG4653.25	CAT-box	GCCACT	1554	6	-	Arabidopsis thaliana	cis-acting regulatory element related to meristem expression
EVM.MODEL.UTG4653.25	Myb	TAACTG	1952	6	-	Arabidopsis thaliana
EVM.MODEL.UTG4653.25	STRE	AGGGG	378	5	-	Arabidopsis thaliana
EVM.MODEL.UTG4653.25	STRE	AGGGG	1057	5	-	Arabidopsis thaliana
EVM.MODEL.UTG4653.25	MYB	CAACAG	328	6	+	Arabidopsis thaliana
EVM.MODEL.UTG4653.25	MYB	TAACCA	493	6	-	Arabidopsis thaliana
EVM.MODEL.UTG4653.25	MYB	CAACCA	563	6	+	Arabidopsis thaliana
EVM.MODEL.UTG4653.25	MYC	CATGTG	438	6	-	Arabidopsis thaliana
EVM.MODEL.UTG4653.25	TATA	TATAAAAT	1529	8	+	Arabidopsis thaliana
EVM.MODEL.UTG4653.25	CAAT-box	CAAT	124	4	-	Nicotiana glutinosa
EVM.MODEL.UTG4653.25	CAAT-box	CAAT	198	4	+	Nicotiana glutinosa
EVM.MODEL.UTG4653.25	CAAT-box	CAAT	220	4	-	Nicotiana glutinosa
EVM.MODEL.UTG4653.25	CAAT-box	CAAT	354	4	+	Nicotiana glutinosa
EVM.MODEL.UTG4653.25	CAAT-box	CAAT	413	4	-	Nicotiana glutinosa
EVM.MODEL.UTG4653.25	CAAT-box	CAAAT	499	5	-	Pisum sativum	common cis-acting element in promoter and enhancer regions
EVM.MODEL.UTG4653.25	CAAT-box	CAAT	508	4	+	Nicotiana glutinosa
EVM.MODEL.UTG4653.25	CAAT-box	CCAAT	662	5	+	Arabidopsis thaliana	common cis-acting element in promoter and enhancer regions
EVM.MODEL.UTG4653.25	CAAT-box	CAAT	663	4	+	Nicotiana glutinosa
EVM.MODEL.UTG4653.25	CAAT-box	CCAAT	773	5	+	Arabidopsis thaliana	common cis-acting element in promoter and enhancer regions
EVM.MODEL.UTG4653.25	CAAT-box	CAAT	774	4	+	Nicotiana glutinosa
EVM.MODEL.UTG4653.25	CAAT-box	CAAAT	797	5	-	Pisum sativum	common cis-acting element in promoter and enhancer regions
EVM.MODEL.UTG4653.25	CAAT-box	CAAT	806	4	-	Nicotiana glutinosa
EVM.MODEL.UTG4653.25	CAAT-box	TGCCAAC	808	7	+	Petunia hybrida	common cis-acting element in promoter and enhancer regions
EVM.MODEL.UTG4653.25	CAAT-box	CAAAT	846	5	+	Pisum sativum	common cis-acting element in promoter and enhancer regions
EVM.MODEL.UTG4653.25	CAAT-box	CAAT	1174	4	-	Nicotiana glutinosa
EVM.MODEL.UTG4653.25	CAAT-box	CAAT	1228	4	+	Nicotiana glutinosa
EVM.MODEL.UTG4653.25	CAAT-box	CAAT	1252	4	+	Nicotiana glutinosa
EVM.MODEL.UTG4653.25	CAAT-box	CAAT	1488	4	-	Nicotiana glutinosa
EVM.MODEL.UTG4653.25	CAAT-box	CCAAT	1519	5	-	Arabidopsis thaliana	common cis-acting element in promoter and enhancer regions
EVM.MODEL.UTG4653.25	CAAT-box	CAAAT	1524	5	+	Pisum sativum	common cis-acting element in promoter and enhancer regions
EVM.MODEL.UTG4653.25	CAAT-box	CAAAT	1580	5	+	Pisum sativum	common cis-acting element in promoter and enhancer regions
EVM.MODEL.UTG4653.25	CAAT-box	CAAAT	1591	5	+	Pisum sativum	common cis-acting element in promoter and enhancer regions
EVM.MODEL.UTG4653.25	CAAT-box	CAAAT	1671	5	-	Pisum sativum	common cis-acting element in promoter and enhancer regions
EVM.MODEL.UTG4653.25	CAAT-box	CAAT	1695	4	+	Nicotiana glutinosa
EVM.MODEL.UTG4653.25	CAAT-box	CAAT	1768	4	+	Nicotiana glutinosa
EVM.MODEL.UTG4653.25	CAAT-box	CAAT	1805	4	+	Nicotiana glutinosa
EVM.MODEL.UTG4653.25	CAAT-box	CAAAT	1938	5	-	Pisum sativum	common cis-acting element in promoter and enhancer regions
EVM.MODEL.UTG4653.25	3-AF3 binding site	CACTATCTAAC	35	10	+	Pisum sativum	part of a conserved DNA module array (CMA3)
EVM.MODEL.UTG4653.25	GC-motif	CCCCCG	683	6	+	Zea mays	enhancer-like element involved in anoxic specific inducibility
EVM.MODEL.UTG4653.25	Box 4	ATTAAT	174	6	+	Petroselinum crispum	part of a conserved DNA module involved in light responsiveness
EVM.MODEL.UTG4653.25	Box 4	ATTAAT	1382	6	-	Petroselinum crispum	part of a conserved DNA module involved in light responsiveness
EVM.MODEL.UTG4653.25	Box 4	ATTAAT	1393	6	-	Petroselinum crispum	part of a conserved DNA module involved in light responsiveness
EVM.MODEL.UTG4653.25	Box 4	ATTAAT	1733	6	-	Petroselinum crispum	part of a conserved DNA module involved in light responsiveness
EVM.MODEL.UTG4653.25	Box 4	ATTAAT	1742	6	-	Petroselinum crispum	part of a conserved DNA module involved in light responsiveness
EVM.MODEL.UTG4653.25	Box 4	ATTAAT	1946	6	-	Petroselinum crispum	part of a conserved DNA module involved in light responsiveness
EVM.MODEL.UTG4653.25	ARE	AAACCA	99	6	+	Zea mays	cis-acting regulatory element essential for the anaerobic induction
EVM.MODEL.UTG4653.25	ARE	AAACCA	469	6	+	Zea mays	cis-acting regulatory element essential for the anaerobic induction
EVM.MODEL.UTG4653.25	ARE	AAACCA	1982	6	+	Zea mays	cis-acting regulatory element essential for the anaerobic induction
EVM.MODEL.UTG4653.25		motif_sequence	148	4	+	organism	short_function
EVM.MODEL.UTG4653.25		motif_sequence	266	4	-	organism	short_function
EVM.MODEL.UTG4653.25		motif_sequence	317	4	+	organism	short_function
EVM.MODEL.UTG4653.25		motif_sequence	323	4	+	organism	short_function
EVM.MODEL.UTG4653.25		motif_sequence	342	4	-	organism	short_function
EVM.MODEL.UTG4653.25		motif_sequence	520	4	-	organism	short_function
EVM.MODEL.UTG4653.25		motif_sequence	1019	4	-	organism	short_function
EVM.MODEL.UTG4653.25		motif_sequence	1034	4	-	organism	short_function
EVM.MODEL.UTG4653.25		motif_sequence	1156	4	-	organism	short_function
EVM.MODEL.UTG4653.25		motif_sequence	1163	4	-	organism	short_function
EVM.MODEL.UTG4653.25	GATA-motif	AAGGATAAGG	1060	9	-	Solanum tuberosum	part of a light responsive element
EVM.MODEL.UTG4653.25	CGTCA-motif	CGTCA	605	5	+	Hordeum vulgare	cis-acting regulatory element involved in the MeJA-responsiveness
EVM.MODEL.UTG4653.25	CGTCA-motif	CGTCA	958	5	-	Hordeum vulgare	cis-acting regulatory element involved in the MeJA-responsiveness
EVM.MODEL.UTG4653.25	ERE	ATTTTAAA	822	8	-	Nicotiana glutinos
EVM.MODEL.UTG4653.25	chs-CMA2a	TCACTTGA	1318	8	-	Petroselinum crispum	part of a light responsive element
EVM.MODEL.UTG4653.25	TATA-box	TATACA	222	6	-	Helianthus annuus	core promoter element around -30 of transcription start
EVM.MODEL.UTG4653.25	TATA-box	TATA	224	4	+	Arabidopsis thaliana	core promoter element around -30 of transcription start
EVM.MODEL.UTG4653.25	TATA-box	TACATAAA	343	8	+	Oryza sativa	core promoter element around -30 of transcription start
EVM.MODEL.UTG4653.25	TATA-box	TATAA	882	5	-	Arabidopsis thaliana	core promoter element around -30 of transcription start
EVM.MODEL.UTG4653.25	TATA-box	TATA	883	4	+	Arabidopsis thaliana	core promoter element around -30 of transcription start
EVM.MODEL.UTG4653.25	TATA-box	TATA	1196	4	-	Arabidopsis thaliana	core promoter element around -30 of transcription start
EVM.MODEL.UTG4653.25	TATA-box	TACAAAA	1244	7	-	Oryza sativa	core promoter element around -30 of transcription start
EVM.MODEL.UTG4653.25	TATA-box	TACATAAA	1268	8	-	Oryza sativa	core promoter element around -30 of transcription start
EVM.MODEL.UTG4653.25	TATA-box	ATTATA	1464	6	+	Brassica napus	core promoter element around -30 of transcription start
EVM.MODEL.UTG4653.25	TATA-box	TATAA	1465	5	-	Arabidopsis thaliana	core promoter element around -30 of transcription start
EVM.MODEL.UTG4653.25	TATA-box	TATA	1466	4	-	Arabidopsis thaliana	core promoter element around -30 of transcription start
EVM.MODEL.UTG4653.25	TATA-box	TAAAGATT	1508	8	-	Arabidopsis thaliana	core promoter element around -30 of transcription start
EVM.MODEL.UTG4653.25	TATA-box	TATTTAAA	1512	8	-	Arabidopsis thaliana	core promoter element around -30 of transcription start
EVM.MODEL.UTG4653.25	TATA-box	ATTATA	1527	6	+	Brassica napus	core promoter element around -30 of transcription start
EVM.MODEL.UTG4653.25	TATA-box	TATAA	1528	5	-	Arabidopsis thaliana	core promoter element around -30 of transcription start
EVM.MODEL.UTG4653.25	TATA-box	TATA	1529	4	-	Arabidopsis thaliana	core promoter element around -30 of transcription start
EVM.MODEL.UTG4653.25	TATA-box	TACAAAA	1618	7	+	Oryza sativa	core promoter element around -30 of transcription start
EVM.MODEL.UTG4653.25	TATA-box	ATATAA	1635	6	+	Brassica oleracea	core promoter element around -30 of transcription start
EVM.MODEL.UTG4653.25	TATA-box	TATA	1636	4	-	Arabidopsis thaliana	core promoter element around -30 of transcription start
EVM.MODEL.UTG4653.25	TATA-box	ATATAA	1649	6	+	Brassica oleracea	core promoter element around -30 of transcription start
EVM.MODEL.UTG4653.25	TATA-box	TATA	1650	4	-	Arabidopsis thaliana	core promoter element around -30 of transcription start
EVM.MODEL.UTG4653.25	TATA-box	ATTATA	1705	6	+	Brassica napus	core promoter element around -30 of transcription start
EVM.MODEL.UTG4653.25	TATA-box	TATAA	1706	5	-	Arabidopsis thaliana	core promoter element around -30 of transcription start
EVM.MODEL.UTG4653.25	TATA-box	TATA	1707	4	-	Arabidopsis thaliana	core promoter element around -30 of transcription start
EVM.MODEL.UTG4653.25	TATA-box	TATA	1811	4	-	Arabidopsis thaliana	core promoter element around -30 of transcription start
EVM.MODEL.UTG4653.25	TATA-box	TATAAAT	1823	7	-	Brassica juncea	core promoter element around -30 of transcription start
EVM.MODEL.UTG4653.25	TATA-box	TATAAA	1824	6	-	Helianthus annuus	core promoter element around -30 of transcription start
EVM.MODEL.UTG4653.25	TATA-box	TATAA	1825	5	-	Arabidopsis thaliana	core promoter element around -30 of transcription start
EVM.MODEL.UTG4653.25	TATA-box	TATA	1826	4	-	Arabidopsis thaliana	core promoter element around -30 of transcription start
EVM.MODEL.UTG4653.25	TATA-box	TATAAATA	1831	8	-	Daucus carota	core promoter element around -30 of transcription start
EVM.MODEL.UTG4653.25	TATA-box	TATAAAT	1832	7	-	Brassica juncea	core promoter element around -30 of transcription start
EVM.MODEL.UTG4653.25	TATA-box	TATAAA	1833	6	-	Helianthus annuus	core promoter element around -30 of transcription start
EVM.MODEL.UTG4653.25	TATA-box	TATAA	1834	5	-	Arabidopsis thaliana	core promoter element around -30 of transcription start
EVM.MODEL.UTG4653.25	TATA-box	TATA	1835	4	-	Arabidopsis thaliana	core promoter element around -30 of transcription start
EVM.MODEL.UTG4653.25	TATA-box	TATATA	1923	6	-	Arabidopsis thaliana	core promoter element around -30 of transcription start
EVM.MODEL.UTG4653.25	TATA-box	ATATAT	1924	6	-	Brassica napus	core promoter element around -30 of transcription start
EVM.MODEL.UTG4653.25	TATA-box	TATATA	1925	6	-	Arabidopsis thaliana	core promoter element around -30 of transcription start
EVM.MODEL.UTG4653.25	TATA-box	TATA	1927	4	-	Arabidopsis thaliana	core promoter element around -30 of transcription start
EVM.MODEL.UTG4653.25	TATA-box	taTATAAAtc	1937	9	-	Arabidopsis thaliana	core promoter element around -30 of transcription start
EVM.MODEL.UTG4653.25	TATA-box	TATACA	1941	6	-	Helianthus annuus	core promoter element around -30 of transcription start
EVM.MODEL.UTG4653.25	TATA-box	TATA	1943	4	-	Arabidopsis thaliana	core promoter element around -30 of transcription start
EVM.MODEL.UTG4653.25	re2f-1	GCGGGAAA	167	8	+	Oryza sativa
EVM.MODEL.UTG4653.25	G-Box	CACGTG	766	6	+	Pisum sativum	cis-acting regulatory element involved in light responsiveness
EVM.MODEL.UTG4653.25	G-box	CACGTG	766	6	+	Arabidopsis thaliana	cis-acting regulatory element involved in light responsiveness
EVM.MODEL.UTG4653.25	G-box	CACGAC	1675	6	-	Zea mays	cis-acting regulatory element involved in light responsiveness
EVM.MODEL.UTG4653.25	G-box	CACGAC	1714	6	-	Zea mays	cis-acting regulatory element involved in light responsiveness
EVM.MODEL.UTG4653.25	TGACG-motif	TGACG	605	5	-	Hordeum vulgare	cis-acting regulatory element involved in the MeJA-responsiveness
EVM.MODEL.UTG4653.25	TGACG-motif	TGACG	958	5	+	Hordeum vulgare	cis-acting regulatory element involved in the MeJA-responsiveness
EVM.MODEL.UTG4653.25	as-1	TGACG	605	5	-	Arabidopsis thaliana
EVM.MODEL.UTG4653.25	as-1	TGACG	958	5	+	Arabidopsis thaliana
EVM.MODEL.UTG4653.25	Myb-binding site	CAACAG	328	6	+	Nicotiana tabacum
EVM.MODEL.UTG4653.25	AAGAA-motif	GAAAGAA	1336	7	+	Avena sativa
EVM.MODEL.UTG4653.25	Unnamed__4	CTCC	284	4	+	Petroselinum hortense
EVM.MODEL.UTG4653.25	Unnamed__4	CTCC	337	4	+	Petroselinum hortense
EVM.MODEL.UTG4653.25	Unnamed__4	CTCC	392	4	+	Petroselinum hortense
EVM.MODEL.UTG4653.25	Unnamed__4	CTCC	594	4	+	Petroselinum hortense
EVM.MODEL.UTG4653.25	Unnamed__4	CTCC	626	4	+	Petroselinum hortense
EVM.MODEL.UTG4653.25	Unnamed__4	CTCC	681	4	+	Petroselinum hortense
EVM.MODEL.UTG4653.25	Unnamed__4	CTCC	830	4	-	Petroselinum hortense
EVM.MODEL.UTG4653.25	Unnamed__4	CTCC	946	4	-	Petroselinum hortense
EVM.MODEL.UTG4653.25	Unnamed__4	CTCC	996	4	+	Petroselinum hortense
EVM.MODEL.UTG4653.25	Unnamed__4	CTCC	1031	4	-	Petroselinum hortense
EVM.MODEL.UTG4653.25	Unnamed__4	CTCC	1034	4	-	Petroselinum hortense
EVM.MODEL.UTG4653.25	Unnamed__4	CTCC	1298	4	-	Petroselinum hortense
EVM.MODEL.UTG4653.25	Unnamed__4	CTCC	1628	4	-	Petroselinum hortense
EVM.MODEL.UTG4653.25	Unnamed__4	CTCC	1876	4	+	Petroselinum hortense
EVM.MODEL.UTG4653.25	Unnamed__4	CTCC	1890	4	+	Petroselinum hortense
EVM.MODEL.UTG4653.25	Unnamed__4	CTCC	1905	4	+	Petroselinum hortense
EVM.MODEL.UTG4653.25	W box	TTGACC	1489	6	+	Arabidopsis thaliana
EVM.MODEL.UTG4653.25	ABRE	CACGTG	766	6	+	Arabidopsis thaliana	cis-acting element involved in the abscisic acid responsiveness
EVM.MODEL.UTG4653.25	ABRE	ACGTG	767	5	+	Arabidopsis thaliana	cis-acting element involved in the abscisic acid responsiveness
EVM.MODEL.UTG4653.25	LTR	CCGAAA	697	6	+	Hordeum vulgare	cis-acting element involved in low-temperature responsiveness
EVM.MODEL.UTG4653.25	MYB-like sequence	TAACCA	493	6	-	Arabidopsis thaliana
EVM.MODEL.UTG4653.25	WUN-motif	CAATTACAT	1252	9	+	Nicotiana glutinosa
EVM.MODEL.UTG4653.25	ATCT-motif	AATCTAATCC	406	9	-	Pisum sativum	part of a conserved DNA module involved in light responsiveness
EVM.MODEL.UTG4653.25	GT1-motif	GGTTAA	83	6	-	Arabidopsis thaliana	light responsive element
EVM.MODEL.UTG4653.25	GT1-motif	GGTTAAT	494	7	+	Avena sativa	light responsive element
EVM.MODEL.UTG4653.25	GT1-motif	GTGTGTGAA	1330	9	+	Solanum tuberosum	light responsive element
